# Supplementary material for: Genome Structure ofBacillus cereustsu1 and Genes Involved in Cellulose Degradation and Poly-3-Hydroxybutyrate Synthesis
Source: Hindawi journal article supplement (doi:10.1155/2017/6192924), 2017-01-01
Supplement: f1 [file 6192924.f1.pdf]

## Supporting files

### Genome Structure of *Bacillus cereus* tsu1 and Genes Involved in Cellulose Degradation and Poly-3-hydroxybutyrate Synthesis

Hui Li<sup>a</sup>, Suping Zhou<sup>a\*</sup>, Terrance Johnson<sup>a</sup>, Koen Vercruysse<sup>a</sup>, Ouyang Lizhi<sup>a</sup>, Parthasarathy Ranganathan<sup>a</sup>, Nsoki Phambu<sup>a</sup>, Alexander J. Ropelewski<sup>b</sup>, Theodore W. Thannhauser<sup>c</sup>

<sup>a</sup>College of Agriculture, Human and Natural Sciences, Tennessee State University, Nashville, Tennessee, USA

<sup>b</sup>Pittsburgh Supercomputing Center, Pittsburgh, Pennsylvania, USA;

<sup>c</sup>R.W. Holley Center for Agriculture and Health, Plant, Soil and Nutrition Research Unit, USDA, ARS, Ithaca, New York, USA

## Table of contents

Table S1. Genome assembled scaffolds used for creating circular genome map of *Bacillus cereus* tsu1

Table S2. Five PHB biosynthesis pathway genes- *phaA*, *phaB*, *phaC*, *phaR*, *phaP* were cloned. The gene sequences and primers designed for cloning are listed

Table S3. The alignment of peptide sequences of recombinant proteins to predicted proteins in PHB biosynthesis pathway in *Bacillus cereus* tsu1

Table S4. HPLC analysis of purity of poly-(R)-3-hydroxybutyrate (PHB) extracts from *Bacillus cereus* tsu1

Table S5 Extracellular proteomic of *Bacillus cereus* tsu1 grown in M9 minimal salt medium supplemented with 1% CMC was analyzed by liquid chromatography (LC)/mass spectrometry (MS).

Table S6. The peak positions at known vibrational modes for poly-(R)-3-hydroxybutyrate (PHB) produced by *Bacillus cereus* tsu1 on rapeseed cake substrates

Table S7 *Bacillus cereus* tsu1 genes related with cellulose degradation and PHB biosynthesis.

Figure S1. The phylogenetic COGs ranking was developed by comparing *B. cereus* tsu1 with the deposited genomes in the Bacteria domain

Figure S2. Extracellular proteins of *B. cereus* tsu1 was separated on 10-20% SDS-PAGE gel.

Figure S3. Amino acid analysis of rapeseed cake water extract

Figure S4. Schematic representation of the pathways for the generation of poly-(R)-3-hydroxybutyrate (PHB) based on the genomic structure of *Bacillus cereus* tsu1 and composition of rapeseed cake

### **Supplemental figure legends**

Figure S1. The phylogenetic tree of *Bacillus cereus* tsu1

The *Bacillus cereus* tsu1 genome sequence data was generated using next generation sequencing analysis. It was assembled into 36 scaffolds. The annotated assembled contigs were also deposited in the Integrated Microbial Genomes & Microbiomes databases (Join Genome Institute, accession 2648501652). The phylogenetic COGs ranking was developed by comparing *B. cereus* tsu1 with the deposited genomes in the Bacteria domain.

Figure S2. Extracellular proteins of *B. cereus* tsu1 separated on SDS-PAGE gel

Extracellular proteins of *B. cereus* tsu1 growing in M9 minimal medium supplemented with 1% CMC broth were extracted and loaded on 10-20% SDS-PAGE gel, five bands at 25, 35, 40, 65, and 150 kDa were cut for subsequent MS analysis.

Figure S3. Amino acid composition of the aqueous extracts of rapeseed cake

Rapeseed cake samples (25 g per sample) were soaked in 1 L water overnight under constant stirring. The supernatant filtered through a 0.22  $\mu\text{m}$  filtration system (EMD Millipore, Massachusetts) was submitted for amino acid analysis on an L-8800 Hitachi analyzer in the Molecular Structure Facility at University of California at Davis.

Figure S4. Schematic representation of the pathways for the generation of poly-(R)-3-hydroxybutyrate (PHB) based on the genomic structure of *Bacillus cereus* tsu1 and composition of rapeseed cake

The first PHB biosynthesis pathway using acetyl-CoA substrate involves an acetoacetyl-CoA thiolase (1), acetoacetyl-coA reductase (2) and a 3HB-CoA dehydrogenase (3). The second alternative metabolic route is from  $\gamma$ -amino-butyric acid (GABA). Genes identified in *Bacillus cereus* tsu1 involves the following processes: GABA and Glutamate uptake; endogenous formation of Glutamate from alpha-KG involving a glutamate dehydrogenase (4, GenBank ID: KGT44639.1 ), then into GABA through glutamate decarboxylase (5, GenBank ID: KGT45792.1); conversion of GABA into succinate-semialdehyde (SSA) through a GABA transaminase (6, GenBank ID: KGT45608.1) and conversion of Succinyl-CoA through SSA dehydrogenase (7, GenBank ID: KGT45610.1); SSA reduction by the  $\gamma$ -hydroxybutyric acid (GHB) dehydrogenase (8, GenBank ID: KGT41557.1); and activated to 4-hydroxybutyryl-CoA by a co-enzyme A transferase enzyme (9, GenBank ID: KGT44257.1); and polymerization of GHB and 3-HB by PHB synthase (3, GenBank ID: KGT44863.1). The third pathway is that phaJ gene, encoding R-specific enoyl-CoA hydratase (11, GenBank ID: KGT44860.1), work together with another acyl-CoA dehydrogenase (10, GenBank ID: KGT41138.1) to form (R)-3HB-CoA via crotonyl-CoA intermediate from fatty acid  $\beta$ -oxidation.

| Table S2 Five genes from PHB biosynthesis pathway were cloned.                                                                                                                                                                                                                                                                                                                                                                                                                                                                                                                                                                                                                                                                                                                                                                                                                                                                                                                                                                                                                                                                                                                                                                                   |                                               |                        |                                                                     |
|--------------------------------------------------------------------------------------------------------------------------------------------------------------------------------------------------------------------------------------------------------------------------------------------------------------------------------------------------------------------------------------------------------------------------------------------------------------------------------------------------------------------------------------------------------------------------------------------------------------------------------------------------------------------------------------------------------------------------------------------------------------------------------------------------------------------------------------------------------------------------------------------------------------------------------------------------------------------------------------------------------------------------------------------------------------------------------------------------------------------------------------------------------------------------------------------------------------------------------------------------|-----------------------------------------------|------------------------|---------------------------------------------------------------------|
| PHB biosynthesis pathway genes                                                                                                                                                                                                                                                                                                                                                                                                                                                                                                                                                                                                                                                                                                                                                                                                                                                                                                                                                                                                                                                                                                                                                                                                                   |                                               |                        |                                                                     |
| Protein Name                                                                                                                                                                                                                                                                                                                                                                                                                                                                                                                                                                                                                                                                                                                                                                                                                                                                                                                                                                                                                                                                                                                                                                                                                                     | Scaffold location                             | GenBank ID/locus_tag   | Primers Designed for Cloning                                        |
| Name=Acetyl-CoA acetyltransferase (PhaA)                                                                                                                                                                                                                                                                                                                                                                                                                                                                                                                                                                                                                                                                                                                                                                                                                                                                                                                                                                                                                                                                                                                                                                                                         | BCtsu1_scaffold17_size11011_09_322327..323502 | KGT41550.1/ IY08_20320 | F:CACCATGCATAATGTTGTTATTACAGC<br>R:TAGTGCTTCTATAAATAAGGCA           |
| Name=Acetoacetyl-CoA reductase (PhaB)                                                                                                                                                                                                                                                                                                                                                                                                                                                                                                                                                                                                                                                                                                                                                                                                                                                                                                                                                                                                                                                                                                                                                                                                            | BCtsu1_scaffold9_size945600_552131..552874    | KGT44864.1/ IY08_06450 | F:CACCATGGTTCAATTAATGAAAAAGTAGC<br>R:CATATATAATCCGCCGTTAATGTTT      |
| Name=poly(R)-hydroxyalkanoic acid synthase (PhaC)                                                                                                                                                                                                                                                                                                                                                                                                                                                                                                                                                                                                                                                                                                                                                                                                                                                                                                                                                                                                                                                                                                                                                                                                | BCtsu1_scaffold9_size945600_552958..554043    | KGT44865.1/ IY08_06455 | F:CACCATGACTACATTGCAACAGAATG<br>R:ATTAGAACGCTCTTCAAGCCAA            |
| Name=PhaP_Bmeg                                                                                                                                                                                                                                                                                                                                                                                                                                                                                                                                                                                                                                                                                                                                                                                                                                                                                                                                                                                                                                                                                                                                                                                                                                   | BCtsu1_scaffold9_size945600_550280..550804    | KGT44861.1/ IY08_06435 | F:CACCATGGAAACTAAACCATACGAATTAGTC<br>R:CTTGATGGAAGTAAATAGATTTTTTTGA |
| Name=PhaR protein (synthase subunit )                                                                                                                                                                                                                                                                                                                                                                                                                                                                                                                                                                                                                                                                                                                                                                                                                                                                                                                                                                                                                                                                                                                                                                                                            | BCtsu1_scaffold9_size945600_551498..551980    | KGT44863.1/ IY08_06445 | F:CACCGTGATTGATCAAAAATTTCGATCC<br>R:TTTTTTATTTTCTGGCTTATTCGC        |
| Gene Sequences                                                                                                                                                                                                                                                                                                                                                                                                                                                                                                                                                                                                                                                                                                                                                                                                                                                                                                                                                                                                                                                                                                                                                                                                                                   |                                               |                        |                                                                     |
| <p>phaA: <b>ATG</b>CATAATGTTGTTATTACAGCTGCAGTTCGTTCCGCAATTGGAACTTTTGGAGGAGCGCTAAAAATGTAACGCCAGTAGAATTAGCTGTTCCGTACTTCAGGAAGCTGTAAAACGAGGCGGGGTAGAACCCACATGAAGTTGATGAAGTAATTTTAGGTCATTGTATTCAAAGAACTGATGAAGCAAATACGGCGAGAACAGCTGCATTAGCGGCAGGATTTCTTGACACAGTTACGGGATATACAATCCAACGCCAATGTTCTTCAGGTATGCAAGCAATTATGTCAGCTGCAATGCAAATCCAATTAGGTGTAAGTGATGTTGTTGTTGTCAGGTGGAGTAGAAGCGATGAGTTCGAGCCCTTATGCATTGAACAGCACCGCTGGGGACAACGTCTACAGCACGGAGAAATTCGTGATACGGTGTGGGAAGTGTTAGAAGACCCGATTACCATATTATGATGGGTGAAACAGCGGAAAAATTTAGTTGAACAATATGAATTTACAAGAGAGGAACAAGATGAAGTTGCTCTTCGCAGTCATACATTGGCACTGAAGGCAATCGAGTCTGGATACTTTGACGATCAAATTGTTCCATTACAATAAAAGAGCGTAGAAAAAGAAAGTTATATTTTCGAAGGATGAACATCCACGTGCAGATATTACAGCTGAAAAATTAGCTGGATTGAAGCCGGCATTCCGTAAAGATGGATCAGTGACTGCGGGGAATGCATCTGGCCTTAATGACGGGAGTG CAGTTCTAGTATTAATGAGCGAAGAAAAAGCGAAAGAAAAAGGTTTACAACCGTTAGCTAGAATTGTTGGATATTCAGTAGCTGGAGTAGATCCAAAAATTATGGGTATTGGACCAGCACCAGCAATTCGTAAAGGTTTAGAAAAAGTAGATTGGTCATTGGAAGATGCAGATTTACTTGAATTAATGAAGCTTTCGCGGCTCAATATTTAGCTGTAGAGAAAGAGTTAGGCTTAGACCGTGAAAAAGTGAACGTAAACGGTAGTGGCGTAGGACTTGGGCATCCAATTGGTTGTACAGGGGCTCGTATTACAGTAAGTTAATTACGAATTA AAAAGACGTGGGTAGAAAAAGGAATTGCCTCTTTATGCGTCGGTGCGGTATCGGGGTTGCCTTATTTATAGAAGCACTA<b>TAA</b></p> |                                               |                        |                                                                     |
| <p>phaB: <b>ATG</b>GTTCAATTAATGAAAAAGTAGCAATCGTAACAGGTGGAGCAAAAGGAATTGGAAAAGCGATTACAGTAGCATTAGCACAAAGAGGGAGCAAAAGTAGTTATTA ACTATAATAGCAGTAAAGAACAGCTGAAAACTTAGTAAACGAATTAGGAAAAGACGGACATGACGTTTATGCAGTGCAAGCGGATGTTTCTAAAGTAGAAGATGCAAACCGACTTG TAGAAGAAGCTGTGAATCATTTTGGTAAAGTTGATATTCTTGTTAATAATGCTGGTATTACAAGAGATCGTACATTCAAAAAGTTAAATCGTGAAGATTGGGAGCGCGTAATTGACGTGAATTTAAGTAGCGTATTTAATACGACAAGCGCGGTTCTTCCATACATAACTGAAGCGGAAGAAGGAAGGATTATTAGCATTCTTCTATTATTGGTCAAGCAGGTGGATTGGCCAAACAACTACTCAGCAGCAAAAGCAGGTATGCTAGGATTTACAAAATCGTTAGCGTTAGA ACTTGCAAAAACAAATGTCACGTGTAACGCTATTGCCCAGGATTTATTGATACTGAAATGGTAGCAGAAGTACCAGAAGAAGTACGTCAAAAAATCGTTGCAAAAATCCCGAAAAACGTTTGGTCAAGCCGATGAAATTGCAAAAAGGTGTAGTATACCTATGCCGTGACGGTGC GTATATCACAGGTCAACAATTAAACATTAAACGGCGGATTATATATG<b>TAA</b></p>                                                                                                                                                                                                                                                                                                                                                                                                                                               |                                               |                        |                                                                     |

phaC: **ATG**ACTACATTTCGCAACAGAATGGGAAAAGCAATTAGAGCTATACCCAGAAGAGTACCGAAAAAGCATACCGCCGAGTGAAAAGGGCGAGTGAAATTTTATTACGTGAACCAGAGCCGCAAGT  
AGGGTTAACGCCGAAAGAGGTTATTTGGACGAAGAATAAGACGAAGCTTTATCGCTACATTCCAAAACAAGAAAAAACACAAAGAGTTCCAATTCTGTAAATATATGCTCTTATTAATAAACCATAT  
ATTATGGATTTAACTCCTGGAAATAGTTTAGTGGAATATCTAGTGGATCGTGGTTTTGATGTGTATATGCTTGATTGGGGCACATTTGGTTTAGAAGATAGTCATTTGAAATTTGATGATTTTGTGT  
TTGATTATATTGCAAAAGCAGTAAAAAAGTAATGCGAACTGCAAAATCGGACGAGATTTCTTTACTTGGTTATTGCATGGGTGGAACGCTAACTTCTATTTATGCAGCACTTCATCCGCACATGCC  
AATTCGTAATTTAATTTTCATGACAAGTCCTTTTGATTCTCTGAAACAGGATTGTATGGCCCTTTATTAGATGAGAAATACTTCAATTTAGATAAAGCGGTTGATACATTTGGAAATATTCCGCCA  
GAAATGATTGATTTTCGGAACAAAATGTTAAAGCCAATTACGAACTTTGTTGGTCCATATGTTGCTTTAGTAGATCGTTCAGAGAATGAGCGCTTCGTCGAAAGCTGGAGATTGGTTCAAAAGTGGG  
TTGGTGATGGTATTCCGTTCCCAGGTGAATCATACAGACAGTGGATTCTGTGATTTTTATCAAAATAATAAGTTGGTTAAGGGTGAAGTTCGTTATTCGCGGACAAAAGGTAGACCTTGCAAATATTAA  
GGCGAATGTCCTTAAATATTTCCGGGAAACGTGATCATATCGCTTTGCCATGTCAAGTAGAAGCATTACTAGACCATATTTCTAGCACAGATAAAACAATATGTATGTTTACCAACAGGGCATATGTCT  
ATCGTTTACGGTGGAACAGCTGTAAAACAAACATATCCGACGATTGGAAATTGGCTTGAAGAGCGTTCTAAT**TAA**

phaR: **GTG**ATTGATCAAAAATTCGATCCACTACAAGCATGGAAAAATGCTTATGAACAAACCGAAACATTTTGGGGAAAAGCGCTCAATGAACAATTAACAGAGAATATTCTGCTTGGATGGG  
CAGCGTTCTAGATTTGAATTTGTTTTATCAAAAAGCATTAAATGATACGACAAAAAACTATTTAGAACAAGTAAATGTGCCGACGAAAGAGGATATCGCAAGAGTAGCTACGCTAGTTATTAACCTTA  
GAAAATAAAGTAGATAACATTGAGGAGTTCTAGAGGAAAAAGTAGATTCTTTAGGACAAGCTCCTACATTAAAGCGTGATGTAACGAAAGTAAACAAGATATTCGTACGCTTGAAACAAAAGTAG  
ATCAAATTTTGAATTGCTAGAAAAGCAAAATGCAGTACTAGCTAACTACAAGTACCTGTAAAAGAAGAGGTAAAGCCTGCGAATAAGCCAGAAAATAAAAA**TGA**

phaP: **ATG**GAAACTAAACCATACGAATTAGTCGATGCATTTTGGAAAACTGGTCTCAATCACTTTCCCTTTTCTCTTCAGCTGGGAAACAATTAGAGCAGCTTACTTTAGAAACATTAAAAACAACA  
ACAAGACGCTTTGCATAAATTAACATCAGGAGTAGATGAACTAGAAAAAGAACTACAACAACCTACTGCTCAGTTCAACAACCAATATACAGATTACGTGAAACAATTAAGTGGAACTCCTTAAAT  
GATCAAATTAACGAGTGGCAGGACAAATGGAAGGAACCTTCTGCTCATATGCATCAACTTACTGTTTCTCCTACAAAAACATCTTTGTCAATTCTTACACAAACAAGCGGTCAATTTGAAGAAACAA  
CAAAACAATTTATTGTGCAACAACAATTACAACGTGAAGAGGCTCAAAAAACAGTTAGAGGGTTTTTTTGAAGAGTTCAAGTCAAAACAGTTGGAAGTTCGCAAAAAAGTTCGAGGAAACCTCAAAAA  
TCTATTTACTTCCATCAAG**TAA**

Table S3 The alignment of peptide sequences of recombinant proteins to predicted proteins in PHB biosynthesis pathway in *Bacillus cereus* tsu1<sup>a</sup>

| Protein name | Peptides identified 2D-MS <sup>b</sup>                                                                                                                                                                                                                                                                                                                                                                                                         |
|--------------|------------------------------------------------------------------------------------------------------------------------------------------------------------------------------------------------------------------------------------------------------------------------------------------------------------------------------------------------------------------------------------------------------------------------------------------------|
| PhaA         | MHNVVITA AVR;SPIGTFGGALK;NVTPVELAVPVLQEAVK;R;GGVEPHEVDEVILGHCIQR;TDEANTAR;TAALAAGFPDVTVTGYTIQR;QCSSGMQAIMSAAMQIQLGVSDV VVAGGVEAMSSSPYALK;QHR;WGQR;LQHGEIR;DTVWEVLEDPIHHIMMGETAENLVEQYEITR;EEQDEVALR;SHTLALK;AIESGYFDDQIVPITIK;ERR;KEVIFSK;DEHPR;ADITAEK;LAGLK;PAFRK;DGSVTAGNASGLNDGSAVLVLMSEEK;AK;EK;GLQPLAR;IVGYSVAGVDPK;IMGIGPAPAIRK;GLEK;VDWSLEDADLLEINEAFAAQYLAVEK;ELGLDR;EK;VNVNGSGVGLGHPIGCTGAR;ITVSLIHELK;RR;GLEK;GIASLCVGGGIGVALFIEAL; |
| PhaB         | MVQLNGK;VAIVTGGAK;GIGK;AITVALAQEGAK;VVINYNSSKEAAENLVNELGK;DGHVYAVQADVSK;VEDANR;LVEEAVNHFGK;VDILVNNAGITR;DR;TFKK;LNREDWER;VIDVNLSSVFNTTSAVL PYITEAEEGR;IISISSIIGQAGGFGQTNYSAAK;AGMLGFTK;SLALELAK;TNVTVNAICPGFIDTEMVAEVPEEVR;QK;IVAK;IPKK;RFGQADEIAK;GVVYLCR;DGAYITGQQLNINGGLYM;                                                                                                                                                                 |
| PhaC         | MTTFATEWEK;QLELYPEEYRK;AYRR;VKR;ASEILLR;EPEPQVGLTPK;EVIWTK;NK;TK;LYRYIPK;QEK;TQR;VPILLIYALINK;PYIMDLTPGNSLVEY;LVDR;GFDVYMLDWGTFGLEDSHLK;FDDDFVFDYIAK;AVKK;VMRTAK;SDEISLLGYCMGGTLTSIYAALHPHMPPIR;NLIFMTPFDFSETGLYGPLLDEK;YFNLDK;AVDTFGNIPPEMIDFGNK;MLK;PITNFVGPYVALVDR;SENER;FVESWR;LVQK;WVG DGIPFPGESYR;QWIR;DFYQNNK;LVK;GELVIR;GQK;VDLANIK;ANVLNISGKR;DHIALPCQVEALLDHISSTDK;QYVCLPTGHMSIVYGGTAVK;QTYPTIGNWLEER;SN;                            |
| PhaR         | VIDQK;FDPLQAWK;NAYEQTETFWGK;ALNETIK;TEEYSAWMGSVLDLNLFYQK;ALNDTTK;NYLEQVNVPTK;EDIAR;VATLVINLENK;VDNIEEFLEEK;VDSL GQAPTLK;RDVTK;VK;QDIR;TLETK;VDQILELLEK;QNAVLAK;LQVPVK;EEVK;PANK;PENKK;                                                                                                                                                                                                                                                         |
| PhaP         | METK;PYELVDAFWK;NWSQSLSLFSSAGK;QLEQLTLETTLK;QQQDALHK;LTSGVDELEK;ELQQLTAQFNNQYTDYVK;QLTGNSLNDQINWQDK;WK;ELSAHMHQLTVSPTK;TSLSILTQTSQGFEETTK;QFIVQQLQR;EEAQK;QLEGFLEEFK;SK;QLELAKK;FEENSK;NLFTSIK;                                                                                                                                                                                                                                                |

<sup>a</sup>Peptide sequences and tryptic fragments of PHB biosynthesis proteins predicted from the respective

genes in the annotated genome of *B. cereus* tsu1

<sup>b</sup>The 2D gels is data result from LC-MS (Q-TOF). Regions marked in green are the trptic peptides identified in the recombinant proteins using the liquid chromatography mass spectrometry analysis.

Table S4 HPLC analysis of purity of poly-(R)-3-hydroxybutyrate (PHB) extracts from *Bacillus cereus* tsu1<sup>a</sup>

| Samples (replicates) | Mass of sample weighted out (mg) | Peak area (PHB) | Predicated mg of PHB in original extracts | % of PHB in samples (mg PHB/mg TSS*100) <sup>b</sup> |
|----------------------|----------------------------------|-----------------|-------------------------------------------|------------------------------------------------------|
| HL2                  | 3.50                             | 2034.10         | 3.37                                      | 96.30                                                |
| HL4                  | 3.07                             | 1654.00         | 2.75                                      | 89.50                                                |
| HL6                  | 2.36                             | 1238.80         | 2.06                                      | 87.50                                                |
| Average              |                                  |                 |                                           | 91.1± 4.3 %                                          |

<sup>a</sup>Each PHB was extracted from 20 mg dried bacterial cells;

<sup>b</sup>TSS: total suspended solids

Table S6 The peak positions at known vibrational modes for poly-(R)-3-hydroxybutyrate (PHB) produced by *Bacillus cereus* tsu1 on rapeseed cake substrates<sup>a</sup>

| Vibrational mode                                  | Raman Peak position (cm <sup>-1</sup> ) | FTIR peak position (cm <sup>-1</sup> ) |
|---------------------------------------------------|-----------------------------------------|----------------------------------------|
| C-O-C deformation + C-CH <sub>3</sub> deformation | 363.1                                   | Not in IR range                        |
| CCO deformation                                   | 434.3                                   | Not in IR range                        |
| C-CH <sub>3</sub> deformation and CCO deformation | 513.9                                   | Not in IR range                        |
| C-CH <sub>3</sub> deformation and CCO deformation | 601.6                                   | Not in IR range                        |
| C=O deformation (out-of-plane)                    | 681.1                                   | Not in IR range                        |
| C=O deformation (in-plane)                        | 694.8                                   | Not in IR range                        |

|                                                          |         |         |
|----------------------------------------------------------|---------|---------|
| C-COO stretching                                         | 840.1   | 826.03  |
| ?                                                        | 897.7   | 895.34  |
| ?                                                        | 908.7   | No peak |
| ?                                                        | 938.8   | 937.8   |
| ?                                                        | 947.0   | No peak |
|                                                          | 979.9   | 978.8   |
| ?                                                        | No peak | 1043.9  |
| C-O stretching                                           | 1059.5  | 1054.9  |
| COC symmetric stretching                                 | 1103.3  | 1100.2  |
| CH <sub>3</sub> asymmetric rocking                       | 1136.2  | 1130.8  |
| ?                                                        | No peak | 1181.6  |
| COC asymmetric stretching                                | 1221.2  | 1227.5  |
| C-O-C stretching and CH deformation                      | 1262.3  | 1261.6  |
|                                                          | No peak | 1276.5  |
| CH deformation                                           | 1298    | No peak |
| CH deformation and CH <sub>3</sub> symmetric deformation | 1363.8  | No peak |
| ?                                                        | No peak | 1379.23 |
| CH <sub>3</sub> symmetric deformation                    | 1402.2  |         |
| ?                                                        | 1413.1  | No peak |
| CH <sub>3</sub> asymmetric deformation                   | 1451.5  | 1452.9  |
| C=O stretching                                           | 1731.2  | 1719.23 |



|                                          |        |         |
|------------------------------------------|--------|---------|
| CH stretching                            | 2880.2 | No peak |
| ?                                        | 2900.7 | No peak |
| CH <sub>3</sub> antisymmetric stretching | 2935.4 | 2934.3  |
| CH <sub>3</sub> asymmetric stretching    | 2976.6 | 2976.7  |
| CH <sub>3</sub> asymmetric stretching    | 3002.9 | No peak |

<sup>a</sup>A majority of the vibrational modes in PHB are asymmetric, therefore they can be observed both in the FTIR as well as in the Raman spectra. Same peaks were observed on PHB standard (Sigma).

**Table S7 *Bacillus cereus* tsu1 genes for cellulose degradation and PHB biosynthesis.**

| Function                     | Protein Name                                        | Scaffold location                            | GenBank ID/locus_tag   |
|------------------------------|-----------------------------------------------------|----------------------------------------------|------------------------|
| <b>Cellulose degradation</b> |                                                     |                                              |                        |
|                              | Name=Endoglucanase C                                | BCtsu1_scaffold16_size198830_9489..10395     | KGT42715.1/ IY08_17770 |
|                              | Name=Endoglucanase (chitosanase)                    | BCtsu1_scaffold13_size480439_95775..97104    | KGT43479.1/ IY08_13235 |
|                              | Name=Oligo-1,6-glucosidase                          | BCtsu1_scaffold17_size1101109_314793..316469 | KGT41541.1/ IY08_20275 |
|                              | Name=Bifunctional xylanase/deacetylase              | BCtsu1_scaffold10_size252322_32315..33019    | KGT44235.1/ IY08_08835 |
| <b>PHB biosynthesis</b>      |                                                     |                                              |                        |
|                              | Name=Acetyl-CoA acetyltransferase (PhaA)            | BCtsu1_scaffold19_size558666_390769..391950  | KGT41140.1/ IY08_26925 |
|                              | Name=Acetyl-CoA acetyltransferase (PhaA)            | BCtsu1_scaffold17_size1101109_322327..323502 | KGT41550.1/ IY08_20320 |
|                              | Name=3-hydroxybutyryl-CoA dehydratase (PhaJ)        | BCtsu1_scaffold9_size945600_549735..550178   | KGT44860.1/ IY08_06430 |
|                              | Name=PhaP_Bmeg                                      | BCtsu1_scaffold9_size945600_550280..550804   | KGT44861.1/ IY08_06435 |
|                              | Name=PadR (PhaQ)                                    | BCtsu1_scaffold9_size945600_550847..551299   | KGT44862.1/ IY08_06440 |
|                              | Name=PhaR protein (PhaC synthase subunit )          | BCtsu1_scaffold9_size945600_551498..551980   | KGT44863.1/ IY08_06445 |
|                              | Name=Acetoacetyl-CoA reductase (PhaB)               | BCtsu1_scaffold9_size945600_552131..552874   | KGT44864.1/ IY08_06450 |
|                              | Name=poly(R)-hydroxyalkanoic acid synthase (PhaC)   | BCtsu1_scaffold9_size945600_552958..554043   | KGT44865.1/ IY08_06455 |
|                              | Name= Glutamate dehydrogenase                       | BCtsu1_scaffold9_size945600_706717..708003   | KGT44639.1/ IY08_07350 |
|                              | Name=Glutamate decarboxylase                        | BCtsu1_scaffold5_size27344_7346..8815        | KGT45792.1/ IY08_01265 |
|                              | Name=GABA transaminase                              | BCtsu1_scaffold7_size212786_39367..40731     | KGT45608.1/ IY08_01640 |
|                              | Name=SSA dehydrogenase                              | BCtsu1_scaffold7_size212786_42207..43658     | KGT45610.1/ IY08_01650 |
|                              | Name= Gamma-hydroxybutyric acid (GHB) dehydrogenase | BCtsu1_scaffold17_size1101109_327528..328304 | KGT41557.1/ IY08_20360 |
|                              | Name=Co-enzyme A transferase enzyme                 | BCtsu1_scaffold10_size252162_53175..54689    | KGT44257.1/ IY08_08955 |
|                              | Name=Acyl-CoA dehydrogenase                         | BCtsu1_scaffold19_size558666_388664..389794  | KGT41138.1/ IY08_26915 |

Figure S1

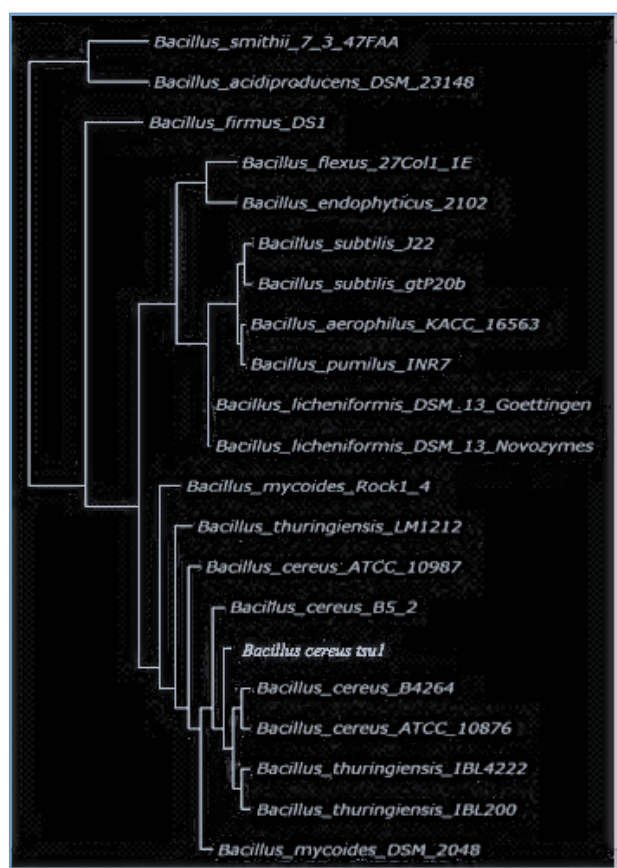

Figure S2

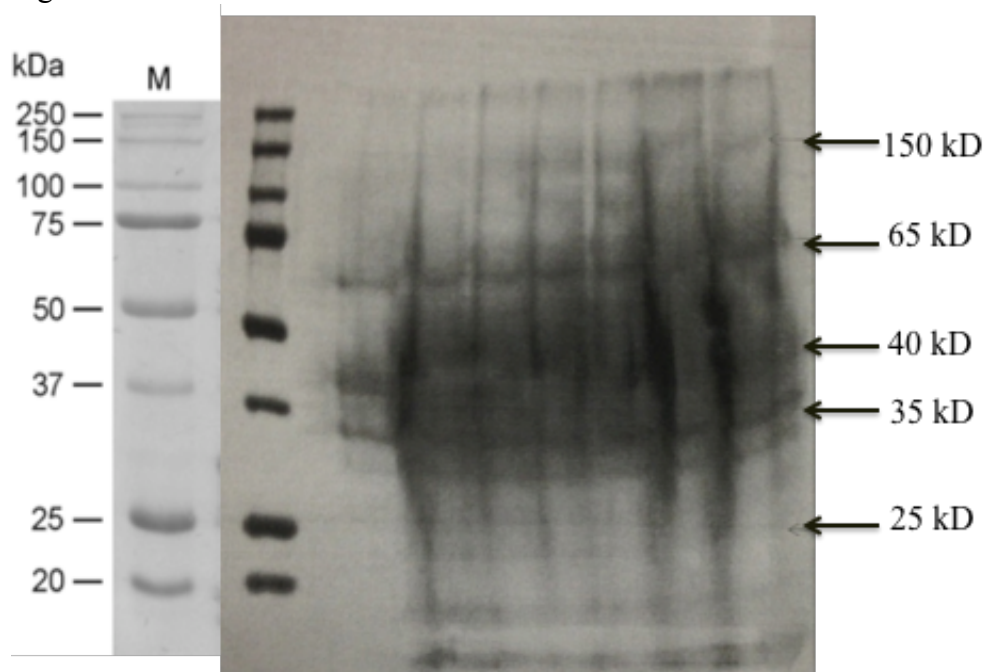

Figure S3

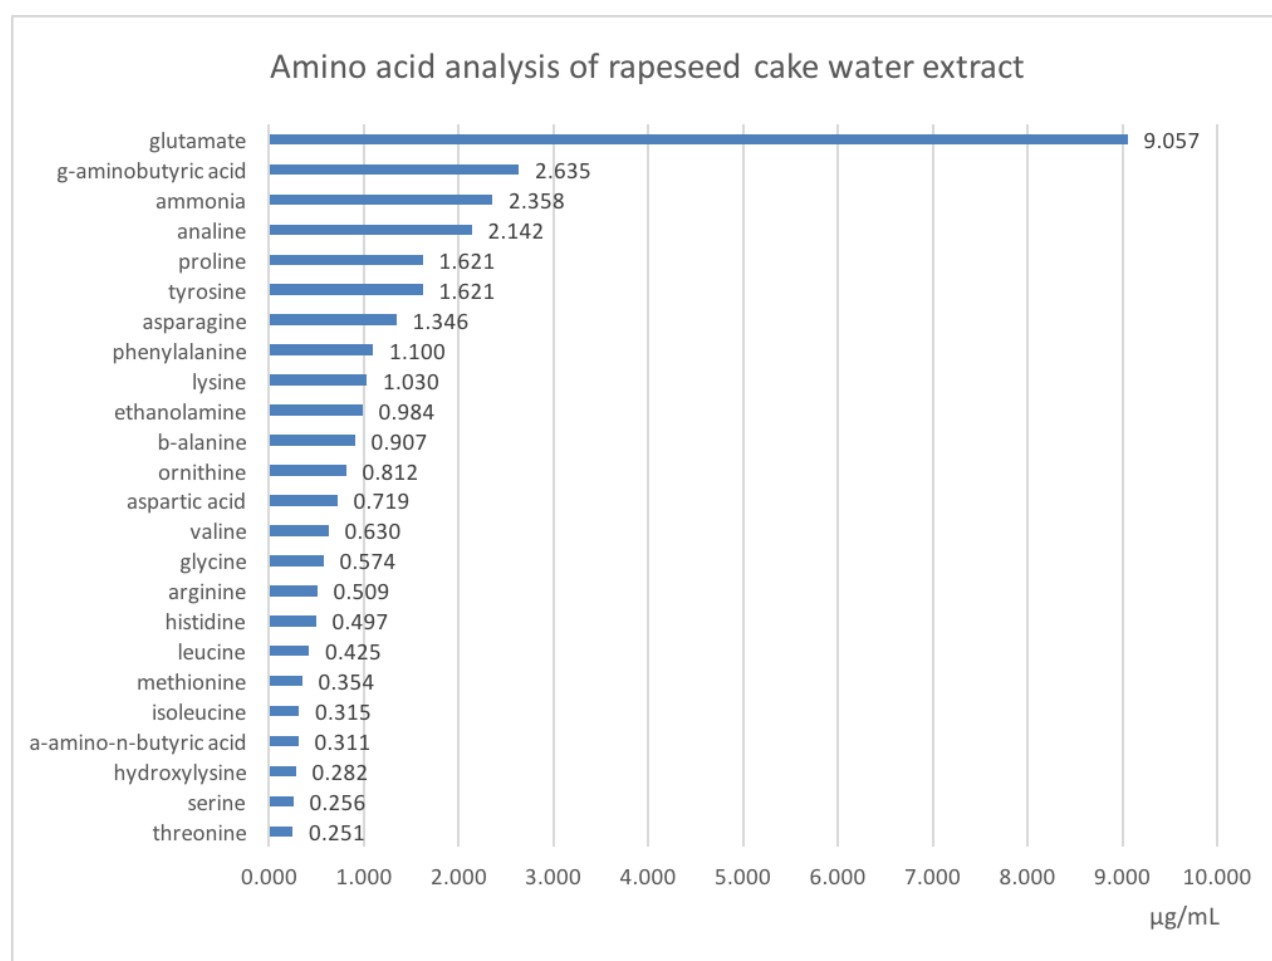

The diagram illustrates the metabolic pathways for the synthesis of P3HB, P4HB, and co-polymers. The pathways are as follows:

- Glycolysis** leads to **Pyruvate**.
- Pyruvate** is converted to **Acetyl-CoA**.
- Acetyl-CoA** enters the **TCA** cycle.
- Acetyl-CoA** is also converted to **Acetoacetyl-CoA** (step 1).
- Acetoacetyl-CoA** is converted to **R-3-HB-CoA** (step 2).
- R-3-HB-CoA** is converted to **P3HB, P4HB, co-polymers** (step 3).
- Acetoacetyl-CoA** is also converted to **Acyl-CoA**.
- Acyl-CoA** is converted to **Crotonyl-CoA** (step 10).
- Crotonyl-CoA** is converted to **R-3-HB-CoA** (step 11).
- Alpha-KG** is converted to **Glutamate** (step 4).
- Glutamate** is converted to **GABA** (step 5).
- GABA** is converted to **SSA** (step 6).
- SSA** is converted to **4-HB** (step 8).
- 4-HB** is converted to **4-HB-CoA** (step 9).
- 4-HB-CoA** is converted to **P3HB, P4HB, co-polymers** (step 3).
- Succinyl-CoA** is converted to **SSA** (step 7).

Table S1 Genome assembled scaffolds used for creating circular genome map of *Bacillus cereus* tsu1

The 36 scaffolds were annotated using the NCBI Prokaryotic Genome Annotation Pipeline GenBank: KN321896-KN321931).

This table shows the localizations of annotated genes on these scaffolds and on the reconstructed circular map

|           | On circular map |       | On NCBI scaffolds |       | Annotation on original scaffold |                                                           |                       |
|-----------|-----------------|-------|-------------------|-------|---------------------------------|-----------------------------------------------------------|-----------------------|
|           | start           | stop  | start             | stop  |                                 |                                                           |                       |
| scaffold1 |                 |       |                   |       |                                 |                                                           |                       |
| gene      | 122             | 1096  | 122               | 1096  | gene=IY08_00005                 | protein=hypothetical protein                              | protein_id=KGT46009.1 |
| gene      | 1340            | 2803  | 1340              | 2803  | gene=IY08_00010                 | protein=inosine-5-monophosphate dehydrogenase             | protein_id=KGT46010.1 |
| gene      | 2908            | 4224  | 2908              | 4224  | gene=IY08_00015                 | protein=D-alanyl-D-alanine carboxypeptidase               | protein_id=KGT46011.1 |
| gene      | 4385            | 5272  | 4385              | 5272  | gene=IY08_00020                 | protein=pyridoxal biosynthesis protein                    | protein_id=KGT46012.1 |
| gene      | 5291            | 5881  | 5291              | 5881  | gene=IY08_00025                 | protein=glutamine amidotransferase                        | protein_id=KGT46013.1 |
| gene      | 6209            | 7483  | 6209              | 7483  | gene=IY08_00030                 | protein=seryl-tRNA synthetase                             | protein_id=KGT46014.1 |
| gene      | 7638            | 7730  | 7638              | 7730  | tRNA                            |                                                           |                       |
| gene      | 7897            | 8289  | 7897              | 8289  | gene=IY08_00040                 | protein=cytoplasmic protein                               | protein_id=KGT46015.1 |
| gene      | 8325            | 8993  | 8325              | 8993  | gene=IY08_00045                 | protein=deoxycytidine kinase                              | protein_id=KGT46016.1 |
| gene      | 8996            | 9631  | 8996              | 9631  | gene=IY08_00050                 | protein=deoxyguanosine kinase                             | protein_id=KGT46017.1 |
| gene      | 9757            | 10296 | 9757              | 10296 | gene=IY08_00055                 | protein=isochorismatase                                   | protein_id=KGT46018.1 |
| gene      | 10274           | 10413 | 10274             | 10413 | pseudo                          |                                                           |                       |
| gene      | 10406           | 10906 | 10406             | 10906 | gene=IY08_00065                 | protein=adenosine deaminase                               | protein_id=KGT46019.1 |
| gene      | 11383           | 13071 | 11383             | 13071 | gene=IY08_00070                 | protein=DNA polymerase III subunit gamma                  |                       |
| gene      | 13094           | 13423 | 13094             | 13423 | gene=IY08_00075                 | protein=nucleoid-associated protein                       | protein_id=KGT46021.1 |
| gene      | 13438           | 14034 | 13438             | 14034 | gene=IY08_00080                 | protein=recombinase RecR                                  | protein_id=KGT46022.1 |
| gene      | 14049           | 14270 | 14049             | 14270 | gene=IY08_00085                 | protein=hypothetical protein                              | protein_id=KGT46023.1 |
| gene      | 14432           | 14701 | 14432             | 14701 | gene=IY08_00090                 | protein=sigma-K factor-processing regulatory protein BofA | protein_id=KGT46024.1 |
| scaffold2 |                 |       |                   |       |                                 |                                                           |                       |
| gene      | 14941           | 14974 | 1                 | 34    | 5s rRNA                         |                                                           |                       |
| gene      | 15223           | 15402 | 283               | 462   | gene=IY08_00100                 | protein=carnitine--CoA ligase                             | protein_id=KGT45959.1 |
| gene      | 15474           | 16895 | 534               | 1955  | gene=IY08_00105                 | protein=arginine decarboxylase                            | protein_id=KGT45960.1 |
| gene      | 16897           | 17523 | 1957              | 2583  | gene=IY08_00110                 | protein=thymidylate kinase                                | protein_id=KGT45961.1 |
| gene      | 17559           | 18542 | 2619              | 3602  | gene=IY08_00115                 | protein=DNA polymerase III subunit delta'                 | protein_id=KGT45962.1 |
| gene      | 18548           | 19375 | 3608              | 4435  | gene=IY08_00120                 | protein=stage 0 sporulation protein                       | protein_id=KGT45963.1 |

|      |       |       |       |       |                 |                                                          |                       |
|------|-------|-------|-------|-------|-----------------|----------------------------------------------------------|-----------------------|
| gene | 19390 | 19740 | 4450  | 4800  | gene=IY08_00125 | protein=DNA replication initiation control protein YabA  | protein_id=KGT45964.1 |
| gene | 19823 | 20563 | 4883  | 5623  | gene=IY08_00130 | protein=hypothetical protein                             | protein_id=KGT45965.1 |
| gene | 20550 | 20840 | 5610  | 5900  | gene=IY08_00135 | protein=hypothetical protein                             | protein_id=KGT45966.1 |
| gene | 20809 | 21684 | 5869  | 6744  | gene=IY08_00140 | protein=16S rRNA methyltransferase                       | protein_id=KGT45967.1 |
| gene | 21705 | 21989 | 6765  | 7049  | gene=IY08_00145 | protein=transition state regulator Abh                   | protein_id=KGT45968.1 |
| gene | 22475 | 24457 | 7535  | 9517  | gene=IY08_00150 | protein=methionine--tRNA ligase                          | protein_id=KGT45969.1 |
| gene | 24624 | 29450 | 9684  | 14510 | gene=IY08_00155 | protein=hydrolase TatD                                   | protein_id=KGT45970.1 |
| gene | 25606 | 26163 | 10666 | 11223 | gene=IY08_00160 | protein=ribonuclease M5                                  | protein_id=KGT45971.1 |
| gene | 26160 | 27038 | 11220 | 12098 | gene=IY08_00165 | protein=16S rRNA methyltransferase                       | protein_id=KGT45972.1 |
| gene | 27149 | 28012 | 12209 | 13072 | gene=IY08_00170 | protein=peptidase                                        | protein_id=KGT45973.1 |
| gene | 28238 | 28498 | 13298 | 13558 | gene=IY08_00175 | protein=ABC transporter permease                         | protein_id=KGT45974.1 |
| gene | 28611 | 28769 | 13671 | 13829 | gene=IY08_00180 | protein=protein sspF                                     | protein_id=KGT45975.1 |
| gene | 28957 | 29835 | 14017 | 14895 | gene=ipk        | protein=4-diphosphocytidyl-2C-methyl-D-erythritol kinase | protein_id=KGT45976.1 |
| gene | 29890 | 30738 | 14950 | 15798 | gene=IY08_00190 | protein=pur operon repressor                             | protein_id=KGT45977.1 |
| gene | 30858 | 31232 | 15918 | 16292 | gene=IY08_00195 | protein=endoribonuclease L-PSP                           | protein_id=KGT45978.1 |
| gene | 31385 | 31678 | 16445 | 16738 | gene=IY08_00200 | protein=septation protein spoVG                          | protein_id=KGT45979.1 |
| gene | 31991 | 33370 | 17051 | 18430 | gene=IY08_00205 | protein=glucosamine-1-phosphate N-acetyltransferase      | protein_id=KGT45980.1 |
| gene | 33392 | 34345 | 18452 | 19405 | gene=IY08_00210 | protein=ribose-phosphate pyrophosphokinase               | protein_id=KGT45981.1 |
| gene | 34355 | 34978 | 19415 | 20038 | gene=IY08_00215 | protein=peptidyl-tRNA hydrolase                          | protein_id=KGT45982.1 |
| gene | 35049 | 35273 | 20109 | 20333 | gene=IY08_00220 | protein=peptide ABC transporter permease                 | protein_id=KGT45983.1 |
| gene | 35379 | 38909 | 20439 | 23969 | gene=IY08_00225 | protein=transcription-repair coupling factor             | protein_id=KGT45984.1 |
| gene | 39046 | 39582 | 24106 | 24642 | gene=IY08_00230 | protein=stage VI sporulation protein D                   | protein_id=KGT45985.1 |
| gene | 39813 | 41414 | 24873 | 26474 | gene=IY08_00235 | protein=sugar transporter                                | protein_id=KGT45986.1 |
| gene | 41427 | 42887 | 26487 | 27947 | gene=IY08_00240 | protein=hypothetical protein                             | protein_id=KGT45987.1 |
| gene | 42902 | 43177 | 27962 | 28237 | gene=IY08_00245 | protein=hypothetical protein                             | protein_id=KGT45988.1 |
| gene | 43236 | 43544 | 28296 | 28604 | gene=IY08_00250 | protein=spore coat protein                               | protein_id=KGT45989.1 |
| gene | 43541 | 44194 | 28601 | 29254 | gene=IY08_00255 | protein=spore cortex biosynthesis protein                | protein_id=KGT45990.1 |
| gene | 44191 | 44550 | 29251 | 29610 | gene=IY08_00260 | protein=cell division protein DIVIC                      | protein_id=KGT45991.1 |
| gene | 44638 | 45123 | 29698 | 30183 | gene=IY08_00265 | protein=RNA-binding protein                              | protein_id=KGT45992.1 |
| gene | 45283 | 45356 | 30343 | 30416 | tRNA            |                                                          |                       |
| gene | 45370 | 45441 | 30430 | 30501 | tRNA            |                                                          |                       |

|           |       |       |       |       |                 |                                                                             |                       |
|-----------|-------|-------|-------|-------|-----------------|-----------------------------------------------------------------------------|-----------------------|
| gene      | 45701 | 48172 | 30761 | 33232 | gene=IY08_00280 | protein=stage II sporulation protein E                                      | protein_id=KGT45993.1 |
| gene      | 48403 | 49833 | 33463 | 34893 | gene=IY08_00285 | protein=tRNA(Ile)-lysine synthetase                                         | protein_id=KGT45994.1 |
| gene      | 49830 | 50372 | 34890 | 35432 | gene=IY08_00290 | protein=hypoxanthine phosphoribosyltransferase                              | protein_id=KGT45995.1 |
| gene      | 50458 | 52359 | 35518 | 37419 | gene=IY08_00295 | protein=cell division protein FtsH                                          | protein_id=KGT45996.1 |
| gene      | 52604 | 53392 | 37664 | 38452 | gene=IY08_00300 | protein=pantothenate kinase                                                 | protein_id=KGT45997.1 |
| gene      | 53399 | 54274 | 38459 | 39334 | gene=IY08_00305 | protein=heat shock protein Hsp33                                            | protein_id=KGT45998.1 |
| gene      | 54388 | 55311 | 39448 | 40371 | gene=IY08_00310 | protein=cysteine synthase                                                   | protein_id=KGT45999.1 |
| gene      | 55534 | 56931 | 40594 | 41991 | gene=IY08_00315 | protein=aminobenzoate synthetase                                            | protein_id=KGT46000.1 |
| gene      | 56937 | 57524 | 41997 | 42584 | gene=IY08_00320 | protein=anthranilate synthase component II                                  | protein_id=KGT46001.1 |
| gene      | 57518 | 58390 | 42578 | 43450 | gene=IY08_00325 | protein=4-amino-4-deoxychorismate lyase                                     | protein_id=KGT46002.1 |
| gene      | 58365 | 59225 | 43425 | 44285 | gene=IY08_00330 | protein=dihydropteroate synthase                                            | protein_id=KGT46003.1 |
| gene      | 59226 | 59588 | 44286 | 44648 | gene=IY08_00335 | protein=dihydroneopterin aldolase                                           | protein_id=KGT46004.1 |
| gene      | 59585 | 60100 | 44645 | 45160 | gene=IY08_00340 | protein=2-amino-4-hydroxy-6-hydroxymethyldihydropteridine pyrophosphokinase | protein_id=KGT46005.1 |
| gene      | 60052 | 60255 | 45112 | 45315 | gene=IY08_00345 | protein=XRE family transcriptional regulator                                | protein_id=KGT46006.1 |
| gene      | 60279 | 61277 | 45339 | 46337 | gene=IY08_00350 | protein=tRNA-dihydrouridine synthase                                        | protein_id=KGT46007.1 |
| gene      | 61437 | 62936 | 46497 | 47996 | gene=IY08_00355 | protein=lysyl-tRNA synthetase                                               | protein_id=KGT46008.1 |
| scaffold3 |       |       |       |       |                 |                                                                             |                       |
| gene      | 63662 | 64123 | 302   | 763   | gene=IY08_00375 | protein=CtsR family transcriptional regulator                               | protein_id=KGT45885.1 |
| gene      | 64294 | 64842 | 934   | 1482  | gene=IY08_00380 | protein=hypothetical protein                                                | protein_id=KGT45886.1 |
| gene      | 64847 | 65911 | 1487  | 2551  | gene=IY08_00385 | protein=ATP:guanido phosphotransferase                                      | protein_id=KGT45887.1 |
| gene      | 65934 | 68369 | 2574  | 5009  | gene=IY08_00390 | protein=Clp protease ClpX                                                   | protein_id=KGT45888.1 |
| gene      | 68465 | 69841 | 5105  | 6481  | gene=IY08_00395 | protein=DNA repair protein RadA                                             | protein_id=KGT45889.1 |
| gene      | 69845 | 70918 | 6485  | 7558  | gene=IY08_00400 | protein=DNA integrity scanning protein DisA                                 | protein_id=KGT45890.1 |
| gene      | 71079 | 72188 | 7719  | 8828  | gene=IY08_00405 | protein=hypothetical protein                                                | protein_id=KGT45891.1 |
| gene      | 72205 | 72885 | 8845  | 9525  | gene=IY08_00410 | protein=2-C-methyl-D-erythritol 4-phosphate cytidyltransferase              | protein_id=KGT45892.1 |
| gene      | 73002 | 73478 | 9642  | 10118 | gene=IY08_00415 | protein=2-C-methyl-D-erythritol 2,4-cyclodiphosphate                        | protein_id=KGT45893.1 |
| gene      | 73568 | 75025 | 10208 | 11665 | gene=IY08_00420 | protein=glutamyl-tRNA synthetase                                            | protein_id=KGT45894.1 |
| gene      | 75470 | 76135 | 12110 | 12775 | gene=IY08_00425 | protein=serine acetyltransferase                                            | protein_id=KGT45895.1 |
| gene      | 76116 | 77513 | 12756 | 14153 | gene=IY08_00430 | protein=cysteinyl-tRNA synthetase                                           | protein_id=KGT45896.1 |



|      |        |        |       |       |                 |                                                   |                       |
|------|--------|--------|-------|-------|-----------------|---------------------------------------------------|-----------------------|
| gene | 77516  | 77923  | 14156 | 14563 | gene=IY08_00435 | protein=ribonuclease III                          | protein_id=KGT45897.1 |
| gene | 77920  | 78663  | 14560 | 15303 | gene=IY08_00440 | protein=RNA methyltransferase                     | protein_id=KGT45898.1 |
| gene | 78667  | 79179  | 15307 | 15819 | gene=IY08_00445 | protein=hypothetical protein                      | protein_id=KGT45899.1 |
| gene | 79247  | 79906  | 15887 | 16546 | gene=IY08_00450 | protein=RNA polymerase factor sigma-70            | protein_id=KGT45900.1 |
| gene | 80043  | 80189  | 16683 | 16829 | gene=IY08_00455 | protein=50S ribosomal protein L33                 | protein_id=KGT45901.1 |
| gene | 80222  | 80401  | 16862 | 17041 | gene=IY08_00460 | protein=preprotein translocase subunit SecE       | protein_id=KGT45902.1 |
| gene | 80533  | 81066  | 17173 | 17706 | gene=IY08_00465 | protein=antitermination protein NusG              | protein_id=KGT45903.1 |
| gene | 81234  | 81659  | 17874 | 18299 | gene=IY08_00470 | protein=50S ribosomal protein L11                 | protein_id=KGT45904.1 |
| gene | 81836  | 82528  | 18476 | 19168 | gene=IY08_00475 | protein=50S ribosomal protein L1                  | protein_id=KGT45905.1 |
| gene | 82762  | 83262  | 19402 | 19902 | gene=IY08_00480 | protein=50S ribosomal protein L10                 | protein_id=KGT45906.1 |
| gene | 83330  | 83689  | 19970 | 20329 | gene=rplL       | protein=50S ribosomal protein L7/L12              | protein_id=KGT45907.1 |
| gene | 83766  | 84365  | 20406 | 21005 | gene=IY08_00490 | protein=16S rRNA methyltransferase                | protein_id=KGT45908.1 |
| gene | 84657  | 88190  | 21297 | 24830 | gene=IY08_00495 | protein=DNA-directed RNA polymerase subunit beta  | protein_id=KGT45909.1 |
| gene | 88228  | 91839  | 24868 | 28479 | gene=IY08_00500 | protein=DNA-directed RNA polymerase subunit beta' | protein_id=KGT45910.1 |
| gene | 91953  | 92201  | 28593 | 28841 | gene=IY08_00505 | protein=50S ribosomal protein L7                  | protein_id=KGT45911.1 |
| gene | 92316  | 92738  | 28956 | 29378 | gene=IY08_00510 | protein=30S ribosomal protein S12                 | protein_id=KGT45912.1 |
| gene | 92768  | 93238  | 29408 | 29878 | gene=IY08_00515 | protein=30S ribosomal protein S7                  | protein_id=KGT45913.1 |
| gene | 93447  | 95525  | 30087 | 32165 | gene=fusA       | protein=elongation factor G                       | protein_id=KGT45914.1 |
| gene | 95643  | 96830  | 32283 | 33470 | gene=tuf        | protein=elongation factor Tu                      | protein_id=KGT45915.1 |
| gene | 97231  | 97539  | 33871 | 34179 | gene=IY08_00530 | protein=30S ribosomal protein S10                 | protein_id=KGT45916.1 |
| gene | 97574  | 98206  | 34214 | 34846 | gene=IY08_00535 | protein=50S ribosomal protein L3                  | protein_id=KGT45917.1 |
| gene | 98232  | 98855  | 34872 | 35495 | gene=IY08_00540 | protein=50S ribosomal protein L4                  | protein_id=KGT45918.1 |
| gene | 98855  | 99145  | 35495 | 35785 | gene=IY08_00545 | protein=50S ribosomal protein L23                 | protein_id=KGT45919.1 |
| gene | 99174  | 100004 | 35814 | 36644 | gene=rplB       | protein=50S ribosomal protein L2                  | protein_id=KGT45920.1 |
| gene | 100065 | 100343 | 36705 | 36983 | gene=IY08_00555 | protein=30S ribosomal protein S19                 | protein_id=KGT45921.1 |
| gene | 100361 | 100702 | 37001 | 37342 | gene=IY08_00560 | protein=50S ribosomal protein L22                 | protein_id=KGT45922.1 |
| gene | 100706 | 101365 | 37346 | 38005 | gene=IY08_00565 | protein=30S ribosomal protein S3                  | protein_id=KGT45923.1 |
| gene | 101367 | 101801 | 38007 | 38441 | gene=IY08_00570 | protein=50S ribosomal protein L16                 | protein_id=KGT45924.1 |
| gene | 101791 | 101991 | 38431 | 38631 | gene=IY08_00575 | protein=50S ribosomal protein L29                 | protein_id=KGT45925.1 |
| gene | 102012 | 102275 | 38652 | 38915 | gene=IY08_00580 | protein=30S ribosomal protein S17                 | protein_id=KGT45926.1 |
| gene | 102319 | 102687 | 38959 | 39327 | gene=IY08_00585 | protein=50S ribosomal protein L14                 | protein_id=KGT45927.1 |

|      |        |        |       |       |                 |                                                   |                       |
|------|--------|--------|-------|-------|-----------------|---------------------------------------------------|-----------------------|
| gene | 102726 | 103037 | 39366 | 39677 | gene=IY08_00590 | protein=50S ribosomal protein L24                 | protein_id=KGT45928.1 |
| gene | 103064 | 103603 | 39704 | 40243 | gene=IY08_00595 | protein=50S ribosomal protein L5                  | protein_id=KGT45929.1 |
| gene | 103637 | 103822 | 40277 | 40462 | gene=rpsN       | protein=30S ribosomal protein S14                 | protein_id=KGT45930.1 |
| gene | 103852 | 104250 | 40492 | 40890 | gene=IY08_00605 | protein=30S ribosomal protein S8                  | protein_id=KGT45931.1 |
| gene | 104283 | 104822 | 40923 | 41462 | gene=IY08_00610 | protein=50S ribosomal protein L6                  | protein_id=KGT45932.1 |
| gene | 104854 | 105216 | 41494 | 41856 | gene=IY08_00615 | protein=50S ribosomal protein L18                 | protein_id=KGT45933.1 |
| gene | 105238 | 105738 | 41878 | 42378 | gene=IY08_00620 | protein=30S ribosomal protein S5                  | protein_id=KGT45934.1 |
| gene | 105752 | 105934 | 42392 | 42574 | gene=IY08_00625 | protein=50S ribosomal protein L30                 | protein_id=KGT45935.1 |
| gene | 105968 | 106408 | 42608 | 43048 | gene=IY08_00630 | protein=50S ribosomal protein L15                 | protein_id=KGT45936.1 |
| gene | 106408 | 107709 | 43048 | 44349 | gene=IY08_00635 | protein=preprotein translocase subunit SecY       | protein_id=KGT45937.1 |
| gene | 107766 | 108416 | 44406 | 45056 | gene=IY08_00640 | protein=adenylate kinase                          | protein_id=KGT45938.1 |
| gene | 108416 | 109162 | 45056 | 45802 | gene=IY08_00645 | protein=methionine aminopeptidase                 | protein_id=KGT45939.1 |
| gene | 109231 | 109449 | 45871 | 46089 | gene=infA       | protein=translation initiation factor IF-1        | protein_id=KGT45940.1 |
| gene | 109485 | 109598 | 46125 | 46238 | gene=rpmJ       | protein=50S ribosomal protein L36                 | protein_id=KGT45941.1 |
| gene | 109620 | 109985 | 46260 | 46625 | gene=IY08_00660 | protein=30S ribosomal protein S13                 | protein_id=KGT45942.1 |
| gene | 110010 | 110399 | 46650 | 47039 | gene=IY08_00665 | protein=30S ribosomal protein S11                 | protein_id=KGT45943.1 |
| gene | 110580 | 111524 | 47220 | 48164 | gene=IY08_00670 | protein=DNA-directed RNA polymerase subunit alpha | protein_id=KGT45944.1 |
| gene | 111560 | 111922 | 48200 | 48562 | gene=IY08_00675 | protein=50S ribosomal protein L17                 | protein_id=KGT45945.1 |
| gene | 112026 | 112868 | 48666 | 49508 | gene=cbiO       | protein=cobalt transporter ATP-binding subunit    | protein_id=KGT45946.1 |
| gene | 112844 | 113725 | 49484 | 50365 | gene=cbiO       | protein=cobalt transporter ATP-binding subunit    | protein_id=KGT45947.1 |
| gene | 113713 | 114507 | 50353 | 51147 | gene=IY08_00690 | protein=cobalt ABC transporter permease           | protein_id=KGT45948.1 |
| gene | 114507 | 115265 | 51147 | 51905 | gene=IY08_00695 | protein=tRNA pseudouridine synthase A             | protein_id=KGT45949.1 |
| gene | 115418 | 115855 | 52058 | 52495 | gene=IY08_00700 | protein=50S ribosomal protein L13                 | protein_id=KGT45950.1 |
| gene | 115877 | 116269 | 52517 | 52909 | gene=IY08_00705 | protein=30S ribosomal protein S9                  | protein_id=KGT45951.1 |
| gene | 116431 | 116859 | 53071 | 53499 | gene=IY08_00710 | protein=KINB signaling pathway activation protein | protein_id=KGT45952.1 |
| gene | 116926 | 117639 | 53566 | 54279 | gene=IY08_00715 | protein=N-acetylmuramoyl-L-alanine amidase        | protein_id=KGT45953.1 |
| gene | 117785 | 118849 | 54425 | 55489 | gene=IY08_00720 | protein=chromosome partitioning protein ParA      | protein_id=KGT45954.1 |
| gene | 119011 | 119628 | 55651 | 56268 | gene=IY08_00725 | protein=spore germination protein GerD            | protein_id=KGT45955.1 |
| gene | 119768 | 120379 | 56408 | 57019 | gene=IY08_00730 | protein=KINB signaling pathway activation protein | protein_id=KGT45956.1 |
| gene | 120497 | 121261 | 57137 | 57901 | gene=IY08_00735 | protein=polysaccharide deacetylase                | protein_id=KGT45957.1 |
| gene | 121432 | 121650 | 58072 | 58290 | gene=IY08_00740 | protein=hypothetical protein                      | protein_id=KGT45958.1 |

|           |        |        |       |       |                 |                                                           |                       |
|-----------|--------|--------|-------|-------|-----------------|-----------------------------------------------------------|-----------------------|
| gene      | 121872 | 123347 | 58512 | 59987 | 16S rRNA        |                                                           |                       |
| scaffold4 |        |        |       |       |                 |                                                           |                       |
| gene      | 123510 | 123582 | 8     | 79    | tRNA            |                                                           |                       |
| gene      | 123428 | 123499 | 90    | 162   | tRNA            |                                                           |                       |
| gene      | 123700 | 124845 | 280   | 1425  | gene=IY08_00760 | protein=glycerate kinase                                  | protein_id=KGT45802.1 |
| gene      | 125056 | 125949 | 1636  | 2529  | gene=IY08_00765 | protein=arginase                                          | protein_id=KGT45803.1 |
| gene      | 126198 | 127019 | 2778  | 3599  | gene=IY08_00770 | protein=membrane protein                                  | protein_id=KGT45804.1 |
| gene      | 127012 | 128499 | 3592  | 5079  | gene=IY08_00775 | protein=hypothetical protein                              | protein_id=KGT45805.1 |
| gene      | 128492 | 129838 | 5072  | 6418  | gene=IY08_00780 | protein=phosphoglucosamine mutase                         | protein_id=KGT45806.1 |
| gene      | 130127 | 130312 | 6707  | 6892  | gene=IY08_00785 | protein=hypothetical protein                              | protein_id=KGT45807.1 |
| gene      | 130325 | 132127 | 6905  | 8707  | gene=IY08_00790 | protein=glucosamine--fructose-6-phosphate                 | protein_id=KGT45808.1 |
| gene      | 132266 | 133381 | 8846  | 9961  | gene=IY08_00795 | protein=membrane protein                                  | protein_id=KGT45809.1 |
| gene      | 133982 | 135946 | 10562 | 12526 | gene=IY08_00800 | protein=peptidase S9                                      | protein_id=KGT45810.1 |
| gene      | 136054 | 136620 | 12634 | 13200 | gene=IY08_00805 | protein=hypothetical protein                              | protein_id=KGT45811.1 |
| gene      | 136693 | 137199 | 13273 | 13779 | gene=IY08_00810 | protein=DoxX                                              | protein_id=KGT45812.1 |
| gene      | 137595 | 138371 | 14175 | 14951 | gene=IY08_00815 | protein=3-ketoacyl-ACP reductase                          | protein_id=KGT45813.1 |
| gene      | 138410 | 139078 | 14990 | 15658 | gene=IY08_00820 | protein=metal ABC transporter permease                    | protein_id=KGT45814.1 |
| gene      | 139053 | 140093 | 15633 | 16673 | gene=IY08_00825 | protein=methionine ABC transporter ATP-binding protein    | protein_id=KGT45815.1 |
| gene      | 140106 | 140918 | 16686 | 17498 | gene=IY08_00830 | protein=dioxygenase                                       | protein_id=KGT45816.1 |
| gene      | 141198 | 142106 | 17778 | 18686 | gene=IY08_00835 | protein=NADPH:quinone reductase                           | protein_id=KGT45817.1 |
| gene      | 142264 | 143028 | 18844 | 19608 | gene=IY08_00840 | protein=lipoprotein                                       | protein_id=KGT45818.1 |
| gene      | 143095 | 144531 | 19675 | 21111 | gene=IY08_00845 | protein=FAD-binding protein                               | protein_id=KGT45819.1 |
| gene      | 144528 | 145061 | 21108 | 21641 | gene=IY08_00850 | protein=MFS transporter                                   | protein_id=KGT45820.1 |
| gene      | 145140 | 146858 | 21720 | 23438 | gene=IY08_00855 | protein=hypothetical protein                              | protein_id=KGT45821.1 |
| gene      | 147039 | 148235 | 23619 | 24815 | gene=IY08_00860 | protein=MFS transporter                                   | protein_id=KGT45822.1 |
| gene      | 148497 | 149000 | 25077 | 25580 | gene=IY08_00865 | protein=lipoprotein                                       | protein_id=KGT45823.1 |
| gene      | 149048 | 149515 | 25628 | 26095 | gene=IY08_00870 | protein=hypothetical protein                              | protein_id=KGT45824.1 |
| gene      | 149688 | 150587 | 26268 | 27167 | gene=IY08_00875 | protein=transcriptional regulator                         | protein_id=KGT45825.1 |
| gene      | 150606 | 150797 | 27186 | 27377 | gene=IY08_00880 | protein=hypothetical protein                              | protein_id=KGT45826.1 |
| gene      | 150794 | 151144 | 27374 | 27724 | gene=IY08_00885 | protein=hypothetical protein                              | protein_id=KGT45827.1 |
| gene      | 151185 | 152825 | 27765 | 29405 | gene=IY08_00890 | protein=peptide ABC transporter substrate-binding protein | protein_id=KGT45828.1 |

|      |        |        |       |       |                 |                                                           |                       |
|------|--------|--------|-------|-------|-----------------|-----------------------------------------------------------|-----------------------|
| gene | 153230 | 154870 | 29810 | 31450 | gene=IY08_00895 | protein=peptide ABC transporter substrate-binding protein | protein_id=KGT45829.1 |
| gene | 155260 | 156093 | 31840 | 32673 | gene=IY08_00900 | protein=glyoxal reductase                                 | protein_id=KGT45830.1 |
| gene | 156095 | 156898 | 32675 | 33478 | gene=IY08_00905 | protein=pyrroline-5-carboxylate reductase                 | protein_id=KGT45831.1 |
| gene | 157184 | 158035 | 33764 | 34615 | gene=IY08_00910 | protein=glucose transporter GlcU                          | protein_id=KGT45832.1 |
| gene | 158336 | 159010 | 34916 | 35590 | gene=IY08_00915 | protein=molybdenum ABC transporter permease               | protein_id=KGT45833.1 |
| gene | 159016 | 159822 | 35596 | 36402 | gene=IY08_00920 | protein=molybdenum ABC transporter substrate-binding      | protein_id=KGT45834.1 |
| gene | 159983 | 160903 | 36563 | 37483 | gene=IY08_00925 | protein=hypothetical protein                              | protein_id=KGT45835.1 |
| gene | 160969 | 161070 | 37549 | 37650 | gene=IY08_00930 | protein=hypothetical protein                              | protein_id=KGT45836.1 |
| gene | 161083 | 161184 | 37663 | 37764 | gene=IY08_00935 | protein=hypothetical protein                              | protein_id=KGT45837.1 |
| gene | 161325 | 162191 | 37905 | 38771 | gene=IY08_00940 | protein=LysR family transcriptional regulator             | protein_id=KGT45838.1 |
| gene | 162319 | 163287 | 38899 | 39867 | gene=IY08_00945 | protein=transporter                                       | protein_id=KGT45839.1 |
| gene | 163309 | 163449 | 39889 | 40029 | gene=IY08_00950 | protein=hypothetical protein                              | protein_id=KGT45840.1 |
| gene | 163618 | 163719 | 40198 | 40299 | gene=IY08_00960 | protein=hypothetical protein                              | protein_id=KGT45841.1 |
| gene | 163943 | 164548 | 40523 | 41128 | gene=IY08_00965 | protein=acyl-phosphate glycerol 3-phosphate               | protein_id=KGT45842.1 |
| gene | 164729 | 164830 | 41309 | 41410 | gene=IY08_00975 | protein=hypothetical protein                              | protein_id=KGT45843.1 |
| gene | 165022 | 165999 | 41602 | 42579 | gene=IY08_00980 | protein=LacI family transcriptional regulator             | protein_id=KGT45844.1 |
| gene | 166160 | 166489 | 42740 | 43069 | gene=IY08_00985 | protein=translation initiation factor, aIF-2BI            | protein_id=KGT45845.1 |
| gene | 166608 | 167444 | 43188 | 44024 | gene=IY08_00990 | protein=membrane protein YxkD                             | protein_id=KGT45846.1 |
| gene | 167583 | 167939 | 44163 | 44519 | gene=IY08_00995 | protein=ferrichrome ABC transporter permease              | protein_id=KGT45847.1 |
| gene | 168505 | 168618 | 45085 | 45198 | gene=IY08_01000 | protein=iron ABC transporter permease                     | protein_id=KGT45848.1 |
| gene | 168678 | 169442 | 45258 | 46022 | gene=IY08_01005 | protein=DNAase                                            | protein_id=KGT45849.1 |
| gene | 169559 | 171208 | 46139 | 47788 | gene=IY08_01010 | protein=hypothetical protein                              | protein_id=KGT45850.1 |
| gene | 171448 | 171978 | 48028 | 48558 | gene=IY08_01015 | protein=invasion protein                                  | protein_id=KGT45851.1 |
| gene | 172146 | 172940 | 48726 | 49520 | gene=IY08_01020 | protein=galactose-1-phosphate uridylyltransferase         | protein_id=KGT45852.1 |
| gene | 173077 | 173205 | 49657 | 49785 | gene=IY08_01025 | protein=Spore coat protein B                              | protein_id=KGT45853.1 |
| gene | 173627 | 173761 | 50207 | 50341 | gene=IY08_01030 | protein=hypothetical protein                              | protein_id=KGT45854.1 |
| gene | 173886 | 175766 | 50466 | 52346 | gene=IY08_01035 | protein=ABC transporter ATP-binding protein               | protein_id=KGT45855.1 |
| gene | 176158 | 176355 | 52738 | 52935 | gene=IY08_01040 | protein=hypothetical protein                              | protein_id=KGT45856.1 |
| gene | 176981 | 178708 | 53561 | 55288 | gene=IY08_01045 | protein=ABC transporter substrate-binding protein         | protein_id=KGT45857.1 |
| gene | 178812 | 179768 | 55392 | 56348 | gene=IY08_01050 | protein=diguanylate cyclase                               | protein_id=KGT45858.1 |
| gene | 179781 | 180701 | 56361 | 57281 | gene=IY08_01055 | protein=peptide ABC transporter permease                  | protein_id=KGT45859.1 |

|           |        |        |       |       |                 |                                                                    |                       |
|-----------|--------|--------|-------|-------|-----------------|--------------------------------------------------------------------|-----------------------|
| gene      | 180712 | 181692 | 57292 | 58272 | gene=IY08_01060 | protein=peptide ABC transporter ATP-binding protein                | protein_id=KGT45860.1 |
| gene      | 181689 | 182654 | 58269 | 59234 | gene=IY08_01065 | protein=peptide ABC transporter substrate-binding protein          | protein_id=KGT45861.1 |
| gene      | 182689 | 183561 | 59269 | 60141 | gene=IY08_01070 | protein=HAD family hydrolase                                       | protein_id=KGT45862.1 |
| gene      | 184002 | 184109 | 60582 | 60689 | gene=IY08_01080 | protein=fatty acid desaturase                                      | protein_id=KGT45863.1 |
| gene      | 184153 | 184260 | 60733 | 60840 | gene=IY08_01085 | protein=fatty acid desaturase                                      | protein_id=KGT45864.1 |
| gene      | 184400 | 184507 | 60980 | 61087 | gene=IY08_01095 | protein=fatty acid desaturase                                      | protein_id=KGT45884.1 |
| gene      | 184542 | 184661 | 61122 | 61241 | gene=IY08_01100 | protein=fatty acid desaturase                                      | protein_id=KGT45865.1 |
| gene      | 185055 | 186173 | 61635 | 62753 | gene=IY08_01105 | protein=4-hydroxyphenylpyruvate dioxygenase                        | protein_id=KGT45866.1 |
| gene      | 186240 | 187196 | 62820 | 63776 | gene=IY08_01110 | protein=fumarylacetoacetase                                        | protein_id=KGT45867.1 |
| gene      | 187162 | 188334 | 63742 | 64914 | gene=IY08_01115 | protein=homogentisate 1,2-dioxygenase                              | protein_id=KGT45868.1 |
| gene      | 188567 | 189982 | 65147 | 66562 | gene=IY08_01120 | protein=amino acid permease                                        | protein_id=KGT45869.1 |
| gene      | 190091 | 191362 | 66671 | 67942 | gene=IY08_01125 | protein=MFS transporter                                            | protein_id=KGT45870.1 |
| gene      | 191591 | 192676 | 68171 | 69256 | gene=ddl        | protein=D-alanine--D-alanine ligase                                | protein_id=KGT45871.1 |
| gene      | 192739 | 194115 | 69319 | 70695 | gene=IY08_01135 | protein=UDP-N-acetylmuramoyl-tripeptide--D-alanyl-D-alanine ligase | protein_id=KGT45872.1 |
| gene      | 194421 | 196022 | 71001 | 72602 | gene=IY08_01140 | protein=DEAD/DEAH box helicase                                     | protein_id=KGT45873.1 |
| gene      | 196118 | 197080 | 72698 | 73660 | gene=IY08_01145 | protein=UV damage repair endonuclease UvdE                         | protein_id=KGT45874.1 |
| gene      | 197073 | 197645 | 73653 | 74225 | gene=IY08_01150 | protein=rhomboid family protein                                    | protein_id=KGT45875.1 |
| gene      | 197739 | 198098 | 74319 | 74678 | gene=IY08_01155 | protein=4'-phosphopantetheinyl transferase                         | protein_id=KGT45876.1 |
| gene      | 198255 | 199205 | 74835 | 75785 | gene=IY08_01160 | protein=sporulation protein                                        | protein_id=KGT45877.1 |
| gene      | 199323 | 200492 | 75903 | 77072 | gene=IY08_01165 | protein=alanine racemase                                           | protein_id=KGT45878.1 |
| gene      | 200801 | 201088 | 77381 | 77668 | gene=IY08_01170 | protein=antitoxin endoai                                           | protein_id=KGT45879.1 |
| gene      | 201093 | 201443 | 77673 | 78023 | gene=IY08_01175 | protein=PemK family transcriptional regulator                      | protein_id=KGT45880.1 |
| gene      | 201511 | 203679 | 78091 | 80259 | gene=IY08_01180 | protein=hypothetical protein                                       | protein_id=KGT45881.1 |
| gene      | 203737 | 203853 | 80317 | 80433 | gene=IY08_01185 | protein=hypothetical protein                                       | protein_id=KGT45882.1 |
| gene      | 204049 | 204507 | 80629 | 81087 | gene=IY08_01190 | protein=hypothetical protein                                       | protein_id=KGT45883.1 |
| gene      | 204621 | 204695 | 81201 | 81275 | tRNA            |                                                                    |                       |
| scaffold5 |        |        |       |       |                 |                                                                    |                       |
| gene      | 204721 | 204921 | 1     | 201   | gene=IY08_01200 | protein=transposase                                                | protein_id=KGT45785.1 |
| gene      | 205268 | 205864 | 548   | 1144  | gene=IY08_01205 | protein=ABC transporter permease                                   | protein_id=KGT45786.1 |
| gene      | 206164 | 206436 | 1444  | 1716  | pseudo          |                                                                    |                       |

|           |        |        |       |       |                 |                                                     |                       |
|-----------|--------|--------|-------|-------|-----------------|-----------------------------------------------------|-----------------------|
| gene      | 206831 | 207109 | 2111  | 2389  | gene=IY08_01220 | protein=AbrB family transcriptional regulator       | protein_id=KGT45787.1 |
| gene      | 207536 | 207775 | 2816  | 3055  | gene=IY08_01225 | protein=transcriptional regulator                   | protein_id=KGT45788.1 |
| gene      | 208755 | 209065 | 4035  | 4345  | pseudo          |                                                     |                       |
| gene      | 209535 | 210095 | 4815  | 5375  | gene=IY08_01235 | protein=spore coat protein                          | protein_id=KGT45789.1 |
| gene      | 210960 | 211346 | 6240  | 6626  | gene=IY08_01250 | protein=hypothetical protein                        | protein_id=KGT45790.1 |
| gene      | 211520 | 211792 | 6800  | 7072  | gene=IY08_01255 | protein=DNA-binding protein                         | protein_id=KGT45791.1 |
| gene      | 212066 | 213535 | 7346  | 8815  | gene=IY08_01265 | protein=glutamate decarboxylase                     | protein_id=KGT45792.1 |
| gene      | 214854 | 215258 | 10134 | 10538 | gene=IY08_01270 | protein=hypothetical protein                        | protein_id=KGT45793.1 |
| gene      | 215510 | 216007 | 10790 | 11287 | pseudo          |                                                     |                       |
| gene      | 216545 | 216894 | 11825 | 12174 | pseudo          |                                                     |                       |
| gene      | 216916 | 217428 | 12196 | 12708 | gene=IY08_01285 | protein=hypothetical protein                        | protein_id=KGT45794.1 |
| gene      | 217647 | 218519 | 12927 | 13799 | gene=IY08_01290 | protein=hypothetical protein                        | protein_id=KGT45795.1 |
| gene      | 219043 | 219789 | 14323 | 15069 | gene=IY08_01300 | protein=hypothetical protein                        | protein_id=KGT45796.1 |
| gene      | 220083 | 220508 | 15363 | 15788 | gene=IY08_01305 | protein=hypothetical protein                        | protein_id=KGT45797.1 |
| gene      | 220719 | 221099 | 15999 | 16379 | pseudo          |                                                     |                       |
| gene      | 221638 | 221947 | 16918 | 17227 | pseudo          |                                                     |                       |
| gene      | 222244 | 223890 | 17524 | 19170 | gene=IY08_01320 | protein=cell wall hydrolase                         | protein_id=KGT45798.1 |
| gene      | 225524 | 227137 | 20804 | 22417 | gene=IY08_01325 | protein=N-acetylmuramoyl-L-alanine amidase          | protein_id=KGT45799.1 |
| gene      | 227388 | 228064 | 22668 | 23344 | pseudo          |                                                     |                       |
| gene      | 230190 | 230591 | 25470 | 25871 | gene=IY08_01345 | protein=beta-lactamase repressor                    | protein_id=KGT45800.1 |
| gene      | 230881 | 232064 | 26161 | 27344 | gene=IY08_01355 | protein=beta-lactamase regulatory protein           | partial=3'            |
| scaffold6 |        |        |       |       |                 |                                                     |                       |
| gene      | 232082 | 232158 | 2     | 78    | tRNA            |                                                     |                       |
| gene      | 232162 | 232237 | 82    | 157   | tRNA            |                                                     |                       |
| gene      | 232412 | 232885 | 332   | 805   | gene=IY08_01370 | protein=ATP-binding protein                         | protein_id=KGT45771.1 |
| gene      | 232866 | 233558 | 786   | 1478  | gene=IY08_01375 | protein=hypothetical protein                        | protein_id=KGT45772.1 |
| gene      | 233572 | 234015 | 1492  | 1935  | gene=IY08_01380 | protein=alanine acetyltransferase                   | protein_id=KGT45773.1 |
| gene      | 234015 | 235031 | 1935  | 2951  | gene=IY08_01385 | protein=O-sialoglycoprotein endopeptidase           | protein_id=KGT45774.1 |
| gene      | 235516 | 237495 | 3436  | 5415  | gene=IY08_01390 | protein=ABC transporter ATP-binding protein         | protein_id=KGT45775.1 |
| gene      | 237629 | 238258 | 5549  | 6178  | gene=IY08_01395 | protein=redox-sensing transcriptional repressor Rex | protein_id=KGT45776.1 |
| gene      | 238288 | 238479 | 6208  | 6399  | gene=IY08_01400 | protein=lipoprotein                                 | protein_id=KGT45777.1 |

|           |        |        |       |       |                 |                                                                   |                       |
|-----------|--------|--------|-------|-------|-----------------|-------------------------------------------------------------------|-----------------------|
| gene      | 238476 | 239225 | 6396  | 7145  | gene=IY08_01405 | protein=peptidase                                                 | protein_id=KGT45778.1 |
| gene      | 239617 | 239901 | 7537  | 7821  | gene=IY08_01410 | protein=chaperonin                                                | protein_id=KGT45779.1 |
| gene      | 239940 | 241574 | 7860  | 9494  | gene=groEL      | protein=molecular chaperone GroEL                                 | protein_id=KGT45780.1 |
| gene      | 241972 | 243519 | 9892  | 11439 | gene=IY08_01420 | protein=GMP synthase                                              | protein_id=KGT45781.1 |
| gene      | 243905 | 245230 | 11825 | 13150 | gene=IY08_01425 | protein=guanine permease                                          | protein_id=KGT45782.1 |
| gene      | 245374 | 246075 | 13294 | 13995 | gene=IY08_01430 | protein=DeoR family transcriptional regulator                     | protein_id=KGT45783.1 |
| gene      | 246059 | 247564 | 13979 | 15484 | gene=IY08_01435 | protein=histidine kinase                                          | protein_id=KGT45784.1 |
| scaffold7 |        |        |       |       |                 |                                                                   |                       |
| gene      | 247921 | 247954 | 1     | 34    | 5s rRNA         |                                                                   |                       |
| gene      | 248742 | 249227 | 822   | 1307  | gene=IY08_01445 | protein=N5-carboxyaminoimidazole ribonucleotide mutase            | protein_id=KGT45572.1 |
| gene      | 249224 | 250375 | 1304  | 2455  | gene=IY08_01450 | protein=phosphoribosylaminoimidazole carboxylase                  | protein_id=KGT45573.1 |
| gene      | 250372 | 251679 | 2452  | 3759  | gene=IY08_01455 | protein=adenylosuccinate lyase                                    | protein_id=KGT45574.1 |
| gene      | 251768 | 252487 | 3848  | 4567  | gene=IY08_01460 | protein=phosphoribosylaminoimidazole-succinocarboxamide synthase  | protein_id=KGT45575.1 |
| gene      | 252480 | 252734 | 4560  | 4814  | gene=IY08_01465 | protein=phosphoribosylformylglycinamide synthase                  | protein_id=KGT45576.1 |
| gene      | 252731 | 253414 | 4811  | 5494  | gene=IY08_01470 | protein=phosphoribosylformylglycinamide synthase                  | protein_id=KGT45577.1 |
| gene      | 253398 | 255617 | 5478  | 7697  | gene=IY08_01475 | protein=phosphoribosylformylglycinamide synthase                  | protein_id=KGT45578.1 |
| gene      | 255602 | 257017 | 7682  | 9097  | gene=IY08_01480 | protein=amidophosphoribosyltransferase                            | protein_id=KGT45579.1 |
| gene      | 257123 | 258163 | 9203  | 10243 | gene=IY08_01485 | protein=phosphoribosylaminoimidazole synthetase                   | protein_id=KGT45580.1 |
| gene      | 258160 | 258747 | 10240 | 10827 | gene=IY08_01490 | protein=phosphoribosylglycinamide formyltransferase               | protein_id=KGT45581.1 |
| gene      | 258772 | 260307 | 10852 | 12387 | gene=purH       | protein=phosphoribosylaminoimidazolecarboxamide formyltransferase | protein_id=KGT45582.1 |
| gene      | 260572 | 261843 | 12652 | 13923 | gene=IY08_01500 | protein=phosphoribosylamine--glycine ligase                       | protein_id=KGT45583.1 |
| gene      | 261880 | 262044 | 13960 | 14124 | gene=IY08_01505 | protein=ribbon-helix-helix domain protein                         | protein_id=KGT45584.1 |
| gene      | 262060 | 262905 | 14140 | 14985 | gene=IY08_01510 | protein=membrane protein                                          | protein_id=KGT45585.1 |
| gene      | 263125 | 263502 | 15205 | 15582 | gene=IY08_01515 | protein=MarR family transcriptional regulator                     | protein_id=KGT45586.1 |
| gene      | 263661 | 263774 | 15741 | 15854 | gene=IY08_01525 | protein=hypothetical protein                                      | protein_id=KGT45770.1 |
| gene      | 263840 | 264529 | 15920 | 16609 | gene=IY08_01530 | protein=heptaprenylglyceryl phosphate synthase                    | protein_id=KGT45587.1 |
| gene      | 264542 | 266791 | 16622 | 18871 | gene=IY08_01535 | protein=ATP-dependent DNA helicase PcrA                           | protein_id=KGT45588.1 |
| gene      | 266807 | 268816 | 18887 | 20896 | gene=ligA       | protein=NAD-dependent DNA ligase LigA                             | protein_id=KGT45589.1 |
| gene      | 268833 | 270029 | 20913 | 22109 | gene=IY08_01545 | protein=hypothetical protein                                      | protein_id=KGT45590.1 |

|      |        |        |       |       |                 |                                                       |                       |
|------|--------|--------|-------|-------|-----------------|-------------------------------------------------------|-----------------------|
| gene | 270126 | 270896 | 22206 | 22976 | gene=IY08_01550 | protein=membrane protein                              | protein_id=KGT45591.1 |
| gene | 271050 | 272597 | 23130 | 24677 | gene=IY08_01555 | protein=1-pyrroline-5-carboxylate dehydrogenase       | protein_id=KGT45592.1 |
| gene | 272868 | 273413 | 24948 | 25493 | gene=IY08_01560 | protein=isochorismatase                               | protein_id=KGT45593.1 |
| gene | 273886 | 274905 | 25966 | 26985 | gene=IY08_01565 | protein=phosphate ABC transporter ATP-binding protein | protein_id=KGT45594.1 |
| gene | 274895 | 275560 | 26975 | 27640 | gene=IY08_01570 | protein=ABC transporter permease                      | protein_id=KGT45595.1 |
| gene | 275582 | 276436 | 27662 | 28516 | gene=IY08_01575 | protein=methionine ABC transporter substrate-binding  | protein_id=KGT45596.1 |
| gene | 276601 | 277068 | 28681 | 29148 | gene=IY08_01580 | protein=hypothetical protein                          | protein_id=KGT45597.1 |
| gene | 277130 | 277321 | 29210 | 29401 | gene=IY08_01585 | protein=hypothetical protein                          | protein_id=KGT45598.1 |
| gene | 277314 | 278492 | 29394 | 30572 | gene=IY08_01590 | protein=arsenic ABC transporter ATPase                | protein_id=KGT45599.1 |
| gene | 278572 | 279054 | 30652 | 31134 | gene=IY08_01595 | protein=MarR family transcriptional regulator         | protein_id=KGT45600.1 |
| gene | 279286 | 279522 | 31366 | 31602 | gene=IY08_01600 | protein=hypothetical protein                          | protein_id=KGT45601.1 |
| gene | 279664 | 279954 | 31744 | 32034 | gene=IY08_01605 | protein=glutamyl-tRNA amidotransferase                | protein_id=KGT45602.1 |
| gene | 279970 | 281427 | 32050 | 33507 | gene=gatA       | protein=glutamyl-tRNA amidotransferase                | protein_id=KGT45603.1 |
| gene | 281442 | 282869 | 33522 | 34949 | gene=IY08_01615 | protein=glutamyl-tRNA amidotransferase                | protein_id=KGT45604.1 |
| gene | 283428 | 284333 | 35508 | 36413 | gene=IY08_01620 | protein=lipid kinase                                  | protein_id=KGT45605.1 |
| gene | 285111 | 286241 | 37191 | 38321 | gene=IY08_01630 | protein=transposase                                   | protein_id=KGT45606.1 |
| gene | 286389 | 287132 | 38469 | 39212 | gene=IY08_01635 | protein=haloacid dehalogenase                         | protein_id=KGT45607.1 |
| gene | 287287 | 288651 | 39367 | 40731 | gene=IY08_01640 | protein=4-aminobutyrate aminotransferase              | protein_id=KGT45608.1 |
| gene | 288767 | 290134 | 40847 | 42214 | gene=IY08_01645 | protein=RNA polymerase subunit sigma-54               | protein_id=KGT45609.1 |
| gene | 290127 | 291578 | 42207 | 43658 | gene=gabD       | protein=succinate-semialdehyde dehydrogenase          | protein_id=KGT45610.1 |
| gene | 291626 | 291949 | 43706 | 44029 | gene=IY08_01655 | protein=DNA mismatch repair protein MutS              | protein_id=KGT45611.1 |
| gene | 292082 | 292573 | 44162 | 44653 | gene=IY08_01660 | protein=hypothetical protein                          | protein_id=KGT45612.1 |
| gene | 292619 | 293848 | 44699 | 45928 | gene=IY08_01665 | protein=peptidase M29                                 | protein_id=KGT45613.1 |
| gene | 293965 | 295047 | 46045 | 47127 | gene=IY08_01670 | protein=polysaccharide deacetylase                    | protein_id=KGT45614.1 |
| gene | 295584 | 296291 | 47664 | 48371 | gene=IY08_01680 | protein=hypothetical protein                          | protein_id=KGT45615.1 |
| gene | 296337 | 297533 | 48417 | 49613 | gene=IY08_01685 | protein=pyrimidine nucleoside transporter NupC        | protein_id=KGT45616.1 |
| gene | 297959 | 299335 | 50039 | 51415 | gene=IY08_01690 | protein=RNA methyltransferase                         | protein_id=KGT45617.1 |
| gene | 299497 | 300486 | 51577 | 52566 | gene=IY08_01695 | protein=tRNA-dihydrouridine synthase                  | protein_id=KGT45618.1 |
| gene | 300838 | 301356 | 52918 | 53436 | gene=IY08_01700 | protein=cytoplasmic protein                           | protein_id=KGT45619.1 |
| gene | 301451 | 302158 | 53531 | 54238 | gene=IY08_01705 | protein=zinc protease                                 | protein_id=KGT45620.1 |
| gene | 302399 | 303094 | 54479 | 55174 | gene=IY08_01710 | protein=benzoate transporter                          | protein_id=KGT45621.1 |



|      |        |        |       |       |                 |                                                    |                       |
|------|--------|--------|-------|-------|-----------------|----------------------------------------------------|-----------------------|
| gene | 303109 | 304218 | 55189 | 56298 | gene=IY08_01715 | protein=mandelate racemase                         | protein_id=KGT45622.1 |
| gene | 304312 | 305583 | 56392 | 57663 | gene=IY08_01720 | protein=transcriptional regulator                  | protein_id=KGT45623.1 |
| gene | 305572 | 306993 | 57652 | 59073 | gene=IY08_01725 | protein=sodium:proton antiporter                   | protein_id=KGT45624.1 |
| gene | 307287 | 308402 | 59367 | 60482 | gene=IY08_01730 | protein=amidohydrolase                             | protein_id=KGT45625.1 |
| gene | 308637 | 309242 | 60717 | 61322 | gene=IY08_01735 | protein=SAM-dependent methyltransferase            | protein_id=KGT45626.1 |
| gene | 309276 | 310802 | 61356 | 62882 | gene=IY08_01740 | protein=NADH dehydrogenase                         | protein_id=KGT45627.1 |
| gene | 310817 | 311380 | 62897 | 63460 | gene=IY08_01745 | protein=alkyl hydroperoxide reductase              | protein_id=KGT45628.1 |
| gene | 311972 | 313201 | 64052 | 65281 | gene=IY08_01750 | protein=5-methylthioribose kinase                  | protein_id=KGT45629.1 |
| gene | 313211 | 314257 | 65291 | 66337 | gene=IY08_01755 | protein=methylthioribose-1-phosphate isomerase     | protein_id=KGT45630.1 |
| gene | 314311 | 314952 | 66391 | 67032 | gene=IY08_01760 | protein=fucose phosphate aldolase                  | protein_id=KGT45631.1 |
| gene | 314997 | 316004 | 67077 | 68084 | gene=IY08_01765 | protein=iron ABC transporter permease              | protein_id=KGT45632.1 |
| gene | 316001 | 317041 | 68081 | 69121 | gene=IY08_01770 | protein=iron ABC transporter                       | protein_id=KGT45633.1 |
| gene | 317090 | 318007 | 69170 | 70087 | gene=IY08_01775 | protein=ABC transporter substrate-binding protein  | protein_id=KGT45634.1 |
| gene | 318050 | 318316 | 70130 | 70396 | gene=IY08_01780 | protein=hypothetical protein                       | protein_id=KGT45635.1 |
| gene | 318341 | 319390 | 70421 | 71470 | gene=IY08_01785 | protein=thioredoxin reductase                      | protein_id=KGT45636.1 |
| gene | 319433 | 319630 | 71513 | 71710 | gene=IY08_01790 | protein=hypothetical protein                       | protein_id=KGT45637.1 |
| gene | 319586 | 319954 | 71666 | 72034 | gene=IY08_01795 | protein=hypothetical protein                       | protein_id=KGT45638.1 |
| gene | 320145 | 320375 | 72225 | 72455 | gene=IY08_01800 | protein=hypothetical protein                       | protein_id=KGT45639.1 |
| gene | 320611 | 321126 | 72691 | 73206 | gene=IY08_01805 | protein=spore coat protein                         | protein_id=KGT45640.1 |
| gene | 321147 | 321596 | 73227 | 73676 | gene=IY08_01810 | protein=spore coat protein                         | protein_id=KGT45641.1 |
| gene | 321758 | 322426 | 73838 | 74506 | gene=IY08_01815 | protein=hypothetical protein                       | protein_id=KGT45642.1 |
| gene | 322666 | 323931 | 74746 | 76011 | gene=IY08_01820 | protein=S-adenosylmethionine decarboxylase related | protein_id=KGT45643.1 |
| gene | 324069 | 325295 | 76149 | 77375 | gene=IY08_01830 | protein=sporulation kinase                         | protein_id=KGT45644.1 |
| gene | 325524 | 325904 | 77604 | 77984 | gene=IY08_01835 | protein=hypothetical protein                       | protein_id=KGT45645.1 |
| gene | 325932 | 326564 | 78012 | 78644 | gene=IY08_01840 | protein=metal-dependent hydrolase                  | protein_id=KGT45646.1 |
| gene | 326911 | 328020 | 78991 | 80100 | gene=IY08_01845 | protein=hypothetical protein                       | protein_id=KGT45647.1 |
| gene | 328132 | 328914 | 80212 | 80994 | gene=IY08_01850 | protein=hypothetical protein                       | protein_id=KGT45648.1 |
| gene | 328928 | 330229 | 81008 | 82309 | gene=IY08_01855 | protein=MFS transporter                            | protein_id=KGT45649.1 |
| gene | 330373 | 331899 | 82453 | 83979 | gene=IY08_01860 | protein=(2Fe-2S)-binding protein                   | protein_id=KGT45650.1 |
| gene | 332481 | 333566 | 84561 | 85646 | gene=IY08_01865 | protein=fatty acid desaturase                      | protein_id=KGT45651.1 |
| gene | 333620 | 334312 | 85700 | 86392 | gene=IY08_01870 | protein=cystine transporter permease               | protein_id=KGT45652.1 |

|      |        |        |        |        |                 |                                                     |                       |
|------|--------|--------|--------|--------|-----------------|-----------------------------------------------------|-----------------------|
| gene | 334419 | 335213 | 86499  | 87293  | gene=IY08_01875 | protein=ABC transporter substrate-binding protein   | protein_id=KGT45653.1 |
| gene | 335336 | 336058 | 87416  | 88138  | gene=IY08_01880 | protein=amino acid ABC transporter ATPase           | protein_id=KGT45654.1 |
| gene | 336269 | 337561 | 88349  | 89641  | gene=IY08_01885 | protein=chemotaxis protein                          | protein_id=KGT45655.1 |
| gene | 337708 | 338157 | 89788  | 90237  | gene=IY08_01890 | protein=ArgR family transcriptional regulator       | protein_id=KGT45656.1 |
| gene | 338426 | 339658 | 90506  | 91738  | gene=IY08_01895 | protein=arginine deiminase                          | protein_id=KGT45657.1 |
| gene | 339689 | 340687 | 91769  | 92767  | gene=IY08_01900 | protein=ornithine carbamoyltransferase              | protein_id=KGT45658.1 |
| gene | 340787 | 342202 | 92867  | 94282  | gene=IY08_01905 | protein=amino acid APC transporter                  | protein_id=KGT45659.1 |
| gene | 342240 | 343202 | 94320  | 95282  | gene=IY08_01910 | protein=carbamate kinase                            | protein_id=KGT45660.1 |
| gene | 343404 | 344093 | 95484  | 96173  | gene=IY08_01915 | protein=Crp/Fnr family transcriptional regulator    | protein_id=KGT45661.1 |
| gene | 344250 | 344933 | 96330  | 97013  | gene=IY08_01920 | protein=hypothetical protein                        | protein_id=KGT45662.1 |
| gene | 345058 | 345675 | 97138  | 97755  | pseudo          |                                                     |                       |
| gene | 345749 | 347413 | 97829  | 99493  | gene=IY08_01930 | protein=oligo-1,6-glucosidase                       | protein_id=KGT45663.1 |
| gene | 347615 | 349252 | 99695  | 101332 | gene=IY08_01935 | protein=PTS system transporter subunit IICB         | protein_id=KGT45664.1 |
| gene | 349257 | 350048 | 101337 | 102128 | gene=IY08_01940 | protein=endonuclease                                | protein_id=KGT45665.1 |
| gene | 350353 | 353214 | 102433 | 105294 | gene=IY08_01945 | protein=phage infection protein                     | protein_id=KGT45666.1 |
| gene | 353255 | 355444 | 105335 | 107524 | gene=IY08_01950 | protein=DNA topoisomerase III                       | protein_id=KGT45667.1 |
| gene | 355852 | 356661 | 107932 | 108741 | gene=IY08_01955 | protein=hydroxyethylthiazole kinase                 | protein_id=KGT45668.1 |
| gene | 356677 | 357336 | 108757 | 109416 | gene=thiE       | protein=thiamine-phosphate pyrophosphorylase        | protein_id=KGT45669.1 |
| gene | 357551 | 358864 | 109631 | 110944 | gene=IY08_01965 | protein=C4-dicarboxylate ABC transporter            | protein_id=KGT45670.1 |
| gene | 359367 | 361109 | 111447 | 113189 | gene=IY08_01970 | protein=chemotaxis protein                          | protein_id=KGT45671.1 |
| gene | 361242 | 364823 | 113322 | 116903 | gene=IY08_01975 | protein=peptide synthetase                          | protein_id=KGT45672.1 |
| gene | 365079 | 365399 | 117159 | 117479 | gene=IY08_01980 | protein=hypothetical protein                        | protein_id=KGT45673.1 |
| gene | 365371 | 366144 | 117451 | 118224 | gene=IY08_01985 | protein=ABC transporter permease                    | protein_id=KGT45674.1 |
| gene | 366141 | 367139 | 118221 | 119219 | gene=IY08_01990 | protein=ABC transporter substrate-binding protein   | protein_id=KGT45675.1 |
| gene | 367136 | 367885 | 119216 | 119965 | gene=IY08_01995 | protein=nitrate ABC transporter ATP-binding protein | protein_id=KGT45676.1 |
| gene | 368523 | 370547 | 120603 | 122627 | gene=IY08_02000 | protein=chitinase                                   | protein_id=KGT45677.1 |
| gene | 370919 | 371290 | 122999 | 123370 | gene=IY08_02005 | protein=molecular chaperone DnaJ                    | protein_id=KGT45678.1 |
| gene | 371301 | 371615 | 123381 | 123695 | gene=IY08_02010 | protein=thioredoxin                                 | protein_id=KGT45679.1 |
| gene | 371629 | 371874 | 123709 | 123954 | gene=IY08_02015 | protein=methanol dehydrogenase                      | protein_id=KGT45680.1 |
| gene | 371999 | 372142 | 124079 | 124222 | gene=IY08_02020 | protein=histidine kinase                            | protein_id=KGT45681.1 |
| gene | 372223 | 372804 | 124303 | 124884 | gene=IY08_02025 | protein=TetR family transcriptional regulator       | protein_id=KGT45682.1 |

|      |        |        |        |        |                 |                                                      |                       |
|------|--------|--------|--------|--------|-----------------|------------------------------------------------------|-----------------------|
| gene | 372871 | 374103 | 124951 | 126183 | gene=IY08_02030 | protein=MFS transporter                              | protein_id=KGT45683.1 |
| gene | 374217 | 374411 | 126297 | 126491 | gene=IY08_02035 | protein=DNA-binding protein                          | protein_id=KGT45684.1 |
| gene | 374481 | 375764 | 126561 | 127844 | gene=IY08_02040 | protein=MFS transporter                              | protein_id=KGT45685.1 |
| gene | 375873 | 377186 | 127953 | 129266 | gene=IY08_02045 | protein=phosphodiesterase                            | protein_id=KGT45686.1 |
| gene | 377341 | 377634 | 129421 | 129714 | gene=IY08_02050 | protein=membrane protein                             | protein_id=KGT45687.1 |
| gene | 377981 | 379411 | 130061 | 131491 | gene=IY08_02055 | protein=proline--tRNA ligase                         | protein_id=KGT45688.1 |
| gene | 379528 | 380373 | 131608 | 132453 | gene=IY08_02060 | protein=cell wall anchor protein                     | protein_id=KGT45689.1 |
| gene | 380572 | 381450 | 132652 | 133530 | gene=IY08_02065 | protein=ROK family transcriptional regulator         | protein_id=KGT45690.1 |
| gene | 381579 | 382175 | 133659 | 134255 | gene=IY08_02070 | protein=stress protein                               | protein_id=KGT45691.1 |
| gene | 382198 | 382782 | 134278 | 134862 | gene=IY08_02075 | protein=chemical-damaging agent resistance protein C | protein_id=KGT45692.1 |
| gene | 382868 | 383446 | 134948 | 135526 | gene=IY08_02080 | protein=chemical-damaging agent resistance protein C | protein_id=KGT45693.1 |
| gene | 383519 | 384310 | 135599 | 136390 | gene=IY08_02085 | protein=membrane protein                             | protein_id=KGT45694.1 |
| gene | 384420 | 386051 | 136500 | 138131 | gene=IY08_02090 | protein=hypothetical protein                         | protein_id=KGT45695.1 |
| gene | 386070 | 387152 | 138150 | 139232 | gene=IY08_02095 | protein=hypothetical protein                         | protein_id=KGT45696.1 |
| gene | 387188 | 389854 | 139268 | 141934 | gene=IY08_02100 | protein=ATPase                                       | protein_id=KGT45697.1 |
| gene | 390047 | 390271 | 142127 | 142351 | gene=IY08_02105 | protein=hypothetical protein                         | protein_id=KGT45698.1 |
| gene | 390446 | 390910 | 142526 | 142990 | gene=IY08_02110 | protein=phosphotyrosine protein phosphatase          | protein_id=KGT45699.1 |
| gene | 390964 | 391479 | 143044 | 143559 | gene=IY08_02115 | protein=hypothetical protein                         | protein_id=KGT45700.1 |
| gene | 391486 | 392352 | 143566 | 144432 | gene=IY08_02120 | protein=ribonuclease BN                              | protein_id=KGT45701.1 |
| gene | 392540 | 394465 | 144620 | 146545 | gene=IY08_02130 | protein=ATPase                                       | protein_id=KGT45702.1 |
| gene | 394737 | 395687 | 146817 | 147767 | gene=IY08_02135 | protein=transporter                                  | protein_id=KGT45703.1 |
| gene | 395808 | 396488 | 147888 | 148568 | gene=IY08_02140 | protein=hypothetical protein                         | protein_id=KGT45704.1 |
| gene | 396666 | 397202 | 148746 | 149282 | gene=IY08_02145 | protein=signal peptidase                             | protein_id=KGT45705.1 |
| gene | 397241 | 400003 | 149321 | 152083 | gene=IY08_02150 | protein=GTP-binding protein                          | protein_id=KGT45706.1 |
| gene | 400491 | 401090 | 152571 | 153170 | gene=IY08_02155 | protein=alkaline phosphatase                         | protein_id=KGT45707.1 |
| gene | 401101 | 401529 | 153181 | 153609 | gene=IY08_02160 | protein=membrane protein                             | protein_id=KGT45708.1 |
| gene | 401739 | 401885 | 153819 | 153965 | gene=IY08_02165 | protein=transporter                                  | protein_id=KGT45709.1 |
| gene | 402041 | 402457 | 154121 | 154537 | gene=IY08_02170 | protein=general stress protein                       | protein_id=KGT45710.1 |
| gene | 402637 | 403692 | 154717 | 155772 | gene=IY08_02175 | protein=cation transporter                           | protein_id=KGT45711.1 |
| gene | 403772 | 404569 | 155852 | 156649 | gene=IY08_02180 | protein=hypothetical protein                         | protein_id=KGT45712.1 |
| gene | 404605 | 405732 | 156685 | 157812 | gene=IY08_02185 | protein=hypothetical protein                         | protein_id=KGT45713.1 |

|      |        |        |        |        |                 |                                                         |                       |
|------|--------|--------|--------|--------|-----------------|---------------------------------------------------------|-----------------------|
| gene | 405946 | 406128 | 158026 | 158208 | gene=IY08_02190 | protein=hypothetical protein                            | protein_id=KGT45714.1 |
| gene | 406331 | 407851 | 158411 | 159931 | gene=IY08_02195 | protein=fumarate hydratase                              | protein_id=KGT45715.1 |
| gene | 407979 | 408761 | 160059 | 160841 | gene=IY08_02200 | protein=polysaccharide deacetylase                      | protein_id=KGT45716.1 |
| gene | 408821 | 409684 | 160901 | 161764 | gene=IY08_02205 | protein=DNA-3-methyladenine glycosylase                 | protein_id=KGT45717.1 |
| gene | 409695 | 411074 | 161775 | 163154 | gene=IY08_02210 | protein=RNA methyltransferase                           | protein_id=KGT45718.1 |
| gene | 411323 | 412216 | 163403 | 164296 | gene=IY08_02215 | protein=S-layer protein                                 | protein_id=KGT45719.1 |
| gene | 412331 | 413068 | 164411 | 165148 | gene=IY08_02220 | protein=tRNA pseudouridine synthase A                   | protein_id=KGT45720.1 |
| gene | 413113 | 413316 | 165193 | 165396 | gene=IY08_02225 | protein=hypothetical protein                            | protein_id=KGT45721.1 |
| gene | 413400 | 414803 | 165480 | 166883 | gene=IY08_02230 | protein=ATPase AAA                                      | protein_id=KGT45722.1 |
| gene | 415097 | 415351 | 167177 | 167431 | gene=IY08_02235 | protein=hypothetical protein                            | protein_id=KGT45723.1 |
| gene | 415458 | 416879 | 167538 | 168959 | gene=IY08_02240 | protein=amino acid permease                             | protein_id=KGT45724.1 |
| gene | 416975 | 418249 | 169055 | 170329 | gene=IY08_02245 | protein=acetylornithine deacetylase                     | protein_id=KGT45725.1 |
| gene | 418349 | 419002 | 170429 | 171082 | gene=IY08_02250 | protein=DNA-binding protein                             | protein_id=KGT45726.1 |
| gene | 419133 | 419744 | 171213 | 171824 | gene=IY08_02255 | protein=membrane protein                                | protein_id=KGT45727.1 |
| gene | 419859 | 420017 | 171939 | 172097 | gene=IY08_02260 | protein=hypothetical protein                            | protein_id=KGT45728.1 |
| gene | 420040 | 420381 | 172120 | 172461 | gene=IY08_02265 | protein=hypothetical protein                            | protein_id=KGT45729.1 |
| gene | 420420 | 420571 | 172500 | 172651 | pseudo          |                                                         |                       |
| gene | 420556 | 421485 | 172636 | 173565 | gene=IY08_02275 | protein=glutaminase                                     | protein_id=KGT45730.1 |
| gene | 421811 | 423313 | 173891 | 175393 | gene=IY08_02280 | protein=PTS N-acetylglucosamine transporter subunit IIB | protein_id=KGT45731.1 |
| gene | 423567 | 424814 | 175647 | 176894 | gene=IY08_02285 | protein=penicillin-binding protein                      | protein_id=KGT45732.1 |
| gene | 424970 | 425371 | 177050 | 177451 | gene=IY08_02290 | protein=hypothetical protein                            | protein_id=KGT45733.1 |
| gene | 425388 | 425582 | 177468 | 177662 | gene=IY08_02295 | protein=hypothetical protein                            | protein_id=KGT45734.1 |
| gene | 425596 | 427140 | 177676 | 179220 | gene=IY08_02300 | protein=glycosyl transferase                            | protein_id=KGT45735.1 |
| gene | 427133 | 428374 | 179213 | 180454 | gene=IY08_02305 | protein=UDP-N-acetyl-D-mannosamine dehydrogenase        | protein_id=KGT45736.1 |
| gene | 428371 | 429336 | 180451 | 181416 | gene=IY08_02310 | protein=NAD-dependent dehydratase                       | protein_id=KGT45737.1 |
| gene | 429329 | 430873 | 181409 | 182953 | gene=IY08_02315 | protein=glycosyl transferase                            | protein_id=KGT45738.1 |
| gene | 430842 | 431063 | 182922 | 183143 | gene=IY08_02320 | protein=hypothetical protein                            | protein_id=KGT45739.1 |
| gene | 431216 | 433465 | 183296 | 185545 | gene=IY08_02325 | protein=formate acetyltransferase                       | protein_id=KGT45740.1 |
| gene | 433535 | 434266 | 185615 | 186346 | gene=IY08_02330 | protein=pyruvate formate lyase-activating protein       | protein_id=KGT45741.1 |
| gene | 434679 | 435845 | 186759 | 187925 | gene=IY08_02335 | protein=diacylglycerol glucosyltransferase              | protein_id=KGT45742.1 |
| gene | 436214 | 436333 | 188294 | 188413 | gene=IY08_02340 | protein=hypothetical protein                            | protein_id=KGT45743.1 |

|           |        |        |        |        |                 |                                                       |                       |
|-----------|--------|--------|--------|--------|-----------------|-------------------------------------------------------|-----------------------|
| gene      | 436443 | 437000 | 188523 | 189080 | gene=IY08_02345 | protein=alanine acetyltransferase                     | protein_id=KGT45744.1 |
| gene      | 437242 | 438372 | 189322 | 190452 | gene=IY08_02350 | protein=amidohydrolase                                | protein_id=KGT45745.1 |
| gene      | 438512 | 439417 | 190592 | 191497 | gene=IY08_02355 | protein=multidrug MFS transporter                     | protein_id=KGT45746.1 |
| gene      | 439499 | 440311 | 191579 | 192391 | gene=IY08_02360 | protein=recombinase RecX                              | protein_id=KGT45747.1 |
| gene      | 440322 | 440639 | 192402 | 192719 | gene=IY08_02365 | protein=hypothetical protein                          | protein_id=KGT45748.1 |
| gene      | 440704 | 440856 | 192784 | 192936 | gene=IY08_02370 | protein=hypothetical protein                          | protein_id=KGT45749.1 |
| gene      | 440894 | 441052 | 192974 | 193132 | gene=sspK       | protein=acid-soluble spore protein K                  | protein_id=KGT45750.1 |
| gene      | 441175 | 441441 | 193255 | 193521 | gene=IY08_02380 | protein=hypothetical protein                          | protein_id=KGT45751.1 |
| gene      | 441466 | 442446 | 193546 | 194526 | gene=IY08_02385 | protein=membrane protein                              | protein_id=KGT45752.1 |
| gene      | 442596 | 443693 | 194676 | 195773 | gene=IY08_02390 | protein=DNA glycosylase                               | protein_id=KGT45753.1 |
| gene      | 443728 | 443952 | 195808 | 196032 | gene=IY08_02395 | protein=hypothetical protein                          | protein_id=KGT45754.1 |
| gene      | 444078 | 444359 | 196158 | 196439 | gene=IY08_02400 | protein=spore protein                                 | protein_id=KGT45755.1 |
| gene      | 444548 | 444808 | 196628 | 196888 | gene=IY08_02405 | protein=stress-induced protein                        | protein_id=KGT45756.1 |
| gene      | 445081 | 445611 | 197161 | 197691 | gene=IY08_02410 | protein=hypothetical protein                          | protein_id=KGT45757.1 |
| gene      | 445666 | 447426 | 197746 | 199506 | gene=IY08_02415 | protein=multidrug ABC transporter ATP-binding protein | protein_id=KGT45758.1 |
| gene      | 447441 | 448529 | 199521 | 200609 | gene=IY08_02420 | protein=membrane protein                              | protein_id=KGT45759.1 |
| gene      | 448886 | 453322 | 200966 | 205402 | gene=IY08_02425 | protein=glutamate synthase                            | protein_id=KGT45760.1 |
| gene      | 453521 | 454819 | 205601 | 206899 | gene=IY08_02430 | protein=glutamate-1-semialdehyde aminotransferase     | protein_id=KGT45761.1 |
| gene      | 454947 | 455960 | 207027 | 208040 | gene=IY08_02435 | protein=daunorubicin ABC transporter ATP-binding      | protein_id=KGT45762.1 |
| gene      | 455953 | 456744 | 208033 | 208824 | gene=IY08_02440 | protein=daunorubicin ABC transporter permease         | protein_id=KGT45763.1 |
| gene      | 456749 | 457534 | 208829 | 209614 | gene=IY08_02445 | protein=ABC transporter permease                      | protein_id=KGT45764.1 |
| gene      | 457607 | 458011 | 209687 | 210091 | gene=IY08_02450 | protein=transporter                                   | protein_id=KGT45765.1 |
| gene      | 458056 | 458511 | 210136 | 210591 | gene=IY08_02455 | protein=peroxiredoxin                                 | protein_id=KGT45766.1 |
| gene      | 458806 | 459240 | 210886 | 211320 | gene=IY08_02460 | protein=Fur family transcriptional regulator          | protein_id=KGT45767.1 |
| gene      | 459411 | 459830 | 211491 | 211910 | gene=IY08_02465 | protein=GCN5 family acetyltransferase                 | protein_id=KGT45768.1 |
| gene      | 459936 | 460292 | 212016 | 212372 | gene=IY08_02470 | protein=hypothetical protein                          | protein_id=KGT45769.1 |
| scaffold8 |        |        |        |        |                 |                                                       |                       |
| gene      | 460743 | 460826 | 3      | 86     | tRNA            |                                                       |                       |
| gene      | 460834 | 460907 | 94     | 167    | tRNA            |                                                       |                       |
| gene      | 460928 | 461003 | 188    | 263    | tRNA            |                                                       |                       |
| gene      | 461067 | 461141 | 327    | 401    | tRNA            |                                                       |                       |

|      |        |        |       |       |                 |                                               |                       |
|------|--------|--------|-------|-------|-----------------|-----------------------------------------------|-----------------------|
| gene | 461147 | 461221 | 407   | 481   | tRNA            |                                               |                       |
| gene | 461235 | 461305 | 495   | 565   | tRNA            |                                               |                       |
| gene | 461316 | 461400 | 576   | 660   | tRNA            |                                               |                       |
| gene | 461515 | 461835 | 775   | 1095  | gene=IY08_02510 | protein=hypothetical protein                  | protein_id=KGT45480.1 |
| gene | 462186 | 462905 | 1446  | 2165  | gene=IY08_02515 | protein=hypothetical protein                  | protein_id=KGT45481.1 |
| gene | 463051 | 463512 | 2311  | 2772  | gene=IY08_02520 | protein=DNA mismatch repair protein MutT      | protein_id=KGT45482.1 |
| gene | 464005 | 464781 | 3265  | 4041  | gene=IY08_02525 | protein=peptidoglycan transglycosylase        | protein_id=KGT45483.1 |
| gene | 464969 | 465619 | 4229  | 4879  | gene=IY08_02530 | protein=disulfide bond formation protein DsbD | protein_id=KGT45484.1 |
| gene | 465735 | 465808 | 4995  | 5068  | tRNA            |                                               |                       |
| gene | 466008 | 467150 | 5268  | 6410  | gene=IY08_02540 | protein=iron-sulfur cluster-binding protein   | protein_id=KGT45485.1 |
| gene | 467195 | 468082 | 6455  | 7342  | gene=IY08_02545 | protein=hypothetical protein                  | protein_id=KGT45486.1 |
| gene | 468141 | 468629 | 7401  | 7889  | gene=IY08_02550 | protein=tRNA methyltransferase                | protein_id=KGT45487.1 |
| gene | 468757 | 470826 | 8017  | 10086 | gene=IY08_02555 | protein=diguanylate cyclase                   | protein_id=KGT45488.1 |
| gene | 470849 | 470944 | 10109 | 10204 | gene=IY08_02560 | protein=hypothetical protein                  | protein_id=KGT45489.1 |
| gene | 471211 | 473106 | 10471 | 12366 | gene=IY08_02565 | protein=protein prkA                          | protein_id=KGT45490.1 |
| gene | 473180 | 473329 | 12440 | 12589 | gene=IY08_02570 | protein=hypothetical protein                  | protein_id=KGT45491.1 |
| gene | 473559 | 474734 | 12819 | 13994 | gene=IY08_02575 | protein=stress response protein               | protein_id=KGT45492.1 |
| gene | 474863 | 477535 | 14123 | 16795 | gene=IY08_02580 | protein=internalin                            | protein_id=KGT45493.1 |
| gene | 477697 | 478565 | 16957 | 17825 | pseudo          |                                               |                       |
| gene | 478627 | 480177 | 17887 | 19437 | gene=IY08_02590 | protein=glycine/betaine ABC transporter       | protein_id=KGT45494.1 |
| gene | 480424 | 483321 | 19684 | 22581 | gene=IY08_02595 | protein=collagenase                           | protein_id=KGT45495.1 |
| gene | 483569 | 484117 | 22829 | 23377 | gene=IY08_02600 | protein=phosphate ABC transporter permease    | protein_id=KGT45496.1 |
| gene | 484130 | 485704 | 23390 | 24964 | gene=IY08_02605 | protein=flotillin                             | protein_id=KGT45497.1 |
| gene | 485954 | 487930 | 25214 | 27190 | gene=IY08_02610 | protein=chemotaxis protein                    | protein_id=KGT45498.1 |
| gene | 488088 | 489689 | 27348 | 28949 | gene=IY08_02615 | protein=histidine kinase                      | protein_id=KGT45499.1 |
| gene | 489692 | 490384 | 28952 | 29644 | gene=IY08_02620 | protein=chemotaxis protein CheY               | protein_id=KGT45500.1 |
| gene | 490429 | 491733 | 29689 | 30993 | gene=IY08_02625 | protein=citrate transporter                   | protein_id=KGT45501.1 |
| gene | 491988 | 492242 | 31248 | 31502 | gene=IY08_02630 | protein=hypothetical protein                  | protein_id=KGT45502.1 |
| gene | 492378 | 492881 | 31638 | 32141 | gene=IY08_02635 | protein=lipoprotein                           | protein_id=KGT45503.1 |
| gene | 493566 | 494189 | 32826 | 33449 | gene=IY08_02640 | protein=ankyrin                               | protein_id=KGT45504.1 |
| gene | 494344 | 494607 | 33604 | 33867 | gene=IY08_02645 | protein=hypothetical protein                  | protein_id=KGT45505.1 |

|      |        |        |       |       |                 |                                                                        |                       |
|------|--------|--------|-------|-------|-----------------|------------------------------------------------------------------------|-----------------------|
| gene | 494915 | 495481 | 34175 | 34741 | gene=IY08_02650 | protein=transcriptional regulator                                      | protein_id=KGT45506.1 |
| gene | 495478 | 496575 | 34738 | 35835 | gene=IY08_02655 | protein=glycerol-3-phosphate ABC transporter ATP-binding protein       | protein_id=KGT45507.1 |
| gene | 496575 | 497507 | 35835 | 36767 | gene=IY08_02660 | protein=glycerol-3-phosphate ABC transporter permease                  | protein_id=KGT45508.1 |
| gene | 497504 | 498325 | 36764 | 37585 | gene=IY08_02665 | protein=glycerol-3-phosphate ABC transporter permease                  | protein_id=KGT45509.1 |
| gene | 498347 | 499723 | 37607 | 38983 | gene=IY08_02670 | protein=glycerol-3-phosphate ABC transporter substrate-binding protein | protein_id=KGT45510.1 |
| gene | 500177 | 500881 | 39437 | 40141 | gene=IY08_02680 | protein=serine/threonine protein phosphatase                           | protein_id=KGT45511.1 |
| gene | 501074 | 501745 | 40334 | 41005 | gene=IY08_02685 | protein=response regulator                                             | protein_id=KGT45512.1 |
| gene | 501757 | 502992 | 41017 | 42252 | gene=IY08_02690 | protein=histidine kinase                                               | protein_id=KGT45513.1 |
| gene | 503226 | 504047 | 42486 | 43307 | gene=IY08_02695 | protein=transporter                                                    | protein_id=KGT45514.1 |
| gene | 504061 | 504810 | 43321 | 44070 | gene=IY08_02700 | protein=hypothetical protein                                           | protein_id=KGT45515.1 |
| gene | 505063 | 507045 | 44323 | 46305 | gene=IY08_02705 | protein=chemotaxis protein                                             | protein_id=KGT45516.1 |
| gene | 507124 | 508728 | 46384 | 47988 | gene=IY08_02710 | protein=histidine kinase                                               | protein_id=KGT45517.1 |
| gene | 508725 | 509432 | 47985 | 48692 | gene=IY08_02715 | protein=response regulator                                             | protein_id=KGT45518.1 |
| gene | 509555 | 510901 | 48815 | 50161 | gene=IY08_02720 | protein=malate permease                                                | protein_id=KGT45519.1 |
| gene | 510961 | 512160 | 50221 | 51420 | gene=IY08_02725 | protein=malate dehydrogenase                                           | protein_id=KGT45520.1 |
| gene | 512453 | 512977 | 51713 | 52237 | gene=IY08_02735 | protein=lipoprotein                                                    | protein_id=KGT45521.1 |
| gene | 513165 | 514091 | 52425 | 53351 | gene=IY08_02740 | protein=membrane protein                                               | protein_id=KGT45522.1 |
| gene | 514212 | 515612 | 53472 | 54872 | gene=IY08_02745 | protein=GntR family transcriptional regulator                          | protein_id=KGT45523.1 |
| gene | 515645 | 516157 | 54905 | 55417 | gene=IY08_02750 | protein=acetyltransferase                                              | protein_id=KGT45524.1 |
| gene | 516303 | 517757 | 55563 | 57017 | gene=IY08_02755 | protein=histidine kinase                                               | protein_id=KGT45525.1 |
| gene | 517823 | 518494 | 57083 | 57754 | gene=IY08_02760 | protein=XRE family transcriptional regulator                           | protein_id=KGT45526.1 |
| gene | 518824 | 518946 | 58084 | 58206 | gene=IY08_02765 | protein=hypothetical protein                                           | protein_id=KGT45527.1 |
| gene | 519455 | 519961 | 58715 | 59221 | gene=IY08_02780 | protein=acetyltransferase                                              | protein_id=KGT45528.1 |
| gene | 520189 | 520995 | 59449 | 60255 | gene=IY08_02785 | protein=formate dehydrogenase                                          | protein_id=KGT45529.1 |
| gene | 521296 | 524232 | 60556 | 63492 | gene=IY08_02790 | protein=oxidoreductase                                                 | protein_id=KGT45530.1 |
| gene | 524245 | 524727 | 63505 | 63987 | gene=IY08_02795 | protein=hypothetical protein                                           | protein_id=KGT45531.1 |
| gene | 524883 | 526754 | 64143 | 66014 | gene=IY08_02800 | protein=glycerophosphodiester phosphodiesterase                        | protein_id=KGT45532.1 |
| gene | 527122 | 528255 | 66382 | 67515 | gene=IY08_02805 | protein=alanine dehydrogenase                                          | protein_id=KGT45533.1 |
| gene | 528359 | 529774 | 67619 | 69034 | gene=IY08_02810 | protein=amino acid permease                                            | protein_id=KGT45534.1 |

|      |        |        |        |        |                 |                                                |                       |
|------|--------|--------|--------|--------|-----------------|------------------------------------------------|-----------------------|
| gene | 529906 | 530460 | 69166  | 69720  | gene=IY08_02815 | protein=hypothetical protein                   | protein_id=KGT45535.1 |
| gene | 530667 | 531044 | 69927  | 70304  | gene=IY08_02820 | protein=ArsR family transcriptional regulator  | protein_id=KGT45536.1 |
| gene | 531068 | 533434 | 70328  | 72694  | gene=IY08_02825 | protein=cadmium transporter                    | protein_id=KGT45537.1 |
| gene | 533637 | 535100 | 72897  | 74360  | gene=IY08_02830 | protein=nicotinate phosphoribosyltransferase   | protein_id=KGT45538.1 |
| gene | 535300 | 536571 | 74560  | 75831  | gene=IY08_02835 | protein=transcriptional regulator              | protein_id=KGT45539.1 |
| gene | 536866 | 538566 | 76126  | 77826  | gene=IY08_02845 | protein=bacillolysin                           | protein_id=KGT45540.1 |
| gene | 538630 | 539178 | 77890  | 78438  | gene=IY08_02850 | protein=hypothetical protein                   | protein_id=KGT45541.1 |
| gene | 539577 | 540095 | 78837  | 79355  | gene=IY08_02855 | protein=lipoprotein                            | protein_id=KGT45542.1 |
| gene | 540112 | 540384 | 79372  | 79644  | gene=IY08_02860 | protein=hypothetical protein                   | protein_id=KGT45543.1 |
| gene | 540427 | 541689 | 79687  | 80949  | gene=IY08_02865 | protein=vancomycin resistance protein          | protein_id=KGT45544.1 |
| gene | 541924 | 542940 | 81184  | 82200  | gene=IY08_02870 | protein=LytR family transcriptional regulator  | protein_id=KGT45545.1 |
| gene | 543275 | 544453 | 82535  | 83713  | gene=IY08_02875 | protein=pyrimidine nucleoside transporter NupC | protein_id=KGT45546.1 |
| gene | 544545 | 544931 | 83805  | 84191  | gene=IY08_02880 | protein=hypothetical protein                   | protein_id=KGT45547.1 |
| gene | 545040 | 546338 | 84300  | 85598  | gene=IY08_02885 | protein=membrane protein                       | protein_id=KGT45548.1 |
| gene | 546512 | 547945 | 85772  | 87205  | gene=aspA       | protein=aspartate ammonia-lyase                | protein_id=KGT45549.1 |
| gene | 547985 | 549604 | 87245  | 88864  | gene=IY08_02895 | protein=L-lactate permease                     | protein_id=KGT45550.1 |
| gene | 550422 | 550709 | 89682  | 89969  | gene=IY08_02900 | protein=ArsR family transcriptional regulator  | protein_id=KGT45551.1 |
| gene | 550901 | 551080 | 90161  | 90340  | gene=sspH       | protein=acid-soluble spore protein H           | protein_id=KGT45552.1 |
| gene | 551118 | 552467 | 90378  | 91727  | gene=IY08_02910 | protein=MFS transporter                        | protein_id=KGT45553.1 |
| gene | 552848 | 553816 | 92108  | 93076  | gene=IY08_02915 | protein=iron siderophore-binding protein       | protein_id=KGT45554.1 |
| gene | 553989 | 554993 | 93249  | 94253  | gene=IY08_02920 | protein=iron ABC transporter                   | protein_id=KGT45555.1 |
| gene | 554990 | 556048 | 94250  | 95308  | gene=IY08_02925 | protein=iron ABC transporter permease          | protein_id=KGT45556.1 |
| gene | 556061 | 556882 | 95321  | 96142  | gene=IY08_02930 | protein=ABC transporter                        | protein_id=KGT45557.1 |
| gene | 556910 | 557641 | 96170  | 96901  | gene=IY08_02935 | protein=methyltransferase                      | protein_id=KGT45558.1 |
| gene | 557855 | 559045 | 97115  | 98305  | gene=IY08_02940 | protein=2-amino-3-ketobutyrate CoA ligase      | protein_id=KGT45559.1 |
| gene | 559090 | 560055 | 98350  | 99315  | gene=IY08_02945 | protein=UDP-glucose 4-epimerase                | protein_id=KGT45560.1 |
| gene | 560115 | 560537 | 99375  | 99797  | gene=IY08_02950 | protein=DNA mismatch repair protein MutT       | protein_id=KGT45561.1 |
| gene | 560575 | 562458 | 99835  | 101718 | gene=IY08_02955 | protein=von Willebrand factor A                | protein_id=KGT45562.1 |
| gene | 562462 | 563355 | 101722 | 102615 | gene=IY08_02960 | protein=hypothetical protein                   | protein_id=KGT45563.1 |
| gene | 563483 | 565012 | 102743 | 104272 | gene=IY08_02965 | protein=cardiolipin synthetase                 | protein_id=KGT45564.1 |
| gene | 565227 | 565583 | 104487 | 104843 | gene=IY08_02970 | protein=cobalt transporter                     | protein_id=KGT45565.1 |



|      |        |        |        |        |                 |                                                        |                       |
|------|--------|--------|--------|--------|-----------------|--------------------------------------------------------|-----------------------|
| gene | 566064 | 567767 | 105324 | 107027 | gene=IY08_02975 | protein=diguanylate cyclase                            | protein_id=KGT45566.1 |
| gene | 567799 | 569196 | 107059 | 108456 | gene=IY08_02980 | protein=arginine:ornithine antiporter                  | protein_id=KGT45567.1 |
| gene | 569649 | 570359 | 108909 | 109619 | gene=IY08_02985 | protein=GntR family transcriptional regulator          | protein_id=KGT45568.1 |
| gene | 570501 | 571928 | 109761 | 111188 | gene=IY08_02990 | protein=trehalose permease IIC protein                 | protein_id=KGT45569.1 |
| gene | 571942 | 573603 | 111202 | 112863 | gene=IY08_02995 | protein=trehalose-6-phosphate hydrolase                | protein_id=KGT45570.1 |
| gene | 573637 | 574585 | 112897 | 113845 | gene=IY08_03000 | protein=spore germination protein GerK                 | frame=2               |
| gene | 574780 | 575886 | 114040 | 115146 | gene=IY08_03010 | protein=spore germination protein GerK                 | protein_id=KGT45400.1 |
| gene | 575867 | 577369 | 115127 | 116629 | gene=IY08_03015 | protein=spore germination protein GerK                 | protein_id=KGT45401.1 |
| gene | 577558 | 578529 | 116818 | 117789 | gene=IY08_03020 | protein=aminoglycoside phosphotransferase              | protein_id=KGT45402.1 |
| gene | 578689 | 580149 | 117949 | 119409 | gene=IY08_03025 | protein=sodium:alanine symporter                       | protein_id=KGT45403.1 |
| gene | 580094 | 580301 | 119354 | 119561 | pseudo          |                                                        |                       |
| gene | 580282 | 581013 | 119542 | 120273 | gene=IY08_03035 | protein=amino acid ABC transporter ATP-binding protein | protein_id=KGT45404.1 |
| gene | 581026 | 581856 | 120286 | 121116 | gene=IY08_03040 | protein=glutamine ABC transporter substrate-binding    | protein_id=KGT45405.1 |
| gene | 581919 | 582575 | 121179 | 121835 | gene=IY08_03045 | protein=glutamine ABC transporter permease             | protein_id=KGT45406.1 |
| gene | 582576 | 583220 | 121836 | 122480 | gene=IY08_03050 | protein=glutamine ABC transporter permease             | protein_id=KGT45407.1 |
| gene | 583425 | 584852 | 122685 | 124112 | gene=IY08_03055 | protein=amino acid permease                            | protein_id=KGT45408.1 |
| gene | 584827 | 585204 | 124087 | 124464 | gene=IY08_03060 | protein=osmotically inducible protein C                | protein_id=KGT45409.1 |
| gene | 585268 | 585702 | 124528 | 124962 | gene=IY08_03065 | protein=HIT family hydrolase                           | protein_id=KGT45410.1 |
| gene | 585724 | 586665 | 124984 | 125925 | gene=IY08_03070 | protein=DeoR family transcriptional regulator          | protein_id=KGT45411.1 |
| gene | 586774 | 587295 | 126034 | 126555 | gene=IY08_03075 | protein=diacylglycerol kinase                          | protein_id=KGT45412.1 |
| gene | 587308 | 588699 | 126568 | 127959 | gene=IY08_03080 | protein=histidine kinase                               | protein_id=KGT45413.1 |
| gene | 588711 | 589388 | 127971 | 128648 | gene=IY08_03085 | protein=XRE family transcriptional regulator           | protein_id=KGT45414.1 |
| gene | 589564 | 590811 | 128824 | 130071 | gene=IY08_03090 | protein=ArsR family transcriptional regulator          | protein_id=KGT45415.1 |
| gene | 590967 | 592418 | 130227 | 131678 | gene=IY08_03095 | protein=sulfate transporter                            | protein_id=KGT45416.1 |
| gene | 592484 | 592906 | 131744 | 132166 | gene=IY08_03100 | protein=universal stress protein                       | protein_id=KGT45417.1 |
| gene | 593110 | 593226 | 132370 | 132486 | gene=IY08_03105 | protein=hypothetical protein                           | protein_id=KGT45418.1 |
| gene | 593345 | 594694 | 132605 | 133954 | gene=glpT       | protein=sn-glycerol-3-phosphate transporter            | protein_id=KGT45419.1 |
| gene | 594964 | 595422 | 134224 | 134682 | gene=IY08_03115 | protein=MarR family transcriptional regulator          | protein_id=KGT45420.1 |
| gene | 595442 | 597055 | 134702 | 136315 | gene=IY08_03120 | protein=MFS transporter                                | protein_id=KGT45421.1 |
| gene | 597193 | 598164 | 136453 | 137424 | gene=IY08_03125 | protein=ribose operon repressor                        | protein_id=KGT45422.1 |
| gene | 598178 | 599074 | 137438 | 138334 | gene=IY08_03130 | protein=ribokinase                                     | protein_id=KGT45423.1 |

|      |        |        |        |        |                 |                                                   |                       |
|------|--------|--------|--------|--------|-----------------|---------------------------------------------------|-----------------------|
| gene | 599071 | 599466 | 138331 | 138726 | gene=IY08_03135 | protein=ribose pyranase                           | protein_id=KGT45424.1 |
| gene | 599485 | 600969 | 138745 | 140229 | gene=IY08_03140 | protein=sugar ABC transporter ATP-binding protein | protein_id=KGT45425.1 |
| gene | 600972 | 601907 | 140232 | 141167 | gene=rbsC       | protein=ribose ABC transporter permease           | protein_id=KGT45426.1 |
| gene | 601922 | 602848 | 141182 | 142108 | gene=IY08_03150 | protein=D-ribose transporter subunit RbsB         | protein_id=KGT45427.1 |
| gene | 602883 | 603530 | 142143 | 142790 | gene=IY08_03155 | protein=transaldolase                             | protein_id=KGT45428.1 |
| gene | 603914 | 606313 | 143174 | 145573 | gene=IY08_03160 | protein=peptidase M6                              | protein_id=KGT45429.1 |
| gene | 606640 | 606981 | 145900 | 146241 | gene=IY08_03165 | protein=hypothetical protein                      | protein_id=KGT45430.1 |
| gene | 607003 | 607332 | 146263 | 146592 | gene=IY08_03170 | protein=hypothetical protein                      | protein_id=KGT45431.1 |
| gene | 607349 | 608503 | 146609 | 147763 | gene=IY08_03175 | protein=bicyclomycin resistance protein           | protein_id=KGT45432.1 |
| gene | 608729 | 609781 | 147989 | 149041 | gene=IY08_03180 | protein=butanediol dehydrogenase                  | protein_id=KGT45433.1 |
| gene | 609901 | 610245 | 149161 | 149505 | gene=IY08_03185 | protein=transporter                               | protein_id=KGT45434.1 |
| gene | 610499 | 611350 | 149759 | 150610 | gene=IY08_03190 | protein=phospholipase C                           | protein_id=KGT45435.1 |
| gene | 611427 | 612428 | 150687 | 151688 | gene=IY08_03195 | protein=phospholipase C                           | protein_id=KGT45436.1 |
| gene | 612536 | 613708 | 151796 | 152968 | gene=IY08_03200 | protein=amino acid aldolase                       | protein_id=KGT45437.1 |
| gene | 613696 | 615012 | 152956 | 154272 | gene=IY08_03205 | protein=FAD-binding oxidoreductase                | protein_id=KGT45438.1 |
| gene | 615104 | 616255 | 154364 | 155515 | gene=IY08_03210 | protein=permease                                  | protein_id=KGT45439.1 |
| gene | 616427 | 616630 | 155687 | 155890 | gene=IY08_03215 | protein=hypothetical protein                      | protein_id=KGT45440.1 |
| gene | 616759 | 617046 | 156019 | 156306 | gene=IY08_03220 | protein=hypothetical protein                      | protein_id=KGT45441.1 |
| gene | 617226 | 618038 | 156486 | 157298 | gene=IY08_03225 | protein=UDP pyrophosphate phosphatase             | protein_id=KGT45442.1 |
| gene | 618175 | 619116 | 157435 | 158376 | gene=IY08_03230 | protein=chemotaxis protein                        | protein_id=KGT45443.1 |
| gene | 619337 | 620617 | 158597 | 159877 | gene=IY08_03235 | protein=cell wall-binding protein                 | protein_id=KGT45444.1 |
| gene | 620730 | 620948 | 159990 | 160208 | gene=IY08_03240 | protein=XRE family transcriptional regulator      | protein_id=KGT45445.1 |
| gene | 620941 | 621414 | 160201 | 160674 | gene=IY08_03245 | protein=RNA dependent RNA polymerase              | protein_id=KGT45446.1 |
| gene | 621532 | 622164 | 160792 | 161424 | gene=IY08_03250 | protein=peptidase                                 | protein_id=KGT45447.1 |
| gene | 622304 | 623383 | 161564 | 162643 | gene=IY08_03255 | protein=ribosomal protein L5-like protein         | protein_id=KGT45448.1 |
| gene | 623413 | 624798 | 162673 | 164058 | gene=IY08_03260 | protein=MFS transporter                           | protein_id=KGT45449.1 |
| gene | 625051 | 626352 | 164311 | 165612 | gene=IY08_03270 | protein=branched-chain amino acid transporter     | protein_id=KGT45450.1 |
| gene | 626492 | 628213 | 165752 | 167473 | gene=IY08_03275 | protein=membrane protein                          | protein_id=KGT45451.1 |
| gene | 628249 | 629796 | 167509 | 169056 | gene=IY08_03280 | protein=DNA-binding protein                       | protein_id=KGT45452.1 |
| gene | 629978 | 631369 | 169238 | 170629 | gene=IY08_03285 | protein=D-alanine/D-serine/glycine permease       | protein_id=KGT45453.1 |
| gene | 631651 | 632943 | 170911 | 172203 | gene=IY08_03290 | protein=guanine permease                          | protein_id=KGT45454.1 |

|           |        |        |        |        |                 |                                                    |                       |
|-----------|--------|--------|--------|--------|-----------------|----------------------------------------------------|-----------------------|
| gene      | 633142 | 633345 | 172402 | 172605 | gene=IY08_03295 | protein=Cro/C1 family transcriptional regulator    | protein_id=KGT45455.1 |
| gene      | 633347 | 633775 | 172607 | 173035 | gene=IY08_03300 | protein=hypothetical protein                       | protein_id=KGT45456.1 |
| gene      | 633815 | 634252 | 173075 | 173512 | gene=IY08_03305 | protein=acetyltransferase                          | protein_id=KGT45457.1 |
| gene      | 634267 | 634488 | 173527 | 173748 | gene=IY08_03310 | protein=hypothetical protein                       | protein_id=KGT45458.1 |
| gene      | 634577 | 636406 | 173837 | 175666 | gene=IY08_03315 | protein=sodium:proton antiporter                   | protein_id=KGT45459.1 |
| gene      | 636627 | 636938 | 175887 | 176198 | gene=IY08_03320 | protein=quinol oxidase subunit 4                   | protein_id=KGT45460.1 |
| gene      | 636939 | 637541 | 176199 | 176801 | gene=IY08_03325 | protein=cytochrome o ubiquinol oxidase subunit III | protein_id=KGT45461.1 |
| gene      | 637555 | 639489 | 176815 | 178749 | gene=IY08_03330 | protein=quinol oxidase subunit 1                   | protein_id=KGT45462.1 |
| gene      | 639523 | 640398 | 178783 | 179658 | gene=IY08_03335 | protein=quinol oxidase subunit 2                   | protein_id=KGT45463.1 |
| gene      | 640681 | 642096 | 179941 | 181356 | gene=IY08_03340 | protein=amino acid permease                        | protein_id=KGT45464.1 |
| gene      | 642471 | 643181 | 181731 | 182441 | gene=IY08_03345 | protein=hypothetical protein                       | protein_id=KGT45465.1 |
| gene      | 643314 | 644489 | 182574 | 183749 | gene=IY08_03350 | protein=N-acyl-L-amino acid amidohydrolase         | protein_id=KGT45466.1 |
| gene      | 644491 | 644688 | 183751 | 183948 | gene=IY08_03355 | protein=permease                                   | protein_id=KGT45467.1 |
| gene      | 644685 | 646157 | 183945 | 185417 | gene=IY08_03360 | protein=sodium:solute symporter                    | protein_id=KGT45468.1 |
| gene      | 646388 | 647857 | 185648 | 187117 | gene=IY08_03365 | protein=spore germination protein GerLA            | protein_id=KGT45469.1 |
| gene      | 647858 | 648982 | 187118 | 188242 | gene=IY08_03370 | protein=spore germination protein GerLB            | protein_id=KGT45470.1 |
| gene      | 648966 | 650132 | 188226 | 189392 | gene=IY08_03375 | protein=spore germination protein GerLC            | protein_id=KGT45471.1 |
| gene      | 650144 | 650281 | 189404 | 189541 | gene=IY08_03380 | protein=hypothetical protein                       | protein_id=KGT45472.1 |
| gene      | 650343 | 651743 | 189603 | 191003 | gene=IY08_03385 | protein=iron transporter FeoB                      | protein_id=KGT45473.1 |
| gene      | 651721 | 652443 | 190981 | 191703 | gene=IY08_03390 | protein=iron transporter FeoB                      | protein_id=KGT45474.1 |
| gene      | 652440 | 652697 | 191700 | 191957 | gene=IY08_03395 | protein=iron transporter FeoA                      | protein_id=KGT45475.1 |
| gene      | 653210 | 654109 | 192470 | 193369 | gene=IY08_03400 | protein=phosphate-binding protein                  | protein_id=KGT45476.1 |
| gene      | 654180 | 655070 | 193440 | 194330 | gene=IY08_03405 | protein=phosphate ABC transporter permease         | protein_id=KGT45477.1 |
| gene      | 655073 | 655993 | 194333 | 195253 | gene=IY08_03410 | protein=phosphate ABC transporter permease         | protein_id=KGT45478.1 |
| gene      | 656224 | 659268 | 195484 | 198528 | gene=IY08_03415 | protein=multidrug transporter AcrB                 | protein_id=KGT45479.1 |
| scaffold9 |        |        |        |        |                 |                                                    |                       |
| gene      | 660008 | 660082 | 8      | 82     | tRNA            |                                                    |                       |
| gene      | 660084 | 660155 | 84     | 155    | tRNA            |                                                    |                       |
| gene      | 660285 | 660704 | 285    | 704    | gene=IY08_03430 | protein=inosine-5'-monophosphate dehydrogenase     | protein_id=KGT45297.1 |
| gene      | 661026 | 662177 | 1026   | 2177   | gene=IY08_03435 | protein=hypothetical protein                       | protein_id=KGT45298.1 |
| gene      | 662248 | 662403 | 2248   | 2403   | gene=IY08_03440 | protein=hypothetical protein                       | protein_id=KGT45299.1 |

|      |        |        |       |       |                 |                                                     |                       |
|------|--------|--------|-------|-------|-----------------|-----------------------------------------------------|-----------------------|
| gene | 662418 | 662750 | 2418  | 2750  | gene=IY08_03445 | protein=hypothetical protein                        | protein_id=KGT45300.1 |
| gene | 662756 | 663910 | 2756  | 3910  | gene=IY08_03450 | protein=peptidase M24                               | protein_id=KGT45301.1 |
| gene | 664541 | 665236 | 4541  | 5236  | gene=IY08_03455 | protein=thiaminase                                  | protein_id=KGT45302.1 |
| gene | 665205 | 665954 | 5205  | 5954  | gene=IY08_03460 | protein=ABC transporter ATP-binding protein         | protein_id=KGT45303.1 |
| gene | 665954 | 666706 | 5954  | 6706  | gene=IY08_03465 | protein=ABC transporter permease                    | protein_id=KGT45304.1 |
| gene | 666703 | 667704 | 6703  | 7704  | gene=IY08_03470 | protein=ABC transporter substrate-binding protein   | protein_id=KGT45305.1 |
| gene | 667715 | 668335 | 7715  | 8335  | gene=IY08_03475 | protein=transcriptional regulator TenI              | protein_id=KGT45306.1 |
| gene | 668328 | 669437 | 8328  | 9437  | gene=IY08_03480 | protein=glycine oxidase                             | protein_id=KGT45307.1 |
| gene | 669453 | 669656 | 9453  | 9656  | gene=IY08_03485 | protein=thiamine biosynthesis protein ThiS          | protein_id=KGT45308.1 |
| gene | 669659 | 670429 | 9659  | 10429 | gene=IY08_03490 | protein=thiazole synthase                           | protein_id=KGT45309.1 |
| gene | 670422 | 671441 | 10422 | 11441 | gene=IY08_03495 | protein=thiamine biosynthesis protein MoeB          | protein_id=KGT45310.1 |
| gene | 671457 | 672269 | 11457 | 12269 | gene=IY08_03500 | protein=phosphomethylpyrimidine kinase              | protein_id=KGT45311.1 |
| gene | 672596 | 672982 | 12596 | 12982 | gene=IY08_03505 | protein=hypothetical protein                        | protein_id=KGT45312.1 |
| gene | 672996 | 673229 | 12996 | 13229 | gene=IY08_03510 | protein=hypothetical protein                        | protein_id=KGT45313.1 |
| gene | 673735 | 673839 | 13735 | 13839 | gene=IY08_03515 | protein=SipW-cognate class signal peptide           | protein_id=KGT45314.1 |
| gene | 673836 | 673916 | 13836 | 13916 | gene=IY08_03520 | protein=potassium ABC transporter ATPase            | protein_id=KGT45315.1 |
| gene | 673937 | 675604 | 13937 | 15604 | gene=IY08_03525 | protein=potassium ABC transporter ATPase            | protein_id=KGT45316.1 |
| gene | 675618 | 677708 | 15618 | 17708 | gene=IY08_03530 | protein=potassium-transporting ATPase subunit B     | protein_id=KGT45317.1 |
| gene | 677725 | 678306 | 17725 | 18306 | gene=IY08_03535 | protein=potassium-transporting ATPase subunit C     | protein_id=KGT45318.1 |
| gene | 678372 | 679517 | 18372 | 19517 | gene=IY08_03540 | protein=histidine kinase                            | protein_id=KGT45319.1 |
| gene | 679542 | 680723 | 19542 | 20723 | gene=IY08_03545 | protein=MFS transporter                             | protein_id=KGT45320.1 |
| gene | 680864 | 681325 | 20864 | 21325 | gene=IY08_03550 | protein=MarR family transcriptional regulator       | protein_id=KGT45321.1 |
| gene | 681454 | 682308 | 21454 | 22308 | gene=IY08_03555 | protein=serine protease                             | protein_id=KGT45322.1 |
| gene | 682505 | 682888 | 22505 | 22888 | gene=IY08_03560 | protein=hypothetical protein                        | protein_id=KGT45323.1 |
| gene | 682976 | 684049 | 22976 | 24049 | gene=IY08_03565 | protein=ABC transporter permease                    | protein_id=KGT45324.1 |
| gene | 684059 | 685291 | 24059 | 25291 | gene=IY08_03570 | protein=ABC transporter permease                    | protein_id=KGT45325.1 |
| gene | 685292 | 685942 | 25292 | 25942 | gene=IY08_03575 | protein=peptide ABC transporter ATP-binding protein | protein_id=KGT45326.1 |
| gene | 685975 | 686178 | 25975 | 26178 | gene=IY08_03580 | protein=hypothetical protein                        | protein_id=KGT45327.1 |
| gene | 686276 | 687577 | 26276 | 27577 | gene=IY08_03585 | protein=guanine permease                            | protein_id=KGT45328.1 |
| gene | 687780 | 688646 | 27780 | 28646 | gene=IY08_03590 | protein=dehydrogenase                               | protein_id=KGT45329.1 |
| gene | 688713 | 689474 | 28713 | 29474 | gene=IY08_03595 | protein=protein erfK/srfK                           | protein_id=KGT45330.1 |

|      |        |        |       |       |                 |                                                          |                       |
|------|--------|--------|-------|-------|-----------------|----------------------------------------------------------|-----------------------|
| gene | 689578 | 689829 | 29578 | 29829 | gene=IY08_03600 | protein=membrane protein                                 | protein_id=KGT45331.1 |
| gene | 689842 | 690783 | 29842 | 30783 | gene=IY08_03605 | protein=fructokinase                                     | protein_id=KGT45332.1 |
| gene | 690780 | 692255 | 30780 | 32255 | gene=IY08_03610 | protein=glycosyl hydrolase family 32                     | protein_id=KGT45333.1 |
| gene | 692273 | 693649 | 32273 | 33649 | gene=IY08_03615 | protein=PTS system sucrose-specific transporter subunits | protein_id=KGT45334.1 |
| gene | 693785 | 694771 | 33785 | 34771 | gene=IY08_03620 | protein=LacI family transcriptional regulator            | protein_id=KGT45335.1 |
| gene | 694889 | 695104 | 34889 | 35104 | gene=IY08_03625 | protein=disulfide formation protein C                    | protein_id=KGT45336.1 |
| gene | 695177 | 695632 | 35177 | 35632 | gene=IY08_03630 | protein=thioredoxin                                      | protein_id=KGT45337.1 |
| gene | 695645 | 696064 | 35645 | 36064 | gene=IY08_03635 | protein=disulfide oxidoreductase                         | protein_id=KGT45338.1 |
| gene | 696230 | 696478 | 36230 | 36478 | gene=IY08_03640 | protein=hypothetical protein                             | protein_id=KGT45339.1 |
| gene | 696599 | 697111 | 36599 | 37111 | gene=IY08_03645 | protein=lipoprotein                                      | protein_id=KGT45340.1 |
| gene | 697157 | 698266 | 37157 | 38266 | gene=IY08_03650 | protein=spore germination protein GerB                   | protein_id=KGT45341.1 |
| gene | 698283 | 699365 | 38283 | 39365 | gene=IY08_03655 | protein=spore germination protein GerC                   | protein_id=KGT45342.1 |
| gene | 699362 | 700879 | 39362 | 40879 | gene=IY08_03660 | protein=spore germination protein GerA                   | protein_id=KGT45343.1 |
| gene | 701005 | 701601 | 41005 | 41601 | gene=IY08_03665 | protein=hypothetical protein                             | protein_id=KGT45344.1 |
| gene | 701840 | 702400 | 41840 | 42400 | gene=IY08_03670 | protein=nitroreductase                                   | protein_id=KGT45345.1 |
| gene | 702515 | 703933 | 42515 | 43933 | gene=IY08_03675 | protein=stage V sporulation protein R                    | protein_id=KGT45346.1 |
| gene | 704042 | 705313 | 44042 | 45313 | gene=IY08_03680 | protein=alkaline ceramidase                              | protein_id=KGT45347.1 |
| gene | 705488 | 706456 | 45488 | 46456 | gene=IY08_03685 | protein=peptidase                                        | protein_id=KGT45348.1 |
| gene | 706829 | 708493 | 46829 | 48493 | gene=IY08_03690 | protein=CoA-disulfide reductase                          | protein_id=KGT45349.1 |
| gene | 708679 | 708942 | 48679 | 48942 | gene=IY08_03695 | protein=cytoplasmic protein                              | protein_id=KGT45350.1 |
| gene | 709031 | 709591 | 49031 | 49591 | gene=IY08_03700 | protein=hypothetical protein                             | protein_id=KGT45351.1 |
| gene | 709630 | 710760 | 49630 | 50760 | gene=IY08_03705 | protein=hypothetical protein                             | protein_id=KGT45352.1 |
| gene | 710799 | 711026 | 50799 | 51026 | gene=IY08_03710 | protein=hypothetical protein                             | protein_id=KGT45353.1 |
| gene | 711093 | 711437 | 51093 | 51437 | gene=IY08_03715 | protein=sulfurtransferase                                | protein_id=KGT45354.1 |
| gene | 711457 | 711822 | 51457 | 51822 | gene=IY08_03720 | protein=sulfurtransferase                                | protein_id=KGT45355.1 |
| gene | 711837 | 712133 | 51837 | 52133 | gene=IY08_03725 | protein=rhodanese domain protein                         | protein_id=KGT45356.1 |
| gene | 712206 | 712685 | 52206 | 52685 | gene=IY08_03730 | protein=hypothetical protein                             | protein_id=KGT45357.1 |
| gene | 712719 | 713483 | 52719 | 53483 | gene=IY08_03735 | protein=membrane protein                                 | protein_id=KGT45358.1 |
| gene | 713553 | 713993 | 53553 | 53993 | gene=IY08_03740 | protein=hypothetical protein                             | protein_id=KGT45359.1 |
| gene | 714142 | 715341 | 54142 | 55341 | gene=IY08_03745 | protein=LytR family transcriptional regulator            | protein_id=KGT45360.1 |
| gene | 715656 | 716651 | 55656 | 56651 | gene=IY08_03750 | protein=quinone oxidoreductase                           | protein_id=KGT45361.1 |

|      |        |        |       |       |                 |                                                       |                       |
|------|--------|--------|-------|-------|-----------------|-------------------------------------------------------|-----------------------|
| gene | 716688 | 718343 | 56688 | 58343 | gene=IY08_03755 | protein=sodium:phosphate symporter                    | protein_id=KGT45362.1 |
| gene | 718695 | 719897 | 58695 | 59897 | gene=IY08_03760 | protein=MFS transporter                               | protein_id=KGT45363.1 |
| gene | 720217 | 721305 | 60217 | 61305 | gene=IY08_03765 | protein=outer surface protein                         | protein_id=KGT45364.1 |
| gene | 721382 | 723322 | 61382 | 63322 | gene=IY08_03770 | protein=PTS fructose transporter subunit IIA          | protein_id=KGT45365.1 |
| gene | 723433 | 723753 | 63433 | 63753 | gene=IY08_03775 | protein=PTS cellobiose transporter subunit IIA        | protein_id=KGT45366.1 |
| gene | 723755 | 724060 | 63755 | 64060 | gene=IY08_03780 | protein=PTS cellbiose transporter subunit IIB         | protein_id=KGT45367.1 |
| gene | 724144 | 725454 | 64144 | 65454 | gene=IY08_03785 | protein=PTS cellbiose transporter subunit IIC         | protein_id=KGT45368.1 |
| gene | 725430 | 725708 | 65430 | 65708 | gene=IY08_03790 | protein=hypothetical protein                          | protein_id=KGT45369.1 |
| gene | 725698 | 726783 | 65698 | 66783 | gene=IY08_03795 | protein=outer surface protein                         | protein_id=KGT45370.1 |
| gene | 726892 | 727815 | 66892 | 67815 | gene=IY08_03800 | protein=PBS lyase                                     | protein_id=KGT45371.1 |
| gene | 727869 | 729239 | 67869 | 69239 | gene=IY08_03805 | protein=enterotoxin                                   | protein_id=KGT45372.1 |
| gene | 729697 | 730875 | 69697 | 70875 | gene=IY08_03810 | protein=ABC transporter permease                      | protein_id=KGT45373.1 |
| gene | 730878 | 731552 | 70878 | 71552 | gene=IY08_03815 | protein=macrolide ABC transporter ATP-binding protein | protein_id=KGT45374.1 |
| gene | 731549 | 732652 | 71549 | 72652 | gene=IY08_03820 | protein=ABC transporter substrate-binding protein     | protein_id=KGT45375.1 |
| gene | 732864 | 733598 | 72864 | 73598 | gene=IY08_03825 | protein=ABC transporter permease                      | protein_id=KGT45376.1 |
| gene | 733689 | 734555 | 73689 | 74555 | gene=IY08_03830 | protein=peptide ABC transporter permease              | protein_id=KGT45377.1 |
| gene | 734557 | 735561 | 74557 | 75561 | gene=IY08_03835 | protein=peptide ABC transporter permease              | protein_id=KGT45378.1 |
| gene | 735607 | 736923 | 75607 | 76923 | gene=IY08_03840 | protein=branched-chain amino acid transporter         | protein_id=KGT45379.1 |
| gene | 737141 | 737710 | 77141 | 77710 | gene=IY08_03845 | protein=CotJC                                         | protein_id=KGT45380.1 |
| gene | 737723 | 737986 | 77723 | 77986 | gene=IY08_03850 | protein=spore coat protein CotJB                      | protein_id=KGT45381.1 |
| gene | 737995 | 738210 | 77995 | 78210 | gene=IY08_03855 | protein=CotJA                                         | protein_id=KGT45382.1 |
| gene | 738310 | 738672 | 78310 | 78672 | gene=IY08_03860 | protein=lactoylglutathione lyase                      | protein_id=KGT45383.1 |
| gene | 738687 | 739466 | 78687 | 79466 | gene=IY08_03865 | protein=hypothetical protein                          | protein_id=KGT45384.1 |
| gene | 739484 | 740296 | 79484 | 80296 | gene=IY08_03870 | protein=DNA repair protein                            | protein_id=KGT45385.1 |
| gene | 740635 | 740916 | 80635 | 80916 | gene=IY08_03875 | protein=membrane protein                              | protein_id=KGT45386.1 |
| gene | 740927 | 741532 | 80927 | 81532 | gene=IY08_03880 | protein=alkaline phosphatase                          | protein_id=KGT45387.1 |
| gene | 741631 | 741999 | 81631 | 81999 | gene=IY08_03885 | protein=hypothetical protein                          | protein_id=KGT45388.1 |
| gene | 742020 | 742364 | 82020 | 82364 | gene=IY08_03890 | protein=hypothetical protein                          | protein_id=KGT45389.1 |
| gene | 742421 | 742846 | 82421 | 82846 | gene=IY08_03895 | protein=group-specific protein                        | protein_id=KGT45390.1 |
| gene | 743199 | 745661 | 83199 | 85661 | gene=IY08_03900 | protein=acid phosphatase                              | protein_id=KGT45391.1 |
| gene | 745741 | 745944 | 85741 | 85944 | gene=IY08_03905 | protein=hypothetical protein                          | protein_id=KGT45392.1 |

|      |        |        |        |        |                 |                                                        |                       |
|------|--------|--------|--------|--------|-----------------|--------------------------------------------------------|-----------------------|
| gene | 745957 | 746127 | 85957  | 86127  | gene=IY08_03910 | protein=RpiR family transcriptional regulator          | protein_id=KGT45393.1 |
| gene | 746156 | 747559 | 86156  | 87559  | gene=IY08_03915 | protein=amino acid permease                            | protein_id=KGT45394.1 |
| gene | 747818 | 748945 | 87818  | 88945  | gene=IY08_03920 | protein=sodium:proton antiporter                       | protein_id=KGT45395.1 |
| gene | 749070 | 749384 | 89070  | 89384  | gene=IY08_03925 | protein=outer surface protein                          | protein_id=KGT45396.1 |
| gene | 749414 | 750277 | 89414  | 90277  | gene=IY08_03930 | protein=RpiR family transcriptional regulator          | protein_id=KGT45397.1 |
| gene | 750588 | 751472 | 90588  | 91472  | gene=murQ       | protein=N-acetylmuramic acid-6-phosphate etherase      | protein_id=KGT45398.1 |
| gene | 751515 | 751988 | 91515  | 91988  | gene=IY08_03940 | protein=PTS sugar transporter subunit IIC              | partial=3'            |
| gene | 752028 | 752895 | 92028  | 92895  | gene=IY08_03945 | protein=PTS sugar transporter subunit IIC              | frame=2               |
| gene | 752944 | 754017 | 92944  | 94017  | gene=IY08_03950 | protein=cell surface protein                           | protein_id=KGT45162.1 |
| gene | 754170 | 754574 | 94170  | 94574  | gene=IY08_03955 | protein=DoxX                                           | protein_id=KGT45163.1 |
| gene | 754729 | 755130 | 94729  | 95130  | gene=IY08_03960 | protein=ketosteroid isomerase                          | protein_id=KGT45164.1 |
| gene | 755130 | 755615 | 95130  | 95615  | gene=IY08_03965 | protein=hypothetical protein                           | protein_id=KGT45165.1 |
| gene | 755650 | 756561 | 95650  | 96561  | gene=IY08_03970 | protein=transporter                                    | protein_id=KGT45166.1 |
| gene | 756767 | 757261 | 96767  | 97261  | gene=IY08_03975 | protein=AsnC family transcriptional regulator          | protein_id=KGT45167.1 |
| gene | 757390 | 757845 | 97390  | 97845  | gene=IY08_03980 | protein=acetyltransferase                              | protein_id=KGT45168.1 |
| gene | 757926 | 758696 | 97926  | 98696  | gene=IY08_03985 | protein=oxidoreductase                                 | protein_id=KGT45169.1 |
| gene | 758831 | 759190 | 98831  | 99190  | gene=IY08_03990 | protein=MerR family transcriptional regulator          | protein_id=KGT45170.1 |
| gene | 759603 | 759947 | 99603  | 99947  | gene=IY08_03995 | protein=ligand-binding protein SH3                     | protein_id=KGT45171.1 |
| gene | 759950 | 760264 | 99950  | 100264 | gene=IY08_04000 | protein=multidrug resistance protein SMR               | protein_id=KGT45172.1 |
| gene | 760416 | 760994 | 100416 | 100994 | gene=IY08_04005 | protein=TetR family transcriptional regulator          | protein_id=KGT45173.1 |
| gene | 761208 | 762410 | 101208 | 102410 | gene=IY08_04010 | protein=multidrug MFS transporter                      | protein_id=KGT45174.1 |
| gene | 763683 | 764063 | 103683 | 104063 | gene=IY08_04015 | protein=hypothetical protein                           | protein_id=KGT45175.1 |
| gene | 764550 | 765248 | 104550 | 105248 | gene=IY08_04025 | protein=DeoR family transcriptional regulator          | protein_id=KGT45176.1 |
| gene | 765241 | 766326 | 105241 | 106326 | gene=IY08_04030 | protein=histidine kinase                               | protein_id=KGT45177.1 |
| gene | 766603 | 767703 | 106603 | 107703 | gene=IY08_04035 | protein=ABC transporter substrate-binding protein      | protein_id=KGT45178.1 |
| gene | 767700 | 768374 | 107700 | 108374 | gene=IY08_04040 | protein=macrolide ABC transporter ATP-binding protein  | protein_id=KGT45179.1 |
| gene | 768377 | 769555 | 108377 | 109555 | gene=IY08_04045 | protein=ABC transporter permease                       | protein_id=KGT45180.1 |
| gene | 769727 | 770497 | 109727 | 110497 | gene=IY08_04050 | protein=bacitracin ABC transporter ATP-binding protein | protein_id=KGT45181.1 |
| gene | 770574 | 771941 | 110574 | 111941 | gene=IY08_04055 | protein=permease                                       | protein_id=KGT45182.1 |
| gene | 772254 | 773261 | 112254 | 113261 | gene=IY08_04060 | protein=metallo-beta-lactamase                         | protein_id=KGT45183.1 |
| gene | 773536 | 773850 | 113536 | 113850 | pseudo          |                                                        |                       |

|      |        |        |        |        |                 |                                                       |                       |
|------|--------|--------|--------|--------|-----------------|-------------------------------------------------------|-----------------------|
| gene | 773892 | 774230 | 113892 | 114230 | gene=IY08_04070 | protein=MarR family transcriptional regulator         | protein_id=KGT45184.1 |
| gene | 774400 | 774939 | 114400 | 114939 | gene=IY08_04075 | protein=lipoprotein                                   | protein_id=KGT45185.1 |
| gene | 774963 | 775511 | 114963 | 115511 | gene=IY08_04080 | protein=flavodoxin                                    | protein_id=KGT45186.1 |
| gene | 775574 | 777313 | 115574 | 117313 | gene=IY08_04085 | protein=ABC transporter substrate-binding protein     | protein_id=KGT45187.1 |
| gene | 777418 | 778674 | 117418 | 118674 | gene=IY08_04090 | protein=MFS transporter                               | protein_id=KGT45188.1 |
| gene | 778719 | 778922 | 118719 | 118922 | gene=IY08_04095 | protein=hypothetical protein                          | protein_id=KGT45189.1 |
| gene | 779248 | 779763 | 119248 | 119763 | gene=IY08_04105 | protein=cysteine protease                             | protein_id=KGT45190.1 |
| gene | 779787 | 781784 | 119787 | 121784 | gene=IY08_04110 | protein=catalase                                      | protein_id=KGT45191.1 |
| gene | 781974 | 783173 | 121974 | 123173 | gene=IY08_04115 | protein=permease                                      | protein_id=KGT45192.1 |
| gene | 783234 | 784658 | 123234 | 124658 | gene=IY08_04120 | protein=arginine:ornithine antiporter                 | protein_id=KGT45193.1 |
| gene | 785190 | 786020 | 125190 | 126020 | gene=IY08_04125 | protein=glutamate racemase                            | protein_id=KGT45194.1 |
| gene | 786131 | 787216 | 126131 | 127216 | gene=IY08_04130 | protein=hypothetical protein                          | protein_id=KGT45195.1 |
| gene | 787296 | 788735 | 127296 | 128735 | gene=IY08_04135 | protein=glyceraldehyde-3-phosphate dehydrogenase      | protein_id=KGT45196.1 |
| gene | 788978 | 789082 | 128978 | 129082 | gene=IY08_04140 | protein=hypothetical protein                          | protein_id=KGT45197.1 |
| gene | 789332 | 791092 | 129332 | 131092 | gene=IY08_04145 | protein=multidrug ABC transporter ATP-binding protein | protein_id=KGT45198.1 |
| gene | 791089 | 793089 | 131089 | 133089 | gene=IY08_04150 | protein=multidrug ABC transporter permease            | protein_id=KGT45199.1 |
| gene | 793362 | 794159 | 133362 | 134159 | gene=IY08_04155 | protein=L-cystine-binding protein TcyA                | protein_id=KGT45200.1 |
| gene | 794146 | 794844 | 134146 | 134844 | gene=IY08_04160 | protein=cysteine ABC transporter permease             | protein_id=KGT45201.1 |
| gene | 794873 | 795607 | 134873 | 135607 | gene=IY08_04165 | protein=arginine ABC transporter ATP-binding protein  | protein_id=KGT45202.1 |
| gene | 795659 | 795862 | 135659 | 135862 | gene=IY08_04170 | protein=spore protein                                 | protein_id=KGT45203.1 |
| gene | 796312 | 796557 | 136312 | 136557 | gene=IY08_04175 | protein=hypothetical protein                          | protein_id=KGT45204.1 |
| gene | 796577 | 798034 | 136577 | 138034 | gene=IY08_04180 | protein=hypothetical protein                          | protein_id=KGT45205.1 |
| gene | 798055 | 799107 | 138055 | 139107 | gene=IY08_04185 | protein=histidine kinase                              | protein_id=KGT45206.1 |
| gene | 799237 | 800373 | 139237 | 140373 | gene=IY08_04190 | protein=membrane protein                              | protein_id=KGT45207.1 |
| gene | 800516 | 800872 | 140516 | 140872 | gene=IY08_04195 | protein=hypothetical protein                          | protein_id=KGT45208.1 |
| gene | 801002 | 801607 | 141002 | 141607 | gene=IY08_04200 | protein=hypothetical protein                          | protein_id=KGT45209.1 |
| gene | 801629 | 802189 | 141629 | 142189 | gene=IY08_04205 | protein=hypothetical protein                          | protein_id=KGT45210.1 |
| gene | 802625 | 804313 | 142625 | 144313 | gene=IY08_04210 | protein=acetolactate synthase                         | protein_id=KGT45211.1 |
| gene | 804330 | 805088 | 144330 | 145088 | gene=IY08_04215 | protein=alpha-acetolactate decarboxylase              | protein_id=KGT45212.1 |
| gene | 805150 | 805767 | 145150 | 145767 | gene=IY08_04220 | protein=3-methyladenine DNA glycosylase               | protein_id=KGT45213.1 |
| gene | 805902 | 806774 | 145902 | 146774 | gene=IY08_04225 | protein=haloacid dehalogenase                         | protein_id=KGT45214.1 |



|      |        |        |        |        |                 |                                                         |                       |
|------|--------|--------|--------|--------|-----------------|---------------------------------------------------------|-----------------------|
| gene | 807160 | 811113 | 147160 | 151113 | gene=IY08_04230 | protein=adhesin                                         | protein_id=KGT45215.1 |
| gene | 811208 | 812911 | 151208 | 152911 | gene=IY08_04235 | protein=N-acetylmuramoyl-L-alanine amidase              | protein_id=KGT45216.1 |
| gene | 813162 | 814652 | 153162 | 154652 | gene=IY08_04240 | protein=coproporphyrinogen III oxidase                  | protein_id=KGT45217.1 |
| gene | 814993 | 816549 | 154993 | 156549 | gene=IY08_04245 | protein=long-chain fatty acid--CoA ligase               | protein_id=KGT45218.1 |
| gene | 817095 | 817292 | 157095 | 157292 | gene=IY08_04250 | protein=hypothetical protein                            | protein_id=KGT45219.1 |
| gene | 817427 | 817891 | 157427 | 157891 | gene=IY08_04255 | protein=hypothetical protein                            | protein_id=KGT45220.1 |
| gene | 818079 | 819548 | 158079 | 159548 | gene=IY08_04260 | protein=sulfate transporter                             | protein_id=KGT45221.1 |
| gene | 819883 | 821403 | 159883 | 161403 | gene=IY08_04265 | protein=polysaccharide biosynthesis protein             | protein_id=KGT45222.1 |
| gene | 821547 | 822635 | 161547 | 162635 | gene=IY08_04270 | protein=CsaB protein                                    | protein_id=KGT45223.1 |
| gene | 822782 | 824644 | 162782 | 164644 | gene=IY08_04275 | protein=glucosaminidase                                 | protein_id=KGT45224.1 |
| gene | 824691 | 826085 | 164691 | 166085 | gene=IY08_04280 | protein=membrane protein                                | protein_id=KGT45225.1 |
| gene | 826410 | 827198 | 166410 | 167198 | gene=IY08_04285 | protein=enoyl-CoA hydratase                             | protein_id=KGT45226.1 |
| gene | 827308 | 827625 | 167308 | 167625 | gene=IY08_04290 | protein=hypothetical protein                            | protein_id=KGT45227.1 |
| gene | 827643 | 827969 | 167643 | 167969 | gene=IY08_04295 | protein=phosphoribosyl-ATP pyrophosphohydrolase         | protein_id=KGT45228.1 |
| gene | 827991 | 828170 | 167991 | 168170 | gene=IY08_04300 | protein=hypothetical protein                            | protein_id=KGT45229.1 |
| gene | 828297 | 829346 | 168297 | 169346 | gene=IY08_04305 | protein=peptidase M42                                   | protein_id=KGT45230.1 |
| gene | 829736 | 831343 | 169736 | 171343 | gene=IY08_04310 | protein=amidase                                         | protein_id=KGT45231.1 |
| gene | 831497 | 832450 | 171497 | 172450 | gene=IY08_04315 | protein=RNA methyltransferase                           | protein_id=KGT45232.1 |
| gene | 832633 | 832779 | 172633 | 172779 | gene=IY08_04320 | protein=hypothetical protein                            | protein_id=KGT45233.1 |
| gene | 833073 | 834077 | 173073 | 174077 | gene=IY08_04325 | protein=proline racemase                                | protein_id=KGT45234.1 |
| gene | 834097 | 835074 | 174097 | 175074 | gene=IY08_04330 | protein=ornithine cyclodeaminase                        | protein_id=KGT45235.1 |
| gene | 835239 | 835577 | 175239 | 175577 | gene=IY08_04335 | protein=hypothetical protein                            | protein_id=KGT45236.1 |
| gene | 835838 | 836467 | 175838 | 176467 | gene=IY08_04340 | protein=hypothetical protein                            | protein_id=KGT45237.1 |
| gene | 836931 | 837551 | 176931 | 177551 | gene=IY08_04345 | protein=thioredoxin                                     | protein_id=KGT45238.1 |
| gene | 837883 | 838704 | 177883 | 178704 | gene=IY08_04350 | protein=cytoplasmic protein                             | protein_id=KGT45239.1 |
| gene | 838709 | 839101 | 178709 | 179101 | gene=IY08_04355 | protein=ketosteroid isomerase                           | protein_id=KGT45240.1 |
| gene | 839253 | 839777 | 179253 | 179777 | gene=IY08_04365 | protein=pyruvate kinase                                 | protein_id=KGT45241.1 |
| gene | 840604 | 841221 | 180604 | 181221 | gene=IY08_04370 | protein=bacteriocin ABC transporter ATP-binding protein | protein_id=KGT45242.1 |
| gene | 841224 | 843389 | 181224 | 183389 | gene=IY08_04375 | protein=membrane protein                                | protein_id=KGT45243.1 |
| gene | 843477 | 843881 | 183477 | 183881 | gene=IY08_04380 | protein=hypothetical protein                            | protein_id=KGT45244.1 |
| gene | 844561 | 844872 | 184561 | 184872 | gene=IY08_04385 | protein=ArsR family transcriptional regulator           | protein_id=KGT45245.1 |

|      |        |        |        |        |                 |                                             |                       |
|------|--------|--------|--------|--------|-----------------|---------------------------------------------|-----------------------|
| gene | 845184 | 845627 | 185184 | 185627 | gene=IY08_04390 | protein=hypothetical protein                | protein_id=KGT45246.1 |
| gene | 846688 | 846834 | 186688 | 186834 | gene=IY08_04400 | protein=cytoplasmic protein                 | protein_id=KGT45247.1 |
| gene | 847229 | 847525 | 187229 | 187525 | gene=IY08_04405 | protein=type VII secretion protein EsxA     | protein_id=KGT45248.1 |
| gene | 847712 | 847987 | 187712 | 187987 | gene=IY08_04410 | protein=creatininase                        | protein_id=KGT45249.1 |
| gene | 848029 | 848391 | 188029 | 188391 | gene=IY08_04415 | protein=hypothetical protein                | protein_id=KGT45250.1 |
| gene | 848388 | 848807 | 188388 | 188807 | gene=IY08_04420 | protein=hypothetical protein                | protein_id=KGT45251.1 |
| gene | 849354 | 849692 | 189354 | 189692 | gene=IY08_04425 | protein=hypothetical protein                | protein_id=KGT45252.1 |
| gene | 849694 | 849912 | 189694 | 189912 | gene=IY08_04430 | protein=hypothetical protein                | protein_id=KGT45253.1 |
| gene | 850173 | 850421 | 190173 | 190421 | gene=IY08_04435 | protein=hypothetical protein                | protein_id=KGT45254.1 |
| gene | 850914 | 851582 | 190914 | 191582 | gene=IY08_04445 | protein=membrane protein                    | protein_id=KGT45255.1 |
| gene | 851700 | 851891 | 191700 | 191891 | gene=IY08_04450 | protein=hypothetical protein                | protein_id=KGT45256.1 |
| gene | 852021 | 852443 | 192021 | 192443 | gene=IY08_04455 | protein=hypothetical protein                | protein_id=KGT45257.1 |
| gene | 852478 | 853050 | 192478 | 193050 | gene=IY08_04460 | protein=hypothetical protein                | protein_id=KGT45258.1 |
| gene | 853191 | 853643 | 193191 | 193643 | gene=IY08_04470 | protein=SMI1 / KNR4 family protein          | protein_id=KGT45259.1 |
| gene | 853662 | 854108 | 193662 | 194108 | gene=IY08_04475 | protein=SMI1/KNR4 family protein            | protein_id=KGT45260.1 |
| gene | 854377 | 854634 | 194377 | 194634 | gene=IY08_04480 | protein=type IV secretion protein Rhs       | protein_id=KGT45261.1 |
| gene | 854646 | 855035 | 194646 | 195035 | gene=IY08_04485 | protein=hypothetical protein                | protein_id=KGT45262.1 |
| gene | 855300 | 855494 | 195300 | 195494 | gene=IY08_04490 | protein=hypothetical protein                | protein_id=KGT45263.1 |
| gene | 855543 | 856214 | 195543 | 196214 | gene=IY08_04495 | protein=membrane protein                    | protein_id=KGT45264.1 |
| gene | 856347 | 856493 | 196347 | 196493 | gene=IY08_04500 | protein=cytoplasmic protein                 | protein_id=KGT45265.1 |
| gene | 856915 | 857211 | 196915 | 197211 | gene=IY08_04505 | protein=type VII secretion protein EsxA     | protein_id=KGT45266.1 |
| gene | 857369 | 857632 | 197369 | 197632 | gene=IY08_04510 | protein=creatininase                        | protein_id=KGT45267.1 |
| gene | 857673 | 858035 | 197673 | 198035 | gene=IY08_04515 | protein=hypothetical protein                | protein_id=KGT45268.1 |
| gene | 858032 | 859303 | 198032 | 199303 | gene=IY08_04520 | protein=hypothetical protein                | protein_id=KGT45269.1 |
| gene | 859318 | 859527 | 199318 | 199527 | gene=IY08_04525 | protein=hypothetical protein                | protein_id=KGT45270.1 |
| gene | 859529 | 859813 | 199529 | 199813 | gene=IY08_04530 | protein=hypothetical protein                | protein_id=KGT45271.1 |
| gene | 859894 | 860274 | 199894 | 200274 | gene=IY08_04535 | protein=lipoprotein                         | protein_id=KGT45272.1 |
| gene | 860463 | 861248 | 200463 | 201248 | gene=IY08_04540 | protein=ABC transporter ATP-binding protein | protein_id=KGT45273.1 |
| gene | 861368 | 861472 | 201368 | 201472 | gene=IY08_04545 | protein=integrase                           | protein_id=KGT45274.1 |
| gene | 862164 | 862643 | 202164 | 202643 | gene=IY08_04555 | protein=hypothetical protein                | protein_id=KGT45275.1 |
| gene | 863069 | 864391 | 203069 | 204391 | gene=IY08_04560 | protein=alpha-ketoglutarate transporter     | protein_id=KGT45276.1 |

|      |        |        |        |        |                 |                                                   |                       |
|------|--------|--------|--------|--------|-----------------|---------------------------------------------------|-----------------------|
| gene | 864617 | 866206 | 204617 | 206206 | gene=IY08_04565 | protein=ATPase                                    | protein_id=KGT45277.1 |
| gene | 866226 | 866903 | 206226 | 206903 | gene=IY08_04570 | protein=transcriptional regulator                 | protein_id=KGT45278.1 |
| gene | 866900 | 867868 | 206900 | 207868 | gene=IY08_04575 | protein=membrane protein                          | protein_id=KGT45279.1 |
| gene | 868094 | 868495 | 208094 | 208495 | gene=IY08_04580 | protein=DNA mismatch repair protein MutT          | protein_id=KGT45280.1 |
| gene | 868610 | 871510 | 208610 | 211510 | gene=IY08_04585 | protein=helicase                                  | protein_id=KGT45281.1 |
| gene | 871911 | 872771 | 211911 | 212771 | gene=IY08_04590 | protein=XRE family transcriptional regulator      | protein_id=KGT45282.1 |
| gene | 872768 | 874054 | 212768 | 214054 | gene=IY08_04595 | protein=DNA helicase                              | protein_id=KGT45283.1 |
| gene | 874146 | 874931 | 214146 | 214931 | gene=IY08_04600 | protein=transcriptional regulator                 | protein_id=KGT45284.1 |
| gene | 875042 | 875809 | 215042 | 215809 | gene=IY08_04605 | protein=membrane protein                          | protein_id=KGT45285.1 |
| gene | 876042 | 878075 | 216042 | 218075 | gene=IY08_04610 | protein=Fis family transcriptional regulator      | protein_id=KGT45286.1 |
| gene | 878403 | 879161 | 218403 | 219161 | gene=IY08_04615 | protein=glutamine amidotransferase                | protein_id=KGT45287.1 |
| gene | 879314 | 880744 | 219314 | 220744 | gene=IY08_04620 | protein=C4-dicarboxylate ABC transporter permease | protein_id=KGT45288.1 |
| gene | 880972 | 881124 | 220972 | 221124 | gene=IY08_04625 | protein=hypothetical protein                      | protein_id=KGT45289.1 |
| gene | 881454 | 882029 | 221454 | 222029 | gene=IY08_04630 | protein=TetR family transcriptional regulator     | protein_id=KGT45290.1 |
| gene | 882172 | 883647 | 222172 | 223647 | gene=IY08_04635 | protein=multidrug MFS transporter                 | protein_id=KGT45291.1 |
| gene | 884167 | 884727 | 224167 | 224727 | gene=IY08_04645 | protein=hypothetical protein                      | protein_id=KGT45292.1 |
| gene | 885409 | 885954 | 225409 | 225954 | gene=IY08_04660 | protein=alanine acetyltransferase                 | protein_id=KGT45293.1 |
| gene | 885935 | 886117 | 225935 | 226117 | gene=IY08_04665 | protein=hypothetical protein                      | protein_id=KGT45294.1 |
| gene | 886563 | 887078 | 226563 | 227078 | gene=IY08_04670 | protein=cell wall anchor protein                  | protein_id=KGT45295.1 |
| gene | 887135 | 887643 | 227135 | 227643 | gene=IY08_04675 | protein=peptidase                                 | partial=3'            |
| gene | 888002 | 888280 | 228002 | 228280 | gene=IY08_04685 | protein=ArsR family transcriptional regulator     | protein_id=KGT45153.1 |
| gene | 888929 | 889345 | 228929 | 229345 | gene=IY08_04695 | protein=hypothetical protein                      | protein_id=KGT45154.1 |
| gene | 889624 | 890352 | 229624 | 230352 | gene=IY08_04700 | protein=abortive infection protein                | protein_id=KGT45155.1 |
| gene | 890875 | 891219 | 230875 | 231219 | gene=IY08_04710 | protein=hypothetical protein                      | protein_id=KGT45156.1 |
| gene | 891266 | 891589 | 231266 | 231589 | gene=IY08_04715 | protein=hypothetical protein                      | protein_id=KGT45157.1 |
| gene | 891586 | 891915 | 231586 | 231915 | gene=IY08_04720 | protein=hypothetical protein                      | protein_id=KGT45158.1 |
| gene | 892344 | 892727 | 232344 | 232727 | gene=IY08_04725 | protein=hypothetical protein                      | protein_id=KGT45159.1 |
| gene | 892729 | 893892 | 232729 | 233892 | gene=IY08_04730 | protein=hypothetical protein                      | protein_id=KGT45160.1 |
| gene | 894003 | 894333 | 234003 | 234333 | gene=IY08_04735 | protein=beta-lactamase                            | frame=2               |
| gene | 894410 | 894793 | 234410 | 234793 | gene=IY08_04740 | protein=beta-lactamase                            | protein_id=KGT45147.1 |
| gene | 894870 | 895253 | 234870 | 235253 | gene=IY08_04745 | protein=beta-lactamase                            | protein_id=KGT45148.1 |

|      |        |        |        |        |                 |                                               |                       |
|------|--------|--------|--------|--------|-----------------|-----------------------------------------------|-----------------------|
| gene | 895469 | 896851 | 235469 | 236851 | gene=IY08_04750 | protein=hydrolase                             | protein_id=KGT45149.1 |
| gene | 898325 | 898975 | 238325 | 238975 | gene=IY08_04760 | protein=hypothetical protein                  | protein_id=KGT45150.1 |
| gene | 899842 | 900276 | 239842 | 240276 | gene=IY08_04765 | protein=sodium:proton symporter               | protein_id=KGT45151.1 |
| gene | 900514 | 901187 | 240514 | 241187 | gene=IY08_04770 | protein=FMN-dependent NADH-azoreductase       | partial=3'            |
| gene | 901801 | 901926 | 241801 | 241926 | gene=IY08_04775 | protein=hypothetical protein                  | protein_id=KGT45095.1 |
| gene | 902124 | 902384 | 242124 | 242384 | gene=IY08_04780 | protein=transporter                           | protein_id=KGT45096.1 |
| gene | 902723 | 904132 | 242723 | 244132 | gene=IY08_04785 | protein=carboxylic ester hydrolase            | protein_id=KGT45097.1 |
| gene | 904305 | 904406 | 244305 | 244406 | gene=IY08_04790 | protein=hypothetical protein                  | protein_id=KGT45098.1 |
| gene | 904760 | 905026 | 244760 | 245026 | gene=IY08_04800 | protein=hypothetical protein                  | protein_id=KGT45099.1 |
| gene | 905409 | 905765 | 245409 | 245765 | gene=IY08_04805 | protein=MarR family transcriptional regulator | protein_id=KGT45100.1 |
| gene | 905930 | 906388 | 245930 | 246388 | gene=IY08_04810 | protein=MarR family transcriptional regulator | protein_id=KGT45101.1 |
| gene | 906432 | 906965 | 246432 | 246965 | gene=IY08_04815 | protein=CDP-diacylglycerol--serine O-         | protein_id=KGT45102.1 |
| gene | 907005 | 907376 | 247005 | 247376 | gene=IY08_04820 | protein=ATP synthase subunit I                | protein_id=KGT45103.1 |
| gene | 907670 | 908323 | 247670 | 248323 | gene=IY08_04825 | protein=membrane protein                      | protein_id=KGT45104.1 |
| gene | 908682 | 909320 | 248682 | 249320 | gene=IY08_04830 | protein=VanZ family protein                   | protein_id=KGT45105.1 |
| gene | 909420 | 910418 | 249420 | 250418 | gene=IY08_04835 | protein=DhaKLM operon coactivator DhaQ        | protein_id=KGT45106.1 |
| gene | 910438 | 911004 | 250438 | 251004 | gene=IY08_04840 | protein=TetR family transcriptional regulator | protein_id=KGT45107.1 |
| gene | 911183 | 912934 | 251183 | 252934 | gene=IY08_04845 | protein=hypothetical protein                  | protein_id=KGT45108.1 |
| gene | 913164 | 913514 | 253164 | 253514 | gene=IY08_04850 | protein=antifungal polypeptide                | protein_id=KGT45109.1 |
| gene | 913707 | 914258 | 253707 | 254258 | gene=IY08_04855 | protein=hypothetical protein                  | protein_id=KGT45110.1 |
| gene | 914551 | 914940 | 254551 | 254940 | gene=IY08_04860 | protein=hypothetical protein                  | protein_id=KGT45111.1 |
| gene | 915511 | 916401 | 255511 | 256401 | gene=IY08_04865 | protein=DNA-binding protein                   | protein_id=KGT45112.1 |
| gene | 917007 | 917171 | 257007 | 257171 | gene=IY08_04875 | protein=cell division protein                 | protein_id=KGT45113.1 |
| gene | 917651 | 919384 | 257651 | 259384 | gene=IY08_04880 | protein=S-layer protein                       | protein_id=KGT45114.1 |
| gene | 919536 | 920153 | 259536 | 260153 | gene=IY08_04885 | protein=hypothetical protein                  | protein_id=KGT45115.1 |
| gene | 920722 | 921699 | 260722 | 261699 | gene=IY08_04890 | protein=membrane protein                      | protein_id=KGT45116.1 |
| gene | 921703 | 922233 | 261703 | 262233 | gene=IY08_04895 | protein=RNA polymerase sigma factor SigX      | protein_id=KGT45117.1 |
| gene | 923261 | 923674 | 263261 | 263674 | gene=IY08_04905 | protein=hypothetical protein                  | protein_id=KGT45118.1 |
| gene | 923757 | 924212 | 263757 | 264212 | gene=IY08_04910 | protein=lipoprotein                           | protein_id=KGT45119.1 |
| gene | 924426 | 924815 | 264426 | 264815 | gene=IY08_04915 | protein=general stress protein                | protein_id=KGT45120.1 |
| gene | 924866 | 925066 | 264866 | 265066 | gene=IY08_04920 | protein=hypothetical protein                  | protein_id=KGT45121.1 |

|      |        |        |        |        |                 |                                                     |                       |
|------|--------|--------|--------|--------|-----------------|-----------------------------------------------------|-----------------------|
| gene | 925142 | 925393 | 265142 | 265393 | gene=IY08_04925 | protein=membrane protein                            | protein_id=KGT45122.1 |
| gene | 925574 | 925774 | 265574 | 265774 | gene=IY08_04930 | protein=methyltransferase                           | protein_id=KGT45123.1 |
| gene | 925971 | 926309 | 265971 | 266309 | gene=IY08_04935 | protein=metal ABC transporter ATPase                | protein_id=KGT45124.1 |
| gene | 926316 | 926798 | 266316 | 266798 | gene=IY08_04940 | protein=serine/threonine protein kinase             | protein_id=KGT45125.1 |
| gene | 926764 | 927537 | 266764 | 267537 | gene=IY08_04945 | protein=RNA polymerase sigma factor SigB            | protein_id=KGT45126.1 |
| gene | 927607 | 928047 | 267607 | 268047 | gene=IY08_04950 | protein=bacterioferritin                            | protein_id=KGT45127.1 |
| gene | 928223 | 929365 | 268223 | 269365 | gene=IY08_04955 | protein=response regulator                          | protein_id=KGT45128.1 |
| gene | 929549 | 930406 | 269549 | 270406 | gene=IY08_04960 | protein=chemotaxis protein CheR                     | protein_id=KGT45129.1 |
| gene | 930423 | 933113 | 270423 | 273113 | gene=IY08_04965 | protein=histidine kinase                            | protein_id=KGT45130.1 |
| gene | 933318 | 933569 | 273318 | 273569 | gene=IY08_04970 | protein=hypothetical protein                        | protein_id=KGT45131.1 |
| gene | 933806 | 933946 | 273806 | 273946 | gene=IY08_04975 | protein=hypothetical protein                        | protein_id=KGT45132.1 |
| gene | 933983 | 934513 | 273983 | 274513 | gene=IY08_04980 | protein=general stress protein                      | protein_id=KGT45133.1 |
| gene | 934652 | 934855 | 274652 | 274855 | gene=IY08_04985 | protein=hypothetical protein                        | protein_id=KGT45134.1 |
| gene | 934994 | 935305 | 274994 | 275305 | gene=IY08_04990 | protein=hypothetical protein                        | protein_id=KGT45135.1 |
| gene | 935969 | 936274 | 275969 | 276274 | gene=IY08_05000 | protein=hypothetical protein                        | protein_id=KGT45136.1 |
| gene | 936392 | 937384 | 276392 | 277384 | gene=IY08_05005 | protein=alcohol dehydrogenase                       | protein_id=KGT45137.1 |
| gene | 937534 | 938520 | 277534 | 278520 | gene=IY08_05010 | protein=choloylglycine hydrolase                    | protein_id=KGT45138.1 |
| gene | 938642 | 938782 | 278642 | 278782 | gene=IY08_05015 | protein=hypothetical protein                        | protein_id=KGT45139.1 |
| gene | 938936 | 939298 | 278936 | 279298 | gene=IY08_05025 | protein=hypothetical protein                        | protein_id=KGT45140.1 |
| gene | 939325 | 939510 | 279325 | 279510 | gene=IY08_05030 | protein=hypothetical protein                        | protein_id=KGT45141.1 |
| gene | 939719 | 940960 | 279719 | 280960 | gene=IY08_05035 | protein=DNA repair exonuclease                      | protein_id=KGT45142.1 |
| gene | 940957 | 943881 | 280957 | 283881 | gene=IY08_05040 | protein=DNA double-strand break repair Rad50 ATPase | protein_id=KGT45143.1 |
| gene | 943923 | 944867 | 283923 | 284867 | gene=IY08_05045 | protein=3'-5' exonuclease                           | protein_id=KGT45144.1 |
| gene | 945162 | 946589 | 285162 | 286589 | gene=IY08_05050 | protein=beta-lactamase                              | protein_id=KGT45145.1 |
| gene | 947249 | 947449 | 287249 | 287449 | gene=IY08_05055 | protein=hypothetical protein                        | protein_id=KGT45053.1 |
| gene | 947472 | 947660 | 287472 | 287660 | gene=IY08_05060 | protein=hypothetical protein                        | protein_id=KGT45054.1 |
| gene | 948282 | 949226 | 288282 | 289226 | gene=IY08_05065 | protein=glyoxalase                                  | protein_id=KGT45055.1 |
| gene | 949282 | 950259 | 289282 | 290259 | gene=IY08_05070 | protein=glyoxalase                                  | protein_id=KGT45056.1 |
| gene | 950515 | 951609 | 290515 | 291609 | gene=IY08_05075 | protein=histidine kinase                            | protein_id=KGT45057.1 |
| gene | 951609 | 951812 | 291609 | 291812 | gene=IY08_05080 | protein=aspartate phosphatase                       | protein_id=KGT45058.1 |
| gene | 952053 | 952925 | 292053 | 292925 | gene=IY08_05085 | protein=alpha/beta hydrolase                        | protein_id=KGT45059.1 |

|      |        |        |        |        |                 |                                                        |                       |
|------|--------|--------|--------|--------|-----------------|--------------------------------------------------------|-----------------------|
| gene | 953004 | 953204 | 293004 | 293204 | gene=IY08_05090 | protein=SigE-dependent sporulation protein             | protein_id=KGT45060.1 |
| gene | 953421 | 954272 | 293421 | 294272 | gene=IY08_05095 | protein=hypothetical protein                           | protein_id=KGT45061.1 |
| gene | 954546 | 955211 | 294546 | 295211 | gene=IY08_05100 | protein=hypothetical protein                           | protein_id=KGT45062.1 |
| gene | 955570 | 956763 | 295570 | 296763 | gene=IY08_05110 | protein=oxalate decarboxylase                          | protein_id=KGT45063.1 |
| gene | 957030 | 957479 | 297030 | 297479 | gene=IY08_05115 | protein=XRE family transcriptional regulator           | protein_id=KGT45064.1 |
| gene | 957577 | 958137 | 297577 | 298137 | gene=IY08_05120 | protein=glycerol-3-phosphate responsive antiterminator | protein_id=KGT45065.1 |
| gene | 958364 | 959185 | 298364 | 299185 | gene=IY08_05125 | protein=glycerol transporter                           | protein_id=KGT45066.1 |
| gene | 959199 | 960689 | 299199 | 300689 | gene=glpK       | protein=glycerol kinase                                | protein_id=KGT45067.1 |
| gene | 960823 | 962505 | 300823 | 302505 | gene=IY08_05135 | protein=glycerol-3-phosphate dehydrogenase             | protein_id=KGT45068.1 |
| gene | 962623 | 962955 | 302623 | 302955 | gene=IY08_05140 | protein=PadR family transcriptional regulator          | protein_id=KGT45069.1 |
| gene | 962948 | 963721 | 302948 | 303721 | gene=IY08_05145 | protein=teicoplanin resistance protein VanZ            | protein_id=KGT45070.1 |
| gene | 964050 | 964214 | 304050 | 304214 | gene=IY08_05150 | protein=hypothetical protein                           | protein_id=KGT45071.1 |
| gene | 964495 | 965028 | 304495 | 305028 | gene=IY08_05155 | protein=RNA polymerase factor sigma C                  | protein_id=KGT45072.1 |
| gene | 965033 | 965440 | 305033 | 305440 | gene=lstR       | protein=lineage-specific thermal regulator protein     | protein_id=KGT45073.1 |
| gene | 965448 | 966713 | 305448 | 306713 | gene=IY08_05165 | protein=cell division protein FtsW                     | protein_id=KGT45074.1 |
| gene | 967109 | 967993 | 307109 | 307993 | gene=IY08_05175 | protein=ATPase                                         | protein_id=KGT45075.1 |
| gene | 968091 | 970427 | 308091 | 310427 | gene=IY08_05180 | protein=helicase                                       | protein_id=KGT45076.1 |
| gene | 970824 | 971693 | 310824 | 311693 | gene=prsA       | protein=peptidylprolyl isomerase                       | protein_id=KGT45077.1 |
| gene | 971813 | 972025 | 311813 | 312025 | gene=IY08_05190 | protein=hypothetical protein                           | protein_id=KGT45078.1 |
| gene | 972117 | 972311 | 312117 | 312311 | gene=IY08_05195 | protein=hypothetical protein                           | protein_id=KGT45079.1 |
| gene | 972427 | 972762 | 312427 | 312762 | gene=IY08_05200 | protein=wall-associated protein                        | protein_id=KGT45080.1 |
| gene | 972768 | 973325 | 312768 | 313325 | gene=IY08_05205 | protein=transcriptional regulator Hpr                  | protein_id=KGT45081.1 |
| gene | 973625 | 973987 | 313625 | 313987 | gene=IY08_05210 | protein=general stress protein                         | protein_id=KGT45082.1 |
| gene | 974167 | 974601 | 314167 | 314601 | gene=IY08_05215 | protein=protein hit                                    | protein_id=KGT45083.1 |
| gene | 975164 | 975907 | 315164 | 315907 | gene=IY08_05220 | protein=multidrug ABC transporter ATP-binding protein  | protein_id=KGT45084.1 |
| gene | 975900 | 977111 | 315900 | 317111 | gene=IY08_05225 | protein=ABC transporter permease                       | protein_id=KGT45085.1 |
| gene | 977125 | 977832 | 317125 | 317832 | gene=IY08_05230 | protein=ecsC                                           | protein_id=KGT45086.1 |
| gene | 978172 | 978753 | 318172 | 318753 | gene=IY08_05240 | protein=TetR family transcriptional regulator          | protein_id=KGT45087.1 |
| gene | 978756 | 978923 | 318756 | 318923 | gene=IY08_05245 | protein=hypothetical protein                           | protein_id=KGT45088.1 |
| gene | 979003 | 979479 | 319003 | 319479 | gene=IY08_05250 | protein=membrane protein                               | protein_id=KGT45089.1 |
| gene | 979472 | 980914 | 319472 | 320914 | gene=IY08_05255 | protein=membrane protein                               | protein_id=KGT45090.1 |

|      |         |         |        |        |                 |                                               |                       |
|------|---------|---------|--------|--------|-----------------|-----------------------------------------------|-----------------------|
| gene | 981115  | 981768  | 321115 | 321768 | gene=IY08_05260 | protein=membrane protein                      | protein_id=KGT45091.1 |
| gene | 981993  | 982418  | 321993 | 322418 | gene=IY08_05265 | protein=hypothetical protein                  | protein_id=KGT45092.1 |
| gene | 982870  | 983424  | 322870 | 323424 | gene=IY08_05270 | protein=TetR family transcriptional regulator | protein_id=KGT45093.1 |
| gene | 983731  | 987681  | 323731 | 327681 | gene=IY08_05275 | protein=adhesin                               | partial=3'            |
| gene | 987745  | 989655  | 327745 | 329655 | gene=IY08_05280 | protein=adhesin                               | partial=5'            |
| gene | 990134  | 990871  | 330134 | 330871 | gene=IY08_05285 | protein=hypothetical protein                  | protein_id=KGT44938.1 |
| gene | 990868  | 991614  | 330868 | 331614 | gene=IY08_05290 | protein=3-oxoacyl-ACP reductase               | protein_id=KGT44939.1 |
| gene | 991703  | 992644  | 331703 | 332644 | gene=IY08_05295 | protein=transporter                           | protein_id=KGT44940.1 |
| gene | 992875  | 993351  | 332875 | 333351 | gene=IY08_05300 | protein=membrane protein                      | protein_id=KGT44941.1 |
| gene | 993344  | 994759  | 333344 | 334759 | gene=IY08_05305 | protein=membrane protein                      | protein_id=KGT44942.1 |
| gene | 995065  | 995568  | 335065 | 335568 | gene=IY08_05310 | protein=histidine kinase                      | protein_id=KGT44943.1 |
| gene | 995696  | 997813  | 335696 | 337813 | gene=IY08_05315 | protein=penicillin-binding protein            | protein_id=KGT44944.1 |
| gene | 997991  | 999037  | 337991 | 339037 | gene=IY08_05320 | protein=uroporphyrinogen decarboxylase        | protein_id=KGT44945.1 |
| gene | 999052  | 999987  | 339052 | 339987 | gene=IY08_05325 | protein=ferrochelataase                       | protein_id=KGT44946.1 |
| gene | 1000007 | 1001428 | 340007 | 341428 | gene=IY08_05330 | protein=protoporphyrinogen oxidase            | protein_id=KGT44947.1 |
| gene | 1001485 | 1002837 | 341485 | 342837 | gene=IY08_05335 | protein=hypothetical protein                  | protein_id=KGT44948.1 |
| gene | 1003079 | 1005445 | 343079 | 345445 | gene=IY08_05340 | protein=endonuclease                          | protein_id=KGT44949.1 |
| gene | 1005578 | 1005877 | 345578 | 345877 | gene=IY08_05345 | protein=hypothetical protein                  | protein_id=KGT44950.1 |
| gene | 1005931 | 1006776 | 345931 | 346776 | gene=IY08_05350 | protein=membrane protein                      | protein_id=KGT44951.1 |
| gene | 1007006 | 1007407 | 347006 | 347407 | gene=IY08_05355 | protein=beta-lactamase repressor              | protein_id=KGT44952.1 |
| gene | 1007410 | 1009308 | 347410 | 349308 | gene=IY08_05360 | protein=methicillin resistance protein        | protein_id=KGT44953.1 |
| gene | 1009522 | 1010094 | 349522 | 350094 | gene=IY08_05365 | protein=TetR family transcriptional regulator | protein_id=KGT44954.1 |
| gene | 1010311 | 1013646 | 350311 | 353646 | gene=IY08_05370 | protein=phage infection protein               | protein_id=KGT44955.1 |
| gene | 1013790 | 1014002 | 353790 | 354002 | gene=IY08_05375 | protein=hypothetical protein                  | protein_id=KGT44956.1 |
| gene | 1014006 | 1014311 | 354006 | 354311 | gene=IY08_05380 | protein=transcriptional regulator             | protein_id=KGT44957.1 |
| gene | 1014338 | 1014691 | 354338 | 354691 | gene=IY08_05385 | protein=PlcR-regulated protein PRP2           | protein_id=KGT44958.1 |
| gene | 1014825 | 1015334 | 354825 | 355334 | gene=IY08_05390 | protein=acetyltransferase                     | protein_id=KGT44959.1 |
| gene | 1015529 | 1016542 | 355529 | 356542 | gene=IY08_05395 | protein=LacI family transcriptional regulator | protein_id=KGT44960.1 |
| gene | 1016582 | 1016710 | 356582 | 356710 | gene=IY08_05400 | protein=hypothetical protein                  | protein_id=KGT44961.1 |
| gene | 1016891 | 1017625 | 356891 | 357625 | gene=IY08_05405 | protein=hypothetical protein                  | protein_id=KGT44962.1 |
| gene | 1017635 | 1018624 | 357635 | 358624 | gene=IY08_05410 | protein=lipoate--protein ligase               | protein_id=KGT44963.1 |

|      |         |         |        |        |                 |                                                     |                       |
|------|---------|---------|--------|--------|-----------------|-----------------------------------------------------|-----------------------|
| gene | 1018885 | 1019313 | 358885 | 359313 | gene=IY08_05415 | protein=lipoprotein                                 | protein_id=KGT44964.1 |
| gene | 1019475 | 1021007 | 359475 | 361007 | gene=IY08_05420 | protein=long-chain fatty acid--CoA ligase           | protein_id=KGT44965.1 |
| gene | 1021175 | 1021351 | 361175 | 361351 | gene=IY08_05425 | protein=S-layer protein                             | protein_id=KGT44966.1 |
| gene | 1021526 | 1022581 | 361526 | 362581 | gene=IY08_05430 | protein=sulfate transporter subunit                 | protein_id=KGT44967.1 |
| gene | 1022614 | 1023441 | 362614 | 363441 | gene=IY08_05435 | protein=sulfate ABC transporter permease            | protein_id=KGT44968.1 |
| gene | 1023453 | 1024310 | 363453 | 364310 | gene=IY08_05440 | protein=sulfate ABC transporter permease            | protein_id=KGT44969.1 |
| gene | 1024322 | 1025395 | 364322 | 365395 | gene=IY08_05445 | protein=sulfate ABC transporter ATP-binding protein | protein_id=KGT44970.1 |
| gene | 1025437 | 1026447 | 365437 | 366447 | gene=IY08_05450 | protein=cytotoxin                                   | protein_id=KGT44971.1 |
| gene | 1026739 | 1027845 | 366739 | 367845 | gene=IY08_05460 | protein=phosphoesterase                             | protein_id=KGT44972.1 |
| gene | 1027980 | 1028957 | 367980 | 368957 | gene=IY08_05465 | protein=hypothetical protein                        | protein_id=KGT44973.1 |
| gene | 1029001 | 1030125 | 369001 | 370125 | gene=IY08_05470 | protein=sigma-M negative effector                   | protein_id=KGT44974.1 |
| gene | 1030131 | 1030616 | 370131 | 370616 | gene=IY08_05475 | protein=RNA polymerase sigma factor                 | protein_id=KGT44975.1 |
| gene | 1030754 | 1031656 | 370754 | 371656 | gene=IY08_05480 | protein=AraC family transcriptional regulator       | protein_id=KGT44976.1 |
| gene | 1032402 | 1034144 | 372402 | 374144 | gene=IY08_05495 | protein=histidine kinase                            | protein_id=KGT44977.1 |
| gene | 1034154 | 1034858 | 374154 | 374858 | gene=IY08_05500 | protein=transcriptional regulator                   | protein_id=KGT44978.1 |
| gene | 1034999 | 1035847 | 374999 | 375847 | gene=IY08_05505 | protein=CAAX protease                               | protein_id=KGT44979.1 |
| gene | 1035849 | 1036205 | 375849 | 376205 | gene=IY08_05510 | protein=hypothetical protein                        | protein_id=KGT44980.1 |
| gene | 1036237 | 1036536 | 376237 | 376536 | gene=IY08_05515 | protein=hypothetical protein                        | protein_id=KGT44981.1 |
| gene | 1036765 | 1038033 | 376765 | 378033 | gene=IY08_05520 | protein=peptidase M48                               | protein_id=KGT44982.1 |
| gene | 1038170 | 1039897 | 378170 | 379897 | gene=IY08_05525 | protein=chemotaxis protein                          | protein_id=KGT44983.1 |
| gene | 1040338 | 1040994 | 380338 | 380994 | gene=IY08_05530 | protein=S-layer protein                             | protein_id=KGT44984.1 |
| gene | 1041238 | 1041900 | 381238 | 381900 | gene=IY08_05540 | protein=S-layer protein                             | protein_id=KGT44985.1 |
| gene | 1042120 | 1043709 | 382120 | 383709 | gene=IY08_05545 | protein=malate synthase                             | protein_id=KGT44986.1 |
| gene | 1043733 | 1045010 | 383733 | 385010 | gene=IY08_05550 | protein=isocitrate lyase                            | protein_id=KGT44987.1 |
| gene | 1045120 | 1045911 | 385120 | 385911 | gene=IY08_05555 | protein=aminoglycoside phosphotransferase           | protein_id=KGT44988.1 |
| gene | 1045931 | 1046425 | 385931 | 386425 | gene=IY08_05560 | protein=DNA helicase                                | protein_id=KGT44989.1 |
| gene | 1046709 | 1046912 | 386709 | 386912 | gene=IY08_05565 | protein=cold-shock protein                          | protein_id=KGT44990.1 |
| gene | 1047110 | 1047313 | 387110 | 387313 | gene=IY08_05570 | protein=hypothetical protein                        | protein_id=KGT44991.1 |
| gene | 1047662 | 1047847 | 387662 | 387847 | gene=IY08_05575 | protein=ATPase                                      | protein_id=KGT44992.1 |
| gene | 1048132 | 1048713 | 388132 | 388713 | gene=IY08_05585 | protein=competence protein                          | protein_id=KGT44993.1 |
| gene | 1049050 | 1049643 | 389050 | 389643 | gene=IY08_05590 | protein=hypothetical protein                        | protein_id=KGT44994.1 |



|      |         |         |        |        |                 |                                              |                       |
|------|---------|---------|--------|--------|-----------------|----------------------------------------------|-----------------------|
| gene | 1049700 | 1050263 | 389700 | 390263 | gene=IY08_05595 | protein=signal peptidase                     | protein_id=KGT44995.1 |
| gene | 1050380 | 1053895 | 390380 | 393895 | gene=IY08_05600 | protein=ATP-dependent helicase               | protein_id=KGT44996.1 |
| gene | 1053892 | 1057617 | 393892 | 397617 | gene=IY08_05605 | protein=ATP-dependent helicase               | protein_id=KGT44997.1 |
| gene | 1057630 | 1057917 | 397630 | 397917 | gene=IY08_05610 | protein=hypothetical protein                 | protein_id=KGT44998.1 |
| gene | 1058055 | 1058270 | 398055 | 398270 | gene=IY08_05615 | protein=spore germination protein GerPF      | protein_id=KGT44999.1 |
| gene | 1058313 | 1058699 | 398313 | 398699 | gene=IY08_05620 | protein=spore germination protein GerPE      | protein_id=KGT45000.1 |
| gene | 1058715 | 1058909 | 398715 | 398909 | gene=IY08_05625 | protein=spore germination protein GerPD      | protein_id=KGT45001.1 |
| gene | 1058916 | 1059530 | 398916 | 399530 | gene=IY08_05630 | protein=spore germination protein GerPC      | protein_id=KGT45002.1 |
| gene | 1059598 | 1059804 | 399598 | 399804 | gene=IY08_05635 | protein=spore germination protein GerPB      | protein_id=KGT45003.1 |
| gene | 1059819 | 1060040 | 399819 | 400040 | gene=IY08_05640 | protein=spore germination protein GerPA      | protein_id=KGT45004.1 |
| gene | 1060137 | 1060316 | 400137 | 400316 | gene=IY08_05645 | protein=stage 0 sporulation protein          | protein_id=KGT45005.1 |
| gene | 1060563 | 1061462 | 400563 | 401462 | gene=IY08_05650 | protein=hypothetical protein                 | protein_id=KGT45006.1 |
| gene | 1061498 | 1061782 | 401498 | 401782 | gene=IY08_05655 | protein=hypothetical protein                 | protein_id=KGT45007.1 |
| gene | 1061892 | 1063082 | 401892 | 403082 | gene=rocD       | protein=ornithine--oxo-acid aminotransferase | protein_id=KGT45008.1 |
| gene | 1063233 | 1063601 | 403233 | 403601 | gene=IY08_05665 | protein=hypothetical protein                 | protein_id=KGT45009.1 |
| gene | 1063657 | 1064211 | 403657 | 404211 | gene=IY08_05670 | protein=hypothetical protein                 | protein_id=KGT45010.1 |
| gene | 1064450 | 1066297 | 404450 | 406297 | gene=IY08_05675 | protein=asparagine synthase                  | protein_id=KGT45011.1 |
| gene | 1066485 | 1067444 | 406485 | 407444 | gene=IY08_05680 | protein=ferrochelatase                       | protein_id=KGT45012.1 |
| gene | 1067504 | 1068970 | 407504 | 408970 | gene=IY08_05685 | protein=catalase                             | protein_id=KGT45013.1 |
| gene | 1069235 | 1070467 | 409235 | 410467 | gene=IY08_05690 | protein=ammonia channel protein              | protein_id=KGT45014.1 |
| gene | 1070687 | 1071982 | 410687 | 411982 | gene=IY08_05700 | protein=alpha-amylase                        | protein_id=KGT45015.1 |
| gene | 1072923 | 1073414 | 412923 | 413414 | gene=IY08_05705 | protein=hypothetical protein                 | protein_id=KGT45016.1 |
| gene | 1073645 | 1074499 | 413645 | 414499 | gene=IY08_05710 | protein=hypothetical protein                 | protein_id=KGT45017.1 |
| gene | 1074553 | 1075410 | 414553 | 415410 | gene=prsA       | protein=peptidylprolyl isomerase             | protein_id=KGT45018.1 |
| gene | 1075540 | 1075671 | 415540 | 415671 | gene=IY08_05720 | protein=hypothetical protein                 | protein_id=KGT45019.1 |
| gene | 1075772 | 1076629 | 415772 | 416629 | gene=IY08_05725 | protein=membrane protein                     | protein_id=KGT45020.1 |
| gene | 1076655 | 1076852 | 416655 | 416852 | gene=IY08_05730 | protein=hypothetical protein                 | protein_id=KGT45021.1 |
| gene | 1076853 | 1076993 | 416853 | 416993 | gene=IY08_05735 | protein=competence protein                   | protein_id=KGT45022.1 |
| gene | 1077099 | 1077908 | 417099 | 417908 | gene=IY08_05740 | protein=haloacid dehalogenase                | protein_id=KGT45023.1 |
| gene | 1078003 | 1078137 | 418003 | 418137 | gene=IY08_05745 | protein=hypothetical protein                 | protein_id=KGT45024.1 |
| gene | 1078399 | 1078578 | 418399 | 418578 | gene=IY08_05750 | protein=hypothetical protein                 | protein_id=KGT45025.1 |

|      |         |         |        |        |                 |                                                           |                       |
|------|---------|---------|--------|--------|-----------------|-----------------------------------------------------------|-----------------------|
| gene | 1078788 | 1081388 | 418788 | 421388 | gene=IY08_05755 | protein=protein disaggregation chaperone                  | protein_id=KGT45026.1 |
| gene | 1081428 | 1081610 | 421428 | 421610 | gene=IY08_05760 | protein=DeoR family transcriptional regulator             | protein_id=KGT45027.1 |
| gene | 1081767 | 1082501 | 421767 | 422501 | gene=IY08_05765 | protein=hydrolase                                         | protein_id=KGT45028.1 |
| gene | 1082531 | 1083403 | 422531 | 423403 | gene=IY08_05770 | protein=UDP-glucose 4-epimerase                           | protein_id=KGT45029.1 |
| gene | 1083458 | 1083634 | 423458 | 423634 | gene=IY08_05775 | protein=competence protein ComG                           | protein_id=KGT45030.1 |
| gene | 1083855 | 1084787 | 423855 | 424787 | gene=IY08_05780 | protein=3-oxoacyl-ACP synthase                            | protein_id=KGT45031.1 |
| gene | 1084819 | 1086057 | 424819 | 426057 | gene=IY08_05785 | protein=3-oxoacyl-ACP synthase                            | protein_id=KGT45032.1 |
| gene | 1086164 | 1086952 | 426164 | 426952 | gene=IY08_05790 | protein=cytoplasmic protein                               | protein_id=KGT45033.1 |
| gene | 1087096 | 1087842 | 427096 | 427842 | gene=IY08_05795 | protein=hypothetical protein                              | protein_id=KGT45034.1 |
| gene | 1087865 | 1088047 | 427865 | 428047 | gene=IY08_05800 | protein=MerR family transcriptional regulator             | protein_id=KGT45035.1 |
| gene | 1088122 | 1089111 | 428122 | 429111 | gene=IY08_05805 | protein=tryptophanyl-tRNA synthetase                      | protein_id=KGT45036.1 |
| gene | 1089510 | 1089890 | 429510 | 429890 | gene=IY08_05810 | protein=transporter                                       | protein_id=KGT45037.1 |
| gene | 1090210 | 1091865 | 430210 | 431865 | gene=IY08_05815 | protein=peptide ABC transporter substrate-binding protein | protein_id=KGT45038.1 |
| gene | 1091994 | 1092923 | 431994 | 432923 | gene=IY08_05820 | protein=peptide ABC transporter permease                  | protein_id=KGT45039.1 |
| gene | 1092920 | 1093936 | 432920 | 433936 | gene=IY08_05825 | protein=peptide ABC transporter permease                  | protein_id=KGT45040.1 |
| gene | 1093955 | 1094998 | 433955 | 434998 | gene=IY08_05830 | protein=peptide ABC transporter ATP-binding protein       | protein_id=KGT45041.1 |
| gene | 1094991 | 1095926 | 434991 | 435926 | gene=IY08_05835 | protein=peptide ABC transporter ATP-binding protein       | protein_id=KGT45042.1 |
| gene | 1096070 | 1097515 | 436070 | 437515 | gene=IY08_05840 | protein=multidrug transporter MatE                        | protein_id=KGT45043.1 |
| gene | 1097868 | 1099514 | 437868 | 439514 | gene=IY08_05845 | protein=peptide ABC transporter substrate-binding protein | protein_id=KGT45044.1 |
| gene | 1099544 | 1099747 | 439544 | 439747 | gene=IY08_05850 | protein=hypothetical protein                              | protein_id=KGT45045.1 |
| gene | 1100068 | 1100226 | 440068 | 440226 | gene=IY08_05855 | protein=hypothetical protein                              | protein_id=KGT45046.1 |
| gene | 1100341 | 1100736 | 440341 | 440736 | gene=IY08_05860 | protein=ArsR family transcriptional regulator             | protein_id=KGT45047.1 |
| gene | 1100786 | 1101460 | 440786 | 441460 | gene=IY08_05865 | protein=membrane protein                                  | protein_id=KGT45048.1 |
| gene | 1101806 | 1102489 | 441806 | 442489 | gene=IY08_05870 | protein=adaptor protein                                   | protein_id=KGT45049.1 |
| gene | 1102562 | 1104106 | 442562 | 444106 | gene=IY08_05875 | protein=cardiolipin synthetase                            | protein_id=KGT45050.1 |
| gene | 1104187 | 1105431 | 444187 | 445431 | gene=IY08_05880 | protein=competence protein                                | protein_id=KGT45051.1 |
| gene | 1105483 | 1107309 | 445483 | 447309 | gene=IY08_05885 | protein=oligopeptidase PepB                               | protein_id=KGT45052.1 |
| gene | 1107482 | 1107655 | 447482 | 447655 | gene=IY08_05890 | protein=hypothetical protein                              | protein_id=KGT44756.1 |
| gene | 1107885 | 1108778 | 447885 | 448778 | gene=IY08_05895 | protein=hypothetical protein                              | protein_id=KGT44757.1 |
| gene | 1108778 | 1109176 | 448778 | 449176 | gene=IY08_05900 | protein=globin                                            | protein_id=KGT44758.1 |
| gene | 1109345 | 1109923 | 449345 | 449923 | gene=IY08_05905 | protein=hypothetical protein                              | protein_id=KGT44759.1 |

|      |         |         |        |        |                 |                                                           |                       |
|------|---------|---------|--------|--------|-----------------|-----------------------------------------------------------|-----------------------|
| gene | 1110068 | 1110439 | 450068 | 450439 | gene=IY08_05910 | protein=hypothetical protein                              | protein_id=KGT44760.1 |
| gene | 1110470 | 1111108 | 450470 | 451108 | gene=IY08_05915 | protein=GTP pyrophosphokinase                             | protein_id=KGT44761.1 |
| gene | 1111127 | 1111924 | 451127 | 451924 | gene=ppnK       | protein=inorganic polyphosphate kinase                    | protein_id=KGT44762.1 |
| gene | 1111939 | 1112832 | 451939 | 452832 | gene=IY08_05925 | protein=pseudouridine synthase                            | protein_id=KGT44763.1 |
| gene | 1112881 | 1114269 | 452881 | 454269 | gene=IY08_05930 | protein=peptidase G2                                      | protein_id=KGT44764.1 |
| gene | 1114393 | 1115133 | 454393 | 455133 | gene=IY08_05935 | protein=bis(5'-nucleosyl)-tetrphosphatase                 | protein_id=KGT44765.1 |
| gene | 1115210 | 1116370 | 455210 | 456370 | gene=IY08_05940 | protein=cell division protein FtsW                        | protein_id=KGT44766.1 |
| gene | 1116609 | 1117535 | 456609 | 457535 | gene=IY08_05945 | protein=glycosyl transferase family 2                     | protein_id=KGT44767.1 |
| gene | 1117549 | 1118301 | 457549 | 458301 | gene=IY08_05950 | protein=methyltransferase                                 | protein_id=KGT44768.1 |
| gene | 1118485 | 1119330 | 458485 | 459330 | gene=IY08_05955 | protein=macrocin-O-methyltransferase                      | protein_id=KGT44769.1 |
| gene | 1119453 | 1120313 | 459453 | 460313 | gene=IY08_05960 | protein=triple helix repeat-containing collagen           | protein_id=KGT44770.1 |
| gene | 1120479 | 1121576 | 460479 | 461576 | gene=IY08_05965 | protein=beta 1,4 glucosyltransferase                      | protein_id=KGT44771.1 |
| gene | 1121789 | 1122478 | 461789 | 462478 | gene=IY08_05970 | protein=SAM-dependent methyltransferase                   | protein_id=KGT44772.1 |
| gene | 1122475 | 1123161 | 462475 | 463161 | gene=IY08_05975 | protein=streptomycin biosynthesis protein StrF            | protein_id=KGT44773.1 |
| gene | 1123176 | 1123856 | 463176 | 463856 | gene=IY08_05980 | protein=streptomycin biosynthesis protein StrF            | protein_id=KGT44774.1 |
| gene | 1123871 | 1124608 | 463871 | 464608 | gene=IY08_05985 | protein=spore coat protein                                | protein_id=KGT44775.1 |
| gene | 1124617 | 1125162 | 464617 | 465162 | gene=IY08_05990 | protein=dTDP-4-dehydorrhamnose 3,5-epimerase              | protein_id=KGT44776.1 |
| gene | 1125178 | 1126149 | 465178 | 466149 | gene=IY08_05995 | protein=dTDP-glucose 4,6-dehydratase                      | protein_id=KGT44777.1 |
| gene | 1126162 | 1127016 | 466162 | 467016 | gene=IY08_06000 | protein=spore coat protein                                | protein_id=KGT44778.1 |
| gene | 1127125 | 1127895 | 467125 | 467895 | gene=IY08_06005 | protein=enoyl-ACP reductase                               | protein_id=KGT44779.1 |
| gene | 1128058 | 1128579 | 468058 | 468579 | gene=IY08_06010 | protein=Signal recognition particle receptor protein FtsY | protein_id=KGT44780.1 |
| gene | 1128628 | 1129092 | 468628 | 469092 | gene=IY08_06015 | protein=spore coat protein                                | protein_id=KGT44781.1 |
| gene | 1129218 | 1129577 | 469218 | 469577 | gene=IY08_06020 | protein=membrane protein                                  | protein_id=KGT44782.1 |
| gene | 1129679 | 1129864 | 469679 | 469864 | gene=IY08_06025 | protein=cytochrome C oxidase subunit III                  | protein_id=KGT44783.1 |
| gene | 1129940 | 1130443 | 469940 | 470443 | gene=IY08_06030 | protein=membrane protein                                  | protein_id=KGT44784.1 |
| gene | 1130611 | 1131078 | 470611 | 471078 | gene=IY08_06035 | protein=spore coat protein                                | protein_id=KGT44785.1 |
| gene | 1131222 | 1133288 | 471222 | 473288 | gene=IY08_06040 | protein=ATP-dependent DNA helicase                        | protein_id=KGT44786.1 |
| gene | 1133389 | 1133811 | 473389 | 473811 | gene=IY08_06045 | protein=acetyltransferase                                 | protein_id=KGT44787.1 |
| gene | 1133813 | 1134331 | 473813 | 474331 | gene=IY08_06050 | protein=hypothetical protein                              | protein_id=KGT44788.1 |
| gene | 1134425 | 1135156 | 474425 | 475156 | gene=IY08_06055 | protein=hypothetical protein                              | protein_id=KGT44789.1 |
| gene | 1135360 | 1136271 | 475360 | 476271 | gene=IY08_06060 | protein=multidrug transporter                             | protein_id=KGT44790.1 |

|      |         |         |        |        |                 |                                                     |                       |
|------|---------|---------|--------|--------|-----------------|-----------------------------------------------------|-----------------------|
| gene | 1136348 | 1136674 | 476348 | 476674 | gene=IY08_06065 | protein=cyclic nucleotide-binding protein           | protein_id=KGT44791.1 |
| gene | 1136699 | 1137097 | 476699 | 477097 | gene=IY08_06070 | protein=hypothetical protein                        | protein_id=KGT44792.1 |
| gene | 1137253 | 1138731 | 477253 | 478731 | gene=IY08_06075 | protein=proline:sodium symporter PutP               | protein_id=KGT44793.1 |
| gene | 1139170 | 1139358 | 479170 | 479358 | gene=IY08_06080 | protein=hypothetical protein                        | protein_id=KGT44794.1 |
| gene | 1139762 | 1141180 | 479762 | 481180 | gene=IY08_06085 | protein=anthranilate synthase subunit I             | protein_id=KGT44795.1 |
| gene | 1141177 | 1141764 | 481177 | 481764 | gene=IY08_06090 | protein=anthranilate synthase                       | protein_id=KGT44796.1 |
| gene | 1141761 | 1142786 | 481761 | 482786 | gene=IY08_06095 | protein=anthranilate phosphoribosyltransferase      | protein_id=KGT44797.1 |
| gene | 1142788 | 1143549 | 482788 | 483549 | gene=IY08_06100 | protein=indole-3-glycerol phosphate synthase        | protein_id=KGT44798.1 |
| gene | 1143546 | 1144160 | 483546 | 484160 | gene=IY08_06105 | protein=N-(5'-phosphoribosyl)anthranilate isomerase | protein_id=KGT44799.1 |
| gene | 1144157 | 1145350 | 484157 | 485350 | gene=IY08_06110 | protein=tryptophan synthase subunit beta            | protein_id=KGT44800.1 |
| gene | 1145354 | 1146130 | 485354 | 486130 | gene=IY08_06115 | protein=tryptophan synthase subunit alpha           | protein_id=KGT44801.1 |
| gene | 1146204 | 1146563 | 486204 | 486563 | gene=IY08_06120 | protein=hypothetical protein                        | protein_id=KGT44802.1 |
| gene | 1146678 | 1148177 | 486678 | 488177 | gene=IY08_06125 | protein=lactate permease                            | protein_id=KGT44803.1 |
| gene | 1148268 | 1148951 | 488268 | 488951 | gene=IY08_06130 | protein=hypothetical protein                        | protein_id=KGT44804.1 |
| gene | 1148966 | 1149799 | 488966 | 489799 | gene=IY08_06135 | protein=membrane protein                            | protein_id=KGT44805.1 |
| gene | 1149996 | 1150781 | 489996 | 490781 | gene=IY08_06140 | protein=hypothetical protein                        | protein_id=KGT44806.1 |
| gene | 1150801 | 1152036 | 490801 | 492036 | gene=IY08_06145 | protein=hypothetical protein                        | protein_id=KGT44807.1 |
| gene | 1152083 | 1152505 | 492083 | 492505 | gene=IY08_06150 | protein=hypothetical protein                        | protein_id=KGT44808.1 |
| gene | 1152705 | 1154039 | 492705 | 494039 | gene=IY08_06155 | protein=NADH dehydrogenase                          | protein_id=KGT44809.1 |
| gene | 1154199 | 1154609 | 494199 | 494609 | gene=IY08_06160 | protein=hypothetical protein                        | protein_id=KGT44810.1 |
| gene | 1154640 | 1156181 | 494640 | 496181 | gene=IY08_06165 | protein=NADH oxidase                                | protein_id=KGT44811.1 |
| gene | 1156197 | 1158146 | 496197 | 498146 | gene=IY08_06170 | protein=bacteriocin biosynthesis protein SagD       | protein_id=KGT44812.1 |
| gene | 1158143 | 1160062 | 498143 | 500062 | gene=IY08_06175 | protein=bacteriocin maturation protein              | protein_id=KGT44813.1 |
| gene | 1160186 | 1161448 | 500186 | 501448 | gene=IY08_06180 | protein=dihydrolipoamide succinyltransferase        | protein_id=KGT44814.1 |
| gene | 1161582 | 1164449 | 501582 | 504449 | gene=IY08_06185 | protein=2-oxoglutarate dehydrogenase                | protein_id=KGT44815.1 |
| gene | 1165278 | 1165460 | 505278 | 505460 | gene=IY08_06195 | protein=hypothetical protein                        | protein_id=KGT44816.1 |
| gene | 1165593 | 1165955 | 505593 | 505955 | gene=IY08_06200 | protein=hypothetical protein                        | protein_id=KGT44817.1 |
| gene | 1165972 | 1166225 | 505972 | 506225 | pseudo          |                                                     |                       |
| gene | 1166307 | 1166852 | 506307 | 506852 | gene=IY08_06215 | protein=hypothetical protein                        | protein_id=KGT44818.1 |
| gene | 1167011 | 1167607 | 507011 | 507607 | gene=IY08_06220 | protein=hypothetical protein                        | protein_id=KGT44819.1 |
| gene | 1168485 | 1169384 | 508485 | 509384 | gene=IY08_06225 | protein=sodium ABC transporter ATP-binding protein  | protein_id=KGT44820.1 |

|      |         |         |        |        |                 |                                                                         |                       |
|------|---------|---------|--------|--------|-----------------|-------------------------------------------------------------------------|-----------------------|
| gene | 1169377 | 1170618 | 509377 | 510618 | gene=IY08_06230 | protein=sodium export permease                                          | protein_id=KGT44821.1 |
| gene | 1170932 | 1171004 | 510932 | 511004 | tRNA            |                                                                         |                       |
| gene | 1171275 | 1171739 | 511275 | 511739 | gene=IY08_06240 | protein=signal peptide protein                                          | protein_id=KGT44822.1 |
| gene | 1172329 | 1172550 | 512329 | 512550 | gene=IY08_06245 | protein=hypothetical protein                                            | protein_id=KGT44823.1 |
| gene | 1172958 | 1173185 | 512958 | 513185 | gene=IY08_06250 | protein=hypothetical protein                                            | protein_id=KGT44824.1 |
| gene | 1173337 | 1174623 | 513337 | 514623 | gene=IY08_06255 | protein=D-alanyl-D-alanine carboxypeptidase                             | protein_id=KGT44825.1 |
| gene | 1174814 | 1175383 | 514814 | 515383 | gene=IY08_06260 | protein=signal peptidase                                                | protein_id=KGT44826.1 |
| gene | 1175444 | 1176031 | 515444 | 516031 | gene=IY08_06265 | protein=cell division protein FtsN                                      | protein_id=KGT44827.1 |
| gene | 1176166 | 1176972 | 516166 | 516972 | gene=IY08_06270 | protein=erpL protein                                                    | protein_id=KGT44828.1 |
| gene | 1177360 | 1177953 | 517360 | 517953 | gene=IY08_06275 | protein=cell division protein FtsN                                      | protein_id=KGT44829.1 |
| gene | 1178026 | 1178349 | 518026 | 518349 | gene=IY08_06280 | protein=transcriptional regulator                                       | protein_id=KGT44830.1 |
| gene | 1178429 | 1178563 | 518429 | 518563 | gene=IY08_06285 | protein=SinI anti-repressor domain-containing protein                   | protein_id=KGT44831.1 |
| gene | 1178906 | 1181296 | 518906 | 521296 | gene=IY08_06290 | protein=peptidase M6                                                    | protein_id=KGT44832.1 |
| gene | 1181468 | 1182835 | 521468 | 522835 | gene=IY08_06295 | protein=aldehyde dehydrogenase                                          | protein_id=KGT44833.1 |
| gene | 1183075 | 1184058 | 523075 | 524058 | gene=IY08_06300 | protein=spermidine/putrescine ABC transporter ATP-binding protein       | protein_id=KGT44834.1 |
| gene | 1184055 | 1184903 | 524055 | 524903 | gene=IY08_06305 | protein=ABC transporter permease                                        | protein_id=KGT44835.1 |
| gene | 1184910 | 1185710 | 524910 | 525710 | gene=IY08_06310 | protein=spermidine/putrescine ABC transporter permease                  | protein_id=KGT44836.1 |
| gene | 1185749 | 1186798 | 525749 | 526798 | gene=IY08_06315 | protein=spermidine/putrescine ABC transporter substrate-binding protein | protein_id=KGT44837.1 |
| gene | 1186858 | 1187505 | 526858 | 527505 | gene=IY08_06320 | protein=phosphoesterase                                                 | protein_id=KGT44838.1 |
| gene | 1187616 | 1189808 | 527616 | 529808 | gene=IY08_06325 | protein=membrane protein                                                | protein_id=KGT44839.1 |
| gene | 1189910 | 1190326 | 529910 | 530326 | gene=IY08_06330 | protein=histidinol dehydrogenase                                        | protein_id=KGT44840.1 |
| gene | 1190427 | 1191350 | 530427 | 531350 | gene=IY08_06335 | protein=pseudouridine synthase                                          | protein_id=KGT44841.1 |
| gene | 1191442 | 1192047 | 531442 | 532047 | gene=IY08_06340 | protein=membrane protein                                                | protein_id=KGT44842.1 |
| gene | 1192085 | 1192912 | 532085 | 532912 | gene=IY08_06345 | protein=serine protease                                                 | protein_id=KGT44843.1 |
| gene | 1193378 | 1194706 | 533378 | 534706 | gene=IY08_06350 | protein=glycolate oxidase                                               | protein_id=KGT44844.1 |
| gene | 1194703 | 1196115 | 534703 | 536115 | gene=IY08_06355 | protein=FAD-binding protein                                             | protein_id=KGT44845.1 |
| gene | 1196233 | 1197348 | 536233 | 537348 | gene=IY08_06360 | protein=carbohydrate diacid regulator                                   | protein_id=KGT44846.1 |
| gene | 1197485 | 1198459 | 537485 | 538459 | gene=IY08_06365 | protein=40-residue YVTN family beta-propeller                           | protein_id=KGT44847.1 |
| gene | 1198452 | 1199123 | 538452 | 539123 | gene=IY08_06370 | protein=transcriptional regulator                                       | protein_id=KGT44848.1 |

|      |         |         |        |        |                 |                                                         |                       |
|------|---------|---------|--------|--------|-----------------|---------------------------------------------------------|-----------------------|
| gene | 1199127 | 1200527 | 539127 | 540527 | gene=IY08_06375 | protein=histidine kinase                                | protein_id=KGT44849.1 |
| gene | 1200943 | 1201599 | 540943 | 541599 | gene=IY08_06380 | protein=GntR family transcriptional regulator           | protein_id=KGT44850.1 |
| gene | 1201768 | 1202487 | 541768 | 542487 | gene=IY08_06385 | protein=Fe-S oxidoreductase                             | protein_id=KGT44851.1 |
| gene | 1202504 | 1203925 | 542504 | 543925 | gene=IY08_06390 | protein=amino acid dehydrogenase                        | protein_id=KGT44852.1 |
| gene | 1203925 | 1204635 | 543925 | 544635 | gene=IY08_06395 | protein=lactate utilization protein C                   | protein_id=KGT44853.1 |
| gene | 1204748 | 1205470 | 544748 | 545470 | gene=IY08_06400 | protein=peptidase A24                                   | protein_id=KGT44854.1 |
| gene | 1205498 | 1205797 | 545498 | 545797 | gene=IY08_06405 | protein=hypothetical protein                            | protein_id=KGT44855.1 |
| gene | 1205825 | 1206676 | 545825 | 546676 | gene=IY08_06410 | protein=transporter                                     | protein_id=KGT44856.1 |
| gene | 1206879 | 1207673 | 546879 | 547673 | gene=IY08_06415 | protein=membrane protein                                | protein_id=KGT44857.1 |
| gene | 1207968 | 1209287 | 547968 | 549287 | gene=IY08_06420 | protein=potassium transporter TrkH                      | protein_id=KGT44858.1 |
| gene | 1209402 | 1209587 | 549402 | 549587 | gene=IY08_06425 | protein=spore protein                                   | protein_id=KGT44859.1 |
| gene | 1209735 | 1210178 | 549735 | 550178 | gene=IY08_06430 | protein=3-hydroxybutyryl-CoA dehydratase                | protein_id=KGT44860.1 |
| gene | 1210280 | 1210804 | 550280 | 550804 | gene=IY08_06435 | protein=DNA recombinase                                 | protein_id=KGT44861.1 |
| gene | 1210847 | 1211299 | 550847 | 551299 | gene=IY08_06440 | protein=PadR family transcriptional regulator           | protein_id=KGT44862.1 |
| gene | 1211498 | 1211980 | 551498 | 551980 | gene=IY08_06445 | protein=PhaR protein                                    | protein_id=KGT44863.1 |
| gene | 1212131 | 1212874 | 552131 | 552874 | gene=IY08_06450 | protein=3-oxoacyl-ACP synthase                          | protein_id=KGT44864.1 |
| gene | 1212958 | 1214043 | 552958 | 554043 | gene=IY08_06455 | protein=poly(R)-hydroxyalkanoic acid synthase           | protein_id=KGT44865.1 |
| gene | 1214139 | 1215332 | 554139 | 555332 | gene=IY08_06460 | protein=oxidoreductase                                  | protein_id=KGT44866.1 |
| gene | 1215356 | 1216705 | 555356 | 556705 | gene=IY08_06465 | protein=ATP synthase                                    | protein_id=KGT44867.1 |
| gene | 1216744 | 1217079 | 556744 | 557079 | gene=IY08_06470 | protein=hypothetical protein                            | protein_id=KGT44868.1 |
| gene | 1217228 | 1217380 | 557228 | 557380 | gene=IY08_06475 | protein=stage 0 sporulation regulatory protein          | protein_id=KGT44869.1 |
| gene | 1217609 | 1218685 | 557609 | 558685 | gene=IY08_06480 | protein=iron ABC transporter substrate-binding protein  | protein_id=KGT44870.1 |
| gene | 1218706 | 1219707 | 558706 | 559707 | gene=IY08_06485 | protein=phosphonate ABC transporter ATP-binding protein | protein_id=KGT44871.1 |
| gene | 1219708 | 1221465 | 559708 | 561465 | gene=IY08_06490 | protein=phosphonate ABC transporter permease            | protein_id=KGT44872.1 |
| gene | 1221487 | 1222281 | 561487 | 562281 | gene=IY08_06495 | protein=phosphonoacetaldehyde hydrolase                 | protein_id=KGT44873.1 |
| gene | 1222297 | 1223394 | 562297 | 563394 | gene=IY08_06500 | protein=2-aminoethylphosphonate--pyruvate               | protein_id=KGT44874.1 |
| gene | 1223391 | 1224575 | 563391 | 564575 | gene=IY08_06505 | protein=saccharopine dehydrogenase                      | protein_id=KGT44875.1 |
| gene | 1224616 | 1225398 | 564616 | 565398 | gene=IY08_06510 | protein=cytochrome C                                    | protein_id=KGT44876.1 |
| gene | 1225568 | 1225687 | 565568 | 565687 | gene=IY08_06515 | protein=hypothetical protein                            | protein_id=KGT44877.1 |
| gene | 1225820 | 1228120 | 565820 | 568120 | gene=IY08_06520 | protein=internalin                                      | protein_id=KGT44878.1 |
| gene | 1228450 | 1229079 | 568450 | 569079 | gene=IY08_06525 | protein=hypothetical protein                            | protein_id=KGT44879.1 |

|      |         |         |        |        |                 |                                                            |                       |
|------|---------|---------|--------|--------|-----------------|------------------------------------------------------------|-----------------------|
| gene | 1229206 | 1229829 | 569206 | 569829 | gene=IY08_06530 | protein=CBS domain-containing protein                      | protein_id=KGT44880.1 |
| gene | 1230003 | 1230773 | 570003 | 570773 | gene=IY08_06535 | protein=dihydroorotate dehydrogenase                       | protein_id=KGT44881.1 |
| gene | 1231250 | 1231531 | 571250 | 571531 | gene=IY08_06540 | protein=stage 0 sporulation protein                        | protein_id=KGT44882.1 |
| gene | 1231561 | 1233057 | 571561 | 573057 | gene=IY08_06545 | protein=histidine kinase                                   | protein_id=KGT44883.1 |
| gene | 1233253 | 1233699 | 573253 | 573699 | gene=IY08_06550 | protein=MarR family transcriptional regulator              | protein_id=KGT44884.1 |
| gene | 1233856 | 1235550 | 573856 | 575550 | gene=IY08_06555 | protein=oligoendopeptidase F                               | protein_id=KGT44885.1 |
| gene | 1235688 | 1236221 | 575688 | 576221 | gene=IY08_06560 | protein=Putrescine importer                                | protein_id=KGT44886.1 |
| gene | 1236323 | 1236439 | 576323 | 576439 | gene=IY08_06570 | protein=glutamate dehydrogenase                            | protein_id=KGT44887.1 |
| gene | 1236451 | 1237659 | 576451 | 577659 | gene=IY08_06575 | protein=sporulation kinase                                 | protein_id=KGT44888.1 |
| gene | 1238003 | 1238665 | 578003 | 578665 | gene=IY08_06580 | protein=7-cyano-7-deazaguanine synthase                    | protein_id=KGT44889.1 |
| gene | 1238665 | 1239156 | 578665 | 579156 | gene=IY08_06585 | protein=6-pyruvoyl tetrahydrobiopterin synthase            | protein_id=KGT44890.1 |
| gene | 1239149 | 1239865 | 579149 | 579865 | gene=IY08_06590 | protein=7-carboxy-7-deazaguanine synthase                  | protein_id=KGT44891.1 |
| gene | 1239884 | 1240381 | 579884 | 580381 | gene=IY08_06595 | protein=7-cyano-7-deazaguanine reductase                   | protein_id=KGT44892.1 |
| gene | 1240430 | 1240615 | 580430 | 580615 | gene=IY08_06600 | protein=hypothetical protein                               | protein_id=KGT44893.1 |
| gene | 1240698 | 1240772 | 580698 | 580772 | gene=IY08_06605 | protein=hypothetical protein                               | protein_id=KGT44894.1 |
| gene | 1240876 | 1241031 | 580876 | 581031 | gene=IY08_06610 | protein=ABC transporter permease                           | protein_id=KGT44895.1 |
| gene | 1241120 | 1241722 | 581120 | 581722 | gene=IY08_06615 | protein=phosphoglycerate mutase                            | protein_id=KGT44896.1 |
| gene | 1241758 | 1242336 | 581758 | 582336 | gene=IY08_06620 | protein=acetyltransferase                                  | protein_id=KGT44897.1 |
| gene | 1242671 | 1242865 | 582671 | 582865 | gene=IY08_06625 | protein=abortive phage infection protein                   | protein_id=KGT44898.1 |
| gene | 1242965 | 1243282 | 582965 | 583282 | gene=IY08_06630 | protein=hypothetical protein                               | protein_id=KGT44899.1 |
| gene | 1243450 | 1243695 | 583450 | 583695 | gene=IY08_06635 | protein=hypothetical protein                               | protein_id=KGT44900.1 |
| gene | 1243760 | 1244119 | 583760 | 584119 | gene=IY08_06640 | protein=ribonucleotide reductase stimulatory protein       | protein_id=KGT44901.1 |
| gene | 1244106 | 1246190 | 584106 | 586190 | gene=IY08_06645 | protein=ribonucleotide-diphosphate reductase subunit alpha | protein_id=KGT44902.1 |
| gene | 1247113 | 1247886 | 587113 | 587886 | gene=IY08_06655 | protein=nuclease                                           | protein_id=KGT44903.1 |
| gene | 1248628 | 1249008 | 588628 | 589008 | gene=IY08_06665 | protein=GntR family transcriptional regulator              | protein_id=KGT44904.1 |
| gene | 1249005 | 1249703 | 589005 | 589703 | gene=IY08_06670 | protein=ABC transporter                                    | protein_id=KGT44905.1 |
| gene | 1249700 | 1250491 | 589700 | 590491 | gene=IY08_06675 | protein=ABC transporter permease                           | protein_id=KGT44906.1 |
| gene | 1250506 | 1251408 | 590506 | 591408 | gene=IY08_06680 | protein=ABC transporter ATP-binding protein                | protein_id=KGT44907.1 |
| gene | 1251408 | 1252184 | 591408 | 592184 | gene=IY08_06685 | protein=ABC transporter permease                           | protein_id=KGT44908.1 |
| gene | 1252432 | 1253445 | 592432 | 593445 | gene=IY08_06690 | protein=AbrB family transcriptional regulator              | protein_id=KGT44909.1 |
| gene | 1253475 | 1253657 | 593475 | 593657 | gene=IY08_06695 | protein=hypothetical protein                               | protein_id=KGT44910.1 |

|      |         |         |        |        |                 |                                                    |                       |
|------|---------|---------|--------|--------|-----------------|----------------------------------------------------|-----------------------|
| gene | 1253758 | 1254210 | 593758 | 594210 | gene=IY08_06700 | protein=AsnC family transcriptional regulator      | protein_id=KGT44911.1 |
| gene | 1254337 | 1254747 | 594337 | 594747 | gene=IY08_06705 | protein=alkylhydroperoxidase                       | protein_id=KGT44912.1 |
| gene | 1254758 | 1255312 | 594758 | 595312 | gene=IY08_06710 | protein=isochorismatase                            | protein_id=KGT44913.1 |
| gene | 1255399 | 1255797 | 595399 | 595797 | gene=IY08_06715 | protein=SSEB protein                               | protein_id=KGT44914.1 |
| gene | 1255825 | 1256745 | 595825 | 596745 | gene=IY08_06720 | protein=peptidase U61 LD-carboxypeptidase A        | protein_id=KGT44915.1 |
| gene | 1256861 | 1257949 | 596861 | 597949 | gene=IY08_06725 | protein=nitronate monooxygenase                    | protein_id=KGT44916.1 |
| gene | 1257971 | 1259146 | 597971 | 599146 | gene=IY08_06730 | protein=alanine transporter                        | protein_id=KGT44917.1 |
| gene | 1259143 | 1259382 | 599143 | 599382 | gene=IY08_06735 | protein=alanine-phosphoribitol ligase              | protein_id=KGT44918.1 |
| gene | 1259451 | 1260626 | 599451 | 600626 | gene=IY08_06740 | protein=alanine transporter                        | protein_id=KGT44919.1 |
| gene | 1260623 | 1262137 | 600623 | 602137 | gene=IY08_06745 | protein=alanine-phosphoribitol ligase              | protein_id=KGT44920.1 |
| gene | 1262150 | 1262296 | 602150 | 602296 | gene=IY08_06750 | protein=cytochrome C553                            | protein_id=KGT44921.1 |
| gene | 1262634 | 1263803 | 602634 | 603803 | gene=IY08_06755 | protein=N-acyl-L-amino acid amidohydrolase         | protein_id=KGT44922.1 |
| gene | 1264028 | 1264210 | 604028 | 604210 | gene=IY08_06760 | protein=hypothetical protein                       | protein_id=KGT44923.1 |
| gene | 1264203 | 1264649 | 604203 | 604649 | gene=IY08_06765 | protein=flavodoxin                                 | protein_id=KGT44924.1 |
| gene | 1264674 | 1265447 | 604674 | 605447 | gene=IY08_06770 | protein=hypothetical protein                       | protein_id=KGT44925.1 |
| gene | 1265546 | 1265707 | 605546 | 605707 | gene=IY08_06775 | protein=branched-chain amino acid aminotransferase | protein_id=KGT44926.1 |
| gene | 1265839 | 1266357 | 605839 | 606357 | gene=IY08_06780 | protein=biotin transporter BioY                    | protein_id=KGT44927.1 |
| gene | 1266441 | 1266590 | 606441 | 606590 | gene=IY08_06785 | protein=ketol-acid reductoisomerase                | protein_id=KGT44928.1 |
| gene | 1266609 | 1266782 | 606609 | 606782 | gene=IY08_06790 | protein=2-isopropylmalate synthase                 | protein_id=KGT44929.1 |
| gene | 1266859 | 1268217 | 606859 | 608217 | gene=IY08_06795 | protein=multidrug transporter MatE                 | protein_id=KGT44930.1 |
| gene | 1268404 | 1269195 | 608404 | 609195 | gene=IY08_06800 | protein=UDP pyrophosphate phosphatase              | protein_id=KGT44931.1 |
| gene | 1269225 | 1269779 | 609225 | 609779 | gene=IY08_06805 | protein=thioredoxin                                | protein_id=KGT44932.1 |
| gene | 1269846 | 1270277 | 609846 | 610277 | gene=IY08_06810 | protein=hypothetical protein                       | protein_id=KGT44933.1 |
| gene | 1270438 | 1270857 | 610438 | 610857 | gene=IY08_06815 | protein=MarR family transcriptional regulator      | protein_id=KGT44934.1 |
| gene | 1271012 | 1271167 | 611012 | 611167 | gene=IY08_06820 | protein=imidazoleglycerol-phosphate dehydratase    | protein_id=KGT44935.1 |
| gene | 1271190 | 1272425 | 611190 | 612425 | gene=IY08_06825 | protein=sodium:dicarboxylate symporter             | protein_id=KGT44936.1 |
| gene | 1273705 | 1275048 | 613705 | 615048 | gene=IY08_06830 | protein=Ktr system potassium transporter B         | protein_id=KGT44537.1 |
| gene | 1275084 | 1275458 | 615084 | 615458 | gene=IY08_06835 | protein=imidazole glycerol phosphate synthase      | protein_id=KGT44538.1 |
| gene | 1275707 | 1276114 | 615707 | 616114 | gene=IY08_06840 | protein=spore protein                              | protein_id=KGT44539.1 |
| gene | 1276223 | 1276312 | 616223 | 616312 | gene=IY08_06845 | protein=phosphoribosyl-ATP pyrophosphatase         | protein_id=KGT44540.1 |
| gene | 1276365 | 1276481 | 616365 | 616481 | gene=IY08_06850 | protein=hypothetical protein                       | protein_id=KGT44541.1 |



|      |         |         |        |        |                 |                                                       |                          |
|------|---------|---------|--------|--------|-----------------|-------------------------------------------------------|--------------------------|
| gene | 1276665 | 1276904 | 616665 | 616904 | gene=IY08_06855 | protein=hypothetical protein                          | protein_id=KGT44542.1    |
| gene | 1276991 | 1277230 | 616991 | 617230 | gene=IY08_06860 | protein=hypothetical protein                          | protein_id=KGT44543.1    |
| gene | 1277290 | 1277460 | 617290 | 617460 | gene=IY08_06865 | protein=hypothetical protein                          | protein_id=KGT44544.1    |
| gene | 1277645 | 1278541 | 617645 | 618541 | gene=IY08_06870 | protein=branched-chain amino acid aminotransferase    | protein_id=KGT44545.1    |
| gene | 1278857 | 1280557 | 618857 | 620557 | gene=IY08_06875 | protein=acetolactate synthase catalytic subunit       | protein_id=KGT44546.1    |
| gene | 1280554 | 1281063 | 620554 | 621063 | gene=IY08_06880 | protein=acetolactate synthase                         | protein_id=KGT44547.1    |
| gene | 1281090 | 1282100 | 621090 | 622100 | gene=IY08_06885 | protein=ketol-acid reductoisomerase                   | protein_id=KGT44548.1    |
| gene | 1282102 | 1283622 | 622102 | 623622 | gene=IY08_06890 | protein=2-isopropylmalate synthase                    | protein_id=KGT44549.1    |
| gene | 1283700 | 1284764 | 623700 | 624764 | gene=IY08_06895 | protein=3-isopropylmalate dehydrogenase               | protein_id=KGT44550.1    |
| gene | 1284764 | 1286158 | 624764 | 626158 | gene=IY08_06900 | protein=isopropylmalate isomerase                     | protein_id=KGT44551.1    |
| gene | 1286136 | 1286717 | 626136 | 626717 | gene=leuD       | protein=isopropylmalate isomerase                     | protein_id=KGT44552.1    |
| gene | 1287027 | 1288289 | 627027 | 628289 | gene=IY08_06910 | protein=ATP phosphoribosyltransferase                 | protein_id=KGT44553.1    |
| gene | 1288265 | 1288900 | 628265 | 628900 | gene=IY08_06915 | protein=ATP phosphoribosyltransferase                 | protein_id=KGT44554.1    |
| gene | 1288912 | 1290201 | 628912 | 630201 | gene=IY08_06920 | protein=histidinol dehydrogenase                      | protein_id=KGT44555.1    |
| gene | 1290201 | 1290785 | 630201 | 630785 | gene=hisB       | protein=imidazoleglycerol-phosphate dehydratase       | protein_id=KGT44556.1    |
| gene | 1290786 | 1291415 | 630786 | 631415 | gene=IY08_06930 | protein=imidazole glycerol phosphate synthase subunit | protein_id=KGT44557.1    |
| gene | 1291388 | 1292107 | 631388 | 632107 | gene=IY08_06935 | protein=1-(5-phosphoribosyl)-5-                       | (5-phosphoribosylamino)m |
| gene | 1292101 | 1292859 | 632101 | 632859 | gene=IY08_06940 | protein=imidazole glycerol phosphate synthase         | protein_id=KGT44559.1    |
| gene | 1292856 | 1293161 | 632856 | 633161 | gene=IY08_06945 | protein=phosphoribosyl-AMP cyclohydrolase             | protein_id=KGT44560.1    |
| gene | 1293172 | 1293495 | 633172 | 633495 | gene=IY08_06950 | protein=phosphoribosyl-ATP pyrophosphatase            | protein_id=KGT44561.1    |
| gene | 1293508 | 1294524 | 633508 | 634524 | gene=IY08_06955 | protein=histidinol phosphatase                        | protein_id=KGT44562.1    |
| gene | 1294593 | 1294760 | 634593 | 634760 | gene=IY08_06960 | protein=hypothetical protein                          | protein_id=KGT44563.1    |
| gene | 1294905 | 1295876 | 634905 | 635876 | gene=IY08_06965 | protein=2-hydroxyacid dehydrogenase                   | protein_id=KGT44564.1    |
| gene | 1295907 | 1296608 | 635907 | 636608 | gene=IY08_06970 | protein=CDP-diacylglycerol--serine O-                 | protein_id=KGT44565.1    |
| gene | 1296797 | 1298683 | 636797 | 638683 | gene=IY08_06975 | protein=hypothetical protein                          | protein_id=KGT44566.1    |
| gene | 1298938 | 1299333 | 638938 | 639333 | gene=IY08_06980 | protein=hypothetical protein                          | protein_id=KGT44567.1    |
| gene | 1299785 | 1301101 | 639785 | 641101 | gene=IY08_06985 | protein=diaminopimelate decarboxylase                 | protein_id=KGT44568.1    |
| gene | 1301398 | 1301541 | 641398 | 641541 | gene=IY08_06990 | protein=hypothetical protein                          | protein_id=KGT44569.1    |
| gene | 1301629 | 1302333 | 641629 | 642333 | gene=IY08_06995 | protein=phosphoadenosine phosphosulfate reductase     | protein_id=KGT44570.1    |
| gene | 1302373 | 1303509 | 642373 | 643509 | gene=sat        | protein=sulfate adenylyltransferase                   | protein_id=KGT44571.1    |
| gene | 1303522 | 1304115 | 643522 | 644115 | gene=IY08_07005 | protein=adenylylsulfate kinase                        | protein_id=KGT44572.1    |

|      |         |         |        |        |                 |                                                  |                       |
|------|---------|---------|--------|--------|-----------------|--------------------------------------------------|-----------------------|
| gene | 1304127 | 1305749 | 644127 | 645749 | gene=IY08_07010 | protein=ferredoxin--nitrite reductase            | protein_id=KGT44573.1 |
| gene | 1305760 | 1305960 | 645760 | 645960 | gene=IY08_07015 | protein=hypothetical protein                     | protein_id=KGT44574.1 |
| gene | 1306045 | 1306821 | 646045 | 646821 | gene=IY08_07020 | protein=uroporphyrin-III methyltransferase       | protein_id=KGT44575.1 |
| gene | 1306823 | 1307578 | 646823 | 647578 | gene=IY08_07025 | protein=cobalamin biosynthesis protein CbiX      | protein_id=KGT44576.1 |
| gene | 1307553 | 1308167 | 647553 | 648167 | gene=IY08_07030 | protein=precorrin-2 dehydrogenase                | protein_id=KGT44577.1 |
| gene | 1308287 | 1308430 | 648287 | 648430 | gene=IY08_07035 | protein=hypothetical protein                     | protein_id=KGT44578.1 |
| gene | 1308592 | 1309947 | 648592 | 649947 | gene=IY08_07040 | protein=hypothetical protein                     | protein_id=KGT44579.1 |
| gene | 1310241 | 1311515 | 650241 | 651515 | gene=IY08_07050 | protein=peptidase M24                            | protein_id=KGT44580.1 |
| gene | 1312011 | 1313285 | 652011 | 653285 | gene=IY08_07055 | protein=glutamate:protein symporter              | protein_id=KGT44581.1 |
| gene | 1313354 | 1313872 | 653354 | 653872 | gene=IY08_07060 | protein=hypothetical protein                     | protein_id=KGT44582.1 |
| gene | 1314193 | 1315509 | 654193 | 655509 | gene=IY08_07065 | protein=sodium:proton antiporter                 | protein_id=KGT44583.1 |
| gene | 1315691 | 1316047 | 655691 | 656047 | gene=IY08_07070 | protein=flagellar basal body rod protein         | protein_id=KGT44584.1 |
| gene | 1316095 | 1316757 | 656095 | 656757 | gene=IY08_07075 | protein=phage-shock protein                      | protein_id=KGT44585.1 |
| gene | 1316864 | 1317604 | 656864 | 657604 | gene=IY08_07080 | protein=transporter                              | protein_id=KGT44586.1 |
| gene | 1317604 | 1318659 | 657604 | 658659 | gene=IY08_07085 | protein=histidine kinase                         | protein_id=KGT44587.1 |
| gene | 1318656 | 1319288 | 658656 | 659288 | gene=IY08_07090 | protein=LuxR family transcriptional regulator    | protein_id=KGT44588.1 |
| gene | 1319537 | 1319800 | 659537 | 659800 | gene=IY08_07095 | protein=hypothetical protein                     | protein_id=KGT44589.1 |
| gene | 1319825 | 1321180 | 659825 | 661180 | gene=IY08_07100 | protein=branched-chain amino acid transporter    | protein_id=KGT44590.1 |
| gene | 1321766 | 1321975 | 661766 | 661975 | gene=IY08_07105 | protein=hypothetical protein                     | protein_id=KGT44591.1 |
| gene | 1322016 | 1322792 | 662016 | 662792 | gene=IY08_07110 | protein=SAM-dependent methyltransferase          | protein_id=KGT44592.1 |
| gene | 1322901 | 1323755 | 662901 | 663755 | gene=IY08_07115 | protein=ribosomal protein L5 domain protein      | protein_id=KGT44593.1 |
| gene | 1323863 | 1324060 | 663863 | 664060 | gene=IY08_07120 | protein=hypothetical protein                     | protein_id=KGT44594.1 |
| gene | 1324211 | 1325308 | 664211 | 665308 | gene=IY08_07125 | protein=membrane protein                         | protein_id=KGT44595.1 |
| gene | 1325423 | 1325941 | 665423 | 665941 | gene=IY08_07130 | protein=hypothetical protein                     | protein_id=KGT44596.1 |
| gene | 1326101 | 1327309 | 666101 | 667309 | gene=IY08_07135 | protein=dihydropteridine reductase               | protein_id=KGT44597.1 |
| gene | 1327327 | 1327839 | 667327 | 667839 | gene=IY08_07140 | protein=Crp/Fnr family transcriptional regulator | protein_id=KGT44598.1 |
| gene | 1328010 | 1328237 | 668010 | 668237 | gene=IY08_07145 | protein=hypothetical protein                     | protein_id=KGT44599.1 |
| gene | 1328223 | 1328354 | 668223 | 668354 | gene=IY08_07150 | protein=hypothetical protein                     | protein_id=KGT44600.1 |
| gene | 1328531 | 1329331 | 668531 | 669331 | gene=IY08_07155 | protein=membrane protein                         | protein_id=KGT44601.1 |
| gene | 1329449 | 1330447 | 669449 | 670447 | gene=IY08_07160 | protein=inorganic phosphate transporter          | protein_id=KGT44602.1 |
| gene | 1330459 | 1331079 | 670459 | 671079 | gene=IY08_07165 | protein=hypothetical protein                     | protein_id=KGT44603.1 |

|      |         |         |        |        |                 |                                                      |                       |
|------|---------|---------|--------|--------|-----------------|------------------------------------------------------|-----------------------|
| gene | 1331391 | 1333433 | 671391 | 673433 | gene=IY08_07170 | protein=peptidase                                    | protein_id=KGT44604.1 |
| gene | 1333529 | 1333957 | 673529 | 673957 | gene=IY08_07175 | protein=hypothetical protein                         | protein_id=KGT44605.1 |
| gene | 1334174 | 1334443 | 674174 | 674443 | gene=IY08_07180 | protein=flagellar hook-length control protein FliK   | protein_id=KGT44606.1 |
| gene | 1334666 | 1335937 | 674666 | 675937 | gene=IY08_07185 | protein=sporulation kinase                           | protein_id=KGT44607.1 |
| gene | 1336076 | 1336921 | 676076 | 676921 | gene=IY08_07190 | protein=hypothetical protein                         | protein_id=KGT44608.1 |
| gene | 1337137 | 1337331 | 677137 | 677331 | gene=IY08_07200 | protein=hypothetical protein                         | protein_id=KGT44609.1 |
| gene | 1337453 | 1337983 | 677453 | 677983 | gene=IY08_07205 | protein=integrase                                    | protein_id=KGT44610.1 |
| gene | 1338091 | 1339905 | 678091 | 679905 | gene=IY08_07210 | protein=histidine kinase                             | protein_id=KGT44611.1 |
| gene | 1340214 | 1340921 | 680214 | 680921 | gene=IY08_07215 | protein=purine nucleoside phosphorylase DeoD-type    | protein_id=KGT44612.1 |
| gene | 1341099 | 1341887 | 681099 | 681887 | gene=IY08_07220 | protein=hypothetical protein                         | protein_id=KGT44613.1 |
| gene | 1341892 | 1344471 | 681892 | 684471 | gene=IY08_07225 | protein=lysylcardiolipin synthase / lysyltransferase | protein_id=KGT44614.1 |
| gene | 1344653 | 1345042 | 684653 | 685042 | gene=IY08_07230 | protein=hypothetical protein                         | protein_id=KGT44615.1 |
| gene | 1345064 | 1345555 | 685064 | 685555 | gene=IY08_07235 | protein=hypothetical protein                         | protein_id=KGT44616.1 |
| gene | 1345661 | 1346575 | 685661 | 686575 | gene=IY08_07240 | protein=superoxide dismutase                         | protein_id=KGT44617.1 |
| gene | 1346688 | 1347812 | 686688 | 687812 | gene=IY08_07245 | protein=D-alanyl-D-alanine carboxypeptidase          | protein_id=KGT44618.1 |
| gene | 1347805 | 1348401 | 687805 | 688401 | gene=IY08_07250 | protein=spore maturation protein                     | protein_id=KGT44619.1 |
| gene | 1348398 | 1348928 | 688398 | 688928 | gene=IY08_07255 | protein=spore maturation protein                     | protein_id=KGT44620.1 |
| gene | 1349218 | 1349946 | 689218 | 689946 | gene=IY08_07260 | protein=pseudouridine synthase                       | protein_id=KGT44621.1 |
| gene | 1350053 | 1350574 | 690053 | 690574 | gene=IY08_07265 | protein=thiol-disulfide oxidoreductase               | protein_id=KGT44622.1 |
| gene | 1350696 | 1352321 | 690696 | 692321 | gene=IY08_07270 | protein=cytochrome C biogenesis protein              | protein_id=KGT44623.1 |
| gene | 1352336 | 1353493 | 692336 | 693493 | gene=IY08_07275 | protein=cytochrome C biogenesis protein              | protein_id=KGT44624.1 |
| gene | 1353797 | 1354513 | 693797 | 694513 | gene=IY08_07280 | protein=transcriptional regulator                    | protein_id=KGT44625.1 |
| gene | 1354546 | 1356288 | 694546 | 696288 | gene=IY08_07285 | protein=histidine kinase                             | protein_id=KGT44626.1 |
| gene | 1356425 | 1357006 | 696425 | 697006 | gene=IY08_07290 | protein=ATP:cob(I)alamin adenosyltransferase         | protein_id=KGT44627.1 |
| gene | 1357092 | 1357706 | 697092 | 697706 | gene=IY08_07295 | protein=peptidase M23                                | protein_id=KGT44628.1 |
| gene | 1357871 | 1358557 | 697871 | 698557 | gene=IY08_07300 | protein=hypothetical protein                         | protein_id=KGT44629.1 |
| gene | 1359108 | 1359686 | 699108 | 699686 | gene=IY08_07305 | protein=riboflavin transporter FmnP                  | protein_id=KGT44630.1 |
| gene | 1359808 | 1360056 | 699808 | 700056 | gene=IY08_07310 | protein=ferredoxin                                   | protein_id=KGT44631.1 |
| gene | 1360355 | 1361416 | 700355 | 701416 | gene=IY08_07315 | protein=ATP-dependent DNA helicase RecQ              | protein_id=KGT44632.1 |
| gene | 1361406 | 1362935 | 701406 | 702935 | gene=IY08_07320 | protein=ATP-dependent DNA helicase RecQ              | protein_id=KGT44633.1 |
| gene | 1362935 | 1363498 | 702935 | 703498 | gene=IY08_07325 | protein=CAAX protease                                | protein_id=KGT44634.1 |

|      |         |         |        |        |                 |                                                        |                       |
|------|---------|---------|--------|--------|-----------------|--------------------------------------------------------|-----------------------|
| gene | 1363521 | 1364000 | 703521 | 704000 | gene=IY08_07330 | protein=peptidase M23B                                 | protein_id=KGT44635.1 |
| gene | 1364068 | 1364844 | 704068 | 704844 | gene=IY08_07335 | protein=metallophosphoesterase                         | protein_id=KGT44636.1 |
| gene | 1364844 | 1365719 | 704844 | 705719 | gene=IY08_07340 | protein=MerR family transcriptional regulator          | protein_id=KGT44637.1 |
| gene | 1365797 | 1366405 | 705797 | 706405 | gene=IY08_07345 | protein=adaptor protein                                | protein_id=KGT44638.1 |
| gene | 1366717 | 1368003 | 706717 | 708003 | gene=IY08_07350 | protein=glutamate dehydrogenase                        | protein_id=KGT44639.1 |
| gene | 1368084 | 1368293 | 708084 | 708293 | gene=IY08_07355 | protein=hypothetical protein                           | protein_id=KGT44640.1 |
| gene | 1368387 | 1368623 | 708387 | 708623 | gene=IY08_07360 | protein=hypothetical protein                           | protein_id=KGT44641.1 |
| gene | 1368703 | 1369233 | 708703 | 709233 | gene=IY08_07365 | protein=N-acetylmuramoyl-L-alanine amidase             | protein_id=KGT44642.1 |
| gene | 1369342 | 1370322 | 709342 | 710322 | gene=IY08_07370 | protein=hypothetical protein                           | protein_id=KGT44643.1 |
| gene | 1370358 | 1371290 | 710358 | 711290 | gene=IY08_07375 | protein=asparaginase                                   | protein_id=KGT44644.1 |
| gene | 1371513 | 1371686 | 711513 | 711686 | gene=IY08_07380 | protein=hypothetical protein                           | protein_id=KGT44645.1 |
| gene | 1371816 | 1372493 | 711816 | 712493 | gene=IY08_07385 | protein=cytidylate kinase                              | protein_id=KGT44646.1 |
| gene | 1372828 | 1373976 | 712828 | 713976 | gene=IY08_07390 | protein=30S ribosomal protein S1                       | protein_id=KGT44647.1 |
| gene | 1373989 | 1375038 | 713989 | 715038 | gene=IY08_07395 | protein=isopentenyl pyrophosphate isomerase            | protein_id=KGT44648.1 |
| gene | 1375345 | 1375479 | 715345 | 715479 | gene=IY08_07400 | protein=hypothetical protein                           | protein_id=KGT44649.1 |
| gene | 1375597 | 1376208 | 715597 | 716208 | gene=IY08_07405 | protein=membrane protein                               | protein_id=KGT44650.1 |
| gene | 1376201 | 1377094 | 716201 | 717094 | gene=IY08_07410 | protein=membrane protein                               | protein_id=KGT44651.1 |
| gene | 1377091 | 1377276 | 717091 | 717276 | gene=IY08_07415 | protein=hypothetical protein                           | protein_id=KGT44652.1 |
| gene | 1377401 | 1378711 | 717401 | 718711 | gene=engA       | protein=GTP-binding protein Der                        | protein_id=KGT44653.1 |
| gene | 1378730 | 1379752 | 718730 | 719752 | gene=IY08_07425 | protein=glycerol-3-phosphate dehydrogenase             | protein_id=KGT44654.1 |
| gene | 1379869 | 1380120 | 719869 | 720120 | gene=IY08_07430 | protein=ATP synthase                                   | protein_id=KGT44655.1 |
| gene | 1380388 | 1380591 | 720388 | 720591 | gene=IY08_07435 | protein=hypothetical protein                           | protein_id=KGT44656.1 |
| gene | 1380655 | 1381365 | 720655 | 721365 | gene=IY08_07440 | protein=hypothetical protein                           | protein_id=KGT44657.1 |
| gene | 1381611 | 1383089 | 721611 | 723089 | gene=IY08_07445 | protein=stage IV sporulation protein A                 | protein_id=KGT44658.1 |
| gene | 1383388 | 1383660 | 723388 | 723660 | gene=IY08_07450 | protein=DNA-binding protein                            | protein_id=KGT44659.1 |
| gene | 1384533 | 1385267 | 724533 | 725267 | gene=IY08_07460 | protein=heptaprenyl diphosphate synthase               | protein_id=KGT44660.1 |
| gene | 1385306 | 1386019 | 725306 | 726019 | gene=IY08_07465 | protein=ubiquinone biosynthesis methyltransferase UbiE | protein_id=KGT44661.1 |
| gene | 1386051 | 1387013 | 726051 | 727013 | gene=IY08_07470 | protein=heptaprenyl diphosphate synthase               | protein_id=KGT44662.1 |
| gene | 1387138 | 1387584 | 727138 | 727584 | gene=IY08_07475 | protein=nucleoside diphosphate kinase                  | protein_id=KGT44663.1 |
| gene | 1387849 | 1389021 | 727849 | 729021 | gene=IY08_07480 | protein=chorismate synthase                            | protein_id=KGT44664.1 |
| gene | 1389021 | 1390106 | 729021 | 730106 | gene=IY08_07485 | protein=3-dehydroquinate synthase                      | protein_id=KGT44665.1 |

|      |         |         |        |        |                 |                                                         |                       |
|------|---------|---------|--------|--------|-----------------|---------------------------------------------------------|-----------------------|
| gene | 1390239 | 1391351 | 730239 | 731351 | gene=IY08_07490 | protein=histidinol-phosphate aminotransferase           | protein_id=KGT44666.1 |
| gene | 1391680 | 1392942 | 731680 | 732942 | gene=IY08_07495 | protein=TPR repeat-containing protein                   | protein_id=KGT44667.1 |
| gene | 1393016 | 1393552 | 733016 | 733552 | gene=IY08_07500 | protein=hypothetical protein                            | protein_id=KGT44668.1 |
| gene | 1393707 | 1394168 | 733707 | 734168 | gene=IY08_07505 | protein=hypothetical protein                            | protein_id=KGT44669.1 |
| gene | 1394306 | 1394818 | 734306 | 734818 | gene=IY08_07510 | protein=menaquinol-cytochrome C reductase               | protein_id=KGT44670.1 |
| gene | 1394819 | 1395493 | 734819 | 735493 | gene=IY08_07515 | protein=cytochrome b6                                   | protein_id=KGT44671.1 |
| gene | 1395537 | 1396304 | 735537 | 736304 | gene=IY08_07520 | protein=cytochrome Cbb3                                 | protein_id=KGT44672.1 |
| gene | 1396441 | 1397013 | 736441 | 737013 | gene=IY08_07525 | protein=membrane protein                                | protein_id=KGT44673.1 |
| gene | 1397039 | 1397725 | 737039 | 737725 | gene=IY08_07530 | protein=membrane protein                                | protein_id=KGT44674.1 |
| gene | 1397833 | 1398621 | 737833 | 738621 | gene=IY08_07535 | protein=sporulation protein                             | protein_id=KGT44675.1 |
| gene | 1398726 | 1399406 | 738726 | 739406 | gene=IY08_07540 | protein=flagellar biosynthesis anti-sigma factor FlgM   | protein_id=KGT44676.1 |
| gene | 1399509 | 1400150 | 739509 | 740150 | gene=IY08_07545 | protein=uracil-DNA glycosylase                          | protein_id=KGT44677.1 |
| gene | 1400179 | 1401060 | 740179 | 741060 | gene=IY08_07550 | protein=membrane protein                                | protein_id=KGT44678.1 |
| gene | 1401268 | 1401462 | 741268 | 741462 | gene=IY08_07555 | protein=hypothetical protein                            | protein_id=KGT44679.1 |
| gene | 1401511 | 1401882 | 741511 | 741882 | gene=IY08_07560 | protein=nucleotide pyrophosphohydrolase                 | protein_id=KGT44680.1 |
| gene | 1401882 | 1402682 | 741882 | 742682 | gene=IY08_07565 | protein=dihydrodipicolinate reductase                   | protein_id=KGT44681.1 |
| gene | 1402697 | 1403092 | 742697 | 743092 | gene=IY08_07570 | protein=methylglyoxal synthase                          | protein_id=KGT44682.1 |
| gene | 1403104 | 1403808 | 743104 | 743808 | gene=IY08_07575 | protein=deacetylase                                     | protein_id=KGT44683.1 |
| gene | 1403805 | 1404950 | 743805 | 744950 | gene=IY08_07580 | protein=N-acetyl-alpha-D-glucosaminyl L-malate synthase | protein_id=KGT44684.1 |
| gene | 1404937 | 1406130 | 744937 | 746130 | gene=IY08_07585 | protein=tRNA CCA-pyrophosphorylase                      | protein_id=KGT44685.1 |
| gene | 1406115 | 1407095 | 746115 | 747095 | gene=IY08_07590 | protein=biotin--acetyl-CoA-carboxylase ligase           | protein_id=KGT44686.1 |
| gene | 1407223 | 1407612 | 747223 | 747612 | gene=IY08_07595 | protein=cytochrome B561                                 | protein_id=KGT44687.1 |
| gene | 1408096 | 1408932 | 748096 | 748932 | gene=IY08_07605 | protein=3-methyl-2-oxobutanoate                         | protein_id=KGT44688.1 |
| gene | 1408932 | 1409780 | 748932 | 749780 | gene=IY08_07610 | protein=pantoate--beta-alanine ligase                   | protein_id=KGT44689.1 |
| gene | 1409793 | 1410176 | 749793 | 750176 | gene=IY08_07615 | protein=aspartate decarboxylase                         | protein_id=KGT44690.1 |
| gene | 1410308 | 1413112 | 750308 | 753112 | gene=IY08_07620 | protein=ATP-dependent DNA helicase                      | protein_id=KGT44691.1 |
| gene | 1413363 | 1413533 | 753363 | 753533 | gene=IY08_07625 | protein=hypothetical protein                            | protein_id=KGT44692.1 |
| gene | 1413541 | 1414044 | 753541 | 754044 | gene=IY08_07630 | protein=peptidase M4                                    | protein_id=KGT44693.1 |
| gene | 1414063 | 1415250 | 754063 | 755250 | gene=IY08_07635 | protein=aspartate aminotransferase                      | protein_id=KGT44694.1 |
| gene | 1415371 | 1416078 | 755371 | 756078 | gene=IY08_07640 | protein=DNA replication protein DnaD                    | protein_id=KGT44695.1 |
| gene | 1416094 | 1416741 | 756094 | 756741 | gene=IY08_07645 | protein=endonuclease III                                | protein_id=KGT44696.1 |

|      |         |         |        |        |                 |                                              |                       |
|------|---------|---------|--------|--------|-----------------|----------------------------------------------|-----------------------|
| gene | 1416745 | 1417248 | 756745 | 757248 | gene=IY08_07650 | protein=GTPase                               | protein_id=KGT44697.1 |
| gene | 1417290 | 1419989 | 757290 | 759989 | gene=IY08_07655 | protein=penicillin-binding protein           | protein_id=KGT44698.1 |
| gene | 1420056 | 1420658 | 760056 | 760658 | gene=IY08_07660 | protein=Holliday junction resolvase          | protein_id=KGT44699.1 |
| gene | 1420762 | 1421787 | 760762 | 761787 | gene=IY08_07665 | protein=hypothetical protein                 | protein_id=KGT44700.1 |
| gene | 1422204 | 1422446 | 762204 | 762446 | gene=IY08_07675 | protein=hypothetical protein                 | protein_id=KGT44701.1 |
| gene | 1422462 | 1422806 | 762462 | 762806 | gene=IY08_07680 | protein=hypothetical protein                 | protein_id=KGT44702.1 |
| gene | 1422833 | 1423024 | 762833 | 763024 | gene=IY08_07685 | protein=hypothetical protein                 | protein_id=KGT44703.1 |
| gene | 1423202 | 1423738 | 763202 | 763738 | gene=IY08_07690 | protein=spore coat protein                   | protein_id=KGT44704.1 |
| gene | 1423893 | 1424321 | 763893 | 764321 | gene=IY08_07695 | protein=spore coat protein                   | protein_id=KGT44705.1 |
| gene | 1424378 | 1424932 | 764378 | 764932 | gene=IY08_07700 | protein=hypothetical protein                 | protein_id=KGT44706.1 |
| gene | 1425031 | 1425366 | 765031 | 765366 | gene=IY08_07705 | protein=cell division protein GpsB           | protein_id=KGT44707.1 |
| gene | 1425449 | 1425854 | 765449 | 765854 | ncRNA           |                                              |                       |
| gene | 1426024 | 1427163 | 766024 | 767163 | gene=IY08_07710 | protein=RNA methyltransferase                | protein_id=KGT44708.1 |
| gene | 1427225 | 1427407 | 767225 | 767407 | gene=IY08_07715 | protein=hypothetical protein                 | protein_id=KGT44709.1 |
| gene | 1427546 | 1429483 | 767546 | 769483 | gene=IY08_07720 | protein=ATP-dependent helicase               | protein_id=KGT44710.1 |
| gene | 1429585 | 1431102 | 769585 | 771102 | gene=IY08_07725 | protein=peptidase M32                        | protein_id=KGT44711.1 |
| gene | 1431151 | 1431624 | 771151 | 771624 | gene=IY08_07730 | protein=acetyltransferase                    | protein_id=KGT44712.1 |
| gene | 1431782 | 1432528 | 771782 | 772528 | gene=IY08_07735 | protein=methionine aminopeptidase            | protein_id=KGT44713.1 |
| gene | 1432855 | 1433448 | 772855 | 773448 | gene=IY08_07740 | protein=xanthine phosphoribosyltransferase   | protein_id=KGT44714.1 |
| gene | 1433452 | 1434774 | 773452 | 774774 | gene=IY08_07745 | protein=xanthine permease                    | protein_id=KGT44715.1 |
| gene | 1434790 | 1435953 | 774790 | 775953 | gene=IY08_07750 | protein=membrane protein                     | protein_id=KGT44716.1 |
| gene | 1436502 | 1440161 | 776502 | 780161 | gene=IY08_07760 | protein=GTPase                               | protein_id=KGT44717.1 |
| gene | 1440165 | 1440419 | 780165 | 780419 | gene=IY08_07765 | protein=hypothetical protein                 | protein_id=KGT44718.1 |
| gene | 1440492 | 1440959 | 780492 | 780959 | gene=IY08_07770 | protein=acetyltransferase                    | protein_id=KGT44719.1 |
| gene | 1440980 | 1441252 | 780980 | 781252 | gene=IY08_07775 | protein=hypothetical protein                 | protein_id=KGT44720.1 |
| gene | 1441255 | 1442088 | 781255 | 782088 | gene=IY08_07780 | protein=3-mercaptopyruvate sulfurtransferase | protein_id=KGT44721.1 |
| gene | 1442647 | 1443096 | 782647 | 783096 | gene=IY08_07785 | protein=hypothetical protein                 | protein_id=KGT44722.1 |
| gene | 1443180 | 1443491 | 783180 | 783491 | gene=IY08_07790 | protein=lipoprotein                          | protein_id=KGT44723.1 |
| gene | 1443495 | 1444733 | 783495 | 784733 | gene=IY08_07795 | protein=glutathionylspermidine synthase      | protein_id=KGT44724.1 |
| gene | 1444726 | 1445112 | 784726 | 785112 | gene=IY08_07800 | protein=cell surface protein                 | protein_id=KGT44725.1 |
| gene | 1445827 | 1446552 | 785827 | 786552 | gene=IY08_07805 | protein=magnesium transporter                | protein_id=KGT44726.1 |

|      |         |         |        |        |                 |                                           |                       |
|------|---------|---------|--------|--------|-----------------|-------------------------------------------|-----------------------|
| gene | 1446685 | 1447551 | 786685 | 787551 | gene=IY08_07810 | protein=5'-3' exonuclease                 | protein_id=KGT44727.1 |
| gene | 1447907 | 1448047 | 787907 | 788047 | gene=IY08_07815 | protein=hypothetical protein              | protein_id=KGT44728.1 |
| gene | 1448376 | 1449569 | 788376 | 789569 | gene=IY08_07820 | protein=acetyltransferase                 | protein_id=KGT44729.1 |
| gene | 1449570 | 1450313 | 789570 | 790313 | gene=IY08_07825 | protein=capsule biosynthesis protein CapK | protein_id=KGT44730.1 |
| gene | 1450300 | 1450920 | 790300 | 790920 | gene=IY08_07830 | protein=tyrosine protein kinase           | protein_id=KGT44731.1 |
| gene | 1450939 | 1451577 | 790939 | 791577 | gene=IY08_07835 | protein=capsular biosynthesis protein     | protein_id=KGT44732.1 |
| gene | 1451634 | 1453070 | 791634 | 793070 | gene=IY08_07840 | protein=sugar translocase                 | protein_id=KGT44733.1 |
| gene | 1453074 | 1454288 | 793074 | 794288 | gene=IY08_07845 | protein=polysaccharide polymerase         | protein_id=KGT44734.1 |
| gene | 1454263 | 1455063 | 794263 | 795063 | gene=IY08_07850 | protein=glycosyl transferase              | protein_id=KGT44735.1 |
| gene | 1455060 | 1456112 | 795060 | 796112 | gene=IY08_07855 | protein=mannosyl transferase              | protein_id=KGT44736.1 |
| gene | 1456205 | 1457752 | 796205 | 797752 | gene=IY08_07860 | protein=hypothetical protein              | protein_id=KGT44737.1 |
| gene | 1457865 | 1472897 | 797865 | 812897 | gene=IY08_07865 | protein=cell surface protein              | protein_id=KGT44738.1 |
| gene | 1473020 | 1473880 | 813020 | 813880 | gene=IY08_07870 | protein=acetyltransferase                 | protein_id=KGT44739.1 |
| gene | 1473922 | 1474482 | 813922 | 814482 | gene=IY08_07875 | protein=isochorismatase                   | protein_id=KGT44740.1 |
| gene | 1474665 | 1474925 | 814665 | 814925 | gene=IY08_07880 | protein=hypothetical protein              | protein_id=KGT44741.1 |
| gene | 1474928 | 1475833 | 814928 | 815833 | gene=IY08_07885 | protein=membrane protein                  | protein_id=KGT44742.1 |
| gene | 1475847 | 1476233 | 815847 | 816233 | gene=rnhA       | protein=ribonuclease H                    | protein_id=KGT44743.1 |
| gene | 1476303 | 1477175 | 816303 | 817175 | gene=IY08_07895 | protein=LACX protein                      | protein_id=KGT44744.1 |
| gene | 1477358 | 1477843 | 817358 | 817843 | gene=IY08_07900 | protein=membrane protein                  | protein_id=KGT44745.1 |
| gene | 1477995 | 1478654 | 817995 | 818654 | gene=IY08_07905 | protein=hypothetical protein              | protein_id=KGT44746.1 |
| gene | 1478667 | 1478843 | 818667 | 818843 | gene=IY08_07910 | protein=hypothetical protein              | protein_id=KGT44747.1 |
| gene | 1478877 | 1479125 | 818877 | 819125 | gene=IY08_07915 | protein=hypothetical protein              | protein_id=KGT44748.1 |
| gene | 1479245 | 1479442 | 819245 | 819442 | gene=IY08_07920 | protein=cold-shock protein                | protein_id=KGT44749.1 |
| gene | 1479705 | 1480433 | 819705 | 820433 | gene=IY08_07925 | protein=YqcI/YcgG family protein          | protein_id=KGT44750.1 |
| gene | 1480559 | 1481191 | 820559 | 821191 | gene=IY08_07930 | protein=amino acid transporter            | protein_id=KGT44751.1 |
| gene | 1481211 | 1481504 | 821211 | 821504 | gene=IY08_07935 | protein=cytoplasmic protein               | protein_id=KGT44752.1 |
| gene | 1481583 | 1482212 | 821583 | 822212 | gene=IY08_07940 | protein=fatty acid hydroxylase            | protein_id=KGT44753.1 |
| gene | 1482435 | 1482776 | 822435 | 822776 | gene=IY08_07945 | protein=membrane protein                  | protein_id=KGT44754.1 |
| gene | 1482833 | 1483757 | 822833 | 823757 | gene=IY08_07950 | protein=symporter                         | partial=3'            |
| gene | 1483827 | 1484360 | 823827 | 824360 | gene=IY08_07960 | protein=symporter                         | partial=5'            |
| gene | 1484549 | 1485901 | 824549 | 825901 | gene=IY08_07965 | protein=aminotransferase                  | protein_id=KGT44496.1 |

|      |         |         |        |        |                 |                                                       |                       |
|------|---------|---------|--------|--------|-----------------|-------------------------------------------------------|-----------------------|
| gene | 1485985 | 1486263 | 825985 | 826263 | gene=IY08_07970 | protein=hypothetical protein                          | protein_id=KGT44497.1 |
| gene | 1486327 | 1487490 | 826327 | 827490 | gene=IY08_07975 | protein=sodium:proton antiporter                      | protein_id=KGT44498.1 |
| gene | 1487824 | 1489497 | 827824 | 829497 | gene=IY08_07980 | protein=ribonuclease J                                | protein_id=KGT44499.1 |
| gene | 1489591 | 1490436 | 829591 | 830436 | gene=IY08_07985 | protein=MerR family transcriptional regulator         | protein_id=KGT44500.1 |
| gene | 1490569 | 1491924 | 830569 | 831924 | gene=IY08_07990 | protein=multidrug transporter MatE                    | protein_id=KGT44501.1 |
| gene | 1491959 | 1492624 | 831959 | 832624 | gene=IY08_07995 | protein=membrane protein                              | protein_id=KGT44502.1 |
| gene | 1492786 | 1493364 | 832786 | 833364 | gene=IY08_08000 | protein=cytoplasmic protein                           | protein_id=KGT44503.1 |
| gene | 1493512 | 1493829 | 833512 | 833829 | gene=IY08_08005 | protein=membrane protein                              | protein_id=KGT44504.1 |
| gene | 1493979 | 1494713 | 833979 | 834713 | gene=IY08_08010 | protein=NADPH-dependent oxidoreductase                | protein_id=KGT44505.1 |
| gene | 1495090 | 1495815 | 835090 | 835815 | gene=IY08_08015 | protein=membrane protein                              | protein_id=KGT44506.1 |
| gene | 1496037 | 1497236 | 836037 | 837236 | gene=IY08_08020 | protein=macrolide transporter                         | protein_id=KGT44507.1 |
| gene | 1497244 | 1497711 | 837244 | 837711 | gene=IY08_08025 | protein=glyoxalase                                    | protein_id=KGT44508.1 |
| gene | 1497879 | 1497998 | 837879 | 837998 | gene=IY08_08030 | protein=hypothetical protein                          | protein_id=KGT44509.1 |
| gene | 1498231 | 1498449 | 838231 | 838449 | gene=IY08_08035 | protein=stage 0 sporulation regulatory protein        | protein_id=KGT44510.1 |
| gene | 1498503 | 1498691 | 838503 | 838691 | gene=IY08_08040 | protein=Fe-S cluster assembly protein HesB            | protein_id=KGT44511.1 |
| gene | 1498719 | 1499321 | 838719 | 839321 | gene=IY08_08045 | protein=HAD family hydrolase                          | protein_id=KGT44512.1 |
| gene | 1499494 | 1500327 | 839494 | 840327 | gene=IY08_08050 | protein=flagellar motor protein MotP                  | protein_id=KGT44513.1 |
| gene | 1500347 | 1501024 | 840347 | 841024 | gene=IY08_08055 | protein=flagellar motor protein MotS                  | protein_id=KGT44514.1 |
| gene | 1501175 | 1501543 | 841175 | 841543 | gene=IY08_08060 | protein=chemotaxis protein CheY                       | protein_id=KGT44515.1 |
| gene | 1501673 | 1503691 | 841673 | 843691 | gene=IY08_08065 | protein=chemotaxis protein CheA                       | protein_id=KGT44516.1 |
| gene | 1503861 | 1505498 | 843861 | 845498 | gene=IY08_08070 | protein=flagellar motor switch protein                | protein_id=KGT44517.1 |
| gene | 1505528 | 1506904 | 845528 | 846904 | gene=IY08_08075 | protein=transglycosylase                              | protein_id=KGT44518.1 |
| gene | 1506932 | 1507648 | 846932 | 847648 | gene=IY08_08080 | protein=hypothetical protein                          | protein_id=KGT44519.1 |
| gene | 1507680 | 1508462 | 847680 | 848462 | gene=IY08_08085 | protein=chemotaxis protein CheR                       | protein_id=KGT44520.1 |
| gene | 1508502 | 1508999 | 848502 | 848999 | gene=IY08_08090 | protein=flagellar motor switch protein FliG           | protein_id=KGT44521.1 |
| gene | 1509143 | 1509607 | 849143 | 849607 | gene=IY08_08095 | protein=UDP-N-acetylenolpyruvoylglucosamine reductase | protein_id=KGT44522.1 |
| gene | 1509623 | 1510075 | 849623 | 850075 | gene=IY08_08100 | protein=hypothetical protein                          | protein_id=KGT44523.1 |
| gene | 1510093 | 1511391 | 850093 | 851391 | gene=flgK       | protein=flagellar hook protein FlgK                   | protein_id=KGT44524.1 |
| gene | 1511433 | 1512296 | 851433 | 852296 | gene=flgL       | protein=flagellar hook protein FlgL                   | protein_id=KGT44525.1 |
| gene | 1512316 | 1513698 | 852316 | 853698 | gene=fliD       | protein=flagellar capping protein                     | protein_id=KGT44526.1 |
| gene | 1513721 | 1514089 | 853721 | 854089 | gene=IY08_08120 | protein=flagellar biosynthesis protein FliS           | protein_id=KGT44527.1 |



|      |         |         |        |        |                 |                                                       |                       |
|------|---------|---------|--------|--------|-----------------|-------------------------------------------------------|-----------------------|
| gene | 1514079 | 1514351 | 854079 | 854351 | gene=IY08_08125 | protein=flagellar basal body rod protein FlgG         | protein_id=KGT44528.1 |
| gene | 1514712 | 1515119 | 854712 | 855119 | gene=flgB       | protein=flagellar basal body rod protein FlgB         | protein_id=KGT44529.1 |
| gene | 1515141 | 1515554 | 855141 | 855554 | gene=IY08_08135 | protein=flagellar basal body rod protein FlgC         | protein_id=KGT44530.1 |
| gene | 1515571 | 1515870 | 855571 | 855870 | gene=fliE       | protein=flagellar hook-basal body protein FliE        | protein_id=KGT44531.1 |
| gene | 1515893 | 1517467 | 855893 | 857467 | gene=IY08_08145 | protein=flagellar M-ring protein FliF                 | protein_id=KGT44532.1 |
| gene | 1517481 | 1518485 | 857481 | 858485 | gene=IY08_08150 | protein=flagellar motor switch protein FliG           | protein_id=KGT44533.1 |
| gene | 1518472 | 1519161 | 858472 | 859161 | gene=fliH       | protein=flagellar assembly protein H                  | protein_id=KGT44534.1 |
| gene | 1519158 | 1520462 | 859158 | 860462 | gene=fliI       | protein=ATP synthase                                  | protein_id=KGT44535.1 |
| gene | 1520615 | 1520754 | 860615 | 860754 | gene=IY08_08165 | protein=cytoplasmic protein                           | partial=3'            |
| gene | 1520790 | 1521017 | 860790 | 861017 | gene=IY08_08170 | protein=cytoplasmic protein                           | partial=5'            |
| gene | 1521028 | 1522137 | 861028 | 862137 | gene=IY08_08175 | protein=hypothetical protein                          | protein_id=KGT44476.1 |
| gene | 1522141 | 1522719 | 862141 | 862719 | gene=flgD       | protein=flagellar basal body rod modification protein | protein_id=KGT44477.1 |
| gene | 1522736 | 1523959 | 862736 | 863959 | gene=IY08_08185 | protein=flagellar hook protein FlgE                   | protein_id=KGT44478.1 |
| gene | 1524009 | 1524344 | 864009 | 864344 | gene=IY08_08190 | protein=hypothetical protein                          | protein_id=KGT44479.1 |
| gene | 1524559 | 1525044 | 864559 | 865044 | gene=IY08_08195 | protein=LysR family transcriptional regulator         | protein_id=KGT44480.1 |
| gene | 1525168 | 1526076 | 865168 | 866076 | gene=IY08_08200 | protein=chemotaxis protein CheV                       | protein_id=KGT44481.1 |
| gene | 1526818 | 1527765 | 866818 | 867765 | gene=IY08_08205 | protein=motility gene repressor MogR                  | protein_id=KGT44482.1 |
| gene | 1527861 | 1528661 | 867861 | 868661 | gene=IY08_08210 | protein=flagellin                                     | protein_id=KGT44483.1 |
| gene | 1528913 | 1530007 | 868913 | 870007 | gene=IY08_08215 | protein=flagellin                                     | protein_id=KGT44484.1 |
| gene | 1530265 | 1531050 | 870265 | 871050 | gene=IY08_08220 | protein=lytic transglycosylase                        | protein_id=KGT44485.1 |
| gene | 1531113 | 1531337 | 871113 | 871337 | gene=IY08_08225 | protein=flagellar motor switch protein                | protein_id=KGT44486.1 |
| gene | 1531352 | 1532338 | 871352 | 872338 | gene=IY08_08230 | protein=flagellar motor switch protein FliM           | protein_id=KGT44487.1 |
| gene | 1532349 | 1532708 | 872349 | 872708 | gene=IY08_08235 | protein=flagellar motor switch protein                | protein_id=KGT44488.1 |
| gene | 1532721 | 1533041 | 872721 | 873041 | gene=IY08_08240 | protein=flagellar motor switch protein FliN           | protein_id=KGT44489.1 |
| gene | 1533038 | 1533796 | 873038 | 873796 | gene=IY08_08245 | protein=flagellar biosynthesis protein flip           | protein_id=KGT44490.1 |
| gene | 1533830 | 1534105 | 873830 | 874105 | gene=IY08_08250 | protein=flagellar biosynthesis protein FliQ           | protein_id=KGT44491.1 |
| gene | 1534121 | 1534882 | 874121 | 874882 | gene=IY08_08255 | protein=flagellar biosynthesis protein FliR           | protein_id=KGT44492.1 |
| gene | 1534893 | 1535939 | 874893 | 875939 | gene=IY08_08260 | protein=flagellar biosynthesis protein FlhB           | protein_id=KGT44493.1 |
| gene | 1536104 | 1537228 | 876104 | 877228 | gene=IY08_08265 | protein=flagellar biosynthesis protein FlhA           | partial=3'            |
| gene | 1537285 | 1538065 | 877285 | 878065 | gene=IY08_08270 | protein=flagellar biosynthesis protein FlhA           | frame=2               |
| gene | 1538080 | 1539399 | 878080 | 879399 | gene=flhF       | protein=flagellar biosynthesis regulator FlhF         | protein_id=KGT44401.1 |

|      |         |         |        |        |                 |                                                   |                       |
|------|---------|---------|--------|--------|-----------------|---------------------------------------------------|-----------------------|
| gene | 1539472 | 1540215 | 879472 | 880215 | gene=flgG       | protein=flagellar basal body rod protein FlgG     | protein_id=KGT44402.1 |
| gene | 1540333 | 1541043 | 880333 | 881043 | gene=IY08_08285 | protein=alanyl tRNA synthetase                    | protein_id=KGT44403.1 |
| gene | 1541061 | 1541897 | 881061 | 881897 | gene=IY08_08290 | protein=transcriptional regulator                 | protein_id=KGT44404.1 |
| gene | 1541890 | 1542615 | 881890 | 882615 | gene=IY08_08295 | protein=branched-chain amino acid ABC transporter | protein_id=KGT44405.1 |
| gene | 1542606 | 1542917 | 882606 | 882917 | gene=IY08_08300 | protein=branched-chain amino acid ABC transporter | protein_id=KGT44406.1 |
| gene | 1542980 | 1543150 | 882980 | 883150 | gene=IY08_08305 | protein=hypothetical protein                      | protein_id=KGT44407.1 |
| gene | 1543176 | 1543535 | 883176 | 883535 | gene=IY08_08310 | protein=hypothetical protein                      | protein_id=KGT44408.1 |
| gene | 1543651 | 1544235 | 883651 | 884235 | gene=IY08_08315 | protein=DeoR family transcriptional regulator     | protein_id=KGT44409.1 |
| gene | 1544238 | 1544573 | 884238 | 884573 | gene=IY08_08320 | protein=JEMB protein                              | protein_id=KGT44410.1 |
| gene | 1544758 | 1544937 | 884758 | 884937 | gene=IY08_08325 | protein=spore protein                             | protein_id=KGT44411.1 |
| gene | 1545004 | 1546218 | 885004 | 886218 | gene=IY08_08330 | protein=DNA-binding protein                       | protein_id=KGT44412.1 |
| gene | 1546338 | 1547606 | 886338 | 887606 | gene=IY08_08335 | protein=permease                                  | protein_id=KGT44413.1 |
| gene | 1547725 | 1548249 | 887725 | 888249 | gene=IY08_08340 | protein=lipoprotein                               | protein_id=KGT44414.1 |
| gene | 1548290 | 1549183 | 888290 | 889183 | gene=IY08_08345 | protein=LysR family transcriptional regulator     | protein_id=KGT44415.1 |
| gene | 1549346 | 1550338 | 889346 | 890338 | gene=IY08_08350 | protein=ABC transporter ATP-binding protein       | protein_id=KGT44416.1 |
| gene | 1550316 | 1551341 | 890316 | 891341 | gene=IY08_08355 | protein=ABC transporter substrate-binding protein | protein_id=KGT44417.1 |
| gene | 1551354 | 1553024 | 891354 | 893024 | gene=IY08_08360 | protein=ABC transporter permease                  | protein_id=KGT44418.1 |
| gene | 1553021 | 1554283 | 893021 | 894283 | gene=IY08_08365 | protein=metallo-beta-lactamase                    | protein_id=KGT44419.1 |
| gene | 1554304 | 1555137 | 894304 | 895137 | gene=IY08_08370 | protein=hypothetical protein                      | protein_id=KGT44420.1 |
| gene | 1555192 | 1555614 | 895192 | 895614 | gene=IY08_08375 | protein=hypothetical protein                      | protein_id=KGT44421.1 |
| gene | 1555838 | 1555999 | 895838 | 895999 | gene=IY08_08380 | protein=peptidase                                 | protein_id=KGT44422.1 |
| gene | 1556177 | 1557268 | 896177 | 897268 | gene=IY08_08385 | protein=D-alanyl-D-alanine carboxypeptidase       | protein_id=KGT44423.1 |
| gene | 1557385 | 1557960 | 897385 | 897960 | gene=IY08_08390 | protein=phosphoglycerate mutase                   | protein_id=KGT44424.1 |
| gene | 1558050 | 1558421 | 898050 | 898421 | gene=IY08_08395 | protein=hypothetical protein                      | protein_id=KGT44425.1 |
| gene | 1558461 | 1559372 | 898461 | 899372 | gene=IY08_08400 | protein=alpha/beta hydrolase                      | protein_id=KGT44426.1 |
| gene | 1559333 | 1559662 | 899333 | 899662 | gene=IY08_08405 | protein=sodium:proton antiporter                  | protein_id=KGT44427.1 |
| gene | 1559646 | 1560056 | 899646 | 900056 | gene=IY08_08410 | protein=MarR family transcriptional regulator     | protein_id=KGT44428.1 |
| gene | 1560179 | 1561006 | 900179 | 901006 | gene=IY08_08415 | protein=hypothetical protein                      | protein_id=KGT44429.1 |
| gene | 1561049 | 1562872 | 901049 | 902872 | gene=IY08_08420 | protein=asparagine synthase                       | protein_id=KGT44430.1 |
| gene | 1563134 | 1563700 | 903134 | 903700 | gene=IY08_08425 | protein=RNA polymerase factor sigma-70            | protein_id=KGT44431.1 |
| gene | 1563697 | 1564803 | 903697 | 904803 | gene=IY08_08430 | protein=ECF-type sigma factor negative effector   | protein_id=KGT44432.1 |

|      |         |         |        |        |                 |                                               |                       |
|------|---------|---------|--------|--------|-----------------|-----------------------------------------------|-----------------------|
| gene | 1564843 | 1565916 | 904843 | 905916 | gene=IY08_08435 | protein=glycosyl hydrolase                    | protein_id=KGT44433.1 |
| gene | 1566128 | 1567027 | 906128 | 907027 | gene=IY08_08440 | protein=cation transporter                    | protein_id=KGT44434.1 |
| gene | 1567221 | 1567391 | 907221 | 907391 | gene=IY08_08445 | protein=histidine kinase                      | protein_id=KGT44435.1 |
| gene | 1567448 | 1568119 | 907448 | 908119 | gene=IY08_08450 | protein=GntR family transcriptional regulator | protein_id=KGT44436.1 |
| gene | 1568136 | 1569101 | 908136 | 909101 | gene=IY08_08455 | protein=transporter                           | protein_id=KGT44437.1 |
| gene | 1569237 | 1569548 | 909237 | 909548 | gene=IY08_08460 | protein=multidrug ABC transporter permease    | protein_id=KGT44438.1 |
| gene | 1569584 | 1570771 | 909584 | 910771 | gene=IY08_08465 | protein=cobalamin biosynthesis protein CobW   | protein_id=KGT44439.1 |
| gene | 1570955 | 1571932 | 910955 | 911932 | gene=IY08_08470 | protein=membrane protein                      | protein_id=KGT44440.1 |
| gene | 1571946 | 1572830 | 911946 | 912830 | gene=IY08_08475 | protein=hypothetical protein                  | protein_id=KGT44441.1 |
| gene | 1572943 | 1573602 | 912943 | 913602 | gene=IY08_08480 | protein=hypothetical protein                  | protein_id=KGT44442.1 |
| gene | 1574065 | 1575468 | 914065 | 915468 | gene=IY08_08485 | protein=antiporter                            | protein_id=KGT44443.1 |
| gene | 1575509 | 1575889 | 915509 | 915889 | gene=IY08_08490 | protein=MerR family transcriptional regulator | protein_id=KGT44444.1 |
| gene | 1575906 | 1576616 | 915906 | 916616 | gene=IY08_08495 | protein=short-chain dehydrogenase             | protein_id=KGT44445.1 |
| gene | 1576808 | 1578196 | 916808 | 918196 | gene=IY08_08500 | protein=fumarate hydratase                    | protein_id=KGT44446.1 |
| gene | 1578292 | 1578714 | 918292 | 918714 | gene=IY08_08505 | protein=hypothetical protein                  | protein_id=KGT44447.1 |
| gene | 1578878 | 1579039 | 918878 | 919039 | gene=IY08_08510 | protein=hypothetical protein                  | protein_id=KGT44448.1 |
| gene | 1579405 | 1580169 | 919405 | 920169 | gene=IY08_08515 | protein=transcriptional regulator             | protein_id=KGT44449.1 |
| gene | 1580267 | 1581676 | 920267 | 921676 | gene=IY08_08520 | protein=multidrug transporter MatE            | protein_id=KGT44450.1 |
| gene | 1581733 | 1582431 | 921733 | 922431 | gene=IY08_08525 | protein=peptidase                             | protein_id=KGT44451.1 |
| gene | 1582824 | 1583219 | 922824 | 923219 | gene=IY08_08530 | protein=hypothetical protein                  | protein_id=KGT44452.1 |
| gene | 1583330 | 1583746 | 923330 | 923746 | gene=IY08_08535 | protein=transcriptional regulator             | protein_id=KGT44453.1 |
| gene | 1583748 | 1584560 | 923748 | 924560 | gene=IY08_08540 | protein=cell surface protein                  | protein_id=KGT44454.1 |
| gene | 1584614 | 1585333 | 924614 | 925333 | pseudo          |                                               |                       |
| gene | 1585346 | 1585900 | 925346 | 925900 | gene=IY08_08550 | protein=thiol:disulfide interchange protein   | protein_id=KGT44455.1 |
| gene | 1585918 | 1586598 | 925918 | 926598 | gene=IY08_08555 | protein=diacylglycerol transferase            | protein_id=KGT44456.1 |
| gene | 1586839 | 1587933 | 926839 | 927933 | gene=IY08_08565 | protein=histidine kinase                      | protein_id=KGT44457.1 |
| gene | 1588077 | 1588253 | 928077 | 928253 | gene=IY08_08570 | protein=ATPase                                | protein_id=KGT44458.1 |
| gene | 1588293 | 1588838 | 928293 | 928838 | gene=IY08_08575 | protein=DNA-binding protein                   | protein_id=KGT44459.1 |
| gene | 1588989 | 1590320 | 928989 | 930320 | gene=IY08_08580 | protein=serine ammonia-lyase                  | protein_id=KGT44460.1 |
| gene | 1590475 | 1591722 | 930475 | 931722 | gene=IY08_08585 | protein=hypothetical protein                  | protein_id=KGT44461.1 |
| gene | 1591753 | 1592709 | 931753 | 932709 | gene=IY08_08590 | protein=exosporium protein E                  | protein_id=KGT44462.1 |

|            |         |         |        |        |                 |                                                        |                        |
|------------|---------|---------|--------|--------|-----------------|--------------------------------------------------------|------------------------|
| gene       | 1592706 | 1593776 | 932706 | 933776 | gene=IY08_08595 | protein=multi-TM2 domain-containing protein            | protein_id=KGT44463.1  |
| gene       | 1593769 | 1594212 | 933769 | 934212 | gene=IY08_08600 | protein=hypothetical protein                           | protein_id=KGT44464.1  |
| gene       | 1594209 | 1594547 | 934209 | 934547 | gene=IY08_08605 | protein=RNA polymerase sigma factor SigW               | protein_id=KGT44465.1  |
| gene       | 1594939 | 1595613 | 934939 | 935613 | gene=IY08_08610 | protein=LuxR family transcriptional regulator          | protein_id=KGT44466.1  |
| gene       | 1595618 | 1596718 | 935618 | 936718 | gene=IY08_08615 | protein=histidine kinase                               | protein_id=KGT44467.1  |
| gene       | 1596855 | 1597793 | 936855 | 937793 | gene=IY08_08620 | protein=antibiotic ABC transporter ATP-binding protein | protein_id=KGT44468.1  |
| gene       | 1597831 | 1598940 | 937831 | 938940 | gene=IY08_08625 | protein=ABC transporter permease                       | protein_id=KGT44469.1  |
| gene       | 1598942 | 1600087 | 938942 | 940087 | gene=IY08_08630 | protein=ABC transporter permease                       | protein_id=KGT44470.1  |
| gene       | 1600132 | 1601070 | 940132 | 941070 | gene=IY08_08635 | protein=acetyltransferase                              | protein_id=KGT44471.1  |
| gene       | 1601188 | 1602399 | 941188 | 942399 | gene=IY08_08640 | protein=cardiolipin synthetase                         | protein_id=KGT44472.1  |
| gene       | 1602453 | 1603196 | 942453 | 943196 | gene=pyrH       | protein=uridylate kinase                               | protein_id=KGT44473.1  |
| gene       | 1603573 | 1604597 | 943573 | 944597 | gene=IY08_08650 | protein=glutamate:protein symporter                    | protein_id=KGT44474.1  |
| gene       | 1604650 | 1604874 | 944650 | 944874 | gene=IY08_08655 | protein=glutamate:protein symporter                    | protein_id=KGT44398.1  |
| gene       | 1604899 | 1605048 | 944899 | 945048 | gene=IY08_08660 | protein=AnsB (L-aspartase AnsB)                        | protein_id=KGT44399.1  |
| gene       | 1605059 | 1605600 | 945059 | 945600 | gene=aspA       | protein=aspartate ammonia-lyase                        | protein_id=KGT44397.1] |
| scaffold10 |         |         |        |        |                 |                                                        |                        |
| gene       | 1605601 | 1605991 | 1      | 391    | gene=aspA       | protein=aspartate ammonia-lyase                        | protein_id=KGT44374.1] |
| gene       | 1606067 | 1607779 | 467    | 2179   | gene=IY08_08675 | protein=malate dehydrogenase                           | protein_id=KGT44375.1  |
| gene       | 1607852 | 1609141 | 2252   | 3541   | gene=IY08_08680 | protein=histidine kinase                               | protein_id=KGT44376.1  |
| gene       | 1609144 | 1610076 | 3544   | 4476   | gene=IY08_08685 | protein=transcriptional regulator                      | protein_id=KGT44377.1  |
| gene       | 1610195 | 1613389 | 4595   | 7789   | gene=IY08_08695 | protein=helicase SNF                                   | protein_id=KGT44378.1  |
| gene       | 1613488 | 1613622 | 7888   | 8022   | gene=IY08_08700 | protein=hypothetical protein                           | protein_id=KGT44379.1  |
| gene       | 1613724 | 1613897 | 8124   | 8297   | gene=IY08_08705 | protein=hypothetical protein                           | protein_id=KGT44380.1  |
| gene       | 1614146 | 1614340 | 8546   | 8740   | gene=IY08_08710 | protein=hypothetical protein                           | protein_id=KGT44381.1  |
| gene       | 1614358 | 1615341 | 8758   | 9741   | gene=IY08_08715 | protein=asparagine synthase                            | protein_id=KGT44382.1  |
| gene       | 1615400 | 1615852 | 9800   | 10252  | gene=IY08_08720 | protein=glyoxalase                                     | protein_id=KGT44383.1  |
| gene       | 1616079 | 1617308 | 10479  | 11708  | gene=IY08_08725 | protein=aspartate kinase                               | protein_id=KGT44384.1  |
| gene       | 1617431 | 1617618 | 11831  | 12018  | pseudo          |                                                        |                        |
| gene       | 1617890 | 1618798 | 12290  | 13198  | gene=IY08_08735 | protein=membrane protein                               | protein_id=KGT44385.1  |
| gene       | 1618803 | 1619414 | 13203  | 13814  | gene=IY08_08740 | protein=hypothetical protein                           | protein_id=KGT44386.1  |
| gene       | 1619420 | 1621045 | 13820  | 15445  | gene=IY08_08745 | protein=membrane protein                               | protein_id=KGT44387.1  |

|      |         |         |       |       |                 |                                                    |                       |
|------|---------|---------|-------|-------|-----------------|----------------------------------------------------|-----------------------|
| gene | 1621074 | 1621559 | 15474 | 15959 | gene=IY08_08750 | protein=DNA mismatch repair protein MutT           | protein_id=KGT44388.1 |
| gene | 1621697 | 1622959 | 16097 | 17359 | gene=IY08_08755 | protein=tetracycline resistance protein            | protein_id=KGT44389.1 |
| gene | 1622982 | 1623135 | 17382 | 17535 | pseudo          |                                                    |                       |
| gene | 1623155 | 1623619 | 17555 | 18019 | gene=IY08_08765 | protein=hypothetical protein                       | protein_id=KGT44390.1 |
| gene | 1624023 | 1624826 | 18423 | 19226 | gene=IY08_08770 | protein=UDP-galactose-lipid carrier transferase    | protein_id=KGT44391.1 |
| gene | 1624979 | 1625518 | 19379 | 19918 | gene=IY08_08775 | protein=PadR family transcriptional regulator      | protein_id=KGT44392.1 |
| gene | 1625555 | 1627303 | 19955 | 21703 | gene=IY08_08780 | protein=MFS transporter                            | protein_id=KGT44393.1 |
| gene | 1627512 | 1628786 | 21912 | 23186 | gene=IY08_08785 | protein=MFS transporter                            | protein_id=KGT44394.1 |
| gene | 1630048 | 1631307 | 24448 | 25707 | gene=IY08_08795 | protein=GTP-binding protein                        | protein_id=KGT44395.1 |
| gene | 1631519 | 1631857 | 25919 | 26257 | gene=IY08_08800 | protein=hypothetical protein                       | protein_id=KGT44396.1 |
| gene | 1631930 | 1632736 | 26330 | 27136 | gene=IY08_08805 | protein=Fosmidomycin resistance protein            | protein_id=KGT44229.1 |
| gene | 1632747 | 1633664 | 27147 | 28064 | gene=IY08_08810 | protein=cysteine synthase                          | protein_id=KGT44230.1 |
| gene | 1633743 | 1634255 | 28143 | 28655 | gene=IY08_08815 | protein=acetyltransferase                          | protein_id=KGT44231.1 |
| gene | 1634348 | 1635175 | 28748 | 29575 | gene=IY08_08820 | protein=cytoplasmic protein                        | protein_id=KGT44232.1 |
| gene | 1635199 | 1635774 | 29599 | 30174 | gene=IY08_08825 | protein=hypothetical protein                       | protein_id=KGT44233.1 |
| gene | 1636540 | 1637877 | 30940 | 32277 | gene=IY08_08830 | protein=hypothetical protein                       | protein_id=KGT44234.1 |
| gene | 1637915 | 1638619 | 32315 | 33019 | gene=IY08_08835 | protein=polysaccharide deacetylase                 | protein_id=KGT44235.1 |
| gene | 1638946 | 1639209 | 33346 | 33609 | gene=IY08_08845 | protein=hypothetical protein                       | protein_id=KGT44236.1 |
| gene | 1639370 | 1640056 | 33770 | 34456 | gene=IY08_08850 | protein=membrane protein                           | protein_id=KGT44237.1 |
| gene | 1640167 | 1640808 | 34567 | 35208 | gene=IY08_08855 | protein=ferrous iron transporter A                 | protein_id=KGT44238.1 |
| gene | 1640951 | 1641304 | 35351 | 35704 | gene=IY08_08860 | protein=hypothetical protein                       | protein_id=KGT44239.1 |
| gene | 1641527 | 1641727 | 35927 | 36127 | gene=IY08_08865 | protein=hypothetical protein                       | protein_id=KGT44240.1 |
| gene | 1641891 | 1642427 | 36291 | 36827 | gene=IY08_08875 | protein=methionine sulfoxide reductase A           | protein_id=KGT44241.1 |
| gene | 1642518 | 1643276 | 36918 | 37676 | gene=IY08_08880 | protein=short-chain dehydrogenase                  | protein_id=KGT44242.1 |
| gene | 1644211 | 1645110 | 38611 | 39510 | gene=IY08_08885 | protein=branched-chain amino acid aminotransferase | protein_id=KGT44243.1 |
| gene | 1645133 | 1646848 | 39533 | 41248 | gene=IY08_08890 | protein=acetolactate synthase catalytic subunit    | protein_id=KGT44244.1 |
| gene | 1646845 | 1647075 | 41245 | 41475 | gene=IY08_08895 | protein=acetolactate synthase 1 regulatory subunit | protein_id=KGT44245.1 |
| gene | 1647090 | 1648097 | 41490 | 42497 | gene=IY08_08900 | protein=ketol-acid reductoisomerase                | protein_id=KGT44246.1 |
| gene | 1648144 | 1649817 | 42544 | 44217 | gene=IY08_08905 | protein=dihydroxy-acid dehydratase                 | protein_id=KGT44247.1 |
| gene | 1649849 | 1651111 | 44249 | 45511 | gene=IY08_08910 | protein=threonine dehydratase                      | protein_id=KGT44248.1 |
| gene | 1651192 | 1651419 | 45592 | 45819 | gene=IY08_08915 | protein=hypothetical protein                       | protein_id=KGT44249.1 |

|      |         |         |       |       |                 |                                                           |                       |
|------|---------|---------|-------|-------|-----------------|-----------------------------------------------------------|-----------------------|
| gene | 1651472 | 1652575 | 45872 | 46975 | gene=IY08_08920 | protein=capsular biosynthesis protein                     | protein_id=KGT44250.1 |
| gene | 1652780 | 1653496 | 47180 | 47896 | gene=IY08_08925 | protein=membrane protein                                  | protein_id=KGT44251.1 |
| gene | 1653515 | 1654375 | 47915 | 48775 | gene=IY08_08930 | protein=acetyltransferase                                 | protein_id=KGT44252.1 |
| gene | 1654543 | 1655757 | 48943 | 50157 | gene=IY08_08935 | protein=MFS transporter                                   | protein_id=KGT44253.1 |
| gene | 1655811 | 1656572 | 50211 | 50972 | gene=IY08_08940 | protein=MFS transporter                                   | protein_id=KGT44254.1 |
| gene | 1656785 | 1657708 | 51185 | 52108 | gene=IY08_08945 | protein=alpha/beta hydrolase                              | protein_id=KGT44255.1 |
| gene | 1658003 | 1658647 | 52403 | 53047 | gene=IY08_08950 | protein=LytR family transcriptional regulator             | protein_id=KGT44256.1 |
| gene | 1658775 | 1660289 | 53175 | 54689 | gene=IY08_08955 | protein=acetyl-CoA hydrolase                              | protein_id=KGT44257.1 |
| gene | 1660515 | 1660958 | 54915 | 55358 | gene=IY08_08960 | protein=acetyltransferase                                 | protein_id=KGT44258.1 |
| gene | 1660986 | 1661345 | 55386 | 55745 | pseudo          |                                                           |                       |
| gene | 1661399 | 1662724 | 55799 | 57124 | gene=IY08_08970 | protein=5-methylthioadenosine deaminase                   | protein_id=KGT44259.1 |
| gene | 1662878 | 1664506 | 57278 | 58906 | gene=IY08_08975 | protein=peptide ABC transporter substrate-binding protein | protein_id=KGT44260.1 |
| gene | 1664558 | 1665088 | 58958 | 59488 | gene=IY08_08980 | protein=acetyltransferase                                 | protein_id=KGT44261.1 |
| gene | 1665285 | 1666580 | 59685 | 60980 | gene=IY08_08985 | protein=manganese transport protein MntH                  | protein_id=KGT44262.1 |
| gene | 1667059 | 1668018 | 61459 | 62418 | gene=IY08_08990 | protein=sulfurtransferase                                 | protein_id=KGT44263.1 |
| gene | 1668229 | 1669704 | 62629 | 64104 | gene=IY08_08995 | protein=hypothetical protein                              | protein_id=KGT44264.1 |
| gene | 1669880 | 1670824 | 64280 | 65224 | gene=IY08_09000 | protein=2-dehydropantoate 2-reductase                     | protein_id=KGT44265.1 |
| gene | 1670889 | 1671017 | 65289 | 65417 | gene=IY08_09005 | protein=bacitracin ABC transporter ATP-binding protein    | protein_id=KGT44266.1 |
| gene | 1671449 | 1673275 | 65849 | 67675 | gene=IY08_09010 | protein=amino acid permease                               | protein_id=KGT44267.1 |
| gene | 1673873 | 1675033 | 68273 | 69433 | gene=IY08_09015 | protein=enterotoxin                                       | protein_id=KGT44268.1 |
| gene | 1675072 | 1676280 | 69472 | 70680 | gene=IY08_09020 | protein=enterotoxin                                       | protein_id=KGT44269.1 |
| gene | 1676388 | 1677467 | 70788 | 71867 | gene=IY08_09025 | protein=enterotoxin                                       | protein_id=KGT44270.1 |
| gene | 1677701 | 1678327 | 72101 | 72727 | gene=IY08_09030 | protein=amino acid transporter LysE                       | protein_id=KGT44271.1 |
| gene | 1678452 | 1678763 | 72852 | 73163 | gene=IY08_09035 | protein=hypothetical protein                              | protein_id=KGT44272.1 |
| gene | 1678855 | 1679508 | 73255 | 73908 | gene=IY08_09040 | protein=CAAX protease                                     | protein_id=KGT44273.1 |
| gene | 1680149 | 1680739 | 74549 | 75139 | gene=IY08_09045 | protein=TetR family transcriptional regulator             | protein_id=KGT44274.1 |
| gene | 1681030 | 1682196 | 75430 | 76596 | gene=IY08_09050 | protein=hypothetical protein                              | protein_id=KGT44275.1 |
| gene | 1682574 | 1683521 | 76974 | 77921 | gene=IY08_09055 | protein=RNA polymerase sigma70                            | protein_id=KGT44276.1 |
| gene | 1683627 | 1683848 | 78027 | 78248 | gene=IY08_09060 | protein=hypothetical protein                              | protein_id=KGT44277.1 |
| gene | 1683826 | 1684497 | 78226 | 78897 | gene=IY08_09065 | protein=deoxyribose-phosphate aldolase                    | protein_id=KGT44278.1 |
| gene | 1684600 | 1685781 | 79000 | 80181 | gene=IY08_09070 | protein=pyrimidine nucleoside transporter NupC            | protein_id=KGT44279.1 |

|      |         |         |        |        |                 |                                               |                       |
|------|---------|---------|--------|--------|-----------------|-----------------------------------------------|-----------------------|
| gene | 1685818 | 1687119 | 80218  | 81519  | gene=deoA       | protein=thymidine phosphorylase               | protein_id=KGT44280.1 |
| gene | 1687153 | 1687548 | 81553  | 81948  | gene=IY08_09080 | protein=cytidine deaminase                    | protein_id=KGT44281.1 |
| gene | 1687695 | 1688090 | 82095  | 82490  | gene=IY08_09085 | protein=membrane protein                      | protein_id=KGT44282.1 |
| gene | 1688108 | 1688587 | 82508  | 82987  | gene=IY08_09090 | protein=membrane protein                      | protein_id=KGT44283.1 |
| gene | 1688635 | 1688865 | 83035  | 83265  | gene=IY08_09095 | protein=hypothetical protein                  | protein_id=KGT44284.1 |
| gene | 1689055 | 1690338 | 83455  | 84738  | gene=IY08_09100 | protein=Xaa-Pro aminopeptidase                | protein_id=KGT44285.1 |
| gene | 1690433 | 1691068 | 84833  | 85468  | gene=IY08_09105 | protein=quinolone resistance protein          | protein_id=KGT44286.1 |
| gene | 1691431 | 1693071 | 85831  | 87471  | gene=IY08_09110 | protein=copper oxidase                        | protein_id=KGT44287.1 |
| gene | 1693123 | 1693668 | 87523  | 88068  | gene=IY08_09115 | protein=membrane protein                      | protein_id=KGT44288.1 |
| gene | 1693991 | 1696135 | 88391  | 90535  | gene=IY08_09120 | protein=DNA topoisomerase III                 | protein_id=KGT44289.1 |
| gene | 1696340 | 1697587 | 90740  | 91987  | gene=IY08_09125 | protein=membrane protein                      | protein_id=KGT44290.1 |
| gene | 1697775 | 1698740 | 92175  | 93140  | gene=IY08_09130 | protein=arsenic resistance protein            | protein_id=KGT44291.1 |
| gene | 1699033 | 1699725 | 93433  | 94125  | gene=IY08_09135 | protein=FMN-dependent NADH-azoreductase       | protein_id=KGT44292.1 |
| gene | 1699964 | 1701322 | 94364  | 95722  | gene=IY08_09140 | protein=branched-chain amino acid transporter | protein_id=KGT44293.1 |
| gene | 1701406 | 1701825 | 95806  | 96225  | gene=IY08_09145 | protein=glyoxalase                            | protein_id=KGT44294.1 |
| gene | 1702154 | 1703803 | 96554  | 98203  | gene=IY08_09150 | protein=copper resistance protein             | protein_id=KGT44295.1 |
| gene | 1703838 | 1704458 | 98238  | 98858  | gene=IY08_09155 | protein=hypothetical protein                  | protein_id=KGT44296.1 |
| gene | 1704501 | 1705406 | 98901  | 99806  | gene=IY08_09160 | protein=transporter                           | protein_id=KGT44297.1 |
| gene | 1705504 | 1706373 | 99904  | 100773 | gene=IY08_09165 | protein=LysR family transcriptional regulator | protein_id=KGT44298.1 |
| gene | 1706494 | 1706925 | 100894 | 101325 | gene=IY08_09170 | protein=Rrf2 family transcriptional regulator | protein_id=KGT44299.1 |
| gene | 1706996 | 1707646 | 101396 | 102046 | gene=IY08_09175 | protein=hypothetical protein                  | protein_id=KGT44300.1 |
| gene | 1707704 | 1708306 | 102104 | 102706 | gene=IY08_09180 | protein=nitroreductase                        | protein_id=KGT44301.1 |
| gene | 1708433 | 1708564 | 102833 | 102964 | gene=IY08_09185 | protein=DNA mismatch repair protein MutT      | protein_id=KGT44302.1 |
| gene | 1708738 | 1708922 | 103138 | 103322 | pseudo          |                                               |                       |
| gene | 1709059 | 1710081 | 103459 | 104481 | gene=IY08_09195 | protein=membrane protein                      | protein_id=KGT44303.1 |
| gene | 1710240 | 1710869 | 104640 | 105269 | pseudo          |                                               |                       |
| gene | 1711963 | 1713270 | 106363 | 107670 | gene=IY08_09205 | protein=hypothetical protein                  | protein_id=KGT44304.1 |
| gene | 1713303 | 1721135 | 107703 | 115535 | gene=IY08_09210 | protein=hypothetical protein                  | protein_id=KGT44305.1 |
| gene | 1721132 | 1724509 | 115532 | 118909 | gene=IY08_09215 | protein=hypothetical protein                  | protein_id=KGT44306.1 |
| gene | 1724536 | 1728594 | 118936 | 122994 | gene=IY08_09220 | protein=hypothetical protein                  | protein_id=KGT44307.1 |
| gene | 1728690 | 1733612 | 123090 | 128012 | gene=IY08_09225 | protein=hypothetical protein                  | protein_id=KGT44308.1 |

|      |         |         |        |        |                 |                                                                             |                       |
|------|---------|---------|--------|--------|-----------------|-----------------------------------------------------------------------------|-----------------------|
| gene | 1733909 | 1734586 | 128309 | 128986 | gene=IY08_09230 | protein=hypothetical protein                                                | protein_id=KGT44309.1 |
| gene | 1735200 | 1736144 | 129600 | 130544 | gene=IY08_09245 | protein=lactate dehydrogenase                                               | protein_id=KGT44310.1 |
| gene | 1736345 | 1737781 | 130745 | 132181 | gene=IY08_09250 | protein=amine oxidase                                                       | protein_id=KGT44311.1 |
| gene | 1737888 | 1738811 | 132288 | 133211 | gene=IY08_09255 | protein=cobalamin biosynthesis protein                                      | protein_id=KGT44312.1 |
| gene | 1739075 | 1740292 | 133475 | 134692 | gene=IY08_09260 | protein=ABC transporter permease                                            | protein_id=KGT44313.1 |
| gene | 1740383 | 1741156 | 134783 | 135556 | gene=IY08_09265 | protein=branched-chain amino acid ABC transporter substrate-binding protein | protein_id=KGT44314.1 |
| gene | 1741134 | 1741835 | 135534 | 136235 | gene=IY08_09270 | protein=branched-chain amino acid ABC transporter ATP-binding protein       | protein_id=KGT44315.1 |
| gene | 1741857 | 1742717 | 136257 | 137117 | gene=IY08_09275 | protein=ABC transporter permease                                            | protein_id=KGT44316.1 |
| gene | 1742767 | 1743720 | 137167 | 138120 | gene=IY08_09280 | protein=branched-chain amino acid ABC transporter                           | protein_id=KGT44317.1 |
| gene | 1743782 | 1744570 | 138182 | 138970 | gene=IY08_09285 | protein=LysR family transcriptional regulator                               | protein_id=KGT44318.1 |
| gene | 1744691 | 1745239 | 139091 | 139639 | gene=IY08_09290 | protein=Petrobactin biosynthesis protein AsbA                               | protein_id=KGT44319.1 |
| gene | 1745282 | 1745710 | 139682 | 140110 | gene=IY08_09295 | protein=4-oxalocrotonate tautomerase                                        | protein_id=KGT44320.1 |
| gene | 1745691 | 1746014 | 140091 | 140414 | gene=IY08_09300 | protein=carboxymuconolactone decarboxylase                                  | protein_id=KGT44321.1 |
| gene | 1746168 | 1746611 | 140568 | 141011 | gene=IY08_09305 | protein=MarR family transcriptional regulator                               | protein_id=KGT44322.1 |
| gene | 1746731 | 1747786 | 141131 | 142186 | gene=IY08_09310 | protein=Luciferase                                                          | protein_id=KGT44323.1 |
| gene | 1748380 | 1749783 | 142780 | 144183 | gene=IY08_09315 | protein=cytochrome D ubiquinol oxidase subunit I                            | protein_id=KGT44324.1 |
| gene | 1749770 | 1750786 | 144170 | 145186 | gene=IY08_09320 | protein=nitrate reductase                                                   | protein_id=KGT44325.1 |
| gene | 1750786 | 1752507 | 145186 | 146907 | gene=IY08_09325 | protein=ATP-binding/permease CydC                                           | protein_id=KGT44326.1 |
| gene | 1752504 | 1754228 | 146904 | 148628 | gene=IY08_09330 | protein=ABC transporter ATP-binding protein                                 | protein_id=KGT44327.1 |
| gene | 1754362 | 1755510 | 148762 | 149910 | gene=IY08_09335 | protein=hypothetical protein                                                | protein_id=KGT44328.1 |
| gene | 1755618 | 1758179 | 150018 | 152579 | gene=IY08_09340 | protein=glycosyl transferase family 2                                       | protein_id=KGT44329.1 |
| gene | 1758199 | 1759329 | 152599 | 153729 | gene=IY08_09345 | protein=aminotransferase DegT                                               | protein_id=KGT44330.1 |
| gene | 1759322 | 1759888 | 153722 | 154288 | gene=IY08_09350 | protein=galactoside O-acetyltransferase                                     | protein_id=KGT44331.1 |
| gene | 1760073 | 1760294 | 154473 | 154694 | gene=IY08_09355 | protein=hypothetical protein                                                | protein_id=KGT44332.1 |
| gene | 1760385 | 1760831 | 154785 | 155231 | gene=IY08_09360 | protein=lipoprotein                                                         | protein_id=KGT44333.1 |
| gene | 1760867 | 1761205 | 155267 | 155605 | gene=IY08_09365 | protein=multidrug ABC transporter                                           | protein_id=KGT44334.1 |
| gene | 1761198 | 1761539 | 155598 | 155939 | gene=IY08_09370 | protein=hypothetical protein                                                | protein_id=KGT44335.1 |
| gene | 1761687 | 1762688 | 156087 | 157088 | gene=IY08_09375 | protein=peptidase S66                                                       | protein_id=KGT44336.1 |
| gene | 1762948 | 1763901 | 157348 | 158301 | gene=IY08_09380 | protein=D-alanyl-D-alanine carboxypeptidase                                 | protein_id=KGT44337.1 |



|      |         |         |        |        |                 |                                                           |                       |
|------|---------|---------|--------|--------|-----------------|-----------------------------------------------------------|-----------------------|
| gene | 1764148 | 1764750 | 158548 | 159150 | gene=IY08_09385 | protein=nitroreductase                                    | protein_id=KGT44338.1 |
| gene | 1764793 | 1764963 | 159193 | 159363 | gene=IY08_09390 | protein=DNA mismatch repair protein MutT                  | protein_id=KGT44339.1 |
| gene | 1765706 | 1766986 | 160106 | 161386 | gene=IY08_09400 | protein=peptidase P60                                     | protein_id=KGT44340.1 |
| gene | 1767086 | 1767850 | 161486 | 162250 | gene=IY08_09405 | protein=alpha/beta hydrolase                              | protein_id=KGT44341.1 |
| gene | 1768091 | 1769851 | 162491 | 164251 | gene=IY08_09410 | protein=multidrug ABC transporter permease                | protein_id=KGT44342.1 |
| gene | 1769928 | 1770614 | 164328 | 165014 | gene=IY08_09415 | protein=heme response regulator HssR                      | protein_id=KGT44343.1 |
| gene | 1770611 | 1771684 | 165011 | 166084 | gene=IY08_09420 | protein=membrane protein                                  | protein_id=KGT44344.1 |
| gene | 1771974 | 1772687 | 166374 | 167087 | gene=fabG       | protein=3-ketoacyl-ACP reductase                          | protein_id=KGT44345.1 |
| gene | 1772978 | 1773850 | 167378 | 168250 | gene=IY08_09430 | protein=aminoglycoside adenylyltransferase                | protein_id=KGT44346.1 |
| gene | 1773971 | 1774798 | 168371 | 169198 | gene=IY08_09435 | protein=polysaccharide deacetylase                        | protein_id=KGT44347.1 |
| gene | 1774869 | 1775207 | 169269 | 169607 | gene=IY08_09440 | protein=membrane protein                                  | protein_id=KGT44348.1 |
| gene | 1775254 | 1775862 | 169654 | 170262 | gene=IY08_09445 | protein=DNA mismatch repair protein MutT                  | protein_id=KGT44349.1 |
| gene | 1775944 | 1776582 | 170344 | 170982 | gene=IY08_09450 | protein=phosphohydrolase                                  | protein_id=KGT44350.1 |
| gene | 1777352 | 1778647 | 171752 | 173047 | gene=IY08_09460 | protein=homoserine dehydrogenase                          | protein_id=KGT44351.1 |
| gene | 1778640 | 1779698 | 173040 | 174098 | gene=IY08_09465 | protein=threonine synthase                                | protein_id=KGT44352.1 |
| gene | 1779695 | 1780588 | 174095 | 174988 | gene=IY08_09470 | protein=serine kinase                                     | protein_id=KGT44353.1 |
| gene | 1780720 | 1780929 | 175120 | 175329 | gene=IY08_09475 | protein=phage capsid protein                              | protein_id=KGT44354.1 |
| gene | 1781137 | 1783440 | 175537 | 177840 | gene=IY08_09480 | protein=lipoprotein                                       | protein_id=KGT44355.1 |
| gene | 1783761 | 1784762 | 178161 | 179162 | gene=IY08_09485 | protein=LytR family transcriptional regulator             | protein_id=KGT44356.1 |
| gene | 1784927 | 1786174 | 179327 | 180574 | gene=IY08_09490 | protein=lipoprotein                                       | protein_id=KGT44357.1 |
| gene | 1786187 | 1786876 | 180587 | 181276 | gene=IY08_09495 | protein=regulator                                         | protein_id=KGT44358.1 |
| gene | 1786873 | 1788231 | 181273 | 182631 | gene=IY08_09500 | protein=histidine kinase                                  | protein_id=KGT44359.1 |
| gene | 1788333 | 1789154 | 182733 | 183554 | gene=IY08_09505 | protein=peptidoglycan N-acetylglucosamine deacetylase     | protein_id=KGT44360.1 |
| gene | 1789169 | 1789825 | 183569 | 184225 | gene=IY08_09510 | protein=lipoprotein                                       | protein_id=KGT44361.1 |
| gene | 1789985 | 1790665 | 184385 | 185065 | gene=IY08_09515 | protein=methyltransferase                                 | protein_id=KGT44362.1 |
| gene | 1790761 | 1791285 | 185161 | 185685 | gene=IY08_09520 | protein=acetyltransferase                                 | protein_id=KGT44363.1 |
| gene | 1791584 | 1793392 | 185984 | 187792 | gene=IY08_09525 | protein=IucA/IucC family siderophore biosynthesis protein | protein_id=KGT44364.1 |
| gene | 1793453 | 1795291 | 187853 | 189691 | gene=IY08_09530 | protein=siderophore biosynthesis protein                  | protein_id=KGT44365.1 |
| gene | 1795278 | 1796516 | 189678 | 190916 | gene=IY08_09535 | protein=acyl-CoA synthetase                               | protein_id=KGT44366.1 |
| gene | 1796513 | 1796779 | 190913 | 191179 | gene=IY08_09540 | protein=acyl carrier protein                              | protein_id=KGT44367.1 |
| gene | 1796803 | 1797786 | 191203 | 192186 | gene=IY08_09545 | protein=Petrobactin biosynthesis protein AsbE             | protein_id=KGT44368.1 |

|      |         |         |        |        |                 |                                               |                       |
|------|---------|---------|--------|--------|-----------------|-----------------------------------------------|-----------------------|
| gene | 1797824 | 1798666 | 192224 | 193066 | gene=IY08_09550 | protein=3-dehydroshikimate dehydratase        | protein_id=KGT44369.1 |
| gene | 1798791 | 1798997 | 193191 | 193397 | gene=IY08_09555 | protein=spore protein                         | protein_id=KGT44370.1 |
| gene | 1799165 | 1800463 | 193565 | 194863 | gene=IY08_09560 | protein=MFS transporter                       | protein_id=KGT44371.1 |
| gene | 1800517 | 1801131 | 194917 | 195531 | gene=IY08_09565 | protein=LysE family L-lysine exporter         | protein_id=KGT44372.1 |
| gene | 1801250 | 1802193 | 195650 | 196593 | gene=IY08_09570 | protein=GntR family transcriptional regulator | protein_id=KGT44373.1 |
| gene | 1802204 | 1802692 | 196604 | 197092 | gene=IY08_09575 | protein=GntR family transcriptional regulator | protein_id=KGT44165.1 |
| gene | 1802705 | 1802872 | 197105 | 197272 | gene=IY08_09580 | protein=hypothetical protein                  | protein_id=KGT44166.1 |
| gene | 1802986 | 1803951 | 197386 | 198351 | gene=IY08_09585 | protein=phospholipase                         | protein_id=KGT44167.1 |
| gene | 1804038 | 1804184 | 198438 | 198584 | gene=IY08_09590 | protein=Luciferase                            | protein_id=KGT44168.1 |
| gene | 1804408 | 1805160 | 198808 | 199560 | gene=IY08_09595 | protein=cytoplasmic protein                   | protein_id=KGT44169.1 |
| gene | 1805310 | 1806470 | 199710 | 200870 | gene=IY08_09600 | protein=peptidase                             | protein_id=KGT44170.1 |
| gene | 1806576 | 1806773 | 200976 | 201173 | gene=IY08_09605 | protein=DNA mismatch repair protein MutT      | protein_id=KGT44171.1 |
| gene | 1806806 | 1807267 | 201206 | 201667 | gene=IY08_09610 | protein=NTP pyrophosphohydrolase              | protein_id=KGT44172.1 |
| gene | 1807317 | 1808135 | 201717 | 202535 | gene=IY08_09615 | protein=NAD synthetase                        | protein_id=KGT44173.1 |
| gene | 1808410 | 1810290 | 202810 | 204690 | gene=IY08_09620 | protein=ABC transporter permease              | protein_id=KGT44174.1 |
| gene | 1810406 | 1810693 | 204806 | 205093 | gene=IY08_09625 | protein=transition state regulator Abh        | protein_id=KGT44175.1 |
| gene | 1810968 | 1811915 | 205368 | 206315 | gene=IY08_09630 | protein=serine protease                       | protein_id=KGT44176.1 |
| gene | 1811957 | 1812265 | 206357 | 206665 | gene=IY08_09635 | protein=ArsR family transcriptional regulator | protein_id=KGT44177.1 |
| gene | 1812372 | 1813307 | 206772 | 207707 | gene=IY08_09640 | protein=oxidoreductase                        | protein_id=KGT44178.1 |
| gene | 1813355 | 1814530 | 207755 | 208930 | gene=IY08_09645 | protein=MFS transporter                       | protein_id=KGT44179.1 |
| gene | 1814579 | 1814785 | 208979 | 209185 | gene=IY08_09650 | protein=hypothetical protein                  | protein_id=KGT44180.1 |
| gene | 1814825 | 1815049 | 209225 | 209449 | gene=IY08_09655 | protein=hypothetical protein                  | protein_id=KGT44181.1 |
| gene | 1815134 | 1815481 | 209534 | 209881 | gene=IY08_09660 | protein=hypothetical protein                  | protein_id=KGT44182.1 |
| gene | 1815678 | 1816180 | 210078 | 210580 | pseudo          |                                               |                       |
| gene | 1816363 | 1817415 | 210763 | 211815 | gene=IY08_09670 | protein=GTPase RsgA                           | protein_id=KGT44183.1 |
| gene | 1817616 | 1819598 | 212016 | 213998 | gene=IY08_09675 | protein=chemotaxis protein                    | protein_id=KGT44184.1 |
| gene | 1819663 | 1819824 | 214063 | 214224 | gene=IY08_09680 | protein=hypothetical protein                  | protein_id=KGT44185.1 |
| gene | 1819795 | 1820100 | 214195 | 214500 | gene=IY08_09685 | protein=hypothetical protein                  | protein_id=KGT44186.1 |
| gene | 1820423 | 1820788 | 214823 | 215188 | gene=IY08_09690 | protein=hypothetical protein                  | protein_id=KGT44187.1 |
| gene | 1820823 | 1821863 | 215223 | 216263 | gene=IY08_09695 | protein=membrane protein                      | protein_id=KGT44188.1 |
| gene | 1822104 | 1822547 | 216504 | 216947 | gene=IY08_09700 | protein=general stress protein                | protein_id=KGT44189.1 |

|      |         |         |        |        |                 |                                                           |                       |
|------|---------|---------|--------|--------|-----------------|-----------------------------------------------------------|-----------------------|
| gene | 1822650 | 1823105 | 217050 | 217505 | gene=IY08_09705 | protein=hypothetical protein                              | protein_id=KGT44190.1 |
| gene | 1823320 | 1824264 | 217720 | 218664 | gene=IY08_09710 | protein=alpha/beta hydrolase                              | protein_id=KGT44191.1 |
| gene | 1824309 | 1825310 | 218709 | 219710 | gene=IY08_09715 | protein=hypothetical protein                              | protein_id=KGT44192.1 |
| gene | 1825415 | 1825606 | 219815 | 220006 | gene=IY08_09720 | protein=membrane protein                                  | protein_id=KGT44193.1 |
| gene | 1825784 | 1827247 | 220184 | 221647 | gene=IY08_09725 | protein=amine oxidase                                     | protein_id=KGT44194.1 |
| gene | 1827332 | 1827916 | 221732 | 222316 | gene=IY08_09730 | protein=acetyltransferase                                 | protein_id=KGT44195.1 |
| gene | 1827941 | 1828843 | 222341 | 223243 | gene=IY08_09735 | protein=oxidoreductase                                    | protein_id=KGT44196.1 |
| gene | 1829105 | 1830574 | 223505 | 224974 | gene=IY08_09740 | protein=transposase                                       | protein_id=KGT44197.1 |
| gene | 1830672 | 1831622 | 225072 | 226022 | gene=IY08_09745 | protein=cobalamin biosynthesis protein CobW               | protein_id=KGT44198.1 |
| gene | 1831735 | 1832205 | 226135 | 226605 | gene=IY08_09750 | protein=spermidine acetyltransferase                      | protein_id=KGT44199.1 |
| gene | 1832344 | 1833294 | 226744 | 227694 | gene=IY08_09755 | protein=adhesin                                           | protein_id=KGT44200.1 |
| gene | 1833561 | 1833710 | 227961 | 228110 | gene=IY08_09760 | protein=hypothetical protein                              | protein_id=KGT44201.1 |
| gene | 1833826 | 1834485 | 228226 | 228885 | gene=IY08_09765 | protein=oxidoreductase                                    | protein_id=KGT44202.1 |
| gene | 1834515 | 1835552 | 228915 | 229952 | gene=IY08_09770 | protein=NADPH dehydrogenase                               | protein_id=KGT44203.1 |
| gene | 1835686 | 1836138 | 230086 | 230538 | gene=IY08_09775 | protein=cysteine methyltransferase                        | protein_id=KGT44204.1 |
| gene | 1836164 | 1837150 | 230564 | 231550 | gene=IY08_09780 | protein=group-specific protein                            | protein_id=KGT44205.1 |
| gene | 1837235 | 1838896 | 231635 | 233296 | gene=IY08_09785 | protein=peptide ABC transporter substrate-binding protein | protein_id=KGT44206.1 |
| gene | 1838956 | 1839372 | 233356 | 233772 | gene=IY08_09790 | protein=fosfomycin resistance protein FosB                | protein_id=KGT44207.1 |
| gene | 1839386 | 1839931 | 233786 | 234331 | gene=IY08_09795 | protein=short-chain dehydrogenase                         | protein_id=KGT44208.1 |
| gene | 1839945 | 1840556 | 234345 | 234956 | gene=IY08_09800 | protein=phosphatase                                       | protein_id=KGT44209.1 |
| gene | 1840602 | 1841180 | 235002 | 235580 | gene=IY08_09805 | protein=Spore coat protein G                              | protein_id=KGT44210.1 |
| gene | 1841362 | 1842438 | 235762 | 236838 | gene=IY08_09810 | protein=spore coat protein                                | protein_id=KGT44211.1 |
| gene | 1842543 | 1843160 | 236943 | 237560 | gene=IY08_09815 | protein=ADP-ribose pyrophosphatase                        | protein_id=KGT44212.1 |
| gene | 1843265 | 1843867 | 237665 | 238267 | gene=IY08_09820 | protein=membrane protein                                  | protein_id=KGT44213.1 |
| gene | 1843965 | 1845344 | 238365 | 239744 | gene=IY08_09825 | protein=transporter                                       | protein_id=KGT44214.1 |
| gene | 1845677 | 1846618 | 240077 | 241018 | gene=IY08_09830 | protein=magnesium transporter                             | protein_id=KGT44215.1 |
| gene | 1846817 | 1847713 | 241217 | 242113 | gene=IY08_09835 | protein=membrane protein                                  | protein_id=KGT44216.1 |
| gene | 1847717 | 1848586 | 242117 | 242986 | gene=IY08_09840 | protein=hypothetical protein                              | protein_id=KGT44217.1 |
| gene | 1848706 | 1849212 | 243106 | 243612 | gene=IY08_09845 | protein=acyl-CoA hydrolase                                | protein_id=KGT44218.1 |
| gene | 1849586 | 1850770 | 243986 | 245170 | gene=IY08_09855 | protein=cardiolipin synthetase                            | protein_id=KGT44219.1 |
| gene | 1850802 | 1851260 | 245202 | 245660 | gene=IY08_09860 | protein=spore coat protein                                | protein_id=KGT44220.1 |

|            |         |         |        |        |                 |                                               |                       |
|------------|---------|---------|--------|--------|-----------------|-----------------------------------------------|-----------------------|
| gene       | 1851486 | 1851665 | 245886 | 246065 | gene=IY08_09865 | protein=hypothetical protein                  | protein_id=KGT44221.1 |
| gene       | 1851767 | 1852390 | 246167 | 246790 | gene=IY08_09870 | protein=hypothetical protein                  | protein_id=KGT44222.1 |
| gene       | 1852415 | 1852897 | 246815 | 247297 | gene=IY08_09875 | protein=membrane protein                      | protein_id=KGT44223.1 |
| gene       | 1852899 | 1854206 | 247299 | 248606 | gene=IY08_09880 | protein=membrane protein                      | protein_id=KGT44224.1 |
| gene       | 1854415 | 1855284 | 248815 | 249684 | gene=IY08_09885 | protein=membrane protein                      | protein_id=KGT44225.1 |
| gene       | 1855541 | 1856188 | 249941 | 250588 | gene=IY08_09890 | protein=CBS domain-containing protein         | protein_id=KGT44226.1 |
| gene       | 1856381 | 1856887 | 250781 | 251287 | gene=IY08_09900 | protein=transposase                           | protein_id=KGT44227.1 |
| gene       | 1856968 | 1857726 | 251368 | 252126 | gene=IY08_09905 | protein=integrase                             | protein_id=KGT44228.1 |
| scaffold11 |         |         |        |        |                 |                                               |                       |
| gene       | 1858514 | 1859860 | 554    | 1900   | gene=IY08_09915 | protein=branched-chain amino acid transporter | protein_id=KGT44134.1 |
| gene       | 1859926 | 1860255 | 1966   | 2295   | gene=IY08_09920 | protein=tRNA-binding protein                  | protein_id=KGT44135.1 |
| gene       | 1860236 | 1860802 | 2276   | 2842   | gene=IY08_09925 | protein=hypothetical protein                  | protein_id=KGT44136.1 |
| gene       | 1860775 | 1861080 | 2815   | 3120   | gene=IY08_09930 | protein=permease                              | protein_id=KGT44137.1 |
| gene       | 1861085 | 1861381 | 3125   | 3421   | gene=IY08_09935 | protein=hypothetical protein                  | protein_id=KGT44138.1 |
| gene       | 1861470 | 1862624 | 3510   | 4664   | gene=IY08_09940 | protein=stage II sporulation protein P        | protein_id=KGT44139.1 |
| gene       | 1862881 | 1863378 | 4921   | 5418   | gene=IY08_09945 | protein=GCN5 family acetyltransferase         | protein_id=KGT44140.1 |
| gene       | 1863390 | 1864130 | 5430   | 6170   | gene=IY08_09950 | protein=D-alanyl-D-alanine carboxypeptidase   | protein_id=KGT44141.1 |
| gene       | 1864154 | 1864600 | 6194   | 6640   | gene=IY08_09955 | protein=DNA mismatch repair protein MutT      | protein_id=KGT44142.1 |
| gene       | 1864817 | 1866034 | 6857   | 8074   | gene=IY08_09960 | protein=macrolide transporter                 | protein_id=KGT44143.1 |
| gene       | 1866309 | 1866737 | 8349   | 8777   | gene=IY08_09965 | protein=hypothetical protein                  | protein_id=KGT44144.1 |
| gene       | 1866740 | 1867708 | 8780   | 9748   | gene=IY08_09970 | protein=peptidase                             | protein_id=KGT44145.1 |
| gene       | 1867778 | 1868932 | 9818   | 10972  | gene=IY08_09975 | protein=stage II sporulation protein P        | protein_id=KGT44146.1 |
| gene       | 1869022 | 1869612 | 11062  | 11652  | gene=IY08_09980 | protein=phosphoglycerate mutase               | protein_id=KGT44147.1 |
| gene       | 1869619 | 1870395 | 11659  | 12435  | gene=IY08_09985 | protein=HAD family hydrolase                  | protein_id=KGT44148.1 |
| gene       | 1870426 | 1870897 | 12466  | 12937  | pseudo          |                                               |                       |
| gene       | 1870913 | 1871374 | 12953  | 13414  | gene=IY08_09995 | protein=hypothetical protein                  | protein_id=KGT44149.1 |
| gene       | 1871546 | 1872721 | 13586  | 14761  | gene=IY08_10000 | protein=alanine racemase                      | protein_id=KGT44150.1 |
| gene       | 1873014 | 1873883 | 15054  | 15923  | gene=IY08_10005 | protein=acetyltransferase                     | protein_id=KGT44151.1 |
| gene       | 1874448 | 1875656 | 16488  | 17696  | gene=IY08_10010 | protein=glycosyl transferase                  | protein_id=KGT44152.1 |
| gene       | 1875837 | 1876682 | 17877  | 18722  | gene=IY08_10015 | protein=membrane protein                      | protein_id=KGT44153.1 |
| gene       | 1876771 | 1878186 | 18811  | 20226  | gene=IY08_10020 | protein=GntR family transcriptional regulator | protein_id=KGT44154.1 |

|      |         |          |       |       |                 |                                              |                       |
|------|---------|----------|-------|-------|-----------------|----------------------------------------------|-----------------------|
| gene | 1878316 | 1878738  | 20356 | 20778 | gene=IY08_10025 | protein=acetyltransferase                    | protein_id=KGT44155.1 |
| gene | 1878912 | 1880039  | 20952 | 22079 | gene=IY08_10030 | protein=serine/threonine protein phosphatase | protein_id=KGT44156.1 |
| gene | 1880060 | 1880686  | 22100 | 22726 | gene=IY08_10035 | protein=membrane protein                     | protein_id=KGT44157.1 |
| gene | 1880823 | 1881389  | 22863 | 23429 | gene=IY08_10040 | protein=acetyltransferase                    | protein_id=KGT44158.1 |
| gene | 1881396 | 1881956  | 23436 | 23996 | gene=IY08_10045 | protein=hypothetical protein                 | protein_id=KGT44159.1 |
| gene | 1881953 | 1882438  | 23993 | 24478 | gene=IY08_10050 | protein=GNAT family acetyltransferase        | protein_id=KGT44160.1 |
| gene | 1882451 | 1882816  | 24491 | 24856 | gene=IY08_10055 | protein=cupin                                | protein_id=KGT44161.1 |
| gene | 1882819 | 1883247  | 24859 | 25287 | gene=IY08_10060 | protein=acetyltransferase                    | protein_id=KGT44162.1 |
| gene | 1883541 | 1883837  | 25581 | 25877 | gene=IY08_10065 | protein=type VII secretion protein EsxA      | protein_id=KGT44163.1 |
| gene | 1883991 | >1885777 | 26031 | 27817 | gene=IY08_10070 | protein=type VII secretion protein           | protein_id=KGT44164.1 |
| gene | 1887614 | 1888117  | 28078 | 29682 | gene=IY08_10075 | protein=type VII secretion protein           | protein_id=KGT44070.1 |
| gene | 1888122 | 1888373  | 29654 | 30157 | gene=IY08_10080 | protein=type VII secretion protein           | protein_id=KGT44071.1 |
| gene | 1888447 | 1889646  | 30162 | 30413 | gene=IY08_10085 | protein=hypothetical protein                 | protein_id=KGT44072.1 |
| gene | 1889686 | 1894191  | 30487 | 31686 | gene=IY08_10090 | protein=membrane protein                     | protein_id=KGT44073.1 |
| gene | 1894188 | 1895009  | 31726 | 36231 | gene=IY08_10095 | protein=cell division protein FtsK           | protein_id=KGT44074.1 |
| gene | 1895027 | 1896490  | 36228 | 37049 | gene=IY08_10100 | protein=hypothetical protein                 | protein_id=KGT44075.1 |
| gene | 1896517 | 1896777  | 37067 | 38530 | gene=IY08_10105 | protein=lipase                               | protein_id=KGT44076.1 |
| gene | 1896779 | 1897096  | 38557 | 38817 | gene=IY08_10110 | protein=hypothetical protein                 | protein_id=KGT44077.1 |
| gene | 1897442 | 1897702  | 38819 | 39136 | gene=IY08_10115 | protein=cytoplasmic protein                  | protein_id=KGT44078.1 |
| gene | 1897715 | 1898353  | 39482 | 39742 | gene=IY08_10120 | protein=hypothetical protein                 | protein_id=KGT44079.1 |
| gene | 1898791 | 1899573  | 39755 | 40393 | gene=IY08_10125 | protein=hypothetical protein                 | protein_id=KGT44080.1 |
| gene | 1899635 | 1900429  | 40831 | 41613 | gene=IY08_10130 | protein=hypothetical protein                 | protein_id=KGT44081.1 |
| gene | 1900457 | 1901254  | 41675 | 42469 | gene=IY08_10135 | protein=hypothetical protein                 | protein_id=KGT44082.1 |
| gene | 1901349 | 1901626  | 42497 | 43294 | gene=IY08_10140 | protein=hypothetical protein                 | protein_id=KGT44083.1 |
| gene | 1901718 | 1902256  | 43389 | 43666 | pseudo          |                                              |                       |
| gene | 1902319 | 1903089  | 43758 | 44296 | pseudo          |                                              |                       |
| gene | 1903151 | 1903921  | 44359 | 45129 | gene=IY08_10155 | protein=hypothetical protein                 | protein_id=KGT44084.1 |
| gene | 1904127 | 1904903  | 45191 | 45961 | gene=IY08_10160 | protein=hypothetical protein                 | protein_id=KGT44085.1 |
| gene | 1905056 | 1905853  | 46167 | 46943 | gene=IY08_10165 | protein=hypothetical protein                 | protein_id=KGT44086.1 |
| gene | 1906137 | 1906922  | 47096 | 47893 | gene=IY08_10170 | protein=hypothetical protein                 | protein_id=KGT44087.1 |
| gene | 1907054 | 1907479  | 48177 | 48962 | gene=IY08_10175 | protein=acetyltransferase                    | protein_id=KGT44088.1 |

|      |         |         |       |       |                 |                                                    |                       |
|------|---------|---------|-------|-------|-----------------|----------------------------------------------------|-----------------------|
| gene | 1907640 | 1908416 | 49094 | 49519 | gene=IY08_10180 | protein=spore protein                              | protein_id=KGT44089.1 |
| gene | 1908468 | 1908788 | 49680 | 50456 | gene=IY08_10185 | protein=oxalate:formate antiporter                 | protein_id=KGT44090.1 |
| gene | 1908858 | 1909070 | 50508 | 50828 | gene=IY08_10190 | protein=hypothetical protein                       | protein_id=KGT44091.1 |
| gene | 1909100 | 1909438 | 50898 | 51110 | gene=IY08_10195 | protein=hypothetical protein                       | protein_id=KGT44092.1 |
| gene | 1909774 | 1910454 | 51140 | 51478 | gene=IY08_10200 | protein=permease                                   | protein_id=KGT44093.1 |
| gene | 1910549 | 1912237 | 51814 | 52494 | gene=IY08_10205 | protein=methyltransferase                          | protein_id=KGT44094.1 |
| gene | 1912328 | 1912855 | 52589 | 54277 | gene=IY08_10210 | protein=formate--tetrahydrofolate ligase           | protein_id=KGT44095.1 |
| gene | 1912875 | 1914044 | 54368 | 54895 | gene=IY08_10215 | protein=hypothetical protein                       | protein_id=KGT44096.1 |
| gene | 1914262 | 1915071 | 54915 | 56084 | gene=IY08_10220 | protein=RNA helicase                               | protein_id=KGT44097.1 |
| gene | 1915127 | 1915510 | 56302 | 57111 | gene=IY08_10225 | protein=hypothetical protein                       | protein_id=KGT44098.1 |
| gene | 1915556 | 1916194 | 57167 | 57550 | gene=IY08_10230 | protein=glyoxalase                                 | protein_id=KGT44099.1 |
| gene | 1916236 | 1917210 | 57596 | 58234 | gene=IY08_10235 | protein=hydrolase                                  | protein_id=KGT44100.1 |
| gene | 1917417 | 1917995 | 58276 | 59250 | gene=IY08_10240 | protein=quinone oxidoreductase                     | protein_id=KGT44101.1 |
| gene | 1917992 | 1918672 | 59457 | 60035 | gene=IY08_10245 | protein=RNA polymerase sigma factor                | protein_id=KGT44102.1 |
| gene | 1918729 | 1919163 | 60032 | 60712 | gene=IY08_10250 | protein=ECF-type sigma factor negative effector    | protein_id=KGT44103.1 |
| gene | 1919249 | 1920220 | 60769 | 61203 | gene=IY08_10255 | protein=membrane protein                           | protein_id=KGT44104.1 |
| gene | 1920316 | 1920525 | 61289 | 62260 | gene=IY08_10260 | protein=beta-lactamase                             | protein_id=KGT44105.1 |
| gene | 1920749 | 1921231 | 62356 | 62565 | gene=IY08_10265 | protein=hypothetical protein                       | protein_id=KGT44106.1 |
| gene | 1921315 | 1923543 | 62789 | 63271 | gene=IY08_10270 | protein=glutathione peroxidase                     | protein_id=KGT44107.1 |
| gene | 1923540 | 1924754 | 63355 | 65583 | gene=IY08_10275 | protein=protease                                   | protein_id=KGT44108.1 |
| gene | 1924754 | 1925716 | 65580 | 66794 | gene=IY08_10280 | protein=hypothetical protein                       | protein_id=KGT44109.1 |
| gene | 1926116 | 1926457 | 66794 | 67756 | gene=IY08_10285 | protein=ATPase AAA                                 | protein_id=KGT44110.1 |
| gene | 1926574 | 1927074 | 68156 | 68497 | gene=IY08_10290 | protein=hypothetical protein                       | protein_id=KGT44111.1 |
| gene | 1927552 | 1931235 | 68614 | 69114 | gene=IY08_10295 | protein=hypothetical protein                       | protein_id=KGT44112.1 |
| gene | 1931225 | 1932700 | 69592 | 73275 | gene=narZ       | protein=nitrate reductase                          | protein_id=KGT44113.1 |
| gene | 1932720 | 1933250 | 73265 | 74740 | gene=narH       | protein=nitrate reductase                          | protein_id=KGT44114.1 |
| gene | 1933268 | 1933957 | 74760 | 75290 | gene=IY08_10310 | protein=nitrate reductase                          | protein_id=KGT44115.1 |
| gene | 1934094 | 1934786 | 75308 | 75997 | gene=IY08_10315 | protein=nitrate reductase                          | protein_id=KGT44116.1 |
| gene | 1935064 | 1936077 | 76134 | 76826 | gene=IY08_10320 | protein=Crp/Fnr family transcriptional regulator   | protein_id=KGT44117.1 |
| gene | 1936095 | 1937108 | 77104 | 78117 | gene=IY08_10325 | protein=molybdenum cofactor biosynthesis protein A | protein_id=KGT44118.1 |
| gene | 1937152 | 1938441 | 78135 | 79148 | gene=IY08_10330 | protein=thiamine biosynthesis protein MoeB         | protein_id=KGT44119.1 |

|      |         |          |        |        |                 |                                                                                                  |                        |
|------|---------|----------|--------|--------|-----------------|--------------------------------------------------------------------------------------------------|------------------------|
| gene | 1938486 | 1938956  | 79192  | 80481  | gene=IY08_10335 | protein=molybdopterin molybdenumtransferase                                                      | protein_id=KGT44120.1  |
| gene | 1938953 | 1939186  | 80526  | 80996  | gene=IY08_10340 | protein=molybdopterin (MPT) converting factor, subunit 2                                         | protein_id=KGT44121.1  |
| gene | 1939267 | 1940436  | 80993  | 81226  | gene=IY08_10345 | protein=molybdenum cofactor biosynthesis protein MoaD                                            | protein_id=KGT44122.1  |
| gene | 1940714 | 1940848  | 81307  | 82476  | gene=IY08_10350 | protein=MFS transporter                                                                          | protein_id=KGT44123.1  |
| gene | 1941108 | 1942025  | 82754  | 82888  | gene=IY08_10355 | protein=hypothetical protein                                                                     | protein_id=KGT44124.1  |
| gene | 1942349 | 1942726  | 83148  | 84065  | gene=IY08_10360 | protein=transporter                                                                              | protein_id=KGT44125.1  |
| gene | 1942917 | 1943390  | 84389  | 84766  | gene=IY08_10365 | protein=hypothetical protein                                                                     | protein_id=KGT44126.1  |
| gene | 1943383 | 1944093  | 84957  | 85430  | gene=IY08_10370 | protein=precorrin-2 dehydrogenase                                                                | protein_id=KGT44127.1  |
| gene | 1944090 | 1945514  | 85423  | 86133  | gene=IY08_10375 | protein=cobalamin biosynthesis protein CbiX                                                      | protein_id=KGT44128.1  |
| gene | 1945573 | 1945890  | 86130  | 87554  | gene=IY08_10380 | protein=uroporphyrinogen-III synthase                                                            | protein_id=KGT44129.1  |
| gene | 1945906 | 1948314  | 87613  | 87930  | gene=IY08_10385 | protein=nitrite reductase                                                                        | protein_id=KGT44130.1  |
| gene | 1948523 | 1949230  | 87946  | 90354  | gene=IY08_10390 | protein=nitrite reductase                                                                        | protein_id=KGT44131.1  |
| gene | 1949433 | >1949614 | 90563  | 91270  | gene=IY08_10395 | protein=regulator of cell morphogenesis and NO signaling, scdA family (2 C-terminal HHE domains) | protein_id=KGT44132.1  |
| gene | 1950529 | 1950681  | 91473  | 91654  | gene=IY08_10400 | protein=calcium-binding protein                                                                  | protein_id=KGT44133.1] |
| gene | 1950900 | 1951109  | 91774  | 92360  | gene=IY08_10405 | protein=calcium-binding protein                                                                  | protein_id=KGT43928.1  |
| gene | 1951206 | 1952045  | 92569  | 92721  | gene=IY08_10410 | protein=exosporium protein G                                                                     | protein_id=KGT43929.1  |
| gene | 1952599 | 1954200  | 92940  | 93149  | gene=IY08_10415 | protein=hypothetical protein                                                                     | protein_id=KGT43930.1  |
| gene | 1954353 | 1954901  | 93246  | 94085  | gene=IY08_10420 | protein=acetyltransferase                                                                        | protein_id=KGT43931.1  |
| gene | 1955511 | 1955786  | 94639  | 96240  | gene=IY08_10425 | protein=hypothetical protein                                                                     | protein_id=KGT43932.1  |
| gene | 1956096 | 1956383  | 96393  | 96941  | gene=IY08_10430 | protein=preprotein translocase                                                                   | protein_id=KGT43933.1  |
| gene | 1956518 | 1956955  | 97551  | 97826  | gene=IY08_10435 | protein=stage V sporulation protein S                                                            | protein_id=KGT43934.1  |
| gene | 1957021 | 1957872  | 98136  | 98423  | gene=IY08_10440 | protein=hypothetical protein                                                                     | protein_id=KGT43935.1  |
| gene | 1958243 | 1958896  | 98558  | 98995  | gene=IY08_10445 | protein=tranposase                                                                               | protein_id=KGT43936.1  |
| gene | 1959216 | 1960352  | 99061  | 99912  | gene=IY08_10450 | protein=transposase                                                                              | protein_id=KGT43937.1  |
| gene | 1960349 | 1960564  | 100283 | 100936 | gene=IY08_10460 | protein=hypothetical protein                                                                     | protein_id=KGT43938.1  |
| gene | 1960987 | 1961679  | 101256 | 102392 | gene=IY08_10465 | protein=aspartate phosphatase                                                                    | protein_id=KGT43939.1  |
| gene | 1961789 | 1962436  | 102389 | 102604 | gene=IY08_10470 | protein=hypothetical protein                                                                     | protein_id=KGT43940.1  |
| gene | 1962433 | 1964328  | 103027 | 103719 | gene=IY08_10475 | protein=hypothetical protein                                                                     | protein_id=KGT43941.1  |
| gene | 1964404 | 1965135  | 103829 | 104476 | gene=IY08_10480 | protein=phosphohydrolase                                                                         | protein_id=KGT43942.1  |
| gene | 1965241 | 1965495  | 104473 | 106368 | gene=IY08_10485 | protein=multidrug ABC transporter ATP-binding protein                                            | protein_id=KGT43943.1  |

|      |         |         |        |        |                 |                                                 |                       |
|------|---------|---------|--------|--------|-----------------|-------------------------------------------------|-----------------------|
| gene | 1965657 | 1965992 | 106444 | 107175 | gene=IY08_10490 | protein=membrane protein                        | protein_id=KGT43944.1 |
| gene | 1966332 | 1966892 | 107281 | 107535 | gene=IY08_10495 | protein=hypothetical protein                    | protein_id=KGT43945.1 |
| gene | 1967310 | 1968437 | 107697 | 108032 | gene=IY08_10500 | protein=single-stranded DNA-binding protein     | protein_id=KGT43946.1 |
| gene | 1968441 | 1968824 | 108372 | 108932 | gene=IY08_10510 | protein=shikimate kinase                        | protein_id=KGT43947.1 |
| gene | 1968908 | 1969342 | 109350 | 110477 | gene=IY08_10515 | protein=PBS lyase                               | protein_id=KGT43948.1 |
| gene | 1969392 | 1970168 | 110481 | 110864 | gene=IY08_10520 | protein=thioredoxin                             | protein_id=KGT43949.1 |
| gene | 1970469 | 1972157 | 110948 | 111382 | gene=IY08_10525 | protein=hypothetical protein                    | protein_id=KGT43950.1 |
| gene | 1972270 | 1972599 | 111432 | 112208 | gene=IY08_10530 | protein=protein-L-IsoD(D-D) O-methyltransferase | protein_id=KGT43951.1 |
| gene | 1972629 | 1972847 | 112509 | 114197 | gene=IY08_10535 | protein=arginine--tRNA ligase                   | protein_id=KGT43952.1 |
| gene | 1972941 | 1973450 | 114310 | 114639 | gene=IY08_10540 | protein=hypothetical protein                    | protein_id=KGT43953.1 |
| gene | 1973828 | 1978030 | 114669 | 114887 | gene=IY08_10545 | protein=hypothetical protein                    | protein_id=KGT43954.1 |
| gene | 1978417 | 1981518 | 114981 | 115490 | pseudo          |                                                 |                       |
| gene | 1981570 | 1982655 | 115868 | 120070 | gene=IY08_10555 | protein=TPR repeat-containing protein           | protein_id=KGT43955.1 |
| gene | 1982657 | 1983241 | 120457 | 123558 | gene=IY08_10560 | protein=isoleucyl-tRNA synthetase               | protein_id=KGT43956.1 |
| gene | 1983573 | 1985084 | 123610 | 124695 | gene=IY08_10565 | protein=membrane protein                        | protein_id=KGT43957.1 |
| gene | 1985192 | 1985671 | 124697 | 125281 | gene=IY08_10570 | protein=TetR family transcriptional regulator   | protein_id=KGT43958.1 |
| gene | 1986213 | 1987511 | 125613 | 127124 | gene=IY08_10575 | protein=peptidase M36                           | protein_id=KGT43959.1 |
| gene | 1988084 | 1989424 | 127232 | 127711 | gene=IY08_10580 | protein=hypothetical protein                    | protein_id=KGT43960.1 |
| gene | 1989499 | 1990374 | 128253 | 129551 | gene=IY08_10585 | protein=aspartyl-tRNA synthetase                | protein_id=KGT43961.1 |
| gene | 1990411 | 1990986 | 130124 | 131464 | gene=IY08_10590 | protein=hypothetical protein                    | protein_id=KGT43962.1 |
| gene | 1991011 | 1991808 | 131539 | 132414 | gene=IY08_10595 | protein=alpha/beta hydrolase                    | protein_id=KGT43963.1 |
| gene | 1991999 | 1992664 | 132451 | 133026 | gene=IY08_10600 | protein=hypothetical protein                    | protein_id=KGT43964.1 |
| gene | 1992869 | 1994308 | 133051 | 133848 | gene=IY08_10605 | protein=membrane protein                        | protein_id=KGT43965.1 |
| gene | 1994388 | 1995590 | 134039 | 134704 | gene=IY08_10610 | protein=5'-nucleotidase                         | protein_id=KGT43966.1 |
| gene | 1995762 | 1996457 | 134909 | 136348 | gene=IY08_10615 | protein=transporter                             | protein_id=KGT43967.1 |
| gene | 1996546 | 1997019 | 136428 | 137630 | gene=IY08_10620 | protein=alcohol dehydrogenase                   | protein_id=KGT43968.1 |
| gene | 1997016 | 1997456 | 137802 | 138497 | gene=IY08_10625 | protein=aspartate racemase                      | protein_id=KGT43969.1 |
| gene | 1997631 | 1998116 | 138586 | 139059 | gene=IY08_10630 | protein=transcriptional regulator               | protein_id=KGT43970.1 |
| gene | 1998127 | 1998345 | 139056 | 139496 | gene=IY08_10635 | protein=acetyltransferase                       | protein_id=KGT43971.1 |
| gene | 1998587 | 1999114 | 139671 | 140156 | gene=IY08_10640 | protein=membrane protein                        | protein_id=KGT43972.1 |
| gene | 1999145 | 1999576 | 140167 | 140385 | gene=IY08_10645 | protein=XRE family transcriptional regulator    | protein_id=KGT43973.1 |



|      |         |         |        |        |                 |                                                      |                       |
|------|---------|---------|--------|--------|-----------------|------------------------------------------------------|-----------------------|
| gene | 1999730 | 2000439 | 140627 | 141154 | gene=IY08_10650 | protein=hypothetical protein                         | protein_id=KGT43974.1 |
| gene | 2000432 | 2001646 | 141185 | 141616 | gene=IY08_10655 | protein=GCN5 family acetyltransferase                | protein_id=KGT43975.1 |
| gene | 2001914 | 2002501 | 141770 | 142479 | pseudo          |                                                      |                       |
| gene | 2002606 | 2003241 | 142472 | 143686 | gene=IY08_10665 | protein=ABC transporter permease                     | protein_id=KGT43976.1 |
| gene | 2003243 | 2003629 | 143954 | 144541 | gene=IY08_10670 | protein=cell division protein FtsK                   | protein_id=KGT43977.1 |
| gene | 2003641 | 2004573 | 144646 | 145281 | gene=IY08_10675 | protein=HAD family hydrolase                         | protein_id=KGT43978.1 |
| gene | 2004624 | 2006081 | 145283 | 145669 | gene=IY08_10680 | protein=hypothetical protein                         | protein_id=KGT43979.1 |
| gene | 2006280 | 2007236 | 145681 | 146613 | gene=IY08_10685 | protein=aminoglycoside phosphotransferase            | protein_id=KGT43980.1 |
| gene | 2007256 | 2007744 | 146664 | 148121 | gene=IY08_10690 | protein=penicillin-binding protein                   | protein_id=KGT43981.1 |
| gene | 2007900 | 2009885 | 148320 | 149276 | gene=IY08_10695 | protein=thymidylate synthase                         | protein_id=KGT43982.1 |
| gene | 2010127 | 2010762 | 149296 | 149784 | gene=IY08_10700 | protein=dihydrofolate reductase                      | protein_id=KGT43983.1 |
| gene | 2010873 | 2011592 | 149940 | 151925 | gene=IY08_10705 | protein=MecA protein                                 | protein_id=KGT43984.1 |
| gene | 2011634 | 2012290 | 152167 | 152802 | gene=IY08_10710 | protein=FMN-dependent NADH-azoreductase              | protein_id=KGT43985.1 |
| gene | 2012504 | 2012689 | 152913 | 153632 | gene=IY08_10715 | protein=acyl-phosphate glycerol 3-phosphate          | protein_id=KGT43986.1 |
| gene | 2012732 | 2013472 | 153674 | 154330 | gene=IY08_10720 | protein=hemolysin D                                  | protein_id=KGT43987.1 |
| gene | 2013802 | 2014053 | 154544 | 154729 | gene=tatA       | protein=preprotein translocase subunit SecA          | protein_id=KGT43988.1 |
| gene | 2014208 | 2015050 | 154772 | 155512 | gene=IY08_10730 | protein=preprotein translocase subunit TatC          | protein_id=KGT43989.1 |
| gene | 2015380 | 2016354 | 155842 | 156093 | gene=IY08_10735 | protein=hypothetical protein                         | protein_id=KGT43990.1 |
| gene | 2016690 | 2017277 | 156248 | 157090 | gene=IY08_10740 | protein=DegV domain-containing protein               | protein_id=KGT43991.1 |
| gene | 2017313 | 2017774 | 157420 | 158394 | gene=IY08_10745 | protein=membrane protein                             | protein_id=KGT43992.1 |
| gene | 2017992 | 2019893 | 158730 | 159317 | gene=IY08_10750 | protein=cysteine ABC transporter ATP-binding protein | protein_id=KGT43993.1 |
| gene | 2019987 | 2020346 | 159353 | 159814 | gene=IY08_10755 | protein=molecular chaperone Hsp20                    | protein_id=KGT43994.1 |
| gene | 2020398 | 2020727 | 160032 | 161933 | gene=IY08_10760 | protein=asparagine synthase                          | protein_id=KGT43995.1 |
| gene | 2020830 | 2021801 | 162027 | 162386 | gene=IY08_10765 | protein=acetyltransferase                            | protein_id=KGT43996.1 |
| gene | 2022041 | 2023003 | 162438 | 162767 | gene=IY08_10770 | protein=hypothetical protein                         | protein_id=KGT43997.1 |
| gene | 2023130 | 2024005 | 162870 | 163841 | gene=IY08_10775 | protein=sporulation protein                          | protein_id=KGT43998.1 |
| gene | 2024104 | 2024751 | 164081 | 165043 | gene=IY08_10780 | protein=iron(III) dicitrate-binding protein          | protein_id=KGT43999.1 |
| gene | 2025010 | 2025498 | 165170 | 166045 | gene=IY08_10785 | protein=D-amino acid aminotransferase                | protein_id=KGT44000.1 |
| gene | 2025624 | 2025818 | 166144 | 166791 | gene=IY08_10790 | protein=NAD(P)H nitroreductase                       | protein_id=KGT44001.1 |
| gene | 2025930 | 2026478 | 167050 | 167538 | gene=IY08_10795 | protein=lipoprotein                                  | protein_id=KGT44002.1 |
| gene | 2026829 | 2027266 | 167664 | 167858 | gene=IY08_10800 | protein=hypothetical protein                         | protein_id=KGT44003.1 |

|      |         |         |        |        |                 |                                                                    |                       |
|------|---------|---------|--------|--------|-----------------|--------------------------------------------------------------------|-----------------------|
| gene | 2027559 | 2028452 | 167970 | 168518 | gene=IY08_10805 | protein=isochorismatase                                            | protein_id=KGT44004.1 |
| gene | 2028610 | 2029728 | 168869 | 169306 | gene=IY08_10810 | protein=molecular chaperone Hsp20                                  | protein_id=KGT44005.1 |
| gene | 2029743 | 2030384 | 169599 | 170492 | gene=IY08_10815 | protein=mechanosensitive ion channel protein                       | protein_id=KGT44006.1 |
| gene | 2030589 | 2031443 | 170650 | 171768 | gene=IY08_10820 | protein=histidine kinase                                           | protein_id=KGT44007.1 |
| gene | 2031606 | 2032463 | 171783 | 172424 | gene=IY08_10825 | protein=LuxR family transcriptional regulator                      | protein_id=KGT44008.1 |
| gene | 2032757 | 2033794 | 172629 | 173483 | gene=IY08_10830 | protein=RpiR family transcriptional regulator                      | protein_id=KGT44009.1 |
| gene | 2033944 | 2034963 | 173646 | 174503 | gene=IY08_10835 | protein=phenazine biosynthesis protein PhzF                        | protein_id=KGT44010.1 |
| gene | 2034960 | 2035862 | 174797 | 175834 | gene=adhP       | protein=ethanol-active dehydrogenase/acetaldehyde-active reductase | protein_id=KGT44011.1 |
| gene | 2036426 | 2037964 | 175984 | 177003 | gene=IY08_10845 | protein=peptide ABC transporter permease                           | protein_id=KGT44012.1 |
| gene | 2037979 | 2039328 | 177000 | 177902 | gene=IY08_10850 | protein=membrane protein                                           | protein_id=KGT44013.1 |
| gene | 2039347 | 2040243 | 178466 | 180004 | gene=IY08_10855 | protein=gluconokinase                                              | protein_id=KGT44014.1 |
| gene | 2040577 | 2041797 | 180019 | 181368 | gene=IY08_10860 | protein=permease DsdX                                              | protein_id=KGT44015.1 |
| gene | 2041832 | 2042986 | 181387 | 182283 | gene=IY08_10865 | protein=6-phosphogluconate dehydrogenase                           | protein_id=KGT44016.1 |
| gene | 2043131 | 2043667 | 182617 | 183837 | gene=IY08_10870 | protein=glycosyl transferase                                       | protein_id=KGT44017.1 |
| gene | 2043669 | 2044898 | 183872 | 185026 | gene=IY08_10875 | protein=DNA-binding protein                                        | protein_id=KGT44018.1 |
| gene | 2044963 | 2045520 | 185171 | 185707 | gene=IY08_10880 | protein=NADH-ubiquinone oxidoreductase                             | protein_id=KGT44019.1 |
| gene | 2045621 | 2046568 | 185709 | 186938 | gene=IY08_10885 | protein=MFS transporter                                            | protein_id=KGT44020.1 |
| gene | 2046572 | 2048083 | 187003 | 187560 | gene=IY08_10890 | protein=cytoplasmic protein                                        | protein_id=KGT44021.1 |
| gene | 2048297 | 2049724 | 187661 | 188608 | gene=IY08_10895 | protein=glycine/betaine ABC transporter ATP-binding                | protein_id=KGT44022.1 |
| gene | 2049802 | 2050062 | 188612 | 190123 | gene=IY08_10900 | protein=glycine/betaine ABC transporter permease                   | protein_id=KGT44023.1 |
| gene | 2050168 | 2051985 | 190337 | 191764 | gene=IY08_10905 | protein=amino acid APC transporter                                 | protein_id=KGT44024.1 |
| gene | 2051975 | 2053825 | 191842 | 192102 | gene=IY08_10910 | protein=LemA domain protein                                        | protein_id=KGT44025.1 |
| gene | 2054102 | 2054698 | 192208 | 194025 | gene=IY08_10915 | protein=hypothetical protein                                       | protein_id=KGT44026.1 |
| gene | 2054795 | 2055337 | 194015 | 195865 | gene=IY08_10920 | protein=hypothetical protein                                       | protein_id=KGT44027.1 |
| gene | 2055692 | 2057047 | 196142 | 196738 | gene=IY08_10925 | protein=hypothetical protein                                       | protein_id=KGT44028.1 |
| gene | 2057180 | 2058604 | 196835 | 197377 | gene=racA       | protein=chromosome segregation protein                             | protein_id=KGT44029.1 |
| gene | 2058707 | 2059099 | 197732 | 199087 | gene=IY08_10935 | protein=membrane protein                                           | protein_id=KGT44030.1 |
| gene | 2059349 | 2060467 | 199220 | 200644 | gene=IY08_10940 | protein=aldehyde dehydrogenase                                     | protein_id=KGT44031.1 |
| gene | 2060501 | 2061250 | 200747 | 201139 | gene=IY08_10945 | protein=hypothetical protein                                       | protein_id=KGT44032.1 |
| gene | 2062204 | 2063514 | 201389 | 202507 | gene=IY08_10950 | protein=histidine kinase                                           | protein_id=KGT44033.1 |

|      |         |         |        |        |                 |                                            |                       |
|------|---------|---------|--------|--------|-----------------|--------------------------------------------|-----------------------|
| gene | 2063511 | 2064209 | 202541 | 203290 | gene=IY08_10955 | protein=hypothetical protein               | protein_id=KGT44034.1 |
| gene | 2064194 | 2064856 | 204244 | 205554 | gene=IY08_10960 | protein=hypothetical protein               | protein_id=KGT44035.1 |
| gene | 2064872 | 2066140 | 205551 | 206249 | gene=IY08_10965 | protein=CoA-transferase                    | protein_id=KGT44036.1 |
| gene | 2066137 | 2067036 | 206234 | 206896 | gene=IY08_10970 | protein=CoA-transferase                    | protein_id=KGT44037.1 |
| gene | 2067206 | 2068585 | 206912 | 208180 | gene=IY08_10975 | protein=acetylornithine deacetylase        | protein_id=KGT44038.1 |
| gene | 2068796 | 2070217 | 208177 | 209076 | gene=IY08_10980 | protein=beta-lysine acetyltransferase      | protein_id=KGT44039.1 |
| gene | 2070214 | 2070486 | 209246 | 210625 | gene=IY08_10985 | protein=ATPase AAA                         | protein_id=KGT44040.1 |
| gene | 2070559 | 2070774 | 210836 | 212257 | gene=IY08_10990 | protein=lysine 2,3-aminomutase             | protein_id=KGT44041.1 |
| gene | 2071025 | 2071687 | 212254 | 212526 | gene=IY08_10995 | protein=hypothetical protein               | protein_id=KGT44042.1 |
| gene | 2071692 | 2071847 | 212599 | 212814 | gene=IY08_11000 | protein=hypothetical protein               | protein_id=KGT44043.1 |
| gene | 2071997 | 2072176 | 213065 | 213727 | gene=IY08_11005 | protein=hypothetical protein               | protein_id=KGT44044.1 |
| gene | 2072287 | 2072469 | 213732 | 213887 | gene=IY08_11010 | protein=hypothetical protein               | protein_id=KGT44045.1 |
| gene | 2072469 | 2073290 | 214037 | 214216 | gene=IY08_11015 | protein=hypothetical protein               | protein_id=KGT44046.1 |
| gene | 2073272 | 2074027 | 214327 | 214509 | gene=IY08_11020 | protein=hypothetical protein               | protein_id=KGT44047.1 |
| gene | 2074099 | 2074740 | 214509 | 215330 | gene=IY08_11025 | protein=serine/threonine protein kinase    | protein_id=KGT44048.1 |
| gene | 2074730 | 2075611 | 215312 | 216067 | gene=IY08_11030 | protein=sporulation protein SpoOM          | protein_id=KGT44049.1 |
| gene | 2075965 | 2076279 | 216139 | 216780 | gene=IY08_11035 | protein=phosphoesterase                    | protein_id=KGT44050.1 |
| gene | 2077092 | 2077331 | 216770 | 217651 | gene=IY08_11040 | protein=transporter                        | protein_id=KGT44051.1 |
| gene | 2077596 | 2077871 | 218005 | 218319 | gene=IY08_11045 | protein=thioredoxin                        | protein_id=KGT44052.1 |
| gene | 2078014 | 2078265 | 219132 | 219371 | gene=IY08_11055 | protein=hypothetical protein               | protein_id=KGT44053.1 |
| gene | 2078403 | 2078939 | 219636 | 219911 | gene=IY08_11060 | protein=hypothetical protein               | protein_id=KGT44054.1 |
| gene | 2079636 | 2079830 | 220054 | 220305 | gene=IY08_11065 | protein=alpha/beta hydrolase               | protein_id=KGT44055.1 |
| gene | 2080492 | 2081496 | 220443 | 220979 | gene=IY08_11070 | protein=ABC transporter permease           | protein_id=KGT44056.1 |
| gene | 2081689 | 2082540 | 221676 | 221870 | gene=IY08_11075 | protein=hypothetical protein               | protein_id=KGT44057.1 |
| gene | 2082944 | 2083162 | 222532 | 223536 | gene=IY08_11085 | protein=N-acetylmuramoyl-L-alanine amidase | protein_id=KGT44058.1 |
| gene | 2083412 | 2083642 | 223729 | 224580 | gene=prsA       | protein=peptidylprolyl isomerase           | protein_id=KGT44059.1 |
| gene | 2084131 | 2084466 | 224984 | 225202 | gene=IY08_11095 | protein=hypothetical protein               | protein_id=KGT44060.1 |
| gene | 2084675 | 2084890 | 225452 | 225682 | gene=IY08_11100 | protein=hypothetical protein               | protein_id=KGT44061.1 |
| gene | 2085098 | 2085433 | 226171 | 226506 | gene=IY08_11110 | protein=hypothetical protein               | protein_id=KGT44062.1 |
| gene | 2085478 | 2085679 | 226715 | 226930 | gene=IY08_11115 | protein=spore germination protein GerPF    | protein_id=KGT44063.1 |
| gene | 2085822 | 2086529 | 227138 | 227473 | gene=IY08_11120 | protein=hypothetical protein               | protein_id=KGT44064.1 |

|      |         |          |        |        |                 |                                                   |                       |
|------|---------|----------|--------|--------|-----------------|---------------------------------------------------|-----------------------|
| gene | 2086669 | 2087322  | 227518 | 227719 | pseudo          |                                                   |                       |
| gene | 2087437 | 2087649  | 227862 | 228569 | gene=IY08_11130 | protein=short-chain dehydrogenase                 | protein_id=KGT44065.1 |
| gene | 2087717 | 2087926  | 228709 | 229362 | gene=IY08_11135 | protein=AraC family transcriptional regulator     | protein_id=KGT44066.1 |
| gene | 2088393 | >2090645 | 229477 | 229689 | gene=IY08_11140 | protein=hemolysin BL lytic component L2           | protein_id=KGT44067.1 |
| gene | 2091307 | 2091588  | 229757 | 229966 | gene=IY08_11145 | protein=hypothetical protein                      | protein_id=KGT44068.1 |
| gene | 2091824 | 2092099  | 230433 | 232685 | gene=IY08_11150 | protein=penicillin-binding protein                | partial=3'            |
| gene | 2092115 | 2092405  | 233347 | 233628 | gene=IY08_11160 | protein=hypothetical protein                      | protein_id=KGT43804.1 |
| gene | 2092801 | 2093922  | 233864 | 234139 | gene=IY08_11165 | protein=MFS transporter                           | protein_id=KGT43805.1 |
| gene | 2094021 | 2095457  | 234155 | 234445 | gene=IY08_11170 | protein=cytoplasmic protein                       | protein_id=KGT43806.1 |
| gene | 2095476 | 2096384  | 234841 | 235962 | gene=IY08_11175 | protein=citrate synthase 3                        | protein_id=KGT43807.1 |
| gene | 2096537 | 2098246  | 236061 | 237497 | gene=prpD       | protein=2-methylcitrate dehydratase               | protein_id=KGT43808.1 |
| gene | 2098263 | 2099153  | 237516 | 238424 | gene=IY08_11185 | protein=methylisocitrate lyase                    | protein_id=KGT43809.1 |
| gene | 2099176 | 2100636  | 238577 | 240286 | gene=IY08_11190 | protein=acyl-CoA dehydrogenase                    | protein_id=KGT43810.1 |
| gene | 2100707 | 2101339  | 240303 | 241193 | gene=IY08_11195 | protein=3-hydroxyisobutyrate dehydrogenase        | protein_id=KGT43811.1 |
| gene | 2101592 | 2102647  | 241216 | 242676 | gene=IY08_11200 | protein=methylmalonate-semialdehyde dehydrogenase | protein_id=KGT43812.1 |
| gene | 2102977 | 2103234  | 242747 | 243379 | gene=IY08_11205 | protein=lysine transporter LysE                   | protein_id=KGT43813.1 |
| gene | 2103419 | 2103658  | 243632 | 244687 | gene=IY08_11210 | protein=3-hydroxyisobutyryl-CoA hydrolase         | protein_id=KGT43814.1 |
| gene | 2103674 | 2104831  | 245017 | 245274 | gene=IY08_11215 | protein=hypothetical protein                      | protein_id=KGT43815.1 |
| gene | 2104828 | 2107917  | 245459 | 245698 | gene=IY08_11220 | protein=hypothetical protein                      | protein_id=KGT43816.1 |
| gene | 2108025 | 2108198  | 245714 | 246871 | gene=IY08_11225 | protein=DNA repair exonuclease                    | protein_id=KGT43817.1 |
| gene | 2108534 | 2108833  | 246868 | 249957 | gene=IY08_11230 | protein=exonuclease                               | protein_id=KGT43818.1 |
| gene | 2108892 | 2109077  | 250065 | 250238 | gene=IY08_11235 | protein=membrane protein                          | protein_id=KGT43819.1 |
| gene | 2109290 | 2109436  | 250574 | 250873 | gene=IY08_11240 | protein=ArsR family transcriptional regulator     | protein_id=KGT43820.1 |
| gene | 2109433 | 2110635  | 250932 | 251117 | gene=IY08_11245 | protein=hypothetical protein                      | protein_id=KGT43821.1 |
| gene | 2111263 | 2112048  | 251330 | 251476 | gene=IY08_11250 | protein=hypothetical protein                      | protein_id=KGT43822.1 |
| gene | 2112074 | 2113273  | 251473 | 252675 | gene=IY08_11255 | protein=membrane protein                          | protein_id=KGT43823.1 |
| gene | 2113286 | 2114902  | 253303 | 254088 | gene=IY08_11260 | protein=2,3-dihydroxybenzoate-2,3-dehydrogenase   | protein_id=KGT43824.1 |
| gene | 2114927 | 2115820  | 254114 | 255313 | gene=IY08_11265 | protein=isochorismate synthase                    | protein_id=KGT43825.1 |
| gene | 2115854 | 2123011  | 255326 | 256942 | gene=entE       | protein=enterobactin synthase subunit E           | protein_id=KGT43826.1 |
| gene | 2123008 | 2123232  | 256967 | 257860 | gene=IY08_11275 | protein=Isochorismatase                           | protein_id=KGT43827.1 |
| gene | 2123232 | 2124662  | 257894 | 265051 | gene=IY08_11280 | protein=diguanylate cyclase                       | protein_id=KGT43828.1 |

|      |         |         |        |        |                 |                                                        |                       |
|------|---------|---------|--------|--------|-----------------|--------------------------------------------------------|-----------------------|
| gene | 2124720 | 2125469 | 265048 | 265272 | gene=IY08_11285 | protein=antibiotic transporter                         | protein_id=KGT43829.1 |
| gene | 2125495 | 2126037 | 265272 | 266702 | gene=IY08_11290 | protein=DSBA oxidoreductase                            | protein_id=KGT43830.1 |
| gene | 2126078 | 2126350 | 266760 | 267509 | gene=IY08_11295 | protein=4'-phosphopantetheinyl transferase             | protein_id=KGT43831.1 |
| gene | 2126555 | 2127319 | 267535 | 268077 | gene=IY08_11300 | protein=cold-shock protein                             | protein_id=KGT43832.1 |
| gene | 2127337 | 2127861 | 268118 | 268390 | gene=IY08_11305 | protein=DNA-binding protein                            | protein_id=KGT43833.1 |
| gene | 2127953 | 2129146 | 268595 | 269359 | gene=IY08_11310 | protein=serine hydroxymethyltransferase                | protein_id=KGT43834.1 |
| gene | 2129378 | 2130745 | 269377 | 269901 | gene=IY08_11315 | protein=diguanylate cyclase                            | protein_id=KGT43835.1 |
| gene | 2131183 | 2131758 | 269993 | 271186 | gene=IY08_11320 | protein=alkaline serine protease                       | protein_id=KGT43836.1 |
| gene | 2131927 | 2132253 | 271418 | 272785 | gene=IY08_11325 | protein=transporter                                    | protein_id=KGT43837.1 |
| gene | 2132457 | 2133077 | 273223 | 273798 | gene=IY08_11330 | protein=hypothetical protein                           | protein_id=KGT43838.1 |
| gene | 2133263 | 2133970 | 273967 | 274293 | gene=IY08_11335 | protein=hypothetical protein                           | protein_id=KGT43839.1 |
| gene | 2134621 | 2136543 | 274497 | 275117 | gene=IY08_11340 | protein=antibiotic biosynthesis monooxygenase          | protein_id=KGT43840.1 |
| gene | 2136793 | 2137560 | 275303 | 276010 | gene=IY08_11345 | protein=pseudouridine synthase                         | protein_id=KGT43841.1 |
| gene | 2137572 | 2139452 | 276661 | 278583 | gene=IY08_11350 | protein=threonine--tRNA ligase                         | protein_id=KGT43842.1 |
| gene | 2139724 | 2140755 | 278833 | 279600 | gene=IY08_11355 | protein=bacitracin ABC transporter ATP-binding protein | protein_id=KGT43843.1 |
| gene | 2140975 | 2141675 | 279612 | 281492 | gene=IY08_11360 | protein=ABC transporter permease                       | protein_id=KGT43844.1 |
| gene | 2141795 | 2142661 | 281764 | 282795 | gene=IY08_11365 | protein=alpha/beta hydrolase                           | protein_id=KGT43845.1 |
| gene | 2142663 | 2143664 | 283015 | 283715 | pseudo          |                                                        |                       |
| gene | 2143710 | 2145410 | 283835 | 284701 | gene=IY08_11375 | protein=peptide ABC transporter permease               | protein_id=KGT43846.1 |
| gene | 2145546 | 2146283 | 284703 | 285704 | pseudo          |                                                        |                       |
| gene | 2146439 | 2147305 | 285750 | 287450 | gene=IY08_11385 | protein=pyruvate oxidase                               | protein_id=KGT43847.1 |
| gene | 2147452 | 2148393 | 287586 | 288323 | gene=IY08_11390 | protein=zinc uptake transporter                        | protein_id=KGT43848.1 |
| gene | 2148427 | 2149029 | 288479 | 289345 | gene=IY08_11395 | protein=Zn-dependent hydrolase                         | protein_id=KGT43849.1 |
| gene | 2149237 | 2149722 | 289492 | 290433 | gene=IY08_11400 | protein=ABC transporter substrate-binding protein      | protein_id=KGT43850.1 |
| gene | 2149896 | 2150321 | 290467 | 291069 | gene=IY08_11405 | protein=hypothetical protein                           | protein_id=KGT43851.1 |
| gene | 2150340 | 2151035 | 291277 | 291762 | gene=IY08_11410 | protein=hypothetical protein                           | protein_id=KGT43852.1 |
| gene | 2151052 | 2151522 | 291936 | 292361 | gene=IY08_11415 | protein=membrane protein                               | protein_id=KGT43853.1 |
| gene | 2152138 | 2152545 | 292380 | 293075 | gene=IY08_11420 | protein=catabolite gene activator protein              | protein_id=KGT43854.1 |
| gene | 2152662 | 2153315 | 293092 | 293562 | gene=IY08_11425 | protein=membrane protein                               | protein_id=KGT43855.1 |
| gene | 2153438 | 2154061 | 294178 | 294585 | gene=IY08_11430 | protein=acetyltransferase                              | protein_id=KGT43856.1 |
| gene | 2154183 | 2156414 | 294702 | 295355 | gene=IY08_11435 | protein=hydrolase                                      | protein_id=KGT43857.1 |

|      |         |         |        |        |                 |                                                       |                       |
|------|---------|---------|--------|--------|-----------------|-------------------------------------------------------|-----------------------|
| gene | 2156462 | 2156644 | 295478 | 296101 | gene=IY08_11440 | protein=TetR family transcriptional regulator         | protein_id=KGT43858.1 |
| gene | 2156845 | 2157495 | 296223 | 298454 | gene=IY08_11445 | protein=membrane protein                              | protein_id=KGT43859.1 |
| gene | 2157824 | 2158348 | 298502 | 298684 | gene=IY08_11450 | protein=hypothetical protein                          | protein_id=KGT43860.1 |
| gene | 2158404 | 2159330 | 298885 | 299535 | gene=IY08_11455 | protein=chloramphenicol acetyltransferase             | protein_id=KGT43861.1 |
| gene | 2159490 | 2159999 | 299864 | 300388 | gene=IY08_11460 | protein=acetyltransferase                             | protein_id=KGT43862.1 |
| gene | 2160025 | 2160912 | 300444 | 301370 | gene=IY08_11465 | protein=acetyltransferase                             | protein_id=KGT43863.1 |
| gene | 2161083 | 2161643 | 301530 | 302039 | gene=IY08_11470 | protein=acetyltransferase                             | protein_id=KGT43864.1 |
| gene | 2161677 | 2162624 | 302065 | 302952 | gene=IY08_11475 | protein=membrane protein                              | protein_id=KGT43865.1 |
| gene | 2162795 | 2162944 | 303123 | 303683 | gene=IY08_11480 | protein=DNA-binding protein                           | protein_id=KGT43866.1 |
| gene | 2163122 | 2164513 | 303717 | 304664 | gene=IY08_11485 | protein=hypothetical protein                          | protein_id=KGT43867.1 |
| gene | 2164569 | 2165117 | 304835 | 304984 | gene=IY08_11490 | protein=stage 0 sporulation regulatory protein        | protein_id=KGT43868.1 |
| gene | 2165426 | 2165977 | 305162 | 306553 | gene=IY08_11495 | protein=protoporphyrinogen oxidase                    | protein_id=KGT43869.1 |
| gene | 2166021 | 2166206 | 306609 | 307157 | gene=IY08_11500 | protein=hypothetical protein                          | protein_id=KGT43870.1 |
| gene | 2166293 | 2166496 | 307466 | 308017 | gene=IY08_11505 | protein=acetyltransferase                             | protein_id=KGT43871.1 |
| gene | 2166889 | 2167785 | 308061 | 308246 | gene=IY08_11510 | protein=cold-shock protein                            | protein_id=KGT43872.1 |
| gene | 2167803 | 2168444 | 308333 | 308536 | gene=IY08_11515 | protein=cold-shock protein                            | protein_id=KGT43873.1 |
| gene | 2168702 | 2169307 | 308929 | 309825 | gene=IY08_11520 | protein=CAAX protease                                 | protein_id=KGT43874.1 |
| gene | 2169378 | 2170244 | 309843 | 310484 | gene=IY08_11525 | protein=chloramphenicol acetyltransferase             | protein_id=KGT43875.1 |
| gene | 2170374 | 2171417 | 310742 | 311347 | gene=IY08_11530 | protein=CTP synthase                                  | protein_id=KGT43876.1 |
| gene | 2171547 | 2171978 | 311418 | 312284 | gene=IY08_11535 | protein=LysR family transcriptional regulator         | protein_id=KGT43877.1 |
| gene | 2172287 | 2172550 | 312414 | 313457 | gene=IY08_11540 | protein=aspartate-semialdehyde dehydrogenase          | protein_id=KGT43878.1 |
| gene | 2172647 | 2173549 | 313587 | 314018 | gene=IY08_11545 | protein=hypothetical protein                          | protein_id=KGT43879.1 |
| gene | 2173706 | 2174395 | 314327 | 314590 | gene=IY08_11550 | protein=hypothetical protein                          | protein_id=KGT43880.1 |
| gene | 2174654 | 2175541 | 314687 | 315589 | gene=IY08_11555 | protein=LysR family transcriptional regulator         | protein_id=KGT43881.1 |
| gene | 2175575 | 2176171 | 315746 | 316435 | gene=IY08_11560 | protein=cytoplasmic protein                           | protein_id=KGT43882.1 |
| gene | 2176393 | 2178147 | 316694 | 317581 | gene=IY08_11565 | protein=acetyltransferase                             | protein_id=KGT43883.1 |
| gene | 2178140 | 2179936 | 317615 | 318211 | gene=IY08_11570 | protein=hypothetical protein                          | protein_id=KGT43884.1 |
| gene | 2180005 | 2180148 | 318433 | 320187 | gene=IY08_11575 | protein=multidrug ABC transporter ATP-binding protein | protein_id=KGT43885.1 |
| gene | 2180573 | 2181076 | 320180 | 321976 | gene=IY08_11580 | protein=multidrug ABC transporter ATP-binding protein | protein_id=KGT43886.1 |
| gene | 2181462 | 2181746 | 322045 | 322188 | gene=IY08_11585 | protein=integrase                                     | protein_id=KGT43887.1 |
| gene | 2181997 | 2182269 | 322613 | 323116 | gene=IY08_11590 | protein=membrane protein                              | protein_id=KGT43888.1 |

|      |         |         |        |        |                 |                                                 |                       |
|------|---------|---------|--------|--------|-----------------|-------------------------------------------------|-----------------------|
| gene | 2182655 | 2183443 | 323502 | 323786 | gene=IY08_11595 | protein=hypothetical protein                    | protein_id=KGT43889.1 |
| gene | 2183872 | 2184504 | 324037 | 324309 | gene=IY08_11600 | protein=hypothetical protein                    | protein_id=KGT43890.1 |
| gene | 2184720 | 2185685 | 324695 | 325483 | gene=IY08_11605 | protein=hypothetical protein                    | protein_id=KGT43891.1 |
| gene | 2186243 | 2187538 | 325912 | 326544 | gene=IY08_11610 | protein=BclA protein                            | protein_id=KGT43892.1 |
| gene | 2188104 | 2188736 | 326760 | 327725 | gene=IY08_11615 | protein=triple helix repeat-containing collagen | protein_id=KGT43893.1 |
| gene | 2188966 | 2189271 | 328283 | 329578 | gene=IY08_11620 | protein=spore surface glycoprotein BclB         | protein_id=KGT43894.1 |
| gene | 2189365 | 2190675 | 330144 | 330776 | gene=IY08_11625 | protein=cupin                                   | protein_id=KGT43895.1 |
| gene | 2190653 | 2191522 | 331006 | 331311 | gene=IY08_11630 | protein=hypothetical protein                    | protein_id=KGT43896.1 |
| gene | 2191556 | 2191714 | 331405 | 332715 | gene=IY08_11635 | protein=dehydrogenase                           | protein_id=KGT43897.1 |
| gene | 2192020 | 2192613 | 332693 | 333562 | gene=IY08_11640 | protein=RNA polymerase sigma factor SigJ        | protein_id=KGT43898.1 |
| gene | 2192927 | 2194039 | 333596 | 333754 | gene=IY08_11645 | protein=phosphoesterase                         | protein_id=KGT43899.1 |
| gene | 2194064 | 2194897 | 334060 | 334653 | gene=IY08_11650 | protein=methyltransferase                       | protein_id=KGT43900.1 |
| gene | 2194956 | 2196515 | 334967 | 336079 | gene=IY08_11655 | protein=Tellurite resistance protein            | protein_id=KGT43901.1 |
| gene | 2196743 | 2197048 | 336104 | 336937 | gene=IY08_11660 | protein=hypothetical protein                    | protein_id=KGT43902.1 |
| gene | 2197060 | 2198343 | 336996 | 338555 | gene=IY08_11665 | protein=hypothetical protein                    | protein_id=KGT43903.1 |
| gene | 2198422 | 2198688 | 338783 | 339088 | gene=IY08_11670 | protein=PTS cellobiose transporter subunit IIB  | protein_id=KGT43904.1 |
| gene | 2198711 | 2199883 | 339100 | 340383 | gene=IY08_11675 | protein=PTS lactose transporter subunit IIC     | protein_id=KGT43905.1 |
| gene | 2199880 | 2200773 | 340462 | 340728 | gene=IY08_11680 | protein=hypothetical protein                    | protein_id=KGT43906.1 |
| gene | 2200912 | 2201460 | 340751 | 341923 | gene=IY08_11685 | protein=anhydro-N-acetylmuramic acid kinase     | protein_id=KGT43907.1 |
| gene | 2201531 | 2203114 | 341920 | 342813 | gene=IY08_11690 | protein=ATPase                                  | protein_id=KGT43908.1 |
| gene | 2203189 | 2204190 | 342952 | 343500 | gene=IY08_11695 | protein=glycerol-3-phosphate acyltransferase    | protein_id=KGT43909.1 |
| gene | 2204422 | 2204892 | 343571 | 345154 | gene=IY08_11700 | protein=acetyltransferase                       | protein_id=KGT43910.1 |
| gene | 2205036 | 2206271 | 345229 | 346230 | gene=IY08_11705 | protein=threonine dehydratase                   | protein_id=KGT43911.1 |
| gene | 2206493 | 2206822 | 346462 | 346932 | gene=IY08_11710 | protein=MarR family transcriptional regulator   | protein_id=KGT43912.1 |
| gene | 2207070 | 2207756 | 347076 | 348311 | gene=IY08_11715 | protein=MFS transporter                         | protein_id=KGT43913.1 |
| gene | 2208129 | 2209505 | 348533 | 348862 | gene=IY08_11720 | protein=hypothetical protein                    | protein_id=KGT43914.1 |
| gene | 2210859 | 2211071 | 349110 | 349796 | gene=IY08_11725 | protein=metal-dependent hydrolase               | protein_id=KGT43915.1 |
| gene | 2211414 | 2212049 | 350169 | 351545 | gene=IY08_11735 | protein=RNA helicase                            | protein_id=KGT43916.1 |
| gene | 2212114 | 2213358 | 352899 | 353111 | gene=IY08_11750 | protein=hypothetical protein                    | protein_id=KGT43917.1 |
| gene | 2213700 | 2214014 | 353454 | 354089 | gene=IY08_11755 | protein=TetR family transcriptional regulator   | protein_id=KGT43918.1 |
| gene | 2214142 | 2214375 | 354154 | 355398 | gene=IY08_11760 | protein=ABC transporter permease                | protein_id=KGT43919.1 |

|            |         |         |        |        |                 |                                                    |                       |
|------------|---------|---------|--------|--------|-----------------|----------------------------------------------------|-----------------------|
| gene       | 2215255 | 2215959 | 355740 | 356054 | gene=IY08_11765 | protein=ABC transporter permease                   | protein_id=KGT43920.1 |
| gene       | 2216871 | 2217581 | 356182 | 356415 | gene=IY08_11770 | protein=hypothetical protein                       | protein_id=KGT43921.1 |
| gene       | 2218354 | 2218662 | 357295 | 357999 | gene=IY08_11775 | protein=triple helix repeat-containing collagen    | protein_id=KGT43922.1 |
| gene       | 2218880 | 2219077 | 358911 | 359621 | gene=IY08_11780 | protein=hypothetical protein                       | protein_id=KGT43923.1 |
| gene       | 2219196 | 2219366 | 360394 | 360702 | gene=IY08_11790 | protein=hypothetical protein                       | protein_id=KGT43924.1 |
| gene       | 2219394 | 2219866 | 360920 | 361117 | gene=IY08_11800 | protein=zinc finger protein 100                    | protein_id=KGT43925.1 |
| gene       | 2219866 | 2220408 | 361236 | 361406 | gene=IY08_11805 | protein=phage protein                              | protein_id=KGT43926.1 |
| gene       | 1886038 | 1887642 | 361434 | 361906 | pseudo          |                                                    |                       |
| gene       | 1949734 | 1950320 | 361906 | 362448 | gene=IY08_11815 | protein=integrase                                  | protein_id=KGT43927.1 |
| scaffold12 |         |         |        |        |                 |                                                    |                       |
| gene       | 2221004 | 2221420 | 404    | 820    | gene=IY08_11820 | protein=methyltransferase                          | protein_id=KGT43773.1 |
| gene       | 2221704 | 2222414 | 1104   | 1814   | gene=IY08_11825 | protein=membrane protein                           | protein_id=KGT43774.1 |
| gene       | 2223500 | 2223931 | 2900   | 3331   | gene=IY08_11840 | protein=hypothetical protein                       | protein_id=KGT43775.1 |
| gene       | 2224549 | 2226228 | 3949   | 5628   | gene=IY08_11850 | protein=hypothetical protein                       | protein_id=KGT43776.1 |
| gene       | 2227299 | 2228000 | 6699   | 7400   | gene=IY08_11855 | protein=hypothetical protein                       | protein_id=KGT43777.1 |
| gene       | 2228127 | 2229011 | 7527   | 8411   | gene=IY08_11860 | protein=hypothetical protein                       | protein_id=KGT43778.1 |
| gene       | 2229558 | 2230031 | 8958   | 9431   | gene=IY08_11865 | protein=hypothetical protein                       | protein_id=KGT43779.1 |
| gene       | 2230554 | 2230664 | 9954   | 10064  | pseudo          |                                                    |                       |
| gene       | 2230764 | 2231474 | 10164  | 10874  | gene=IY08_11875 | protein=methyltransferase                          | protein_id=KGT43780.1 |
| gene       | 2231592 | 2231999 | 10992  | 11399  | gene=IY08_11880 | protein=3-demethylubiquinone-9 3-methyltransferase | protein_id=KGT43781.1 |
| gene       | 2232559 | 2234244 | 11959  | 13644  | gene=IY08_11890 | protein=indolepyruvate decarboxylase               | protein_id=KGT43782.1 |
| gene       | 2234352 | 2234834 | 13752  | 14234  | gene=IY08_11895 | protein=MarR family transcriptional regulator      | protein_id=KGT43783.1 |
| gene       | 2235001 | 2235738 | 14401  | 15138  | gene=gpmA       | protein=phosphoglyceromutase                       | protein_id=KGT43784.1 |
| gene       | 2235976 | 2236713 | 15376  | 16113  | gene=IY08_11905 | protein=stage II sporulation protein SB            | protein_id=KGT43785.1 |
| gene       | 2236826 | 2236954 | 16226  | 16354  | gene=IY08_11910 | protein=D-alanyl-D-alanine carboxypeptidase        | protein_id=KGT43786.1 |
| gene       | 2237027 | 2237203 | 16427  | 16603  | gene=IY08_11915 | protein=stage III sporulation protein AA           | protein_id=KGT43787.1 |
| gene       | 2237222 | 2237611 | 16622  | 17011  | gene=IY08_11920 | protein=cytoplasmic protein                        | protein_id=KGT43788.1 |
| gene       | 2237823 | 2239292 | 17223  | 18692  | gene=IY08_11925 | protein=aminoacyl-histidine dipeptidase            | protein_id=KGT43789.1 |
| gene       | 2239538 | 2240347 | 18938  | 19747  | gene=IY08_11930 | protein=hypothetical protein                       | protein_id=KGT43790.1 |
| gene       | 2240373 | 2240975 | 19773  | 20375  | gene=IY08_11935 | protein=hypothetical protein                       | protein_id=KGT43791.1 |
| gene       | 2241216 | 2241467 | 20616  | 20867  | gene=IY08_11940 | protein=LuxR family transcriptional regulator      | protein_id=KGT43792.1 |



|      |         |         |       |       |                 |                                             |                        |
|------|---------|---------|-------|-------|-----------------|---------------------------------------------|------------------------|
| gene | 2241844 | 2242722 | 21244 | 22122 | gene=IY08_11945 | protein=DNA-binding protein                 | protein_id=KGT43793.1  |
| gene | 2242863 | 2243141 | 22263 | 22541 | gene=IY08_11950 | protein=transition state regulator Abh      | protein_id=KGT43794.1  |
| gene | 2243661 | 2244911 | 23061 | 24311 | gene=IY08_11955 | protein=hypothetical protein                | protein_id=KGT43795.1  |
| gene | 2244979 | 2245737 | 24379 | 25137 | gene=IY08_11960 | protein=hypothetical protein                | protein_id=KGT43796.1  |
| gene | 2245991 | 2246650 | 25391 | 26050 | gene=IY08_11965 | protein=chloramphenicol acetyltransferase   | protein_id=KGT43797.1  |
| gene | 2246982 | 2248295 | 26382 | 27695 | gene=IY08_11970 | protein=D-alanyl-D-alanine carboxypeptidase | protein_id=KGT43798.1  |
| gene | 2248716 | 2249306 | 28116 | 28706 | gene=IY08_11975 | protein=lipase                              | protein_id=KGT43799.1  |
| gene | 2250374 | 2251627 | 29774 | 31027 | gene=IY08_11980 | protein=MFS transporter                     | protein_id=KGT43800.1  |
| gene | 2251641 | 2256197 | 31041 | 35597 | gene=IY08_11985 | protein=peptide synthetase                  | protein_id=KGT43801.1  |
| gene | 2256200 | 2262670 | 35600 | 42070 | gene=IY08_11990 | protein=peptide synthetase                  | protein_id=KGT43802.1  |
| gene | 2262667 | 2264129 | 42067 | 43529 | gene=IY08_11995 | protein=hypothetical protein                | protein_id=KGT43803.1  |
| gene | 2264209 | 2277562 | 43609 | 56962 | gene=IY08_12000 | protein=thioester reductase                 | protein_id=KGT43706.1] |
| gene | 2277884 | 2278588 | 57284 | 57988 | gene=IY08_12005 | protein=4'-phosphopantetheinyl transferase  | protein_id=KGT43707.1  |
| gene | 2278575 | 2279297 | 57975 | 58697 | gene=IY08_12010 | protein=thioesterase                        | protein_id=KGT43708.1  |
| gene | 2279417 | 2279499 | 58817 | 58899 | tRNA            |                                             |                        |
| gene | 2279638 | 2279710 | 59038 | 59110 | tRNA            |                                             |                        |
| gene | 2281161 | 2281745 | 60561 | 61145 | gene=IY08_12025 | protein=succinoglycan biosynthesis protein  | protein_id=KGT43709.1  |
| gene | 2282243 | 2282890 | 61643 | 62290 | gene=IY08_12030 | protein=antigen                             | protein_id=KGT43710.1  |
| gene | 2283193 | 2283699 | 62593 | 63099 | gene=IY08_12035 | protein=acetyltransferase                   | protein_id=KGT43711.1  |
| gene | 2284066 | 2284251 | 63466 | 63651 | gene=IY08_12040 | protein=hypothetical protein                | protein_id=KGT43712.1  |
| gene | 2285198 | 2286616 | 64598 | 66016 | gene=IY08_12050 | protein=glucosaminidase                     | protein_id=KGT43713.1  |
| gene | 2287613 | 2287945 | 67013 | 67345 | gene=IY08_12055 | protein=hypothetical protein                | protein_id=KGT43714.1  |
| gene | 2288062 | 2288574 | 67462 | 67974 | gene=IY08_12060 | protein=protein kinase                      | protein_id=KGT43715.1  |
| gene | 2289445 | 2290518 | 68845 | 69918 | gene=IY08_12065 | protein=patatin                             | protein_id=KGT43716.1  |
| gene | 2290631 | 2290831 | 70031 | 70231 | gene=IY08_12070 | protein=hypothetical protein                | protein_id=KGT43717.1  |
| gene | 2291337 | 2291591 | 70737 | 70991 | gene=IY08_12075 | protein=hypothetical protein                | protein_id=KGT43718.1  |
| gene | 2292230 | 2292928 | 71630 | 72328 | gene=IY08_12080 | protein=serine dehydratase                  | protein_id=KGT43719.1  |
| gene | 2292950 | 2293840 | 72350 | 73240 | gene=IY08_12085 | protein=serine dehydratase                  | protein_id=KGT43720.1  |
| gene | 2294131 | 2295450 | 73531 | 74850 | gene=IY08_12090 | protein=septum formation initiator          | protein_id=KGT43721.1  |
| gene | 2295739 | 2295963 | 75139 | 75363 | gene=IY08_12095 | protein=hypothetical protein                | protein_id=KGT43722.1  |
| gene | 2296252 | 2296425 | 75652 | 75825 | gene=IY08_12100 | protein=asparagine synthase                 | protein_id=KGT43723.1  |

|      |         |         |        |        |                 |                                                   |                       |
|------|---------|---------|--------|--------|-----------------|---------------------------------------------------|-----------------------|
| gene | 2296601 | 2296864 | 76001  | 76264  | gene=IY08_12105 | protein=SplA                                      | protein_id=KGT43724.1 |
| gene | 2296861 | 2297889 | 76261  | 77289  | gene=IY08_12110 | protein=radical SAM protein                       | protein_id=KGT43725.1 |
| gene | 2298062 | 2299147 | 77462  | 78547  | pseudo          |                                                   |                       |
| gene | 2299639 | 2300586 | 79039  | 79986  | gene=IY08_12120 | protein=2Fe-2S ferredoxin                         | protein_id=KGT43726.1 |
| gene | 2300773 | 2301894 | 80173  | 81294  | gene=IY08_12125 | protein=cell division protein FtsW                | protein_id=KGT43727.1 |
| gene | 2303212 | 2304540 | 82612  | 83940  | gene=IY08_12130 | protein=magnesium transporter                     | protein_id=KGT43728.1 |
| gene | 2304698 | 2305795 | 84098  | 85195  | gene=IY08_12135 | protein=branched-chain amino acid ABC transporter | protein_id=KGT43729.1 |
| gene | 2306075 | 2308042 | 85475  | 87442  | gene=IY08_12140 | protein=MecA protein                              | protein_id=KGT43730.1 |
| gene | 2308448 | 2308981 | 87848  | 88381  | gene=IY08_12145 | protein=RNA polymerase subunit sigma-24           | protein_id=KGT43731.1 |
| gene | 2308971 | 2309798 | 88371  | 89198  | gene=IY08_12150 | protein=ECF-type sigma factor negative effector   | protein_id=KGT43732.1 |
| gene | 2309813 | 2311570 | 89213  | 90970  | gene=IY08_12155 | protein=penicillin-binding protein                | protein_id=KGT43733.1 |
| gene | 2311955 | 2314087 | 91355  | 93487  | gene=IY08_12160 | protein=penicillin-binding protein                | protein_id=KGT43734.1 |
| gene | 2314306 | 2315232 | 93706  | 94632  | gene=IY08_12165 | protein=beta-lactamase                            | protein_id=KGT43735.1 |
| gene | 2315490 | 2316332 | 94890  | 95732  | gene=IY08_12170 | protein=phosphoesterase                           | protein_id=KGT43736.1 |
| gene | 2316547 | 2316798 | 95947  | 96198  | gene=IY08_12175 | protein=hypothetical protein                      | protein_id=KGT43737.1 |
| gene | 2316982 | 2317707 | 96382  | 97107  | gene=IY08_12180 | protein=ABC transporter ATP-binding protein       | protein_id=KGT43738.1 |
| gene | 2317704 | 2318723 | 97104  | 98123  | gene=IY08_12185 | protein=ABC transporter permease                  | protein_id=KGT43739.1 |
| gene | 2318748 | 2319401 | 98148  | 98801  | gene=IY08_12190 | protein=TetR family transcriptional regulator     | protein_id=KGT43740.1 |
| gene | 2319524 | 2319823 | 98924  | 99223  | gene=IY08_12195 | protein=GNAT family acetyltransferase             | protein_id=KGT43741.1 |
| gene | 2320057 | 2321025 | 99457  | 100425 | gene=IY08_12200 | protein=cytoplasmic protein                       | protein_id=KGT43742.1 |
| gene | 2321242 | 2322387 | 100642 | 101787 | gene=IY08_12205 | protein=acyl-CoA dehydrogenase                    | protein_id=KGT43743.1 |
| gene | 2322403 | 2323740 | 101803 | 103140 | gene=IY08_12210 | protein=biotin carboxylase                        | protein_id=KGT43744.1 |
| gene | 2323767 | 2323982 | 103167 | 103382 | gene=IY08_12215 | protein=acetyl-CoA carboxylase                    | protein_id=KGT43745.1 |
| gene | 2324004 | 2324915 | 103404 | 104315 | gene=IY08_12220 | protein=hydroxymethylglutaryl-CoA lyase           | protein_id=KGT43746.1 |
| gene | 2324920 | 2325708 | 104320 | 105108 | gene=IY08_12225 | protein=enoyl-CoA hydratase                       | protein_id=KGT43747.1 |
| gene | 2325711 | 2327252 | 105111 | 106652 | gene=IY08_12230 | protein=carboxylase                               | protein_id=KGT43748.1 |
| gene | 2327302 | 2329242 | 106702 | 108642 | gene=IY08_12235 | protein=AMP-dependent synthetase                  | protein_id=KGT43749.1 |
| gene | 2329564 | 2329896 | 108964 | 109296 | gene=IY08_12240 | protein=hypothetical protein                      | protein_id=KGT43750.1 |
| gene | 2330493 | 2330849 | 109893 | 110249 | gene=IY08_12245 | protein=hypothetical protein                      | protein_id=KGT43751.1 |
| gene | 2330955 | 2331488 | 110355 | 110888 | gene=IY08_12250 | protein=aminoglycoside adenylyltransferase        | protein_id=KGT43752.1 |
| gene | 2331543 | 2332103 | 110943 | 111503 | gene=IY08_12255 | protein=hypothetical protein                      | protein_id=KGT43753.1 |

|      |         |         |        |        |                 |                                                    |                       |
|------|---------|---------|--------|--------|-----------------|----------------------------------------------------|-----------------------|
| gene | 2332096 | 2332836 | 111496 | 112236 | gene=IY08_12260 | protein=hydrolase                                  | protein_id=KGT43754.1 |
| gene | 2332839 | 2333101 | 112239 | 112501 | pseudo          |                                                    |                       |
| gene | 2333355 | 2333492 | 112755 | 112892 | gene=IY08_12270 | protein=hypothetical protein                       | protein_id=KGT43755.1 |
| gene | 2333828 | 2334844 | 113228 | 114244 | gene=IY08_12275 | protein=D-alanyl-D-alanine carboxypeptidase        | protein_id=KGT43756.1 |
| gene | 2335021 | 2336178 | 114421 | 115578 | gene=IY08_12280 | protein=histidine kinase                           | protein_id=KGT43757.1 |
| gene | 2336168 | 2336863 | 115568 | 116263 | gene=IY08_12285 | protein=PhoB family transcriptional regulator      | protein_id=KGT43758.1 |
| gene | 2337056 | 2337664 | 116456 | 117064 | gene=IY08_12290 | protein=HAD family hydrolase                       | protein_id=KGT43759.1 |
| gene | 2337678 | 2338049 | 117078 | 117449 | pseudo          |                                                    |                       |
| gene | 2338221 | 2338325 | 117621 | 117725 | gene=IY08_12300 | protein=hypothetical protein                       | protein_id=KGT43772.1 |
| gene | 2338349 | 2339086 | 117749 | 118486 | gene=IY08_12305 | protein=S-adenosylhomocysteine nucleosidase        | protein_id=KGT43760.1 |
| gene | 2339230 | 2340078 | 118630 | 119478 | gene=IY08_12310 | protein=acetyltransferase                          | protein_id=KGT43761.1 |
| gene | 2340270 | 2340644 | 119670 | 120044 | gene=IY08_12315 | protein=hypothetical protein                       | protein_id=KGT43762.1 |
| gene | 2340820 | 2343501 | 120220 | 122901 | gene=IY08_12320 | protein=peptidase M4                               | protein_id=KGT43763.1 |
| gene | 2343834 | 2345060 | 123234 | 124460 | gene=IY08_12325 | protein=AraC family transcriptional regulator      | protein_id=KGT43764.1 |
| gene | 2345622 | 2347313 | 125022 | 126713 | gene=IY08_12330 | protein=adhesin                                    | protein_id=KGT43765.1 |
| gene | 2347356 | 2348204 | 126756 | 127604 | gene=IY08_12335 | protein=sortase                                    | protein_id=KGT43766.1 |
| gene | 2348353 | 2350590 | 127753 | 129990 | gene=IY08_12340 | protein=collagen-binding protein                   | protein_id=KGT43767.1 |
| gene | 2350747 | 2351309 | 130147 | 130709 | pseudo          |                                                    |                       |
| gene | 2351550 | 2352029 | 130950 | 131429 | gene=IY08_12350 | protein=activator of Hsp90 ATPase 1 family protein | protein_id=KGT43768.1 |
| gene | 2352109 | 2355279 | 131509 | 134679 | gene=IY08_12355 | protein=excinuclease ABC subunit A                 | protein_id=KGT43769.1 |
| gene | 2355673 | 2356014 | 135073 | 135414 | gene=IY08_12360 | protein=PadR family transcriptional regulator      | protein_id=KGT43770.1 |
| gene | 2356011 | 2356542 | 135411 | 135942 | pseudo          |                                                    |                       |
| gene | 2356523 | 2357478 | 135923 | 136878 | gene=IY08_12370 | protein=penicillin-binding protein                 | partial=3'            |
| gene | 2357561 | 2357977 | 136961 | 137377 | gene=IY08_12375 | protein=hypothetical protein                       | protein_id=KGT43663.1 |
| gene | 2358093 | 2358905 | 137493 | 138305 | gene=IY08_12380 | protein=MerR family transcriptional regulator      | protein_id=KGT43664.1 |
| gene | 2358976 | 2360202 | 138376 | 139602 | gene=IY08_12385 | protein=macrolide transporter                      | protein_id=KGT43665.1 |
| gene | 2360940 | 2361692 | 140340 | 141092 | gene=IY08_12395 | protein=SAM-dependent methyltransferase            | protein_id=KGT43666.1 |
| gene | 2361821 | 2362654 | 141221 | 142054 | gene=IY08_12400 | protein=lipase                                     | protein_id=KGT43667.1 |
| gene | 2362772 | 2363566 | 142172 | 142966 | gene=IY08_12405 | protein=glyoxalase                                 | protein_id=KGT43668.1 |
| gene | 2363683 | 2364381 | 143083 | 143781 | pseudo          |                                                    |                       |
| gene | 2364460 | 2365407 | 143860 | 144807 | gene=IY08_12415 | protein=protein kinase                             | protein_id=KGT43669.1 |

|      |         |         |        |        |                 |                                                        |                       |
|------|---------|---------|--------|--------|-----------------|--------------------------------------------------------|-----------------------|
| gene | 2365949 | 2366677 | 145349 | 146077 | gene=IY08_12420 | protein=AraC family transcriptional regulator          | protein_id=KGT43670.1 |
| gene | 2366692 | 2368383 | 146092 | 147783 | gene=IY08_12425 | protein=oligoendopeptidase F                           | protein_id=KGT43671.1 |
| gene | 2368554 | 2369147 | 147954 | 148547 | gene=IY08_12430 | protein=lipoprotein                                    | protein_id=KGT43672.1 |
| gene | 2369218 | 2370597 | 148618 | 149997 | gene=IY08_12435 | protein=GntR family transcriptional regulator          | protein_id=KGT43673.1 |
| gene | 2370770 | 2371012 | 150170 | 150412 | gene=IY08_12440 | protein=transposase                                    | protein_id=KGT43674.1 |
| gene | 2371076 | 2372038 | 150476 | 151438 | gene=IY08_12445 | protein=DeoR family transcriptional regulator          | protein_id=KGT43675.1 |
| gene | 2372113 | 2372742 | 151513 | 152142 | gene=IY08_12450 | protein=glutamine amidotransferase                     | protein_id=KGT43676.1 |
| gene | 2373114 | 2373317 | 152514 | 152717 | gene=IY08_12455 | protein=hypothetical protein                           | protein_id=KGT43677.1 |
| gene | 2373346 | 2373588 | 152746 | 152988 | gene=IY08_12460 | protein=hypothetical protein                           | protein_id=KGT43678.1 |
| gene | 2373698 | 2374619 | 153098 | 154019 | pseudo          |                                                        |                       |
| gene | 2374820 | 2374987 | 154220 | 154387 | gene=IY08_12470 | protein=DOD family homing endonuclease                 | protein_id=KGT43679.1 |
| gene | 2375179 | 2375676 | 154579 | 155076 | gene=IY08_12475 | protein=membrane protein                               | protein_id=KGT43680.1 |
| gene | 2375911 | 2376540 | 155311 | 155940 | gene=IY08_12480 | protein=methyltransferase                              | protein_id=KGT43681.1 |
| gene | 2376794 | 2377495 | 156194 | 156895 | gene=IY08_12485 | protein=methyltransferase                              | protein_id=KGT43682.1 |
| gene | 2377492 | 2378394 | 156892 | 157794 | gene=IY08_12490 | protein=SMP-30/gluconolactonase/LRE domain protein     | protein_id=KGT43683.1 |
| gene | 2378539 | 2378709 | 157939 | 158109 | gene=IY08_12495 | protein=hypothetical protein                           | protein_id=KGT43684.1 |
| gene | 2379121 | 2380674 | 158521 | 160074 | gene=IY08_12500 | protein=lysyl-tRNA synthetase                          | protein_id=KGT43685.1 |
| gene | 2380734 | 2381162 | 160134 | 160562 | gene=IY08_12505 | protein=cell wall hydrolase                            | protein_id=KGT43686.1 |
| gene | 2381313 | 2382227 | 160713 | 161627 | pseudo          |                                                        |                       |
| gene | 2382354 | 2383061 | 161754 | 162461 | gene=IY08_12515 | protein=transcriptional regulator                      | protein_id=KGT43687.1 |
| gene | 2383058 | 2384041 | 162458 | 163441 | gene=IY08_12520 | protein=membrane protein                               | protein_id=KGT43688.1 |
| gene | 2384482 | 2386110 | 163882 | 165510 | gene=IY08_12525 | protein=elongation factor 3                            | protein_id=KGT43689.1 |
| gene | 2386131 | 2386715 | 165531 | 166115 | gene=IY08_12530 | protein=acetyltransferase                              | protein_id=KGT43690.1 |
| gene | 2386972 | 2387742 | 166372 | 167142 | gene=IY08_12535 | protein=bacitracin ABC transporter ATP-binding protein | protein_id=KGT43691.1 |
| gene | 2387717 | 2389648 | 167117 | 169048 | gene=IY08_12540 | protein=ABC transporter permease                       | protein_id=KGT43692.1 |
| gene | 2389717 | 2390385 | 169117 | 169785 | gene=IY08_12545 | protein=hypothetical protein                           | protein_id=KGT43693.1 |
| gene | 2390462 | 2390803 | 169862 | 170203 | gene=IY08_12550 | protein=hypothetical protein                           | protein_id=KGT43694.1 |
| gene | 2391084 | 2392325 | 170484 | 171725 | gene=IY08_12555 | protein=lipase                                         | protein_id=KGT43695.1 |
| gene | 2392413 | 2393438 | 171813 | 172838 | gene=IY08_12560 | protein=homoserine dehydrogenase                       | protein_id=KGT43696.1 |
| gene | 2393528 | 2394976 | 172928 | 174376 | gene=IY08_12565 | protein=GntR family transcriptional regulator          | protein_id=KGT43697.1 |
| gene | 2394981 | 2395895 | 174381 | 175295 | gene=IY08_12570 | protein=D-alanine--D-alanine ligase                    | protein_id=KGT43698.1 |

|            |         |         |        |        |                 |                                               |                       |
|------------|---------|---------|--------|--------|-----------------|-----------------------------------------------|-----------------------|
| gene       | 2396202 | 2396891 | 175602 | 176291 | gene=IY08_12575 | protein=thiaminase                            | protein_id=KGT43699.1 |
| gene       | 2397289 | 2397552 | 176689 | 176952 | gene=IY08_12580 | protein=hypothetical protein                  | protein_id=KGT43700.1 |
| gene       | 2398115 | 2398408 | 177515 | 177808 | gene=IY08_12585 | protein=sporulation lipoprotein YhcN/YlaJ     | protein_id=KGT43701.1 |
| gene       | 2398810 | 2399271 | 178210 | 178671 | gene=IY08_12590 | protein=nucleoside 2-deoxyribosyltransferase  | protein_id=KGT43702.1 |
| gene       | 2399623 | 2399918 | 179023 | 179318 | pseudo          |                                               |                       |
| gene       | 2400593 | 2401294 | 179993 | 180694 | gene=IY08_12615 | protein=hypothetical protein                  | protein_id=KGT43703.1 |
| gene       | 2401333 | 2402442 | 180733 | 181842 | gene=IY08_12620 | protein=integrase                             | protein_id=KGT43704.1 |
| gene       | 2402734 | 2402865 | 182134 | 182265 | gene=IY08_12625 | protein=exosporium leader peptide             | protein_id=KGT43705.1 |
| gene       | 2402913 | 2404016 | 182313 | 183416 | gene=IY08_12630 | protein=collagen triple helix repeat protein  | protein_id=KGT43644.1 |
| gene       | 2404581 | 2405732 | 183981 | 185132 | gene=IY08_12635 | protein=hypothetical protein                  | protein_id=KGT43645.1 |
| gene       | 2405770 | 2405916 | 185170 | 185316 | gene=IY08_12640 | protein=complement C1q protein                | protein_id=KGT43646.1 |
| gene       | 2406241 | 2406594 | 185641 | 185994 | gene=IY08_12650 | protein=XRE family transcriptional regulator  | protein_id=KGT43647.1 |
| gene       | 2406795 | 2406986 | 186195 | 186386 | gene=IY08_12655 | protein=XRE family transcriptional regulator  | protein_id=KGT43648.1 |
| gene       | 2407043 | 2407309 | 186443 | 186709 | gene=IY08_12660 | protein=DNA-binding protein                   | protein_id=KGT43649.1 |
| gene       | 2407309 | 2407473 | 186709 | 186873 | gene=IY08_12665 | protein=phage protein                         | protein_id=KGT43650.1 |
| gene       | 2407531 | 2408586 | 186931 | 187986 | gene=IY08_12670 | protein=primosomal replication protein N      | protein_id=KGT43651.1 |
| gene       | 2408590 | 2408868 | 187990 | 188268 | gene=IY08_12675 | protein=AbrB family transcriptional regulator | protein_id=KGT43652.1 |
| gene       | 2408861 | 2409220 | 188261 | 188620 | gene=IY08_12680 | protein=cell division protein SepF            | protein_id=KGT43653.1 |
| gene       | 2409239 | 2409406 | 188639 | 188806 | gene=IY08_12685 | protein=phage protein                         | protein_id=KGT43654.1 |
| gene       | 2409432 | 2409683 | 188832 | 189083 | gene=IY08_12690 | protein=hypothetical protein                  | protein_id=KGT43655.1 |
| gene       | 2409703 | 2410185 | 189103 | 189585 | gene=IY08_12695 | protein=nucleotide pyrophosphohydrolase       | protein_id=KGT43656.1 |
| gene       | 2410426 | 2411787 | 189826 | 191187 | gene=IY08_12700 | protein=hypothetical protein                  | protein_id=KGT43657.1 |
| gene       | 2412565 | 2412864 | 191965 | 192264 | gene=IY08_12705 | protein=hypothetical protein                  | protein_id=KGT43658.1 |
| gene       | 2412949 | 2413404 | 192349 | 192804 | gene=IY08_12710 | protein=MarR family transcriptional regulator | protein_id=KGT43659.1 |
| gene       | 2413794 | 2415092 | 193194 | 194492 | gene=IY08_12715 | protein=hypothetical protein                  | protein_id=KGT43660.1 |
| gene       | 2415635 | 2415832 | 195035 | 195232 | gene=IY08_12720 | protein=hypothetical protein                  | protein_id=KGT43661.1 |
| gene       | 2415993 | 2416175 | 195393 | 195575 | gene=IY08_12725 | protein=hypothetical protein                  | protein_id=KGT43662.1 |
| scaffold13 |         |         |        |        |                 |                                               |                       |
| gene       | 2416526 | 2416723 | 206    | 403    | gene=IY08_12730 | protein=zinc finger protein 100               | protein_id=KGT43556.1 |
| gene       | 2416840 | 2417001 | 520    | 681    | gene=IY08_12735 | protein=phage protein                         | protein_id=KGT43557.1 |
| gene       | 2417029 | 2417511 | 709    | 1191   | gene=IY08_12740 | protein=ArpU family transcriptional regulator | protein_id=KGT43558.1 |

|      |         |         |       |       |                 |                                                 |                       |
|------|---------|---------|-------|-------|-----------------|-------------------------------------------------|-----------------------|
| gene | 2417511 | 2418053 | 1191  | 1733  | gene=IY08_12745 | protein=integrase                               | protein_id=KGT43559.1 |
| gene | 2418268 | 2419218 | 1948  | 2898  | gene=IY08_12750 | protein=nucleoside hydrolase                    | protein_id=KGT43560.1 |
| gene | 2419682 | 2420068 | 3362  | 3748  | gene=IY08_12755 | protein=hypothetical protein                    | protein_id=KGT43561.1 |
| gene | 2420912 | 2421346 | 4592  | 5026  | gene=IY08_12765 | protein=hypothetical protein                    | protein_id=KGT43562.1 |
| gene | 2421641 | 2421853 | 5321  | 5533  | gene=IY08_12775 | protein=phage protein                           | protein_id=KGT43563.1 |
| gene | 2421989 | 2422276 | 5669  | 5956  | gene=IY08_12780 | protein=transglycosylase                        | protein_id=KGT43564.1 |
| gene | 2422257 | 2422631 | 5937  | 6311  | gene=IY08_12785 | protein=hypothetical protein                    | protein_id=KGT43565.1 |
| gene | 2422637 | 2423014 | 6317  | 6694  | gene=IY08_12790 | protein=HNH endonuclease                        | protein_id=KGT43566.1 |
| gene | 2423152 | 2423652 | 6832  | 7332  | gene=IY08_12795 | protein=terminase                               | protein_id=KGT43567.1 |
| gene | 2423649 | 2425343 | 7329  | 9023  | gene=IY08_12800 | protein=terminase                               | protein_id=KGT43568.1 |
| gene | 2425532 | 2426785 | 9212  | 10465 | gene=IY08_12810 | protein=portal protein                          | protein_id=KGT43569.1 |
| gene | 2426772 | 2427482 | 10452 | 11162 | gene=IY08_12815 | protein=peptidase                               | protein_id=KGT43570.1 |
| gene | 2427519 | 2428691 | 11199 | 12371 | gene=IY08_12820 | protein=phage portal protein                    | protein_id=KGT43571.1 |
| gene | 2428712 | 2428999 | 12392 | 12679 | gene=IY08_12825 | protein=DNA-packaging protein                   | protein_id=KGT43572.1 |
| gene | 2428986 | 2429309 | 12666 | 12989 | gene=IY08_12830 | protein=head-tail adaptor protein               | protein_id=KGT43573.1 |
| gene | 2429302 | 2429736 | 12982 | 13416 | gene=IY08_12835 | protein=HK97 family phage protein               | protein_id=KGT43574.1 |
| gene | 2429733 | 2430092 | 13413 | 13772 | gene=IY08_12840 | protein=hypothetical protein                    | protein_id=KGT43575.1 |
| gene | 2430093 | 2430698 | 13773 | 14378 | gene=IY08_12845 | protein=tail protein                            | protein_id=KGT43576.1 |
| gene | 2430748 | 2431065 | 14428 | 14745 | gene=IY08_12850 | protein=hypothetical protein                    | protein_id=KGT43577.1 |
| gene | 2431287 | 2432603 | 14967 | 16283 | gene=IY08_12860 | protein=tail protein                            | protein_id=KGT43578.1 |
| gene | 2432784 | 2435402 | 16464 | 19082 | gene=IY08_12865 | protein=tail protein                            | protein_id=KGT43579.1 |
| gene | 2435417 | 2436898 | 19097 | 20578 | gene=IY08_12870 | protein=phage tail protein                      | protein_id=KGT43580.1 |
| gene | 2436895 | 2440977 | 20575 | 24657 | gene=IY08_12875 | protein=phage minor structural protein          | protein_id=KGT43581.1 |
| gene | 2441015 | 2441251 | 24695 | 24931 | gene=IY08_12880 | protein=hypothetical protein                    | protein_id=KGT43582.1 |
| gene | 2441251 | 2441490 | 24931 | 25170 | gene=IY08_12885 | protein=holin                                   | protein_id=KGT43583.1 |
| gene | 2441487 | 2442551 | 25167 | 26231 | gene=IY08_12890 | protein=N-acetylmuramoyl-L-alanine amidase      | protein_id=KGT43584.1 |
| gene | 2442593 | 2443432 | 26273 | 27112 | gene=IY08_12895 | protein=triple helix repeat-containing collagen | protein_id=KGT43585.1 |
| gene | 2443557 | 2443730 | 27237 | 27410 | gene=IY08_12900 | protein=asparagine synthase                     | protein_id=KGT43586.1 |
| gene | 2444113 | 2445795 | 27793 | 29475 | gene=IY08_12905 | protein=hypothetical protein                    | protein_id=KGT43587.1 |
| gene | 2446003 | 2446770 | 29683 | 30450 | gene=IY08_12910 | protein=hypothetical protein                    | protein_id=KGT43588.1 |
| gene | 2446910 | 2447326 | 30590 | 31006 | gene=IY08_12915 | protein=membrane protein                        | protein_id=KGT43589.1 |

|      |         |         |       |       |                 |                                               |                       |
|------|---------|---------|-------|-------|-----------------|-----------------------------------------------|-----------------------|
| gene | 2447447 | 2447650 | 31127 | 31330 | gene=IY08_12920 | protein=hypothetical protein                  | protein_id=KGT43590.1 |
| gene | 2447979 | 2448191 | 31659 | 31871 | gene=IY08_12925 | protein=membrane protein                      | protein_id=KGT43591.1 |
| gene | 2448400 | 2449404 | 32080 | 33084 | gene=IY08_12930 | protein=hypothetical protein                  | protein_id=KGT43592.1 |
| gene | 2449550 | 2449954 | 33230 | 33634 | gene=IY08_12935 | protein=hypothetical protein                  | protein_id=KGT43593.1 |
| gene | 2450115 | 2451350 | 33795 | 35030 | gene=IY08_12940 | protein=cytochrome P450                       | protein_id=KGT43594.1 |
| gene | 2451618 | 2452901 | 35298 | 36581 | gene=IY08_12945 | protein=MFS transporter                       | protein_id=KGT43595.1 |
| gene | 2452891 | 2453523 | 36571 | 37203 | gene=IY08_12950 | protein=acetyltransferase                     | protein_id=KGT43596.1 |
| gene | 2453594 | 2453749 | 37274 | 37429 | gene=IY08_12955 | protein=hypothetical protein                  | protein_id=KGT43597.1 |
| gene | 2453852 | 2454349 | 37532 | 38029 | gene=IY08_12960 | protein=PadR family transcriptional regulator | protein_id=KGT43598.1 |
| gene | 2454490 | 2455704 | 38170 | 39384 | gene=IY08_12965 | protein=cytochrome P450                       | protein_id=KGT43599.1 |
| gene | 2455813 | 2456391 | 39493 | 40071 | gene=IY08_12970 | protein=cysteine dioxygenase                  | protein_id=KGT43600.1 |
| gene | 2456567 | 2457418 | 40247 | 41098 | gene=IY08_12975 | protein=HAD family hydrolase                  | protein_id=KGT43601.1 |
| gene | 2457870 | 2459657 | 41550 | 43337 | gene=IY08_12980 | protein=histidine kinase                      | protein_id=KGT43602.1 |
| gene | 2459892 | 2462018 | 43572 | 45698 | gene=IY08_12985 | protein=penicillin-binding protein            | protein_id=KGT43603.1 |
| gene | 2462095 | 2462625 | 45775 | 46305 | gene=IY08_12990 | protein=signal peptidase                      | protein_id=KGT43604.1 |
| gene | 2462885 | 2464072 | 46565 | 47752 | gene=IY08_12995 | protein=UDP-glucosyltransferase               | protein_id=KGT43605.1 |
| gene | 2464167 | 2464847 | 47847 | 48527 | gene=IY08_13000 | protein=aspartate racemase                    | protein_id=KGT43606.1 |
| gene | 2465258 | 2465806 | 48938 | 49486 | gene=IY08_13005 | protein=hypothetical protein                  | protein_id=KGT43607.1 |
| gene | 2465817 | 2467517 | 49497 | 51197 | gene=IY08_13010 | protein=ABC transporter ATP-binding protein   | protein_id=KGT43608.1 |
| gene | 2467510 | 2468310 | 51190 | 51990 | gene=IY08_13015 | protein=cobalamin biosynthesis protein CbiQ   | protein_id=KGT43609.1 |
| gene | 2468656 | 2469915 | 52336 | 53595 | gene=IY08_13025 | protein=histidine kinase                      | protein_id=KGT43610.1 |
| gene | 2470132 | 2470335 | 53812 | 54015 | gene=IY08_13030 | protein=transposase                           | protein_id=KGT43611.1 |
| gene | 2470770 | 2471633 | 54450 | 55313 | gene=IY08_13035 | protein=hypothetical protein                  | protein_id=KGT43612.1 |
| gene | 2472058 | 2474172 | 55738 | 57852 | gene=IY08_13040 | protein=40-residue YVTN family beta-propeller | protein_id=KGT43613.1 |
| gene | 2474739 | 2475203 | 58419 | 58883 | gene=IY08_13045 | protein=hypothetical protein                  | protein_id=KGT43614.1 |
| gene | 2476338 | 2477066 | 60018 | 60746 | gene=IY08_13050 | protein=hypothetical protein                  | protein_id=KGT43615.1 |
| gene | 2477417 | 2477883 | 61097 | 61563 | pseudo          |                                               |                       |
| gene | 2479932 | 2481731 | 63612 | 65411 | gene=IY08_13060 | protein=reverse transcriptase                 | protein_id=KGT43616.1 |
| gene | 2482159 | 2482329 | 65839 | 66009 | pseudo          |                                               |                       |
| gene | 2483713 | 2484594 | 67393 | 68274 | gene=IY08_13085 | protein=serine/threonine protein kinase       | protein_id=KGT43617.1 |
| gene | 2484722 | 2485228 | 68402 | 68908 | gene=IY08_13090 | protein=glutamate-rich protein GrpB           | protein_id=KGT43618.1 |

|      |         |         |       |       |                 |                                                 |                       |
|------|---------|---------|-------|-------|-----------------|-------------------------------------------------|-----------------------|
| gene | 2485400 | 2486389 | 69080 | 70069 | gene=IY08_13095 | protein=alcohol dehydrogenase                   | protein_id=KGT43619.1 |
| gene | 2486637 | 2487236 | 70317 | 70916 | gene=IY08_13100 | protein=phosphoesterase                         | protein_id=KGT43620.1 |
| gene | 2487526 | 2489664 | 71206 | 73344 | gene=IY08_13105 | protein=dihydropteridine reductase              | protein_id=KGT43621.1 |
| gene | 2489854 | 2490450 | 73534 | 74130 | gene=IY08_13110 | protein=TetR family transcriptional regulator   | protein_id=KGT43622.1 |
| gene | 2490535 | 2491356 | 74215 | 75036 | gene=IY08_13115 | protein=oxidoreductase                          | protein_id=KGT43623.1 |
| gene | 2491736 | 2492968 | 75416 | 76648 | gene=IY08_13120 | protein=permease                                | protein_id=KGT43624.1 |
| gene | 2493231 | 2494256 | 76911 | 77936 | gene=IY08_13125 | protein=penicillin-binding protein              | protein_id=KGT43625.1 |
| gene | 2494933 | 2495388 | 78613 | 79068 | gene=IY08_13135 | protein=membrane protein                        | protein_id=KGT43626.1 |
| gene | 2495468 | 2495974 | 79148 | 79654 | gene=IY08_13140 | protein=ABC transporter                         | protein_id=KGT43627.1 |
| gene | 2496174 | 2496980 | 79854 | 80660 | gene=IY08_13145 | protein=alanine aminotransferase                | protein_id=KGT43628.1 |
| gene | 2497227 | 2497721 | 80907 | 81401 | gene=IY08_13150 | protein=XRE family transcriptional regulator    | protein_id=KGT43629.1 |
| gene | 2497735 | 2498109 | 81415 | 81789 | gene=IY08_13155 | protein=ammonia permease                        | protein_id=KGT43630.1 |
| gene | 2498670 | 2499095 | 82350 | 82775 | gene=IY08_13160 | protein=hypothetical protein                    | protein_id=KGT43631.1 |
| gene | 2499613 | 2500836 | 83293 | 84516 | gene=IY08_13165 | protein=methyltransferase                       | protein_id=KGT43632.1 |
| gene | 2500949 | 2502244 | 84629 | 85924 | gene=IY08_13170 | protein=permease                                | protein_id=KGT43633.1 |
| gene | 2502508 | 2503305 | 86188 | 86985 | gene=IY08_13175 | protein=MerR family transcriptional regulator   | protein_id=KGT43634.1 |
| gene | 2503328 | 2503972 | 87008 | 87652 | gene=IY08_13180 | protein=membrane protein                        | protein_id=KGT43635.1 |
| gene | 2504022 | 2504723 | 87702 | 88403 | gene=IY08_13185 | protein=hypothetical protein                    | protein_id=KGT43636.1 |
| gene | 2505234 | 2506034 | 88914 | 89714 | gene=IY08_13195 | protein=acetyltransferase                       | protein_id=KGT43637.1 |
| gene | 2506080 | 2506958 | 89760 | 90638 | gene=IY08_13200 | protein=glycerophosphodiester phosphodiesterase | protein_id=KGT43638.1 |
| gene | 2507245 | 2508090 | 90925 | 91770 | gene=IY08_13205 | protein=peptidase M15                           | protein_id=KGT43639.1 |
| gene | 2508224 | 2508685 | 91904 | 92365 | gene=IY08_13210 | protein=alcohol dehydrogenase                   | protein_id=KGT43640.1 |
| gene | 2508860 | 2509390 | 92540 | 93070 | gene=IY08_13215 | protein=alpha/beta hydrolase                    | protein_id=KGT43641.1 |
| gene | 2509436 | 2510869 | 93116 | 94549 | gene=IY08_13220 | protein=GntR family transcriptional regulator   | protein_id=KGT43642.1 |
| gene | 2511022 | 2511405 | 94702 | 95085 | gene=IY08_13225 | protein=membrane protein                        | protein_id=KGT43643.1 |
| gene | 2511432 | 2511956 | 95112 | 95636 | gene=IY08_13230 | protein=membrane protein                        | protein_id=KGT43478.1 |
| gene | 2512095 | 2513456 | 95775 | 97136 | gene=IY08_13235 | protein=chitosanase                             | protein_id=KGT43479.1 |
| gene | 2513619 | 2514542 | 97299 | 98222 | gene=IY08_13240 | protein=nucleoside hydrolase                    | protein_id=KGT43480.1 |
| gene | 2514619 | 2515077 | 98299 | 98757 | gene=IY08_13245 | protein=GCN5 family acetyltransferase           | protein_id=KGT43481.1 |
| gene | 2515107 | 2515454 | 98787 | 99134 | gene=IY08_13250 | protein=cytochrome C biogenesis protein         | protein_id=KGT43482.1 |
| gene | 2515471 | 2515917 | 99151 | 99597 | gene=IY08_13255 | protein=DNA mismatch repair protein MutT        | protein_id=KGT43483.1 |



|      |         |         |        |        |                 |                                          |                       |
|------|---------|---------|--------|--------|-----------------|------------------------------------------|-----------------------|
| gene | 2516117 | 2516365 | 99797  | 100045 | gene=IY08_13260 | protein=sporulation protein              | protein_id=KGT43484.1 |
| gene | 2516466 | 2517482 | 100146 | 101162 | gene=IY08_13265 | protein=penicillin-binding protein       | protein_id=KGT43485.1 |
| gene | 2517514 | 2517657 | 101194 | 101337 | gene=IY08_13270 | protein=Spore cortex-lytic enzyme        | protein_id=KGT43486.1 |
| gene | 2517937 | 2519145 | 101617 | 102825 | gene=IY08_13275 | protein=membrane protein                 | protein_id=KGT43487.1 |
| gene | 2519276 | 2519701 | 102956 | 103381 | gene=IY08_13280 | protein=acetyltransferase                | protein_id=KGT43488.1 |
| gene | 2519910 | 2520353 | 103590 | 104033 | gene=IY08_13285 | protein=DNA mismatch repair protein MutT | protein_id=KGT43489.1 |
| gene | 2520384 | 2521514 | 104064 | 105194 | gene=IY08_13290 | protein=DNA polymerase III subunit beta  | protein_id=KGT43490.1 |
| gene | 2521734 | 2522657 | 105414 | 106337 | gene=IY08_13295 | protein=hypothetical protein             | protein_id=KGT43491.1 |
| gene | 2522721 | 2523683 | 106401 | 107363 | gene=IY08_13300 | protein=membrane protein                 | protein_id=KGT43492.1 |
| gene | 2523980 | 2524957 | 107660 | 108637 | gene=IY08_13305 | protein=endonuclease                     | protein_id=KGT43493.1 |
| gene | 2525574 | 2525969 | 109254 | 109649 | gene=IY08_13315 | protein=endoribonuclease L-PSP           | protein_id=KGT43494.1 |
| gene | 2526677 | 2527492 | 110357 | 111172 | gene=IY08_13320 | protein=cytoplasmic protein              | protein_id=KGT43495.1 |
| gene | 2527571 | 2527978 | 111251 | 111658 | gene=IY08_13325 | protein=enterochelin esterase            | protein_id=KGT43496.1 |
| gene | 2528070 | 2529128 | 111750 | 112808 | gene=IY08_13330 | protein=esterase                         | protein_id=KGT43497.1 |
| gene | 2529218 | 2529583 | 112898 | 113263 | gene=IY08_13335 | protein=hypothetical protein             | protein_id=KGT43498.1 |
| gene | 2529865 | 2530236 | 113545 | 113916 | gene=IY08_13340 | protein=hypothetical protein             | protein_id=KGT43499.1 |
| gene | 2530249 | 2531100 | 113929 | 114780 | gene=IY08_13345 | protein=patatin                          | protein_id=KGT43500.1 |
| gene | 2531280 | 2531657 | 114960 | 115337 | gene=IY08_13350 | protein=cytoplasmic protein              | protein_id=KGT43501.1 |
| gene | 2531778 | 2532251 | 115458 | 115931 | gene=IY08_13355 | protein=acetyltransferase                | protein_id=KGT43502.1 |
| gene | 2532253 | 2532774 | 115933 | 116454 | gene=IY08_13360 | protein=metal-dependent hydrolase        | protein_id=KGT43503.1 |
| gene | 2532791 | 2533318 | 116471 | 116998 | gene=IY08_13365 | protein=acetyltransferase                | protein_id=KGT43504.1 |
| gene | 2533382 | 2534704 | 117062 | 118384 | gene=IY08_13370 | protein=glutamate synthase               | protein_id=KGT43505.1 |
| gene | 2534787 | 2535566 | 118467 | 119246 | gene=IY08_13375 | protein=UDP pyrophosphate phosphatase    | protein_id=KGT43506.1 |
| gene | 2535699 | 2535905 | 119379 | 119585 | gene=IY08_13380 | protein=hypothetical protein             | protein_id=KGT43507.1 |
| gene | 2535963 | 2536343 | 119643 | 120023 | gene=IY08_13385 | protein=hypothetical protein             | protein_id=KGT43508.1 |
| gene | 2536421 | 2536984 | 120101 | 120664 | gene=IY08_13390 | protein=GNAT family acetyltransferase    | protein_id=KGT43509.1 |
| gene | 2537017 | 2537589 | 120697 | 121269 | gene=IY08_13395 | protein=membrane protein                 | protein_id=KGT43510.1 |
| gene | 2537793 | 2539223 | 121473 | 122903 | gene=IY08_13400 | protein=glucose dehydrogenase            | protein_id=KGT43511.1 |
| gene | 2539360 | 2539617 | 123040 | 123297 | gene=IY08_13405 | protein=hypothetical protein             | protein_id=KGT43512.1 |
| gene | 2539709 | 2539888 | 123389 | 123568 | gene=IY08_13410 | protein=hypothetical protein             | protein_id=KGT43513.1 |
| gene | 2540082 | 2540741 | 123762 | 124421 | gene=IY08_13415 | protein=serine/threonine protein kinase  | protein_id=KGT43514.1 |

|      |         |         |        |        |                 |                                                           |                       |
|------|---------|---------|--------|--------|-----------------|-----------------------------------------------------------|-----------------------|
| gene | 2540934 | 2541374 | 124614 | 125054 | gene=IY08_13420 | protein=cytochrome C biogenesis protein CcdA              | protein_id=KGT43515.1 |
| gene | 2541591 | 2542706 | 125271 | 126386 | gene=IY08_13425 | protein=oxidoreductase                                    | protein_id=KGT43516.1 |
| gene | 2542833 | 2543486 | 126513 | 127166 | gene=IY08_13430 | protein=hypothetical protein                              | protein_id=KGT43517.1 |
| gene | 2543831 | 2544598 | 127511 | 128278 | gene=IY08_13440 | protein=acetyltransferase                                 | protein_id=KGT43518.1 |
| gene | 2544789 | 2545292 | 128469 | 128972 | gene=IY08_13445 | protein=MepB                                              | protein_id=KGT43519.1 |
| gene | 2545401 | 2545769 | 129081 | 129449 | gene=IY08_13450 | protein=cytoplasmic protein                               | protein_id=KGT43520.1 |
| gene | 2545975 | 2546667 | 129655 | 130347 | gene=IY08_13455 | protein=2-haloalkanoic acid dehalogenase                  | protein_id=KGT43521.1 |
| gene | 2547114 | 2547779 | 130794 | 131459 | gene=IY08_13460 | protein=transcriptional regulator                         | protein_id=KGT43522.1 |
| gene | 2547772 | 2549244 | 131452 | 132924 | gene=IY08_13465 | protein=histidine kinase                                  | protein_id=KGT43523.1 |
| gene | 2549573 | 2550109 | 133253 | 133789 | gene=IY08_13470 | protein=damage-inducible protein DinB                     | protein_id=KGT43524.1 |
| gene | 2550311 | 2550493 | 133991 | 134173 | gene=IY08_13475 | protein=hypothetical protein                              | protein_id=KGT43525.1 |
| gene | 2550786 | 2551463 | 134466 | 135143 | gene=IY08_13480 | protein=ABC transporter                                   | protein_id=KGT43526.1 |
| gene | 2551475 | 2552905 | 135155 | 136585 | gene=IY08_13485 | protein=permease                                          | protein_id=KGT43527.1 |
| gene | 2553460 | 2554461 | 137140 | 138141 | gene=IY08_13490 | protein=hypothetical protein                              | protein_id=KGT43528.1 |
| gene | 2555093 | 2556049 | 138773 | 139729 | gene=IY08_13495 | protein=lipase                                            | protein_id=KGT43529.1 |
| gene | 2556161 | 2557615 | 139841 | 141295 | gene=IY08_13500 | protein=2,4-diaminobutyrate decarboxylase                 | protein_id=KGT43530.1 |
| gene | 2557671 | 2564687 | 141351 | 148367 | gene=IY08_13505 | protein=AMP-binding protein                               | protein_id=KGT43531.1 |
| gene | 2564720 | 2565697 | 148400 | 149377 | gene=IY08_13510 | protein=dehydrogenase                                     | protein_id=KGT43532.1 |
| gene | 2566569 | 2569127 | 150249 | 152807 | gene=IY08_13515 | protein=pullulanase                                       | protein_id=KGT43533.1 |
| gene | 2569604 | 2571307 | 153284 | 154987 | gene=IY08_13520 | protein=bacillolysin                                      | protein_id=KGT43534.1 |
| gene | 2571648 | 2573600 | 155328 | 157280 | gene=IY08_13525 | protein=2', 3'-cyclic nucleotide 2'-phosphodiesterase     | protein_id=KGT43535.1 |
| gene | 2574137 | 2574652 | 157817 | 158332 | gene=IY08_13530 | protein=PadR family transcriptional regulator             | protein_id=KGT43536.1 |
| gene | 2574781 | 2575257 | 158461 | 158937 | gene=IY08_13535 | protein=AraC family transcriptional regulator             | protein_id=KGT43537.1 |
| gene | 2575812 | 2577116 | 159492 | 160796 | gene=IY08_13540 | protein=preprotein translocase subunit SecY               | protein_id=KGT43538.1 |
| gene | 2577202 | 2578119 | 160882 | 161799 | gene=IY08_13545 | protein=transporter                                       | protein_id=KGT43539.1 |
| gene | 2578268 | 2579701 | 161948 | 163381 | gene=IY08_13550 | protein=GntR family transcriptional regulator             | protein_id=KGT43540.1 |
| gene | 2579769 | 2579870 | 163449 | 163550 | gene=IY08_13555 | protein=oxidoreductase                                    | protein_id=KGT43541.1 |
| gene | 2580187 | 2581041 | 163867 | 164721 | gene=IY08_13560 | protein=acetyltransferase                                 | protein_id=KGT43542.1 |
| gene | 2581156 | 2581491 | 164836 | 165171 | gene=IY08_13565 | protein=hypothetical protein                              | protein_id=KGT43543.1 |
| gene | 2581503 | 2582672 | 165183 | 166352 | gene=IY08_13570 | protein=peptide ABC transporter substrate-binding protein | protein_id=KGT43544.1 |
| gene | 2582882 | 2583286 | 166562 | 166966 | gene=IY08_13575 | protein=hypothetical protein                              | protein_id=KGT43545.1 |

|      |         |         |        |        |                 |                                               |                        |
|------|---------|---------|--------|--------|-----------------|-----------------------------------------------|------------------------|
| gene | 2583331 | 2583867 | 167011 | 167547 | gene=IY08_13580 | protein=cytoplasmic protein                   | protein_id=KGT43546.1  |
| gene | 2583897 | 2584163 | 167577 | 167843 | gene=IY08_13585 | protein=membrane protein                      | protein_id=KGT43547.1  |
| gene | 2584268 | 2584765 | 167948 | 168445 | gene=IY08_13590 | protein=acetyltransferase                     | protein_id=KGT43548.1  |
| gene | 2584792 | 2585148 | 168472 | 168828 | gene=IY08_13595 | protein=hypothetical protein                  | protein_id=KGT43549.1  |
| gene | 2585255 | 2585851 | 168935 | 169531 | gene=IY08_13600 | protein=hypothetical protein                  | protein_id=KGT43550.1  |
| gene | 2585878 | 2587218 | 169558 | 170898 | gene=IY08_13605 | protein=sporulation protein                   | protein_id=KGT43551.1  |
| gene | 2587234 | 2588013 | 170914 | 171693 | gene=IY08_13610 | protein=hydrolase                             | protein_id=KGT43552.1  |
| gene | 2588159 | 2588491 | 171839 | 172171 | gene=IY08_13615 | protein=hypothetical protein                  | protein_id=KGT43553.1  |
| gene | 2588638 | 2589261 | 172318 | 172941 | gene=IY08_13620 | protein=membrane protein                      | protein_id=KGT43554.1  |
| gene | 2589278 | 2590202 | 172958 | 173882 | gene=IY08_13625 | protein=6-aminohexanoate hydrolase            | protein_id=KGT43555.1] |
| gene | 2590340 | 2591179 | 174020 | 174859 | gene=IY08_13630 | protein=tryptophan 2,3-dioxygenase            | protein_id=KGT43444.1  |
| gene | 2591212 | 2591841 | 174892 | 175521 | gene=IY08_13635 | protein=kynurenine formamidase                | protein_id=KGT43445.1  |
| gene | 2591844 | 2593130 | 175524 | 176810 | gene=IY08_13640 | protein=kynureninase                          | protein_id=KGT43446.1  |
| gene | 2593290 | 2593901 | 176970 | 177581 | gene=IY08_13645 | protein=TetR family transcriptional regulator | protein_id=KGT43447.1  |
| gene | 2593937 | 2594374 | 177617 | 178054 | gene=IY08_13650 | protein=NUDIX hydrolase                       | protein_id=KGT43448.1  |
| gene | 2594471 | 2595274 | 178151 | 178954 | pseudo          |                                               |                        |
| gene | 2595302 | 2595760 | 178982 | 179440 | gene=IY08_13660 | protein=3-isopropylmalate dehydrogenase       | protein_id=KGT43449.1  |
| gene | 2595910 | 2596149 | 179590 | 179829 | gene=IY08_13665 | protein=hypothetical protein                  | protein_id=KGT43450.1  |
| gene | 2596286 | 2596543 | 179966 | 180223 | gene=IY08_13670 | protein=hypothetical protein                  | protein_id=KGT43451.1  |
| gene | 2596656 | 2598506 | 180336 | 182186 | gene=IY08_13675 | protein=acetoin dehydrogenase                 | protein_id=KGT43452.1  |
| gene | 2598629 | 2598796 | 182309 | 182476 | gene=IY08_13680 | protein=membrane protein                      | protein_id=KGT43453.1  |
| gene | 2598820 | 2599158 | 182500 | 182838 | gene=IY08_13685 | protein=cytoplasmic protein                   | protein_id=KGT43454.1  |
| gene | 2599131 | 2599727 | 182811 | 183407 | gene=IY08_13690 | protein=GNAT family acetyltransferase         | protein_id=KGT43455.1  |
| gene | 2599724 | 2600509 | 183404 | 184189 | gene=IY08_13695 | protein=cytochrome C                          | protein_id=KGT43456.1  |
| gene | 2600760 | 2601257 | 184440 | 184937 | gene=IY08_13700 | protein=lipoprotein                           | protein_id=KGT43457.1  |
| gene | 2601323 | 2601922 | 185003 | 185602 | gene=IY08_13705 | protein=methyltransferase                     | protein_id=KGT43458.1  |
| gene | 2602012 | 2602413 | 185692 | 186093 | gene=IY08_13710 | protein=Rrf2 family transcriptional regulator | protein_id=KGT43459.1  |
| gene | 2602499 | 2603089 | 186179 | 186769 | gene=IY08_13715 | protein=hypothetical protein                  | protein_id=KGT43460.1  |
| gene | 2603344 | 2603937 | 187024 | 187617 | gene=IY08_13720 | protein=hypothetical protein                  | protein_id=KGT43461.1  |
| gene | 2604023 | 2605402 | 187703 | 189082 | gene=acoL       | protein=dihydrolipoamide dehydrogenase        | protein_id=KGT43462.1  |

|      |         |         |        |        |                 |                                                                           |                        |
|------|---------|---------|--------|--------|-----------------|---------------------------------------------------------------------------|------------------------|
| gene | 2605418 | 2606617 | 189098 | 190297 | gene=IY08_13730 | protein=branched-chain alpha-keto acid dehydrogenase subunit E2           | protein_id=KGT43463.1  |
| gene | 2606645 | 2607679 | 190325 | 191359 | gene=IY08_13735 | protein=pyruvate dehydrogenase                                            | protein_id=KGT43464.1  |
| gene | 2607697 | 2608695 | 191377 | 192375 | gene=IY08_13740 | protein=acetoin:2,6-dichlorophenolindophenol oxidoreductase subunit alpha | protein_id=KGT43465.1  |
| gene | 2608865 | 2609344 | 192545 | 193024 | gene=IY08_13750 | protein=DltD domain-containing protein                                    | protein_id=KGT43466.1  |
| gene | 2609510 | 2610355 | 193190 | 194035 | gene=IY08_13755 | protein=short-chain dehydrogenase                                         | protein_id=KGT43467.1  |
| gene | 2610396 | 2610905 | 194076 | 194585 | gene=IY08_13760 | protein=glutamate-rich protein grpB                                       | protein_id=KGT43468.1  |
| gene | 2610960 | 2611397 | 194640 | 195077 | gene=IY08_13765 | protein=DNA mismatch repair protein MutT                                  | protein_id=KGT43469.1  |
| gene | 2611426 | 2611737 | 195106 | 195417 | gene=IY08_13770 | protein=capsular biosynthesis protein CpsH                                | protein_id=KGT43470.1  |
| gene | 2611818 | 2612594 | 195498 | 196274 | gene=IY08_13775 | protein=protein phosphatase                                               | protein_id=KGT43471.1  |
| gene | 2612626 | 2613111 | 196306 | 196791 | gene=IY08_13780 | protein=HIT family hydrolase                                              | protein_id=KGT43472.1  |
| gene | 2613218 | 2613385 | 196898 | 197065 | gene=IY08_13785 | protein=septum formation initiator                                        | protein_id=KGT43473.1  |
| gene | 2613603 | 2613839 | 197283 | 197519 | gene=IY08_13790 | protein=hypothetical protein                                              | protein_id=KGT43474.1  |
| gene | 2613893 | 2614729 | 197573 | 198409 | gene=IY08_13795 | protein=glycine/betaine ABC transporter                                   | protein_id=KGT43475.1  |
| gene | 2614722 | 2615927 | 198402 | 199607 | gene=IY08_13800 | protein=glycine/betaine ABC transporter ATP-binding                       | protein_id=KGT43476.1  |
| gene | 2616099 | 2616583 | 199779 | 200263 | gene=IY08_13805 | protein=glycine/betaine ABC transporter                                   | protein_id=KGT43477.1  |
| gene | 2616668 | 2616969 | 200348 | 200649 | gene=IY08_13810 | protein=glycine/betaine ABC transporter                                   | protein_id=KGT43267.1] |
| gene | 2617016 | 2617597 | 200696 | 201277 | gene=IY08_13815 | protein=Clp protease                                                      | protein_id=KGT43268.1  |
| gene | 2617619 | 2618305 | 201299 | 201985 | gene=IY08_13820 | protein=RNA polymerase factor sigma-70                                    | protein_id=KGT43269.1  |
| gene | 2618448 | 2618768 | 202128 | 202448 | gene=IY08_13825 | protein=peptide ABC transporter substrate-binding protein                 | protein_id=KGT43270.1  |
| gene | 2618773 | 2619435 | 202453 | 203115 | gene=IY08_13830 | protein=ribose 5-phosphate isomerase                                      | protein_id=KGT43271.1  |
| gene | 2619550 | 2619984 | 203230 | 203664 | gene=IY08_13835 | protein=hypothetical protein                                              | protein_id=KGT43272.1  |
| gene | 2620111 | 2621478 | 203791 | 205158 | gene=IY08_13840 | protein=chitin-binding protein                                            | protein_id=KGT43273.1  |
| gene | 2621932 | 2623125 | 205612 | 206805 | gene=IY08_13845 | protein=glycosyl transferase family 1                                     | protein_id=KGT43274.1  |
| gene | 2623217 | 2623897 | 206897 | 207577 | gene=IY08_13850 | protein=cytoplasmic protein                                               | protein_id=KGT43275.1  |
| gene | 2624059 | 2624562 | 207739 | 208242 | gene=IY08_13855 | protein=topology modulation protein                                       | protein_id=KGT43276.1  |
| gene | 2624559 | 2625488 | 208239 | 209168 | gene=IY08_13860 | protein=aminoglycoside phosphotransferase                                 | protein_id=KGT43277.1  |
| gene | 2625513 | 2625899 | 209193 | 209579 | gene=IY08_13865 | protein=membrane protein                                                  | protein_id=KGT43278.1  |
| gene | 2625965 | 2626672 | 209645 | 210352 | gene=IY08_13870 | protein=ubiquinone biosynthesis methyltransferase UbiE                    | protein_id=KGT43279.1  |
| gene | 2626694 | 2627047 | 210374 | 210727 | gene=IY08_13875 | protein=cytoplasmic protein                                               | protein_id=KGT43280.1  |

|      |         |         |        |        |                 |                                                      |                       |
|------|---------|---------|--------|--------|-----------------|------------------------------------------------------|-----------------------|
| gene | 2627063 | 2627467 | 210743 | 211147 | gene=IY08_13880 | protein=acetyltransferase                            | protein_id=KGT43281.1 |
| gene | 2627503 | 2627919 | 211183 | 211599 | gene=IY08_13885 | protein=acetyltransferase                            | protein_id=KGT43282.1 |
| gene | 2627948 | 2628319 | 211628 | 211999 | gene=IY08_13890 | protein=hypothetical protein                         | protein_id=KGT43283.1 |
| gene | 2628316 | 2629092 | 211996 | 212772 | gene=IY08_13895 | protein=membrane protein                             | protein_id=KGT43284.1 |
| gene | 2629219 | 2629731 | 212899 | 213411 | gene=IY08_13900 | protein=phosphinothricin acetyltransferase           | protein_id=KGT43285.1 |
| gene | 2629812 | 2630813 | 213492 | 214493 | gene=IY08_13905 | protein=membrane protein                             | protein_id=KGT43286.1 |
| gene | 2630800 | 2631144 | 214480 | 214824 | gene=IY08_13910 | protein=PadR family transcriptional regulator        | protein_id=KGT43287.1 |
| gene | 2632022 | 2632750 | 215702 | 216430 | gene=IY08_13925 | protein=hypothetical protein                         | protein_id=KGT43288.1 |
| gene | 2632867 | 2634942 | 216547 | 218622 | gene=IY08_13930 | protein=helicase UvrD                                | protein_id=KGT43289.1 |
| gene | 2635164 | 2635576 | 218844 | 219256 | pseudo          |                                                      |                       |
| gene | 2635631 | 2636011 | 219311 | 219691 | gene=IY08_13940 | protein=branched-chain alpha-keto acid dehydrogenase | protein_id=KGT43290.1 |
| gene | 2636037 | 2638154 | 219717 | 221834 | gene=IY08_13945 | protein=ATP-dependent DNA helicase                   | protein_id=KGT43291.1 |
| gene | 2638430 | 2638591 | 222110 | 222271 | gene=IY08_13950 | protein=hypothetical protein                         | protein_id=KGT43292.1 |
| gene | 2639278 | 2639901 | 222958 | 223581 | gene=IY08_13955 | protein=acetylglutamate kinase                       | protein_id=KGT43293.1 |
| gene | 2640066 | 2640422 | 223746 | 224102 | gene=IY08_13960 | protein=cytoplasmic protein                          | protein_id=KGT43294.1 |
| gene | 2640558 | 2641010 | 224238 | 224690 | gene=IY08_13965 | protein=hypothetical protein                         | protein_id=KGT43295.1 |
| gene | 2641412 | 2642146 | 225092 | 225826 | gene=IY08_13975 | protein=N-acetylmuramoyl-L-alanine amidase           | protein_id=KGT43296.1 |
| gene | 2642436 | 2642885 | 226116 | 226565 | gene=IY08_13980 | protein=hypothetical protein                         | protein_id=KGT43297.1 |
| gene | 2643127 | 2643315 | 226807 | 226995 | gene=IY08_13985 | protein=hypothetical protein                         | protein_id=KGT43298.1 |
| gene | 2643634 | 2644563 | 227314 | 228243 | gene=IY08_13990 | protein=inorganic pyrophosphatase                    | protein_id=KGT43299.1 |
| gene | 2644724 | 2645389 | 228404 | 229069 | gene=IY08_13995 | protein=chitin-binding protein                       | protein_id=KGT43300.1 |
| gene | 2645636 | 2646139 | 229316 | 229819 | gene=IY08_14000 | protein=GCN5 family acetyltransferase                | protein_id=KGT43301.1 |
| gene | 2646246 | 2646887 | 229926 | 230567 | gene=IY08_14005 | protein=phosphohydrolase                             | protein_id=KGT43302.1 |
| gene | 2647145 | 2647510 | 230825 | 231190 | gene=IY08_14010 | protein=alkylhydroperoxidase                         | protein_id=KGT43303.1 |
| gene | 2647610 | 2649100 | 231290 | 232780 | gene=IY08_14015 | protein=sodium:alanine symporter                     | protein_id=KGT43304.1 |
| gene | 2649231 | 2650715 | 232911 | 234395 | gene=IY08_14020 | protein=betaine-aldehyde dehydrogenase               | protein_id=KGT43305.1 |
| gene | 2650733 | 2651629 | 234413 | 235309 | gene=IY08_14025 | protein=dihydrodipicolinate synthase                 | protein_id=KGT43306.1 |
| gene | 2651652 | 2652593 | 235332 | 236273 | gene=IY08_14030 | protein=proline racemase                             | protein_id=KGT43307.1 |
| gene | 2652590 | 2653627 | 236270 | 237307 | gene=IY08_14035 | protein=proline racemase                             | protein_id=KGT43308.1 |
| gene | 2653624 | 2654799 | 237304 | 238479 | gene=IY08_14040 | protein=glycine oxidase                              | protein_id=KGT43309.1 |
| gene | 2654980 | 2656641 | 238660 | 240321 | gene=IY08_14045 | protein=histidine kinase                             | protein_id=KGT43310.1 |

|      |         |         |        |        |                 |                                                           |                       |
|------|---------|---------|--------|--------|-----------------|-----------------------------------------------------------|-----------------------|
| gene | 2656751 | 2657023 | 240431 | 240703 | gene=IY08_14050 | protein=pyridine nucleotide-disulfide oxidoreductase      | protein_id=KGT43311.1 |
| gene | 2657020 | 2657352 | 240700 | 241032 | gene=IY08_14055 | protein=(2Fe-2S)-binding protein                          | protein_id=KGT43312.1 |
| gene | 2657349 | 2658593 | 241029 | 242273 | gene=IY08_14060 | protein=sarcosine oxidase subunit alpha                   | protein_id=KGT43313.1 |
| gene | 2658651 | 2659373 | 242331 | 243053 | gene=IY08_14065 | protein=hypothetical protein                              | protein_id=KGT43314.1 |
| gene | 2659530 | 2659838 | 243210 | 243518 | gene=IY08_14070 | protein=hypothetical protein                              | protein_id=KGT43315.1 |
| gene | 2659826 | 2660275 | 243506 | 243955 | gene=IY08_14075 | protein=hypothetical protein                              | protein_id=KGT43316.1 |
| gene | 2660534 | 2661298 | 244214 | 244978 | gene=IY08_14080 | protein=hypothetical protein                              | protein_id=KGT43317.1 |
| gene | 2661504 | 2662004 | 245184 | 245684 | gene=IY08_14085 | protein=acetyltransferase                                 | protein_id=KGT43318.1 |
| gene | 2662041 | 2663156 | 245721 | 246836 | gene=IY08_14090 | protein=metal-dependent phosphohydrolase                  | protein_id=KGT43319.1 |
| gene | 2663434 | 2664039 | 247114 | 247719 | gene=IY08_14095 | protein=membrane protein                                  | protein_id=KGT43320.1 |
| gene | 2664208 | 2664432 | 247888 | 248112 | gene=IY08_14100 | protein=hypothetical protein                              | protein_id=KGT43321.1 |
| gene | 2664473 | 2665654 | 248153 | 249334 | gene=IY08_14105 | protein=alanine transporter                               | protein_id=KGT43322.1 |
| gene | 2665923 | 2666450 | 249603 | 250130 | gene=IY08_14110 | protein=acetyltransferase                                 | protein_id=KGT43323.1 |
| gene | 2666572 | 2668194 | 250252 | 251874 | gene=IY08_14115 | protein=peptide ABC transporter substrate-binding protein | protein_id=KGT43324.1 |
| gene | 2668214 | 2669215 | 251894 | 252895 | gene=IY08_14120 | protein=peptidase P60                                     | protein_id=KGT43325.1 |
| gene | 2669256 | 2670317 | 252936 | 253997 | gene=IY08_14125 | protein=mandelate racemase                                | protein_id=KGT43326.1 |
| gene | 2670504 | 2670830 | 254184 | 254510 | gene=IY08_14130 | protein=hypothetical protein                              | protein_id=KGT43327.1 |
| gene | 2671126 | 2671482 | 254806 | 255162 | gene=IY08_14135 | protein=cell division protein DIVIC                       | protein_id=KGT43328.1 |
| gene | 2671767 | 2672693 | 255447 | 256373 | gene=IY08_14140 | protein=oxidoreductase                                    | protein_id=KGT43329.1 |
| gene | 2672713 | 2673309 | 256393 | 256989 | gene=IY08_14145 | protein=AraC family transcriptional regulator             | protein_id=KGT43330.1 |
| gene | 2673306 | 2673797 | 256986 | 257477 | gene=IY08_14150 | protein=ankyrin                                           | protein_id=KGT43331.1 |
| gene | 2674335 | 2674565 | 258015 | 258245 | gene=IY08_14155 | protein=hypothetical protein                              | protein_id=KGT43332.1 |
| gene | 2674936 | 2675199 | 258616 | 258879 | gene=IY08_14160 | protein=hypothetical protein                              | protein_id=KGT43333.1 |
| gene | 2675343 | 2675903 | 259023 | 259583 | gene=IY08_14165 | protein=shikimate kinase                                  | protein_id=KGT43334.1 |
| gene | 2676005 | 2676766 | 259685 | 260446 | gene=IY08_14170 | protein=methyltransferase                                 | protein_id=KGT43335.1 |
| gene | 2676994 | 2678733 | 260674 | 262413 | gene=IY08_14175 | protein=x-prolyl-dipeptidyl aminopeptidase                | protein_id=KGT43336.1 |
| gene | 2679055 | 2679897 | 262735 | 263577 | gene=prsA       | protein=peptidylprolyl isomerase                          | protein_id=KGT43337.1 |
| gene | 2680087 | 2681463 | 263767 | 265143 | gene=IY08_14185 | protein=histidine kinase                                  | protein_id=KGT43338.1 |
| gene | 2681456 | 2682103 | 265136 | 265783 | gene=IY08_14190 | protein=regulator                                         | protein_id=KGT43339.1 |
| gene | 2682225 | 2682641 | 265905 | 266321 | gene=IY08_14195 | protein=hypothetical protein                              | protein_id=KGT43340.1 |
| gene | 2682838 | 2683284 | 266518 | 266964 | gene=IY08_14200 | protein=GNAT family acetyltransferase                     | protein_id=KGT43341.1 |

|      |         |         |        |        |                 |                                                                                |                       |
|------|---------|---------|--------|--------|-----------------|--------------------------------------------------------------------------------|-----------------------|
| gene | 2683545 | 2684249 | 267225 | 267929 | gene=IY08_14205 | protein=alpha/beta hydrolase                                                   | protein_id=KGT43342.1 |
| gene | 2684304 | 2684963 | 267984 | 268643 | gene=IY08_14210 | protein=MTA/SAH nucleosidase                                                   | protein_id=KGT43343.1 |
| gene | 2684966 | 2685679 | 268646 | 269359 | gene=IY08_14215 | protein=5'-methylthioadenosine nucleosidase                                    | protein_id=KGT43344.1 |
| gene | 2685697 | 2686446 | 269377 | 270126 | gene=IY08_14220 | protein=acetylglucosaminyl diphospho-UDP acetyl-beta-D-mannosaminyltransferase | protein_id=KGT43345.1 |
| gene | 2686459 | 2688042 | 270139 | 271722 | gene=IY08_14225 | protein=oligoendopeptidase F                                                   | protein_id=KGT43346.1 |
| gene | 2688330 | 2689190 | 272010 | 272870 | gene=IY08_14230 | protein=DegV family EDD domain-containing protein                              | protein_id=KGT43347.1 |
| gene | 2689669 | 2690121 | 273349 | 273801 | gene=IY08_14235 | protein=spore coat protein                                                     | protein_id=KGT43348.1 |
| gene | 2690136 | 2690336 | 273816 | 274016 | gene=IY08_14240 | protein=spore coat protein                                                     | protein_id=KGT43349.1 |
| gene | 2690710 | 2691195 | 274390 | 274875 | gene=IY08_14245 | protein=spore coat protein                                                     | protein_id=KGT43350.1 |
| gene | 2691781 | 2692551 | 275461 | 276231 | gene=IY08_14250 | protein=GCN5 family acetyltransferase                                          | protein_id=KGT43351.1 |
| gene | 2692961 | 2693197 | 276641 | 276877 | gene=IY08_14265 | protein=hypothetical protein                                                   | protein_id=KGT43352.1 |
| gene | 2693450 | 2693770 | 277130 | 277450 | gene=IY08_14270 | protein=hypothetical protein                                                   | protein_id=KGT43353.1 |
| gene | 2693825 | 2695357 | 277505 | 279037 | gene=IY08_14275 | protein=major facilitator transporter                                          | protein_id=KGT43354.1 |
| gene | 2695382 | 2696089 | 279062 | 279769 | gene=IY08_14280 | protein=cytoplasmic protein                                                    | protein_id=KGT43355.1 |
| gene | 2696108 | 2696818 | 279788 | 280498 | gene=IY08_14285 | protein=cytoplasmic protein                                                    | protein_id=KGT43356.1 |
| gene | 2696832 | 2697455 | 280512 | 281135 | gene=IY08_14290 | protein=hypothetical protein                                                   | protein_id=KGT43357.1 |
| gene | 2697615 | 2699351 | 281295 | 283031 | gene=IY08_14295 | protein=peptide-binding protein                                                | protein_id=KGT43358.1 |
| gene | 2699453 | 2700667 | 283133 | 284347 | gene=IY08_14300 | protein=MFS transporter                                                        | protein_id=KGT43359.1 |
| gene | 2700838 | 2701509 | 284518 | 285189 | gene=IY08_14305 | protein=lipoprotein                                                            | protein_id=KGT43360.1 |
| gene | 2701844 | 2701990 | 285524 | 285670 | gene=IY08_14310 | protein=chorismate mutase                                                      | protein_id=KGT43361.1 |
| gene | 2702307 | 2702702 | 285987 | 286382 | gene=IY08_14315 | protein=cytosolic protein                                                      | protein_id=KGT43362.1 |
| gene | 2702780 | 2703022 | 286460 | 286702 | gene=IY08_14320 | protein=membrane protein                                                       | protein_id=KGT43363.1 |
| gene | 2703202 | 2704167 | 286882 | 287847 | gene=IY08_14325 | protein=nucleoside hydrolase                                                   | protein_id=KGT43364.1 |
| gene | 2704245 | 2704433 | 287925 | 288113 | gene=IY08_14330 | protein=hypothetical protein                                                   | protein_id=KGT43365.1 |
| gene | 2704503 | 2705288 | 288183 | 288968 | gene=IY08_14335 | protein=SAM-dependent methyltransferase                                        | protein_id=KGT43366.1 |
| gene | 2705486 | 2705854 | 289166 | 289534 | gene=IY08_14340 | protein=hypothetical protein                                                   | protein_id=KGT43367.1 |
| gene | 2706006 | 2706122 | 289686 | 289802 | gene=IY08_14345 | protein=cell wall assembly protein                                             | protein_id=KGT43368.1 |
| gene | 2706653 | 2707087 | 290333 | 290767 | gene=IY08_14355 | protein=exosporium protein C                                                   | protein_id=KGT43369.1 |
| gene | 2707382 | 2708584 | 291062 | 292264 | gene=IY08_14360 | protein=macrolide transporter                                                  | protein_id=KGT43370.1 |
| gene | 2708738 | 2709037 | 292418 | 292717 | gene=IY08_14365 | protein=hypothetical protein                                                   | protein_id=KGT43371.1 |

|      |         |         |        |        |                 |                                                       |                       |
|------|---------|---------|--------|--------|-----------------|-------------------------------------------------------|-----------------------|
| gene | 2709207 | 2709569 | 292887 | 293249 | gene=IY08_14370 | protein=lipoprotein                                   | protein_id=KGT43372.1 |
| gene | 2709912 | 2711111 | 293592 | 294791 | gene=IY08_14375 | protein=aminotransferase                              | protein_id=KGT43373.1 |
| gene | 2711168 | 2711566 | 294848 | 295246 | gene=IY08_14380 | protein=hypothetical protein                          | protein_id=KGT43374.1 |
| gene | 2711651 | 2712472 | 295331 | 296152 | gene=IY08_14385 | protein=pantothenate kinase                           | protein_id=KGT43375.1 |
| gene | 2712487 | 2712996 | 296167 | 296676 | gene=IY08_14390 | protein=2'-5' RNA ligase                              | protein_id=KGT43376.1 |
| gene | 2713115 | 2713594 | 296795 | 297274 | gene=IY08_14395 | protein=cobalamin biosynthesis protein CbiX           | protein_id=KGT43377.1 |
| gene | 2713634 | 2714305 | 297314 | 297985 | gene=IY08_14400 | protein=ABC transporter permease                      | protein_id=KGT43378.1 |
| gene | 2714302 | 2715174 | 297982 | 298854 | gene=IY08_14405 | protein=ABC transporter ATP-binding protein           | protein_id=KGT43379.1 |
| gene | 2715171 | 2715551 | 298851 | 299231 | gene=IY08_14410 | protein=transcriptional regulator                     | protein_id=KGT43380.1 |
| gene | 2715676 | 2716164 | 299356 | 299844 | gene=IY08_14415 | protein=hypothetical protein                          | protein_id=KGT43381.1 |
| gene | 2716178 | 2716771 | 299858 | 300451 | gene=IY08_14420 | protein=hypothetical protein                          | protein_id=KGT43382.1 |
| gene | 2716950 | 2717048 | 300630 | 300728 | gene=IY08_14425 | protein=hypothetical protein                          | protein_id=KGT43383.1 |
| gene | 2717213 | 2717353 | 300893 | 301033 | gene=IY08_14430 | protein=carbohydrate kinase                           | protein_id=KGT43384.1 |
| gene | 2717381 | 2717524 | 301061 | 301204 | gene=IY08_14435 | protein=polyketide synthase                           | protein_id=KGT43385.1 |
| gene | 2717553 | 2717696 | 301233 | 301376 | gene=IY08_14440 | protein=sporulation protein                           | protein_id=KGT43386.1 |
| gene | 2717825 | 2717965 | 301505 | 301645 | gene=IY08_14445 | protein=sporulation protein                           | protein_id=KGT43387.1 |
| gene | 2718018 | 2718158 | 301698 | 301838 | gene=IY08_14450 | protein=sporulation protein                           | protein_id=KGT43388.1 |
| gene | 2718186 | 2718326 | 301866 | 302006 | gene=IY08_14455 | protein=sporulation protein                           | protein_id=KGT43389.1 |
| gene | 2718567 | 2719652 | 302247 | 303332 | gene=IY08_14460 | protein=permease                                      | protein_id=KGT43390.1 |
| gene | 2719802 | 2720623 | 303482 | 304303 | gene=IY08_14465 | protein=hypothetical protein                          | protein_id=KGT43391.1 |
| gene | 2720852 | 2720944 | 304532 | 304624 | gene=IY08_14470 | protein=hypothetical protein                          | protein_id=KGT43392.1 |
| gene | 2721140 | 2722252 | 304820 | 305932 | gene=IY08_14475 | protein=alkanesulfonate monooxygenase                 | protein_id=KGT43393.1 |
| gene | 2722329 | 2723177 | 306009 | 306857 | gene=IY08_14480 | protein=sulfonate ABC transporter permease            | protein_id=KGT43394.1 |
| gene | 2723194 | 2724180 | 306874 | 307860 | gene=IY08_14485 | protein=sulfonate ABC transporter substrate-binding   | protein_id=KGT43395.1 |
| gene | 2724198 | 2724953 | 307878 | 308633 | gene=IY08_14490 | protein=sulfonate ABC transporter ATP-binding protein | protein_id=KGT43396.1 |
| gene | 2725404 | 2725913 | 309084 | 309593 | gene=IY08_14495 | protein=hypothetical protein                          | protein_id=KGT43397.1 |
| gene | 2726119 | 2727159 | 309799 | 310839 | gene=IY08_14505 | protein=membrane protein                              | protein_id=KGT43398.1 |
| gene | 2727172 | 2727645 | 310852 | 311325 | gene=IY08_14510 | protein=TPR repeat-containing protein                 | protein_id=KGT43399.1 |
| gene | 2727787 | 2728476 | 311467 | 312156 | gene=IY08_14515 | protein=hypothetical protein                          | protein_id=KGT43400.1 |
| gene | 2728492 | 2729295 | 312172 | 312975 | gene=IY08_14520 | protein=aminoglycoside 3-N-acetyltransferase          | protein_id=KGT43401.1 |
| gene | 2729546 | 2730793 | 313226 | 314473 | gene=IY08_14525 | protein=glutathionylspermidine synthase               | protein_id=KGT43402.1 |



|      |         |         |        |        |                 |                                                       |                       |
|------|---------|---------|--------|--------|-----------------|-------------------------------------------------------|-----------------------|
| gene | 2730814 | 2731422 | 314494 | 315102 | gene=IY08_14530 | protein=lipoprotein                                   | protein_id=KGT43403.1 |
| gene | 2731535 | 2731936 | 315215 | 315616 | gene=IY08_14535 | protein=acetyltransferase                             | protein_id=KGT43404.1 |
| gene | 2731993 | 2732931 | 315673 | 316611 | gene=IY08_14540 | protein=membrane protein                              | protein_id=KGT43405.1 |
| gene | 2733334 | 2733858 | 317014 | 317538 | gene=IY08_14545 | protein=hypothetical protein                          | protein_id=KGT43406.1 |
| gene | 2733874 | 2734374 | 317554 | 318054 | gene=IY08_14550 | protein=acetyltransferase                             | protein_id=KGT43407.1 |
| gene | 2734415 | 2734951 | 318095 | 318631 | gene=IY08_14555 | protein=acetyltransferase                             | protein_id=KGT43408.1 |
| gene | 2734967 | 2735668 | 318647 | 319348 | gene=IY08_14560 | protein=nucleotidyltransferase                        | protein_id=KGT43409.1 |
| gene | 2735690 | 2736367 | 319370 | 320047 | gene=IY08_14565 | protein=DNA alkylation repair protein                 | protein_id=KGT43410.1 |
| gene | 2736517 | 2736759 | 320197 | 320439 | pseudo          |                                                       |                       |
| gene | 2736935 | 2737324 | 320615 | 321004 | gene=IY08_14575 | protein=hypothetical protein                          | protein_id=KGT43411.1 |
| gene | 2737906 | 2738733 | 321586 | 322413 | gene=IY08_14585 | protein=peptidoglycan N-acetylglucosamine deacetylase | protein_id=KGT43412.1 |
| gene | 2739115 | 2739789 | 322795 | 323469 | gene=IY08_14590 | protein=membrane protein                              | protein_id=KGT43413.1 |
| gene | 2739842 | 2741815 | 323522 | 325495 | gene=IY08_14595 | protein=glycerol phosphate lipoteichoic acid synthase | protein_id=KGT43414.1 |
| gene | 2742344 | 2743969 | 326024 | 327649 | gene=IY08_14605 | protein=ABC transporter ATP-binding protein           | protein_id=KGT43415.1 |
| gene | 2744282 | 2747398 | 327962 | 331078 | gene=IY08_14615 | protein=membrane protein                              | protein_id=KGT43416.1 |
| gene | 2747545 | 2748111 | 331225 | 331791 | gene=IY08_14620 | protein=TetR family transcriptional regulator         | protein_id=KGT43417.1 |
| gene | 2748379 | 2749539 | 332059 | 333219 | gene=IY08_14630 | protein=acetyltransferase                             | protein_id=KGT43418.1 |
| gene | 2749664 | 2750953 | 333344 | 334633 | gene=IY08_14635 | protein=3-phosphoshikimate 1-carboxyvinyltransferase  | protein_id=KGT43419.1 |
| gene | 2750971 | 2752071 | 334651 | 335751 | gene=IY08_14640 | protein=prephenate dehydrogenase                      | protein_id=KGT43420.1 |
| gene | 2752064 | 2753164 | 335744 | 336844 | gene=IY08_14645 | protein=histidinol-phosphate aminotransferase         | protein_id=KGT43421.1 |
| gene | 2753183 | 2754355 | 336863 | 338035 | gene=IY08_14650 | protein=chorismate synthase                           | protein_id=KGT43422.1 |
| gene | 2754638 | 2755714 | 338318 | 339394 | gene=IY08_14655 | protein=chorismate mutase                             | protein_id=KGT43423.1 |
| gene | 2756542 | 2760024 | 340222 | 343704 | gene=IY08_14660 | protein=reticulocyte-binding protein                  | protein_id=KGT43424.1 |
| gene | 2760206 | 2760643 | 343886 | 344323 | gene=IY08_14665 | protein=membrane protein                              | protein_id=KGT43425.1 |
| gene | 2760794 | 2761324 | 344474 | 345004 | gene=IY08_14670 | protein=isochorismatase                               | protein_id=KGT43426.1 |
| gene | 2761359 | 2761895 | 345039 | 345575 | gene=IY08_14675 | protein=2-aminoglycoside phosphotransferase           | protein_id=KGT43427.1 |
| gene | 2761908 | 2762213 | 345588 | 345893 | gene=IY08_14680 | protein=hypothetical protein                          | protein_id=KGT43428.1 |
| gene | 2762315 | 2762839 | 345995 | 346519 | gene=IY08_14685 | protein=hypothetical protein                          | protein_id=KGT43429.1 |
| gene | 2762858 | 2763532 | 346538 | 347212 | gene=IY08_14690 | protein=hypothetical protein                          | protein_id=KGT43430.1 |
| gene | 2763585 | 2764007 | 347265 | 347687 | gene=IY08_14695 | protein=1,3-beta-glucan synthase regulator            | protein_id=KGT43431.1 |
| gene | 2764325 | 2765647 | 348005 | 349327 | gene=IY08_14700 | protein=enterotoxin                                   | protein_id=KGT43432.1 |

|      |         |         |        |        |                 |                                                   |                       |
|------|---------|---------|--------|--------|-----------------|---------------------------------------------------|-----------------------|
| gene | 2765861 | 2766352 | 349541 | 350032 | gene=IY08_14705 | protein=nitroreductase                            | protein_id=KGT43433.1 |
| gene | 2766533 | 2766913 | 350213 | 350593 | gene=IY08_14710 | protein=hypothetical protein                      | protein_id=KGT43434.1 |
| gene | 2767019 | 2767260 | 350699 | 350940 | pseudo          |                                                   |                       |
| gene | 2767597 | 2768079 | 351277 | 351759 | gene=IY08_14720 | protein=hypothetical protein                      | protein_id=KGT43435.1 |
| gene | 2768221 | 2768568 | 351901 | 352248 | gene=IY08_14725 | protein=short-chain dehydrogenase                 | protein_id=KGT43436.1 |
| gene | 2768702 | 2769748 | 352382 | 353428 | gene=IY08_14730 | protein=hypothetical protein                      | protein_id=KGT43437.1 |
| gene | 2770129 | 2771631 | 353809 | 355311 | gene=IY08_14735 | protein=malate:quinone oxidoreductase             | protein_id=KGT43438.1 |
| gene | 2771679 | 2772722 | 355359 | 356402 | gene=IY08_14740 | protein=autoinducer 2-binding protein lsrB        | protein_id=KGT43439.1 |
| gene | 2772719 | 2773708 | 356399 | 357388 | gene=IY08_14745 | protein=autoinducer 2 import system permease LsrD | protein_id=KGT43440.1 |
| gene | 2773705 | 2774658 | 357385 | 358338 | gene=IY08_14750 | protein=sugar ABC transporter permease            | protein_id=KGT43441.1 |
| gene | 2774655 | 2776172 | 358335 | 359852 | gene=IY08_14755 | protein=sugar ABC transporter ATP-binding protein | protein_id=KGT43442.1 |
| gene | 2776370 | 2776800 | 360050 | 360480 | gene=IY08_14760 | protein=aminotransferase                          | protein_id=KGT43443.1 |
| gene | 2776891 | 2777313 | 360571 | 360993 | gene=IY08_14765 | protein=aminotransferase                          | protein_id=KGT43146.1 |
| gene | 2777313 | 2778875 | 360993 | 362555 | gene=IY08_14770 | protein=autoinducer kinase                        | protein_id=KGT43147.1 |
| gene | 2778901 | 2779263 | 362581 | 362943 | gene=IY08_14775 | protein=cupin                                     | protein_id=KGT43148.1 |
| gene | 2779270 | 2780052 | 362950 | 363732 | gene=IY08_14780 | protein=aldolase                                  | protein_id=KGT43149.1 |
| gene | 2780162 | 2780579 | 363842 | 364259 | pseudo          |                                                   |                       |
| gene | 2780783 | 2781487 | 364463 | 365167 | gene=IY08_14790 | protein=DNA polymerase subunit beta               | protein_id=KGT43150.1 |
| gene | 2781557 | 2781883 | 365237 | 365563 | gene=IY08_14795 | protein=antibiotic biosynthesis monooxygenase     | protein_id=KGT43151.1 |
| gene | 2781980 | 2783194 | 365660 | 366874 | gene=IY08_14800 | protein=permease                                  | protein_id=KGT43152.1 |
| gene | 2783252 | 2784295 | 366932 | 367975 | gene=IY08_14805 | protein=ArsR family transcriptional regulator     | protein_id=KGT43153.1 |
| gene | 2784599 | 2785090 | 368279 | 368770 | gene=IY08_14810 | protein=hypothetical protein                      | protein_id=KGT43154.1 |
| gene | 2785304 | 2786497 | 368984 | 370177 | gene=IY08_14815 | protein=nucleoside permease                       | protein_id=KGT43155.1 |
| gene | 2786547 | 2787794 | 370227 | 371474 | gene=IY08_14820 | protein=gamma-glutamyl phosphate reductase        | protein_id=KGT43156.1 |
| gene | 2787811 | 2788914 | 371491 | 372594 | gene=IY08_14825 | protein=gamma-glutamyl kinase                     | protein_id=KGT43157.1 |
| gene | 2789605 | 2790423 | 373285 | 374103 | gene=IY08_14830 | protein=pyrroline-5-carboxylate reductase         | protein_id=KGT43158.1 |
| gene | 2790561 | 2792201 | 374241 | 375881 | gene=IY08_14835 | protein=hypothetical protein                      | protein_id=KGT43159.1 |
| gene | 2792276 | 2793025 | 375956 | 376705 | gene=IY08_14840 | protein=IclR family transcriptional regulator     | protein_id=KGT43160.1 |
| gene | 2793293 | 2794717 | 376973 | 378397 | gene=IY08_14845 | protein=amino acid permease                       | protein_id=KGT43161.1 |
| gene | 2795015 | 2795473 | 378695 | 379153 | gene=IY08_14850 | protein=fosmidomycin resistance protein           | protein_id=KGT43162.1 |
| gene | 2795722 | 2796753 | 379402 | 380433 | gene=IY08_14855 | protein=fatty acid desaturase                     | protein_id=KGT43163.1 |

|      |         |         |        |        |                 |                                               |                       |
|------|---------|---------|--------|--------|-----------------|-----------------------------------------------|-----------------------|
| gene | 2797062 | 2799449 | 380742 | 383129 | gene=IY08_14860 | protein=peptidase M6                          | protein_id=KGT43164.1 |
| gene | 2799739 | 2800569 | 383419 | 384249 | gene=IY08_14865 | protein=vancomycin resistance protein         | protein_id=KGT43165.1 |
| gene | 2801042 | 2802715 | 384722 | 386395 | gene=IY08_14870 | protein=alkaline phosphatase                  | protein_id=KGT43166.1 |
| gene | 2803009 | 2803491 | 386689 | 387171 | gene=IY08_14875 | protein=membrane protein                      | protein_id=KGT43167.1 |
| gene | 2803502 | 2803717 | 387182 | 387397 | gene=IY08_14880 | protein=XRE family transcriptional regulator  | protein_id=KGT43168.1 |
| gene | 2803758 | 2804069 | 387438 | 387749 | gene=IY08_14885 | protein=hypothetical protein                  | protein_id=KGT43169.1 |
| gene | 2804367 | 2804945 | 388047 | 388625 | gene=IY08_14890 | protein=phosphoglycolate phosphatase          | protein_id=KGT43170.1 |
| gene | 2804969 | 2805550 | 388649 | 389230 | gene=IY08_14895 | protein=uridine kinase                        | protein_id=KGT43171.1 |
| gene | 2805550 | 2806092 | 389230 | 389772 | gene=IY08_14900 | protein=acetyltransferase                     | protein_id=KGT43172.1 |
| gene | 2806107 | 2806490 | 389787 | 390170 | gene=IY08_14905 | protein=glyoxalase                            | protein_id=KGT43173.1 |
| gene | 2806772 | 2807017 | 390452 | 390697 | gene=IY08_14915 | protein=DNA alkylation repair protein         | protein_id=KGT43174.1 |
| gene | 2807564 | 2808091 | 391244 | 391771 | gene=IY08_14920 | protein=Signal peptidase I                    | protein_id=KGT43175.1 |
| gene | 2808099 | 2808416 | 391779 | 392096 | gene=IY08_14925 | protein=PadR family transcriptional regulator | protein_id=KGT43176.1 |
| gene | 2808623 | 2809552 | 392303 | 393232 | gene=IY08_14930 | protein=magnesium chelatase                   | protein_id=KGT43177.1 |
| gene | 2809549 | 2810715 | 393229 | 394395 | gene=IY08_14935 | protein=hypothetical protein                  | protein_id=KGT43178.1 |
| gene | 2810687 | 2811796 | 394367 | 395476 | gene=IY08_14940 | protein=hypothetical protein                  | protein_id=KGT43179.1 |
| gene | 2811853 | 2813310 | 395533 | 396990 | gene=IY08_14945 | protein=MFS transporter                       | protein_id=KGT43180.1 |
| gene | 2813714 | 2813974 | 397394 | 397654 | gene=IY08_14950 | protein=hypothetical protein                  | protein_id=KGT43181.1 |
| gene | 2814062 | 2815558 | 397742 | 399238 | gene=IY08_14955 | protein=glycosyl transferase                  | protein_id=KGT43182.1 |
| gene | 2815701 | 2815943 | 399381 | 399623 | gene=IY08_14960 | protein=hypothetical protein                  | protein_id=KGT43183.1 |
| gene | 2816054 | 2816245 | 399734 | 399925 | gene=IY08_14965 | protein=hypothetical protein                  | protein_id=KGT43184.1 |
| gene | 2816502 | 2818019 | 400182 | 401699 | gene=IY08_14970 | protein=glycosyl transferase                  | protein_id=KGT43266.1 |
| gene | 2818876 | 2820393 | 402556 | 404073 | gene=IY08_14980 | protein=glycosyl transferase                  | protein_id=KGT43185.1 |
| gene | 2820616 | 2821638 | 404296 | 405318 | gene=IY08_14985 | protein=hypothetical protein                  | protein_id=KGT43186.1 |
| gene | 2821911 | 2823128 | 405591 | 406808 | gene=IY08_14990 | protein=acetylornithine aminotransferase      | protein_id=KGT43187.1 |
| gene | 2823393 | 2824772 | 407073 | 408452 | gene=IY08_14995 | protein=catalase                              | protein_id=KGT43188.1 |
| gene | 2824991 | 2827627 | 408671 | 411307 | gene=IY08_15000 | protein=collagenase                           | protein_id=KGT43189.1 |
| gene | 2828118 | 2828630 | 411798 | 412310 | gene=IY08_15005 | protein=hypothetical protein                  | protein_id=KGT43190.1 |
| gene | 2828744 | 2830498 | 412424 | 414178 | gene=IY08_15010 | protein=adenine deaminase                     | protein_id=KGT43191.1 |
| gene | 2830850 | 2832016 | 414530 | 415696 | gene=IY08_15015 | protein=D-alanyl-D-alanine carboxypeptidase   | protein_id=KGT43192.1 |
| gene | 2832275 | 2832781 | 415955 | 416461 | gene=IY08_15020 | protein=hypothetical protein                  | protein_id=KGT43193.1 |

|      |         |         |        |        |                 |                                               |                       |
|------|---------|---------|--------|--------|-----------------|-----------------------------------------------|-----------------------|
| gene | 2832964 | 2833704 | 416644 | 417384 | gene=IY08_15025 | protein=hypothetical protein                  | protein_id=KGT43194.1 |
| gene | 2833720 | 2834829 | 417400 | 418509 | gene=IY08_15030 | protein=hypothetical protein                  | protein_id=KGT43195.1 |
| gene | 2834826 | 2835758 | 418506 | 419438 | gene=IY08_15035 | protein=ATPase AAA                            | protein_id=KGT43196.1 |
| gene | 2835969 | 2836574 | 419649 | 420254 | gene=IY08_15040 | protein=hypothetical protein                  | protein_id=KGT43197.1 |
| gene | 2837004 | 2837501 | 420684 | 421181 | gene=IY08_15045 | protein=hypothetical protein                  | protein_id=KGT43198.1 |
| gene | 2837507 | 2837989 | 421187 | 421669 | gene=IY08_15050 | protein=sugar-binding protein                 | protein_id=KGT43199.1 |
| gene | 2838374 | 2839105 | 422054 | 422785 | gene=IY08_15055 | protein=hypothetical protein                  | protein_id=KGT43200.1 |
| gene | 2839123 | 2839767 | 422803 | 423447 | gene=IY08_15060 | protein=hypothetical protein                  | protein_id=KGT43201.1 |
| gene | 2840170 | 2840604 | 423850 | 424284 | gene=IY08_15065 | protein=hypothetical protein                  | protein_id=KGT43202.1 |
| gene | 2840606 | 2842329 | 424286 | 426009 | pseudo          |                                               |                       |
| gene | 2842326 | 2842688 | 426006 | 426368 | gene=IY08_15075 | protein=hypothetical protein                  | protein_id=KGT43203.1 |
| gene | 2842729 | 2843004 | 426409 | 426684 | gene=IY08_15080 | protein=creatininase                          | protein_id=KGT43204.1 |
| gene | 2843217 | 2843510 | 426897 | 427190 | gene=IY08_15085 | protein=monooxygenase                         | protein_id=KGT43205.1 |
| gene | 2843557 | 2844195 | 427237 | 427875 | gene=IY08_15090 | protein=NAD(P)H nitroreductase                | protein_id=KGT43206.1 |
| gene | 2844214 | 2844642 | 427894 | 428322 | gene=IY08_15095 | protein=MarR family transcriptional regulator | protein_id=KGT43207.1 |
| gene | 2844908 | 2846851 | 428588 | 430531 | gene=IY08_15100 | protein=tetracycline resistance protein       | protein_id=KGT43208.1 |
| gene | 2846897 | 2847541 | 430577 | 431221 | gene=IY08_15105 | protein=hypothetical protein                  | protein_id=KGT43209.1 |
| gene | 2847563 | 2848030 | 431243 | 431710 | gene=IY08_15110 | protein=DNA mismatch repair protein MutT      | protein_id=KGT43210.1 |
| gene | 2848225 | 2849016 | 431905 | 432696 | gene=IY08_15115 | protein=WGR domain family protein             | protein_id=KGT43211.1 |
| gene | 2849081 | 2849512 | 432761 | 433192 | gene=IY08_15120 | protein=cell wall assembly protein            | protein_id=KGT43212.1 |
| gene | 2849565 | 2850590 | 433245 | 434270 | gene=IY08_15125 | protein=NAD-dependent dehydratase             | protein_id=KGT43213.1 |
| gene | 2850757 | 2851427 | 434437 | 435107 | pseudo          |                                               |                       |
| gene | 2851427 | 2852689 | 435107 | 436369 | gene=IY08_15135 | protein=ABC transporter permease              | protein_id=KGT43214.1 |
| gene | 2852695 | 2853780 | 436375 | 437460 | gene=IY08_15140 | protein=ABC transporter permease              | protein_id=KGT43215.1 |
| gene | 2853846 | 2854214 | 437526 | 437894 | gene=IY08_15145 | protein=hypothetical protein                  | protein_id=KGT43216.1 |
| gene | 2854421 | 2855368 | 438101 | 439048 | gene=IY08_15150 | protein=6-aminohexanoate hydrolase            | protein_id=KGT43217.1 |
| gene | 2855393 | 2856271 | 439073 | 439951 | gene=IY08_15155 | protein=AraC family transcriptional regulator | protein_id=KGT43218.1 |
| gene | 2856438 | 2856947 | 440118 | 440627 | gene=IY08_15160 | protein=cytosine deaminase                    | protein_id=KGT43219.1 |
| gene | 2857103 | 2857573 | 440783 | 441253 | gene=IY08_15165 | protein=acetyltransferase                     | protein_id=KGT43220.1 |
| gene | 2857591 | 2857998 | 441271 | 441678 | gene=IY08_15170 | protein=hypothetical protein                  | protein_id=KGT43221.1 |
| gene | 2858093 | 2858545 | 441773 | 442225 | gene=IY08_15175 | protein=DNA mismatch repair protein MutT      | protein_id=KGT43222.1 |

|      |         |         |        |        |                 |                                               |                       |
|------|---------|---------|--------|--------|-----------------|-----------------------------------------------|-----------------------|
| gene | 2858579 | 2859490 | 442259 | 443170 | gene=IY08_15180 | protein=membrane protein                      | protein_id=KGT43223.1 |
| gene | 2859616 | 2861058 | 443296 | 444738 | gene=IY08_15185 | protein=GntR family transcriptional regulator | protein_id=KGT43224.1 |
| gene | 2861288 | 2861728 | 444968 | 445408 | gene=IY08_15190 | protein=hypothetical protein                  | protein_id=KGT43225.1 |
| gene | 2861815 | 2862129 | 445495 | 445809 | gene=IY08_15195 | protein=hypothetical protein                  | protein_id=KGT43226.1 |
| gene | 2862210 | 2863034 | 445890 | 446714 | gene=IY08_15200 | protein=membrane protein                      | protein_id=KGT43227.1 |
| gene | 2863127 | 2863588 | 446807 | 447268 | gene=IY08_15205 | protein=hypothetical protein                  | protein_id=KGT43228.1 |
| gene | 2863616 | 2864284 | 447296 | 447964 | gene=IY08_15210 | protein=uridine kinase                        | protein_id=KGT43229.1 |
| gene | 2864455 | 2865198 | 448135 | 448878 | gene=IY08_15215 | protein=serine/threonine protein phosphatase  | protein_id=KGT43230.1 |
| gene | 2865212 | 2866138 | 448892 | 449818 | gene=IY08_15220 | protein=aminoglycoside phosphotransferase     | protein_id=KGT43231.1 |
| gene | 2866153 | 2866950 | 449833 | 450630 | gene=IY08_15225 | protein=hypothetical protein                  | protein_id=KGT43232.1 |
| gene | 2867156 | 2868058 | 450836 | 451738 | gene=IY08_15230 | protein=membrane protein                      | protein_id=KGT43233.1 |
| gene | 2868096 | 2868545 | 451776 | 452225 | gene=IY08_15235 | protein=acetyltransferase                     | protein_id=KGT43234.1 |
| gene | 2869176 | 2870642 | 452856 | 454322 | gene=IY08_15240 | protein=gamma-aminobutyrate permease          | protein_id=KGT43235.1 |
| gene | 2870756 | 2871061 | 454436 | 454741 | gene=IY08_15245 | protein=Fe-S cluster assembly protein HesB    | protein_id=KGT43236.1 |
| gene | 2871095 | 2871865 | 454775 | 455545 | gene=IY08_15250 | protein=DNA alkylation repair protein         | protein_id=KGT43237.1 |
| gene | 2871975 | 2872955 | 455655 | 456635 | gene=IY08_15255 | protein=hypothetical protein                  | protein_id=KGT43238.1 |
| gene | 2873170 | 2873451 | 456850 | 457131 | gene=IY08_15260 | protein=hypothetical protein                  | protein_id=KGT43239.1 |
| gene | 2873757 | 2874518 | 457437 | 458198 | gene=IY08_15265 | protein=SAM-dependent methyltransferase       | protein_id=KGT43240.1 |
| gene | 2874699 | 2875223 | 458379 | 458903 | gene=IY08_15275 | protein=DNA mismatch repair protein MutT      | protein_id=KGT43241.1 |
| gene | 2875493 | 2876005 | 459173 | 459685 | gene=IY08_15280 | protein=cephalosporin hydroxylase             | protein_id=KGT43242.1 |
| gene | 2876040 | 2876561 | 459720 | 460241 | gene=IY08_15285 | protein=signal peptidase                      | protein_id=KGT43243.1 |
| gene | 2876643 | 2878796 | 460323 | 462476 | gene=IY08_15290 | protein=penicillin-binding protein            | protein_id=KGT43244.1 |
| gene | 2879031 | 2879759 | 462711 | 463439 | gene=IY08_15295 | protein=NAD-dependent deacetylase             | protein_id=KGT43245.1 |
| gene | 2879835 | 2880482 | 463515 | 464162 | gene=IY08_15300 | protein=pyrrolidone-carboxylate peptidase     | protein_id=KGT43246.1 |
| gene | 2880499 | 2881461 | 464179 | 465141 | gene=IY08_15305 | protein=permease                              | protein_id=KGT43247.1 |
| gene | 2881463 | 2882158 | 465143 | 465838 | gene=IY08_15310 | protein=membrane protein                      | protein_id=KGT43248.1 |
| gene | 2882181 | 2882942 | 465861 | 466622 | gene=IY08_15315 | protein=LamB/YcsF family protein              | protein_id=KGT43249.1 |
| gene | 2882955 | 2883950 | 466635 | 467630 | gene=IY08_15320 | protein=KipI antagonist                       | protein_id=KGT43250.1 |
| gene | 2883941 | 2884654 | 467621 | 468334 | gene=IY08_15325 | protein=kinase                                | protein_id=KGT43251.1 |
| gene | 2884669 | 2885421 | 468349 | 469101 | gene=IY08_15330 | protein=IclR family transcriptional regulator | protein_id=KGT43252.1 |
| gene | 2885577 | 2886128 | 469257 | 469808 | gene=IY08_15335 | protein=signal peptidase I                    | protein_id=KGT43253.1 |

|            |         |         |        |        |                 |                                                  |                       |
|------------|---------|---------|--------|--------|-----------------|--------------------------------------------------|-----------------------|
| gene       | 2886152 | 2886829 | 469832 | 470509 | gene=IY08_15340 | protein=copper homeostasis protein               | protein_id=KGT43254.1 |
| gene       | 2887028 | 2887735 | 470708 | 471415 | gene=IY08_15350 | protein=ArsR family transcriptional regulator    | protein_id=KGT43255.1 |
| gene       | 2887805 | 2888275 | 471485 | 471955 | gene=IY08_15355 | protein=hypothetical protein                     | protein_id=KGT43256.1 |
| gene       | 2888491 | 2889639 | 472171 | 473319 | gene=IY08_15360 | protein=acyl-CoA dehydrogenase                   | protein_id=KGT43257.1 |
| gene       | 2889794 | 2890426 | 473474 | 474106 | gene=IY08_15365 | protein=multidrug MFS transporter                | protein_id=KGT43258.1 |
| gene       | 2890756 | 2891343 | 474436 | 475023 | gene=IY08_15370 | protein=GNAT family acetyltransferase            | protein_id=KGT43259.1 |
| gene       | 2891733 | 2893061 | 475413 | 476741 | gene=IY08_15380 | protein=histidine transporter                    | protein_id=KGT43260.1 |
| gene       | 2893173 | 2894051 | 476853 | 477731 | gene=IY08_15385 | protein=acetyltransferase                        | protein_id=KGT43261.1 |
| gene       | 2894052 | 2894567 | 477732 | 478247 | gene=IY08_15390 | protein=acetyltransferase                        | protein_id=KGT43262.1 |
| gene       | 2894594 | 2895055 | 478274 | 478735 | gene=IY08_15395 | protein=prophage protein                         | protein_id=KGT43263.1 |
| gene       | 2895287 | 2895721 | 478967 | 479401 | gene=IY08_15400 | protein=hypothetical protein                     | protein_id=KGT43264.1 |
| gene       | 2895993 | 2896499 | 479673 | 480179 | gene=IY08_15405 | protein=acetyltransferase                        | protein_id=KGT43265.1 |
| scaffold14 |         |         |        |        |                 |                                                  |                       |
| gene       | 2898101 | 2898598 | 1241   | 1738   | gene=IY08_15425 | protein=hypothetical protein                     | protein_id=KGT43094.1 |
| gene       | 2898697 | 2899755 | 1837   | 2895   | gene=IY08_15430 | protein=histidine kinase                         | protein_id=KGT43095.1 |
| gene       | 2899752 | 2900465 | 2892   | 3605   | gene=IY08_15435 | protein=PhoP family transcriptional regulator    | protein_id=KGT43096.1 |
| gene       | 2900835 | 2903051 | 3975   | 6191   | gene=IY08_15440 | protein=hypothetical protein                     | protein_id=KGT43097.1 |
| gene       | 2903327 | 2905732 | 6467   | 8872   | gene=IY08_15445 | protein=sporulation kinase                       | protein_id=KGT43098.1 |
| gene       | 2906426 | 2907826 | 9566   | 10966  | gene=IY08_15450 | protein=hemolysin BL-binding component precursor | protein_id=KGT43099.1 |
| gene       | 2908202 | 2909329 | 11342  | 12469  | gene=IY08_15455 | protein=hemolysin                                | protein_id=KGT43100.1 |
| gene       | 2909366 | 2910586 | 12506  | 13726  | gene=IY08_15460 | protein=hemolysin BL lytic component L1          | protein_id=KGT43101.1 |
| gene       | 2910648 | 2911967 | 13788  | 15107  | gene=IY08_15465 | protein=hemolysin BL lytic component L2          | protein_id=KGT43102.1 |
| gene       | 2913620 | 2914849 | 16760  | 17989  | gene=IY08_15470 | protein=AraC family transcriptional regulator    | protein_id=KGT43103.1 |
| gene       | 2916153 | 2916383 | 19293  | 19523  | pseudo          |                                                  |                       |
| gene       | 2916550 | 2917191 | 19690  | 20331  | gene=IY08_15480 | protein=excinuclease ABC subunit C               | protein_id=KGT43104.1 |
| gene       | 2917357 | 2918772 | 20497  | 21912  | gene=IY08_15485 | protein=amino acid permease                      | protein_id=KGT43105.1 |
| gene       | 2918906 | 2919724 | 22046  | 22864  | gene=IY08_15490 | protein=pyrroline-5-carboxylate reductase        | protein_id=KGT43106.1 |
| gene       | 2920049 | 2921242 | 23189  | 24382  | gene=IY08_15495 | protein=spore germination protein GerC           | protein_id=KGT43107.1 |
| gene       | 2921239 | 2922330 | 24379  | 25470  | gene=IY08_15500 | protein=spore germination protein                | protein_id=KGT43108.1 |
| gene       | 2922357 | 2923931 | 25497  | 27071  | gene=IY08_15505 | protein=spore germination protein                | protein_id=KGT43109.1 |
| gene       | 2924583 | 2925527 | 27723  | 28667  | gene=IY08_15515 | protein=transcriptional regulator                | protein_id=KGT43110.1 |

|      |         |         |       |       |                 |                                               |                       |
|------|---------|---------|-------|-------|-----------------|-----------------------------------------------|-----------------------|
| gene | 2925532 | 2926848 | 28672 | 29988 | gene=IY08_15520 | protein=histidine kinase                      | protein_id=KGT43111.1 |
| gene | 2927082 | 2928062 | 30222 | 31202 | gene=IY08_15525 | protein=glutaminase                           | protein_id=KGT43112.1 |
| gene | 2928187 | 2929611 | 31327 | 32751 | gene=IY08_15535 | protein=sodium:alanine symporter              | protein_id=KGT43113.1 |
| gene | 2930570 | 2931721 | 33710 | 34861 | gene=IY08_15540 | protein=arsenic transporter                   | protein_id=KGT43114.1 |
| gene | 2932096 | 2933253 | 35236 | 36393 | gene=IY08_15550 | protein=D-alanyl-D-alanine carboxypeptidase   | protein_id=KGT43115.1 |
| gene | 2933839 | 2935170 | 36979 | 38310 | gene=IY08_15555 | protein=erythromycin esterase                 | protein_id=KGT43116.1 |
| gene | 2935693 | 2937282 | 38833 | 40422 | gene=IY08_15560 | protein=5'-nucleotidase                       | protein_id=KGT43117.1 |
| gene | 2937668 | 2938504 | 40808 | 41644 | gene=IY08_15565 | protein=bromoperoxidase                       | protein_id=KGT43118.1 |
| gene | 2939007 | 2939651 | 42147 | 42791 | gene=IY08_15570 | protein=hypothetical protein                  | protein_id=KGT43119.1 |
| gene | 2939962 | 2940606 | 43102 | 43746 | gene=IY08_15580 | protein=hydrolase                             | protein_id=KGT43120.1 |
| gene | 2940603 | 2941196 | 43743 | 44336 | gene=IY08_15585 | protein=hypothetical protein                  | protein_id=KGT43121.1 |
| gene | 2941210 | 2943045 | 44350 | 46185 | gene=IY08_15590 | protein=amidohydrolase                        | protein_id=KGT43122.1 |
| gene | 2943351 | 2944229 | 46491 | 47369 | gene=IY08_15595 | protein=LysR family transcriptional regulator | protein_id=KGT43123.1 |
| gene | 2944449 | 2944892 | 47589 | 48032 | gene=IY08_15600 | protein=transcriptional regulator             | protein_id=KGT43124.1 |
| gene | 2945454 | 2945825 | 48594 | 48965 | gene=IY08_15605 | protein=hypothetical protein                  | protein_id=KGT43125.1 |
| gene | 2945886 | 2946554 | 49026 | 49694 | gene=IY08_15610 | protein=hypothetical protein                  | protein_id=KGT43126.1 |
| gene | 2947076 | 2948026 | 50216 | 51166 | gene=IY08_15620 | protein=magnesium transporter                 | protein_id=KGT43127.1 |
| gene | 2948332 | 2949357 | 51472 | 52497 | gene=IY08_15625 | protein=ATP synthase F0F1 subunit alpha       | protein_id=KGT43128.1 |
| gene | 2949393 | 2949794 | 52533 | 52934 | gene=IY08_15630 | protein=peptidase U61 LD-carboxypeptidase A   | protein_id=KGT43129.1 |
| gene | 2949880 | 2950266 | 53020 | 53406 | gene=IY08_15635 | protein=general stress protein                | protein_id=KGT43130.1 |
| gene | 2950603 | 2952141 | 53743 | 55281 | gene=IY08_15640 | protein=hydrolase                             | protein_id=KGT43131.1 |
| gene | 2952715 | 2953080 | 55855 | 56220 | gene=IY08_15645 | protein=hypothetical protein                  | protein_id=KGT43132.1 |
| gene | 2953168 | 2953878 | 56308 | 57018 | gene=IY08_15650 | protein=carboxymethylenebutenolidase          | protein_id=KGT43133.1 |
| gene | 2953982 | 2954437 | 57122 | 57577 | gene=IY08_15655 | protein=membrane protein                      | protein_id=KGT43134.1 |
| gene | 2954549 | 2955979 | 57689 | 59119 | gene=IY08_15660 | protein=deoxyribodipyrimidine photolyase      | protein_id=KGT43135.1 |
| gene | 2956052 | 2956873 | 59192 | 60013 | gene=IY08_15665 | protein=NmrA family transcriptional regulator | protein_id=KGT43136.1 |
| gene | 2956879 | 2957304 | 60019 | 60444 | gene=IY08_15670 | protein=transcriptional regulator             | protein_id=KGT43137.1 |
| gene | 2957615 | 2957899 | 60755 | 61039 | gene=IY08_15675 | protein=hypothetical protein                  | protein_id=KGT43138.1 |
| gene | 2957941 | 2959401 | 61081 | 62541 | gene=IY08_15680 | protein=histidine kinase                      | protein_id=KGT43139.1 |
| gene | 2959398 | 2960084 | 62538 | 63224 | gene=IY08_15685 | protein=DeoR family transcriptional regulator | protein_id=KGT43140.1 |
| gene | 2960619 | 2961200 | 63759 | 64340 | gene=IY08_15690 | protein=PadR family transcriptional regulator | protein_id=KGT43141.1 |

|      |         |         |       |       |                 |                                                          |                       |
|------|---------|---------|-------|-------|-----------------|----------------------------------------------------------|-----------------------|
| gene | 2961277 | 2962800 | 64417 | 65940 | gene=IY08_15695 | protein=major facilitator transporter                    | protein_id=KGT43142.1 |
| gene | 2963026 | 2964243 | 66166 | 67383 | gene=IY08_15700 | protein=FAD-dependent oxidoreductase                     | protein_id=KGT43143.1 |
| gene | 2964418 | 2965443 | 67558 | 68583 | gene=IY08_15705 | protein=acetyl esterase                                  | protein_id=KGT43144.1 |
| gene | 2965701 | 2966222 | 68841 | 69362 | gene=IY08_15710 | protein=carbonic anhydrase                               | protein_id=KGT43145.1 |
| gene | 2966558 | 2968890 | 69698 | 72030 | gene=IY08_15720 | protein=hypothetical protein                             | protein_id=KGT43089.1 |
| gene | 2968932 | 2970464 | 72072 | 73604 | gene=IY08_15725 | protein=NADH dehydrogenase                               | protein_id=KGT43090.1 |
| gene | 2971072 | 2971434 | 74212 | 74574 | gene=IY08_15730 | protein=hypothetical protein                             | protein_id=KGT43091.1 |
| gene | 2971788 | 2972876 | 74928 | 76016 | gene=IY08_15735 | protein=membrane protein                                 | protein_id=KGT43092.1 |
| gene | 2972904 | 2974091 | 76044 | 77231 | gene=IY08_15740 | protein=spore germination protein                        | protein_id=KGT43093.1 |
| gene | 2974330 | 2975687 | 77470 | 78827 | gene=IY08_15750 | protein=spore germination protein GerA                   | protein_id=KGT43074.1 |
| gene | 2976033 | 2976875 | 79173 | 80015 | gene=IY08_15755 | protein=peptidoglycan N-acetylglucosamine deacetylase    | protein_id=KGT43075.1 |
| gene | 2977271 | 2977828 | 80411 | 80968 | gene=IY08_15760 | protein=streptothricin acetyltransferase                 | protein_id=KGT43076.1 |
| gene | 2977927 | 2978838 | 81067 | 81978 | gene=IY08_15765 | protein=1,4-dihydroxy-2-naphthoate octaprenyltransferase | protein_id=KGT43077.1 |
| gene | 2979118 | 2979522 | 82258 | 82662 | gene=IY08_15770 | protein=arsenate reductase                               | protein_id=KGT43078.1 |
| gene | 2979549 | 2980589 | 82689 | 83729 | gene=IY08_15775 | protein=arsenic resistance protein ArsB                  | protein_id=KGT43079.1 |
| gene | 2980608 | 2981045 | 83748 | 84185 | gene=IY08_15780 | protein=hypothetical protein                             | protein_id=KGT43080.1 |
| gene | 2981106 | 2981411 | 84246 | 84551 | gene=IY08_15785 | protein=ArsR family transcriptional regulator            | protein_id=KGT43081.1 |
| gene | 2981526 | 2981669 | 84666 | 84809 | gene=IY08_15790 | protein=hypothetical protein                             | protein_id=KGT43082.1 |
| gene | 2981943 | 2982452 | 85083 | 85592 | gene=IY08_15795 | protein=squalene-hopene cyclase                          | protein_id=KGT43083.1 |
| gene | 2983116 | 2983850 | 86256 | 86990 | gene=IY08_15800 | protein=membrane protein                                 | protein_id=KGT43084.1 |
| gene | 2983890 | 2984684 | 87030 | 87824 | gene=IY08_15805 | protein=ABC transporter permease                         | protein_id=KGT43085.1 |
| gene | 2984681 | 2985379 | 87821 | 88519 | gene=IY08_15810 | protein=ABC transporter                                  | protein_id=KGT43086.1 |
| gene | 2985376 | 2985756 | 88516 | 88896 | gene=IY08_15815 | protein=GntR family transcriptional regulator            | protein_id=KGT43087.1 |
| gene | 2986628 | 2987134 | 89768 | 90274 | gene=IY08_15820 | protein=hypothetical protein                             | protein_id=KGT43088.1 |
| gene | 2987432 | 2987811 | 90572 | 90951 | pseudo          |                                                          |                       |
| gene | 2988579 | 2990465 | 91719 | 93605 | gene=IY08_15835 | protein=beta-lactamase regulatory protein                | protein_id=KGT43057.1 |
| gene | 2990465 | 2990866 | 93605 | 94006 | gene=IY08_15840 | protein=beta-lactamase repressor                         | protein_id=KGT43058.1 |
| gene | 2991363 | 2993105 | 94503 | 96245 | gene=IY08_15845 | protein=chemotaxis protein                               | protein_id=KGT43059.1 |
| gene | 2993332 | 2994153 | 96472 | 97293 | gene=IY08_15850 | protein=peptidoglycan N-acetylglucosamine deacetylase    | protein_id=KGT43060.1 |
| gene | 2994288 | 2994791 | 97428 | 97931 | gene=IY08_15855 | protein=hypothetical protein                             | protein_id=KGT43061.1 |
| gene | 2995454 | 2996008 | 98594 | 99148 | gene=IY08_15865 | protein=MerR family transcriptional regulator            | protein_id=KGT43062.1 |



|            |         |         |        |        |                 |                                                        |                        |
|------------|---------|---------|--------|--------|-----------------|--------------------------------------------------------|------------------------|
| gene       | 2996157 | 2997584 | 99297  | 100724 | gene=IY08_15870 | protein=glucosaminidase                                | protein_id=KGT43063.1  |
| gene       | 2998244 | 2999893 | 101384 | 103033 | gene=IY08_15875 | protein=S-layer protein                                | protein_id=KGT43064.1  |
| gene       | 3001040 | 3002113 | 104180 | 105253 | gene=IY08_15880 | protein=hypothetical protein                           | protein_id=KGT43065.1  |
| gene       | 3002397 | 3003557 | 105537 | 106697 | gene=IY08_15885 | protein=D-alanyl-D-alanine carboxypeptidase            | protein_id=KGT43066.1  |
| gene       | 3004456 | 3005136 | 107596 | 108276 | gene=IY08_15890 | protein=hypothetical protein                           | protein_id=KGT43067.1  |
| gene       | 3005466 | 3007409 | 108606 | 110549 | gene=IY08_15895 | protein=ABC transporter permease                       | protein_id=KGT43068.1  |
| gene       | 3007384 | 3008154 | 110524 | 111294 | gene=IY08_15900 | protein=bacitracin ABC transporter ATP-binding protein | protein_id=KGT43069.1  |
| gene       | 3008987 | 3009937 | 112127 | 113077 | gene=IY08_15910 | protein=beta-lactamase                                 | protein_id=KGT43070.1  |
| gene       | 3011499 | 3013460 | 114639 | 116600 | gene=IY08_15915 | protein=chitin-binding protein                         | protein_id=KGT43071.1  |
| gene       | 3013958 | 3014443 | 117098 | 117583 | gene=IY08_15920 | protein=hypothetical protein                           | protein_id=KGT43072.1  |
| gene       | 3014704 | 3015468 | 117844 | 118608 | gene=IY08_15925 | protein=short-chain dehydrogenase                      | protein_id=KGT43073.1  |
| scaffold15 |         |         |        |        |                 |                                                        |                        |
| gene       | 3016201 | 3016467 | 1      | 267    | gene=IY08_15935 | protein=transposase                                    | protein_id=KGT43051.1  |
| gene       | 3016677 | 3016838 | 477    | 638    | gene=IY08_15940 | protein=stage 0 sporulation regulatory protein         | protein_id=KGT43052.1  |
| gene       | 3017459 | 3018001 | 1259   | 1801   | gene=IY08_15945 | protein=stress protein                                 | protein_id=KGT43053.1  |
| gene       | 3018668 | 3018907 | 2468   | 2707   | gene=IY08_15950 | protein=DSBA oxidoreductase                            | protein_id=KGT43054.1  |
| gene       | 3019200 | 3020027 | 3000   | 3827   | gene=IY08_15955 | protein=AraC family transcriptional regulator          | protein_id=KGT43055.1  |
| gene       | 3020286 | 3021156 | 4086   | 4956   | pseudo          |                                                        |                        |
| gene       | 3021293 | 3021779 | 5093   | 5579   | gene=IY08_15965 | protein=beta-lactamase regulatory protein              | protein_id=KGT43056.1] |
| gene       | 3021852 | 3023059 | 5652   | 6859   | gene=IY08_15970 | protein=beta-lactamase regulatory protein              | protein_id=KGT43048.1  |
| gene       | 3023203 | 3023604 | 7003   | 7404   | gene=IY08_15975 | protein=beta-lactamase repressor                       | protein_id=KGT43049.1  |
| gene       | 3023972 | 3024162 | 7772   | 7962   | gene=IY08_15980 | protein=transposase                                    | protein_id=KGT43050.1  |
| gene       | 3024249 | 3025131 | 8049   | 8931   | pseudo          |                                                        |                        |
| gene       | 3028005 | 3028544 | 11805  | 12344  | gene=IY08_15995 | protein=hypothetical protein                           | protein_id=KGT42725.1  |
| gene       | 3028957 | 3029649 | 12757  | 13449  | gene=IY08_16000 | protein=transcriptional regulator                      | protein_id=KGT42726.1  |
| gene       | 3029646 | 3030641 | 13446  | 14441  | gene=IY08_16005 | protein=histidine kinase                               | protein_id=KGT42727.1  |
| gene       | 3030757 | 3031518 | 14557  | 15318  | gene=IY08_16010 | protein=bacitracin ABC transporter ATP-binding protein | protein_id=KGT42728.1  |
| gene       | 3031508 | 3033355 | 15308  | 17155  | gene=IY08_16015 | protein=ABC transporter permease                       | protein_id=KGT42729.1  |
| gene       | 3033578 | 3034288 | 17378  | 18088  | gene=IY08_16020 | protein=conjugal transfer protein TraX                 | protein_id=KGT42730.1  |
| gene       | 3034736 | 3036592 | 18536  | 20392  | gene=IY08_16025 | protein=MxaA domain-containing protein                 | protein_id=KGT42731.1  |
| gene       | 3036652 | 3037218 | 20452  | 21018  | gene=IY08_16030 | protein=TetR family transcriptional regulator          | protein_id=KGT42732.1  |

|      |         |         |       |       |                 |                                               |                       |
|------|---------|---------|-------|-------|-----------------|-----------------------------------------------|-----------------------|
| gene | 3037554 | 3038318 | 21354 | 22118 | gene=IY08_16035 | protein=short-chain dehydrogenase             | protein_id=KGT42733.1 |
| gene | 3038486 | 3038926 | 22286 | 22726 | gene=IY08_16040 | protein=AsnC family transcriptional regulator | protein_id=KGT42734.1 |
| gene | 3039098 | 3040303 | 22898 | 24103 | gene=IY08_16045 | protein=amidohydrolase                        | protein_id=KGT42735.1 |
| gene | 3040570 | 3042879 | 24370 | 26679 | gene=IY08_16050 | protein=disulfide oxidoreductase              | protein_id=KGT42736.1 |
| gene | 3042991 | 3043383 | 26791 | 27183 | gene=IY08_16055 | protein=glyoxalase                            | protein_id=KGT42737.1 |
| gene | 3043519 | 3043843 | 27319 | 27643 | pseudo          |                                               |                       |
| gene | 3044160 | 3046235 | 27960 | 30035 | gene=IY08_16065 | protein=beta-lactamase                        | protein_id=KGT42738.1 |
| gene | 3047154 | 3047459 | 30954 | 31259 | gene=IY08_16075 | protein=monooxygenase                         | protein_id=KGT42739.1 |
| gene | 3047655 | 3048008 | 31455 | 31808 | gene=IY08_16080 | protein=hypothetical protein                  | protein_id=KGT42740.1 |
| gene | 3048335 | 3048754 | 32135 | 32554 | gene=IY08_16085 | protein=MarR family transcriptional regulator | protein_id=KGT42741.1 |
| gene | 3049232 | 3049618 | 33032 | 33418 | gene=IY08_16090 | protein=cytoplasmic protein                   | protein_id=KGT42742.1 |
| gene | 3050037 | 3050198 | 33837 | 33998 | gene=IY08_16095 | protein=membrane protein                      | protein_id=KGT42743.1 |
| gene | 3050493 | 3050708 | 34293 | 34508 | gene=IY08_16100 | protein=hypothetical protein                  | protein_id=KGT42744.1 |
| gene | 3051051 | 3052496 | 34851 | 36296 | gene=IY08_16105 | protein=ErfK/YbiS/YcfS/YnhG family protein    | protein_id=KGT42745.1 |
| gene | 3053120 | 3053998 | 36920 | 37798 | gene=IY08_16115 | protein=CAAX protease                         | protein_id=KGT42746.1 |
| gene | 3054359 | 3055696 | 38159 | 39496 | gene=IY08_16120 | protein=erythromycin esterase                 | protein_id=KGT42747.1 |
| gene | 3056053 | 3056631 | 39853 | 40431 | gene=IY08_16125 | protein=luciferase                            | protein_id=KGT42748.1 |
| gene | 3056746 | 3058533 | 40546 | 42333 | gene=IY08_16130 | protein=histidine kinase                      | protein_id=KGT42749.1 |
| gene | 3059050 | 3059436 | 42850 | 43236 | gene=IY08_16135 | protein=hypothetical protein                  | protein_id=KGT42750.1 |
| gene | 3059512 | 3060462 | 43312 | 44262 | gene=IY08_16140 | protein=beta-lactamase                        | protein_id=KGT42751.1 |
| gene | 3060768 | 3061196 | 44568 | 44996 | gene=IY08_16145 | protein=hypothetical protein                  | protein_id=KGT42752.1 |
| gene | 3061870 | 3063981 | 45670 | 47781 | gene=IY08_16150 | protein=cytoplasmic protein                   | protein_id=KGT42753.1 |
| gene | 3064193 | 3067390 | 47993 | 51190 | gene=IY08_16155 | protein=NADPH--cytochrome P450 reductase      | protein_id=KGT42754.1 |
| gene | 3067924 | 3069402 | 51724 | 53202 | gene=IY08_16160 | protein=MFS transporter                       | protein_id=KGT42755.1 |
| gene | 3069799 | 3070395 | 53599 | 54195 | gene=IY08_16165 | protein=hypothetical protein                  | protein_id=KGT42756.1 |
| gene | 3070479 | 3071474 | 54279 | 55274 | gene=IY08_16170 | protein=cytochrome C biogenesis protein CcmE  | protein_id=KGT42757.1 |
| gene | 3071831 | 3073063 | 55631 | 56863 | gene=IY08_16175 | protein=metallophosphoesterase                | protein_id=KGT42758.1 |
| gene | 3073390 | 3074349 | 57190 | 58149 | gene=IY08_16180 | protein=RTCB protein                          | protein_id=KGT42759.1 |
| gene | 3074632 | 3074850 | 58432 | 58650 | gene=IY08_16185 | protein=hypothetical protein                  | protein_id=KGT42760.1 |
| gene | 3074994 | 3075908 | 58794 | 59708 | gene=IY08_16190 | protein=SAM-dependent methyltransferase       | protein_id=KGT42761.1 |
| gene | 3076130 | 3076720 | 59930 | 60520 | gene=IY08_16195 | protein=CRISPR-associated protein Cas2        | protein_id=KGT42762.1 |

|      |         |         |       |       |                 |                                                   |                       |
|------|---------|---------|-------|-------|-----------------|---------------------------------------------------|-----------------------|
| gene | 3076861 | 3077973 | 60661 | 61773 | gene=IY08_16200 | protein=cell wall anchor protein                  | protein_id=KGT42763.1 |
| gene | 3078038 | 3078709 | 61838 | 62509 | gene=IY08_16205 | protein=hemin ABC transporter ATP-binding protein | protein_id=KGT42764.1 |
| gene | 3078709 | 3079773 | 62509 | 63573 | gene=IY08_16210 | protein=ABC transporter permease                  | protein_id=KGT42765.1 |
| gene | 3079959 | 3080582 | 63759 | 64382 | gene=IY08_16215 | protein=ArsR family transcriptional regulator     | protein_id=KGT42766.1 |
| gene | 3080652 | 3081911 | 64452 | 65711 | gene=IY08_16220 | protein=MFS transporter                           | protein_id=KGT42767.1 |
| gene | 3082063 | 3082533 | 65863 | 66333 | gene=IY08_16225 | protein=hypothetical protein                      | protein_id=KGT42768.1 |
| gene | 3082737 | 3084113 | 66537 | 67913 | gene=IY08_16230 | protein=membrane protein                          | protein_id=KGT42769.1 |
| gene | 3084115 | 3084792 | 67915 | 68592 | gene=IY08_16235 | protein=heme response regulator HssR              | protein_id=KGT42770.1 |
| gene | 3084873 | 3085541 | 68673 | 69341 | pseudo          |                                                   |                       |
| gene | 3085656 | 3086108 | 69456 | 69908 | gene=IY08_16245 | protein=MarR family transcriptional regulator     | protein_id=KGT42771.1 |
| gene | 3086134 | 3086652 | 69934 | 70452 | gene=IY08_16250 | protein=GNAT family acetyltransferase             | protein_id=KGT42772.1 |
| gene | 3086675 | 3087298 | 70475 | 71098 | gene=IY08_16255 | protein=protease                                  | protein_id=KGT42773.1 |
| gene | 3087493 | 3088332 | 71293 | 72132 | gene=IY08_16260 | protein=membrane protein YxkD                     | protein_id=KGT42774.1 |
| gene | 3088664 | 3089305 | 72464 | 73105 | gene=IY08_16265 | protein=ATP F0F1 synthase subunit alpha           | protein_id=KGT42775.1 |
| gene | 3089752 | 3090234 | 73552 | 74034 | gene=IY08_16270 | protein=hypothetical protein                      | protein_id=KGT42776.1 |
| gene | 3091093 | 3091503 | 74893 | 75303 | gene=IY08_16275 | protein=PbsX family transcriptional regulator     | protein_id=KGT42777.1 |
| gene | 3091931 | 3092440 | 75731 | 76240 | gene=IY08_16280 | protein=hypothetical protein                      | protein_id=KGT42778.1 |
| gene | 3092582 | 3093829 | 76382 | 77629 | gene=IY08_16285 | protein=hypothetical protein                      | protein_id=KGT42779.1 |
| gene | 3093843 | 3095015 | 77643 | 78815 | gene=IY08_16290 | protein=3-phosphoglycerate dehydrogenase          | protein_id=KGT42780.1 |
| gene | 3095028 | 3096110 | 78828 | 79910 | gene=IY08_16295 | protein=MFS transporter                           | protein_id=KGT42781.1 |
| gene | 3096320 | 3096511 | 80120 | 80311 | gene=IY08_16300 | protein=GNAT family acetyltransferase             | protein_id=KGT42782.1 |
| gene | 3096601 | 3097668 | 80401 | 81468 | gene=IY08_16305 | protein=hypothetical protein                      | protein_id=KGT42783.1 |
| gene | 3097842 | 3098630 | 81642 | 82430 | gene=IY08_16310 | protein=hypothetical protein                      | protein_id=KGT42784.1 |
| gene | 3098712 | 3099077 | 82512 | 82877 | gene=IY08_16315 | protein=hypothetical protein                      | protein_id=KGT42785.1 |
| gene | 3099364 | 3101754 | 83164 | 85554 | gene=IY08_16320 | protein=beta-lactam antibiotic acylase            | protein_id=KGT42786.1 |
| gene | 3101830 | 3102594 | 85630 | 86394 | gene=IY08_16325 | protein=XRE family transcriptional regulator      | protein_id=KGT42787.1 |
| gene | 3103062 | 3104882 | 86862 | 88682 | gene=IY08_16330 | protein=N-acetylmuramoyl-L-alanine amidase        | protein_id=KGT42788.1 |
| gene | 3105218 | 3105676 | 89018 | 89476 | gene=IY08_16335 | protein=lipoprotein                               | protein_id=KGT42789.1 |
| gene | 3105832 | 3106788 | 89632 | 90588 | gene=IY08_16340 | protein=membrane protein                          | protein_id=KGT42790.1 |
| gene | 3106845 | 3107174 | 90645 | 90974 | gene=IY08_16345 | protein=hypothetical protein                      | protein_id=KGT42791.1 |
| gene | 3107276 | 3107614 | 91076 | 91414 | gene=IY08_16350 | protein=hypothetical protein                      | protein_id=KGT42792.1 |

|      |         |         |        |        |                 |                                       |                       |
|------|---------|---------|--------|--------|-----------------|---------------------------------------|-----------------------|
| gene | 3107734 | 3108108 | 91534  | 91908  | gene=IY08_16355 | protein=hypothetical protein          | protein_id=KGT42793.1 |
| gene | 3108202 | 3108690 | 92002  | 92490  | gene=IY08_16360 | protein=cytoplasmic protein           | protein_id=KGT42794.1 |
| gene | 3108895 | 3109602 | 92695  | 93402  | gene=IY08_16365 | protein=DNA alkylation repair protein | protein_id=KGT42795.1 |
| gene | 3109691 | 3110158 | 93491  | 93958  | gene=IY08_16370 | protein=cytoplasmic protein           | protein_id=KGT42796.1 |
| gene | 3110225 | 3110653 | 94025  | 94453  | gene=IY08_16375 | protein=SMI1/KNR4 family protein      | protein_id=KGT42797.1 |
| gene | 3110718 | 3111107 | 94518  | 94907  | gene=IY08_16380 | protein=hypothetical protein          | protein_id=KGT42798.1 |
| gene | 3111680 | 3112231 | 95480  | 96031  | gene=IY08_16390 | protein=hypothetical protein          | protein_id=KGT42799.1 |
| gene | 3112336 | 3112890 | 96136  | 96690  | pseudo          |                                       |                       |
| gene | 3112915 | 3113112 | 96715  | 96912  | gene=IY08_16400 | protein=hypothetical protein          | protein_id=KGT42800.1 |
| gene | 3113377 | 3114189 | 97177  | 97989  | gene=IY08_16405 | protein=membrane protein              | protein_id=KGT42801.1 |
| gene | 3114297 | 3114575 | 98097  | 98375  | gene=IY08_16410 | protein=hypothetical protein          | protein_id=KGT42802.1 |
| gene | 3115237 | 3115854 | 99037  | 99654  | gene=IY08_16415 | protein=cytoplasmic protein           | protein_id=KGT42803.1 |
| gene | 3116124 | 3116357 | 99924  | 100157 | gene=IY08_16420 | protein=hypothetical protein          | protein_id=KGT42804.1 |
| gene | 3116441 | 3116857 | 100241 | 100657 | gene=IY08_16425 | protein=SMI1/KNR4 family protein      | protein_id=KGT42805.1 |
| gene | 3117014 | 3117472 | 100814 | 101272 | gene=IY08_16430 | protein=morn repeat protein           | protein_id=KGT42806.1 |
| gene | 3117757 | 3118140 | 101557 | 101940 | gene=IY08_16435 | protein=hypothetical protein          | protein_id=KGT42807.1 |
| gene | 3118153 | 3119313 | 101953 | 103113 | gene=IY08_16440 | protein=cytoplasmic protein           | protein_id=KGT42808.1 |
| gene | 3119372 | 3119755 | 103172 | 103555 | gene=IY08_16445 | protein=beta-lactamase                | protein_id=KGT42809.1 |
| gene | 3119818 | 3120201 | 103618 | 104001 | gene=IY08_16450 | protein=beta-lactamase                | protein_id=KGT42810.1 |
| gene | 3120452 | 3120808 | 104252 | 104608 | gene=IY08_16455 | protein=hypothetical protein          | protein_id=KGT42811.1 |
| gene | 3120906 | 3121238 | 104706 | 105038 | gene=IY08_16460 | protein=hypothetical protein          | protein_id=KGT42812.1 |
| gene | 3121546 | 3121800 | 105346 | 105600 | gene=IY08_16465 | protein=hypothetical protein          | protein_id=KGT42813.1 |
| gene | 3121986 | 3122231 | 105786 | 106031 | gene=IY08_16470 | protein=hypothetical protein          | protein_id=KGT42814.1 |
| gene | 3122427 | 3122861 | 106227 | 106661 | gene=IY08_16475 | protein=SMI1 / KNR4 family protein    | protein_id=KGT42815.1 |
| gene | 3122976 | 3123155 | 106776 | 106955 | gene=IY08_16480 | protein=hypothetical protein          | protein_id=KGT42816.1 |
| gene | 3123156 | 3123407 | 106956 | 107207 | gene=IY08_16485 | protein=hypothetical protein          | protein_id=KGT42817.1 |
| gene | 3123531 | 3124055 | 107331 | 107855 | gene=IY08_16490 | protein=hypothetical protein          | protein_id=KGT42818.1 |
| gene | 3124112 | 3124567 | 107912 | 108367 | gene=IY08_16495 | protein=hypothetical protein          | protein_id=KGT42819.1 |
| gene | 3124596 | 3125063 | 108396 | 108863 | gene=IY08_16500 | protein=cytoplasmic protein           | protein_id=KGT42820.1 |
| gene | 3125136 | 3125789 | 108936 | 109589 | gene=IY08_16505 | protein=SMI1/KNR4 family protein      | protein_id=KGT42821.1 |
| gene | 3125903 | 3126052 | 109703 | 109852 | gene=IY08_16510 | protein=hypothetical protein          | protein_id=KGT42822.1 |

|      |         |         |        |        |                 |                                                    |                       |
|------|---------|---------|--------|--------|-----------------|----------------------------------------------------|-----------------------|
| gene | 3126005 | 3126412 | 109805 | 110212 | pseudo          |                                                    |                       |
| gene | 3126759 | 3127415 | 110559 | 111215 | gene=IY08_16520 | protein=hypothetical protein                       | protein_id=KGT42823.1 |
| gene | 3127591 | 3128022 | 111391 | 111822 | gene=IY08_16525 | protein=SMI1/KNR4 family protein                   | protein_id=KGT42824.1 |
| gene | 3128041 | 3128532 | 111841 | 112332 | gene=IY08_16530 | protein=SMI1/KNR4 family protein                   | protein_id=KGT42825.1 |
| gene | 3129209 | 3129553 | 113009 | 113353 | gene=IY08_16535 | protein=hypothetical protein                       | protein_id=KGT42826.1 |
| gene | 3129910 | 3130380 | 113710 | 114180 | gene=IY08_16540 | protein=hypothetical protein                       | protein_id=KGT42827.1 |
| gene | 3130416 | 3130844 | 114216 | 114644 | gene=IY08_16545 | protein=hypothetical protein                       | protein_id=KGT42828.1 |
| gene | 3130849 | 3131151 | 114649 | 114951 | gene=IY08_16550 | protein=hypothetical protein                       | protein_id=KGT42829.1 |
| gene | 3131473 | 3131964 | 115273 | 115764 | gene=IY08_16560 | protein=GNAT family acetyltransferase              | protein_id=KGT42830.1 |
| gene | 3132004 | 3132519 | 115804 | 116319 | pseudo          |                                                    |                       |
| gene | 3133052 | 3133561 | 116852 | 117361 | gene=IY08_16570 | protein=ankyrin                                    | protein_id=KGT42831.1 |
| gene | 3133582 | 3135255 | 117382 | 119055 | gene=IY08_16575 | protein=membrane protein                           | protein_id=KGT42832.1 |
| gene | 3135289 | 3135615 | 119089 | 119415 | gene=IY08_16580 | protein=MFS transporter                            | protein_id=KGT42833.1 |
| gene | 3135615 | 3136334 | 119415 | 120134 | gene=IY08_16585 | protein=hypothetical protein                       | protein_id=KGT42834.1 |
| gene | 3136357 | 3136662 | 120157 | 120462 | gene=IY08_16590 | protein=hypothetical protein                       | protein_id=KGT42835.1 |
| gene | 3136689 | 3137111 | 120489 | 120911 | gene=IY08_16595 | protein=EsaC-like protein                          | protein_id=KGT42836.1 |
| gene | 3137757 | 3138476 | 121557 | 122276 | gene=IY08_16600 | protein=peptidase M15                              | protein_id=KGT42837.1 |
| gene | 3138537 | 3139772 | 122337 | 123572 | gene=IY08_16605 | protein=capsular biosynthesis protein              | protein_id=KGT42838.1 |
| gene | 3140371 | 3140571 | 124171 | 124371 | gene=IY08_16610 | protein=hypothetical protein                       | protein_id=KGT42839.1 |
| gene | 3140555 | 3141751 | 124355 | 125551 | gene=IY08_16615 | protein=MFS transporter                            | protein_id=KGT42840.1 |
| gene | 3141869 | 3142102 | 125669 | 125902 | gene=IY08_16620 | protein=hypothetical protein                       | protein_id=KGT42841.1 |
| gene | 3142163 | 3143065 | 125963 | 126865 | gene=IY08_16625 | protein=3-oxoadipate enol-lactonase                | protein_id=KGT42842.1 |
| gene | 3143255 | 3143671 | 127055 | 127471 | gene=IY08_16630 | protein=MarR family transcriptional regulator      | protein_id=KGT42843.1 |
| gene | 3143687 | 3144886 | 127487 | 128686 | gene=IY08_16635 | protein=multidrug MFS transporter                  | protein_id=KGT42844.1 |
| gene | 3144987 | 3146246 | 128787 | 130046 | gene=IY08_16640 | protein=6-aminohexanoate hydrolase                 | protein_id=KGT42845.1 |
| gene | 3146420 | 3146902 | 130220 | 130702 | gene=IY08_16645 | protein=hypothetical protein                       | protein_id=KGT42846.1 |
| gene | 3147140 | 3148486 | 130940 | 132286 | gene=IY08_16650 | protein=short-chain fatty acid transporter         | protein_id=KGT42847.1 |
| gene | 3148527 | 3148880 | 132327 | 132680 | gene=IY08_16655 | protein=group-specific protein                     | protein_id=KGT42848.1 |
| gene | 3148877 | 3149452 | 132677 | 133252 | gene=IY08_16660 | protein=NADPH dehydrogenase                        | protein_id=KGT42849.1 |
| gene | 3149476 | 3149865 | 133276 | 133665 | gene=IY08_16665 | protein=zinc finger SWIM domain-containing protein | protein_id=KGT42850.1 |
| gene | 3150127 | 3150384 | 133927 | 134184 | gene=IY08_16670 | protein=hypothetical protein                       | protein_id=KGT42851.1 |

|      |         |         |        |        |                 |                                                       |                       |
|------|---------|---------|--------|--------|-----------------|-------------------------------------------------------|-----------------------|
| gene | 3150715 | 3150906 | 134515 | 134706 | gene=IY08_16675 | protein=hypothetical protein                          | protein_id=KGT42852.1 |
| gene | 3150937 | 3151659 | 134737 | 135459 | gene=IY08_16680 | protein=membrane protein                              | protein_id=KGT42853.1 |
| gene | 3151842 | 3152543 | 135642 | 136343 | gene=IY08_16685 | protein=membrane protein                              | protein_id=KGT42854.1 |
| gene | 3152516 | 3154171 | 136316 | 137971 | gene=IY08_16690 | protein=cobalt ABC transporter ATP-binding protein    | protein_id=KGT42855.1 |
| gene | 3154150 | 3155028 | 137950 | 138828 | gene=IY08_16695 | protein=ABC transporter permease                      | protein_id=KGT42856.1 |
| gene | 3155051 | 3155890 | 138851 | 139690 | gene=IY08_16700 | protein=hypothetical protein                          | protein_id=KGT42857.1 |
| gene | 3155948 | 3157786 | 139748 | 141586 | gene=IY08_16705 | protein=cell wall anchor protein                      | protein_id=KGT42858.1 |
| gene | 3158126 | 3158605 | 141926 | 142405 | gene=IY08_16710 | protein=ribonuclease                                  | protein_id=KGT42859.1 |
| gene | 3158805 | 3160235 | 142605 | 144035 | gene=IY08_16715 | protein=membrane protein                              | protein_id=KGT42860.1 |
| gene | 3160393 | 3161220 | 144193 | 145020 | gene=IY08_16720 | protein=ribonuclease                                  | protein_id=KGT42861.1 |
| gene | 3161720 | 3162076 | 145520 | 145876 | gene=IY08_16725 | protein=ATPase                                        | protein_id=KGT42862.1 |
| gene | 3162525 | 3163379 | 146325 | 147179 | gene=IY08_16730 | protein=acetyltransferase                             | protein_id=KGT42863.1 |
| gene | 3163851 | 3164228 | 147651 | 148028 | gene=IY08_16735 | protein=hypothetical protein                          | protein_id=KGT42864.1 |
| gene | 3165061 | 3165537 | 148861 | 149337 | gene=IY08_16740 | protein=regulatory protein                            | protein_id=KGT42865.1 |
| gene | 3165883 | 3167160 | 149683 | 150960 | gene=IY08_16745 | protein=histidine--tRNA ligase                        | protein_id=KGT42866.1 |
| gene | 3167321 | 3167632 | 151121 | 151432 | gene=IY08_16750 | protein=membrane protein                              | protein_id=KGT42867.1 |
| gene | 3167854 | 3168453 | 151654 | 152253 | gene=IY08_16755 | protein=hypothetical protein                          | protein_id=KGT42868.1 |
| gene | 3168545 | 3168925 | 152345 | 152725 | gene=IY08_16760 | protein=MarR family transcriptional regulator         | protein_id=KGT42869.1 |
| gene | 3169055 | 3169738 | 152855 | 153538 | gene=IY08_16765 | protein=NAD(P)H nitroreductase YfkO                   | protein_id=KGT42870.1 |
| gene | 3169898 | 3170173 | 153698 | 153973 | gene=IY08_16770 | protein=cyclopropane-fatty-acyl-phospholipid synthase | protein_id=KGT42871.1 |
| gene | 3170224 | 3171282 | 154024 | 155082 | gene=IY08_16775 | protein=pyruvate kinase                               | protein_id=KGT42872.1 |
| gene | 3171565 | 3172041 | 155365 | 155841 | gene=IY08_16780 | protein=XoxI protein                                  | protein_id=KGT42873.1 |
| gene | 3172113 | 3173051 | 155913 | 156851 | gene=IY08_16785 | protein=hypothetical protein                          | protein_id=KGT42874.1 |
| gene | 3173114 | 3173830 | 156914 | 157630 | gene=IY08_16790 | protein=lipoprotein                                   | protein_id=KGT42875.1 |
| gene | 3174170 | 3174928 | 157970 | 158728 | gene=IY08_16795 | protein=3-ketoacyl-ACP reductase                      | protein_id=KGT42876.1 |
| gene | 3174986 | 3176644 | 158786 | 160444 | gene=IY08_16800 | protein=ABC transporter permease                      | protein_id=KGT42877.1 |
| gene | 3176637 | 3177362 | 160437 | 161162 | gene=IY08_16805 | protein=ABC transporter                               | protein_id=KGT42878.1 |
| gene | 3177451 | 3177645 | 161251 | 161445 | gene=IY08_16810 | protein=hypothetical protein                          | protein_id=KGT42879.1 |
| gene | 3177825 | 3178184 | 161625 | 161984 | gene=IY08_16815 | protein=hypothetical protein                          | protein_id=KGT42880.1 |
| gene | 3178172 | 3178372 | 161972 | 162172 | gene=IY08_16820 | protein=DNA-binding protein                           | protein_id=KGT42881.1 |
| gene | 3178451 | 3179416 | 162251 | 163216 | gene=IY08_16825 | protein=cytoplasmic protein                           | protein_id=KGT42882.1 |

|      |         |         |        |        |                 |                                                    |                       |
|------|---------|---------|--------|--------|-----------------|----------------------------------------------------|-----------------------|
| gene | 3179746 | 3180456 | 163546 | 164256 | gene=IY08_16830 | protein=2-haloalkanoic acid dehalogenase           | protein_id=KGT42883.1 |
| gene | 3180544 | 3181566 | 164344 | 165366 | gene=IY08_16835 | protein=protein tyrosine phosphatase               | protein_id=KGT42884.1 |
| gene | 3181656 | 3182495 | 165456 | 166295 | gene=IY08_16840 | protein=hypothetical protein                       | protein_id=KGT42885.1 |
| gene | 3182547 | 3183269 | 166347 | 167069 | gene=IY08_16845 | protein=acetyltransferase                          | protein_id=KGT42886.1 |
| gene | 3183393 | 3184232 | 167193 | 168032 | gene=IY08_16850 | protein=hypothetical protein                       | protein_id=KGT42887.1 |
| gene | 3184250 | 3184696 | 168050 | 168496 | gene=IY08_16855 | protein=DNA mismatch repair protein MutT           | protein_id=KGT42888.1 |
| gene | 3184705 | 3185703 | 168505 | 169503 | gene=IY08_16860 | protein=tryptophan--tRNA ligase                    | protein_id=KGT42889.1 |
| gene | 3186093 | 3186290 | 169893 | 170090 | gene=IY08_16865 | protein=hypothetical protein                       | protein_id=KGT42890.1 |
| gene | 3186342 | 3187463 | 170142 | 171263 | gene=IY08_16870 | protein=membrane protein                           | protein_id=KGT42891.1 |
| gene | 3187527 | 3187775 | 171327 | 171575 | gene=IY08_16875 | protein=membrane protein                           | protein_id=KGT42892.1 |
| gene | 3187985 | 3188446 | 171785 | 172246 | gene=IY08_16880 | protein=acetyltransferase                          | protein_id=KGT42893.1 |
| gene | 3188724 | 3188867 | 172524 | 172667 | gene=IY08_16885 | protein=hypothetical protein                       | protein_id=KGT42894.1 |
| gene | 3188941 | 3190830 | 172741 | 174630 | gene=IY08_16890 | protein=triple helix repeat-containing collagen    | protein_id=KGT42895.1 |
| gene | 3190853 | 3193351 | 174653 | 177151 | gene=IY08_16895 | protein=triple helix repeat-containing collagen    | protein_id=KGT42896.1 |
| gene | 3193659 | 3194573 | 177459 | 178373 | gene=IY08_16900 | protein=TPR repeat-containing protein              | protein_id=KGT42897.1 |
| gene | 3194872 | 3195249 | 178672 | 179049 | gene=IY08_16905 | protein=lipoprotein                                | protein_id=KGT42898.1 |
| gene | 3195326 | 3195565 | 179126 | 179365 | gene=IY08_16910 | protein=membrane protein                           | protein_id=KGT42899.1 |
| gene | 3195688 | 3196236 | 179488 | 180036 | gene=IY08_16915 | protein=hypothetical protein                       | protein_id=KGT42900.1 |
| gene | 3196435 | 3196848 | 180235 | 180648 | gene=IY08_16920 | protein=ATP synthase subunit I                     | protein_id=KGT42901.1 |
| gene | 3196901 | 3198229 | 180701 | 182029 | gene=IY08_16925 | protein=membrane protein                           | protein_id=KGT42902.1 |
| gene | 3198349 | 3198729 | 182149 | 182529 | gene=IY08_16930 | protein=MerR family transcriptional regulator      | protein_id=KGT42903.1 |
| gene | 3199018 | 3199791 | 182818 | 183591 | gene=IY08_16935 | protein=hypothetical protein                       | protein_id=KGT42904.1 |
| gene | 3199907 | 3200674 | 183707 | 184474 | gene=IY08_16940 | protein=glucose-1-phosphate cytidylyltransferase   | protein_id=KGT42905.1 |
| gene | 3200676 | 3201731 | 184476 | 185531 | gene=IY08_16945 | protein=CDP-glucose 4,6-dehydratase                | protein_id=KGT42906.1 |
| gene | 3201744 | 3202967 | 185544 | 186767 | gene=IY08_16950 | protein=SAM-dependent methyltransferase            | protein_id=KGT42907.1 |
| gene | 3202964 | 3203887 | 186764 | 187687 | gene=IY08_16955 | protein=CDP-4-dehydro-6-deoxy-D-gulose 4-reductase | protein_id=KGT42908.1 |
| gene | 3203856 | 3204557 | 187656 | 188357 | gene=IY08_16960 | protein=hypothetical protein                       | protein_id=KGT42909.1 |
| gene | 3204718 | 3205068 | 188518 | 188868 | gene=IY08_16965 | protein=hypothetical protein                       | protein_id=KGT42910.1 |
| gene | 3205273 | 3206157 | 189073 | 189957 | gene=IY08_16970 | protein=membrane protein                           | protein_id=KGT42911.1 |
| gene | 3206340 | 3207161 | 190140 | 190961 | gene=IY08_16980 | protein=hypothetical protein                       | protein_id=KGT42912.1 |
| gene | 3207357 | 3207530 | 191157 | 191330 | gene=IY08_16985 | protein=alginate lyase                             | protein_id=KGT42913.1 |

|      |         |         |        |        |                 |                                                 |                       |
|------|---------|---------|--------|--------|-----------------|-------------------------------------------------|-----------------------|
| gene | 3207577 | 3208644 | 191377 | 192444 | gene=IY08_16990 | protein=6-phosphogluconolactonase               | protein_id=KGT42914.1 |
| gene | 3208765 | 3210306 | 192565 | 194106 | gene=IY08_16995 | protein=gluconokinase                           | protein_id=KGT42915.1 |
| gene | 3210416 | 3211741 | 194216 | 195541 | gene=IY08_17000 | protein=gluconate permease                      | protein_id=KGT42916.1 |
| gene | 3212132 | 3212800 | 195932 | 196600 | gene=IY08_17005 | protein=transaldolase                           | protein_id=KGT42917.1 |
| gene | 3212910 | 3213803 | 196710 | 197603 | gene=IY08_17010 | protein=6-phosphogluconate dehydrogenase        | protein_id=KGT42918.1 |
| gene | 3213916 | 3215910 | 197716 | 199710 | gene=IY08_17015 | protein=transketolase                           | protein_id=KGT42919.1 |
| gene | 3215950 | 3217434 | 199750 | 201234 | gene=IY08_17020 | protein=glucose-6-phosphate dehydrogenase       | protein_id=KGT42920.1 |
| gene | 3218033 | 3218212 | 201833 | 202012 | pseudo          |                                                 |                       |
| gene | 3218323 | 3219318 | 202123 | 203118 | gene=IY08_17030 | protein=quinone oxidoreductase                  | protein_id=KGT42921.1 |
| gene | 3219607 | 3221304 | 203407 | 205104 | gene=IY08_17035 | protein=bacillolysin                            | protein_id=KGT42922.1 |
| gene | 3221471 | 3223699 | 205271 | 207499 | gene=IY08_17040 | protein=enhancin                                | protein_id=KGT42923.1 |
| gene | 3224066 | 3225790 | 207866 | 209590 | gene=IY08_17045 | protein=chemotaxis protein                      | protein_id=KGT42924.1 |
| gene | 3226249 | 3226818 | 210049 | 210618 | gene=IY08_17055 | protein=nucleotidase                            | protein_id=KGT42925.1 |
| gene | 3226878 | 3227981 | 210678 | 211781 | gene=IY08_17060 | protein=5-amino-6-(5-phosphoribosylamino)uracil | protein_id=KGT42926.1 |
| gene | 3227974 | 3228711 | 211774 | 212511 | gene=IY08_17065 | protein=GTP cyclohydrolase                      | protein_id=KGT42927.1 |
| gene | 3229014 | 3229331 | 212814 | 213131 | gene=IY08_17070 | protein=HxIR family transcriptional regulator   | protein_id=KGT42928.1 |
| gene | 3229665 | 3230264 | 213465 | 214064 | gene=IY08_17075 | protein=nitroreductase                          | protein_id=KGT42929.1 |
| gene | 3230749 | 3231225 | 214549 | 215025 | gene=IY08_17080 | protein=hypothetical protein                    | protein_id=KGT42930.1 |
| gene | 3231766 | 3232137 | 215566 | 215937 | gene=IY08_17085 | protein=membrane protein                        | protein_id=KGT42931.1 |
| gene | 3232205 | 3232392 | 216005 | 216192 | pseudo          |                                                 |                       |
| gene | 3233101 | 3233442 | 216901 | 217242 | gene=IY08_17095 | protein=alkylphosphonate utilization protein    | protein_id=KGT42932.1 |
| gene | 3233722 | 3235485 | 217522 | 219285 | gene=IY08_17100 | protein=sulfate transporter                     | protein_id=KGT42933.1 |
| gene | 3235586 | 3236026 | 219386 | 219826 | gene=IY08_17105 | protein=DNA mismatch repair protein             | protein_id=KGT42934.1 |
| gene | 3236028 | 3236381 | 219828 | 220181 | gene=IY08_17110 | protein=ArsR family transcriptional regulator   | protein_id=KGT42935.1 |
| gene | 3236806 | 3238125 | 220606 | 221925 | gene=IY08_17115 | protein=septum formation initiator              | protein_id=KGT42936.1 |
| gene | 3239228 | 3239563 | 223028 | 223363 | gene=IY08_17120 | protein=group-specific protein                  | protein_id=KGT42937.1 |
| gene | 3239687 | 3240100 | 223487 | 223900 | gene=IY08_17125 | protein=Rrf2 family transcriptional regulator   | protein_id=KGT42938.1 |
| gene | 3240286 | 3240420 | 224086 | 224220 | gene=IY08_17130 | protein=molecular chaperone                     | protein_id=KGT42939.1 |
| gene | 3240467 | 3240862 | 224267 | 224662 | gene=IY08_17135 | protein=ArsR family transcriptional regulator   | protein_id=KGT42940.1 |
| gene | 3241138 | 3241875 | 224938 | 225675 | gene=IY08_17140 | protein=GntR family transcriptional regulator   | protein_id=KGT42941.1 |
| gene | 3241908 | 3242969 | 225708 | 226769 | gene=IY08_17145 | protein=oxidoreductase                          | protein_id=KGT42942.1 |



|      |         |         |        |        |                 |                                               |                       |
|------|---------|---------|--------|--------|-----------------|-----------------------------------------------|-----------------------|
| gene | 3243202 | 3243618 | 227002 | 227418 | gene=IY08_17150 | protein=XoxI                                  | protein_id=KGT42943.1 |
| gene | 3243779 | 3245155 | 227579 | 228955 | gene=IY08_17155 | protein=collagenase                           | protein_id=KGT42944.1 |
| gene | 3245523 | 3246089 | 229323 | 229889 | gene=IY08_17160 | protein=esterase                              | protein_id=KGT42945.1 |
| gene | 3246105 | 3246929 | 229905 | 230729 | gene=IY08_17165 | protein=hypothetical protein                  | protein_id=KGT42946.1 |
| gene | 3247116 | 3247964 | 230916 | 231764 | gene=IY08_17170 | protein=aminoglycoside phosphotransferase     | protein_id=KGT42947.1 |
| gene | 3248152 | 3248901 | 231952 | 232701 | gene=IY08_17175 | protein=SMS protein                           | protein_id=KGT42948.1 |
| gene | 3248986 | 3249195 | 232786 | 232995 | gene=IY08_17180 | protein=hypothetical protein                  | protein_id=KGT42949.1 |
| gene | 3249277 | 3250176 | 233077 | 233976 | gene=IY08_17185 | protein=isomerase                             | protein_id=KGT42950.1 |
| gene | 3250188 | 3250964 | 233988 | 234764 | pseudo          |                                               |                       |
| gene | 3250961 | 3251665 | 234761 | 235465 | gene=IY08_17195 | protein=short-chain dehydrogenase             | protein_id=KGT42951.1 |
| gene | 3251662 | 3252225 | 235462 | 236025 | gene=IY08_17200 | protein=GNAT family acetyltransferase         | protein_id=KGT42952.1 |
| gene | 3252408 | 3252956 | 236208 | 236756 | gene=IY08_17205 | protein=acetyltransferase                     | protein_id=KGT42953.1 |
| gene | 3253120 | 3254622 | 236920 | 238422 | gene=IY08_17210 | protein=acyl--CoA ligase                      | protein_id=KGT42954.1 |
| gene | 3254757 | 3255290 | 238557 | 239090 | gene=IY08_17215 | protein=NAD(P)H oxidoreductase                | protein_id=KGT42955.1 |
| gene | 3255415 | 3255738 | 239215 | 239538 | gene=IY08_17220 | protein=MarR family transcriptional regulator | protein_id=KGT42956.1 |
| gene | 3255932 | 3256087 | 239732 | 239887 | gene=IY08_17225 | protein=hypothetical protein                  | protein_id=KGT42957.1 |
| gene | 3256181 | 3256456 | 239981 | 240256 | gene=IY08_17230 | protein=ArsR family transcriptional regulator | protein_id=KGT42958.1 |
| gene | 3256707 | 3260047 | 240507 | 243847 | pseudo          |                                               |                       |
| gene | 3260220 | 3261557 | 244020 | 245357 | gene=IY08_17240 | protein=membrane protein                      | protein_id=KGT42959.1 |
| gene | 3261547 | 3262269 | 245347 | 246069 | gene=IY08_17245 | protein=RNA polymerase sigma factor SigI      | protein_id=KGT42960.1 |
| gene | 3262845 | 3263606 | 246645 | 247406 | gene=IY08_17250 | protein=glycosyl transferase family 2         | protein_id=KGT42961.1 |
| gene | 3264020 | 3265312 | 247820 | 249112 | gene=IY08_17255 | protein=glycosyl hydrolase                    | protein_id=KGT42962.1 |
| gene | 3265775 | 3266022 | 249575 | 249822 | pseudo          |                                               |                       |
| gene | 3266044 | 3266676 | 249844 | 250476 | gene=IY08_17265 | protein=lysine transporter LysE               | protein_id=KGT42963.1 |
| gene | 3266828 | 3267085 | 250628 | 250885 | gene=IY08_17270 | protein=hypothetical protein                  | protein_id=KGT42964.1 |
| gene | 3267232 | 3267711 | 251032 | 251511 | gene=IY08_17275 | protein=transcriptional regulator             | protein_id=KGT42965.1 |
| gene | 3267821 | 3268783 | 251621 | 252583 | gene=IY08_17280 | protein=decaprenyl diphosphate synthase       | protein_id=KGT42966.1 |
| gene | 3268947 | 3269696 | 252747 | 253496 | gene=IY08_17285 | protein=ABC transporter permease              | protein_id=KGT42967.1 |
| gene | 3269697 | 3270458 | 253497 | 254258 | gene=IY08_17290 | protein=glycosyl transferase family 8         | protein_id=KGT42968.1 |
| gene | 3270629 | 3270970 | 254429 | 254770 | gene=IY08_17295 | protein=cytoplasmic protein                   | protein_id=KGT42969.1 |
| gene | 3271046 | 3271366 | 254846 | 255166 | gene=IY08_17300 | protein=PadR family transcriptional regulator | protein_id=KGT42970.1 |

|      |         |         |        |        |                 |                                                                    |                       |
|------|---------|---------|--------|--------|-----------------|--------------------------------------------------------------------|-----------------------|
| gene | 3271830 | 3273146 | 255630 | 256946 | gene=IY08_17305 | protein=condensation protein                                       | protein_id=KGT42971.1 |
| gene | 3274011 | 3275297 | 257811 | 259097 | gene=IY08_17310 | protein=hydroxylamine reductase                                    | protein_id=KGT42972.1 |
| gene | 3276036 | 3276809 | 259836 | 260609 | gene=IY08_17320 | protein=beta-lactamase                                             | protein_id=KGT42973.1 |
| gene | 3276965 | 3277246 | 260765 | 261046 | gene=IY08_17325 | protein=hypothetical protein                                       | protein_id=KGT42974.1 |
| gene | 3277380 | 3277574 | 261180 | 261374 | gene=IY08_17330 | protein=hypothetical protein                                       | protein_id=KGT42975.1 |
| gene | 3277620 | 3278657 | 261420 | 262457 | gene=IY08_17335 | protein=penicillin-binding protein                                 | protein_id=KGT42976.1 |
| gene | 3278694 | 3278942 | 262494 | 262742 | gene=IY08_17340 | protein=hypothetical protein                                       | protein_id=KGT42977.1 |
| gene | 3279222 | 3280265 | 263022 | 264065 | gene=IY08_17345 | protein=oxidoreductase                                             | protein_id=KGT42978.1 |
| gene | 3280403 | 3281134 | 264203 | 264934 | gene=IY08_17350 | protein=phosphoesterase                                            | protein_id=KGT42979.1 |
| gene | 3281156 | 3281848 | 264956 | 265648 | gene=IY08_17355 | protein=catabolite gene activator protein                          | protein_id=KGT42980.1 |
| gene | 3281957 | 3282403 | 265757 | 266203 | gene=IY08_17360 | protein=membrane protein                                           | protein_id=KGT42981.1 |
| gene | 3282417 | 3282881 | 266217 | 266681 | gene=IY08_17365 | protein=membrane protein                                           | protein_id=KGT42982.1 |
| gene | 3282971 | 3283465 | 266771 | 267265 | gene=IY08_17370 | protein=hypothetical protein                                       | protein_id=KGT42983.1 |
| gene | 3283506 | 3284258 | 267306 | 268058 | gene=IY08_17375 | protein=N-acyl homoserine lactonase                                | protein_id=KGT42984.1 |
| gene | 3284686 | 3286077 | 268486 | 269877 | gene=IY08_17380 | protein=D-alanine/D-serine/glycine permease                        | protein_id=KGT42985.1 |
| gene | 3286657 | 3287856 | 270457 | 271656 | gene=IY08_17385 | protein=multidrug transporter CflA                                 | protein_id=KGT42986.1 |
| gene | 3288219 | 3288785 | 272019 | 272585 | gene=IY08_17390 | protein=hypothetical protein                                       | protein_id=KGT42987.1 |
| gene | 3288852 | 3289076 | 272652 | 272876 | gene=IY08_17395 | protein=hypothetical protein                                       | protein_id=KGT42988.1 |
| gene | 3289395 | 3289673 | 273195 | 273473 | gene=IY08_17405 | protein=hypothetical protein                                       | protein_id=KGT42989.1 |
| gene | 3290416 | 3291159 | 274216 | 274959 | gene=IY08_17410 | protein=short-chain dehydrogenase                                  | protein_id=KGT42990.1 |
| gene | 3291270 | 3291932 | 275070 | 275732 | gene=IY08_17415 | protein=deacetylase                                                | protein_id=KGT42991.1 |
| gene | 3291948 | 3292298 | 275748 | 276098 | gene=IY08_17420 | protein=hypothetical protein                                       | protein_id=KGT42992.1 |
| gene | 3292561 | 3293886 | 276361 | 277686 | gene=IY08_17425 | protein=membrane protein                                           | protein_id=KGT42993.1 |
| gene | 3293960 | 3294187 | 277760 | 277987 | gene=IY08_17430 | protein=hypothetical protein                                       | protein_id=KGT42994.1 |
| gene | 3294287 | 3294838 | 278087 | 278638 | pseudo          |                                                                    |                       |
| gene | 3295002 | 3295910 | 278802 | 279710 | gene=IY08_17440 | protein=iron-hydroxamate ABC transporter substrate-binding protein | protein_id=KGT42995.1 |
| gene | 3295932 | 3296948 | 279732 | 280748 | gene=IY08_17445 | protein=iron ABC transporter permease                              | protein_id=KGT42996.1 |
| gene | 3296949 | 3297983 | 280749 | 281783 | gene=IY08_17450 | protein=ferrichrome ABC transporter permease                       | protein_id=KGT42997.1 |
| gene | 3298259 | 3299023 | 282059 | 282823 | gene=IY08_17455 | protein=hypothetical protein                                       | protein_id=KGT42998.1 |
| gene | 3299107 | 3300093 | 282907 | 283893 | gene=IY08_17460 | protein=hypothetical protein                                       | protein_id=KGT42999.1 |

|      |         |         |        |        |                 |                                                 |                       |
|------|---------|---------|--------|--------|-----------------|-------------------------------------------------|-----------------------|
| gene | 3300303 | 3300758 | 284103 | 284558 | gene=IY08_17465 | protein=formate dehydrogenase                   | protein_id=KGT43000.1 |
| gene | 3300951 | 3301439 | 284751 | 285239 | gene=IY08_17470 | protein=damage-inducible protein DinB           | protein_id=KGT43001.1 |
| gene | 3301553 | 3302029 | 285353 | 285829 | gene=IY08_17475 | protein=hypothetical protein                    | protein_id=KGT43002.1 |
| gene | 3302046 | 3302558 | 285846 | 286358 | gene=IY08_17480 | protein=hypothetical protein                    | protein_id=KGT43003.1 |
| gene | 3302861 | 3303754 | 286661 | 287554 | gene=IY08_17485 | protein=LysR family transcriptional regulator   | protein_id=KGT43004.1 |
| gene | 3303878 | 3304843 | 287678 | 288643 | gene=IY08_17490 | protein=alcohol dehydrogenase                   | protein_id=KGT43005.1 |
| gene | 3305116 | 3305631 | 288916 | 289431 | gene=IY08_17495 | protein=hypothetical protein                    | protein_id=KGT43006.1 |
| gene | 3305835 | 3306092 | 289635 | 289892 | gene=IY08_17500 | protein=hypothetical protein                    | protein_id=KGT43007.1 |
| gene | 3306561 | 3307271 | 290361 | 291071 | gene=IY08_17505 | protein=phosphoglycerate mutase                 | protein_id=KGT43008.1 |
| gene | 3307432 | 3307956 | 291232 | 291756 | gene=IY08_17510 | protein=GCN5 family acetyltransferase           | protein_id=KGT43009.1 |
| gene | 3307963 | 3309864 | 291763 | 293664 | gene=IY08_17515 | protein=mannonate oxidoreductase                | protein_id=KGT43010.1 |
| gene | 3310314 | 3311027 | 294114 | 294827 | gene=IY08_17520 | protein=hypothetical protein                    | protein_id=KGT43011.1 |
| gene | 3311499 | 3313040 | 295299 | 296840 | gene=IY08_17525 | protein=alpha-amylase                           | protein_id=KGT43012.1 |
| gene | 3313244 | 3314035 | 297044 | 297835 | gene=IY08_17530 | protein=N-hydroxyarylamine O-acetyltransferase  | protein_id=KGT43013.1 |
| gene | 3314153 | 3315940 | 297953 | 299740 | gene=IY08_17535 | protein=oligoendopeptidase F                    | protein_id=KGT43014.1 |
| gene | 3315987 | 3317033 | 299787 | 300833 | gene=IY08_17540 | protein=agmatine deiminase                      | protein_id=KGT43015.1 |
| gene | 3317221 | 3318042 | 301021 | 301842 | gene=IY08_17545 | protein=MerR family transcriptional regulator   | protein_id=KGT43016.1 |
| gene | 3318085 | 3319062 | 301885 | 302862 | gene=IY08_17550 | protein=peptidyl-arginine deiminase             | protein_id=KGT43017.1 |
| gene | 3319630 | 3320787 | 303430 | 304587 | gene=IY08_17560 | protein=agmatine deiminase                      | protein_id=KGT43018.1 |
| gene | 3321179 | 3322306 | 304979 | 306106 | gene=IY08_17565 | protein=penicillin-binding protein              | protein_id=KGT43019.1 |
| gene | 3322564 | 3322794 | 306364 | 306594 | gene=IY08_17570 | protein=hypothetical protein                    | protein_id=KGT43020.1 |
| gene | 3322905 | 3324127 | 306705 | 307927 | pseudo          |                                                 |                       |
| gene | 3324214 | 3325065 | 308014 | 308865 | gene=IY08_17580 | protein=LysR family transcriptional regulator   | protein_id=KGT43021.1 |
| gene | 3325058 | 3325567 | 308858 | 309367 | gene=IY08_17585 | protein=group-specific protein                  | protein_id=KGT43022.1 |
| gene | 3325606 | 3326550 | 309406 | 310350 | gene=IY08_17590 | protein=glycerophosphodiester phosphodiesterase | protein_id=KGT43023.1 |
| gene | 3326942 | 3328561 | 310742 | 312361 | gene=IY08_17595 | protein=FAD-binding monooxygenase               | protein_id=KGT43024.1 |
| gene | 3328849 | 3328980 | 312649 | 312780 | gene=IY08_17600 | protein=transcriptional regulator               | protein_id=KGT43025.1 |
| gene | 3329072 | 3329416 | 312872 | 313216 | gene=IY08_17605 | protein=ArsR family transcriptional regulator   | protein_id=KGT43026.1 |
| gene | 3329435 | 3330436 | 313235 | 314236 | gene=IY08_17610 | protein=NADPH:quinone reductase                 | protein_id=KGT43027.1 |
| gene | 3330613 | 3332079 | 314413 | 315879 | gene=IY08_17615 | protein=hypothetical protein                    | protein_id=KGT43028.1 |
| gene | 3332334 | 3333428 | 316134 | 317228 | gene=IY08_17620 | protein=histidine kinase                        | protein_id=KGT43029.1 |

|            |         |         |        |        |                 |                                                      |                       |
|------------|---------|---------|--------|--------|-----------------|------------------------------------------------------|-----------------------|
| gene       | 3333425 | 3333637 | 317225 | 317437 | gene=IY08_17625 | protein=hypothetical protein                         | protein_id=KGT43030.1 |
| gene       | 3333711 | 3334310 | 317511 | 318110 | gene=IY08_17630 | protein=transcriptional regulator                    | protein_id=KGT43031.1 |
| gene       | 3334452 | 3334979 | 318252 | 318779 | gene=IY08_17635 | protein=hypothetical protein                         | protein_id=KGT43032.1 |
| gene       | 3335003 | 3335350 | 318803 | 319150 | gene=IY08_17640 | protein=hypothetical protein                         | protein_id=KGT43033.1 |
| gene       | 3335541 | 3336932 | 319341 | 320732 | gene=IY08_17650 | protein=2-hydroxy-acid oxidase                       | protein_id=KGT43034.1 |
| gene       | 3337059 | 3337457 | 320859 | 321257 | gene=IY08_17655 | protein=membrane protein                             | protein_id=KGT43035.1 |
| gene       | 3337711 | 3338214 | 321511 | 322014 | gene=IY08_17660 | protein=alanine acetyltransferase                    | protein_id=KGT43036.1 |
| gene       | 3338418 | 3338600 | 322218 | 322400 | gene=IY08_17665 | protein=hypothetical protein                         | protein_id=KGT43037.1 |
| gene       | 3338805 | 3338987 | 322605 | 322787 | gene=IY08_17670 | protein=hypothetical protein                         | protein_id=KGT43038.1 |
| gene       | 3339489 | 3339980 | 323289 | 323780 | gene=IY08_17675 | protein=CDP-diacylglycerol--serine O-                | protein_id=KGT43039.1 |
| gene       | 3340363 | 3340548 | 324163 | 324348 | gene=IY08_17685 | protein=hypothetical protein                         | protein_id=KGT43040.1 |
| gene       | 3340598 | 3342034 | 324398 | 325834 | gene=IY08_17690 | protein=Zn-dependent hydrolase                       | protein_id=KGT43041.1 |
| gene       | 3342101 | 3343300 | 325901 | 327100 | gene=IY08_17695 | protein=pyridine nucleotide-disulfide oxidoreductase | protein_id=KGT43042.1 |
| gene       | 3343838 | 3344512 | 327638 | 328312 | gene=IY08_17700 | protein=hypothetical protein                         | protein_id=KGT43043.1 |
| gene       | 3345181 | 3345930 | 328981 | 329730 | gene=IY08_17705 | protein=glucose-1-phosphate cytidylyltransferase     | protein_id=KGT43044.1 |
| gene       | 3345951 | 3348020 | 329751 | 331820 | gene=IY08_17710 | protein=glycosyl transferase                         | protein_id=KGT43045.1 |
| gene       | 3348103 | 3349062 | 331903 | 332862 | gene=IY08_17715 | protein=CDP-abequose synthase                        | protein_id=KGT43046.1 |
| gene       | 3349091 | 3350179 | 332891 | 333979 | gene=IY08_17720 | protein=CDP-glucose 4,6-dehydratase                  | protein_id=KGT43047.1 |
| scaffold16 |         |         |        |        |                 |                                                      |                       |
| gene       | 3351001 | 3351576 | 1      | 576    | gene=IY08_17725 | protein=transposase                                  | protein_id=KGT42708.1 |
| gene       | 3352256 | 3353371 | 1256   | 2371   | gene=IY08_17730 | protein=histidine kinase                             | protein_id=KGT42709.1 |
| gene       | 3353371 | 3353532 | 2371   | 2532   | gene=IY08_17735 | protein=histidine kinase                             | protein_id=KGT42710.1 |
| gene       | 3353694 | 3355676 | 2694   | 4676   | gene=IY08_17740 | protein=chemotaxis protein                           | protein_id=KGT42711.1 |
| gene       | 3356485 | 3356763 | 5485   | 5763   | gene=IY08_17745 | protein=hypothetical protein                         | protein_id=KGT42712.1 |
| gene       | 3357311 | 3357685 | 6311   | 6685   | gene=IY08_17750 | protein=hypothetical protein                         | protein_id=KGT42713.1 |
| gene       | 3357946 | 3358281 | 6946   | 7281   | gene=IY08_17755 | protein=hypothetical protein                         | protein_id=KGT42714.1 |
| gene       | 3360439 | 3361707 | 9439   | 10707  | gene=IY08_17770 | protein=glycosyl hydrolase family 5                  | protein_id=KGT42715.1 |
| gene       | 3362220 | 3362693 | 11220  | 11693  | gene=IY08_17775 | protein=aspartate phosphatase                        | protein_id=KGT42716.1 |
| gene       | 3362845 | 3365574 | 11845  | 14574  | gene=IY08_17780 | protein=diguanylate cyclase                          | protein_id=KGT42717.1 |
| gene       | 3365986 | 3366198 | 14986  | 15198  | pseudo          |                                                      |                       |
| gene       | 3366592 | 3368070 | 15592  | 17070  | gene=IY08_17790 | protein=glycosyl transferase family 1                | protein_id=KGT42718.1 |

|      |         |         |       |       |                 |                                                   |                       |
|------|---------|---------|-------|-------|-----------------|---------------------------------------------------|-----------------------|
| gene | 3368223 | 3368504 | 17223 | 17504 | gene=IY08_17795 | protein=D-alanyl-D-alanine carboxypeptidase       | protein_id=KGT42719.1 |
| gene | 3368765 | 3369019 | 17765 | 18019 | gene=IY08_17800 | protein=hypothetical protein                      | protein_id=KGT42720.1 |
| gene | 3369098 | 3372379 | 18098 | 21379 | gene=IY08_17805 | protein=collagen-binding protein                  | protein_id=KGT42721.1 |
| gene | 3372951 | 3373304 | 21951 | 22304 | gene=IY08_17810 | protein=DNA mismatch repair protein MutT          | protein_id=KGT42722.1 |
| gene | 3373677 | 3374117 | 22677 | 23117 | gene=IY08_17815 | protein=hypothetical protein                      | protein_id=KGT42723.1 |
| gene | 3374751 | 3376004 | 23751 | 25004 | gene=IY08_17820 | protein=sporulation kinase                        | protein_id=KGT42724.1 |
| gene | 3376487 | 3379259 | 25487 | 28259 | gene=IY08_17825 | protein=collagenase                               | protein_id=KGT42587.1 |
| gene | 3379512 | 3380189 | 28512 | 29189 | gene=IY08_17830 | protein=methyltransferase                         | protein_id=KGT42588.1 |
| gene | 3380480 | 3380998 | 29480 | 29998 | gene=IY08_17835 | protein=GCN5 family acetyltransferase             | protein_id=KGT42589.1 |
| gene | 3381046 | 3381954 | 30046 | 30954 | gene=IY08_17840 | protein=glyoxalase                                | protein_id=KGT42590.1 |
| gene | 3382129 | 3383040 | 31129 | 32040 | gene=IY08_17845 | protein=vancomycin B-type resistance protein VanW | protein_id=KGT42591.1 |
| gene | 3383473 | 3383802 | 32473 | 32802 | gene=IY08_17850 | protein=hypothetical protein                      | protein_id=KGT42592.1 |
| gene | 3383918 | 3385009 | 32918 | 34009 | gene=IY08_17855 | protein=hypothetical protein                      | protein_id=KGT42593.1 |
| gene | 3385346 | 3385693 | 34346 | 34693 | gene=IY08_17860 | protein=hypothetical protein                      | protein_id=KGT42594.1 |
| gene | 3385724 | 3385882 | 34724 | 34882 | pseudo          |                                                   |                       |
| gene | 3386058 | 3386903 | 35058 | 35903 | gene=IY08_17870 | protein=exonuclease                               | protein_id=KGT42595.1 |
| gene | 3387092 | 3387292 | 36092 | 36292 | gene=IY08_17875 | protein=cold-shock protein                        | protein_id=KGT42596.1 |
| gene | 3387508 | 3388407 | 36508 | 37407 | gene=IY08_17880 | protein=BNR repeat-containing protein             | protein_id=KGT42597.1 |
| gene | 3388424 | 3388867 | 37424 | 37867 | gene=IY08_17885 | protein=flavodoxin                                | protein_id=KGT42598.1 |
| gene | 3389092 | 3389712 | 38092 | 38712 | gene=IY08_17890 | protein=membrane protein                          | protein_id=KGT42599.1 |
| gene | 3389799 | 3390194 | 38799 | 39194 | gene=IY08_17895 | protein=DNA mismatch repair protein MutT          | protein_id=KGT42600.1 |
| gene | 3390191 | 3390532 | 39191 | 39532 | gene=IY08_17900 | protein=cytoplasmic protein                       | protein_id=KGT42601.1 |
| gene | 3390643 | 3391200 | 39643 | 40200 | gene=IY08_17905 | protein=acetyltransferase                         | protein_id=KGT42602.1 |
| gene | 3391246 | 3398718 | 40246 | 47718 | gene=IY08_17910 | protein=reticulocyte-binding protein              | protein_id=KGT42603.1 |
| gene | 3398835 | 3399584 | 47835 | 48584 | gene=IY08_17915 | protein=short-chain dehydrogenase                 | protein_id=KGT42604.1 |
| gene | 3399620 | 3400453 | 48620 | 49453 | gene=IY08_17920 | protein=acetyltransferase                         | protein_id=KGT42605.1 |
| gene | 3400520 | 3402028 | 49520 | 51028 | gene=IY08_17925 | protein=argininosuccinate lyase                   | protein_id=KGT42606.1 |
| gene | 3402130 | 3403239 | 51130 | 52239 | gene=IY08_17930 | protein=D-alanyl-D-alanine carboxypeptidase       | protein_id=KGT42607.1 |
| gene | 3403355 | 3404287 | 52355 | 53287 | gene=IY08_17935 | protein=nucleoside hydrolase                      | protein_id=KGT42608.1 |
| gene | 3404411 | 3405844 | 53411 | 54844 | gene=panF       | protein=sodium/panthothenate symporter            | protein_id=KGT42609.1 |
| gene | 3405848 | 3406126 | 54848 | 55126 | gene=IY08_17945 | protein=sodium:pantothenate symporter             | protein_id=KGT42610.1 |

|      |         |         |       |       |                 |                                                          |                       |
|------|---------|---------|-------|-------|-----------------|----------------------------------------------------------|-----------------------|
| gene | 3406400 | 3407884 | 55400 | 56884 | gene=IY08_17950 | protein=betaine-aldehyde dehydrogenase                   | protein_id=KGT42611.1 |
| gene | 3407935 | 3408675 | 56935 | 57675 | gene=IY08_17955 | protein=3-ketoacyl-ACP reductase                         | protein_id=KGT42612.1 |
| gene | 3408961 | 3409110 | 57961 | 58110 | gene=IY08_17960 | protein=cytochrome C biosynthesis protein                | protein_id=KGT42613.1 |
| gene | 3409184 | 3411037 | 58184 | 60037 | gene=IY08_17965 | protein=squalene-hopene cyclase                          | protein_id=KGT42614.1 |
| gene | 3411137 | 3411562 | 60137 | 60562 | gene=IY08_17970 | protein=membrane protein                                 | protein_id=KGT42615.1 |
| gene | 3411642 | 3412583 | 60642 | 61583 | gene=IY08_17975 | protein=transporter                                      | protein_id=KGT42616.1 |
| gene | 3412676 | 3412924 | 61676 | 61924 | gene=IY08_17980 | protein=membrane protein                                 | protein_id=KGT42617.1 |
| gene | 3413108 | 3413506 | 62108 | 62506 | gene=IY08_17985 | protein=hypothetical protein                             | protein_id=KGT42618.1 |
| gene | 3413549 | 3413773 | 62549 | 62773 | gene=IY08_17990 | protein=group-specific protein                           | protein_id=KGT42619.1 |
| gene | 3413789 | 3414838 | 62789 | 63838 | gene=IY08_17995 | protein=ATP-binding protein                              | protein_id=KGT42620.1 |
| gene | 3414911 | 3415147 | 63911 | 64147 | gene=IY08_18000 | protein=molybdenum cofactor biosynthesis protein MoaD    | protein_id=KGT42621.1 |
| gene | 3415152 | 3415616 | 64152 | 64616 | gene=IY08_18005 | protein=molybdopterin (MPT) converting factor, subunit 2 | protein_id=KGT42622.1 |
| gene | 3415597 | 3416904 | 64597 | 65904 | gene=IY08_18010 | protein=molybdopterin molybdenumtransferase              | protein_id=KGT42623.1 |
| gene | 3416922 | 3417938 | 65922 | 66938 | gene=IY08_18015 | protein=thiamine biosynthesis protein MoeB               | protein_id=KGT42624.1 |
| gene | 3417963 | 3418742 | 66963 | 67742 | gene=IY08_18020 | protein=formate/nitrite transporter                      | protein_id=KGT42625.1 |
| gene | 3418935 | 3419951 | 67935 | 68951 | gene=IY08_18025 | protein=molybdenum cofactor biosynthesis protein A       | protein_id=KGT42626.1 |
| gene | 3419968 | 3420765 | 68968 | 69765 | gene=IY08_18030 | protein=formate dehydrogenase                            | protein_id=KGT42627.1 |
| gene | 3420782 | 3421126 | 69782 | 70126 | gene=IY08_18035 | protein=hypothetical protein                             | protein_id=KGT42628.1 |
| gene | 3421242 | 3421724 | 70242 | 70724 | gene=IY08_18040 | protein=hypothetical protein                             | protein_id=KGT42629.1 |
| gene | 3421737 | 3424676 | 70737 | 73676 | gene=IY08_18045 | protein=oxidoreductase                                   | protein_id=KGT42630.1 |
| gene | 3424669 | 3424835 | 73669 | 73835 | pseudo          |                                                          |                       |
| gene | 3424973 | 3426511 | 73973 | 75511 | gene=IY08_18055 | protein=spore germination protein                        | protein_id=KGT42631.1 |
| gene | 3426508 | 3427605 | 75508 | 76605 | gene=IY08_18060 | protein=spore germination protein                        | protein_id=KGT42632.1 |
| gene | 3427606 | 3428742 | 76606 | 77742 | gene=IY08_18065 | protein=spore germination protein                        | protein_id=KGT42633.1 |
| gene | 3428817 | 3430199 | 77817 | 79199 | gene=IY08_18070 | protein=amino acid permease                              | protein_id=KGT42634.1 |
| gene | 3430699 | 3430839 | 79699 | 79839 | gene=IY08_18075 | protein=phosphonate ABC transporter permease             | protein_id=KGT42635.1 |
| gene | 3430897 | 3434259 | 79897 | 83259 | gene=IY08_18080 | protein=phosphonate ABC transporter permease             | protein_id=KGT42636.1 |
| gene | 3434339 | 3436435 | 83339 | 85435 | gene=IY08_18085 | protein=membrane protein                                 | protein_id=KGT42637.1 |
| gene | 3436693 | 3437031 | 85693 | 86031 | gene=IY08_18090 | protein=glyoxalase                                       | protein_id=KGT42638.1 |
| gene | 3437256 | 3437591 | 86256 | 86591 | gene=IY08_18095 | protein=hypothetical protein                             | protein_id=KGT42639.1 |
| gene | 3437726 | 3438100 | 86726 | 87100 | gene=IY08_18100 | protein=keratin                                          | protein_id=KGT42640.1 |

|      |         |         |        |        |                 |                                                           |                       |
|------|---------|---------|--------|--------|-----------------|-----------------------------------------------------------|-----------------------|
| gene | 3438141 | 3438860 | 87141  | 87860  | gene=IY08_18105 | protein=methyltransferase                                 | protein_id=KGT42641.1 |
| gene | 3438943 | 3440637 | 87943  | 89637  | gene=IY08_18110 | protein=peptide ABC transporter substrate-binding protein | protein_id=KGT42642.1 |
| gene | 3441075 | 3442790 | 90075  | 91790  | gene=IY08_18115 | protein=peptide ABC transporter substrate-binding protein | protein_id=KGT42643.1 |
| gene | 3443101 | 3444804 | 92101  | 93804  | gene=IY08_18120 | protein=peptide ABC transporter substrate-binding protein | protein_id=KGT42644.1 |
| gene | 3445151 | 3446188 | 94151  | 95188  | gene=IY08_18125 | protein=LytR family transcriptional regulator             | protein_id=KGT42645.1 |
| gene | 3446206 | 3447204 | 95206  | 96204  | gene=IY08_18130 | protein=ECF-type sigma factor negative effector           | protein_id=KGT42646.1 |
| gene | 3447217 | 3447750 | 96217  | 96750  | gene=IY08_18135 | protein=RNA polymerase subunit sigma-24                   | protein_id=KGT42647.1 |
| gene | 3447951 | 3448757 | 96951  | 97757  | gene=IY08_18140 | protein=ABC transporter permease                          | protein_id=KGT42648.1 |
| gene | 3448750 | 3449643 | 97750  | 98643  | gene=IY08_18145 | protein=ABC transporter ATP-binding protein               | protein_id=KGT42649.1 |
| gene | 3449808 | 3450401 | 98808  | 99401  | gene=IY08_18150 | protein=TetR family transcriptional regulator             | protein_id=KGT42650.1 |
| gene | 3450426 | 3451457 | 99426  | 100457 | gene=IY08_18155 | protein=oxidoreductase                                    | protein_id=KGT42651.1 |
| gene | 3451728 | 3454151 | 100728 | 103151 | gene=IY08_18160 | protein=DNA gyrase subunit A                              | protein_id=KGT42652.1 |
| gene | 3454153 | 3456117 | 103153 | 105117 | gene=gyrB       | protein=DNA gyrase subunit B                              | protein_id=KGT42653.1 |
| gene | 3456240 | 3456455 | 105240 | 105455 | gene=IY08_18170 | protein=hypothetical protein                              | protein_id=KGT42654.1 |
| gene | 3456493 | 3456906 | 105493 | 105906 | gene=IY08_18175 | protein=CoA-binding protein                               | protein_id=KGT42655.1 |
| gene | 3456986 | 3458227 | 105986 | 107227 | gene=IY08_18180 | protein=serine protease                                   | protein_id=KGT42656.1 |
| gene | 3458431 | 3459108 | 107431 | 108108 | gene=IY08_18185 | protein=PhoB family transcriptional regulator             | protein_id=KGT42657.1 |
| gene | 3459127 | 3459579 | 108127 | 108579 | gene=IY08_18190 | protein=ribonucleoside-triphosphate reductase activating  | protein_id=KGT42658.1 |
| gene | 3459576 | 3461435 | 108576 | 110435 | gene=IY08_18195 | protein=ribonucleoside-triphosphate reductase             | protein_id=KGT42659.1 |
| gene | 3461661 | 3462257 | 110661 | 111257 | gene=IY08_18200 | protein=glycerol-3-phosphate acyltransferase              | protein_id=KGT42660.1 |
| gene | 3462366 | 3462656 | 111366 | 111656 | gene=IY08_18205 | protein=hypothetical protein                              | protein_id=KGT42661.1 |
| gene | 3462683 | 3463102 | 111683 | 112102 | gene=IY08_18210 | protein=hypothetical protein                              | protein_id=KGT42662.1 |
| gene | 3463214 | 3464506 | 112214 | 113506 | gene=IY08_18215 | protein=glycosyl hydrolase                                | protein_id=KGT42663.1 |
| gene | 3464535 | 3464732 | 113535 | 113732 | gene=IY08_18220 | protein=small acid-soluble spore protein Tlp              | protein_id=KGT42664.1 |
| gene | 3464832 | 3464966 | 113832 | 113966 | gene=sspN       | protein=acid-soluble spore protein N                      | protein_id=KGT42665.1 |
| gene | 3465010 | 3465153 | 114010 | 114153 | gene=IY08_18230 | protein=hypothetical protein                              | protein_id=KGT42666.1 |
| gene | 3465293 | 3466240 | 114293 | 115240 | gene=IY08_18235 | protein=DNA polymerase III subunit epsilon                | protein_id=KGT42667.1 |
| gene | 3466356 | 3466931 | 115356 | 115931 | gene=IY08_18240 | protein=thiol:disulfide interchange protein tlpA          | protein_id=KGT42668.1 |
| gene | 3467172 | 3467429 | 116172 | 116429 | gene=IY08_18245 | protein=hypothetical protein                              | protein_id=KGT42669.1 |
| gene | 3467453 | 3469101 | 116453 | 118101 | pseudo          |                                                           |                       |
| gene | 3469219 | 3471942 | 118219 | 120942 | gene=IY08_18255 | protein=aconitate hydratase                               | protein_id=KGT42670.1 |

|      |         |         |        |        |                 |                                              |                       |
|------|---------|---------|--------|--------|-----------------|----------------------------------------------|-----------------------|
| gene | 3472235 | 3472384 | 121235 | 121384 | gene=sspO       | protein=acid-soluble spore protein O         | protein_id=KGT42671.1 |
| gene | 3472426 | 3473067 | 121426 | 122067 | gene=IY08_18265 | protein=chitooligosaccharide deacetylase     | protein_id=KGT42672.1 |
| gene | 3473197 | 3473460 | 122197 | 122460 | gene=IY08_18270 | protein=hypothetical protein                 | protein_id=KGT42673.1 |
| gene | 3473582 | 3473704 | 122582 | 122704 | gene=IY08_18275 | protein=spore protein P                      | protein_id=KGT42674.1 |
| gene | 3473829 | 3474209 | 122829 | 123209 | gene=IY08_18280 | protein=spore coat protein                   | protein_id=KGT42675.1 |
| gene | 3474259 | 3475497 | 123259 | 124497 | gene=IY08_18285 | protein=MFS transporter                      | protein_id=KGT42676.1 |
| gene | 3475566 | 3475973 | 124566 | 124973 | gene=IY08_18290 | protein=hypothetical protein                 | protein_id=KGT42677.1 |
| gene | 3476075 | 3477310 | 125075 | 126310 | gene=IY08_18295 | protein=alanyl-tRNA synthetase               | protein_id=KGT42678.1 |
| gene | 3477355 | 3477798 | 126355 | 126798 | gene=IY08_18300 | protein=DNA mismatch repair protein MutT     | protein_id=KGT42679.1 |
| gene | 3477903 | 3478484 | 126903 | 127484 | gene=IY08_18305 | protein=cytoplasmic protein                  | protein_id=KGT42680.1 |
| gene | 3478495 | 3478719 | 127495 | 127719 | gene=IY08_18310 | protein=hypothetical protein                 | protein_id=KGT42681.1 |
| gene | 3478841 | 3479185 | 127841 | 128185 | gene=IY08_18315 | protein=hypothetical protein                 | protein_id=KGT42682.1 |
| gene | 3479298 | 3480389 | 128298 | 129389 | gene=IY08_18320 | protein=acetyl-CoA acetyltransferase         | protein_id=KGT42683.1 |
| gene | 3480382 | 3481845 | 129382 | 130845 | gene=IY08_18325 | protein=acyl-CoA synthetase                  | protein_id=KGT42684.1 |
| gene | 3481912 | 3482487 | 130912 | 131487 | gene=IY08_18330 | protein=biotin biosynthesis protein BioY     | protein_id=KGT42685.1 |
| gene | 3482611 | 3484224 | 131611 | 133224 | gene=IY08_18335 | protein=fatty-acid--CoA ligase               | protein_id=KGT42686.1 |
| gene | 3484393 | 3485181 | 133393 | 134181 | gene=IY08_18340 | protein=XRE family transcriptional regulator | protein_id=KGT42687.1 |
| gene | 3485204 | 3485413 | 134204 | 134413 | gene=IY08_18345 | protein=hypothetical protein                 | protein_id=KGT42688.1 |
| gene | 3485410 | 3485970 | 134410 | 134970 | gene=IY08_18350 | protein=alanine acetyltransferase            | protein_id=KGT42689.1 |
| gene | 3485967 | 3486170 | 134967 | 135170 | gene=IY08_18355 | protein=hypothetical protein                 | protein_id=KGT42690.1 |
| gene | 3486323 | 3487138 | 135323 | 136138 | gene=IY08_18360 | protein=acetyltransferase                    | protein_id=KGT42691.1 |
| gene | 3487310 | 3487522 | 136310 | 136522 | gene=IY08_18365 | protein=hypothetical protein                 | protein_id=KGT42692.1 |
| gene | 3487546 | 3487794 | 136546 | 136794 | gene=IY08_18370 | protein=hypothetical protein                 | protein_id=KGT42693.1 |
| gene | 3487814 | 3488266 | 136814 | 137266 | gene=IY08_18375 | protein=N-acetylmuramoyl-L-alanine amidase   | protein_id=KGT42694.1 |
| gene | 3488282 | 3489103 | 137282 | 138103 | gene=IY08_18380 | protein=serine/threonine protein phosphatase | protein_id=KGT42695.1 |
| gene | 3489230 | 3490039 | 138230 | 139039 | gene=IY08_18385 | protein=hypothetical protein                 | protein_id=KGT42696.1 |
| gene | 3490059 | 3490430 | 139059 | 139430 | gene=IY08_18390 | protein=glyoxalase                           | protein_id=KGT42697.1 |
| gene | 3490668 | 3492200 | 139668 | 141200 | gene=IY08_18395 | protein=histidine kinase                     | protein_id=KGT42698.1 |
| gene | 3492244 | 3492852 | 141244 | 141852 | gene=IY08_18400 | protein=carboxylesterase                     | protein_id=KGT42699.1 |
| gene | 3492877 | 3493815 | 141877 | 142815 | gene=IY08_18405 | protein=ring-cleaving dioxygenase            | protein_id=KGT42700.1 |
| gene | 3494167 | 3495645 | 143167 | 144645 | gene=IY08_18410 | protein=proline:sodium symporter PutP        | protein_id=KGT42701.1 |



|      |         |         |        |        |                 |                                                                                   |                        |
|------|---------|---------|--------|--------|-----------------|-----------------------------------------------------------------------------------|------------------------|
| gene | 3495944 | 3496432 | 144944 | 145432 | gene=IY08_18415 | protein=cobalamin biosynthesis protein CbiX                                       | protein_id=KGT42702.1  |
| gene | 3496544 | 3498118 | 145544 | 147118 | gene=IY08_18420 | protein=glutamate synthase                                                        | protein_id=KGT42703.1  |
| gene | 3498186 | 3499313 | 147186 | 148313 | gene=IY08_18425 | protein=oxidoreductase                                                            | protein_id=KGT42704.1  |
| gene | 3499875 | 3500351 | 148875 | 149351 | gene=IY08_18430 | protein=transcription factor YdeB                                                 | protein_id=KGT42705.1  |
| gene | 3500593 | 3501564 | 149593 | 150564 | gene=IY08_18435 | protein=formimidoylglutamase                                                      | protein_id=KGT42706.1  |
| gene | 3501543 | 3502605 | 150543 | 151605 | gene=IY08_18440 | protein=imidazolonepropionase                                                     | protein_id=KGT42707.1] |
| gene | 3502838 | 3504496 | 151838 | 153496 | gene=IY08_18450 | protein=uroporphobilinogen hydratase                                              | protein_id=KGT42536.1  |
| gene | 3504520 | 3506037 | 153520 | 155037 | gene=IY08_18455 | protein=histidine ammonia-lyase                                                   | protein_id=KGT42537.1  |
| gene | 3506141 | 3506581 | 155141 | 155581 | gene=hutP       | protein=anti-terminator HutP                                                      | protein_id=KGT42538.1  |
| gene | 3506778 | 3507725 | 155778 | 156725 | gene=IY08_18465 | protein=methyltransferase                                                         | protein_id=KGT42539.1  |
| gene | 3507739 | 3508311 | 156739 | 157311 | gene=IY08_18470 | protein=4-methyl-5(B-hydroxyethyl)-thiazole<br>monophosphate biosynthesis protein | protein_id=KGT42540.1  |
| gene | 3508308 | 3508895 | 157308 | 157895 | gene=IY08_18475 | protein=ATP-binding protein                                                       | protein_id=KGT42541.1  |
| gene | 3508849 | 3509043 | 157849 | 158043 | pseudo          |                                                                                   |                        |
| gene | 3509141 | 3509437 | 158141 | 158437 | gene=IY08_18485 | protein=hypothetical protein                                                      | protein_id=KGT42542.1  |
| gene | 3509541 | 3509972 | 158541 | 158972 | gene=IY08_18490 | protein=hypothetical protein                                                      | protein_id=KGT42543.1  |
| gene | 3510043 | 3510549 | 159043 | 159549 | gene=IY08_18495 | protein=membrane protein                                                          | protein_id=KGT42544.1  |
| gene | 3510640 | 3511347 | 159640 | 160347 | gene=IY08_18500 | protein=cytochrome C biogenesis protein                                           | protein_id=KGT42545.1  |
| gene | 3511836 | 3512744 | 160836 | 161744 | gene=IY08_18510 | protein=multidrug transporter                                                     | protein_id=KGT42546.1  |
| gene | 3512877 | 3514022 | 161877 | 163022 | gene=IY08_18515 | protein=hydrolase                                                                 | protein_id=KGT42547.1  |
| gene | 3514070 | 3515014 | 163070 | 164014 | gene=IY08_18520 | protein=bacitracin ABC transporter permease                                       | protein_id=KGT42548.1  |
| gene | 3515007 | 3515918 | 164007 | 164918 | gene=IY08_18525 | protein=ABC transporter ATP-binding protein                                       | protein_id=KGT42549.1  |
| gene | 3516009 | 3516584 | 165009 | 165584 | gene=IY08_18530 | protein=ABC transporter permease                                                  | protein_id=KGT42550.1  |
| gene | 3516754 | 3517353 | 165754 | 166353 | gene=IY08_18535 | protein=histidine kinase                                                          | protein_id=KGT42551.1  |
| gene | 3517444 | 3518346 | 166444 | 167346 | gene=IY08_18540 | protein=LysR family transcriptional regulator                                     | protein_id=KGT42552.1  |
| gene | 3518500 | 3518865 | 167500 | 167865 | gene=IY08_18545 | protein=holin                                                                     | protein_id=KGT42553.1  |
| gene | 3518862 | 3519539 | 167862 | 168539 | gene=IY08_18550 | protein=murein hydrolase export regulator                                         | protein_id=KGT42554.1  |
| gene | 3519552 | 3519965 | 168552 | 168965 | gene=IY08_18555 | protein=DNA mismatch repair protein MutT                                          | protein_id=KGT42555.1  |
| gene | 3520107 | 3520307 | 169107 | 169307 | gene=IY08_18560 | protein=hypothetical protein                                                      | protein_id=KGT42556.1  |
| gene | 3520675 | 3521430 | 169675 | 170430 | gene=IY08_18565 | protein=membrane protein                                                          | protein_id=KGT42557.1  |
| gene | 3521529 | 3521675 | 170529 | 170675 | gene=IY08_18570 | protein=phage protein                                                             | protein_id=KGT42558.1  |

|            |         |         |        |        |                 |                                                         |                        |
|------------|---------|---------|--------|--------|-----------------|---------------------------------------------------------|------------------------|
| gene       | 3521915 | 3522463 | 170915 | 171463 | gene=IY08_18575 | protein=hypothetical protein                            | protein_id=KGT42559.1  |
| gene       | 3522487 | 3523506 | 171487 | 172506 | gene=IY08_18580 | protein=chromosome segregation protein                  | protein_id=KGT42560.1  |
| gene       | 3523797 | 3524843 | 172797 | 173843 | gene=IY08_18585 | protein=N-acetylmuramoyl-L-alanine amidase              | protein_id=KGT42561.1  |
| gene       | 3524976 | 3526739 | 173976 | 175739 | gene=IY08_18590 | protein=multidrug ABC transporter ATP-binding protein   | protein_id=KGT42562.1  |
| gene       | 3526739 | 3528490 | 175739 | 177490 | gene=IY08_18595 | protein=ABC transporter ATP-binding protein             | protein_id=KGT42563.1  |
| gene       | 3528613 | 3528834 | 177613 | 177834 | gene=IY08_18600 | protein=hypothetical protein                            | protein_id=KGT42564.1  |
| gene       | 3528913 | 3529353 | 177913 | 178353 | gene=IY08_18605 | protein=1-phosphatidylinositol phosphodiesterase        | protein_id=KGT42565.1  |
| gene       | 3529510 | 3531510 | 178510 | 180510 | gene=IY08_18610 | protein=transketolase                                   | protein_id=KGT42566.1  |
| gene       | 3531795 | 3532598 | 180795 | 181598 | gene=IY08_18615 | protein=phosphate ABC transporter permease              | protein_id=KGT42567.1  |
| gene       | 3532598 | 3533392 | 181598 | 182392 | gene=IY08_18620 | protein=phosphate ABC transporter permease              | protein_id=KGT42568.1  |
| gene       | 3533389 | 3534162 | 182389 | 183162 | gene=IY08_18625 | protein=phosphonate ABC transporter ATP-binding protein | protein_id=KGT42569.1  |
| gene       | 3534246 | 3535184 | 183246 | 184184 | gene=IY08_18630 | protein=phosphonate-binding protein                     | protein_id=KGT42570.1  |
| gene       | 3535371 | 3536954 | 184371 | 185954 | gene=IY08_18635 | protein=2', 3'-cyclic nucleotide 2'-phosphodiesterase   | protein_id=KGT42571.1  |
| gene       | 3536994 | 3537233 | 185994 | 186233 | gene=IY08_18640 | protein=hypothetical protein                            | protein_id=KGT42572.1  |
| gene       | 3537279 | 3537935 | 186279 | 186935 | gene=IY08_18645 | protein=resolvase                                       | protein_id=KGT42573.1  |
| gene       | 3538077 | 3538697 | 187077 | 187697 | gene=IY08_18650 | protein=LexA family transcriptional regulator           | protein_id=KGT42574.1  |
| gene       | 3538790 | 3539593 | 187790 | 188593 | gene=IY08_18655 | protein=GNAT family acetyltransferase                   | protein_id=KGT42575.1  |
| gene       | 3539594 | 3540136 | 188594 | 189136 | gene=IY08_18660 | protein=hypothetical protein                            | protein_id=KGT42576.1  |
| gene       | 3540129 | 3540452 | 189129 | 189452 | gene=IY08_18665 | protein=PadR family transcriptional regulator           | protein_id=KGT42577.1  |
| gene       | 3541071 | 3542405 | 190071 | 191405 | gene=IY08_18670 | protein=glutamine synthetase                            | protein_id=KGT42578.1  |
| gene       | 3542454 | 3542843 | 191454 | 191843 | gene=IY08_18675 | protein=transcriptional regulator                       | protein_id=KGT42579.1  |
| gene       | 3543017 | 3544288 | 192017 | 193288 | gene=IY08_18680 | protein=hypothetical protein                            | protein_id=KGT42580.1  |
| gene       | 3544281 | 3545555 | 193281 | 194555 | gene=IY08_18685 | protein=GTPase                                          | protein_id=KGT42581.1  |
| gene       | 3545648 | 3546271 | 194648 | 195271 | gene=IY08_18690 | protein=membrane protein                                | protein_id=KGT42582.1  |
| gene       | 3546371 | 3546508 | 195371 | 195508 | gene=IY08_18695 | protein=hypothetical protein                            | protein_id=KGT42583.1  |
| gene       | 3546540 | 3547496 | 195540 | 196496 | gene=IY08_18700 | protein=stage V sporulation protein K                   | protein_id=KGT42584.1  |
| gene       | 3547761 | 3548726 | 196761 | 197726 | gene=IY08_18705 | protein=integrase                                       | protein_id=KGT42585.1  |
| gene       | 3548840 | 3549830 | 197840 | 198830 | gene=IY08_18710 | protein=hypothetical protein                            | protein_id=KGT42586.1  |
| scaffold17 |         |         |        |        |                 |                                                         |                        |
| gene       | 3549841 | 3550561 | 1      | 721    | gene=IY08_18715 | protein=hypothetical protein                            | protein_id=KGT42385.1] |
| gene       | 3550642 | 3550866 | 802    | 1026   | gene=IY08_18720 | protein=RNA-binding protein Hfq                         | protein_id=KGT42386.1  |

|      |         |         |       |       |                 |                                                      |                       |
|------|---------|---------|-------|-------|-----------------|------------------------------------------------------|-----------------------|
| gene | 3550888 | 3551841 | 1048  | 2001  | gene=IY08_18725 | protein=tRNA delta(2)-isopentenylpyrophosphate       | protein_id=KGT42387.1 |
| gene | 3552022 | 3552267 | 2182  | 2427  | gene=IY08_18730 | protein=hypothetical protein                         | protein_id=KGT42388.1 |
| gene | 3552330 | 3553280 | 2490  | 3440  | gene=IY08_18735 | protein=enterotoxin                                  | protein_id=KGT42389.1 |
| gene | 3553630 | 3555486 | 3790  | 5646  | gene=IY08_18740 | protein=PTS fructose transporter subunit IIC         | protein_id=KGT42390.1 |
| gene | 3555500 | 3556411 | 5660  | 6571  | gene=IY08_18745 | protein=phosphofructokinase                          | protein_id=KGT42391.1 |
| gene | 3556408 | 3557160 | 6568  | 7320  | gene=IY08_18750 | protein=DeoR family transcriptional regulator        | protein_id=KGT42392.1 |
| gene | 3557318 | 3558481 | 7478  | 8641  | gene=IY08_18755 | protein=butanol dehydrogenase                        | protein_id=KGT42393.1 |
| gene | 3558598 | 3559140 | 8758  | 9300  | gene=IY08_18760 | protein=membrane protein                             | protein_id=KGT42394.1 |
| gene | 3559317 | 3559433 | 9477  | 9593  | gene=IY08_18765 | protein=hypothetical protein                         | protein_id=KGT42395.1 |
| gene | 3559458 | 3559769 | 9618  | 9929  | gene=IY08_18770 | protein=hypothetical protein                         | protein_id=KGT42396.1 |
| gene | 3559940 | 3561334 | 10100 | 11494 | gene=IY08_18775 | protein=GABA permease                                | protein_id=KGT42397.1 |
| gene | 3561606 | 3562688 | 11766 | 12848 | gene=IY08_18780 | protein=chitinase                                    | protein_id=KGT42398.1 |
| gene | 3562888 | 3563781 | 13048 | 13941 | gene=IY08_18790 | protein=metallophosphoesterase                       | protein_id=KGT42399.1 |
| gene | 3563975 | 3564790 | 14135 | 14950 | gene=IY08_18795 | protein=formate/nitrite transporter                  | protein_id=KGT42400.1 |
| gene | 3564930 | 3565202 | 15090 | 15362 | gene=IY08_18800 | protein=DNA-binding protein                          | protein_id=KGT42401.1 |
| gene | 3565222 | 3565701 | 15382 | 15861 | gene=IY08_18805 | protein=acetyltransferase                            | protein_id=KGT42402.1 |
| gene | 3565858 | 3568278 | 16018 | 18438 | gene=IY08_18810 | protein=ATPase P                                     | protein_id=KGT42403.1 |
| gene | 3568374 | 3568580 | 18534 | 18740 | gene=IY08_18815 | protein=copper resistance protein CopZ               | protein_id=KGT42404.1 |
| gene | 3568785 | 3569087 | 18945 | 19247 | gene=IY08_18820 | protein=transcriptional regulator                    | protein_id=KGT42405.1 |
| gene | 3569485 | 3570291 | 19645 | 20451 | gene=IY08_18830 | protein=methionine ABC transporter substrate-binding | protein_id=KGT42406.1 |
| gene | 3570844 | 3571071 | 21004 | 21231 | gene=IY08_18835 | protein=hypothetical protein                         | protein_id=KGT42407.1 |
| gene | 3571320 | 3572138 | 21480 | 22298 | gene=IY08_18840 | protein=IroE protein                                 | protein_id=KGT42408.1 |
| gene | 3572154 | 3572975 | 22314 | 23135 | gene=IY08_18845 | protein=ABC transporter ATP-binding protein          | protein_id=KGT42409.1 |
| gene | 3572990 | 3574012 | 23150 | 24172 | gene=IY08_18850 | protein=iron ABC transporter permease                | protein_id=KGT42410.1 |
| gene | 3574005 | 3575012 | 24165 | 25172 | gene=IY08_18855 | protein=ferrichrome ABC transporter permease         | protein_id=KGT42411.1 |
| gene | 3575040 | 3576005 | 25200 | 26165 | gene=IY08_18860 | protein=iron-uptake system-binding protein           | protein_id=KGT42412.1 |
| gene | 3576307 | 3577065 | 26467 | 27225 | gene=IY08_18865 | protein=exodeoxyribonuclease III                     | protein_id=KGT42413.1 |
| gene | 3577220 | 3577816 | 27380 | 27976 | gene=IY08_18870 | protein=AraC family transcriptional regulator        | protein_id=KGT42414.1 |
| gene | 3577797 | 3578327 | 27957 | 28487 | gene=IY08_18875 | protein=cysteine methyltransferase                   | protein_id=KGT42415.1 |
| gene | 3578324 | 3579235 | 28484 | 29395 | gene=IY08_18880 | protein=DNA-3-methyladenine glycosylase              | protein_id=KGT42416.1 |
| gene | 3579274 | 3580506 | 29434 | 30666 | gene=IY08_18885 | protein=peptidase T                                  | protein_id=KGT42417.1 |

|      |         |         |       |       |                 |                                                                                 |                       |
|------|---------|---------|-------|-------|-----------------|---------------------------------------------------------------------------------|-----------------------|
| gene | 3580703 | 3581341 | 30863 | 31501 | gene=IY08_18890 | protein=membrane protein                                                        | protein_id=KGT42418.1 |
| gene | 3581434 | 3581751 | 31594 | 31911 | gene=IY08_18895 | protein=hypothetical protein                                                    | protein_id=KGT42419.1 |
| gene | 3582073 | 3582648 | 32233 | 32808 | gene=IY08_18900 | protein=phosphoglycerate mutase                                                 | protein_id=KGT42420.1 |
| gene | 3582789 | 3583604 | 32949 | 33764 | gene=IY08_18905 | protein=2-hydroxy-6-oxo-6-phenylhexa-2,4-dienoate                               | protein_id=KGT42421.1 |
| gene | 3584013 | 3586733 | 34173 | 36893 | gene=IY08_18910 | protein=diguanylate cyclase                                                     | protein_id=KGT42422.1 |
| gene | 3586829 | 3587893 | 36989 | 38053 | gene=IY08_18915 | protein=UDP-diphospho-muramoylpentapeptide beta-N-acetylglucosaminyltransferase | protein_id=KGT42423.1 |
| gene | 3587942 | 3588262 | 38102 | 38422 | gene=IY08_18920 | protein=hypothetical protein                                                    | protein_id=KGT42424.1 |
| gene | 3588289 | 3589200 | 38449 | 39360 | gene=IY08_18925 | protein=UDP-2-acetamido-2,6-dideoxy-hexulose 4-                                 | protein_id=KGT42425.1 |
| gene | 3589197 | 3590183 | 39357 | 40343 | gene=IY08_18930 | protein=UDP-N-acetylglucosamine 4,6-dehydratase                                 | protein_id=KGT42426.1 |
| gene | 3590485 | 3591663 | 40645 | 41823 | gene=IY08_18935 | protein=hypothetical protein                                                    | protein_id=KGT42427.1 |
| gene | 3591638 | 3592039 | 41798 | 42199 | gene=IY08_18940 | protein=hypothetical protein                                                    | protein_id=KGT42428.1 |
| gene | 3592062 | 3592487 | 42222 | 42647 | gene=IY08_18945 | protein=hypothetical protein                                                    | protein_id=KGT42429.1 |
| gene | 3592508 | 3593179 | 42668 | 43339 | gene=IY08_18950 | protein=hypothetical protein                                                    | protein_id=KGT42430.1 |
| gene | 3593203 | 3593559 | 43363 | 43719 | gene=IY08_18955 | protein=holin                                                                   | protein_id=KGT42431.1 |
| gene | 3593593 | 3595026 | 43753 | 45186 | gene=IY08_18960 | protein=GntR family transcriptional regulator                                   | protein_id=KGT42432.1 |
| gene | 3595213 | 3595404 | 45373 | 45564 | gene=IY08_18965 | protein=hypothetical protein                                                    | protein_id=KGT42433.1 |
| gene | 3595624 | 3596331 | 45784 | 46491 | gene=IY08_18975 | protein=GntR family transcriptional regulator                                   | protein_id=KGT42434.1 |
| gene | 3596362 | 3597771 | 46522 | 47931 | gene=IY08_18980 | protein=aryl-phospho-beta-D-glucosidase                                         | protein_id=KGT42435.1 |
| gene | 3597963 | 3598952 | 48123 | 49112 | gene=IY08_18985 | protein=1-phosphatidylinositol phosphodiesterase                                | protein_id=KGT42436.1 |
| gene | 3599132 | 3600973 | 49292 | 51133 | gene=IY08_18990 | protein=collagenase                                                             | protein_id=KGT42437.1 |
| gene | 3601265 | 3602062 | 51425 | 52222 | gene=IY08_18995 | protein=peptidoglycan-binding protein LysM                                      | protein_id=KGT42438.1 |
| gene | 3602328 | 3603665 | 52488 | 53825 | gene=IY08_19000 | protein=NAD(FAD)-utilizing dehydrogenase                                        | protein_id=KGT42439.1 |
| gene | 3604169 | 3606088 | 54329 | 56248 | gene=IY08_19005 | protein=hypothetical protein                                                    | protein_id=KGT42440.1 |
| gene | 3606135 | 3608918 | 56295 | 59078 | gene=IY08_19010 | protein=GTP-binding protein                                                     | protein_id=KGT42441.1 |
| gene | 3609423 | 3609608 | 59583 | 59768 | gene=IY08_19015 | protein=hypothetical protein                                                    | protein_id=KGT42442.1 |
| gene | 3609872 | 3611815 | 60032 | 61975 | gene=IY08_19020 | protein=DNA mismatch repair protein MutL                                        | protein_id=KGT42443.1 |
| gene | 3611824 | 3614496 | 61984 | 64656 | gene=IY08_19025 | protein=DNA mismatch repair protein MutS                                        | protein_id=KGT42444.1 |
| gene | 3614677 | 3615219 | 64837 | 65379 | gene=IY08_19030 | protein=spore coat protein                                                      | protein_id=KGT42445.1 |
| gene | 3615345 | 3615776 | 65505 | 65936 | gene=IY08_19035 | protein=master regulator for biofilm formation                                  | protein_id=KGT42446.1 |
| gene | 3615780 | 3617309 | 65940 | 67469 | gene=IY08_19040 | protein=dimethylallyladenosine tRNA                                             | protein_id=KGT42447.1 |

|      |         |         |        |        |                 |                                                                            |                       |
|------|---------|---------|--------|--------|-----------------|----------------------------------------------------------------------------|-----------------------|
| gene | 3617739 | 3618605 | 67899  | 68765  | gene=IY08_19045 | protein=2-oxoacid ferredoxin oxidoreductase                                | protein_id=KGT42448.1 |
| gene | 3618592 | 3620349 | 68752  | 70509  | gene=IY08_19050 | protein=2-oxoglutarate ferredoxin oxidoreductase subunit                   | protein_id=KGT42449.1 |
| gene | 3620574 | 3621497 | 70734  | 71657  | gene=IY08_19055 | protein=diguanylate cyclase                                                | protein_id=KGT42450.1 |
| gene | 3621556 | 3621816 | 71716  | 71976  | gene=IY08_19060 | protein=stage V sporulation protein S                                      | protein_id=KGT42451.1 |
| gene | 3621966 | 3622760 | 72126  | 72920  | gene=IY08_19065 | protein=metallophosphoesterase                                             | protein_id=KGT42452.1 |
| gene | 3622923 | 3624488 | 73083  | 74648  | gene=IY08_19070 | protein=ribonuclease                                                       | protein_id=KGT42453.1 |
| gene | 3624969 | 3625475 | 75129  | 75635  | pseudo          |                                                                            |                       |
| gene | 3625660 | 3626283 | 75820  | 76443  | gene=IY08_19080 | protein=topoisomerase I                                                    | protein_id=KGT42454.1 |
| gene | 3627134 | 3628372 | 77294  | 78532  | gene=IY08_19090 | protein=damage-inducible protein CinA                                      | protein_id=KGT42455.1 |
| gene | 3628393 | 3628971 | 78553  | 79131  | gene=IY08_19095 | protein=CDP-diacylglycerol--glycerol-3-phosphate 3-phosphatidyltransferase | protein_id=KGT42456.1 |
| gene | 3629036 | 3629947 | 79196  | 80107  | gene=IY08_19100 | protein=transcriptional regulator                                          | protein_id=KGT42457.1 |
| gene | 3629969 | 3630754 | 80129  | 80914  | gene=IY08_19105 | protein=hypothetical protein                                               | protein_id=KGT42458.1 |
| gene | 3630893 | 3631141 | 81053  | 81301  | gene=IY08_19110 | protein=hypothetical protein                                               | protein_id=KGT42459.1 |
| gene | 3631217 | 3631930 | 81377  | 82090  | gene=IY08_19115 | protein=3-ketoacyl-ACP reductase                                           | protein_id=KGT42460.1 |
| gene | 3632031 | 3633317 | 82191  | 83477  | gene=IY08_19120 | protein=zinc protease                                                      | protein_id=KGT42461.1 |
| gene | 3633318 | 3634592 | 83478  | 84752  | gene=IY08_19125 | protein=zinc protease                                                      | protein_id=KGT42462.1 |
| gene | 3634802 | 3635761 | 84962  | 85921  | gene=IY08_19130 | protein=sugar ABC transporter permease                                     | protein_id=KGT42463.1 |
| gene | 3635762 | 3636820 | 85922  | 86980  | gene=IY08_19135 | protein=sugar ABC transporter permease                                     | protein_id=KGT42464.1 |
| gene | 3636813 | 3638345 | 86973  | 88505  | gene=IY08_19140 | protein=heme ABC transporter ATP-binding protein                           | protein_id=KGT42465.1 |
| gene | 3638463 | 3639548 | 88623  | 89708  | gene=IY08_19145 | protein=CD4+ T-cell-stimulating antigen                                    | protein_id=KGT42466.1 |
| gene | 3639641 | 3640366 | 89801  | 90526  | gene=IY08_19150 | protein=GntR family transcriptional regulator                              | protein_id=KGT42467.1 |
| gene | 3640904 | 3643285 | 91064  | 93445  | gene=IY08_19155 | protein=cell division protein FtsK                                         | protein_id=KGT42468.1 |
| gene | 3643498 | 3643701 | 93658  | 93861  | gene=IY08_19160 | protein=ribonuclease                                                       | protein_id=KGT42469.1 |
| gene | 3643698 | 3644447 | 93858  | 94607  | gene=IY08_19165 | protein=translocation-enhancing protein TepA                               | protein_id=KGT42470.1 |
| gene | 3644549 | 3646219 | 94709  | 96379  | gene=IY08_19170 | protein=Zn-dependent hydrolase                                             | protein_id=KGT42471.1 |
| gene | 3646724 | 3646928 | 96884  | 97088  | pseudo          |                                                                            |                       |
| gene | 3646956 | 3647834 | 97116  | 97994  | gene=IY08_19180 | protein=dihydrodipicolinate synthase                                       | protein_id=KGT42472.1 |
| gene | 3647846 | 3649078 | 98006  | 99238  | gene=IY08_19185 | protein=aspartate kinase                                                   | protein_id=KGT42473.1 |
| gene | 3649102 | 3650148 | 99262  | 100308 | gene=IY08_19190 | protein=aspartate-semialdehyde dehydrogenase                               | protein_id=KGT42474.1 |
| gene | 3650299 | 3650898 | 100459 | 101058 | gene=spoVFB     | protein=dipicolinate synthase subunit B                                    | protein_id=KGT42475.1 |

|      |         |         |        |        |                 |                                                         |                       |
|------|---------|---------|--------|--------|-----------------|---------------------------------------------------------|-----------------------|
| gene | 3650895 | 3651797 | 101055 | 101957 | gene=IY08_19200 | protein=dipicolinate synthase subunit A                 | protein_id=KGT42476.1 |
| gene | 3651968 | 3652219 | 102128 | 102379 | gene=IY08_19205 | protein=hypothetical protein                            | protein_id=KGT42477.1 |
| gene | 3652354 | 3653595 | 102514 | 103755 | gene=IY08_19210 | protein=zinc protease                                   | protein_id=KGT42478.1 |
| gene | 3653682 | 3654581 | 103842 | 104741 | gene=IY08_19215 | protein=hypothetical protein                            | protein_id=KGT42479.1 |
| gene | 3654736 | 3656874 | 104896 | 107034 | gene=IY08_19220 | protein=polynucleotide phosphorylase                    | protein_id=KGT42480.1 |
| gene | 3657035 | 3657304 | 107195 | 107464 | gene=IY08_19225 | protein=30S ribosomal protein S15                       | protein_id=KGT42481.1 |
| gene | 3657405 | 3658376 | 107565 | 108536 | gene=IY08_19230 | protein=riboflavin biosynthesis protein RibF            | protein_id=KGT42482.1 |
| gene | 3658420 | 3659343 | 108580 | 109503 | gene=truB       | protein=tRNA pseudouridine synthase B                   | protein_id=KGT42483.1 |
| gene | 3659430 | 3659786 | 109590 | 109946 | gene=IY08_19240 | protein=ribosome-binding factor A                       | protein_id=KGT42484.1 |
| gene | 3659802 | 3660083 | 109962 | 110243 | gene=IY08_19245 | protein=hypothetical protein                            | protein_id=KGT42485.1 |
| gene | 3660080 | 3662140 | 110240 | 112300 | gene=IY08_19250 | protein=translation initiation factor IF-2              | protein_id=KGT42486.1 |
| gene | 3662145 | 3662456 | 112305 | 112616 | gene=IY08_19255 | protein=50S ribosomal protein L7                        | protein_id=KGT42487.1 |
| gene | 3662457 | 3662729 | 112617 | 112889 | gene=IY08_19260 | protein=RNA-binding protein                             | protein_id=KGT42488.1 |
| gene | 3662741 | 3663847 | 112901 | 114007 | gene=nusA       | protein=transcription elongation factor NusA            | protein_id=KGT42489.1 |
| gene | 3663865 | 3664335 | 114025 | 114495 | gene=IY08_19270 | protein=ribosome maturation protein RimP                | protein_id=KGT42490.1 |
| gene | 3664672 | 3668973 | 114832 | 119133 | gene=polC       | protein=DNA polymerase III PolC                         | protein_id=KGT42491.1 |
| gene | 3669098 | 3670798 | 119258 | 120958 | gene=IY08_19280 | protein=prolyl-tRNA synthetase                          | protein_id=KGT42492.1 |
| gene | 3670908 | 3672164 | 121068 | 122324 | gene=IY08_19285 | protein=zinc metalloprotease                            | protein_id=KGT42493.1 |
| gene | 3672182 | 3673324 | 122342 | 123484 | gene=IY08_19290 | protein=l-deoxy-D-xylulose 5-phosphate reductoisomerase | protein_id=KGT42494.1 |
| gene | 3673348 | 3674139 | 123508 | 124299 | gene=IY08_19295 | protein=phosphatidate cytidyltransferase                | protein_id=KGT42495.1 |
| gene | 3674157 | 3674933 | 124317 | 125093 | gene=IY08_19300 | protein=UDP pyrophosphate synthase                      | protein_id=KGT42496.1 |
| gene | 3675019 | 3675576 | 125179 | 125736 | gene=IY08_19305 | protein=ribosome recycling factor                       | protein_id=KGT42497.1 |
| gene | 3675579 | 3676301 | 125739 | 126461 | gene=pyrH       | protein=uridylate kinase                                | protein_id=KGT42498.1 |
| gene | 3676368 | 3677255 | 126528 | 127415 | gene=IY08_19315 | protein=elongation factor Ts                            | protein_id=KGT42499.1 |
| gene | 3677359 | 3678060 | 127519 | 128220 | gene=IY08_19320 | protein=30S ribosomal protein S2                        | protein_id=KGT42500.1 |
| gene | 3678409 | 3679188 | 128569 | 129348 | gene=IY08_19325 | protein=transcriptional repressor CodY                  | protein_id=KGT42501.1 |
| gene | 3679266 | 3680657 | 129426 | 130817 | gene=IY08_19330 | protein=Clp protease ATPase                             | protein_id=KGT42502.1 |
| gene | 3680680 | 3681222 | 130840 | 131382 | gene=IY08_19335 | protein=ATP-dependent protease subunit HslV             | protein_id=KGT42503.1 |
| gene | 3681265 | 3682164 | 131425 | 132324 | gene=IY08_19340 | protein=recombinase XerC                                | protein_id=KGT42504.1 |
| gene | 3682230 | 3683534 | 132390 | 133694 | gene=gid        | protein=tRNA (uracil-5-)-methyltransferase              | protein_id=KGT42505.1 |
| gene | 3683588 | 3685666 | 133748 | 135826 | gene=IY08_19350 | protein=DNA topoisomerase I                             | protein_id=KGT42506.1 |

|      |         |         |        |        |                 |                                                           |                       |
|------|---------|---------|--------|--------|-----------------|-----------------------------------------------------------|-----------------------|
| gene | 3685811 | 3686680 | 135971 | 136840 | gene=IY08_19355 | protein=DNA-binding protein                               | protein_id=KGT42507.1 |
| gene | 3686769 | 3687671 | 136929 | 137831 | gene=IY08_19360 | protein=succinyl-CoA synthetase subunit alpha             | protein_id=KGT42508.1 |
| gene | 3687691 | 3688851 | 137851 | 139011 | gene=sucC       | protein=succinyl-CoA synthetase subunit beta              | protein_id=KGT42509.1 |
| gene | 3689046 | 3689819 | 139206 | 139979 | gene=IY08_19370 | protein=ribonuclease H                                    | protein_id=KGT42510.1 |
| gene | 3689876 | 3690766 | 140036 | 140926 | gene=IY08_19375 | protein=GTPase                                            | protein_id=KGT42511.1 |
| gene | 3690787 | 3691338 | 140947 | 141498 | gene=IY08_19380 | protein=signal peptidase I                                | protein_id=KGT42512.1 |
| gene | 3691440 | 3691784 | 141600 | 141944 | gene=IY08_19385 | protein=50S ribosomal protein L19                         | protein_id=KGT42513.1 |
| gene | 3691931 | 3692665 | 142091 | 142825 | gene=IY08_19390 | protein=tRNA (guanine-N1)-methyltransferase               | protein_id=KGT42514.1 |
| gene | 3692665 | 3693180 | 142825 | 143340 | gene=IY08_19395 | protein=16S rRNA processing protein RimM                  | protein_id=KGT42515.1 |
| gene | 3693301 | 3693528 | 143461 | 143688 | gene=IY08_19400 | protein=RNA-binding protein                               | protein_id=KGT42516.1 |
| gene | 3693543 | 3693815 | 143703 | 143975 | gene=rpsP       | protein=30S ribosomal protein S16                         | protein_id=KGT42517.1 |
| gene | 3693917 | 3695266 | 144077 | 145426 | gene=IY08_19410 | protein=signal recognition particle                       | protein_id=KGT42518.1 |
| gene | 3695279 | 3695611 | 145439 | 145771 | gene=IY08_19415 | protein=hypothetical protein                              | protein_id=KGT42519.1 |
| gene | 3695745 | 3696734 | 145905 | 146894 | gene=IY08_19420 | protein=cell division protein FtsY                        | protein_id=KGT42520.1 |
| gene | 3696750 | 3700319 | 146910 | 150479 | gene=IY08_19425 | protein=chromosome segregation protein SMC                | protein_id=KGT42521.1 |
| gene | 3700466 | 3701203 | 150626 | 151363 | gene=IY08_19430 | protein=ribonuclease III                                  | protein_id=KGT42522.1 |
| gene | 3701262 | 3701495 | 151422 | 151655 | gene=IY08_19435 | protein=acyl carrier protein                              | protein_id=KGT42523.1 |
| gene | 3701565 | 3702305 | 151725 | 152465 | gene=IY08_19440 | protein=3-oxoacyl-ACP reductase                           | protein_id=KGT42524.1 |
| gene | 3702305 | 3703249 | 152465 | 153409 | gene=IY08_19445 | protein=malonyl CoA-ACP transacylase                      | protein_id=KGT42525.1 |
| gene | 3703264 | 3704256 | 153424 | 154416 | gene=IY08_19450 | protein=phosphate acyltransferase                         | protein_id=KGT42526.1 |
| gene | 3704253 | 3704846 | 154413 | 155006 | gene=IY08_19455 | protein=fatty acid biosynthesis transcriptional regulator | protein_id=KGT42527.1 |
| gene | 3704935 | 3706983 | 155095 | 157143 | gene=IY08_19460 | protein=ATP-dependent DNA helicase                        | protein_id=KGT42528.1 |
| gene | 3707274 | 3708950 | 157434 | 159110 | gene=IY08_19465 | protein=hypothetical protein                              | protein_id=KGT42529.1 |
| gene | 3708973 | 3709335 | 159133 | 159495 | gene=IY08_19470 | protein=hypothetical protein                              | protein_id=KGT42530.1 |
| gene | 3709712 | 3709900 | 159872 | 160060 | gene=IY08_19475 | protein=50S ribosomal protein L28                         | protein_id=KGT42531.1 |
| gene | 3709974 | 3710054 | 160134 | 160214 | gene=IY08_19480 | protein=stage V sporulation protein M                     | protein_id=KGT42532.1 |
| gene | 3710121 | 3710801 | 160281 | 160961 | gene=IY08_19485 | protein=thiamine pyrophosphokinase                        | protein_id=KGT42533.1 |
| gene | 3710871 | 3711515 | 161031 | 161675 | gene=IY08_19490 | protein=ribulose-phosphate 3-epimerase                    | protein_id=KGT42534.1 |
| gene | 3711518 | 3712399 | 161678 | 162559 | gene=IY08_19495 | protein=GTPase RsgA                                       | protein_id=KGT42535.1 |
| gene | 3712705 | 3714678 | 162865 | 164838 | gene=IY08_19500 | protein=serine/threonine protein kinase                   | protein_id=KGT41388.1 |
| gene | 3714687 | 3715439 | 164847 | 165599 | gene=IY08_19505 | protein=protein phosphatase                               | protein_id=KGT41389.1 |

|      |         |         |        |        |                 |                                                                                             |                       |
|------|---------|---------|--------|--------|-----------------|---------------------------------------------------------------------------------------------|-----------------------|
| gene | 3715444 | 3716532 | 165604 | 166692 | gene=IY08_19510 | protein=ribosomal RNA large subunit methyltransferase N                                     | protein_id=KGT41390.1 |
| gene | 3716537 | 3717871 | 166697 | 168031 | gene=IY08_19515 | protein=16S rRNA methyltransferase                                                          | protein_id=KGT41391.1 |
| gene | 3717868 | 3718812 | 168028 | 168972 | gene=IY08_19520 | protein=methionyl-tRNA formyltransferase                                                    | protein_id=KGT41392.1 |
| gene | 3718836 | 3719306 | 168996 | 169466 | gene=IY08_19525 | protein=peptide deformylase                                                                 | protein_id=KGT41393.1 |
| gene | 3719318 | 3721723 | 169478 | 171883 | gene=IY08_19530 | protein=primosomal protein N'                                                               | protein_id=KGT41394.1 |
| gene | 3721720 | 3722925 | 171880 | 173085 | gene=IY08_19535 | protein=phosphopantothenoylecysteine decarboxylase                                          | protein_id=KGT41395.1 |
| gene | 3723098 | 3723310 | 173258 | 173470 | gene=IY08_19540 | protein=DNA-directed RNA polymerase subunit omega                                           | protein_id=KGT41396.1 |
| gene | 3723313 | 3723930 | 173473 | 174090 | gene=IY08_19545 | protein=guanylate kinase                                                                    | protein_id=KGT41397.1 |
| gene | 3723944 | 3724207 | 174104 | 174367 | gene=IY08_19550 | protein=hypothetical protein                                                                | protein_id=KGT41398.1 |
| gene | 3724275 | 3725150 | 174435 | 175310 | gene=IY08_19555 | protein=hypothetical protein                                                                | protein_id=KGT41399.1 |
| gene | 3725250 | 3727973 | 175410 | 178133 | gene=IY08_19560 | protein=ATPase                                                                              | protein_id=KGT41400.1 |
| gene | 3728079 | 3729788 | 178239 | 179948 | gene=IY08_19565 | protein=hypothetical protein                                                                | protein_id=KGT41401.1 |
| gene | 3730133 | 3731203 | 180293 | 181363 | gene=IY08_19570 | protein=aminopeptidase                                                                      | protein_id=KGT41402.1 |
| gene | 3731286 | 3731810 | 181446 | 181970 | gene=IY08_19575 | protein=integrase                                                                           | protein_id=KGT41403.1 |
| gene | 3731993 | 3733378 | 182153 | 183538 | gene=IY08_19580 | protein=membrane protein                                                                    | protein_id=KGT41404.1 |
| gene | 3733546 | 3733800 | 183706 | 183960 | gene=IY08_19585 | protein=membrane protein                                                                    | protein_id=KGT41405.1 |
| gene | 3733817 | 3734494 | 183977 | 184654 | gene=IY08_19590 | protein=HAD family hydrolase                                                                | protein_id=KGT41406.1 |
| gene | 3734534 | 3735166 | 184694 | 185326 | gene=IY08_19595 | protein=orotate phosphoribosyltransferase                                                   | protein_id=KGT41407.1 |
| gene | 3735163 | 3735879 | 185323 | 186039 | gene=IY08_19600 | protein=orotidine 5'-phosphate decarboxylase                                                | protein_id=KGT41408.1 |
| gene | 3735864 | 3736793 | 186024 | 186953 | gene=IY08_19605 | protein=dihydroorotate dehydrogenase                                                        | protein_id=KGT41409.1 |
| gene | 3736790 | 3737569 | 186950 | 187729 | gene=IY08_19610 | protein=dihydroorotate dehydrogenase                                                        | protein_id=KGT41410.1 |
| gene | 3737566 | 3740784 | 187726 | 190944 | gene=IY08_19615 | protein=carbamoyl phosphate synthase large subunit                                          | protein_id=KGT41411.1 |
| gene | 3740769 | 3741866 | 190929 | 192026 | gene=IY08_19620 | protein=carbamoyl phosphate synthase small subunit                                          | protein_id=KGT41412.1 |
| gene | 3741863 | 3743149 | 192023 | 193309 | gene=IY08_19625 | protein=dihydroorotase                                                                      | protein_id=KGT41413.1 |
| gene | 3743133 | 3744047 | 193293 | 194207 | gene=IY08_19630 | protein=aspartate carbamoyltransferase catalytic subunit                                    | protein_id=KGT41414.1 |
| gene | 3744196 | 3745479 | 194356 | 195639 | gene=IY08_19635 | protein=uracil permease                                                                     | protein_id=KGT41415.1 |
| gene | 3745626 | 3746168 | 195786 | 196328 | gene=IY08_19640 | protein=bifunctional pyrimidine regulatory protein PyrR<br>uracil phosphoribosyltransferase | protein_id=KGT41416.1 |
| gene | 3746372 | 3747280 | 196532 | 197440 | gene=IY08_19645 | protein=pseudouridine synthase                                                              | protein_id=KGT41417.1 |
| gene | 3747285 | 3747743 | 197445 | 197903 | gene=IY08_19650 | protein=peptidase A8                                                                        | protein_id=KGT41418.1 |
| gene | 3747868 | 3748197 | 198028 | 198357 | gene=IY08_19655 | protein=molecular chaperone DnaK                                                            | protein_id=KGT41419.1 |



|      |         |         |        |        |                 |                                                                                 |                       |
|------|---------|---------|--------|--------|-----------------|---------------------------------------------------------------------------------|-----------------------|
| gene | 3748355 | 3751120 | 198515 | 201280 | gene=ileS       | protein=isoleucine--tRNA ligase                                                 | protein_id=KGT41420.1 |
| gene | 3751467 | 3751973 | 201627 | 202133 | gene=IY08_19665 | protein=septum formation initiator                                              | protein_id=KGT41421.1 |
| gene | 3752063 | 3752830 | 202223 | 202990 | gene=IY08_19670 | protein=RNA-binding protein S4                                                  | protein_id=KGT41422.1 |
| gene | 3752846 | 3753109 | 203006 | 203269 | gene=IY08_19675 | protein=membrane protein                                                        | protein_id=KGT41423.1 |
| gene | 3753116 | 3753586 | 203276 | 203746 | gene=IY08_19680 | protein=cell division protein SepF                                              | protein_id=KGT41424.1 |
| gene | 3753606 | 3754280 | 203766 | 204440 | gene=IY08_19685 | protein=hypothetical protein                                                    | protein_id=KGT41425.1 |
| gene | 3754277 | 3755095 | 204437 | 205255 | gene=IY08_19690 | protein=laccase                                                                 | protein_id=KGT41426.1 |
| gene | 3755216 | 3755497 | 205376 | 205657 | gene=IY08_19695 | protein=hypothetical protein                                                    | protein_id=KGT41427.1 |
| gene | 3755661 | 3756440 | 205821 | 206600 | gene=IY08_19700 | protein=sporulation sigma factor SigG                                           | protein_id=KGT41428.1 |
| gene | 3756598 | 3757317 | 206758 | 207477 | gene=IY08_19705 | protein=sporulation sigma factor SigE                                           | protein_id=KGT41429.1 |
| gene | 3757337 | 3758254 | 207497 | 208414 | gene=IY08_19710 | protein=peptidase                                                               | protein_id=KGT41430.1 |
| gene | 3758506 | 3759660 | 208666 | 209820 | gene=IY08_19715 | protein=cell division protein FtsZ                                              | protein_id=KGT41431.1 |
| gene | 3759700 | 3761007 | 209860 | 211167 | gene=IY08_19720 | protein=cell division protein FtsA                                              | protein_id=KGT41432.1 |
| gene | 3761407 | 3762177 | 211567 | 212337 | gene=IY08_19730 | protein=cell division protein FtsQ                                              | protein_id=KGT41433.1 |
| gene | 3762276 | 3763181 | 212436 | 213341 | gene=IY08_19735 | protein=UDP-N-acetylenolpyruvoylglucosamine reductase                           | protein_id=KGT41434.1 |
| gene | 3763394 | 3764488 | 213554 | 214648 | gene=IY08_19740 | protein=UDP-diphospho-muramoylpentapeptide beta-N-acetylglucosaminyltransferase | protein_id=KGT41435.1 |
| gene | 3764592 | 3765683 | 214752 | 215843 | gene=IY08_19745 | protein=stage V sporulation protein E                                           | protein_id=KGT41436.1 |
| gene | 3765774 | 3767126 | 215934 | 217286 | gene=murD       | protein=UDP-N-acetylmuramoyl-L-alanyl-D-glutamate synthetase                    | protein_id=KGT41437.1 |
| gene | 3767127 | 3768101 | 217287 | 218261 | gene=IY08_19755 | protein=phospho-N-acetylmuramoyl-pentapeptide-                                  | protein_id=KGT41438.1 |
| gene | 3768124 | 3769599 | 218284 | 219759 | gene=IY08_19760 | protein=UDP-N-acetylmuramoylalanyl-D-glutamate--2,6-diaminopimelate ligase      | protein_id=KGT41439.1 |
| gene | 3769784 | 3771700 | 219944 | 221860 | gene=IY08_19765 | protein=stage V sporulation protein D                                           | protein_id=KGT41440.1 |
| gene | 3771782 | 3773881 | 221942 | 224041 | gene=IY08_19770 | protein=dihydropteridine reductase                                              | protein_id=KGT41441.1 |
| gene | 3773954 | 3774316 | 224114 | 224476 | gene=IY08_19775 | protein=cell division protein FtsL                                              | protein_id=KGT41442.1 |
| gene | 3774332 | 3775264 | 224492 | 225424 | gene=IY08_19780 | protein=16S rRNA methyltransferase                                              | protein_id=KGT41443.1 |
| gene | 3775633 | 3777249 | 225793 | 227409 | gene=IY08_19785 | protein=hypothetical protein                                                    | protein_id=KGT41444.1 |
| gene | 3777329 | 3778213 | 227489 | 228373 | gene=IY08_19790 | protein=2-dehydropantoate 2-reductase                                           | protein_id=KGT41445.1 |
| gene | 3778508 | 3778981 | 228668 | 229141 | gene=IY08_19795 | protein=hypothetical protein                                                    | protein_id=KGT41446.1 |
| gene | 3779015 | 3779521 | 229175 | 229681 | gene=IY08_19800 | protein=DNA-binding protein                                                     | protein_id=KGT41447.1 |

|      |         |         |        |        |                 |                                                |                       |
|------|---------|---------|--------|--------|-----------------|------------------------------------------------|-----------------------|
| gene | 3779651 | 3779824 | 229811 | 229984 | gene=rpmF       | protein=50S ribosomal protein L32              | protein_id=KGT41448.1 |
| gene | 3779886 | 3780386 | 230046 | 230546 | gene=IY08_19810 | protein=hypothetical protein                   | protein_id=KGT41449.1 |
| gene | 3780600 | 3781781 | 230760 | 231941 | gene=IY08_19815 | protein=hypothetical protein                   | protein_id=KGT41450.1 |
| gene | 3781791 | 3782828 | 231951 | 232988 | gene=IY08_19820 | protein=hypothetical protein                   | protein_id=KGT41451.1 |
| gene | 3782821 | 3783612 | 232981 | 233772 | gene=IY08_19825 | protein=esterase                               | protein_id=KGT41452.1 |
| gene | 3783726 | 3784955 | 233886 | 235115 | gene=IY08_19830 | protein=sporulation protein                    | protein_id=KGT41453.1 |
| gene | 3784947 | 3785438 | 235107 | 235598 | gene=IY08_19835 | protein=phosphopantetheine adenylyltransferase | protein_id=KGT41454.1 |
| gene | 3785435 | 3786001 | 235595 | 236161 | gene=IY08_19840 | protein=DNA methyltransferase                  | protein_id=KGT41455.1 |
| gene | 3786500 | 3786889 | 236660 | 237049 | gene=IY08_19845 | protein=methylthioribose kinase                | protein_id=KGT41456.1 |
| gene | 3786944 | 3787210 | 237104 | 237370 | gene=IY08_19850 | protein=hypothetical protein                   | protein_id=KGT41457.1 |
| gene | 3787337 | 3787789 | 237497 | 237949 | gene=IY08_19855 | protein=regulator                              | protein_id=KGT41458.1 |
| gene | 3787904 | 3788476 | 238064 | 238636 | gene=IY08_19860 | protein=phosphoglycerate mutase                | protein_id=KGT41459.1 |
| gene | 3788553 | 3788798 | 238713 | 238958 | gene=IY08_19865 | protein=hypothetical protein                   | protein_id=KGT41460.1 |
| gene | 3788810 | 3789247 | 238970 | 239407 | gene=IY08_19870 | protein=cytoplasmic protein                    | protein_id=KGT41461.1 |
| gene | 3789434 | 3790468 | 239594 | 240628 | gene=IY08_19875 | protein=membrane protein                       | protein_id=KGT41462.1 |
| gene | 3790673 | 3791038 | 240833 | 241198 | gene=IY08_19880 | protein=hypothetical protein                   | protein_id=KGT41463.1 |
| gene | 3791085 | 3792083 | 241245 | 242243 | gene=amiF       | protein=formamidase                            | protein_id=KGT41464.1 |
| gene | 3792316 | 3793221 | 242476 | 243381 | gene=IY08_19890 | protein=cytochrome C oxidase assembly protein  | protein_id=KGT41465.1 |
| gene | 3793302 | 3793634 | 243462 | 243794 | gene=IY08_19895 | protein=cytochrome B6                          | protein_id=KGT41466.1 |
| gene | 3793638 | 3794261 | 243798 | 244421 | gene=IY08_19900 | protein=cytochrome B oxidoreductase            | protein_id=KGT41467.1 |
| gene | 3794261 | 3796123 | 244421 | 246283 | gene=IY08_19905 | protein=quinol oxidase subunit 1               | protein_id=KGT41468.1 |
| gene | 3796157 | 3797206 | 246317 | 247366 | gene=IY08_19910 | protein=cytochrome B                           | protein_id=KGT41469.1 |
| gene | 3797300 | 3798223 | 247460 | 248383 | gene=IY08_19915 | protein=protoheme IX farnesyltransferase       | protein_id=KGT41470.1 |
| gene | 3798721 | 3799656 | 248881 | 249816 | gene=IY08_19920 | protein=heme A synthase                        | protein_id=KGT41471.1 |
| gene | 3799740 | 3803186 | 249900 | 253346 | gene=IY08_19925 | protein=pyruvate carboxylase                   | protein_id=KGT41472.1 |
| gene | 3803519 | 3804697 | 253679 | 254857 | gene=IY08_19930 | protein=cell division protein FtsW             | protein_id=KGT41473.1 |
| gene | 3804823 | 3805110 | 254983 | 255270 | gene=IY08_19935 | protein=hypothetical protein                   | protein_id=KGT41474.1 |
| gene | 3805266 | 3805763 | 255426 | 255923 | gene=IY08_19940 | protein=hypothetical protein                   | protein_id=KGT41475.1 |
| gene | 3805795 | 3807123 | 255955 | 257283 | gene=IY08_19945 | protein=hypothetical protein                   | protein_id=KGT41476.1 |
| gene | 3807370 | 3807825 | 257530 | 257985 | gene=IY08_19950 | protein=hypothetical protein                   | protein_id=KGT41477.1 |
| gene | 3807971 | 3808171 | 258131 | 258331 | gene=IY08_19955 | protein=hypothetical protein                   | protein_id=KGT41478.1 |

|      |         |         |        |        |                 |                                                                          |                       |
|------|---------|---------|--------|--------|-----------------|--------------------------------------------------------------------------|-----------------------|
| gene | 3808207 | 3808482 | 258367 | 258642 | gene=IY08_19960 | protein=hypothetical protein                                             | protein_id=KGT41479.1 |
| gene | 3808498 | 3808800 | 258658 | 258960 | gene=IY08_19965 | protein=membrane protein                                                 | protein_id=KGT41480.1 |
| gene | 3808958 | 3810802 | 259118 | 260962 | gene=IY08_19970 | protein=GTP-binding protein TypA                                         | protein_id=KGT41481.1 |
| gene | 3810943 | 3811122 | 261103 | 261282 | gene=IY08_19975 | protein=methyltransferase                                                | protein_id=KGT41482.1 |
| gene | 3811172 | 3811957 | 261332 | 262117 | gene=IY08_19980 | protein=inositol monophosphatase                                         | protein_id=KGT41483.1 |
| gene | 3812046 | 3812234 | 262206 | 262394 | gene=IY08_19985 | protein=hypothetical protein                                             | protein_id=KGT41484.1 |
| gene | 3812441 | 3813067 | 262601 | 263227 | gene=IY08_19990 | protein=hypothetical protein                                             | protein_id=KGT41485.1 |
| gene | 3813149 | 3813418 | 263309 | 263578 | gene=IY08_19995 | protein=hypothetical protein                                             | protein_id=KGT41486.1 |
| gene | 3813784 | 3815256 | 263944 | 265416 | gene=IY08_20000 | protein=arginine decarboxylase                                           | protein_id=KGT41487.1 |
| gene | 3815332 | 3816162 | 265492 | 266322 | gene=tgl        | protein=transglutaminase                                                 | protein_id=KGT41488.1 |
| gene | 3816199 | 3816327 | 266359 | 266487 | gene=IY08_20010 | protein=phosphoesterase                                                  | protein_id=KGT41489.1 |
| gene | 3816372 | 3816500 | 266532 | 266660 | gene=IY08_20015 | protein=phosphoesterase                                                  | protein_id=KGT41490.1 |
| gene | 3816560 | 3816688 | 266720 | 266848 | gene=IY08_20020 | protein=phosphoesterase                                                  | protein_id=KGT41491.1 |
| gene | 3816883 | 3817179 | 267043 | 267339 | gene=IY08_20025 | protein=hypothetical protein                                             | protein_id=KGT41492.1 |
| gene | 3817310 | 3817702 | 267470 | 267862 | gene=IY08_20030 | protein=protein TPR repeat                                               | protein_id=KGT41493.1 |
| gene | 3817704 | 3817931 | 267864 | 268091 | gene=IY08_20035 | protein=hypothetical protein                                             | protein_id=KGT41494.1 |
| gene | 3818166 | 3819578 | 268326 | 269738 | gene=IY08_20040 | protein=dihydrolipoamide dehydrogenase                                   | protein_id=KGT41495.1 |
| gene | 3819584 | 3820873 | 269744 | 271033 | gene=IY08_20045 | protein=branched-chain alpha-keto acid dehydrogenase subunit E2          | protein_id=KGT41496.1 |
| gene | 3820967 | 3821944 | 271127 | 272104 | gene=IY08_20050 | protein=2-oxoisovalerate dehydrogenase                                   | protein_id=KGT41497.1 |
| gene | 3821948 | 3823063 | 272108 | 273223 | gene=IY08_20055 | protein=pyruvate dehydrogenase                                           | protein_id=KGT41498.1 |
| gene | 3823578 | 3823724 | 273738 | 273884 | gene=IY08_20060 | protein=ABC transporter substrate-binding protein                        | protein_id=KGT41499.1 |
| gene | 3823893 | 3824447 | 274053 | 274607 | gene=def        | protein=peptide deformylase                                              | protein_id=KGT41500.1 |
| gene | 3824508 | 3825281 | 274668 | 275441 | gene=IY08_20070 | protein=phosphatase                                                      | protein_id=KGT41501.1 |
| gene | 3825829 | 3826041 | 275989 | 276201 | gene=IY08_20075 | protein=hypothetical protein                                             | protein_id=KGT41502.1 |
| gene | 3826046 | 3827713 | 276206 | 277873 | gene=IY08_20080 | protein=ribonuclease J                                                   | protein_id=KGT41503.1 |
| gene | 3827752 | 3828417 | 277912 | 278577 | gene=IY08_20085 | protein=potassium transporter Trk                                        | protein_id=KGT41504.1 |
| gene | 3828500 | 3829366 | 278660 | 279526 | gene=IY08_20090 | protein=cytochrome C oxidase assembly protein                            | protein_id=KGT41505.1 |
| gene | 3829613 | 3830743 | 279773 | 280903 | gene=IY08_20095 | protein=N-acetyldiaminopimelate deacetylase                              | protein_id=KGT41506.1 |
| gene | 3830807 | 3831529 | 280967 | 281689 | gene=IY08_20100 | protein=2,3,4,5-tetrahydropyridine-2,6-carboxylate N-succinyltransferase | protein_id=KGT41507.1 |

|      |         |         |        |        |                 |                                                                                   |                       |
|------|---------|---------|--------|--------|-----------------|-----------------------------------------------------------------------------------|-----------------------|
| gene | 3831601 | 3832458 | 281761 | 282618 | gene=IY08_20105 | protein=LysR family transcriptional regulator                                     | protein_id=KGT41508.1 |
| gene | 3832665 | 3833108 | 282825 | 283268 | gene=IY08_20110 | protein=CBS domain-containing protein YkuL                                        | protein_id=KGT41509.1 |
| gene | 3833277 | 3833468 | 283437 | 283628 | gene=IY08_20115 | protein=recombinase XerD                                                          | protein_id=KGT41510.1 |
| gene | 3833589 | 3834107 | 283749 | 284267 | gene=IY08_20120 | protein=hypothetical protein                                                      | protein_id=KGT41511.1 |
| gene | 3834182 | 3834331 | 284342 | 284491 | gene=IY08_20125 | protein=hypothetical protein                                                      | protein_id=KGT41512.1 |
| gene | 3834573 | 3834809 | 284733 | 284969 | gene=IY08_20130 | protein=hypothetical protein                                                      | protein_id=KGT41513.1 |
| gene | 3835043 | 3835279 | 285203 | 285439 | gene=IY08_20135 | protein=glutaredoxin                                                              | protein_id=KGT41514.1 |
| gene | 3835408 | 3835896 | 285568 | 286056 | gene=IY08_20140 | protein=hypothetical protein                                                      | protein_id=KGT41515.1 |
| gene | 3836079 | 3837296 | 286239 | 287456 | gene=IY08_20145 | protein=diguanylate phosphodiesterase                                             | protein_id=KGT41516.1 |
| gene | 3837552 | 3838316 | 287712 | 288476 | gene=IY08_20150 | protein=short-chain dehydrogenase                                                 | protein_id=KGT41517.1 |
| gene | 3838547 | 3839404 | 288707 | 289564 | gene=IY08_20155 | protein=metallophosphoesterase                                                    | protein_id=KGT41518.1 |
| gene | 3839502 | 3839738 | 289662 | 289898 | gene=IY08_20160 | protein=hypothetical protein                                                      | protein_id=KGT41519.1 |
| gene | 3839899 | 3842007 | 290059 | 292167 | gene=IY08_20165 | protein=polyphosphate kinase                                                      | protein_id=KGT41520.1 |
| gene | 3842116 | 3843654 | 292276 | 293814 | gene=IY08_20170 | protein=exopolyphosphatase                                                        | protein_id=KGT41521.1 |
| gene | 3843832 | 3844290 | 293992 | 294450 | gene=IY08_20175 | protein=cytoplasmic protein                                                       | protein_id=KGT41522.1 |
| gene | 3844322 | 3844984 | 294482 | 295144 | gene=IY08_20180 | protein=lipoprotein                                                               | protein_id=KGT41523.1 |
| gene | 3845599 | 3846252 | 295759 | 296412 | gene=IY08_20185 | protein=diguanylate cyclase                                                       | protein_id=KGT41524.1 |
| gene | 3846416 | 3846649 | 296576 | 296809 | gene=IY08_20190 | protein=hypothetical protein                                                      | protein_id=KGT41525.1 |
| gene | 3846681 | 3847181 | 296841 | 297341 | gene=IY08_20195 | protein=hypothetical protein                                                      | protein_id=KGT41526.1 |
| gene | 3847594 | 3849135 | 297754 | 299295 | gene=IY08_20200 | protein=major facilitator transporter                                             | protein_id=KGT41527.1 |
| gene | 3849374 | 3849931 | 299534 | 300091 | gene=IY08_20205 | protein=PadR family transcriptional regulator                                     | protein_id=KGT41528.1 |
| gene | 3850443 | 3852731 | 300603 | 302891 | gene=IY08_20215 | protein=5-methyltetrahydropteroyltryglutamate--<br>homocysteine methyltransferase | protein_id=KGT41529.1 |
| gene | 3852770 | 3853159 | 302930 | 303319 | gene=IY08_20220 | protein=competence protein                                                        | protein_id=KGT41530.1 |
| gene | 3853196 | 3853630 | 303356 | 303790 | gene=IY08_20225 | protein=DNA-entry nuclease                                                        | protein_id=KGT41531.1 |
| gene | 3853857 | 3854606 | 304017 | 304766 | gene=IY08_20230 | protein=cytoplasmic protein                                                       | protein_id=KGT41532.1 |
| gene | 3854645 | 3855919 | 304805 | 306079 | gene=IY08_20235 | protein=sporulation kinase                                                        | protein_id=KGT41533.1 |
| gene | 3856230 | 3856430 | 306390 | 306590 | gene=IY08_20240 | protein=hypothetical protein                                                      | protein_id=KGT41534.1 |
| gene | 3856553 | 3857716 | 306713 | 307876 | gene=IY08_20245 | protein=aromatic amino acid aminotransferase                                      | protein_id=KGT41535.1 |
| gene | 3857730 | 3858752 | 307890 | 308912 | gene=IY08_20250 | protein=LacI family transcriptional regulator                                     | protein_id=KGT41536.1 |
| gene | 3859022 | 3859864 | 309182 | 310024 | gene=IY08_20255 | protein=arabinogalactan ABC transporter permease                                  | protein_id=KGT41537.1 |

|      |         |         |        |        |                 |                                                                       |                       |
|------|---------|---------|--------|--------|-----------------|-----------------------------------------------------------------------|-----------------------|
| gene | 3859865 | 3861166 | 310025 | 311326 | gene=IY08_20260 | protein=arabinogalactan ABC transporter permease                      | protein_id=KGT41538.1 |
| gene | 3861243 | 3862502 | 311403 | 312662 | gene=IY08_20265 | protein=cyclodextrin-binding protein                                  | protein_id=KGT41539.1 |
| gene | 3862826 | 3864586 | 312986 | 314746 | gene=IY08_20270 | protein=cyclomaltodextrinase                                          | protein_id=KGT41540.1 |
| gene | 3864633 | 3866309 | 314793 | 316469 | gene=IY08_20275 | protein=oligo-1,6-glucosidase                                         | protein_id=KGT41541.1 |
| gene | 3866572 | 3867672 | 316732 | 317832 | gene=IY08_20280 | protein=sugar ABC transporter ATP-binding protein                     | protein_id=KGT41542.1 |
| gene | 3867738 | 3868247 | 317898 | 318407 | gene=IY08_20285 | protein=hypothetical protein                                          | protein_id=KGT41543.1 |
| gene | 3868319 | 3868408 | 318479 | 318568 | gene=IY08_20290 | protein=flagellar motor protein                                       | protein_id=KGT41544.1 |
| gene | 3868620 | 3869075 | 318780 | 319235 | gene=IY08_20295 | protein=hypothetical protein                                          | protein_id=KGT41545.1 |
| gene | 3869207 | 3869638 | 319367 | 319798 | gene=IY08_20300 | protein=lipoprotein                                                   | protein_id=KGT41546.1 |
| gene | 3869668 | 3870429 | 319828 | 320589 | gene=IY08_20305 | protein=lipoprotein                                                   | protein_id=KGT41547.1 |
| gene | 3870467 | 3871195 | 320627 | 321355 | gene=IY08_20310 | protein=membrane protein                                              | protein_id=KGT41548.1 |
| gene | 3871412 | 3872137 | 321572 | 322297 | gene=IY08_20315 | protein=ATPase AAA                                                    | protein_id=KGT41549.1 |
| gene | 3872167 | 3873342 | 322327 | 323502 | gene=IY08_20320 | protein=acetyl-CoA acetyltransferase                                  | protein_id=KGT41550.1 |
| gene | 3873482 | 3873931 | 323642 | 324091 | gene=IY08_20325 | protein=DNA mismatch repair protein MutT                              | protein_id=KGT41551.1 |
| gene | 3874039 | 3874332 | 324199 | 324492 | gene=IY08_20330 | protein=hypothetical protein                                          | protein_id=KGT41552.1 |
| gene | 3874508 | 3875125 | 324668 | 325285 | gene=IY08_20335 | protein=hypothetical protein                                          | protein_id=KGT41553.1 |
| gene | 3875141 | 3875278 | 325301 | 325438 | gene=IY08_20340 | protein=DNA-binding protein                                           | protein_id=KGT42382.1 |
| gene | 3875297 | 3876058 | 325457 | 326218 | gene=IY08_20345 | protein=hypothetical protein                                          | protein_id=KGT41554.1 |
| gene | 3876072 | 3876839 | 326232 | 326999 | gene=IY08_20350 | protein=NADH dehydrogenase                                            | protein_id=KGT41555.1 |
| gene | 3876839 | 3877171 | 326999 | 327331 | gene=IY08_20355 | protein=PadR family transcriptional regulator                         | protein_id=KGT41556.1 |
| gene | 3877368 | 3878144 | 327528 | 328304 | gene=IY08_20360 | protein=3-hydroxybutyrate dehydrogenase                               | protein_id=KGT41557.1 |
| gene | 3878174 | 3878335 | 328334 | 328495 | gene=IY08_20365 | protein=ribonuclease Z                                                | protein_id=KGT41558.1 |
| gene | 3878403 | 3879464 | 328563 | 329624 | gene=mtnA       | protein=methylthioribose-1-phosphate isomerase                        | protein_id=KGT41559.1 |
| gene | 3879461 | 3880642 | 329621 | 330802 | gene=mtnK       | protein=methylthioribose kinase                                       | protein_id=KGT41560.1 |
| gene | 3880946 | 3881725 | 331106 | 331885 | gene=IY08_20380 | protein=hydrolase                                                     | protein_id=KGT41561.1 |
| gene | 3881824 | 3883002 | 331984 | 333162 | gene=IY08_20385 | protein=aminotransferase                                              | protein_id=KGT41562.1 |
| gene | 3883237 | 3884481 | 333397 | 334641 | gene=mtnW       | protein=2,3-diketo-5-methylthiopentyl-1-phosphate enolase             | protein_id=KGT41563.1 |
| gene | 3884478 | 3885137 | 334638 | 335297 | gene=mtnX       | protein=2-hydroxy-3-keto-5-methylthiopentenyl-1-phosphate phosphatase | protein_id=KGT41564.1 |
| gene | 3885134 | 3885772 | 335294 | 335932 | gene=mtnB       | protein=methylthioribulose-1-phosphate dehydratase                    | protein_id=KGT41565.1 |
| gene | 3885750 | 3886262 | 335910 | 336422 | gene=IY08_20405 | protein=acireductone dioxygenase                                      | protein_id=KGT41566.1 |

|      |         |         |        |        |                 |                                                         |                       |
|------|---------|---------|--------|--------|-----------------|---------------------------------------------------------|-----------------------|
| gene | 3886539 | 3886814 | 336699 | 336974 | gene=IY08_20410 | protein=hypothetical protein                            | protein_id=KGT41567.1 |
| gene | 3886866 | 3887198 | 337026 | 337358 | gene=IY08_20415 | protein=hypothetical protein                            | protein_id=KGT41568.1 |
| gene | 3887204 | 3888082 | 337364 | 338242 | gene=IY08_20420 | protein=oxidoreductase                                  | protein_id=KGT41569.1 |
| gene | 3888087 | 3889223 | 338247 | 339383 | gene=IY08_20425 | protein=penicillin-binding protein                      | protein_id=KGT41570.1 |
| gene | 3889315 | 3890607 | 339475 | 340767 | gene=IY08_20430 | protein=diguanylate cyclase                             | protein_id=KGT41571.1 |
| gene | 3890935 | 3891552 | 341095 | 341712 | gene=IY08_20435 | protein=NAD(P)H nitroreductase                          | protein_id=KGT41572.1 |
| gene | 3891787 | 3892005 | 341947 | 342165 | gene=IY08_20440 | protein=hypothetical protein                            | protein_id=KGT41573.1 |
| gene | 3892202 | 3892570 | 342362 | 342730 | gene=IY08_20445 | protein=hypothetical protein                            | protein_id=KGT41574.1 |
| gene | 3892668 | 3894380 | 342828 | 344540 | gene=IY08_20450 | protein=phosphoenolpyruvate-protein phosphotransferase  | protein_id=KGT41575.1 |
| gene | 3894380 | 3894643 | 344540 | 344803 | gene=IY08_20455 | protein=phosphocarrier protein HPr                      | protein_id=KGT41576.1 |
| gene | 3894779 | 3896842 | 344939 | 347002 | gene=IY08_20460 | protein=PTS system glucose-specific transporter subunit | protein_id=KGT41577.1 |
| gene | 3897182 | 3898030 | 347342 | 348190 | gene=IY08_20465 | protein=PtsGHI operon antiterminator                    | protein_id=KGT41578.1 |
| gene | 3898196 | 3899002 | 348356 | 349162 | gene=IY08_20470 | protein=HAD family hydrolase                            | protein_id=KGT41579.1 |
| gene | 3899076 | 3899753 | 349236 | 349913 | gene=IY08_20475 | protein=GntR family transcriptional regulator           | protein_id=KGT41580.1 |
| gene | 3899737 | 3900525 | 349897 | 350685 | gene=IY08_20480 | protein=glucosamine-6-phosphate deaminase               | protein_id=KGT41581.1 |
| gene | 3900530 | 3901672 | 350690 | 351832 | gene=IY08_20485 | protein=N-acetylglucosamine-6-phosphate deacetylase     | protein_id=KGT41582.1 |
| gene | 3901884 | 3902786 | 352044 | 352946 | gene=IY08_20490 | protein=competence protein ComE                         | protein_id=KGT41583.1 |
| gene | 3902865 | 3903437 | 353025 | 353597 | gene=IY08_20495 | protein=segregation and condensation protein B          | protein_id=KGT41584.1 |
| gene | 3903356 | 3903544 | 353516 | 353704 | pseudo          |                                                         |                       |
| gene | 3903596 | 3904339 | 353756 | 354499 | gene=IY08_20505 | protein=segregation and condensation protein A          | protein_id=KGT41585.1 |
| gene | 3904509 | 3904604 | 354669 | 354764 | gene=IY08_20510 | protein=hypothetical protein                            | protein_id=KGT41586.1 |
| gene | 3904704 | 3905222 | 354864 | 355382 | gene=IY08_20515 | protein=hypothetical protein                            | protein_id=KGT41587.1 |
| gene | 3905243 | 3905611 | 355403 | 355771 | gene=IY08_20520 | protein=protein RibT                                    | protein_id=KGT41588.1 |
| gene | 3906071 | 3906508 | 356231 | 356668 | gene=IY08_20530 | protein=peptidylprolyl isomerase                        | protein_id=KGT41589.1 |
| gene | 3906696 | 3907562 | 356856 | 357722 | gene=IY08_20535 | protein=hypothetical protein                            | protein_id=KGT41590.1 |
| gene | 3907594 | 3908397 | 357754 | 358557 | gene=IY08_20540 | protein=HAD family hydrolase                            | protein_id=KGT41591.1 |
| gene | 3908495 | 3909967 | 358655 | 360127 | gene=IY08_20545 | protein=stage V sporulation protein AF                  | protein_id=KGT41592.1 |
| gene | 3909954 | 3910523 | 360114 | 360683 | gene=IY08_20550 | protein=stage V sporulation protein AE                  | protein_id=KGT41593.1 |
| gene | 3910529 | 3910879 | 360689 | 361039 | gene=IY08_20555 | protein=stage V sporulation protein AEB                 | protein_id=KGT41594.1 |
| gene | 3910883 | 3911899 | 361043 | 362059 | gene=IY08_20560 | protein=stage V sporulation protein AD                  | protein_id=KGT41595.1 |
| gene | 3911913 | 3912371 | 362073 | 362531 | gene=IY08_20565 | protein=stage V sporulation protein AC                  | protein_id=KGT41596.1 |

|      |         |         |        |        |                 |                                                 |                       |
|------|---------|---------|--------|--------|-----------------|-------------------------------------------------|-----------------------|
| gene | 3912386 | 3912802 | 362546 | 362962 | gene=IY08_20570 | protein=stage V sporulation protein AB          | protein_id=KGT41597.1 |
| gene | 3912795 | 3913415 | 362955 | 363575 | gene=IY08_20575 | protein=stage V sporulation protein AA          | protein_id=KGT41598.1 |
| gene | 3913531 | 3913629 | 363691 | 363789 | gene=IY08_20580 | protein=methylenetetrahydrofolate dehydrogenase | protein_id=KGT41599.1 |
| gene | 3913629 | 3915155 | 363789 | 365315 | gene=IY08_20585 | protein=transporter                             | protein_id=KGT41600.1 |
| gene | 3915291 | 3916049 | 365451 | 366209 | gene=IY08_20590 | protein=sporulation sigma factor SigF           | protein_id=KGT41601.1 |
| gene | 3916062 | 3916502 | 366222 | 366662 | gene=IY08_20595 | protein=anti-sigma F factor                     | protein_id=KGT41602.1 |
| gene | 3916503 | 3916853 | 366663 | 367013 | gene=IY08_20600 | protein=anti-sigma F factor antagonist          | protein_id=KGT41603.1 |
| gene | 3917023 | 3918213 | 367183 | 368373 | gene=IY08_20605 | protein=D-alanyl-D-alanine carboxypeptidase     | protein_id=KGT41604.1 |
| gene | 3918380 | 3918799 | 368540 | 368959 | gene=IY08_20610 | protein=GntR family transcriptional regulator   | protein_id=KGT41605.1 |
| gene | 3918765 | 3919646 | 368925 | 369806 | gene=IY08_20615 | protein=ABC transporter ATP-binding protein     | protein_id=KGT41606.1 |
| gene | 3919636 | 3920724 | 369796 | 370884 | gene=IY08_20620 | protein=acetoin ABC transporter permease        | protein_id=KGT41607.1 |
| gene | 3920920 | 3921465 | 371080 | 371625 | gene=IY08_20625 | protein=hypothetical protein                    | protein_id=KGT41608.1 |
| gene | 3921565 | 3921984 | 371725 | 372144 | gene=IY08_20630 | protein=MarR family transcriptional regulator   | protein_id=KGT41609.1 |
| gene | 3922144 | 3922815 | 372304 | 372975 | gene=IY08_20635 | protein=membrane protein                        | protein_id=KGT41610.1 |
| gene | 3922950 | 3924239 | 373110 | 374399 | gene=IY08_20640 | protein=permease                                | protein_id=KGT41611.1 |
| gene | 3924270 | 3925232 | 374430 | 375392 | gene=IY08_20645 | protein=metal transporter                       | protein_id=KGT41612.1 |
| gene | 3925292 | 3926596 | 375452 | 376756 | gene=deoA       | protein=thymidine phosphorylase                 | protein_id=KGT41613.1 |
| gene | 3926604 | 3927425 | 376764 | 377585 | gene=IY08_20655 | protein=purine nucleoside phosphorylase         | protein_id=KGT41614.1 |
| gene | 3927438 | 3928622 | 377598 | 378782 | gene=IY08_20660 | protein=phosphopentomutase                      | protein_id=KGT41615.1 |
| gene | 3928977 | 3929717 | 379137 | 379877 | gene=IY08_20665 | protein=hypothetical protein                    | protein_id=KGT41616.1 |
| gene | 3929865 | 3930755 | 380025 | 380915 | gene=IY08_20670 | protein=recombinase XerD                        | protein_id=KGT41617.1 |
| gene | 3930762 | 3930992 | 380922 | 381152 | gene=IY08_20675 | protein=membrane protein                        | protein_id=KGT41618.1 |
| gene | 3931096 | 3931551 | 381256 | 381711 | gene=IY08_20680 | protein=Fur family transcriptional regulator    | protein_id=KGT41619.1 |
| gene | 3931659 | 3932306 | 381819 | 382466 | gene=IY08_20685 | protein=stage II sporulation protein M          | protein_id=KGT41620.1 |
| gene | 3932432 | 3932983 | 382592 | 383143 | gene=IY08_20690 | protein=acetyltransferase                       | protein_id=KGT41621.1 |
| gene | 3933008 | 3933547 | 383168 | 383707 | gene=IY08_20695 | protein=ADP-ribose pyrophosphatase              | protein_id=KGT41622.1 |
| gene | 3933622 | 3933756 | 383782 | 383916 | gene=IY08_20700 | protein=PadR family transcriptional regulator   | protein_id=KGT41623.1 |
| gene | 3933849 | 3934763 | 384009 | 384923 | gene=IY08_20705 | protein=oxidoreductase                          | protein_id=KGT41624.1 |
| gene | 3934821 | 3935648 | 384981 | 385808 | gene=IY08_20710 | protein=glyoxal reductase                       | protein_id=KGT41625.1 |
| gene | 3935784 | 3936308 | 385944 | 386468 | gene=IY08_20715 | protein=glutamate-rich protein GrpB             | protein_id=KGT41626.1 |
| gene | 3936375 | 3936638 | 386535 | 386798 | gene=IY08_20720 | protein=sulfurtransferase                       | protein_id=KGT41627.1 |

|      |         |         |        |        |                 |                                                                    |                       |
|------|---------|---------|--------|--------|-----------------|--------------------------------------------------------------------|-----------------------|
| gene | 3936840 | 3938429 | 387000 | 388589 | gene=IY08_20725 | protein=5'-nucleotidase                                            | protein_id=KGT41628.1 |
| gene | 3938555 | 3939031 | 388715 | 389191 | gene=IY08_20730 | protein=CopG family transcriptional regulator                      | protein_id=KGT41629.1 |
| gene | 3939153 | 3940151 | 389313 | 390311 | gene=IY08_20735 | protein=alpha/beta hydrolase                                       | protein_id=KGT41630.1 |
| gene | 3940283 | 3941602 | 390443 | 391762 | gene=IY08_20740 | protein=sodium:proton antiporter                                   | protein_id=KGT41631.1 |
| gene | 3941627 | 3942490 | 391787 | 392650 | gene=IY08_20745 | protein=LacI family transcriptional regulator                      | protein_id=KGT41632.1 |
| gene | 3942590 | 3943072 | 392750 | 393232 | gene=IY08_20750 | protein=acetyltransferase                                          | protein_id=KGT41633.1 |
| gene | 3943154 | 3944080 | 393314 | 394240 | gene=IY08_20755 | protein=alpha/beta hydrolase                                       | protein_id=KGT41634.1 |
| gene | 3944090 | 3944335 | 394250 | 394495 | gene=IY08_20760 | protein=hypothetical protein                                       | protein_id=KGT41635.1 |
| gene | 3944624 | 3944830 | 394784 | 394990 | gene=IY08_20765 | protein=zinc finger domain-containing protein                      | protein_id=KGT41636.1 |
| gene | 3945470 | 3946582 | 395630 | 396742 | gene=IY08_20770 | protein=5-amino-6-(5-phosphoribosylamino)uracil                    | protein_id=KGT41637.1 |
| gene | 3946564 | 3947208 | 396724 | 397368 | gene=IY08_20775 | protein=riboflavin synthase subunit alpha                          | protein_id=KGT41638.1 |
| gene | 3947221 | 3948414 | 397381 | 398574 | gene=IY08_20780 | protein=3,4-dihydroxy-2-butanone 4-phosphate synthase              | protein_id=KGT41639.1 |
| gene | 3948433 | 3948894 | 398593 | 399054 | gene=ribH       | protein=6,7-dimethyl-8-ribityllumazine synthase                    | protein_id=KGT41640.1 |
| gene | 3948918 | 3949238 | 399078 | 399398 | gene=IY08_20790 | protein=hypothetical protein                                       | protein_id=KGT41641.1 |
| gene | 3949421 | 3950419 | 399581 | 400579 | gene=IY08_20795 | protein=biotin synthase                                            | protein_id=KGT41642.1 |
| gene | 3950421 | 3951230 | 400581 | 401390 | gene=IY08_20800 | protein=malonyl-CoA O-methyltransferase                            | protein_id=KGT41643.1 |
| gene | 3951196 | 3951936 | 401356 | 402096 | gene=IY08_20805 | protein=transporter                                                | protein_id=KGT41644.1 |
| gene | 3951933 | 3953120 | 402093 | 403280 | gene=IY08_20810 | protein=8-amino-7-oxononanoate synthase                            | protein_id=KGT41645.1 |
| gene | 3953086 | 3953814 | 403246 | 403974 | gene=IY08_20815 | protein=dethiobiotin synthetase                                    | protein_id=KGT41646.1 |
| gene | 3953814 | 3955202 | 403974 | 405362 | gene=IY08_20820 | protein=adenosylmethionine-8-amino-7-oxononanoate aminotransferase | protein_id=KGT41647.1 |
| gene | 3955325 | 3955681 | 405485 | 405841 | gene=IY08_20825 | protein=hypothetical protein                                       | protein_id=KGT41648.1 |
| gene | 3956324 | 3957697 | 406484 | 407857 | gene=IY08_20830 | protein=sodium:proton antiporter                                   | protein_id=KGT41649.1 |
| gene | 3957746 | 3960067 | 407906 | 410227 | gene=cpdB       | protein=2', 3'-cyclic nucleotide 2'-phosphodiesterase              | protein_id=KGT41650.1 |
| gene | 3960433 | 3961212 | 410593 | 411372 | gene=IY08_20840 | protein=lipase                                                     | protein_id=KGT41651.1 |
| gene | 3961285 | 3961731 | 411445 | 411891 | gene=IY08_20845 | protein=MarR family transcriptional regulator                      | protein_id=KGT41652.1 |
| gene | 3961756 | 3961971 | 411916 | 412131 | gene=IY08_20850 | protein=hypothetical protein                                       | protein_id=KGT41653.1 |
| gene | 3962029 | 3962589 | 412189 | 412749 | gene=IY08_20855 | protein=group-specific protein                                     | protein_id=KGT41654.1 |
| gene | 3962728 | 3963678 | 412888 | 413838 | gene=IY08_20860 | protein=ornithine carbamoyltransferase                             | protein_id=KGT41655.1 |
| gene | 3963691 | 3964851 | 413851 | 415011 | gene=IY08_20865 | protein=acetylornithine aminotransferase                           | protein_id=KGT41656.1 |
| gene | 3964848 | 3965615 | 415008 | 415775 | gene=IY08_20870 | protein=acetylglutamate kinase                                     | protein_id=KGT41657.1 |



|      |         |         |        |        |                 |                                                     |                       |
|------|---------|---------|--------|--------|-----------------|-----------------------------------------------------|-----------------------|
| gene | 3965627 | 3966850 | 415787 | 417010 | gene=IY08_20875 | protein=N-acetylglutamate synthase                  | protein_id=KGT41658.1 |
| gene | 3966861 | 3967898 | 417021 | 418058 | gene=IY08_20880 | protein=N-acetyl-gamma-glutamyl-phosphate reductase | protein_id=KGT41659.1 |
| gene | 3968123 | 3968311 | 418283 | 418471 | gene=IY08_20885 | protein=hypothetical protein                        | protein_id=KGT41660.1 |
| gene | 3968340 | 3969134 | 418500 | 419294 | gene=IY08_20890 | protein=oxidoreductase                              | protein_id=KGT41661.1 |
| gene | 3969144 | 3970097 | 419304 | 420257 | gene=IY08_20895 | protein=hydrolase                                   | protein_id=KGT41662.1 |
| gene | 3970263 | 3971102 | 420423 | 421262 | gene=IY08_20900 | protein=pyrroline-5-carboxylate reductase           | protein_id=KGT41663.1 |
| gene | 3971149 | 3972027 | 421309 | 422187 | gene=IY08_20905 | protein=serine dehydratase                          | protein_id=KGT41664.1 |
| gene | 3972046 | 3972705 | 422206 | 422865 | gene=IY08_20910 | protein=serine dehydratase                          | protein_id=KGT41665.1 |
| gene | 3972745 | 3973083 | 422905 | 423243 | gene=IY08_20915 | protein=hypothetical protein                        | protein_id=KGT41666.1 |
| gene | 3973586 | 3974509 | 423746 | 424669 | gene=IY08_20920 | protein=ribonuclease Z                              | protein_id=KGT41667.1 |
| gene | 3974699 | 3974950 | 424859 | 425110 | gene=IY08_20925 | protein=hypothetical protein                        | protein_id=KGT41668.1 |
| gene | 3974986 | 3975525 | 425146 | 425685 | gene=IY08_20930 | protein=hypothetical protein                        | protein_id=KGT41669.1 |
| gene | 3976192 | 3978897 | 426352 | 429057 | gene=IY08_20935 | protein=magnesium ABC transporter ATPase            | protein_id=KGT41670.1 |
| gene | 3979146 | 3980384 | 429306 | 430544 | gene=polYA      | protein=DNA polymerase IV                           | protein_id=KGT41671.1 |
| gene | 3980636 | 3980824 | 430796 | 430984 | pseudo          |                                                     |                       |
| gene | 3980869 | 3981987 | 431029 | 432147 | gene=IY08_20955 | protein=hypothetical protein                        | protein_id=KGT41672.1 |
| gene | 3982115 | 3982660 | 432275 | 432820 | gene=IY08_20960 | protein=alanine acetyltransferase                   | protein_id=KGT41673.1 |
| gene | 3982850 | 3982942 | 433010 | 433102 | gene=IY08_20965 | protein=hypothetical protein                        | protein_id=KGT41674.1 |
| gene | 3983015 | 3983254 | 433175 | 433414 | gene=IY08_20970 | protein=hypothetical protein                        | protein_id=KGT41675.1 |
| gene | 3983321 | 3983881 | 433481 | 434041 | gene=IY08_20975 | protein=L,D-transpeptidase                          | protein_id=KGT41676.1 |
| gene | 3983898 | 3984866 | 434058 | 435026 | gene=IY08_20980 | protein=hypothetical protein                        | protein_id=KGT41677.1 |
| gene | 3984967 | 3985689 | 435127 | 435849 | gene=IY08_20985 | protein=peptide ABC transporter ATP-binding protein | protein_id=KGT41678.1 |
| gene | 3985682 | 3986341 | 435842 | 436501 | gene=IY08_20990 | protein=arginine ABC transporter permease           | protein_id=KGT41679.1 |
| gene | 3986378 | 3987157 | 436538 | 437317 | gene=IY08_20995 | protein=ABC transporter substrate-binding protein   | protein_id=KGT41680.1 |
| gene | 3987169 | 3987375 | 437329 | 437535 | pseudo          |                                                     |                       |
| gene | 3987410 | 3987823 | 437570 | 437983 | gene=IY08_21005 | protein=hypothetical protein                        | protein_id=KGT41681.1 |
| gene | 3987968 | 3988375 | 438128 | 438535 | gene=IY08_21010 | protein=5-formyltetrahydrofolate cyclo-ligase       | protein_id=KGT41682.1 |
| gene | 3988497 | 3988961 | 438657 | 439121 | gene=IY08_21015 | protein=DNA mismatch repair protein MutT            | protein_id=KGT41683.1 |
| gene | 3989032 | 3989736 | 439192 | 439896 | gene=IY08_21020 | protein=membrane protein                            | protein_id=KGT41684.1 |
| gene | 3989843 | 3991021 | 440003 | 441181 | gene=IY08_21025 | protein=cell division protein FtsW                  | protein_id=KGT41685.1 |
| gene | 3991085 | 3991258 | 441245 | 441418 | gene=IY08_21030 | protein=hypothetical protein                        | protein_id=KGT41686.1 |

|      |         |         |        |        |                 |                                                                 |                       |
|------|---------|---------|--------|--------|-----------------|-----------------------------------------------------------------|-----------------------|
| gene | 3991364 | 3992683 | 441524 | 442843 | gene=IY08_21035 | protein=branched-chain alpha-keto acid dehydrogenase subunit E2 | protein_id=KGT41687.1 |
| gene | 3992699 | 3993682 | 442859 | 443842 | gene=IY08_21040 | protein=2-oxoisovalerate dehydrogenase                          | protein_id=KGT41688.1 |
| gene | 3993696 | 3994697 | 443856 | 444857 | gene=IY08_21045 | protein=2-oxoisovalerate dehydrogenase                          | protein_id=KGT41689.1 |
| gene | 3994725 | 3996146 | 444885 | 446306 | gene=IY08_21050 | protein=dihydrolipoamide dehydrogenase                          | protein_id=KGT41690.1 |
| gene | 3996151 | 3997254 | 446311 | 447414 | gene=IY08_21055 | protein=butyrate kinase                                         | protein_id=KGT41691.1 |
| gene | 3997342 | 3998442 | 447502 | 448602 | gene=IY08_21060 | protein=leucine dehydrogenase                                   | protein_id=KGT41692.1 |
| gene | 3998477 | 3999376 | 448637 | 449536 | gene=IY08_21065 | protein=phosphate butyryltransferase                            | protein_id=KGT41693.1 |
| gene | 3999373 | 3999594 | 449533 | 449754 | gene=IY08_21070 | protein=hypothetical protein                                    | protein_id=KGT41694.1 |
| gene | 3999572 | 4001644 | 449732 | 451804 | gene=IY08_21075 | protein=ATPase AAA                                              | protein_id=KGT41695.1 |
| gene | 4001782 | 4002015 | 451942 | 452175 | gene=IY08_21080 | protein=hypothetical protein                                    | protein_id=KGT41696.1 |
| gene | 4002065 | 4002793 | 452225 | 452953 | gene=IY08_21085 | protein=hypothetical protein                                    | protein_id=KGT41697.1 |
| gene | 4002844 | 4002990 | 453004 | 453150 | gene=IY08_21090 | protein=hypothetical protein                                    | protein_id=KGT41698.1 |
| gene | 4003232 | 4003795 | 453392 | 453955 | pseudo          |                                                                 |                       |
| gene | 4004048 | 4004842 | 454208 | 455002 | gene=IY08_21100 | protein=chemotaxis protein CheY                                 | protein_id=KGT41699.1 |
| gene | 4005133 | 4006431 | 455293 | 456591 | gene=IY08_21110 | protein=peptidase S55                                           | protein_id=KGT41700.1 |
| gene | 4006550 | 4008289 | 456710 | 458449 | gene=IY08_21115 | protein=DNA recombination protein RecN                          | protein_id=KGT41701.1 |
| gene | 4008554 | 4009003 | 458714 | 459163 | gene=IY08_21120 | protein=arginine repressor                                      | protein_id=KGT41702.1 |
| gene | 4009146 | 4009985 | 459306 | 460145 | gene=IY08_21125 | protein=rRNA methyltransferase                                  | protein_id=KGT41703.1 |
| gene | 4009989 | 4011881 | 460149 | 462041 | gene=IY08_21130 | protein=1-deoxy-D-xylulose-5-phosphate synthase                 | protein_id=KGT41704.1 |
| gene | 4012183 | 4013073 | 462343 | 463233 | gene=IY08_21135 | protein=farnesyl-diphosphate synthase                           | protein_id=KGT41705.1 |
| gene | 4013073 | 4013303 | 463233 | 463463 | gene=IY08_21140 | protein=exodeoxyribonuclease VII small subunit                  | protein_id=KGT41706.1 |
| gene | 4013293 | 4014651 | 463453 | 464811 | gene=IY08_21145 | protein=exodeoxyribonuclease VII large subunit                  | protein_id=KGT41707.1 |
| gene | 4014678 | 4015538 | 464838 | 465698 | gene=IY08_21150 | protein=5,10-methylene-tetrahydrofolate cyclohydrolase          | protein_id=KGT41708.1 |
| gene | 4015562 | 4015954 | 465722 | 466114 | gene=IY08_21155 | protein=antitermination protein NusB                            | protein_id=KGT41709.1 |
| gene | 4016301 | 4016693 | 466461 | 466853 | gene=IY08_21160 | protein=hypothetical protein                                    | protein_id=KGT41710.1 |
| gene | 4016716 | 4018068 | 466876 | 468228 | gene=IY08_21165 | protein=acetyl-CoA carboxylase                                  | protein_id=KGT41711.1 |
| gene | 4018085 | 4018573 | 468245 | 468733 | gene=IY08_21170 | protein=acetyl-CoA carboxylase                                  | protein_id=KGT41712.1 |
| gene | 4019036 | 4019230 | 469196 | 469390 | gene=IY08_21175 | protein=DNA recombination protein RecO                          | protein_id=KGT41713.1 |
| gene | 4019344 | 4019988 | 469504 | 470148 | gene=IY08_21180 | protein=stage III sporulation protein AH                        | protein_id=KGT41714.1 |
| gene | 4020004 | 4020666 | 470164 | 470826 | gene=IY08_21185 | protein=stage III sporulation protein AG                        | protein_id=KGT41715.1 |

|      |         |         |        |        |                 |                                                       |                       |
|------|---------|---------|--------|--------|-----------------|-------------------------------------------------------|-----------------------|
| gene | 4020656 | 4021288 | 470816 | 471448 | gene=IY08_21190 | protein=stage III sporulation protein AF              | protein_id=KGT41716.1 |
| gene | 4021301 | 4022473 | 471461 | 472633 | gene=IY08_21195 | protein=stage III sporulation protein AE              | protein_id=KGT41717.1 |
| gene | 4022484 | 4022762 | 472644 | 472922 | gene=IY08_21200 | protein=stage III sporulation protein AD              | protein_id=KGT41718.1 |
| gene | 4022891 | 4023094 | 473051 | 473254 | gene=IY08_21205 | protein=stage III sporulation protein AC              | protein_id=KGT41719.1 |
| gene | 4023109 | 4023624 | 473269 | 473784 | gene=IY08_21210 | protein=stage III sporulation protein AB              | protein_id=KGT41720.1 |
| gene | 4023618 | 4024544 | 473778 | 474704 | gene=IY08_21215 | protein=stage III sporulation protein AA              | protein_id=KGT41721.1 |
| gene | 4024572 | 4024853 | 474732 | 475013 | gene=IY08_21220 | protein=hypothetical protein                          | protein_id=KGT41722.1 |
| gene | 4025045 | 4025623 | 475205 | 475783 | gene=IY08_21225 | protein=GNAT family acetyltransferase                 | protein_id=KGT41723.1 |
| gene | 4025604 | 4025924 | 475764 | 476084 | gene=IY08_21230 | protein=hypothetical protein                          | protein_id=KGT41724.1 |
| gene | 4025961 | 4026518 | 476121 | 476678 | gene=IY08_21235 | protein=elongation factor P                           | protein_id=KGT41725.1 |
| gene | 4026540 | 4027601 | 476700 | 477761 | gene=IY08_21240 | protein=Xaa-Pro dipeptidase                           | protein_id=KGT41726.1 |
| gene | 4027606 | 4028046 | 477766 | 478206 | gene=IY08_21245 | protein=3-dehydroquinate dehydratase                  | protein_id=KGT41727.1 |
| gene | 4028126 | 4028587 | 478286 | 478747 | gene=IY08_21250 | protein=hypothetical protein                          | protein_id=KGT41728.1 |
| gene | 4028832 | 4029752 | 478992 | 479912 | gene=IY08_21255 | protein=membrane protein                              | protein_id=KGT41729.1 |
| gene | 4029832 | 4030233 | 479992 | 480393 | gene=IY08_21260 | protein=membrane protein                              | protein_id=KGT41730.1 |
| gene | 4030230 | 4030892 | 480390 | 481052 | gene=IY08_21265 | protein=HAD family hydrolase                          | protein_id=KGT41731.1 |
| gene | 4030947 | 4031375 | 481107 | 481535 | gene=IY08_21270 | protein=manganese transport transcriptional regulator | protein_id=KGT41732.1 |
| gene | 4031956 | 4032273 | 482116 | 482433 | gene=IY08_21275 | protein=PadR family transcriptional regulator         | protein_id=KGT41733.1 |
| gene | 4032279 | 4032950 | 482439 | 483110 | gene=IY08_21280 | protein=hypothetical protein                          | protein_id=KGT41734.1 |
| gene | 4033152 | 4033994 | 483312 | 484154 | gene=IY08_21285 | protein=hypothetical protein                          | protein_id=KGT41735.1 |
| gene | 4034023 | 4034859 | 484183 | 485019 | gene=IY08_21290 | protein=octanoyltransferase                           | protein_id=KGT41736.1 |
| gene | 4035030 | 4035413 | 485190 | 485573 | gene=IY08_21295 | protein=hypothetical protein                          | protein_id=KGT41737.1 |
| gene | 4035454 | 4035930 | 485614 | 486090 | gene=IY08_21300 | protein=DNA polymerase III subunit delta              | protein_id=KGT41738.1 |
| gene | 4036245 | 4037222 | 486405 | 487382 | gene=IY08_21305 | protein=LacI family transcriptional regulator         | protein_id=KGT41739.1 |
| gene | 4037319 | 4037900 | 487479 | 488060 | gene=IY08_21310 | protein=TetR family transcriptional regulator         | protein_id=KGT41740.1 |
| gene | 4037971 | 4038303 | 488131 | 488463 | gene=IY08_21315 | protein=multidrug resistance protein SMR              | protein_id=KGT41741.1 |
| gene | 4038305 | 4038619 | 488465 | 488779 | gene=IY08_21320 | protein=transporter                                   | protein_id=KGT41742.1 |
| gene | 4038635 | 4038892 | 488795 | 489052 | gene=IY08_21325 | protein=hypothetical protein                          | protein_id=KGT41743.1 |
| gene | 4038909 | 4039097 | 489069 | 489257 | gene=IY08_21330 | protein=hypothetical protein                          | protein_id=KGT41744.1 |
| gene | 4039167 | 4039316 | 489327 | 489476 | gene=IY08_21335 | protein=hypothetical protein                          | protein_id=KGT41745.1 |
| gene | 4039343 | 4039939 | 489503 | 490099 | gene=IY08_21340 | protein=ABC transporter permease                      | protein_id=KGT41746.1 |

|      |         |         |        |        |                 |                                                    |                       |
|------|---------|---------|--------|--------|-----------------|----------------------------------------------------|-----------------------|
| gene | 4039972 | 4040604 | 490132 | 490764 | gene=IY08_21345 | protein=ABC transporter substrate-binding protein  | protein_id=KGT41747.1 |
| gene | 4040619 | 4041287 | 490779 | 491447 | gene=IY08_21350 | protein=ABC transporter permease                   | protein_id=KGT41748.1 |
| gene | 4041268 | 4042140 | 491428 | 492300 | gene=IY08_21355 | protein=sodium ABC transporter ATP-binding protein | protein_id=KGT41749.1 |
| gene | 4042146 | 4042520 | 492306 | 492680 | gene=IY08_21360 | protein=GntR family transcriptional regulator      | protein_id=KGT41750.1 |
| gene | 4042639 | 4042830 | 492799 | 492990 | gene=IY08_21365 | protein=glycosyltransferase                        | protein_id=KGT41751.1 |
| gene | 4042901 | 4043125 | 493061 | 493285 | gene=IY08_21370 | protein=hypothetical protein                       | protein_id=KGT41752.1 |
| gene | 4043527 | 4045002 | 493687 | 495162 | gene=IY08_21375 | protein=glycine dehydrogenase                      | protein_id=KGT41753.1 |
| gene | 4044999 | 4046342 | 495159 | 496502 | gene=IY08_21380 | protein=glycine dehydrogenase                      | protein_id=KGT41754.1 |
| gene | 4046363 | 4047463 | 496523 | 497623 | gene=IY08_21385 | protein=glycine cleavage system protein T          | protein_id=KGT41755.1 |
| gene | 4047854 | 4049536 | 498014 | 499696 | gene=IY08_21390 | protein=ATP-dependent helicase                     | protein_id=KGT41756.1 |
| gene | 4049523 | 4050320 | 499683 | 500480 | gene=IY08_21395 | protein=hypothetical protein                       | protein_id=KGT41757.1 |
| gene | 4050356 | 4050487 | 500516 | 500647 | gene=IY08_21400 | protein=hypothetical protein                       | protein_id=KGT41758.1 |
| gene | 4050585 | 4050812 | 500745 | 500972 | gene=IY08_21405 | protein=hypothetical protein                       | protein_id=KGT41759.1 |
| gene | 4051144 | 4051776 | 501304 | 501936 | gene=IY08_21410 | protein=membrane protein                           | protein_id=KGT41760.1 |
| gene | 4051842 | 4052042 | 502002 | 502202 | gene=IY08_21415 | protein=hypothetical protein                       | protein_id=KGT41761.1 |
| gene | 4052081 | 4052578 | 502241 | 502738 | gene=IY08_21420 | protein=shikimate kinase                           | protein_id=KGT41762.1 |
| gene | 4052694 | 4053344 | 502854 | 503504 | gene=IY08_21425 | protein=2OG-Fe(II) oxygenase                       | protein_id=KGT41763.1 |
| gene | 4053521 | 4053892 | 503681 | 504052 | gene=IY08_21430 | protein=competence protein ComG                    | protein_id=KGT41764.1 |
| gene | 4053889 | 4054359 | 504049 | 504519 | gene=IY08_21435 | protein=competence protein ComG                    | protein_id=KGT41765.1 |
| gene | 4054329 | 4054631 | 504489 | 504791 | gene=IY08_21440 | protein=competence protein ComG                    | protein_id=KGT41766.1 |
| gene | 4054624 | 4055079 | 504784 | 505239 | gene=IY08_21445 | protein=competence protein ComG                    | protein_id=KGT41767.1 |
| gene | 4055076 | 4055375 | 505236 | 505535 | gene=IY08_21450 | protein=competence protein ComG                    | protein_id=KGT41768.1 |
| gene | 4055387 | 4056418 | 505547 | 506578 | gene=IY08_21455 | protein=competence protein ComG                    | protein_id=KGT41769.1 |
| gene | 4056411 | 4057454 | 506571 | 507614 | gene=IY08_21460 | protein=competence protein ComG                    | protein_id=KGT41770.1 |
| gene | 4057660 | 4058355 | 507820 | 508515 | gene=IY08_21465 | protein=transcriptional regulator                  | protein_id=KGT41771.1 |
| gene | 4058481 | 4058723 | 508641 | 508883 | gene=IY08_21470 | protein=membrane protein                           | protein_id=KGT41772.1 |
| gene | 4058830 | 4060224 | 508990 | 510384 | gene=IY08_21475 | protein=sodium:dicarboxylate symporter             | protein_id=KGT41773.1 |
| gene | 4060304 | 4060696 | 510464 | 510856 | gene=IY08_21480 | protein=DoxX                                       | protein_id=KGT41774.1 |
| gene | 4060784 | 4060999 | 510944 | 511159 | gene=IY08_21485 | protein=hypothetical protein                       | protein_id=KGT41775.1 |
| gene | 4061252 | 4061563 | 511412 | 511723 | gene=IY08_21490 | protein=hypothetical protein                       | protein_id=KGT41776.1 |
| gene | 4061598 | 4062086 | 511758 | 512246 | gene=IY08_21495 | protein=hypothetical protein                       | protein_id=KGT41777.1 |

|      |         |         |        |        |                 |                                                                                 |                       |
|------|---------|---------|--------|--------|-----------------|---------------------------------------------------------------------------------|-----------------------|
| gene | 4062166 | 4062540 | 512326 | 512700 | gene=IY08_21500 | protein=group-specific protein                                                  | protein_id=KGT41778.1 |
| gene | 4062636 | 4062896 | 512796 | 513056 | gene=IY08_21505 | protein=hypothetical protein                                                    | protein_id=KGT41779.1 |
| gene | 4063091 | 4064149 | 513251 | 514309 | gene=IY08_21510 | protein=UDP-diphospho-muramoylpentapeptide beta-N-acetylglucosaminyltransferase | protein_id=KGT41780.1 |
| gene | 4064168 | 4067566 | 514328 | 517726 | gene=IY08_21515 | protein=5-methyltetrahydrofolate--homocysteine methyltransferase                | protein_id=KGT41781.1 |
| gene | 4067566 | 4069398 | 517726 | 519558 | gene=IY08_21520 | protein=homocysteine methyltransferase                                          | protein_id=KGT41782.1 |
| gene | 4069460 | 4069714 | 519620 | 519874 | gene=IY08_21525 | protein=hypothetical protein                                                    | protein_id=KGT41783.1 |
| gene | 4069987 | 4071099 | 520147 | 521259 | gene=IY08_21530 | protein=cystathionine gamma-synthase                                            | protein_id=KGT41784.1 |
| gene | 4071096 | 4072259 | 521256 | 522419 | gene=IY08_21535 | protein=cystathionine gamma-synthase                                            | protein_id=KGT41785.1 |
| gene | 4072428 | 4072939 | 522588 | 523099 | pseudo          |                                                                                 |                       |
| gene | 4073373 | 4073663 | 523533 | 523823 | gene=IY08_21545 | protein=ArsR family transcriptional regulator                                   | protein_id=KGT41786.1 |
| gene | 4073806 | 4074918 | 523966 | 525078 | gene=IY08_21550 | protein=cytoplasmic protein                                                     | protein_id=KGT41787.1 |
| gene | 4074928 | 4075557 | 525088 | 525717 | gene=IY08_21555 | protein=hypothetical protein                                                    | protein_id=KGT41788.1 |
| gene | 4075728 | 4075901 | 525888 | 526061 | gene=IY08_21560 | protein=membrane protein                                                        | protein_id=KGT41789.1 |
| gene | 4075982 | 4076965 | 526142 | 527125 | gene=IY08_21565 | protein=glucokinase                                                             | protein_id=KGT41790.1 |
| gene | 4076985 | 4077185 | 527145 | 527345 | gene=IY08_21570 | protein=cytoplasmic protein                                                     | protein_id=KGT41791.1 |
| gene | 4077289 | 4077867 | 527449 | 528027 | gene=IY08_21575 | protein=hypothetical protein                                                    | protein_id=KGT41792.1 |
| gene | 4077973 | 4078122 | 528133 | 528282 | gene=IY08_21580 | protein=50S ribosomal protein L33                                               | protein_id=KGT41793.1 |
| gene | 4078192 | 4080546 | 528352 | 530706 | gene=IY08_21585 | protein=nucleotidyltransferase                                                  | protein_id=KGT41794.1 |
| gene | 4080886 | 4081542 | 531046 | 531702 | gene=IY08_21590 | protein=PhoU family transcriptional regulator                                   | protein_id=KGT41795.1 |
| gene | 4081730 | 4082545 | 531890 | 532705 | gene=IY08_21595 | protein=phosphate ABC transporter ATP-binding protein                           | protein_id=KGT41796.1 |
| gene | 4082574 | 4083440 | 532734 | 533600 | gene=IY08_21600 | protein=phosphate ABC transporter permease                                      | protein_id=KGT41797.1 |
| gene | 4083442 | 4084392 | 533602 | 534552 | gene=IY08_21605 | protein=phosphate ABC transporter permease                                      | protein_id=KGT41798.1 |
| gene | 4084420 | 4085337 | 534580 | 535497 | gene=IY08_21610 | protein=phosphate ABC transporter substrate-binding                             | protein_id=KGT41799.1 |
| gene | 4085669 | 4087795 | 535829 | 537955 | gene=IY08_21615 | protein=penicillin-binding protein                                              | protein_id=KGT41800.1 |
| gene | 4087905 | 4089182 | 538065 | 539342 | gene=IY08_21620 | protein=hypothetical protein                                                    | protein_id=KGT41801.1 |
| gene | 4089299 | 4089910 | 539459 | 540070 | gene=IY08_21625 | protein=superoxide dismutase                                                    | protein_id=KGT41802.1 |
| gene | 4090132 | 4090205 | 540292 | 540365 | tRNA            |                                                                                 |                       |
| gene | 4090447 | 4091205 | 540607 | 541365 | gene=IY08_21640 | protein=hypothetical protein                                                    | protein_id=KGT41803.1 |
| gene | 4091278 | 4091643 | 541438 | 541803 | gene=IY08_21645 | protein=hypothetical protein                                                    | protein_id=KGT41804.1 |

|      |         |         |        |        |                 |                                                     |                       |
|------|---------|---------|--------|--------|-----------------|-----------------------------------------------------|-----------------------|
| gene | 4091799 | 4092911 | 541959 | 543071 | gene=IY08_21650 | protein=4-hydroxy-3-methylbut-2-en-1-yl diphosphate | protein_id=KGT41805.1 |
| gene | 4092988 | 4093401 | 543148 | 543561 | gene=IY08_21655 | protein=Fur family transcriptional regulator        | protein_id=KGT41806.1 |
| gene | 4093415 | 4094248 | 543575 | 544408 | gene=IY08_21660 | protein=metal ABC transporter permease              | protein_id=KGT41807.1 |
| gene | 4094248 | 4095018 | 544408 | 545178 | gene=IY08_21665 | protein=zinc ABC transporter ATP-binding protein    | protein_id=KGT41808.1 |
| gene | 4095199 | 4096077 | 545359 | 546237 | gene=IY08_21670 | protein=membrane protein                            | protein_id=KGT41809.1 |
| gene | 4096227 | 4096481 | 546387 | 546641 | gene=IY08_21675 | protein=tRNA methyltransferase                      | protein_id=KGT41810.1 |
| gene | 4096501 | 4097397 | 546661 | 547557 | gene=IY08_21680 | protein=endonuclease IV                             | protein_id=KGT41811.1 |
| gene | 4097630 | 4098940 | 547790 | 549100 | gene=IY08_21685 | protein=DEAD/DEAH box helicase                      | protein_id=KGT41812.1 |
| gene | 4099122 | 4099859 | 549282 | 550019 | gene=IY08_21690 | protein=VrrA protein                                | protein_id=KGT41813.1 |
| gene | 4099949 | 4100899 | 550109 | 551059 | gene=IY08_21695 | protein=4-hydroxy-3-methylbut-2-enyl diphosphate    | protein_id=KGT41814.1 |
| gene | 4100941 | 4102062 | 551101 | 552222 | gene=IY08_21700 | protein=hypothetical protein                        | protein_id=KGT41815.1 |
| gene | 4102059 | 4102766 | 552219 | 552926 | gene=IY08_21705 | protein=SAM-dependent methyltransferase             | protein_id=KGT41816.1 |
| gene | 4102932 | 4103288 | 553092 | 553448 | gene=IY08_21710 | protein=cytochrome C                                | protein_id=KGT41817.1 |
| gene | 4103675 | 4104802 | 553835 | 554962 | gene=IY08_21715 | protein=RNA polymerase sigma factor RpoD            | protein_id=KGT41818.1 |
| gene | 4104862 | 4106658 | 555022 | 556818 | gene=IY08_21720 | protein=DNA primase                                 | protein_id=KGT41819.1 |
| gene | 4107020 | 4107151 | 557180 | 557311 | gene=IY08_21730 | protein=hypothetical protein                        | protein_id=KGT41820.1 |
| gene | 4107519 | 4108331 | 557679 | 558491 | gene=IY08_21740 | protein=phosphotransferase                          | protein_id=KGT41821.1 |
| gene | 4108361 | 4108996 | 558521 | 559156 | gene=IY08_21745 | protein=transcriptional repressor CcpN              | protein_id=KGT41822.1 |
| gene | 4109101 | 4109847 | 559261 | 560007 | gene=IY08_21750 | protein=DNA recombination protein RecO              | protein_id=KGT41823.1 |
| gene | 4109881 | 4110024 | 560041 | 560184 | gene=IY08_21755 | protein=hypothetical protein                        | protein_id=KGT41824.1 |
| gene | 4110201 | 4111106 | 560361 | 561266 | gene=era        | protein=GTPase Era                                  | protein_id=KGT41825.1 |
| gene | 4111099 | 4111497 | 561259 | 561657 | gene=IY08_21765 | protein=cytidine deaminase                          | protein_id=KGT41826.1 |
| gene | 4111597 | 4111950 | 561757 | 562110 | gene=IY08_21770 | protein=diacylglycerol kinase                       | protein_id=KGT41827.1 |
| gene | 4111947 | 4112417 | 562107 | 562577 | gene=IY08_21775 | protein=rRNA maturation factor                      | protein_id=KGT41828.1 |
| gene | 4112414 | 4114558 | 562574 | 564718 | gene=IY08_21780 | protein=membrane protein                            | protein_id=KGT41829.1 |
| gene | 4114753 | 4115712 | 564913 | 565872 | gene=IY08_21785 | protein=phosphate starvation protein PhoH           | protein_id=KGT41830.1 |
| gene | 4115716 | 4116915 | 565876 | 567075 | gene=IY08_21790 | protein=stage IV sporulation protein                | protein_id=KGT41831.1 |
| gene | 4116905 | 4117015 | 567065 | 567175 | gene=IY08_21795 | protein=hypothetical protein                        | protein_id=KGT42383.1 |
| gene | 4117077 | 4117370 | 567237 | 567530 | gene=IY08_21800 | protein=sporulation protein YqfC                    | protein_id=KGT41832.1 |
| gene | 4117934 | 4118185 | 568094 | 568345 | gene=IY08_21805 | protein=hypothetical protein                        | protein_id=KGT42384.1 |
| gene | 4118289 | 4118732 | 568449 | 568892 | gene=IY08_21810 | protein=hypothetical protein                        | protein_id=KGT41833.1 |

|      |         |         |        |        |                 |                                                         |                       |
|------|---------|---------|--------|--------|-----------------|---------------------------------------------------------|-----------------------|
| gene | 4118748 | 4118921 | 568908 | 569081 | gene=IY08_21815 | protein=30S ribosomal protein S21                       | protein_id=KGT41834.1 |
| gene | 4119242 | 4120594 | 569402 | 570754 | gene=IY08_21820 | protein=30S ribosomal protein S12 methylthiotransferase | protein_id=KGT41835.1 |
| gene | 4120601 | 4121350 | 570761 | 571510 | gene=IY08_21825 | protein=16S rRNA methyltransferase                      | protein_id=KGT41836.1 |
| gene | 4121495 | 4122433 | 571655 | 572593 | gene=IY08_21830 | protein=ribosomal protein L11 methyltransferase         | protein_id=KGT41837.1 |
| gene | 4122462 | 4123577 | 572622 | 573737 | gene=IY08_21835 | protein=molecular chaperone DnaJ                        | protein_id=KGT41838.1 |
| gene | 4123782 | 4125617 | 573942 | 575777 | gene=dnaK       | protein=molecular chaperone DnaK                        | protein_id=KGT41839.1 |
| gene | 4125644 | 4126210 | 575804 | 576370 | gene=IY08_21845 | protein=heat shock protein GrpE                         | protein_id=KGT41840.1 |
| gene | 4126325 | 4127341 | 576485 | 577501 | gene=IY08_21850 | protein=HrcA family transcriptional regulator           | protein_id=KGT41841.1 |
| gene | 4127475 | 4128614 | 577635 | 578774 | gene=IY08_21855 | protein=coproporphyrinogen III oxidase                  | protein_id=KGT41842.1 |
| gene | 4128666 | 4129040 | 578826 | 579200 | gene=IY08_21860 | protein=HxlR family transcriptional regulator           | protein_id=KGT41843.1 |
| gene | 4129171 | 4130994 | 579331 | 581154 | gene=IY08_21865 | protein=elongation factor 4                             | protein_id=KGT41844.1 |
| gene | 4131205 | 4131570 | 581365 | 581730 | gene=IY08_21870 | protein=transcriptional regulator                       | protein_id=KGT41845.1 |
| gene | 4131567 | 4132670 | 581727 | 582830 | gene=IY08_21875 | protein=peptidase                                       | protein_id=KGT41846.1 |
| gene | 4132851 | 4133108 | 583011 | 583268 | gene=IY08_21880 | protein=30S ribosomal protein S20                       | protein_id=KGT41847.1 |
| gene | 4133192 | 4134202 | 583352 | 584362 | gene=IY08_21885 | protein=DNA polymerase III subunit delta                | protein_id=KGT41848.1 |
| gene | 4134549 | 4134683 | 584709 | 584843 | gene=IY08_21890 | protein=membrane protein                                | protein_id=KGT41849.1 |
| gene | 4134715 | 4137036 | 584875 | 587196 | gene=IY08_21895 | protein=competence protein ComEC                        | protein_id=KGT41850.1 |
| gene | 4137051 | 4137608 | 587211 | 587768 | gene=IY08_21900 | protein=competence protein ComE                         | protein_id=KGT41851.1 |
| gene | 4137672 | 4138271 | 587832 | 588431 | gene=IY08_21905 | protein=competence protein ComE                         | protein_id=KGT41852.1 |
| gene | 4138349 | 4139176 | 588509 | 589336 | gene=IY08_21910 | protein=competence protein                              | protein_id=KGT41853.1 |
| gene | 4139348 | 4140097 | 589508 | 590257 | gene=IY08_21915 | protein=methyltransferase                               | protein_id=KGT41854.1 |
| gene | 4140094 | 4140450 | 590254 | 590610 | gene=IY08_21920 | protein=ribosomal silencing factor RsfS                 | protein_id=KGT41855.1 |
| gene | 4140447 | 4141016 | 590607 | 591176 | gene=IY08_21925 | protein=phosphohydrolase                                | protein_id=KGT41856.1 |
| gene | 4141006 | 4141575 | 591166 | 591735 | gene=IY08_21930 | protein=nicotinate-nucleotide adenylyltransferase       | protein_id=KGT41857.1 |
| gene | 4141713 | 4142006 | 591873 | 592166 | gene=IY08_21935 | protein=RNA-binding protein                             | protein_id=KGT41858.1 |
| gene | 4142012 | 4142845 | 592172 | 593005 | gene=IY08_21940 | protein=shikimate dehydrogenase                         | protein_id=KGT41859.1 |
| gene | 4142861 | 4143967 | 593021 | 594127 | gene=IY08_21945 | protein=GTPase                                          | protein_id=KGT41860.1 |
| gene | 4143971 | 4144483 | 594131 | 594643 | gene=IY08_21950 | protein=hypothetical protein                            | protein_id=KGT41861.1 |
| gene | 4144730 | 4144885 | 594890 | 595045 | gene=IY08_21955 | protein=Sporulation inhibitor sda                       | protein_id=KGT41862.1 |
| gene | 4145071 | 4145859 | 595231 | 596019 | gene=IY08_21960 | protein=phosphatidylserine decarboxylase                | protein_id=KGT41863.1 |
| gene | 4146149 | 4146862 | 596309 | 597022 | gene=IY08_21965 | protein=sporulation sigma factor SigK                   | protein_id=KGT41864.1 |

|      |         |         |        |        |                 |                                                                    |                       |
|------|---------|---------|--------|--------|-----------------|--------------------------------------------------------------------|-----------------------|
| gene | 4147045 | 4147935 | 597205 | 598095 | gene=IY08_21970 | protein=hypothetical protein                                       | protein_id=KGT41865.1 |
| gene | 4147979 | 4149472 | 598139 | 599632 | gene=IY08_21975 | protein=cytoplasmic protein                                        | protein_id=KGT41866.1 |
| gene | 4149561 | 4149710 | 599721 | 599870 | gene=IY08_21980 | protein=50S ribosomal protein L33                                  | protein_id=KGT41867.1 |
| gene | 4149907 | 4150533 | 600067 | 600693 | gene=IY08_21985 | protein=NAD(P)H nitroreductase                                     | protein_id=KGT41868.1 |
| gene | 4150883 | 4151533 | 601043 | 601693 | gene=IY08_21990 | protein=GTP pyrophosphokinase                                      | protein_id=KGT41869.1 |
| gene | 4151611 | 4152078 | 601771 | 602238 | gene=IY08_21995 | protein=lipoprotein                                                | protein_id=KGT41870.1 |
| gene | 4152133 | 4153518 | 602293 | 603678 | gene=IY08_22000 | protein=alkaline phosphatase                                       | protein_id=KGT41871.1 |
| gene | 4153780 | 4154613 | 603940 | 604773 | gene=IY08_22005 | protein=acetyltransferase                                          | protein_id=KGT41872.1 |
| gene | 4154629 | 4155513 | 604789 | 605673 | gene=IY08_22010 | protein=alpha/beta hydrolase                                       | protein_id=KGT41873.1 |
| gene | 4155555 | 4156055 | 605715 | 606215 | gene=IY08_22015 | protein=DoxX family protein                                        | protein_id=KGT41874.1 |
| gene | 4156320 | 4156856 | 606480 | 607016 | gene=IY08_22020 | protein=delta-aminolevulinic acid dehydratase                      | protein_id=KGT41875.1 |
| gene | 4156875 | 4157477 | 607035 | 607637 | gene=IY08_22025 | protein=phosphoglycerate mutase                                    | protein_id=KGT41876.1 |
| gene | 4157646 | 4157984 | 607806 | 608144 | gene=IY08_22030 | protein=phosphoglycerate mutase                                    | protein_id=KGT41877.1 |
| gene | 4158054 | 4158176 | 608214 | 608336 | gene=IY08_22035 | protein=HemX protein                                               | protein_id=KGT41878.1 |
| gene | 4158368 | 4158898 | 608528 | 609058 | gene=IY08_22040 | protein=hypothetical protein                                       | protein_id=KGT41879.1 |
| gene | 4159770 | 4161524 | 609930 | 611684 | gene=IY08_22050 | protein=phenylalanine 4-monooxygenase                              | protein_id=KGT41880.1 |
| gene | 4161505 | 4161819 | 611665 | 611979 | gene=IY08_22055 | protein=pterin-4-alpha-carbinolamine dehydratase                   | protein_id=KGT41881.1 |
| gene | 4161835 | 4162692 | 611995 | 612852 | gene=IY08_22060 | protein=glyoxalase                                                 | protein_id=KGT41882.1 |
| gene | 4162714 | 4163118 | 612874 | 613278 | gene=IY08_22065 | protein=DoxX                                                       | protein_id=KGT41883.1 |
| gene | 4163275 | 4163820 | 613435 | 613980 | gene=IY08_22070 | protein=DNA-binding protein                                        | protein_id=KGT41884.1 |
| gene | 4163857 | 4164234 | 614017 | 614394 | gene=IY08_22075 | protein=enoyl-CoA hydratase                                        | protein_id=KGT41885.1 |
| gene | 4164353 | 4164811 | 614513 | 614971 | gene=IY08_22080 | protein=acetyltransferase                                          | protein_id=KGT41886.1 |
| gene | 4164868 | 4165374 | 615028 | 615534 | gene=IY08_22085 | protein=acetyltransferase                                          | protein_id=KGT41887.1 |
| gene | 4165682 | 4166077 | 615842 | 616237 | gene=IY08_22090 | protein=ankyrin                                                    | protein_id=KGT41888.1 |
| gene | 4166044 | 4166862 | 616204 | 617022 | gene=IY08_22095 | protein=iron ABC transporter ATP-binding protein                   | protein_id=KGT41889.1 |
| gene | 4166849 | 4167877 | 617009 | 618037 | gene=IY08_22100 | protein=iron ABC transporter permease                              | protein_id=KGT41890.1 |
| gene | 4167882 | 4168829 | 618042 | 618989 | gene=IY08_22105 | protein=iron-hydroxamate ABC transporter substrate-binding protein | protein_id=KGT41891.1 |
| gene | 4168987 | 4169214 | 619147 | 619374 | gene=IY08_22110 | protein=membrane protein                                           | protein_id=KGT41892.1 |
| gene | 4169342 | 4171945 | 619502 | 622105 | gene=IY08_22115 | protein=acetaldehyde dehydrogenase                                 | protein_id=KGT41893.1 |
| gene | 4172210 | 4173343 | 622370 | 623503 | gene=IY08_22120 | protein=cystathionine gamma-synthase                               | protein_id=KGT41894.1 |



|      |         |         |        |        |                 |                                               |                       |
|------|---------|---------|--------|--------|-----------------|-----------------------------------------------|-----------------------|
| gene | 4173347 | 4174270 | 623507 | 624430 | gene=IY08_22125 | protein=cysteine synthase                     | protein_id=KGT41895.1 |
| gene | 4174353 | 4175048 | 624513 | 625208 | gene=IY08_22130 | protein=5'-methylthioadenosine nucleosidase   | protein_id=KGT41896.1 |
| gene | 4175063 | 4175701 | 625223 | 625861 | gene=IY08_22135 | protein=SAM-dependent methyltransferase       | protein_id=KGT41897.1 |
| gene | 4175838 | 4176053 | 625998 | 626213 | gene=IY08_22140 | protein=hypothetical protein                  | protein_id=KGT41898.1 |
| gene | 4176088 | 4176750 | 626248 | 626910 | gene=IY08_22145 | protein=FMN-dependent NADH-azoreductase       | protein_id=KGT41899.1 |
| gene | 4176867 | 4178621 | 627027 | 628781 | gene=IY08_22150 | protein=penicillin-binding protein            | protein_id=KGT41900.1 |
| gene | 4178709 | 4179389 | 628869 | 629549 | gene=IY08_22155 | protein=hypothetical protein                  | protein_id=KGT41901.1 |
| gene | 4179670 | 4180146 | 629830 | 630306 | gene=IY08_22160 | protein=transcription elongation factor GreA  | protein_id=KGT41902.1 |
| gene | 4180426 | 4181064 | 630586 | 631224 | gene=IY08_22165 | protein=uridine kinase                        | protein_id=KGT41903.1 |
| gene | 4181082 | 4182362 | 631242 | 632522 | gene=IY08_22170 | protein=protease                              | protein_id=KGT41904.1 |
| gene | 4182381 | 4183310 | 632541 | 633470 | gene=IY08_22175 | protein=peptidase U32                         | protein_id=KGT41905.1 |
| gene | 4183318 | 4183959 | 633478 | 634119 | gene=IY08_22180 | protein=SAM-dependent methyltransferase       | protein_id=KGT41906.1 |
| gene | 4184166 | 4185233 | 634326 | 635393 | gene=IY08_22185 | protein=hypothetical protein                  | protein_id=KGT41907.1 |
| gene | 4185457 | 4185735 | 635617 | 635895 | gene=IY08_22190 | protein=hypothetical protein                  | protein_id=KGT41908.1 |
| gene | 4185748 | 4186161 | 635908 | 636321 | gene=IY08_22195 | protein=Holliday junction resolvase           | protein_id=KGT41909.1 |
| gene | 4186165 | 4186431 | 636325 | 636591 | gene=IY08_22200 | protein=hypothetical protein                  | protein_id=KGT41910.1 |
| gene | 4186508 | 4189150 | 636668 | 639310 | gene=alaS       | protein=alanine--tRNA ligase                  | protein_id=KGT41911.1 |
| gene | 4189651 | 4189995 | 639811 | 640155 | gene=IY08_22210 | protein=hypothetical protein                  | protein_id=KGT41912.1 |
| gene | 4190040 | 4191107 | 640200 | 641267 | gene=IY08_22215 | protein=membrane protein                      | protein_id=KGT41913.1 |
| gene | 4191284 | 4191496 | 641444 | 641656 | gene=IY08_22220 | protein=hypothetical protein                  | protein_id=KGT41914.1 |
| gene | 4191543 | 4191671 | 641703 | 641831 | gene=IY08_22225 | protein=succinate dehydrogenase               | protein_id=KGT41915.1 |
| gene | 4191690 | 4191878 | 641850 | 642038 | gene=IY08_22230 | protein=hypothetical protein                  | protein_id=KGT41916.1 |
| gene | 4192008 | 4194344 | 642168 | 644504 | gene=IY08_22235 | protein=hypothetical protein                  | protein_id=KGT41917.1 |
| gene | 4194440 | 4195099 | 644600 | 645259 | gene=IY08_22240 | protein=TPR repeat-containing protein YrrB    | protein_id=KGT41918.1 |
| gene | 4195209 | 4196324 | 645369 | 646484 | gene=IY08_22245 | protein=thiouridylase                         | protein_id=KGT41919.1 |
| gene | 4196341 | 4197486 | 646501 | 647646 | gene=IY08_22250 | protein=cysteine desulfurase                  | protein_id=KGT41920.1 |
| gene | 4197522 | 4197938 | 647682 | 648098 | gene=IY08_22255 | protein=Rrf2 family transcriptional regulator | protein_id=KGT41921.1 |
| gene | 4198232 | 4199518 | 648392 | 649678 | gene=IY08_22260 | protein=recombinase RarA                      | protein_id=KGT41922.1 |
| gene | 4199556 | 4200197 | 649716 | 650357 | gene=IY08_22265 | protein=transcriptional regulator             | protein_id=KGT41923.1 |
| gene | 4200446 | 4200628 | 650606 | 650788 | gene=IY08_22270 | protein=hypothetical protein                  | protein_id=KGT41924.1 |
| gene | 4200674 | 4201441 | 650834 | 651601 | gene=IY08_22275 | protein=hypothetical protein                  | protein_id=KGT41925.1 |

|      |         |         |        |        |                 |                                                                                |                       |
|------|---------|---------|--------|--------|-----------------|--------------------------------------------------------------------------------|-----------------------|
| gene | 4201783 | 4203558 | 651943 | 653718 | gene=aspS       | protein=aspartate--tRNA ligase                                                 | protein_id=KGT41926.1 |
| gene | 4203571 | 4204842 | 653731 | 655002 | gene=IY08_22285 | protein=histidyl-tRNA synthetase                                               | protein_id=KGT41927.1 |
| gene | 4205197 | 4205373 | 655357 | 655533 | gene=IY08_22290 | protein=RNA polymerase subunit sigma-70                                        | protein_id=KGT41928.1 |
| gene | 4205539 | 4205979 | 655699 | 656139 | gene=IY08_22295 | protein=D-tyrosyl-tRNA(Tyr) deacylase                                          | protein_id=KGT41929.1 |
| gene | 4205996 | 4208179 | 656156 | 658339 | gene=IY08_22300 | protein=(p)ppGpp synthetase                                                    | protein_id=KGT41930.1 |
| gene | 4208390 | 4208902 | 658550 | 659062 | gene=IY08_22305 | protein=adenine phosphoribosyltransferase                                      | protein_id=KGT41931.1 |
| gene | 4208950 | 4211289 | 659110 | 661449 | gene=IY08_22310 | protein=recombinase RecJ                                                       | protein_id=KGT41932.1 |
| gene | 4211391 | 4212284 | 661551 | 662444 | gene=IY08_22315 | protein=cation transporter                                                     | protein_id=KGT41933.1 |
| gene | 4212441 | 4214705 | 662601 | 664865 | gene=IY08_22320 | protein=preprotein translocase subunit SecD                                    | protein_id=KGT41934.1 |
| gene | 4214975 | 4215259 | 665135 | 665419 | gene=IY08_22325 | protein=histidine kinase                                                       | protein_id=KGT41935.1 |
| gene | 4215444 | 4217003 | 665604 | 667163 | gene=IY08_22330 | protein=stage V sporulation protein B                                          | protein_id=KGT41936.1 |
| gene | 4217084 | 4217731 | 667244 | 667891 | gene=IY08_22335 | protein=membrane protein                                                       | protein_id=KGT41937.1 |
| gene | 4217835 | 4218218 | 667995 | 668378 | gene=IY08_22340 | protein=TIGR04097 family integral membrane protein                             | protein_id=KGT41938.1 |
| gene | 4218255 | 4218515 | 668415 | 668675 | gene=IY08_22345 | protein=preprotein translocase subunit YajC                                    | protein_id=KGT41939.1 |
| gene | 4218543 | 4219682 | 668703 | 669842 | gene=IY08_22350 | protein=queuine tRNA-ribosyltransferase                                        | protein_id=KGT41940.1 |
| gene | 4219695 | 4220747 | 669855 | 670907 | gene=IY08_22355 | protein=S-adenosylmethionine tRNA ribosyltransferase                           | protein_id=KGT41941.1 |
| gene | 4220767 | 4220967 | 670927 | 671127 | gene=IY08_22360 | protein=hypothetical protein                                                   | protein_id=KGT41942.1 |
| gene | 4220964 | 4221965 | 671124 | 672125 | gene=IY08_22365 | protein=ATP-dependent DNA helicase RuvB                                        | protein_id=KGT41943.1 |
| gene | 4221971 | 4222588 | 672131 | 672748 | gene=IY08_22370 | protein=ATP-dependent DNA helicase RuvA                                        | protein_id=KGT41944.1 |
| gene | 4222777 | 4223721 | 672937 | 673881 | gene=IY08_22375 | protein=ferrichrome ABC transporter substrate-binding                          | protein_id=KGT41945.1 |
| gene | 4223735 | 4224265 | 673895 | 674425 | gene=IY08_22380 | protein=BofC protein                                                           | protein_id=KGT41946.1 |
| gene | 4224697 | 4225131 | 674857 | 675291 | gene=IY08_22385 | protein=branched-chain amino acid ABC transporter<br>substrate-binding protein | protein_id=KGT41947.1 |
| gene | 4225165 | 4225806 | 675325 | 675966 | gene=IY08_22390 | protein=spore cortex protein                                                   | protein_id=KGT41948.1 |
| gene | 4225985 | 4227808 | 676145 | 677968 | gene=IY08_22395 | protein=peptigoglycan-binding protein LysM                                     | protein_id=KGT41949.1 |
| gene | 4228034 | 4229140 | 678194 | 679300 | gene=IY08_22400 | protein=quinolinate synthetase                                                 | protein_id=KGT41950.1 |
| gene | 4229171 | 4230004 | 679331 | 680164 | gene=IY08_22405 | protein=nicotinate-nucleotide pyrophosphorylase                                | protein_id=KGT41951.1 |
| gene | 4230024 | 4231553 | 680184 | 681713 | gene=IY08_22410 | protein=L-aspartate oxidase                                                    | protein_id=KGT41952.1 |
| gene | 4231706 | 4232848 | 681866 | 683008 | gene=IY08_22415 | protein=cysteine desulfurase                                                   | protein_id=KGT41953.1 |
| gene | 4232848 | 4233390 | 683008 | 683550 | gene=IY08_22420 | protein=transcriptional regulator                                              | protein_id=KGT41954.1 |
| gene | 4233470 | 4234117 | 683630 | 684277 | gene=IY08_22425 | protein=sulfurase                                                              | protein_id=KGT41955.1 |

|      |         |         |        |        |                 |                                                        |                       |
|------|---------|---------|--------|--------|-----------------|--------------------------------------------------------|-----------------------|
| gene | 4234267 | 4234737 | 684427 | 684897 | gene=IY08_22430 | protein=hypothetical protein                           | protein_id=KGT41956.1 |
| gene | 4234913 | 4235764 | 685073 | 685924 | gene=IY08_22435 | protein=prephenate dehydratase                         | protein_id=KGT41957.1 |
| gene | 4235862 | 4237775 | 686022 | 687935 | gene=IY08_22440 | protein=ABC transporter permease                       | protein_id=KGT41958.1 |
| gene | 4237825 | 4239747 | 687985 | 689907 | gene=IY08_22445 | protein=ABC transporter permease                       | protein_id=KGT41959.1 |
| gene | 4239722 | 4240498 | 689882 | 690658 | gene=IY08_22450 | protein=bacitracin ABC transporter ATP-binding protein | protein_id=KGT41960.1 |
| gene | 4240592 | 4241674 | 690752 | 691834 | gene=IY08_22455 | protein=ATPase                                         | protein_id=KGT41961.1 |
| gene | 4241664 | 4242371 | 691824 | 692531 | gene=IY08_22460 | protein=transcriptional regulator                      | protein_id=KGT41962.1 |
| gene | 4242512 | 4243798 | 692672 | 693958 | gene=IY08_22465 | protein=GTPase ObgE                                    | protein_id=KGT41963.1 |
| gene | 4243798 | 4244346 | 693958 | 694506 | gene=IY08_22470 | protein=sporulation protein                            | protein_id=KGT41964.1 |
| gene | 4244410 | 4244700 | 694570 | 694860 | gene=IY08_22475 | protein=50S ribosomal protein L27                      | protein_id=KGT41965.1 |
| gene | 4244704 | 4245048 | 694864 | 695208 | gene=IY08_22480 | protein=hypothetical protein                           | protein_id=KGT41966.1 |
| gene | 4245060 | 4245368 | 695220 | 695528 | gene=IY08_22485 | protein=50S ribosomal protein L21                      | protein_id=KGT41967.1 |
| gene | 4245538 | 4246926 | 695698 | 697086 | gene=IY08_22490 | protein=ribonuclease E                                 | protein_id=KGT41968.1 |
| gene | 4246994 | 4247854 | 697154 | 698014 | gene=IY08_22495 | protein=stage IV sporulation protein FB                | protein_id=KGT41969.1 |
| gene | 4247847 | 4248593 | 698007 | 698753 | gene=IY08_22500 | protein=peptidase M23                                  | protein_id=KGT41970.1 |
| gene | 4248727 | 4249524 | 698887 | 699684 | gene=IY08_22505 | protein=cell division inhibitor MinD                   | protein_id=KGT41971.1 |
| gene | 4249527 | 4250213 | 699687 | 700373 | gene=minC       | protein=septum formation inhibitor                     | protein_id=KGT41972.1 |
| gene | 4250249 | 4250794 | 700409 | 700954 | gene=IY08_22515 | protein=rod shape-determining protein MreD             | protein_id=KGT41973.1 |
| gene | 4250809 | 4251660 | 700969 | 701820 | gene=IY08_22520 | protein=rod shape-determining protein MreC             | protein_id=KGT41974.1 |
| gene | 4251702 | 4252721 | 701862 | 702881 | gene=IY08_22525 | protein=rod shape-determining protein MreB             | protein_id=KGT41975.1 |
| gene | 4253298 | 4254266 | 703458 | 704426 | gene=IY08_22535 | protein=signal transduction protein                    | protein_id=KGT41976.1 |
| gene | 4254282 | 4256681 | 704442 | 706841 | gene=IY08_22540 | protein=hypothetical protein                           | protein_id=KGT41977.1 |
| gene | 4257124 | 4260621 | 707284 | 710781 | gene=IY08_22545 | protein=hypothetical protein                           | protein_id=KGT41978.1 |
| gene | 4261074 | 4261760 | 711234 | 711920 | gene=IY08_22550 | protein=hypothetical protein                           | protein_id=KGT41979.1 |
| gene | 4261992 | 4262357 | 712152 | 712517 | gene=IY08_22555 | protein=transposase                                    | protein_id=KGT41980.1 |
| gene | 4262359 | 4264272 | 712519 | 714432 | gene=IY08_22560 | protein=transposase                                    | protein_id=KGT41981.1 |
| gene | 4264275 | 4265360 | 714435 | 715520 | gene=IY08_22565 | protein=transposase                                    | protein_id=KGT41982.1 |
| gene | 4265474 | 4266034 | 715634 | 716194 | gene=IY08_22570 | protein=hypothetical protein                           | protein_id=KGT41983.1 |
| gene | 4266081 | 4266656 | 716241 | 716816 | gene=IY08_22575 | protein=septum formation protein Maf                   | protein_id=KGT41984.1 |
| gene | 4266889 | 4267839 | 717049 | 717999 | gene=IY08_22580 | protein=stage II sporulation protein B                 | protein_id=KGT41985.1 |
| gene | 4268005 | 4269306 | 718165 | 719466 | gene=IY08_22585 | protein=folylpolyglutamate synthase                    | protein_id=KGT41986.1 |

|      |         |         |        |        |                 |                                                   |                       |
|------|---------|---------|--------|--------|-----------------|---------------------------------------------------|-----------------------|
| gene | 4269400 | 4272045 | 719560 | 722205 | gene=valS       | protein=valine--tRNA ligase                       | protein_id=KGT41987.1 |
| gene | 4272568 | 4273593 | 722728 | 723753 | gene=IY08_22595 | protein=spore coat protein CotS                   | protein_id=KGT41988.1 |
| gene | 4273660 | 4274640 | 723820 | 724800 | gene=IY08_22600 | protein=stage VI sporulation protein D            | protein_id=KGT41989.1 |
| gene | 4274750 | 4276039 | 724910 | 726199 | gene=IY08_22605 | protein=glutamate-1-semialdehyde aminotransferase | protein_id=KGT41990.1 |
| gene | 4276039 | 4277028 | 726199 | 727188 | gene=IY08_22610 | protein=delta-aminolevulinic acid dehydratase     | protein_id=KGT41991.1 |
| gene | 4277049 | 4277801 | 727209 | 727961 | gene=IY08_22615 | protein=uroporphyrinogen-III synthase             | protein_id=KGT41992.1 |
| gene | 4277804 | 4278733 | 727964 | 728893 | gene=IY08_22620 | protein=porphobilinogen deaminase                 | protein_id=KGT41993.1 |
| gene | 4278749 | 4279582 | 728909 | 729742 | gene=IY08_22625 | protein=cytochrome C assembly protein             | protein_id=KGT41994.1 |
| gene | 4279600 | 4280934 | 729760 | 731094 | gene=IY08_22630 | protein=glutamyl-tRNA reductase                   | protein_id=KGT41995.1 |
| gene | 4281351 | 4281803 | 731511 | 731963 | gene=IY08_22635 | protein=MarR family transcriptional regulator     | protein_id=KGT41996.1 |
| gene | 4281806 | 4282222 | 731966 | 732382 | gene=IY08_22640 | protein=Ohr subfamily peroxiredoxin               | protein_id=KGT41997.1 |
| gene | 4282256 | 4282852 | 732416 | 733012 | gene=engB       | protein=GTP-binding protein                       | protein_id=KGT41998.1 |
| gene | 4282849 | 4285179 | 733009 | 735339 | gene=IY08_22650 | protein=peptidase                                 | protein_id=KGT41999.1 |
| gene | 4285361 | 4287031 | 735521 | 737191 | gene=IY08_22655 | protein=Lon protease                              | protein_id=KGT42000.1 |
| gene | 4287138 | 4288397 | 737298 | 738557 | gene=IY08_22660 | protein=ATP-dependent protease                    | protein_id=KGT42001.1 |
| gene | 4288662 | 4289939 | 738822 | 740099 | gene=tig        | protein=trigger factor                            | protein_id=KGT42002.1 |
| gene | 4290249 | 4291247 | 740409 | 741407 | gene=IY08_22670 | protein=TPR repeat-containing protein             | protein_id=KGT42003.1 |
| gene | 4291445 | 4291693 | 741605 | 741853 | gene=IY08_22675 | protein=hypothetical protein                      | protein_id=KGT42004.1 |
| gene | 4291989 | 4292146 | 742149 | 742306 | pseudo          |                                                   |                       |
| gene | 4292212 | 4292826 | 742372 | 742986 | gene=IY08_22690 | protein=hypothetical protein                      | protein_id=KGT42005.1 |
| gene | 4292921 | 4293121 | 743081 | 743281 | gene=IY08_22695 | protein=cytoplasmic protein                       | protein_id=KGT42006.1 |
| gene | 4293545 | 4293621 | 743705 | 743781 | tRNA            |                                                   |                       |
| gene | 4293623 | 4293696 | 743783 | 743856 | tRNA            |                                                   |                       |
| gene | 4293805 | 4294308 | 743965 | 744468 | gene=IY08_22710 | protein=metallophosphatase                        | protein_id=KGT42007.1 |
| gene | 4294322 | 4294930 | 744482 | 745090 | gene=IY08_22715 | protein=nucleoside-triphosphate diphosphatase     | protein_id=KGT42008.1 |
| gene | 4294942 | 4295679 | 745102 | 745839 | gene=IY08_22720 | protein=ribonuclease PH                           | protein_id=KGT42009.1 |
| gene | 4295808 | 4296857 | 745968 | 747017 | gene=IY08_22725 | protein=sporulation protein                       | protein_id=KGT42010.1 |
| gene | 4297039 | 4297848 | 747199 | 748008 | gene=IY08_22730 | protein=glutamate racemase                        | protein_id=KGT42011.1 |
| gene | 4298124 | 4298795 | 748284 | 748955 | gene=IY08_22735 | protein=thiamine biosynthesis protein ThiJ        | protein_id=KGT42012.1 |
| gene | 4298901 | 4299125 | 749061 | 749285 | gene=IY08_22740 | protein=LuxR family transcriptional regulator     | protein_id=KGT42013.1 |
| gene | 4299291 | 4300586 | 749451 | 750746 | gene=IY08_22745 | protein=xanthine permease                         | protein_id=KGT42014.1 |

|      |         |         |        |        |                 |                                                       |                       |
|------|---------|---------|--------|--------|-----------------|-------------------------------------------------------|-----------------------|
| gene | 4300684 | 4301925 | 750844 | 752085 | gene=IY08_22755 | protein=deaminase                                     | protein_id=KGT42015.1 |
| gene | 4302109 | 4302294 | 752269 | 752454 | gene=IY08_22760 | protein=phage shock protein                           | protein_id=KGT42016.1 |
| gene | 4302356 | 4302928 | 752516 | 753088 | gene=IY08_22765 | protein=DNA-binding protein                           | protein_id=KGT42017.1 |
| gene | 4303029 | 4303994 | 753189 | 754154 | gene=IY08_22770 | protein=membrane protein                              | protein_id=KGT42018.1 |
| gene | 4304138 | 4304803 | 754298 | 754963 | gene=IY08_22775 | protein=porin                                         | protein_id=KGT42019.1 |
| gene | 4304864 | 4305295 | 755024 | 755455 | gene=IY08_22780 | protein=Rrf2 family transcriptional regulator         | protein_id=KGT42020.1 |
| gene | 4305414 | 4306640 | 755574 | 756800 | gene=IY08_22785 | protein=sodium export permease                        | protein_id=KGT42021.1 |
| gene | 4306643 | 4307527 | 756803 | 757687 | gene=IY08_22790 | protein=ABC transporter ATP-binding protein           | protein_id=KGT42022.1 |
| gene | 4307870 | 4308697 | 758030 | 758857 | gene=IY08_22795 | protein=5'-nucleotidase                               | protein_id=KGT42023.1 |
| gene | 4308724 | 4309512 | 758884 | 759672 | gene=motB       | protein=flagellar motor protein MotB                  | protein_id=KGT42024.1 |
| gene | 4309502 | 4310296 | 759662 | 760456 | gene=IY08_22805 | protein=flagellar motor protein MotA                  | protein_id=KGT42025.1 |
| gene | 4310563 | 4311342 | 760723 | 761502 | gene=IY08_22810 | protein=D-alanyl-D-alanine carboxypeptidase           | protein_id=KGT42026.1 |
| gene | 4311379 | 4311825 | 761539 | 761985 | gene=IY08_22815 | protein=hypothetical protein                          | protein_id=KGT42027.1 |
| gene | 4311918 | 4312679 | 762078 | 762839 | gene=sdhB       | protein=succinate dehydrogenase                       | protein_id=KGT42028.1 |
| gene | 4312672 | 4314465 | 762832 | 764625 | gene=sdhA       | protein=succinate dehydrogenase                       | protein_id=KGT42029.1 |
| gene | 4314479 | 4315105 | 764639 | 765265 | gene=IY08_22830 | protein=succinate dehydrogenase                       | protein_id=KGT42030.1 |
| gene | 4315406 | 4315855 | 765566 | 766015 | gene=IY08_22835 | protein=hypothetical protein                          | protein_id=KGT42031.1 |
| gene | 4315971 | 4317755 | 766131 | 767915 | gene=IY08_22840 | protein=excinuclease ABC subunit C                    | protein_id=KGT42032.1 |
| gene | 4317904 | 4318218 | 768064 | 768378 | gene=IY08_22845 | protein=thioredoxin                                   | protein_id=KGT42033.1 |
| gene | 4318430 | 4319407 | 768590 | 769567 | gene=IY08_22850 | protein=electron transfer flavoprotein subunit alpha  | protein_id=KGT42034.1 |
| gene | 4319444 | 4320217 | 769604 | 770377 | gene=IY08_22855 | protein=electron transfer flavoprotein subunit beta   | protein_id=KGT42035.1 |
| gene | 4320296 | 4321072 | 770456 | 771232 | gene=IY08_22860 | protein=enoyl-CoA hydratase                           | protein_id=KGT42036.1 |
| gene | 4321084 | 4321716 | 771244 | 771876 | gene=IY08_22865 | protein=TetR family transcriptional regulator         | protein_id=KGT42037.1 |
| gene | 4321778 | 4323463 | 771938 | 773623 | gene=IY08_22870 | protein=long-chain fatty acid--CoA ligase             | protein_id=KGT42038.1 |
| gene | 4323652 | 4324815 | 773812 | 774975 | gene=IY08_22875 | protein=hypothetical protein                          | protein_id=KGT42039.1 |
| gene | 4325267 | 4326241 | 775427 | 776401 | gene=IY08_22880 | protein=ferrichrome ABC transporter substrate-binding | protein_id=KGT42040.1 |
| gene | 4326249 | 4328285 | 776409 | 778445 | gene=IY08_22885 | protein=iron-hydroxamate transporter permease         | protein_id=KGT42041.1 |
| gene | 4328484 | 4329383 | 778644 | 779543 | gene=IY08_22890 | protein=hypothetical protein                          | protein_id=KGT42042.1 |
| gene | 4329538 | 4330041 | 779698 | 780201 | gene=IY08_22895 | protein=hypothetical protein                          | protein_id=KGT42043.1 |
| gene | 4330203 | 4330535 | 780363 | 780695 | gene=IY08_22900 | protein=Spore coat protein C                          | protein_id=KGT42044.1 |
| gene | 4330597 | 4331292 | 780757 | 781452 | gene=IY08_22905 | protein=hypothetical protein                          | protein_id=KGT42045.1 |

|      |         |         |        |        |                 |                                                                 |                       |
|------|---------|---------|--------|--------|-----------------|-----------------------------------------------------------------|-----------------------|
| gene | 4331317 | 4332189 | 781477 | 782349 | gene=IY08_22910 | protein=hypothetical protein                                    | protein_id=KGT42046.1 |
| gene | 4332224 | 4332928 | 782384 | 783088 | gene=IY08_22915 | protein=bacitracin ABC transporter permease                     | protein_id=KGT42047.1 |
| gene | 4332963 | 4333124 | 783123 | 783284 | gene=IY08_22920 | protein=hypothetical protein                                    | protein_id=KGT42048.1 |
| gene | 4333117 | 4334040 | 783277 | 784200 | gene=IY08_22925 | protein=bacitracin ABC transporter ATP-binding protein          | protein_id=KGT42049.1 |
| gene | 4334166 | 4335101 | 784326 | 785261 | gene=IY08_22930 | protein=histidine kinase                                        | protein_id=KGT42050.1 |
| gene | 4335103 | 4335795 | 785263 | 785955 | gene=IY08_22935 | protein=PhoP family transcriptional regulator                   | protein_id=KGT42051.1 |
| gene | 4335964 | 4336137 | 786124 | 786297 | gene=IY08_22940 | protein=hypothetical protein                                    | protein_id=KGT42052.1 |
| gene | 4336138 | 4336332 | 786298 | 786492 | gene=IY08_22945 | protein=hypothetical protein                                    | protein_id=KGT42053.1 |
| gene | 4336371 | 4337570 | 786531 | 787730 | gene=IY08_22950 | protein=50S rRNA methyltransferase                              | protein_id=KGT42054.1 |
| gene | 4337866 | 4338189 | 788026 | 788349 | gene=IY08_22955 | protein=heme-degrading monooxygenase IsdG                       | protein_id=KGT42055.1 |
| gene | 4338262 | 4339026 | 788422 | 789186 | gene=IY08_22960 | protein=sortase                                                 | protein_id=KGT42056.1 |
| gene | 4339059 | 4339829 | 789219 | 789989 | gene=IY08_22965 | protein=iron ABC transporter ATP-binding protein                | protein_id=KGT42057.1 |
| gene | 4339819 | 4340802 | 789979 | 790962 | gene=IY08_22970 | protein=ABC transporter permease                                | protein_id=KGT42058.1 |
| gene | 4340830 | 4341711 | 790990 | 791871 | gene=IY08_22975 | protein=heme ABC transporter substrate-binding protein          | protein_id=KGT42059.1 |
| gene | 4344296 | 4344754 | 794456 | 794914 | gene=IY08_22990 | protein=cell surface protein                                    | protein_id=KGT42060.1 |
| gene | 4344778 | 4345491 | 794938 | 795651 | gene=IY08_22995 | protein=cell surface protein                                    | protein_id=KGT42061.1 |
| gene | 4345982 | 4347307 | 796142 | 797467 | gene=IY08_23000 | protein=branched-chain amino acid transporter                   | protein_id=KGT42062.1 |
| gene | 4347788 | 4348477 | 797948 | 798637 | gene=IY08_23005 | protein=pseudouridine synthase                                  | protein_id=KGT42063.1 |
| gene | 4348550 | 4348642 | 798710 | 798802 | gene=IY08_23010 | protein=hypothetical protein                                    | protein_id=KGT42064.1 |
| gene | 4348673 | 4351033 | 798833 | 801193 | gene=IY08_23015 | protein=recombination and DNA strand exchange inhibitor protein | protein_id=KGT42065.1 |
| gene | 4351053 | 4352771 | 801213 | 802931 | gene=IY08_23020 | protein=hypothetical protein                                    | protein_id=KGT42066.1 |
| gene | 4352827 | 4353366 | 802987 | 803526 | gene=IY08_23025 | protein=membrane protein                                        | protein_id=KGT42067.1 |
| gene | 4353368 | 4353637 | 803528 | 803797 | gene=IY08_23030 | protein=cell division protein ZapA                              | protein_id=KGT42068.1 |
| gene | 4353762 | 4354697 | 803922 | 804857 | gene=IY08_23035 | protein=ribonuclease HIII                                       | protein_id=KGT42069.1 |
| gene | 4354814 | 4355083 | 804974 | 805243 | gene=IY08_23040 | protein=hypothetical protein                                    | protein_id=KGT42070.1 |
| gene | 4355080 | 4355331 | 805240 | 805491 | gene=IY08_23045 | protein=hypothetical protein                                    | protein_id=KGT42071.1 |
| gene | 4355373 | 4355507 | 805533 | 805667 | gene=IY08_23050 | protein=hypothetical protein                                    | protein_id=KGT42072.1 |
| gene | 4355608 | 4356999 | 805768 | 807159 | gene=IY08_23055 | protein=asparaginyl-tRNA synthetase                             | protein_id=KGT42073.1 |
| gene | 4357458 | 4359878 | 807618 | 810038 | gene=IY08_23060 | protein=phenylalanyl-tRNA synthase subunit beta                 | protein_id=KGT42074.1 |
| gene | 4359897 | 4360931 | 810057 | 811091 | gene=pheS       | protein=phenylalanine--tRNA ligase                              | protein_id=KGT42075.1 |

|      |         |         |        |        |                 |                                                        |                       |
|------|---------|---------|--------|--------|-----------------|--------------------------------------------------------|-----------------------|
| gene | 4361253 | 4362050 | 811413 | 812210 | gene=IY08_23070 | protein=23S rRNA methyltransferase                     | protein_id=KGT42076.1 |
| gene | 4362133 | 4362342 | 812293 | 812502 | gene=IY08_23075 | protein=small acid-soluble spore protein SspI          | protein_id=KGT42077.1 |
| gene | 4362519 | 4363076 | 812679 | 813236 | gene=IY08_23080 | protein=phosphohydrolase                               | protein_id=KGT42078.1 |
| gene | 4363216 | 4363929 | 813376 | 814089 | gene=IY08_23085 | protein=CAAX protease                                  | protein_id=KGT42079.1 |
| gene | 4364072 | 4364431 | 814232 | 814591 | gene=IY08_23090 | protein=DNA-binding protein                            | protein_id=KGT42080.1 |
| gene | 4364481 | 4364837 | 814641 | 814997 | gene=IY08_23095 | protein=ammonia permease                               | protein_id=KGT42081.1 |
| gene | 4364860 | 4366659 | 815020 | 816819 | gene=IY08_23100 | protein=MFS transporter                                | protein_id=KGT42082.1 |
| gene | 4366672 | 4367325 | 816832 | 817485 | gene=IY08_23105 | protein=multidrug efflux protein                       | protein_id=KGT42083.1 |
| gene | 4367622 | 4368239 | 817782 | 818399 | gene=IY08_23110 | protein=TetR family transcriptional regulator          | protein_id=KGT42084.1 |
| gene | 4368280 | 4369365 | 818440 | 819525 | gene=IY08_23115 | protein=peptidase M28                                  | protein_id=KGT42085.1 |
| gene | 4369436 | 4369927 | 819596 | 820087 | gene=IY08_23120 | protein=dUTPase                                        | protein_id=KGT42086.1 |
| gene | 4370370 | 4370726 | 820530 | 820886 | gene=IY08_23125 | protein=50S ribosomal protein L20                      | protein_id=KGT42087.1 |
| gene | 4370764 | 4370964 | 820924 | 821124 | gene=rpml       | protein=50S ribosomal protein L35                      | protein_id=KGT42088.1 |
| gene | 4370986 | 4371486 | 821146 | 821646 | gene=IY08_23135 | protein=translation initiation factor IF-3             | protein_id=KGT42089.1 |
| gene | 4371884 | 4373821 | 822044 | 823981 | gene=IY08_23140 | protein=threonyl-tRNA synthase                         | protein_id=KGT42090.1 |
| gene | 4374129 | 4375010 | 824289 | 825170 | gene=IY08_23145 | protein=hypothetical protein                           | protein_id=KGT42091.1 |
| gene | 4375245 | 4375442 | 825405 | 825602 | gene=IY08_23150 | protein=hypothetical protein                           | protein_id=KGT42092.1 |
| gene | 4375474 | 4376412 | 825634 | 826572 | gene=IY08_23155 | protein=primosomal protein DnaI                        | protein_id=KGT42093.1 |
| gene | 4376446 | 4377855 | 826606 | 828015 | gene=IY08_23160 | protein=Replication initiation and membrane attachment | protein_id=KGT42094.1 |
| gene | 4378008 | 4378469 | 828168 | 828629 | gene=nrdR       | protein=transcriptional regulator NrdR                 | protein_id=KGT42095.1 |
| gene | 4378753 | 4379145 | 828913 | 829305 | gene=IY08_23170 | protein=S-adenosylmethionine decarboxylase             | protein_id=KGT42096.1 |
| gene | 4379522 | 4380550 | 829682 | 830710 | gene=IY08_23175 | protein=glyceraldehyde-3-phosphate dehydrogenase       | protein_id=KGT42097.1 |
| gene | 4380660 | 4381262 | 830820 | 831422 | gene=IY08_23180 | protein=dephospho-CoA kinase                           | protein_id=KGT42098.1 |
| gene | 4381314 | 4381946 | 831474 | 832106 | gene=IY08_23185 | protein=membrane protein                               | protein_id=KGT42099.1 |
| gene | 4382019 | 4382849 | 832179 | 833009 | gene=IY08_23190 | protein=5-hydroxymethyluracil DNA glycosylase          | protein_id=KGT42100.1 |
| gene | 4382862 | 4385495 | 833022 | 835655 | gene=IY08_23195 | protein=DNA polymerase I                               | protein_id=KGT42101.1 |
| gene | 4385781 | 4387544 | 835941 | 837704 | gene=IY08_23200 | protein=alkaline phosphatase                           | protein_id=KGT42102.1 |
| gene | 4387537 | 4388256 | 837697 | 838416 | gene=IY08_23205 | protein=chemotaxis protein CheY                        | protein_id=KGT42103.1 |
| gene | 4388928 | 4389401 | 839088 | 839561 | gene=IY08_23220 | protein=enoyl-CoA hydratase                            | protein_id=KGT42104.1 |
| gene | 4389617 | 4390555 | 839777 | 840715 | gene=IY08_23225 | protein=malate dehydrogenase                           | protein_id=KGT42105.1 |
| gene | 4390575 | 4391867 | 840735 | 842027 | gene=IY08_23230 | protein=isocitrate dehydrogenase                       | protein_id=KGT42106.1 |

|      |         |         |        |        |                 |                                                       |                       |
|------|---------|---------|--------|--------|-----------------|-------------------------------------------------------|-----------------------|
| gene | 4392028 | 4393143 | 842188 | 843303 | gene=IY08_23235 | protein=citrate synthase                              | protein_id=KGT42107.1 |
| gene | 4393256 | 4393474 | 843416 | 843634 | gene=IY08_23240 | protein=hypothetical protein                          | protein_id=KGT42108.1 |
| gene | 4393564 | 4394025 | 843724 | 844185 | gene=IY08_23245 | protein=membrane protein                              | protein_id=KGT42109.1 |
| gene | 4394590 | 4395708 | 844750 | 845868 | gene=IY08_23250 | protein=membrane protein                              | protein_id=KGT42110.1 |
| gene | 4396337 | 4396726 | 846497 | 846886 | gene=IY08_23255 | protein=exclusion suppressor FxsA                     | protein_id=KGT42111.1 |
| gene | 4396922 | 4398679 | 847082 | 848839 | gene=IY08_23260 | protein=pyruvate kinase                               | protein_id=KGT42112.1 |
| gene | 4398733 | 4399692 | 848893 | 849852 | gene=IY08_23265 | protein=6-phosphofructokinase                         | protein_id=KGT42113.1 |
| gene | 4399821 | 4400795 | 849981 | 850955 | gene=IY08_23270 | protein=acetyl-CoA carboxylase subunit alpha          | protein_id=KGT42114.1 |
| gene | 4400783 | 4401652 | 850943 | 851812 | gene=IY08_23275 | protein=acetyl-CoA carboxyl transferase               | protein_id=KGT42115.1 |
| gene | 4401838 | 4402482 | 851998 | 852642 | gene=IY08_23280 | protein=GntR family transcriptional regulator         | protein_id=KGT42116.1 |
| gene | 4402497 | 4403735 | 852657 | 853895 | gene=IY08_23285 | protein=malate dehydrogenase                          | protein_id=KGT42117.1 |
| gene | 4403839 | 4407165 | 853999 | 857325 | gene=dnaE       | protein=DNA polymerase III DnaE                       | protein_id=KGT42118.1 |
| gene | 4407283 | 4407621 | 857443 | 857781 | gene=IY08_23295 | protein=sporulation protein                           | protein_id=KGT42119.1 |
| gene | 4407618 | 4408121 | 857778 | 858281 | gene=IY08_23300 | protein=molybdenum cofactor biosynthesis protein MoaA | protein_id=KGT42120.1 |
| gene | 4408173 | 4409105 | 858333 | 859265 | gene=IY08_23305 | protein=oligoribonuclease                             | protein_id=KGT42121.1 |
| gene | 4409265 | 4409570 | 859425 | 859730 | gene=IY08_23310 | protein=membrane protein                              | protein_id=KGT42122.1 |
| gene | 4409578 | 4409841 | 859738 | 860001 | gene=IY08_23315 | protein=hypothetical protein                          | protein_id=KGT42123.1 |
| gene | 4410057 | 4411370 | 860217 | 861530 | gene=IY08_23320 | protein=hypothetical protein                          | protein_id=KGT42124.1 |
| gene | 4411615 | 4411776 | 861775 | 861936 | gene=IY08_23325 | protein=hypothetical protein                          | protein_id=KGT42125.1 |
| gene | 4411818 | 4412501 | 861978 | 862661 | gene=IY08_23330 | protein=metal-dependent hydrolase                     | protein_id=KGT42126.1 |
| gene | 4412651 | 4413748 | 862811 | 863908 | gene=IY08_23335 | protein=metallopeptidase                              | protein_id=KGT42127.1 |
| gene | 4413789 | 4414163 | 863949 | 864323 | gene=IY08_23340 | protein=lipoprotein                                   | protein_id=KGT42128.1 |
| gene | 4414238 | 4414444 | 864398 | 864604 | gene=IY08_23345 | protein=hypothetical protein                          | protein_id=KGT42129.1 |
| gene | 4414983 | 4415438 | 865143 | 865598 | gene=IY08_23350 | protein=acetyltransferase                             | protein_id=KGT42130.1 |
| gene | 4415512 | 4415856 | 865672 | 866016 | gene=IY08_23355 | protein=hypothetical protein                          | protein_id=KGT42131.1 |
| gene | 4415859 | 4416647 | 866019 | 866807 | gene=IY08_23360 | protein=acetyltransferase                             | protein_id=KGT42132.1 |
| gene | 4416644 | 4416976 | 866804 | 867136 | gene=IY08_23365 | protein=hypothetical protein                          | protein_id=KGT42133.1 |
| gene | 4417021 | 4417443 | 867181 | 867603 | gene=IY08_23370 | protein=hypothetical protein                          | protein_id=KGT42134.1 |
| gene | 4417583 | 4418716 | 867743 | 868876 | gene=IY08_23375 | protein=alanine dehydrogenase                         | protein_id=KGT42135.1 |
| gene | 4418931 | 4419722 | 869091 | 869882 | gene=fabG       | protein=3-ketoacyl-ACP reductase                      | protein_id=KGT42136.1 |
| gene | 4419870 | 4420328 | 870030 | 870488 | gene=IY08_23385 | protein=universal stress protein UspA                 | protein_id=KGT42137.1 |



|      |         |         |        |        |                 |                                                    |                       |
|------|---------|---------|--------|--------|-----------------|----------------------------------------------------|-----------------------|
| gene | 4420370 | 4421065 | 870530 | 871225 | gene=IY08_23390 | protein=membrane protein                           | protein_id=KGT42138.1 |
| gene | 4421161 | 4421340 | 871321 | 871500 | gene=IY08_23395 | protein=ProA domain protein                        | protein_id=KGT42139.1 |
| gene | 4421413 | 4422801 | 871573 | 872961 | gene=IY08_23400 | protein=argininosuccinate lyase                    | protein_id=KGT42140.1 |
| gene | 4422798 | 4424003 | 872958 | 874163 | gene=IY08_23405 | protein=argininosuccinate synthase                 | protein_id=KGT42141.1 |
| gene | 4424170 | 4424487 | 874330 | 874647 | gene=IY08_23410 | protein=radical SAM protein                        | protein_id=KGT42142.1 |
| gene | 4424502 | 4424711 | 874662 | 874871 | gene=IY08_23415 | protein=hypothetical protein                       | protein_id=KGT42143.1 |
| gene | 4425565 | 4426227 | 875725 | 876387 | gene=IY08_23425 | protein=membrane protein                           | protein_id=KGT42144.1 |
| gene | 4426259 | 4427092 | 876419 | 877252 | gene=IY08_23430 | protein=ABC transporter substrate-binding protein  | protein_id=KGT42145.1 |
| gene | 4427230 | 4427865 | 877390 | 878025 | gene=IY08_23435 | protein=amino acid permease                        | protein_id=KGT42146.1 |
| gene | 4427935 | 4428369 | 878095 | 878529 | gene=IY08_23440 | protein=DNA mismatch repair protein MutT           | protein_id=KGT42147.1 |
| gene | 4428393 | 4429586 | 878553 | 879746 | gene=IY08_23445 | protein=acetate kinase                             | protein_id=KGT42148.1 |
| gene | 4429886 | 4430872 | 880046 | 881032 | gene=IY08_23450 | protein=DNA methylase                              | protein_id=KGT42149.1 |
| gene | 4431072 | 4431572 | 881232 | 881732 | gene=IY08_23455 | protein=peroxidase                                 | protein_id=KGT42150.1 |
| gene | 4431707 | 4432102 | 881867 | 882262 | gene=IY08_23460 | protein=spore protein                              | protein_id=KGT42151.1 |
| gene | 4432115 | 4432753 | 882275 | 882913 | gene=IY08_23465 | protein=Yvgn And cofactor Nadph                    | protein_id=KGT42152.1 |
| gene | 4432959 | 4433762 | 883119 | 883922 | gene=ppnK       | protein=inorganic polyphosphate kinase             | protein_id=KGT42153.1 |
| gene | 4433915 | 4435483 | 884075 | 885643 | gene=IY08_23475 | protein=amidohydrolase                             | protein_id=KGT42154.1 |
| gene | 4435555 | 4435986 | 885715 | 886146 | gene=IY08_23480 | protein=3-demethylubiquinone-9 3-methyltransferase | protein_id=KGT42155.1 |
| gene | 4436089 | 4437675 | 886249 | 887835 | gene=IY08_23485 | protein=acyl--CoA ligase                           | protein_id=KGT42156.1 |
| gene | 4437867 | 4438064 | 888027 | 888224 | gene=IY08_23490 | protein=spore protein                              | protein_id=KGT42157.1 |
| gene | 4438144 | 4439358 | 888304 | 889518 | gene=IY08_23495 | protein=thiamine biosynthesis protein ThiI         | protein_id=KGT42158.1 |
| gene | 4439366 | 4440508 | 889526 | 890668 | gene=IY08_23500 | protein=cysteine desulfurase                       | protein_id=KGT42159.1 |
| gene | 4440677 | 4442389 | 890837 | 892549 | gene=IY08_23505 | protein=septation ring formation regulator EzrA    | protein_id=KGT42160.1 |
| gene | 4442600 | 4443439 | 892760 | 893599 | gene=IY08_23510 | protein=LysR family transcriptional regulator      | protein_id=KGT42161.1 |
| gene | 4443564 | 4444508 | 893724 | 894668 | gene=IY08_23515 | protein=transporter                                | protein_id=KGT42162.1 |
| gene | 4444520 | 4445158 | 894680 | 895318 | gene=IY08_23520 | protein=transcriptional regulator                  | protein_id=KGT42163.1 |
| gene | 4445306 | 4445785 | 895466 | 895945 | gene=IY08_23525 | protein=GAF domain-containing protein              | protein_id=KGT42164.1 |
| gene | 4445847 | 4447022 | 896007 | 897182 | gene=IY08_23530 | protein=methionine gamma-lyase                     | protein_id=KGT42165.1 |
| gene | 4447422 | 4448024 | 897582 | 898184 | gene=IY08_23535 | protein=30S ribosomal protein S4                   | protein_id=KGT42166.1 |
| gene | 4448322 | 4448741 | 898482 | 898901 | gene=IY08_23540 | protein=hypothetical protein                       | protein_id=KGT42167.1 |
| gene | 4448980 | 4449225 | 899140 | 899385 | gene=IY08_23550 | protein=hypothetical protein                       | protein_id=KGT42168.1 |

|      |         |         |        |        |                 |                                                   |                       |
|------|---------|---------|--------|--------|-----------------|---------------------------------------------------|-----------------------|
| gene | 4449365 | 4449580 | 899525 | 899740 | gene=IY08_23555 | protein=hypothetical protein                      | protein_id=KGT42169.1 |
| gene | 4449760 | 4451262 | 899920 | 901422 | gene=IY08_23560 | protein=cytoplasmic protein                       | protein_id=KGT42170.1 |
| gene | 4451268 | 4451690 | 901428 | 901850 | gene=IY08_23565 | protein=hypothetical protein                      | protein_id=KGT42171.1 |
| gene | 4451781 | 4452947 | 901941 | 903107 | gene=IY08_23570 | protein=hypothetical protein                      | protein_id=KGT42172.1 |
| gene | 4453008 | 4453688 | 903168 | 903848 | gene=IY08_23575 | protein=hypothetical protein                      | protein_id=KGT42173.1 |
| gene | 4453853 | 4454316 | 904013 | 904476 | pseudo          |                                                   |                       |
| gene | 4454382 | 4454510 | 904542 | 904670 | gene=IY08_23585 | protein=transporter                               | protein_id=KGT42174.1 |
| gene | 4454638 | 4455894 | 904798 | 906054 | gene=IY08_23590 | protein=tyrosine--tRNA ligase                     | protein_id=KGT42175.1 |
| gene | 4456271 | 4456516 | 906431 | 906676 | gene=IY08_23595 | protein=hypothetical protein                      | protein_id=KGT42176.1 |
| gene | 4456497 | 4457042 | 906657 | 907202 | gene=IY08_23600 | protein=RNA polymerase sigma70 factor             | protein_id=KGT42177.1 |
| gene | 4457023 | 4457478 | 907183 | 907638 | gene=IY08_23605 | protein=hypothetical protein                      | protein_id=KGT42178.1 |
| gene | 4457545 | 4458102 | 907705 | 908262 | gene=IY08_23610 | protein=acetyltransferase                         | protein_id=KGT42179.1 |
| gene | 4458190 | 4459908 | 908350 | 910068 | gene=IY08_23615 | protein=acetyl-CoA synthetase                     | protein_id=KGT42180.1 |
| gene | 4460085 | 4460717 | 910245 | 910877 | gene=IY08_23620 | protein=acetoin dehydrogenase                     | protein_id=KGT42181.1 |
| gene | 4460735 | 4461379 | 910895 | 911539 | gene=IY08_23625 | protein=acetoin utilization protein AcuB          | protein_id=KGT42182.1 |
| gene | 4461349 | 4462542 | 911509 | 912702 | gene=IY08_23630 | protein=histone deacetylase                       | protein_id=KGT42183.1 |
| gene | 4462779 | 4463645 | 912939 | 913805 | gene=IY08_23635 | protein=proline iminopeptidase                    | protein_id=KGT42184.1 |
| gene | 4463684 | 4463971 | 913844 | 914131 | gene=IY08_23640 | protein=hypothetical protein                      | protein_id=KGT42185.1 |
| gene | 4464097 | 4464786 | 914257 | 914946 | gene=IY08_23645 | protein=transcriptional regulator                 | protein_id=KGT42186.1 |
| gene | 4464788 | 4466242 | 914948 | 916402 | gene=IY08_23650 | protein=histidine kinase                          | protein_id=KGT42187.1 |
| gene | 4466392 | 4467072 | 916552 | 917232 | gene=IY08_23655 | protein=ankyrin                                   | protein_id=KGT42188.1 |
| gene | 4467152 | 4468078 | 917312 | 918238 | gene=IY08_23660 | protein=virulence factor MviM                     | protein_id=KGT42189.1 |
| gene | 4468207 | 4468608 | 918367 | 918768 | gene=IY08_23665 | protein=mechanosensitive ion channel protein MscL | protein_id=KGT42190.1 |
| gene | 4468657 | 4468929 | 918817 | 919089 | gene=IY08_23670 | protein=transcriptional regulator                 | protein_id=KGT42191.1 |
| gene | 4469372 | 4470370 | 919532 | 920530 | gene=IY08_23680 | protein=catabolite control protein A              | protein_id=KGT42192.1 |
| gene | 4470418 | 4470594 | 920578 | 920754 | gene=IY08_23685 | protein=hypothetical protein                      | protein_id=KGT42193.1 |
| gene | 4470863 | 4471936 | 921023 | 922096 | gene=IY08_23690 | protein=chorismate mutase                         | protein_id=KGT42194.1 |
| gene | 4472103 | 4473125 | 922263 | 923285 | gene=IY08_23695 | protein=sex pheromone                             | protein_id=KGT42195.1 |
| gene | 4473243 | 4473569 | 923403 | 923729 | gene=IY08_23700 | protein=hypothetical protein                      | protein_id=KGT42196.1 |
| gene | 4473569 | 4474126 | 923729 | 924286 | gene=IY08_23705 | protein=general stress protein                    | protein_id=KGT42197.1 |
| gene | 4474269 | 4475384 | 924429 | 925544 | gene=IY08_23710 | protein=aminopeptidase                            | protein_id=KGT42198.1 |

|      |         |         |        |        |                 |                                               |                       |
|------|---------|---------|--------|--------|-----------------|-----------------------------------------------|-----------------------|
| gene | 4475419 | 4475823 | 925579 | 925983 | gene=IY08_23715 | protein=hypothetical protein                  | protein_id=KGT42199.1 |
| gene | 4475900 | 4476391 | 926060 | 926551 | gene=IY08_23720 | protein=GNAT family acetyltransferase         | protein_id=KGT42200.1 |
| gene | 4476388 | 4476936 | 926548 | 927096 | gene=IY08_23725 | protein=alanine acetyltransferase             | protein_id=KGT42201.1 |
| gene | 4477119 | 4478429 | 927279 | 928589 | gene=IY08_23730 | protein=UDP-N-acetylmuramate--alanine ligase  | protein_id=KGT42202.1 |
| gene | 4478681 | 4479799 | 928841 | 929959 | gene=IY08_23735 | protein=nicotinate phosphoribosyltransferase  | protein_id=KGT42203.1 |
| gene | 4479861 | 4483738 | 930021 | 933898 | pseudo          |                                               |                       |
| gene | 4483894 | 4484847 | 934054 | 935007 | gene=IY08_23745 | protein=N-acetylmuramoyl-L-alanine amidase    | protein_id=KGT42204.1 |
| gene | 4484888 | 4485232 | 935048 | 935392 | gene=IY08_23750 | protein=thiamine transporter                  | protein_id=KGT42205.1 |
| gene | 4485458 | 4486072 | 935618 | 936232 | gene=IY08_23755 | protein=tRNA-binding protein                  | protein_id=KGT42206.1 |
| gene | 4486069 | 4486881 | 936229 | 937041 | gene=IY08_23760 | protein=hypothetical protein                  | protein_id=KGT42207.1 |
| gene | 4486961 | 4487275 | 937121 | 937435 | gene=IY08_23765 | protein=thioredoxin                           | protein_id=KGT42208.1 |
| gene | 4487358 | 4487867 | 937518 | 938027 | gene=yjjX       | protein=NTPase                                | protein_id=KGT42209.1 |
| gene | 4488149 | 4489222 | 938309 | 939382 | gene=IY08_23775 | protein=peptidase M28                         | protein_id=KGT42210.1 |
| gene | 4489371 | 4489682 | 939531 | 939842 | gene=IY08_23780 | protein=peptidase M4                          | protein_id=KGT42211.1 |
| gene | 4489981 | 4490835 | 940141 | 940995 | gene=IY08_23785 | protein=hypothetical protein                  | protein_id=KGT42212.1 |
| gene | 4490904 | 4491557 | 941064 | 941717 | gene=IY08_23790 | protein=tRNA (guanine-N7)-methyltransferase   | protein_id=KGT42213.1 |
| gene | 4491787 | 4492065 | 941947 | 942225 | gene=IY08_23795 | protein=hypothetical protein                  | protein_id=KGT42214.1 |
| gene | 4492069 | 4492866 | 942229 | 943026 | gene=IY08_23800 | protein=phosphotransferase                    | protein_id=KGT42215.1 |
| gene | 4493094 | 4495235 | 943254 | 945395 | gene=IY08_23805 | protein=pullulanase                           | protein_id=KGT42216.1 |
| gene | 4495350 | 4495440 | 945510 | 945600 | pseudo          |                                               |                       |
| gene | 4495447 | 4495992 | 945607 | 946152 | gene=IY08_23815 | protein=2'-5' RNA ligase                      | protein_id=KGT42217.1 |
| gene | 4496096 | 4497502 | 946256 | 947662 | gene=IY08_23820 | protein=dipeptidase PepV                      | protein_id=KGT42218.1 |
| gene | 4497860 | 4498081 | 948020 | 948241 | gene=IY08_23825 | protein=hypothetical protein                  | protein_id=KGT42219.1 |
| gene | 4498161 | 4498889 | 948321 | 949049 | gene=IY08_23830 | protein=pseudouridine synthase                | protein_id=KGT42220.1 |
| gene | 4498931 | 4500583 | 949091 | 950743 | gene=IY08_23835 | protein=cell division protein                 | protein_id=KGT42221.1 |
| gene | 4500878 | 4502149 | 951038 | 952309 | gene=IY08_23840 | protein=hypothetical protein                  | protein_id=KGT42222.1 |
| gene | 4502434 | 4503873 | 952594 | 954033 | gene=IY08_23845 | protein=DSBA oxidoreductase                   | protein_id=KGT42223.1 |
| gene | 4503903 | 4504226 | 954063 | 954386 | gene=IY08_23850 | protein=ArsR family transcriptional regulator | protein_id=KGT42224.1 |
| gene | 4504227 | 4504658 | 954387 | 954818 | gene=IY08_23855 | protein=hypothetical protein                  | protein_id=KGT42225.1 |
| gene | 4505082 | 4505309 | 955242 | 955469 | gene=IY08_23860 | protein=hypothetical protein                  | protein_id=KGT42226.1 |
| gene | 4505344 | 4505526 | 955504 | 955686 | gene=IY08_23865 | protein=Sporulation protein cse60             | protein_id=KGT42227.1 |

|      |         |         |        |        |                 |                                                                   |                       |
|------|---------|---------|--------|--------|-----------------|-------------------------------------------------------------------|-----------------------|
| gene | 4505528 | 4505764 | 955688 | 955924 | gene=IY08_23870 | protein=hypothetical protein                                      | protein_id=KGT42228.1 |
| gene | 4506109 | 4506603 | 956269 | 956763 | gene=IY08_23875 | protein=transcription factor YdeB                                 | protein_id=KGT42229.1 |
| gene | 4506675 | 4507460 | 956835 | 957620 | gene=IY08_23880 | protein=sugar dehydrogenase                                       | protein_id=KGT42230.1 |
| gene | 4507474 | 4508331 | 957634 | 958491 | gene=IY08_23885 | protein=glucose transporter GlcU                                  | protein_id=KGT42231.1 |
| gene | 4508368 | 4508787 | 958528 | 958947 | gene=IY08_23890 | protein=hypothetical protein                                      | protein_id=KGT42232.1 |
| gene | 4508881 | 4509114 | 959041 | 959274 | gene=IY08_23895 | protein=molybdenum cofactor biosynthesis protein MoaD             | protein_id=KGT42233.1 |
| gene | 4509117 | 4509581 | 959277 | 959741 | gene=IY08_23900 | protein=molybdopterin (MPT) converting factor, subunit 2          | protein_id=KGT42234.1 |
| gene | 4509578 | 4510093 | 959738 | 960253 | gene=IY08_23905 | protein=molybdopterin-guanine dinucleotide biosynthesis protein B | protein_id=KGT42235.1 |
| gene | 4510063 | 4511352 | 960223 | 961512 | gene=IY08_23910 | protein=molybdopterin molybdenumtransferase                       | protein_id=KGT42236.1 |
| gene | 4511436 | 4511921 | 961596 | 962081 | gene=IY08_23915 | protein=molybdenum cofactor biosynthesis protein C                | protein_id=KGT42237.1 |
| gene | 4511959 | 4512972 | 962119 | 963132 | gene=IY08_23920 | protein=thiamine biosynthesis protein MoeB                        | protein_id=KGT42238.1 |
| gene | 4512989 | 4514002 | 963149 | 964162 | gene=IY08_23925 | protein=molybdenum cofactor biosynthesis protein A                | protein_id=KGT42239.1 |
| gene | 4514203 | 4518132 | 964363 | 968292 | gene=IY08_23930 | protein=BclA                                                      | protein_id=KGT42240.1 |
| gene | 4518249 | 4518572 | 968409 | 968732 | gene=IY08_23935 | protein=hypothetical protein                                      | protein_id=KGT42241.1 |
| gene | 4518593 | 4518817 | 968753 | 968977 | gene=IY08_23940 | protein=hypothetical protein                                      | protein_id=KGT42242.1 |
| gene | 4518896 | 4519201 | 969056 | 969361 | gene=IY08_23945 | protein=sulfurtransferase                                         | protein_id=KGT42243.1 |
| gene | 4519399 | 4519581 | 969559 | 969741 | gene=IY08_23950 | protein=4-hydroxy-2-ketovalerate aldolase                         | protein_id=KGT42244.1 |
| gene | 4519631 | 4520755 | 969791 | 970915 | gene=IY08_23955 | protein=homoserine acetyltransferase                              | protein_id=KGT42245.1 |
| gene | 4521571 | 4522938 | 971731 | 973098 | gene=IY08_23960 | protein=spore germination protein GerA                            | protein_id=KGT42246.1 |
| gene | 4522955 | 4524049 | 973115 | 974209 | gene=IY08_23965 | protein=spore germination protein GerH                            | protein_id=KGT42247.1 |
| gene | 4524025 | 4525104 | 974185 | 975264 | gene=IY08_23970 | protein=spore germination protein GerH                            | protein_id=KGT42248.1 |
| gene | 4525195 | 4525380 | 975355 | 975540 | gene=IY08_23975 | protein=hypothetical protein                                      | protein_id=KGT42249.1 |
| gene | 4525478 | 4525900 | 975638 | 976060 | gene=IY08_23980 | protein=Cof                                                       | protein_id=KGT42250.1 |
| gene | 4525945 | 4526889 | 976105 | 977049 | gene=IY08_23985 | protein=VrrB                                                      | protein_id=KGT42251.1 |
| gene | 4527040 | 4527468 | 977200 | 977628 | gene=IY08_23990 | protein=acetyltransferase                                         | protein_id=KGT42252.1 |
| gene | 4527496 | 4529904 | 977656 | 980064 | gene=IY08_23995 | protein=leucyl-tRNA synthetase                                    | protein_id=KGT42253.1 |
| gene | 4530377 | 4531570 | 980537 | 981730 | gene=IY08_24000 | protein=multidrug MFS transporter                                 | protein_id=KGT42254.1 |
| gene | 4531870 | 4533093 | 982030 | 983253 | gene=IY08_24005 | protein=potassium transporter                                     | protein_id=KGT42255.1 |
| gene | 4533097 | 4533594 | 983257 | 983754 | gene=IY08_24010 | protein=potassium transporter                                     | protein_id=KGT42256.1 |
| gene | 4533628 | 4534194 | 983788 | 984354 | gene=IY08_24015 | protein=integrase                                                 | protein_id=KGT42257.1 |

|      |         |         |         |         |                 |                                                                   |                       |
|------|---------|---------|---------|---------|-----------------|-------------------------------------------------------------------|-----------------------|
| gene | 4534542 | 4536401 | 984702  | 986561  | gene=IY08_24020 | protein=ABC transporter permease                                  | protein_id=KGT42258.1 |
| gene | 4536418 | 4537179 | 986578  | 987339  | gene=IY08_24025 | protein=bacitracin ABC transporter ATP-binding protein            | protein_id=KGT42259.1 |
| gene | 4537535 | 4538557 | 987695  | 988717  | gene=IY08_24030 | protein=membrane protein                                          | protein_id=KGT42260.1 |
| gene | 4538694 | 4538843 | 988854  | 989003  | gene=IY08_24035 | protein=glycogen biosynthesis protein GlgD                        | protein_id=KGT42261.1 |
| gene | 4538859 | 4539122 | 989019  | 989282  | gene=IY08_24040 | protein=hypothetical protein                                      | protein_id=KGT42262.1 |
| gene | 4539234 | 4540193 | 989394  | 990353  | gene=IY08_24045 | protein=hypothetical protein                                      | protein_id=KGT42263.1 |
| gene | 4540190 | 4540762 | 990350  | 990922  | gene=IY08_24050 | protein=rRNA methyltransferase                                    | protein_id=KGT42264.1 |
| gene | 4541045 | 4541878 | 991205  | 992038  | gene=IY08_24055 | protein=ABC transporter ATP-binding protein                       | protein_id=KGT42265.1 |
| gene | 4541897 | 4542577 | 992057  | 992737  | gene=IY08_24060 | protein=ABC transporter permease                                  | protein_id=KGT42266.1 |
| gene | 4542602 | 4543276 | 992762  | 993436  | gene=IY08_24065 | protein=amino acid racemase                                       | protein_id=KGT42267.1 |
| gene | 4543432 | 4544733 | 993592  | 994893  | gene=IY08_24070 | protein=sulfite reductase subunit alpha                           | protein_id=KGT42268.1 |
| gene | 4544771 | 4545835 | 994931  | 995995  | gene=IY08_24075 | protein=tetraprenyl-beta-curcumene synthase                       | protein_id=KGT42269.1 |
| gene | 4545876 | 4546679 | 996036  | 996839  | gene=IY08_24080 | protein=phospholipase                                             | protein_id=KGT42270.1 |
| gene | 4546754 | 4547266 | 996914  | 997426  | gene=IY08_24085 | protein=transferase                                               | protein_id=KGT42271.1 |
| gene | 4547410 | 4547943 | 997570  | 998103  | gene=IY08_24090 | protein=phosphoesterase                                           | protein_id=KGT42272.1 |
| gene | 4547956 | 4549098 | 998116  | 999258  | gene=IY08_24095 | protein=glycosyl transferase                                      | protein_id=KGT42273.1 |
| gene | 4549380 | 4549982 | 999540  | 1000142 | gene=IY08_24100 | protein=molybdopterin-guanine dinucleotide biosynthesis protein A | protein_id=KGT42274.1 |
| gene | 4549979 | 4550488 | 1000139 | 1000648 | gene=IY08_24105 | protein=molybdenum cofactor biosynthesis protein B                | protein_id=KGT42275.1 |
| gene | 4550725 | 4550904 | 1000885 | 1001064 | gene=IY08_24110 | protein=hypothetical protein                                      | protein_id=KGT42276.1 |
| gene | 4550911 | 4551090 | 1001071 | 1001250 | gene=IY08_24115 | protein=hypothetical protein                                      | protein_id=KGT42277.1 |
| gene | 4551111 | 4551635 | 1001271 | 1001795 | gene=IY08_24120 | protein=acetyltransferase                                         | protein_id=KGT42278.1 |
| gene | 4551677 | 4552876 | 1001837 | 1003036 | gene=IY08_24125 | protein=S-adenosylmethionine synthetase                           | protein_id=KGT42279.1 |
| gene | 4553396 | 4554982 | 1003556 | 1005142 | gene=IY08_24130 | protein=phosphoenolpyruvate carboxykinase                         | protein_id=KGT42280.1 |
| gene | 4555317 | 4555700 | 1005477 | 1005860 | gene=IY08_24135 | protein=ATP synthase subunit I                                    | protein_id=KGT42281.1 |
| gene | 4555980 | 4556201 | 1006140 | 1006361 | gene=IY08_24140 | protein=hypothetical protein                                      | protein_id=KGT42282.1 |
| gene | 4556230 | 4557135 | 1006390 | 1007295 | gene=IY08_24145 | protein=membrane protein                                          | protein_id=KGT42283.1 |
| gene | 4557433 | 4557756 | 1007593 | 1007916 | gene=IY08_24150 | protein=heme biosynthesis protein HemY                            | protein_id=KGT42284.1 |
| gene | 4557922 | 4558098 | 1008082 | 1008258 | gene=IY08_24155 | protein=hypothetical protein                                      | protein_id=KGT42285.1 |
| gene | 4558131 | 4559051 | 1008291 | 1009211 | gene=IY08_24160 | protein=hypothetical protein                                      | protein_id=KGT42286.1 |
| gene | 4559474 | 4560694 | 1009634 | 1010854 | gene=IY08_24165 | protein=histidine kinase                                          | protein_id=KGT42287.1 |

|      |         |         |         |         |                 |                                                                   |                       |
|------|---------|---------|---------|---------|-----------------|-------------------------------------------------------------------|-----------------------|
| gene | 4560691 | 4561944 | 1010851 | 1012104 | gene=IY08_24170 | protein=histidine kinase                                          | protein_id=KGT42288.1 |
| gene | 4562195 | 4563004 | 1012355 | 1013164 | gene=IY08_24175 | protein=alpha/beta hydrolase                                      | protein_id=KGT42289.1 |
| gene | 4563213 | 4565282 | 1013373 | 1015442 | gene=IY08_24180 | protein=phosphoglycerol transferase                               | protein_id=KGT42290.1 |
| gene | 4565663 | 4565893 | 1015823 | 1016053 | gene=IY08_24185 | protein=Heme/copper-type cytochrome/quinol oxidase                | protein_id=KGT42291.1 |
| gene | 4565904 | 4566200 | 1016064 | 1016360 | gene=IY08_24190 | protein=hypothetical protein                                      | protein_id=KGT42292.1 |
| gene | 4566321 | 4567328 | 1016481 | 1017488 | gene=IY08_24195 | protein=hypothetical protein                                      | protein_id=KGT42293.1 |
| gene | 4567340 | 4568104 | 1017500 | 1018264 | gene=IY08_24200 | protein=spermidine/putrescine ABC transporter ATP-binding protein | protein_id=KGT42294.1 |
| gene | 4568097 | 4568903 | 1018257 | 1019063 | gene=IY08_24205 | protein=ABC transporter permease                                  | protein_id=KGT42295.1 |
| gene | 4568938 | 4569165 | 1019098 | 1019325 | gene=IY08_24210 | protein=hypothetical protein                                      | protein_id=KGT42296.1 |
| gene | 4569393 | 4570505 | 1019553 | 1020665 | gene=IY08_24215 | protein=hypothetical protein                                      | protein_id=KGT42297.1 |
| gene | 4570598 | 4571269 | 1020758 | 1021429 | gene=IY08_24220 | protein=HAD family hydrolase                                      | protein_id=KGT42298.1 |
| gene | 4571475 | 4572011 | 1021635 | 1022171 | gene=IY08_24225 | protein=diaminopimelate epimerase                                 | protein_id=KGT42299.1 |
| gene | 4572124 | 4572603 | 1022284 | 1022763 | gene=IY08_24230 | protein=7,8-dihydro-8-oxoguanine-triphosphatase                   | protein_id=KGT42300.1 |
| gene | 4572688 | 4573005 | 1022848 | 1023165 | gene=IY08_24235 | protein=hydrolase                                                 | protein_id=KGT42301.1 |
| gene | 4573089 | 4573238 | 1023249 | 1023398 | gene=IY08_24240 | protein=ABC transporter ATP-binding protein                       | protein_id=KGT42302.1 |
| gene | 4573404 | 4573631 | 1023564 | 1023791 | gene=IY08_24250 | protein=hypothetical protein                                      | protein_id=KGT42303.1 |
| gene | 4573657 | 4573908 | 1023817 | 1024068 | gene=IY08_24255 | protein=hypothetical protein                                      | protein_id=KGT42304.1 |
| gene | 4573984 | 4574226 | 1024144 | 1024386 | gene=IY08_24260 | protein=hypothetical protein                                      | protein_id=KGT42305.1 |
| gene | 4574259 | 4574732 | 1024419 | 1024892 | gene=IY08_24265 | protein=S-ribosylhomocysteinase                                   | protein_id=KGT42306.1 |
| gene | 4574861 | 4575097 | 1025021 | 1025257 | gene=IY08_24270 | protein=hypothetical protein                                      | protein_id=KGT42307.1 |
| gene | 4575094 | 4575657 | 1025254 | 1025817 | gene=IY08_24275 | protein=carbonic anhydrase                                        | protein_id=KGT42308.1 |
| gene | 4575882 | 4577231 | 1026042 | 1027391 | gene=IY08_24280 | protein=cytochrome D ubiquinol oxidase subunit I                  | protein_id=KGT42309.1 |
| gene | 4577221 | 4578249 | 1027381 | 1028409 | gene=IY08_24285 | protein=cytochrome C oxidase assembly protein                     | protein_id=KGT42310.1 |
| gene | 4578416 | 4578649 | 1028576 | 1028809 | gene=IY08_24290 | protein=spore germination protein GerPF                           | protein_id=KGT42311.1 |
| gene | 4579324 | 4580358 | 1029484 | 1030518 | gene=IY08_24295 | protein=membrane protein                                          | protein_id=KGT42312.1 |
| gene | 4580546 | 4581418 | 1030706 | 1031578 | gene=IY08_24300 | protein=membrane protein                                          | protein_id=KGT42313.1 |
| gene | 4581635 | 4582453 | 1031795 | 1032613 | gene=IY08_24305 | protein=lipoprotein                                               | protein_id=KGT42314.1 |
| gene | 4582466 | 4582972 | 1032626 | 1033132 | gene=IY08_24310 | protein=hypothetical protein                                      | protein_id=KGT42315.1 |
| gene | 4582994 | 4583398 | 1033154 | 1033558 | gene=IY08_24315 | protein=cell surface protein                                      | protein_id=KGT42316.1 |
| gene | 4583478 | 4584143 | 1033638 | 1034303 | gene=IY08_24320 | protein=phage-shock protein                                       | protein_id=KGT42317.1 |

|      |         |         |         |         |                 |                                                        |                       |
|------|---------|---------|---------|---------|-----------------|--------------------------------------------------------|-----------------------|
| gene | 4584547 | 4585125 | 1034707 | 1035285 | gene=IY08_24325 | protein=hypothetical protein                           | protein_id=KGT42318.1 |
| gene | 4585162 | 4585332 | 1035322 | 1035492 | gene=IY08_24330 | protein=hydrolase                                      | protein_id=KGT42319.1 |
| gene | 4585346 | 4587334 | 1035506 | 1037494 | gene=IY08_24335 | protein=ferrous iron transporter B                     | protein_id=KGT42320.1 |
| gene | 4587331 | 4587558 | 1037491 | 1037718 | gene=IY08_24340 | protein=iron transporter FeoA                          | protein_id=KGT42321.1 |
| gene | 4587941 | 4588612 | 1038101 | 1038772 | gene=IY08_24345 | protein=proton-coupled thiamine transporter YuaJ       | protein_id=KGT42322.1 |
| gene | 4588821 | 4590671 | 1038981 | 1040831 | gene=IY08_24350 | protein=histidine kinase                               | protein_id=KGT42323.1 |
| gene | 4590668 | 4591357 | 1040828 | 1041517 | gene=IY08_24355 | protein=PhoB family transcriptional regulator          | protein_id=KGT42324.1 |
| gene | 4591397 | 4592017 | 1041557 | 1042177 | gene=IY08_24360 | protein=peptidase                                      | protein_id=KGT42325.1 |
| gene | 4592107 | 4592598 | 1042267 | 1042758 | gene=IY08_24365 | protein=cell surface protein                           | protein_id=KGT42326.1 |
| gene | 4592778 | 4593110 | 1042938 | 1043270 | gene=IY08_24370 | protein=hypothetical protein                           | protein_id=KGT42327.1 |
| gene | 4593294 | 4593509 | 1043454 | 1043669 | gene=IY08_24375 | protein=membrane protein                               | protein_id=KGT42328.1 |
| gene | 4593671 | 4594198 | 1043831 | 1044358 | gene=IY08_24380 | protein=hypoxanthine phosphoribosyltransferase         | protein_id=KGT42329.1 |
| gene | 4594374 | 4595276 | 1044534 | 1045436 | gene=IY08_24385 | protein=bis(5'-nucleosyl)-tetrphosphatase              | protein_id=KGT42330.1 |
| gene | 4595317 | 4595826 | 1045477 | 1045986 | gene=IY08_24390 | protein=hypothetical protein                           | protein_id=KGT42331.1 |
| gene | 4595851 | 4596522 | 1046011 | 1046682 | gene=IY08_24395 | protein=hypothetical protein                           | protein_id=KGT42332.1 |
| gene | 4596712 | 4597683 | 1046872 | 1047843 | gene=IY08_24400 | protein=ATPase                                         | protein_id=KGT42333.1 |
| gene | 4597724 | 4598482 | 1047884 | 1048642 | gene=IY08_24405 | protein=lipoyl synthase                                | protein_id=KGT42334.1 |
| gene | 4598467 | 4598736 | 1048627 | 1048896 | gene=IY08_24410 | protein=hypothetical protein                           | protein_id=KGT42335.1 |
| gene | 4599031 | 4599210 | 1049191 | 1049370 | gene=IY08_24415 | protein=hypothetical protein                           | protein_id=KGT42336.1 |
| gene | 4599320 | 4599919 | 1049480 | 1050079 | gene=IY08_24420 | protein=alkaline phosphatase                           | protein_id=KGT42337.1 |
| gene | 4599919 | 4600497 | 1050079 | 1050657 | gene=IY08_24425 | protein=SAM-dependent methyltransferase                | protein_id=KGT42338.1 |
| gene | 4600640 | 4602589 | 1050800 | 1052749 | gene=IY08_24430 | protein=ABC transporter permease                       | protein_id=KGT42339.1 |
| gene | 4602576 | 4603346 | 1052736 | 1053506 | gene=IY08_24435 | protein=bacitracin ABC transporter ATP-binding protein | protein_id=KGT42340.1 |
| gene | 4603653 | 4604525 | 1053813 | 1054685 | gene=IY08_24440 | protein=AraC family transcriptional regulator          | protein_id=KGT42341.1 |
| gene | 4604576 | 4605214 | 1054736 | 1055374 | gene=IY08_24445 | protein=hypothetical protein                           | protein_id=KGT42342.1 |
| gene | 4605238 | 4605873 | 1055398 | 1056033 | gene=IY08_24450 | protein=membrane protein SdpI                          | protein_id=KGT42343.1 |
| gene | 4605870 | 4606142 | 1056030 | 1056302 | gene=IY08_24455 | protein=ArsR family transcriptional regulator          | protein_id=KGT42344.1 |
| gene | 4606352 | 4607047 | 1056512 | 1057207 | gene=IY08_24460 | protein=transcriptional regulator                      | protein_id=KGT42345.1 |
| gene | 4607050 | 4608072 | 1057210 | 1058232 | gene=IY08_24465 | protein=membrane protein                               | protein_id=KGT42346.1 |
| gene | 4608167 | 4610146 | 1058327 | 1060306 | gene=IY08_24470 | protein=ABC transporter permease                       | protein_id=KGT42347.1 |
| gene | 4610215 | 4612170 | 1060375 | 1062330 | gene=IY08_24475 | protein=ABC transporter permease                       | protein_id=KGT42348.1 |

|      |         |         |         |         |                 |                                                                                 |                       |
|------|---------|---------|---------|---------|-----------------|---------------------------------------------------------------------------------|-----------------------|
| gene | 4612191 | 4612943 | 1062351 | 1063103 | gene=IY08_24480 | protein=bacitracin ABC transporter ATP-binding protein                          | protein_id=KGT42349.1 |
| gene | 4612940 | 4614913 | 1063100 | 1065073 | gene=IY08_24485 | protein=ABC transporter permease                                                | protein_id=KGT42350.1 |
| gene | 4614967 | 4615158 | 1065127 | 1065318 | gene=IY08_24490 | protein=hypothetical protein                                                    | protein_id=KGT42351.1 |
| gene | 4615327 | 4616652 | 1065487 | 1066812 | gene=IY08_24495 | protein=hypothetical protein                                                    | protein_id=KGT42352.1 |
| gene | 4616768 | 4617493 | 1066928 | 1067653 | gene=IY08_24500 | protein=GntR family transcriptional regulator                                   | protein_id=KGT42353.1 |
| gene | 4617493 | 4618509 | 1067653 | 1068669 | gene=IY08_24505 | protein=2-dehydro-3-deoxygluconokinase                                          | protein_id=KGT42354.1 |
| gene | 4618502 | 4619257 | 1068662 | 1069417 | gene=IY08_24510 | protein=2-dehydro-3-deoxyphosphooctonate aldolase                               | protein_id=KGT42355.1 |
| gene | 4619259 | 4620362 | 1069419 | 1070522 | gene=IY08_24515 | protein=L-seryl-tRNA selenium transferase                                       | protein_id=KGT42356.1 |
| gene | 4620340 | 4621440 | 1070500 | 1071600 | gene=IY08_24520 | protein=amidohydrolase                                                          | protein_id=KGT42357.1 |
| gene | 4621798 | 4622658 | 1071958 | 1072818 | gene=IY08_24525 | protein=D-alanyl-D-alanine carboxypeptidase                                     | protein_id=KGT42358.1 |
| gene | 4622741 | 4623847 | 1072901 | 1074007 | gene=IY08_24530 | protein=histidine kinase                                                        | protein_id=KGT42359.1 |
| gene | 4623840 | 4624538 | 1074000 | 1074698 | gene=IY08_24535 | protein=DeoR family transcriptional regulator                                   | protein_id=KGT42360.1 |
| gene | 4624794 | 4625900 | 1074954 | 1076060 | gene=IY08_24540 | protein=N-acylamino acid racemase                                               | protein_id=KGT42361.1 |
| gene | 4626056 | 4627212 | 1076216 | 1077372 | pseudo          |                                                                                 |                       |
| gene | 4627209 | 4627661 | 1077369 | 1077821 | gene=IY08_24550 | protein=DNA-binding protein                                                     | protein_id=KGT42362.1 |
| gene | 4627821 | 4629305 | 1077981 | 1079465 | gene=IY08_24560 | protein=O-succinylbenzoic acid--CoA ligase                                      | protein_id=KGT42363.1 |
| gene | 4629623 | 4630441 | 1079783 | 1080601 | gene=IY08_24565 | protein=dihydroxynaphthoic acid synthetase                                      | protein_id=KGT42364.1 |
| gene | 4630511 | 4631323 | 1080671 | 1081483 | gene=IY08_24570 | protein=esterase                                                                | protein_id=KGT42365.1 |
| gene | 4631320 | 4633074 | 1081480 | 1083234 | gene=IY08_24575 | protein=2-succinyl-5-enolpyruvyl-6-hydroxy-3-cyclohexene-1-carboxylate synthase | protein_id=KGT42366.1 |
| gene | 4633071 | 4634465 | 1083231 | 1084625 | gene=IY08_24580 | protein=isochorismate synthase                                                  | protein_id=KGT42367.1 |
| gene | 4634660 | 4635613 | 1084820 | 1085773 | gene=IY08_24590 | protein=1,4-dihydroxy-2-naphthoate octaprenyltransferase                        | protein_id=KGT42368.1 |
| gene | 4635723 | 4636454 | 1085883 | 1086614 | gene=IY08_24595 | protein=hypothetical protein                                                    | protein_id=KGT42369.1 |
| gene | 4636499 | 4636699 | 1086659 | 1086859 | gene=IY08_24600 | protein=cold-shock protein                                                      | protein_id=KGT42370.1 |
| gene | 4637091 | 4637873 | 1087251 | 1088033 | gene=IY08_24605 | protein=hypothetical protein                                                    | protein_id=KGT42371.1 |
| gene | 4638088 | 4638237 | 1088248 | 1088397 | gene=IY08_24610 | protein=alcohol dehydrogenase                                                   | protein_id=KGT42372.1 |
| gene | 4638576 | 4639298 | 1088736 | 1089458 | gene=IY08_24615 | protein=lipase                                                                  | protein_id=KGT42373.1 |
| gene | 4639375 | 4639509 | 1089535 | 1089669 | gene=IY08_24620 | protein=hypothetical protein                                                    | protein_id=KGT42374.1 |
| gene | 4639613 | 4642021 | 1089773 | 1092181 | gene=IY08_24625 | protein=maltodextrin phosphorylase                                              | protein_id=KGT42375.1 |
| gene | 4642040 | 4643470 | 1092200 | 1093630 | gene=IY08_24630 | protein=glycogen synthase                                                       | protein_id=KGT42376.1 |
| gene | 4643583 | 4644617 | 1093743 | 1094777 | gene=IY08_24635 | protein=glycogen biosynthesis protein glgD                                      | protein_id=KGT42377.1 |



|            |         |         |         |         |                 |                                                           |                       |
|------------|---------|---------|---------|---------|-----------------|-----------------------------------------------------------|-----------------------|
| gene       | 4644636 | 4645766 | 1094796 | 1095926 | gene=glgC       | protein=glucose-1-phosphate adenylyltransferase           | protein_id=KGT42378.1 |
| gene       | 4645714 | 4647651 | 1095874 | 1097811 | gene=IY08_24645 | protein=glycogen branching protein                        | protein_id=KGT42379.1 |
| gene       | 4648240 | 4648857 | 1098400 | 1099017 | gene=IY08_24650 | protein=hypothetical protein                              | protein_id=KGT42380.1 |
| gene       | 4649079 | 4650023 | 1099239 | 1100183 | gene=IY08_24655 | protein=lactate dehydrogenase                             | protein_id=KGT42381.1 |
| gene       | 4650699 | 4650770 | 1100859 | 1100930 | tRNA            |                                                           |                       |
| gene       | 4650776 | 4650866 | 1100936 | 1101026 | tRNA            |                                                           |                       |
| gene       | 4650874 | 4650948 | 1101034 | 1101108 | tRNA            |                                                           |                       |
| scaffold18 |         |         |         |         |                 |                                                           |                       |
| gene       | 4651396 | 4652076 | 436     | 1116    | gene=IY08_24680 | protein=methyltransferase                                 | protein_id=KGT41359   |
| gene       | 4652169 | 4653164 | 1209    | 2204    | gene=IY08_24685 | protein=potassium channel protein                         | protein_id=KGT41360   |
| gene       | 4653151 | 4653564 | 2191    | 2604    | gene=IY08_24690 | protein=hypothetical protein                              | protein_id=KGT41361   |
| gene       | 4653672 | 4655024 | 2712    | 4064    | gene=IY08_24695 | protein=glucose-6-phosphate isomerase                     | protein_id=KGT41362   |
| gene       | 4654993 | 4655199 | 4033    | 4239    | gene=IY08_24700 | protein=hypothetical protein                              | protein_id=KGT41363   |
| gene       | 4655299 | 4655532 | 4339    | 4572    | gene=IY08_24705 | protein=membrane protein                                  | protein_id=KGT41364   |
| gene       | 4655642 | 4655986 | 4682    | 5026    | gene=IY08_24710 | protein=general stress protein                            | protein_id=KGT41365   |
| gene       | 4656240 | 4657430 | 5280    | 6470    | gene=IY08_24715 | protein=aromatic amino acid aminotransferase              | protein_id=KGT41366   |
| gene       | 4657427 | 4657924 | 6467    | 6964    | gene=IY08_24720 | protein=AsnC family transcriptional regulator             | protein_id=KGT41367   |
| gene       | 4658043 | 4659035 | 7083    | 8075    | gene=IY08_24725 | protein=bifunctional glyoxylate/hydroxypyruvate reductase | protein_id=KGT41368   |
| gene       | 4659145 | 4659984 | 8185    | 9024    | gene=IY08_24730 | protein=hydrolase                                         | protein_id=KGT41369   |
| gene       | 4660105 | 4660356 | 9145    | 9396    | gene=IY08_24735 | protein=hypothetical protein                              | protein_id=KGT41370   |
| gene       | 4660474 | 4661625 | 9514    | 10665   | gene=IY08_24740 | protein=cystathionine beta-lyase                          | protein_id=KGT41371   |
| gene       | 4661803 | 4662342 | 10843   | 11382   | gene=IY08_24745 | protein=superoxide dismutase                              | protein_id=KGT41372   |
| gene       | 4662411 | 4662587 | 11451   | 11627   | gene=IY08_24750 | protein=hypothetical protein                              | protein_id=KGT41373   |
| gene       | 4662752 | 4663135 | 11792   | 12175   | gene=IY08_24755 | protein=kinase                                            | protein_id=KGT41374   |
| gene       | 4663176 | 4663799 | 12216   | 12839   | gene=IY08_24760 | protein=sporulation inhibitor KapD                        | protein_id=KGT41375   |
| gene       | 4664090 | 4665415 | 13130   | 14455   | gene=IY08_24765 | protein=membrane protein                                  | protein_id=KGT41376   |
| gene       | 4665484 | 4665951 | 14524   | 14991   | gene=IY08_24770 | protein=hypothetical protein                              | protein_id=KGT41377   |
| gene       | 4666069 | 4666782 | 15109   | 15822   | gene=IY08_24775 | protein=DNA alkylation repair protein                     | protein_id=KGT41378   |
| gene       | 4667129 | 4668505 | 16169   | 17545   | gene=IY08_24780 | protein=glycyl-tRNA ligase                                | protein_id=KGT41379   |
| gene       | 4668545 | 4668928 | 17585   | 17968   | gene=IY08_24785 | protein=esterase                                          | protein_id=KGT41380   |
| gene       | 4669024 | 4669767 | 18064   | 18807   | gene=IY08_24790 | protein=ferritin                                          | protein_id=KGT41381   |

|            |         |         |       |       |                 |                                                                                     |                       |
|------------|---------|---------|-------|-------|-----------------|-------------------------------------------------------------------------------------|-----------------------|
| gene       | 4669818 | 4670411 | 18858 | 19451 | gene=IY08_24795 | protein=biotin biosynthesis protein BioC                                            | protein_id=KGT41382   |
| gene       | 4670456 | 4671343 | 19496 | 20383 | gene=IY08_24800 | protein=UTP--glucose-1-phosphate uridylyltransferase                                | protein_id=KGT41383   |
| gene       | 4671451 | 4673175 | 20491 | 22215 | gene=IY08_24805 | protein=phosphoglucomutase                                                          | protein_id=KGT41384   |
| gene       | 4673319 | 4673924 | 22359 | 22964 | gene=IY08_24810 | protein=hypothetical protein                                                        | protein_id=KGT41385   |
| gene       | 4674337 | 4675578 | 23377 | 24618 | gene=IY08_24815 | protein=leucyl aminopeptidase                                                       | protein_id=KGT41386   |
| gene       | 4676130 | 4676474 | 25170 | 25514 | gene=IY08_24825 | protein=transporter                                                                 | protein_id=KGT41387   |
| scaffold19 |         |         |       |       |                 |                                                                                     |                       |
| gene       | 4676701 | 4676921 | 1     | 221   | gene=IY08_24830 | protein=phosphoribose diphosphate:decaprenyl-phosphate<br>phosphoribosyltransferase | protein_id=KGT41285.1 |
| gene       | 4677117 | 4677737 | 417   | 1037  | gene=IY08_24835 | protein=hypothetical protein                                                        | protein_id=KGT41286.1 |
| gene       | 4677824 | 4678141 | 1124  | 1441  | gene=IY08_24840 | protein=membrane protein                                                            | protein_id=KGT41287.1 |
| gene       | 4678138 | 4678644 | 1438  | 1944  | gene=IY08_24845 | protein=NUDIX hydrolase                                                             | protein_id=KGT41288.1 |
| gene       | 4678768 | 4679976 | 2068  | 3276  | gene=IY08_24850 | protein=NADH dehydrogenase                                                          | protein_id=KGT41289.1 |
| gene       | 4680438 | 4681427 | 3738  | 4727  | gene=IY08_24855 | protein=ferredoxin-NADP reductase                                                   | protein_id=KGT41290.1 |
| gene       | 4681539 | 4690445 | 4839  | 13745 | gene=IY08_24860 | protein=cell surface protein                                                        | protein_id=KGT41291.1 |
| gene       | 4690916 | 4691395 | 14216 | 14695 | gene=IY08_24865 | protein=DNA-binding protein                                                         | protein_id=KGT41292.1 |
| gene       | 4691561 | 4692808 | 14861 | 16108 | gene=IY08_24870 | protein=macrolide transporter                                                       | protein_id=KGT41293.1 |
| gene       | 4692826 | 4693707 | 16126 | 17007 | gene=IY08_24875 | protein=decarboxylase                                                               | protein_id=KGT41294.1 |
| gene       | 4693787 | 4694248 | 17087 | 17548 | gene=IY08_24880 | protein=hypothetical protein                                                        | protein_id=KGT41295.1 |
| gene       | 4694278 | 4694631 | 17578 | 17931 | gene=IY08_24885 | protein=membrane protein                                                            | protein_id=KGT41296.1 |
| gene       | 4695518 | 4695871 | 18818 | 19171 | gene=IY08_24895 | protein=hypothetical protein                                                        | protein_id=KGT41297.1 |
| gene       | 4695913 | 4696779 | 19213 | 20079 | gene=IY08_24900 | protein=diaminopimelate epimerase                                                   | protein_id=KGT41298.1 |
| gene       | 4697048 | 4697287 | 20348 | 20587 | gene=IY08_24905 | protein=hypothetical protein                                                        | protein_id=KGT41299.1 |
| gene       | 4697634 | 4698704 | 20934 | 22004 | gene=IY08_24910 | protein=NADH dehydrogenase                                                          | protein_id=KGT41300.1 |
| gene       | 4698938 | 4699111 | 22238 | 22411 | gene=IY08_24915 | protein=stage II sporulation protein E                                              | protein_id=KGT41301.1 |
| gene       | 4699167 | 4699826 | 22467 | 23126 | gene=IY08_24920 | protein=ABC transporter ATP-binding protein                                         | protein_id=KGT41302.1 |
| gene       | 4699810 | 4700607 | 23110 | 23907 | gene=IY08_24925 | protein=membrane protein                                                            | protein_id=KGT41303.1 |
| gene       | 4700807 | 4701148 | 24107 | 24448 | gene=IY08_24930 | protein=alkylphosphonate utilization protein                                        | protein_id=KGT41304.1 |
| gene       | 4701308 | 4701589 | 24608 | 24889 | gene=IY08_24935 | protein=hypothetical protein                                                        | protein_id=KGT41305.1 |
| gene       | 4701659 | 4702447 | 24959 | 25747 | gene=IY08_24940 | protein=hypothetical protein                                                        | protein_id=KGT41306.1 |
| gene       | 4702824 | 4703156 | 26124 | 26456 | gene=IY08_24945 | protein=hypothetical protein                                                        | protein_id=KGT41307.1 |

|      |         |         |       |       |                 |                                                   |                       |
|------|---------|---------|-------|-------|-----------------|---------------------------------------------------|-----------------------|
| gene | 4703207 | 4703875 | 26507 | 27175 | gene=IY08_24950 | protein=hypothetical protein                      | protein_id=KGT41308.1 |
| gene | 4703999 | 4704793 | 27299 | 28093 | gene=IY08_24955 | protein=nucleotidyltransferase                    | protein_id=KGT41309.1 |
| gene | 4704846 | 4705154 | 28146 | 28454 | gene=IY08_24960 | protein=disulfide oxidoreductase                  | protein_id=KGT41310.1 |
| gene | 4705350 | 4705586 | 28650 | 28886 | gene=IY08_24965 | protein=nitrogen fixation protein NifU            | protein_id=KGT41311.1 |
| gene | 4706017 | 4706232 | 29317 | 29532 | gene=IY08_24970 | protein=carbonic anhydrase                        | protein_id=KGT41312.1 |
| gene | 4706292 | 4707293 | 29592 | 30593 | gene=IY08_24975 | protein=spore coat protein CotS                   | protein_id=KGT41313.1 |
| gene | 4707414 | 4707905 | 30714 | 31205 | gene=IY08_24980 | protein=hypothetical protein                      | protein_id=KGT41314.1 |
| gene | 4707929 | 4708408 | 31229 | 31708 | gene=IY08_24985 | protein=acetyltransferase                         | protein_id=KGT41315.1 |
| gene | 4708571 | 4709674 | 31871 | 32974 | gene=IY08_24990 | protein=citrate lyase subunit beta                | protein_id=KGT41316.1 |
| gene | 4709619 | 4710965 | 32919 | 34265 | gene=IY08_24995 | protein=adenine/guanine phosphoribosyltransferase | protein_id=KGT41317.1 |
| gene | 4710971 | 4712083 | 34271 | 35383 | gene=IY08_25000 | protein=hypothetical protein                      | protein_id=KGT41318.1 |
| gene | 4712080 | 4712895 | 35380 | 36195 | gene=IY08_25005 | protein=haloacid dehalogenase                     | protein_id=KGT41319.1 |
| gene | 4713450 | 4714031 | 36750 | 37331 | gene=IY08_25015 | protein=NAD(P)H dehydrogenase                     | protein_id=KGT41320.1 |
| gene | 4714257 | 4715021 | 37557 | 38321 | gene=IY08_25020 | protein=HAD family hydrolase                      | protein_id=KGT41321.1 |
| gene | 4715131 | 4715763 | 38431 | 39063 | gene=IY08_25025 | protein=decarboxylase                             | protein_id=KGT41322.1 |
| gene | 4715844 | 4716284 | 39144 | 39584 | gene=IY08_25030 | protein=hypothetical protein                      | protein_id=KGT41323.1 |
| gene | 4716432 | 4717403 | 39732 | 40703 | gene=glpX       | protein=fructose 1,6-bisphosphatase               | protein_id=KGT41324.1 |
| gene | 4717420 | 4717686 | 40720 | 40986 | gene=IY08_25040 | protein=cytoplasmic protein                       | protein_id=KGT41325.1 |
| gene | 4717716 | 4717928 | 41016 | 41228 | pseudo          |                                                   |                       |
| gene | 4718057 | 4718554 | 41357 | 41854 | gene=IY08_25050 | protein=cytoplasmic protein                       | protein_id=KGT41326.1 |
| gene | 4718591 | 4718893 | 41891 | 42193 | gene=IY08_25055 | protein=hypothetical protein                      | protein_id=KGT41327.1 |
| gene | 4719012 | 4719590 | 42312 | 42890 | gene=IY08_25060 | protein=lipoprotein                               | protein_id=KGT41328.1 |
| gene | 4719625 | 4720359 | 42925 | 43659 | gene=IY08_25065 | protein=MerR family transcriptional regulator     | protein_id=KGT41329.1 |
| gene | 4720460 | 4721275 | 43760 | 44575 | gene=IY08_25070 | protein=membrane protein                          | protein_id=KGT41330.1 |
| gene | 4721306 | 4721739 | 44606 | 45039 | pseudo          |                                                   |                       |
| gene | 4721874 | 4722428 | 45174 | 45728 | gene=IY08_25080 | protein=phosphoglycerate mutase                   | protein_id=KGT41331.1 |
| gene | 4722503 | 4722982 | 45803 | 46282 | gene=IY08_25085 | protein=DNA-binding protein                       | protein_id=KGT41332.1 |
| gene | 4723003 | 4723899 | 46303 | 47199 | gene=IY08_25090 | protein=lipoyl synthase                           | protein_id=KGT41333.1 |
| gene | 4724089 | 4725072 | 47389 | 48372 | gene=IY08_25095 | protein=peptidase M23                             | protein_id=KGT41334.1 |
| gene | 4725146 | 4725877 | 48446 | 49177 | gene=IY08_25100 | protein=sporulation protein                       | protein_id=KGT41335.1 |
| gene | 4725932 | 4726234 | 49232 | 49534 | gene=IY08_25105 | protein=hypothetical protein                      | protein_id=KGT41336.1 |

|      |         |         |       |       |                 |                                                        |                       |
|------|---------|---------|-------|-------|-----------------|--------------------------------------------------------|-----------------------|
| gene | 4726300 | 4727580 | 49600 | 50880 | gene=IY08_25110 | protein=5'-nucleotidase                                | protein_id=KGT41337.1 |
| gene | 4728382 | 4729779 | 51682 | 53079 | gene=IY08_25115 | protein=Fe-S cluster assembly protein SufB             | protein_id=KGT41338.1 |
| gene | 4729828 | 4730259 | 53128 | 53559 | gene=IY08_25120 | protein=nitrogen fixation protein NifU                 | protein_id=KGT41339.1 |
| gene | 4730249 | 4731469 | 53549 | 54769 | gene=IY08_25125 | protein=cysteine desulfurase                           | protein_id=KGT41340.1 |
| gene | 4731469 | 4732761 | 54769 | 56061 | gene=IY08_25130 | protein=Fe-S cluster assembly protein SufD             | protein_id=KGT41341.1 |
| gene | 4732777 | 4733562 | 56077 | 56862 | gene=IY08_25135 | protein=iron ABC transporter ATP-binding protein       | protein_id=KGT41342.1 |
| gene | 4733801 | 4734613 | 57101 | 57913 | gene=IY08_25140 | protein=methionine ABC transporter substrate-binding   | protein_id=KGT41343.1 |
| gene | 4734636 | 4735301 | 57936 | 58601 | gene=IY08_25145 | protein=methionine ABC transporter permease            | protein_id=KGT41344.1 |
| gene | 4735294 | 4736319 | 58594 | 59619 | gene=IY08_25150 | protein=methionine ABC transporter ATP-binding protein | protein_id=KGT41345.1 |
| gene | 4736336 | 4736458 | 59636 | 59758 | pseudo          |                                                        |                       |
| gene | 4736861 | 4737205 | 60161 | 60505 | gene=IY08_25160 | protein=hypothetical protein                           | protein_id=KGT41346.1 |
| gene | 4737358 | 4737657 | 60658 | 60957 | gene=IY08_25170 | protein=thioredoxin                                    | protein_id=KGT41347.1 |
| gene | 4737670 | 4738014 | 60970 | 61314 | gene=IY08_25175 | protein=TOPRIM domain-containing protein               | protein_id=KGT41348.1 |
| gene | 4738634 | 4739017 | 61934 | 62317 | gene=IY08_25180 | protein=glycine cleavage system protein H              | protein_id=KGT41349.1 |
| gene | 4739059 | 4739424 | 62359 | 62724 | gene=IY08_25185 | protein=hypothetical protein                           | protein_id=KGT41350.1 |
| gene | 4739836 | 4740363 | 63136 | 63663 | gene=IY08_25190 | protein=lipoprotein                                    | protein_id=KGT41351.1 |
| gene | 4740507 | 4741154 | 63807 | 64454 | gene=IY08_25195 | protein=phosphoesterase                                | protein_id=KGT41352.1 |
| gene | 4741220 | 4742233 | 64520 | 65533 | gene=IY08_25200 | protein=membrane protein                               | protein_id=KGT41353.1 |
| gene | 4742256 | 4743206 | 65556 | 66506 | gene=ldh        | protein=lactate dehydrogenase                          | protein_id=KGT41354.1 |
| gene | 4743454 | 4743702 | 66754 | 67002 | gene=IY08_25210 | protein=coat protein F                                 | protein_id=KGT41355.1 |
| gene | 4743716 | 4743901 | 67016 | 67201 | gene=IY08_25215 | protein=hypothetical protein                           | protein_id=KGT41356.1 |
| gene | 4744714 | 4745262 | 68014 | 68562 | gene=IY08_25230 | protein=TetR family transcriptional regulator          | protein_id=KGT41357.1 |
| gene | 4745266 | 4745988 | 68566 | 69288 | gene=IY08_25235 | protein=metallo-beta-lactamase                         | protein_id=KGT41358.1 |
| gene | 4746168 | 4747952 | 69468 | 71252 | gene=IY08_25245 | protein=acyl-CoA dehydrogenase                         | protein_id=KGT40826.1 |
| gene | 4748051 | 4748167 | 71351 | 71467 | gene=IY08_25250 | protein=MerR family transcriptional regulator          | protein_id=KGT40827.1 |
| gene | 4748294 | 4749466 | 71594 | 72766 | gene=IY08_25260 | protein=acetyl-CoA acetyltransferase                   | protein_id=KGT40828.1 |
| gene | 4749488 | 4751869 | 72788 | 75169 | gene=IY08_25265 | protein=3-hydroxyacyl-CoA dehydrogenase                | protein_id=KGT40829.1 |
| gene | 4752105 | 4752251 | 75405 | 75551 | gene=IY08_25270 | protein=hypothetical protein                           | protein_id=KGT40830.1 |
| gene | 4752339 | 4753178 | 75639 | 76478 | gene=IY08_25275 | protein=D-alanyl-D-alanine carboxypeptidase            | protein_id=KGT40831.1 |
| gene | 4753201 | 4754118 | 76501 | 77418 | gene=IY08_25280 | protein=proline dehydrogenase                          | protein_id=KGT40832.1 |
| gene | 4754429 | 4754674 | 77729 | 77974 | gene=IY08_25285 | protein=hypothetical protein                           | protein_id=KGT40833.1 |

|      |         |         |        |        |                 |                                               |                       |
|------|---------|---------|--------|--------|-----------------|-----------------------------------------------|-----------------------|
| gene | 4754723 | 4755025 | 78023  | 78325  | gene=IY08_25290 | protein=hypothetical protein                  | protein_id=KGT40834.1 |
| gene | 4755103 | 4757103 | 78403  | 80403  | gene=IY08_25295 | protein=chemotaxis protein                    | protein_id=KGT40835.1 |
| gene | 4757290 | 4758048 | 80590  | 81348  | gene=IY08_25300 | protein=TrmB family transcriptional regulator | protein_id=KGT40836.1 |
| gene | 4758076 | 4758258 | 81376  | 81558  | gene=IY08_25305 | protein=hypothetical protein                  | protein_id=KGT40837.1 |
| gene | 4758335 | 4759507 | 81635  | 82807  | gene=IY08_25310 | protein=major facilitator transporter         | protein_id=KGT40838.1 |
| gene | 4759627 | 4760937 | 82927  | 84237  | gene=IY08_25315 | protein=serine/threonine protein kinase       | protein_id=KGT40839.1 |
| gene | 4761405 | 4761632 | 84705  | 84932  | gene=IY08_25320 | protein=accessory gene regulator AgrC         | protein_id=KGT40840.1 |
| gene | 4761710 | 4762525 | 85010  | 85825  | gene=IY08_25325 | protein=hypothetical protein                  | protein_id=KGT40841.1 |
| gene | 4762655 | 4763437 | 85955  | 86737  | gene=IY08_25330 | protein=hypothetical protein                  | protein_id=KGT40842.1 |
| gene | 4763466 | 4763750 | 86766  | 87050  | gene=IY08_25335 | protein=hypothetical protein                  | protein_id=KGT40843.1 |
| gene | 4764028 | 4764921 | 87328  | 88221  | gene=IY08_25340 | protein=hypothetical protein                  | protein_id=KGT40844.1 |
| gene | 4765027 | 4765548 | 88327  | 88848  | gene=IY08_25345 | protein=acetyltransferase                     | protein_id=KGT40845.1 |
| gene | 4766008 | 4766394 | 89308  | 89694  | gene=IY08_25350 | protein=hypothetical protein                  | protein_id=KGT40846.1 |
| gene | 4766642 | 4766782 | 89942  | 90082  | gene=IY08_25355 | protein=hypothetical protein                  | protein_id=KGT40847.1 |
| gene | 4766879 | 4767931 | 90179  | 91231  | gene=IY08_25360 | protein=cytochrome C oxidase subunit II       | protein_id=KGT40848.1 |
| gene | 4767974 | 4768681 | 91274  | 91981  | gene=IY08_25365 | protein=hypothetical protein                  | protein_id=KGT40849.1 |
| gene | 4768671 | 4768892 | 91971  | 92192  | gene=IY08_25370 | protein=XRE family transcriptional regulator  | protein_id=KGT40850.1 |
| gene | 4769123 | 4769737 | 92423  | 93037  | gene=IY08_25375 | protein=alkaline phosphatase                  | protein_id=KGT40851.1 |
| gene | 4770139 | 4770579 | 93439  | 93879  | gene=IY08_25380 | protein=hypothetical protein                  | protein_id=KGT40852.1 |
| gene | 4770610 | 4771071 | 93910  | 94371  | gene=IY08_25385 | protein=ErfK/YbiS/YcfS/YnhG family protein    | protein_id=KGT40853.1 |
| gene | 4771436 | 4772101 | 94736  | 95401  | gene=IY08_25390 | protein=transcriptional regulator             | protein_id=KGT40854.1 |
| gene | 4772079 | 4773521 | 95379  | 96821  | gene=IY08_25395 | protein=histidine kinase                      | protein_id=KGT40855.1 |
| gene | 4773663 | 4774565 | 96963  | 97865  | gene=IY08_25400 | protein=multidrug transporter                 | protein_id=KGT40856.1 |
| gene | 4774633 | 4774887 | 97933  | 98187  | gene=IY08_25405 | protein=hypothetical protein                  | protein_id=KGT40857.1 |
| gene | 4774929 | 4776563 | 98229  | 99863  | gene=IY08_25410 | protein=methionyl-tRNA synthetase             | protein_id=KGT40858.1 |
| gene | 4776999 | 4777817 | 100299 | 101117 | gene=IY08_25415 | protein=methyltransferase                     | protein_id=KGT40859.1 |
| gene | 4778231 | 4779925 | 101531 | 103225 | gene=IY08_25420 | protein=chemotaxis protein                    | protein_id=KGT40860.1 |
| gene | 4780139 | 4781830 | 103439 | 105130 | gene=IY08_25425 | protein=chemotaxis protein                    | protein_id=KGT40861.1 |
| gene | 4781950 | 4782267 | 105250 | 105567 | gene=IY08_25430 | protein=DNA methyltransferase                 | protein_id=KGT40862.1 |
| gene | 4782345 | 4783994 | 105645 | 107294 | gene=IY08_25435 | protein=peptidase M4                          | protein_id=KGT40863.1 |
| gene | 4784151 | 4784849 | 107451 | 108149 | gene=IY08_25440 | protein=pirin                                 | protein_id=KGT40864.1 |

|      |         |         |        |        |                 |                                                       |                       |
|------|---------|---------|--------|--------|-----------------|-------------------------------------------------------|-----------------------|
| gene | 4784901 | 4785311 | 108201 | 108611 | gene=IY08_25445 | protein=MarR family transcriptional regulator         | protein_id=KGT40865.1 |
| gene | 4785423 | 4785857 | 108723 | 109157 | gene=IY08_25450 | protein=hypothetical protein                          | protein_id=KGT40866.1 |
| gene | 4786023 | 4787222 | 109323 | 110522 | gene=IY08_25455 | protein=potassium transporter                         | protein_id=KGT40867.1 |
| gene | 4787227 | 4787721 | 110527 | 111021 | gene=IY08_25460 | protein=potassium transporter                         | protein_id=KGT40868.1 |
| gene | 4787776 | 4787949 | 111076 | 111249 | gene=IY08_25465 | protein=hypothetical protein                          | protein_id=KGT40869.1 |
| gene | 4788131 | 4789564 | 111431 | 112864 | gene=IY08_25470 | protein=sodium:alanine symporter                      | protein_id=KGT40870.1 |
| gene | 4789734 | 4790174 | 113034 | 113474 | gene=IY08_25475 | protein=general stress protein                        | protein_id=KGT40871.1 |
| gene | 4790824 | 4791021 | 114124 | 114321 | gene=IY08_25485 | protein=hypothetical protein                          | protein_id=KGT40872.1 |
| gene | 4791038 | 4791319 | 114338 | 114619 | pseudo          |                                                       |                       |
| gene | 4791424 | 4792002 | 114724 | 115302 | gene=IY08_25495 | protein=lysine decarboxylase                          | protein_id=KGT40873.1 |
| gene | 4792076 | 4792399 | 115376 | 115699 | gene=IY08_25500 | protein=hypothetical protein                          | protein_id=KGT40874.1 |
| gene | 4792453 | 4792959 | 115753 | 116259 | gene=IY08_25505 | protein=ferritin                                      | protein_id=KGT40875.1 |
| gene | 4793110 | 4794279 | 116410 | 117579 | gene=IY08_25510 | protein=hypothetical protein                          | protein_id=KGT40876.1 |
| gene | 4794323 | 4795504 | 117623 | 118804 | gene=IY08_25515 | protein=pyrimidine nucleoside transporter NupC        | protein_id=KGT40877.1 |
| gene | 4795855 | 4797036 | 119155 | 120336 | gene=IY08_25520 | protein=pyrimidine nucleoside transporter NupC        | protein_id=KGT40878.1 |
| gene | 4797332 | 4798774 | 120632 | 122074 | gene=IY08_25525 | protein=sodium:alanine symporter                      | protein_id=KGT40879.1 |
| gene | 4799106 | 4800536 | 122406 | 123836 | gene=IY08_25530 | protein=sodium:alanine symporter                      | protein_id=KGT40880.1 |
| gene | 4800841 | 4801479 | 124141 | 124779 | gene=IY08_25535 | protein=hypothetical protein                          | protein_id=KGT40881.1 |
| gene | 4801526 | 4804729 | 124826 | 128029 | gene=IY08_25540 | protein=peptidase M60                                 | protein_id=KGT40882.1 |
| gene | 4805301 | 4806221 | 128601 | 129521 | gene=IY08_25545 | protein=adhesin                                       | protein_id=KGT40883.1 |
| gene | 4806330 | 4807169 | 129630 | 130469 | gene=IY08_25550 | protein=glyoxal reductase                             | protein_id=KGT40884.1 |
| gene | 4807186 | 4808400 | 130486 | 131700 | gene=IY08_25555 | protein=MFS sugar transporter                         | protein_id=KGT40885.1 |
| gene | 4808743 | 4809087 | 132043 | 132387 | gene=IY08_25560 | protein=MarR family transcriptional regulator         | protein_id=KGT40886.1 |
| gene | 4809523 | 4809963 | 132823 | 133263 | gene=IY08_25565 | protein=hypothetical protein                          | protein_id=KGT40887.1 |
| gene | 4810008 | 4811186 | 133308 | 134486 | gene=IY08_25570 | protein=pyridine nucleotide-disulfide oxidoreductase  | protein_id=KGT40888.1 |
| gene | 4811495 | 4812754 | 134795 | 136054 | gene=IY08_25575 | protein=tyrosine--tRNA ligase                         | protein_id=KGT40889.1 |
| gene | 4813124 | 4814041 | 136424 | 137341 | gene=murB       | protein=UDP-N-acetylenolpyruvoylglucosamine reductase | protein_id=KGT40890.1 |
| gene | 4814424 | 4814819 | 137724 | 138119 | gene=IY08_25585 | protein=lysine methyltransferase                      | protein_id=KGT40891.1 |
| gene | 4815028 | 4816530 | 138328 | 139830 | gene=IY08_25590 | protein=chemotaxis protein                            | protein_id=KGT40892.1 |
| gene | 4816563 | 4817621 | 139863 | 140921 | gene=IY08_25595 | protein=endonuclease                                  | protein_id=KGT40893.1 |
| gene | 4817968 | 4818372 | 141268 | 141672 | gene=IY08_25600 | protein=camphor resistance protein CrcB               | protein_id=KGT40894.1 |

|      |         |         |        |        |                 |                                                        |                       |
|------|---------|---------|--------|--------|-----------------|--------------------------------------------------------|-----------------------|
| gene | 4818369 | 4818725 | 141669 | 142025 | gene=IY08_25605 | protein=camphor resistance protein CrcB                | protein_id=KGT40895.1 |
| gene | 4818755 | 4818994 | 142055 | 142294 | gene=IY08_25610 | protein=competence protein ComK                        | protein_id=KGT40896.1 |
| gene | 4819061 | 4819273 | 142361 | 142573 | gene=IY08_25615 | protein=hypothetical protein                           | protein_id=KGT40897.1 |
| gene | 4819415 | 4820608 | 142715 | 143908 | gene=IY08_25620 | protein=MFS transporter                                | protein_id=KGT40898.1 |
| gene | 4820614 | 4822161 | 143914 | 145461 | gene=IY08_25625 | protein=ABC transporter ATP-binding protein            | protein_id=KGT40899.1 |
| gene | 4822599 | 4823114 | 145899 | 146414 | gene=IY08_25630 | protein=spermidine acetyltransferase                   | protein_id=KGT40900.1 |
| gene | 4823388 | 4823864 | 146688 | 147164 | gene=IY08_25635 | protein=hypothetical protein                           | protein_id=KGT40901.1 |
| gene | 4823913 | 4824317 | 147213 | 147617 | gene=IY08_25640 | protein=protein PsiE-like protein                      | protein_id=KGT40902.1 |
| gene | 4824367 | 4825329 | 147667 | 148629 | pseudo          |                                                        |                       |
| gene | 4825791 | 4826756 | 149091 | 150056 | gene=IY08_25650 | protein=lipoprotein                                    | protein_id=KGT40903.1 |
| gene | 4826963 | 4828501 | 150263 | 151801 | gene=IY08_25655 | protein=alveolysin                                     | protein_id=KGT40904.1 |
| gene | 4828561 | 4828747 | 151861 | 152047 | pseudo          |                                                        |                       |
| gene | 4828951 | 4829703 | 152251 | 153003 | gene=IY08_25665 | protein=iron ABC transporter ATP-binding protein       | protein_id=KGT40905.1 |
| gene | 4829700 | 4830764 | 153000 | 154064 | gene=IY08_25670 | protein=iron ABC transporter permease                  | protein_id=KGT40906.1 |
| gene | 4830761 | 4831777 | 154061 | 155077 | gene=IY08_25675 | protein=iron ABC transporter permease                  | protein_id=KGT40907.1 |
| gene | 4831797 | 4832813 | 155097 | 156113 | gene=IY08_25680 | protein=iron ABC transporter substrate-binding protein | protein_id=KGT40908.1 |
| gene | 4833141 | 4833818 | 156441 | 157118 | gene=IY08_25685 | protein=transcriptional regulator                      | protein_id=KGT40909.1 |
| gene | 4834699 | 4835166 | 157999 | 158466 | gene=IY08_25690 | protein=single-stranded DNA-binding protein            | protein_id=KGT40910.1 |
| gene | 4835415 | 4837859 | 158715 | 161159 | gene=IY08_25695 | protein=ribonuclease R                                 | protein_id=KGT40911.1 |
| gene | 4838002 | 4838745 | 161302 | 162045 | gene=IY08_25700 | protein=carboxylesterase                               | protein_id=KGT40912.1 |
| gene | 4838904 | 4839137 | 162204 | 162437 | gene=IY08_25705 | protein=preprotein translocase subunit SecG            | protein_id=KGT40913.1 |
| gene | 4839232 | 4839924 | 162532 | 163224 | gene=IY08_25710 | protein=hypothetical protein                           | protein_id=KGT40914.1 |
| gene | 4839921 | 4840289 | 163221 | 163589 | gene=IY08_25715 | protein=holin-like protein                             | protein_id=KGT40915.1 |
| gene | 4840642 | 4841592 | 163942 | 164892 | gene=IY08_25720 | protein=nucleoside hydrolase                           | protein_id=KGT40916.1 |
| gene | 4841644 | 4842939 | 164944 | 166239 | gene=eno        | protein=enolase                                        | protein_id=KGT40917.1 |
| gene | 4842970 | 4844499 | 166270 | 167799 | gene=IY08_25730 | protein=phosphoglyceromutase                           | protein_id=KGT40918.1 |
| gene | 4844496 | 4845251 | 167796 | 168551 | gene=tpiA       | protein=triosephosphate isomerase                      | protein_id=KGT40919.1 |
| gene | 4845284 | 4846468 | 168584 | 169768 | gene=pgk        | protein=phosphoglycerate kinase                        | protein_id=KGT40920.1 |
| gene | 4846608 | 4847612 | 169908 | 170912 | gene=IY08_25745 | protein=glyceraldehyde-3-phosphate dehydrogenase       | protein_id=KGT40921.1 |
| gene | 4847639 | 4848667 | 170939 | 171967 | gene=IY08_25750 | protein=central glycolytic genes regulator             | protein_id=KGT40922.1 |
| gene | 4848803 | 4849048 | 172103 | 172348 | gene=IY08_25755 | protein=glutaredoxin                                   | protein_id=KGT40923.1 |

|      |         |         |        |        |                 |                                                         |                       |
|------|---------|---------|--------|--------|-----------------|---------------------------------------------------------|-----------------------|
| gene | 4849058 | 4850365 | 172358 | 173665 | gene=IY08_25760 | protein=RNA polymerase sigma54 factor                   | protein_id=KGT40924.1 |
| gene | 4852087 | 4852449 | 175387 | 175749 | gene=IY08_25775 | protein=hypothetical protein                            | protein_id=KGT40925.1 |
| gene | 4852465 | 4853070 | 175765 | 176370 | gene=IY08_25780 | protein=hypothetical protein                            | protein_id=KGT40926.1 |
| gene | 4853079 | 4853471 | 176379 | 176771 | gene=IY08_25785 | protein=hypothetical protein                            | protein_id=KGT40927.1 |
| gene | 4853471 | 4853737 | 176771 | 177037 | gene=IY08_25790 | protein=hypothetical protein                            | protein_id=KGT40928.1 |
| gene | 4854755 | 4854988 | 178055 | 178288 | gene=IY08_25795 | protein=hypothetical protein                            | protein_id=KGT40929.1 |
| gene | 4855393 | 4855656 | 178693 | 178956 | gene=IY08_25800 | protein=hypothetical protein                            | protein_id=KGT40930.1 |
| gene | 4856408 | 4856617 | 179708 | 179917 | gene=IY08_25805 | protein=hypothetical protein                            | protein_id=KGT40931.1 |
| gene | 4856729 | 4857001 | 180029 | 180301 | gene=IY08_25810 | protein=hypothetical protein                            | protein_id=KGT40932.1 |
| gene | 4857783 | 4858763 | 181083 | 182063 | gene=IY08_25815 | protein=DNA integration/recombination/inversion protein | protein_id=KGT40933.1 |
| gene | 4858993 | 4859068 | 182293 | 182368 | tRNA            |                                                         |                       |
| gene | 4859273 | 4859479 | 182573 | 182779 | gene=IY08_25825 | protein=hypothetical protein                            | protein_id=KGT40934.1 |
| gene | 4859573 | 4860061 | 182873 | 183361 | gene=IY08_25830 | protein=lipoprotein                                     | protein_id=KGT40935.1 |
| gene | 4860091 | 4860567 | 183391 | 183867 | gene=IY08_25835 | protein=stage V sporulation protein AC                  | protein_id=KGT40936.1 |
| gene | 4860568 | 4861584 | 183868 | 184884 | gene=IY08_25840 | protein=SpoVAD                                          | protein_id=KGT40937.1 |
| gene | 4861581 | 4861931 | 184881 | 185231 | gene=IY08_25845 | protein=stage V sporulation protein AEB                 | protein_id=KGT40938.1 |
| gene | 4861943 | 4862149 | 185243 | 185449 | gene=IY08_25850 | protein=NADH dehydrogenase                              | protein_id=KGT40939.1 |
| gene | 4862170 | 4863039 | 185470 | 186339 | gene=IY08_25855 | protein=membrane protein                                | protein_id=KGT40940.1 |
| gene | 4863280 | 4863861 | 186580 | 187161 | gene=IY08_25860 | protein=Clp protease                                    | protein_id=KGT40941.1 |
| gene | 4863984 | 4864164 | 187284 | 187464 | pseudo          |                                                         |                       |
| gene | 4864381 | 4864629 | 187681 | 187929 | gene=IY08_25870 | protein=phosphocarrier protein Chr                      | protein_id=KGT40942.1 |
| gene | 4864653 | 4865603 | 187953 | 188903 | gene=IY08_25875 | protein=sporulation regulator WhiA                      | protein_id=KGT40943.1 |
| gene | 4865692 | 4866645 | 188992 | 189945 | gene=IY08_25880 | protein=hypothetical protein                            | protein_id=KGT40944.1 |
| gene | 4866649 | 4867530 | 189949 | 190830 | gene=IY08_25885 | protein=glmZ(sRNA)-inactivating NTPase                  | protein_id=KGT40945.1 |
| gene | 4867551 | 4868009 | 190851 | 191309 | gene=IY08_25890 | protein=NUDIX hydrolase                                 | protein_id=KGT40946.1 |
| gene | 4868239 | 4869045 | 191539 | 192345 | gene=IY08_25895 | protein=membrane protein                                | protein_id=KGT40947.1 |
| gene | 4869211 | 4870167 | 192511 | 193467 | gene=IY08_25900 | protein=thioredoxin reductase                           | protein_id=KGT40948.1 |
| gene | 4870253 | 4871764 | 193553 | 195064 | gene=IY08_25905 | protein=TPR repeat-containing protein                   | protein_id=KGT40949.1 |
| gene | 4871904 | 4872416 | 195204 | 195716 | gene=IY08_25910 | protein=acetyltransferase                               | protein_id=KGT40950.1 |
| gene | 4872450 | 4873100 | 195750 | 196400 | gene=IY08_25915 | protein=pyrophosphatase                                 | protein_id=KGT40951.1 |
| gene | 4873168 | 4873980 | 196468 | 197280 | gene=IY08_25920 | protein=diacylglycerol transferase                      | protein_id=KGT40952.1 |



|      |         |         |        |        |                 |                                                       |                       |
|------|---------|---------|--------|--------|-----------------|-------------------------------------------------------|-----------------------|
| gene | 4874007 | 4874936 | 197307 | 198236 | gene=IY08_25925 | protein=serine kinase                                 | protein_id=KGT40953.1 |
| gene | 4875093 | 4875473 | 198393 | 198773 | gene=IY08_25930 | protein=membrane protein                              | protein_id=KGT40954.1 |
| gene | 4875589 | 4876038 | 198889 | 199338 | gene=IY08_25935 | protein=ATP synthase F1 subunit delta                 | protein_id=KGT40955.1 |
| gene | 4876098 | 4878974 | 199398 | 202274 | gene=IY08_25940 | protein=excinuclease ABC subunit A                    | protein_id=KGT40956.1 |
| gene | 4878980 | 4880956 | 202280 | 204256 | gene=IY08_25945 | protein=excinuclease ABC subunit B                    | protein_id=KGT40957.1 |
| gene | 4881107 | 4881538 | 204407 | 204838 | gene=IY08_25950 | protein=lipoprotein                                   | protein_id=KGT40958.1 |
| gene | 4881584 | 4882204 | 204884 | 205504 | gene=IY08_25955 | protein=membrane protein                              | protein_id=KGT40959.1 |
| gene | 4882201 | 4882962 | 205501 | 206262 | gene=IY08_25960 | protein=MerR family transcriptional regulator         | protein_id=KGT40960.1 |
| gene | 4883063 | 4883290 | 206363 | 206590 | gene=IY08_25965 | protein=membrane protein                              | protein_id=KGT40961.1 |
| gene | 4883438 | 4883635 | 206738 | 206935 | gene=IY08_25970 | protein=Cro/C1 family transcriptional regulator       | protein_id=KGT40962.1 |
| gene | 4883953 | 4884975 | 207253 | 208275 | gene=IY08_25975 | protein=membrane protein                              | protein_id=KGT40963.1 |
| gene | 4885127 | 4886020 | 208427 | 209320 | gene=IY08_25980 | protein=LysR family transcriptional regulator         | protein_id=KGT40964.1 |
| gene | 4886072 | 4886440 | 209372 | 209740 | gene=IY08_25985 | protein=MerR family transcriptional regulator         | protein_id=KGT40965.1 |
| gene | 4886445 | 4886984 | 209745 | 210284 | gene=IY08_25990 | protein=NAD(P)H-dependent oxidoreductase              | protein_id=KGT40966.1 |
| gene | 4887256 | 4888890 | 210556 | 212190 | gene=IY08_25995 | protein=ABC transporter ATP-binding protein           | protein_id=KGT40967.1 |
| gene | 4888991 | 4889302 | 212291 | 212602 | gene=IY08_26000 | protein=hypothetical protein                          | protein_id=KGT40968.1 |
| gene | 4889368 | 4891083 | 212668 | 214383 | gene=IY08_26005 | protein=multidrug ABC transporter ATP-binding protein | protein_id=KGT40969.1 |
| gene | 4891396 | 4892580 | 214696 | 215880 | gene=IY08_26010 | protein=membrane protein                              | protein_id=KGT40970.1 |
| gene | 4892690 | 4894174 | 215990 | 217474 | gene=IY08_26015 | protein=peptidase S41                                 | protein_id=KGT40971.1 |
| gene | 4894245 | 4895138 | 217545 | 218438 | gene=IY08_26020 | protein=cell division protein FtsX                    | protein_id=KGT40972.1 |
| gene | 4895128 | 4895772 | 218428 | 219072 | gene=IY08_26025 | protein=cell division protein FtsE                    | protein_id=KGT40973.1 |
| gene | 4896099 | 4896422 | 219399 | 219722 | gene=IY08_26030 | protein=cytochrome C'                                 | protein_id=KGT40974.1 |
| gene | 4896678 | 4896836 | 219978 | 220136 | gene=IY08_26035 | protein=hypothetical protein                          | protein_id=KGT40975.1 |
| gene | 4896863 | 4897843 | 220163 | 221143 | gene=IY08_26040 | protein=peptide chain release factor 2                | protein_id=KGT40976.1 |
| gene | 4898106 | 4900613 | 221406 | 223913 | gene=IY08_26050 | protein=preprotein translocase subunit SecA           | protein_id=KGT40977.1 |
| gene | 4901117 | 4901644 | 224417 | 224944 | gene=IY08_26055 | protein=hypothetical protein                          | protein_id=KGT40978.1 |
| gene | 4901686 | 4902324 | 224986 | 225624 | gene=IY08_26060 | protein=multidrug ABC transporter ATP-binding protein | protein_id=KGT40979.1 |
| gene | 4902328 | 4903092 | 225628 | 226392 | gene=IY08_26065 | protein=hypothetical protein                          | protein_id=KGT40980.1 |
| gene | 4903164 | 4903859 | 226464 | 227159 | gene=IY08_26070 | protein=hypothetical protein                          | protein_id=KGT40981.1 |
| gene | 4903846 | 4904634 | 227146 | 227934 | gene=IY08_26075 | protein=hypothetical protein                          | protein_id=KGT40982.1 |
| gene | 4904662 | 4905231 | 227962 | 228531 | gene=IY08_26080 | protein=hypothetical protein                          | protein_id=KGT40983.1 |

|      |         |         |        |        |                 |                                                       |                       |
|------|---------|---------|--------|--------|-----------------|-------------------------------------------------------|-----------------------|
| gene | 4905336 | 4905809 | 228636 | 229109 | gene=IY08_26085 | protein=hypothetical protein                          | protein_id=KGT40984.1 |
| gene | 4906214 | 4906756 | 229514 | 230056 | gene=IY08_26090 | protein=sigma-54 modulation protein                   | protein_id=KGT40985.1 |
| gene | 4907079 | 4907276 | 230379 | 230576 | gene=IY08_26095 | protein=cold-shock protein                            | protein_id=KGT40986.1 |
| gene | 4907403 | 4907975 | 230703 | 231275 | gene=IY08_26100 | protein=competence protein ComF                       | protein_id=KGT40987.1 |
| gene | 4908110 | 4909459 | 231410 | 232759 | gene=IY08_26105 | protein=competence protein ComF                       | protein_id=KGT40988.1 |
| gene | 4909587 | 4911014 | 232887 | 234314 | gene=IY08_26110 | protein=N-acetylmuramoyl-L-alanine amidase            | protein_id=KGT40989.1 |
| gene | 4911163 | 4911477 | 234463 | 234777 | gene=IY08_26115 | protein=HxIR family transcriptional regulator         | protein_id=KGT40990.1 |
| gene | 4911548 | 4911668 | 234848 | 234968 | pseudo          |                                                       |                       |
| gene | 4911649 | 4912491 | 234949 | 235791 | gene=IY08_26125 | protein=DegV domain-containing protein                | protein_id=KGT40991.1 |
| gene | 4913550 | 4914668 | 236850 | 237968 | gene=IY08_26135 | protein=LytR family transcriptional regulator         | protein_id=KGT40992.1 |
| gene | 4914706 | 4915821 | 238006 | 239121 | gene=IY08_26140 | protein=UDP-N-acetylglucosamine 2-epimerase           | protein_id=KGT40993.1 |
| gene | 4915896 | 4917221 | 239196 | 240521 | gene=IY08_26145 | protein=UDP-glucose 6-dehydrogenase                   | protein_id=KGT40994.1 |
| gene | 4917753 | 4918826 | 241053 | 242126 | gene=IY08_26150 | protein=glycosyl transferase                          | protein_id=KGT40995.1 |
| gene | 4919026 | 4919763 | 242326 | 243063 | gene=IY08_26155 | protein=peptidoglycan N-acetylglucosamine deacetylase | protein_id=KGT40996.1 |
| gene | 4919868 | 4922543 | 243168 | 245843 | gene=IY08_26160 | protein=transcription antiterminator BglG             | protein_id=KGT40997.1 |
| gene | 4923128 | 4923541 | 246428 | 246841 | gene=IY08_26180 | protein=hypothetical protein                          | protein_id=KGT40998.1 |
| gene | 4923730 | 4924911 | 247030 | 248211 | gene=IY08_26185 | protein=ChrA protein                                  | protein_id=KGT40999.1 |
| gene | 4924950 | 4925654 | 248250 | 248954 | gene=IY08_26190 | protein=hypothetical protein                          | protein_id=KGT41000.1 |
| gene | 4925704 | 4927029 | 249004 | 250329 | gene=IY08_26195 | protein=diacetylchitobiose-6-phosphate hydrolase      | protein_id=KGT41001.1 |
| gene | 4927033 | 4927356 | 250333 | 250656 | gene=IY08_26200 | protein=PTS cellobiose transporter subunit IIA        | protein_id=KGT41002.1 |
| gene | 4927538 | 4928845 | 250838 | 252145 | gene=IY08_26205 | protein=PTS lactose transporter subunit IIC           | protein_id=KGT41003.1 |
| gene | 4928862 | 4929164 | 252162 | 252464 | gene=IY08_26210 | protein=PTS chitobiose transporter subunit IIB        | protein_id=KGT41004.1 |
| gene | 4929511 | 4929828 | 252811 | 253128 | gene=IY08_26215 | protein=PTS cellobiose transporter subunit IIA        | protein_id=KGT41005.1 |
| gene | 4929838 | 4931139 | 253138 | 254439 | gene=IY08_26220 | protein=PTS cellobiose transporter subunit IIC        | protein_id=KGT41006.1 |
| gene | 4931154 | 4931456 | 254454 | 254756 | gene=IY08_26225 | protein=PTS chitobiose transporter subunit IIB        | protein_id=KGT41007.1 |
| gene | 4931680 | 4932897 | 254980 | 256197 | gene=IY08_26230 | protein=sodium:proton antiporter                      | protein_id=KGT41008.1 |
| gene | 4933046 | 4934203 | 256346 | 257503 | gene=IY08_26235 | protein=membrane protein                              | protein_id=KGT41009.1 |
| gene | 4934243 | 4934623 | 257543 | 257923 | gene=IY08_26240 | protein=glyoxalase                                    | protein_id=KGT41010.1 |
| gene | 4934664 | 4936664 | 257964 | 259964 | gene=IY08_26245 | protein=phage infection protein                       | protein_id=KGT41011.1 |
| gene | 4936799 | 4937683 | 260099 | 260983 | gene=IY08_26250 | protein=LysR family transcriptional regulator         | protein_id=KGT41012.1 |
| gene | 4937731 | 4938816 | 261031 | 262116 | gene=IY08_26255 | protein=transcriptional regulator                     | protein_id=KGT41013.1 |

|      |         |         |        |        |                 |                                                          |                       |
|------|---------|---------|--------|--------|-----------------|----------------------------------------------------------|-----------------------|
| gene | 4938908 | 4939057 | 262208 | 262357 | gene=IY08_26260 | protein=hypothetical protein                             | protein_id=KGT41014.1 |
| gene | 4939312 | 4940667 | 262612 | 263967 | gene=IY08_26265 | protein=cytochrome D ubiquinol oxidase subunit I         | protein_id=KGT41015.1 |
| gene | 4940660 | 4941685 | 263960 | 264985 | gene=IY08_26270 | protein=membrane protein                                 | protein_id=KGT41016.1 |
| gene | 4942156 | 4943514 | 265456 | 266814 | gene=IY08_26275 | protein=arsenic transporter                              | protein_id=KGT41017.1 |
| gene | 4943616 | 4945376 | 266916 | 268676 | gene=IY08_26280 | protein=thiamine biosynthesis protein ThiC               | protein_id=KGT41018.1 |
| gene | 4945676 | 4947337 | 268976 | 270637 | gene=IY08_26285 | protein=L-lactate permease                               | protein_id=KGT41019.1 |
| gene | 4947633 | 4947950 | 270933 | 271250 | gene=IY08_26290 | protein=hypothetical protein                             | protein_id=KGT41020.1 |
| gene | 4948022 | 4948513 | 271322 | 271813 | gene=IY08_26295 | protein=peptidase                                        | protein_id=KGT41021.1 |
| gene | 4948564 | 4948929 | 271864 | 272229 | gene=IY08_26300 | protein=hypothetical protein                             | protein_id=KGT41022.1 |
| gene | 4949476 | 4951404 | 272776 | 274704 | gene=IY08_26305 | protein=hypothetical protein                             | protein_id=KGT41023.1 |
| gene | 4952046 | 4952918 | 275346 | 276218 | gene=IY08_26315 | protein=D-amino acid aminotransferase                    | protein_id=KGT41024.1 |
| gene | 4953129 | 4954865 | 276429 | 278165 | gene=IY08_26325 | protein=peptidase M24                                    | protein_id=KGT41025.1 |
| gene | 4955233 | 4956444 | 278533 | 279744 | gene=IY08_26335 | protein=Na <sup>+</sup> dependent nucleoside transporter | protein_id=KGT41026.1 |
| gene | 4956706 | 4957461 | 280006 | 280761 | gene=IY08_26340 | protein=dGTP triphosphohydrolase                         | protein_id=KGT41027.1 |
| gene | 4957458 | 4958759 | 280758 | 282059 | gene=IY08_26345 | protein=N-acetylglucosaminyltransferase                  | protein_id=KGT41028.1 |
| gene | 4958906 | 4959040 | 282206 | 282340 | gene=IY08_26350 | protein=hypothetical protein                             | protein_id=KGT41029.1 |
| gene | 4959437 | 4960951 | 282737 | 284251 | gene=IY08_26355 | protein=glycine/betaine ABC transporter permease         | protein_id=KGT41030.1 |
| gene | 4961616 | 4962494 | 284916 | 285794 | gene=IY08_26360 | protein=enterotoxin                                      | protein_id=KGT41031.1 |
| gene | 4962576 | 4962878 | 285876 | 286178 | gene=IY08_26365 | protein=hypothetical protein                             | protein_id=KGT41032.1 |
| gene | 4963009 | 4964373 | 286309 | 287673 | gene=IY08_26370 | protein=membrane protein                                 | protein_id=KGT41033.1 |
| gene | 4964386 | 4965936 | 287686 | 289236 | gene=IY08_26375 | protein=membrane protein                                 | protein_id=KGT41034.1 |
| gene | 4965942 | 4966433 | 289242 | 289733 | gene=IY08_26380 | protein=hypothetical protein                             | protein_id=KGT41035.1 |
| gene | 4966592 | 4968211 | 289892 | 291511 | gene=IY08_26385 | protein=hypothetical protein                             | protein_id=KGT41036.1 |
| gene | 4968195 | 4970951 | 291495 | 294251 | gene=IY08_26390 | protein=ATP-dependent helicase                           | protein_id=KGT41037.1 |
| gene | 4971024 | 4971509 | 294324 | 294809 | gene=IY08_26395 | protein=hypothetical protein                             | protein_id=KGT41038.1 |
| gene | 4971621 | 4971845 | 294921 | 295145 | gene=IY08_26400 | protein=hypothetical protein                             | protein_id=KGT41039.1 |
| gene | 4971962 | 4972177 | 295262 | 295477 | gene=IY08_26405 | protein=potassium channel protein                        | protein_id=KGT41040.1 |
| gene | 4972199 | 4972597 | 295499 | 295897 | gene=IY08_26410 | protein=hypothetical protein                             | protein_id=KGT41041.1 |
| gene | 4972788 | 4973264 | 296088 | 296564 | gene=IY08_26415 | protein=competence protein                               | protein_id=KGT41042.1 |
| gene | 4973319 | 4973789 | 296619 | 297089 | gene=IY08_26420 | protein=RNA polymerase factor sigma-70                   | protein_id=KGT41043.1 |
| gene | 4974010 | 4974690 | 297310 | 297990 | gene=IY08_26425 | protein=membrane protein                                 | protein_id=KGT41044.1 |

|      |         |         |        |        |                 |                                                       |                       |
|------|---------|---------|--------|--------|-----------------|-------------------------------------------------------|-----------------------|
| gene | 4974804 | 4976006 | 298104 | 299306 | gene=IY08_26430 | protein=macrolide ABC transporter permease            | protein_id=KGT41045.1 |
| gene | 4976003 | 4976683 | 299303 | 299983 | gene=IY08_26435 | protein=macrolide ABC transporter ATP-binding protein | protein_id=KGT41046.1 |
| gene | 4976680 | 4977873 | 299980 | 301173 | gene=IY08_26440 | protein=RND transporter MFP subunit                   | protein_id=KGT41047.1 |
| gene | 4978112 | 4979446 | 301412 | 302746 | gene=IY08_26445 | protein=MFS transporter                               | protein_id=KGT41048.1 |
| gene | 4979466 | 4980500 | 302766 | 303800 | gene=IY08_26450 | protein=ABC transporter substrate-binding protein     | protein_id=KGT41049.1 |
| gene | 4980497 | 4981279 | 303797 | 304579 | gene=IY08_26455 | protein=homoserine dehydrogenase                      | protein_id=KGT41050.1 |
| gene | 4981346 | 4982776 | 304646 | 306076 | gene=IY08_26460 | protein=histidine kinase                              | protein_id=KGT41051.1 |
| gene | 4982788 | 4983459 | 306088 | 306759 | gene=IY08_26465 | protein=XRE family transcriptional regulator          | protein_id=KGT41052.1 |
| gene | 4983580 | 4984572 | 306880 | 307872 | gene=IY08_26470 | protein=UDP-glucose 4-epimerase                       | protein_id=KGT41053.1 |
| gene | 4984656 | 4985486 | 307956 | 308786 | gene=IY08_26475 | protein=EPSX protein                                  | protein_id=KGT41054.1 |
| gene | 4985585 | 4986493 | 308885 | 309793 | gene=IY08_26480 | protein=membrane-bound transcriptional regulator LytR | protein_id=KGT41055.1 |
| gene | 4986621 | 4987646 | 309921 | 310946 | gene=IY08_26485 | protein=NAD-dependent epimerase                       | protein_id=KGT41056.1 |
| gene | 4987624 | 4988994 | 310924 | 312294 | gene=IY08_26490 | protein=UDP-glucose 6-dehydrogenase                   | protein_id=KGT41057.1 |
| gene | 4989212 | 4990672 | 312512 | 313972 | gene=IY08_26495 | protein=polysaccharide biosynthesis protein           | protein_id=KGT41058.1 |
| gene | 4990685 | 4991818 | 313985 | 315118 | gene=IY08_26500 | protein=poly-gamma-glutamate biosynthesis protein     | protein_id=KGT41059.1 |
| gene | 4991849 | 4992772 | 315149 | 316072 | gene=IY08_26505 | protein=glycosyl transferase                          | protein_id=KGT41060.1 |
| gene | 4992819 | 4994075 | 316119 | 317375 | gene=IY08_26510 | protein=hypothetical protein                          | protein_id=KGT41061.1 |
| gene | 4994284 | 4995375 | 317584 | 318675 | gene=IY08_26515 | protein=hypothetical protein                          | protein_id=KGT41062.1 |
| gene | 4995494 | 4996552 | 318794 | 319852 | gene=IY08_26520 | protein=hypothetical protein                          | protein_id=KGT41063.1 |
| gene | 4996566 | 4997036 | 319866 | 320336 | gene=IY08_26525 | protein=hypothetical protein                          | protein_id=KGT41064.1 |
| gene | 4997087 | 4997911 | 320387 | 321211 | gene=IY08_26530 | protein=glycosyl transferase                          | protein_id=KGT41065.1 |
| gene | 4998027 | 4998731 | 321327 | 322031 | gene=IY08_26535 | protein=glycosyl transferase                          | protein_id=KGT41066.1 |
| gene | 4998757 | 4999980 | 322057 | 323280 | gene=IY08_26540 | protein=capsular biosynthesis protein                 | protein_id=KGT41067.1 |
| gene | 5000077 | 5001888 | 323377 | 325188 | gene=IY08_26545 | protein=polysaccharide biosynthesis protein EpsC      | protein_id=KGT41068.1 |
| gene | 5001949 | 5002830 | 325249 | 326130 | gene=IY08_26550 | protein=UTP--glucose-1-phosphate uridylyltransferase  | protein_id=KGT41069.1 |
| gene | 5003077 | 5003844 | 326377 | 327144 | gene=IY08_26555 | protein=tyrosine protein phosphatase                  | protein_id=KGT41070.1 |
| gene | 5003956 | 5004657 | 327256 | 327957 | gene=IY08_26560 | protein=tyrosine protein kinase                       | protein_id=KGT41071.1 |
| gene | 5004647 | 5005393 | 327947 | 328693 | gene=IY08_26565 | protein=capsular biosynthesis protein                 | protein_id=KGT41072.1 |
| gene | 5005654 | 5006331 | 328954 | 329631 | gene=IY08_26570 | protein=tyrosine protein kinase                       | protein_id=KGT41073.1 |
| gene | 5006677 | 5007111 | 329977 | 330411 | gene=IY08_26575 | protein=3-hydroxyacyl-ACP dehydratase                 | protein_id=KGT41074.1 |
| gene | 5007539 | 5008540 | 330839 | 331840 | gene=IY08_26580 | protein=rod shape-determining protein MreB            | protein_id=KGT41075.1 |

|      |         |         |        |        |                 |                                                        |                       |
|------|---------|---------|--------|--------|-----------------|--------------------------------------------------------|-----------------------|
| gene | 5008701 | 5008973 | 332001 | 332273 | gene=IY08_26585 | protein=stage III sporulation protein D                | protein_id=KGT41076.1 |
| gene | 5009282 | 5009416 | 332582 | 332716 | gene=IY08_26590 | protein=ABC transporter ATP-binding protein            | protein_id=KGT41077.1 |
| gene | 5009558 | 5010463 | 332858 | 333763 | gene=IY08_26595 | protein=peptidase M23                                  | protein_id=KGT41078.1 |
| gene | 5010625 | 5011329 | 333925 | 334629 | gene=IY08_26600 | protein=ABC transporter permease                       | protein_id=KGT41079.1 |
| gene | 5011329 | 5012171 | 334629 | 335471 | gene=IY08_26605 | protein=bacitracin ABC transporter ATP-binding protein | protein_id=KGT41080.1 |
| gene | 5012352 | 5013359 | 335652 | 336659 | gene=IY08_26610 | protein=transcriptional regulator                      | protein_id=KGT41081.1 |
| gene | 5013460 | 5014479 | 336760 | 337779 | gene=IY08_26615 | protein=stage II sporulation protein D                 | protein_id=KGT41082.1 |
| gene | 5014686 | 5015990 | 337986 | 339290 | gene=IY08_26620 | protein=UDP-N-acetylglucosamine 1-                     | protein_id=KGT41083.1 |
| gene | 5016030 | 5016740 | 339330 | 340040 | gene=IY08_26625 | protein=membrane protein                               | protein_id=KGT41084.1 |
| gene | 5016786 | 5017022 | 340086 | 340322 | gene=IY08_26630 | protein=membrane protein                               | protein_id=KGT41085.1 |
| gene | 5017225 | 5018739 | 340525 | 342039 | gene=IY08_26635 | protein=NADH:ubiquinone oxidoreductase subunit N       | protein_id=KGT41086.1 |
| gene | 5018747 | 5020249 | 342047 | 343549 | gene=IY08_26640 | protein=NADH:ubiquinone oxidoreductase subunit M       | protein_id=KGT41087.1 |
| gene | 5020246 | 5022108 | 343546 | 345408 | gene=IY08_26645 | protein=NADH:ubiquinone oxidoreductase subunit L       | protein_id=KGT41088.1 |
| gene | 5022139 | 5022453 | 345439 | 345753 | gene=IY08_26650 | protein=NADH dehydrogenase                             | protein_id=KGT41089.1 |
| gene | 5022446 | 5022970 | 345746 | 346270 | gene=IY08_26655 | protein=NADH:ubiquinone oxidoreductase subunit J       | protein_id=KGT41090.1 |
| gene | 5022967 | 5023386 | 346267 | 346686 | gene=IY08_26660 | protein=NADH dehydrogenase                             | protein_id=KGT41091.1 |
| gene | 5023412 | 5024413 | 346712 | 347713 | gene=IY08_26665 | protein=NADH:ubiquinone oxidoreductase subunit H       | protein_id=KGT41092.1 |
| gene | 5024413 | 5025513 | 347713 | 348813 | gene=IY08_26670 | protein=NADH dehydrogenase                             | protein_id=KGT41093.1 |
| gene | 5025516 | 5026754 | 348816 | 350054 | gene=IY08_26675 | protein=NADH dehydrogenase                             | protein_id=KGT41094.1 |
| gene | 5026751 | 5027269 | 350051 | 350569 | gene=IY08_26680 | protein=NADH dehydrogenase                             | protein_id=KGT41095.1 |
| gene | 5027260 | 5027628 | 350560 | 350928 | gene=IY08_26685 | protein=NADH:ubiquinone oxidoreductase subunit A       | protein_id=KGT41096.1 |
| gene | 5027883 | 5030612 | 351183 | 353912 | gene=IY08_26690 | protein=diguanylate cyclase                            | protein_id=KGT41097.1 |
| gene | 5030636 | 5031280 | 353936 | 354580 | gene=IY08_26695 | protein=membrane protein                               | protein_id=KGT41098.1 |
| gene | 5031330 | 5032115 | 354630 | 355415 | gene=IY08_26700 | protein=membrane protein                               | protein_id=KGT41099.1 |
| gene | 5032253 | 5032654 | 355553 | 355954 | gene=IY08_26705 | protein=ATP synthase F0F1 subunit epsilon              | protein_id=KGT41100.1 |
| gene | 5032675 | 5034081 | 355975 | 357381 | gene=IY08_26710 | protein=ATP F0F1 synthase subunit beta                 | protein_id=KGT41101.1 |
| gene | 5034201 | 5035061 | 357501 | 358361 | gene=IY08_26715 | protein=ATP synthase F0F1 subunit gamma                | protein_id=KGT41102.1 |
| gene | 5035398 | 5036906 | 358698 | 360206 | gene=IY08_26720 | protein=ATP F0F1 synthase subunit alpha                | protein_id=KGT41103.1 |
| gene | 5036918 | 5037460 | 360218 | 360760 | gene=IY08_26725 | protein=ATP synthase F0F1 subunit delta                | protein_id=KGT41104.1 |
| gene | 5037457 | 5037963 | 360757 | 361263 | gene=IY08_26730 | protein=ATP F0F1 synthase subunit B                    | protein_id=KGT41105.1 |
| gene | 5038093 | 5038311 | 361393 | 361611 | gene=IY08_26735 | protein=ATP synthase F0F1 subunit C                    | protein_id=KGT41106.1 |

|      |         |         |        |        |                 |                                                      |                       |
|------|---------|---------|--------|--------|-----------------|------------------------------------------------------|-----------------------|
| gene | 5038368 | 5039087 | 361668 | 362387 | gene=IY08_26740 | protein=ATP synthase subunit A                       | protein_id=KGT41107.1 |
| gene | 5039095 | 5039487 | 362395 | 362787 | gene=IY08_26745 | protein=ATP synthase subunit I                       | protein_id=KGT41108.1 |
| gene | 5039487 | 5039711 | 362787 | 363011 | gene=IY08_26750 | protein=membrane protein                             | protein_id=KGT41109.1 |
| gene | 5039738 | 5039851 | 363038 | 363151 | gene=IY08_26755 | protein=histidine kinase                             | protein_id=KGT41110.1 |
| gene | 5040231 | 5040860 | 363531 | 364160 | gene=upp        | protein=uracil phosphoribosyltransferase             | protein_id=KGT41111.1 |
| gene | 5041133 | 5042374 | 364433 | 365674 | gene=IY08_26765 | protein=serine hydroxymethyltransferase              | protein_id=KGT41112.1 |
| gene | 5042628 | 5043200 | 365928 | 366500 | gene=IY08_26770 | protein=hypothetical protein                         | protein_id=KGT41113.1 |
| gene | 5043267 | 5043710 | 366567 | 367010 | gene=IY08_26775 | protein=ribose 5-phosphate isomerase                 | protein_id=KGT41114.1 |
| gene | 5043808 | 5044248 | 367108 | 367548 | gene=IY08_26780 | protein=protein tyrosine phosphatase                 | protein_id=KGT41115.1 |
| gene | 5044490 | 5044987 | 367790 | 368287 | gene=IY08_26785 | protein=PTS glucose transporter subunit IIA          | protein_id=KGT41116.1 |
| gene | 5045375 | 5045761 | 368675 | 369061 | gene=IY08_26790 | protein=oxidoreductase                               | protein_id=KGT41117.1 |
| gene | 5045921 | 5046532 | 369221 | 369832 | gene=IY08_26795 | protein=hypothetical protein                         | protein_id=KGT41118.1 |
| gene | 5046652 | 5046851 | 369952 | 370151 | pseudo          |                                                      |                       |
| gene | 5046848 | 5047126 | 370148 | 370426 | gene=IY08_26805 | protein=hypothetical protein                         | protein_id=KGT41119.1 |
| gene | 5047357 | 5047905 | 370657 | 371205 | gene=IY08_26815 | protein=membrane protein                             | protein_id=KGT41120.1 |
| gene | 5047983 | 5049023 | 371283 | 372323 | gene=IY08_26820 | protein=tRNA threonylcarbamoyladenosine biosynthesis | protein_id=KGT41121.1 |
| gene | 5049132 | 5049590 | 372432 | 372890 | gene=IY08_26825 | protein=mechanosensitive ion channel protein         | protein_id=KGT41122.1 |
| gene | 5049640 | 5050503 | 372940 | 373803 | gene=IY08_26830 | protein=stage II sporulation protein R               | protein_id=KGT41123.1 |
| gene | 5050616 | 5051467 | 373916 | 374767 | gene=IY08_26835 | protein=SAM-dependent methyltransferase              | protein_id=KGT41124.1 |
| gene | 5051467 | 5052534 | 374767 | 375834 | gene=IY08_26840 | protein=peptide chain release factor 1               | protein_id=KGT41125.1 |
| gene | 5052926 | 5053513 | 376226 | 376813 | gene=IY08_26845 | protein=thymidine kinase                             | protein_id=KGT41126.1 |
| gene | 5053622 | 5053867 | 376922 | 377167 | gene=rpmE2      | protein=50S ribosomal protein L31 type B             | protein_id=KGT41127.1 |
| gene | 5054393 | 5055664 | 377693 | 378964 | gene=IY08_26855 | protein=transcription termination factor Rho         | protein_id=KGT41128.1 |
| gene | 5056059 | 5057024 | 379359 | 380324 | gene=glpX       | protein=fructose 1,6-bisphosphatase                  | protein_id=KGT41129.1 |
| gene | 5057141 | 5058430 | 380441 | 381730 | gene=IY08_26875 | protein=UDP-N-acetylglucosamine 1-                   | protein_id=KGT41130.1 |
| gene | 5058762 | 5059619 | 382062 | 382919 | gene=IY08_26880 | protein=fructose-bisphosphate aldolase               | protein_id=KGT41131.1 |
| gene | 5059830 | 5060198 | 383130 | 383498 | gene=IY08_26885 | protein=chemotaxis protein CheY                      | protein_id=KGT41132.1 |
| gene | 5060400 | 5060924 | 383700 | 384224 | gene=IY08_26890 | protein=hypothetical protein                         | protein_id=KGT41133.1 |
| gene | 5060956 | 5062563 | 384256 | 385863 | gene=IY08_26895 | protein=CTP synthetase                               | protein_id=KGT41134.1 |
| gene | 5062821 | 5063351 | 386121 | 386651 | gene=IY08_26900 | protein=DNA-directed RNA polymerase subunit delta    | protein_id=KGT41135.1 |
| gene | 5063507 | 5064136 | 386807 | 387436 | gene=IY08_26905 | protein=TetR family transcriptional regulator        | protein_id=KGT41136.1 |

|      |         |         |        |        |                 |                                                 |                       |
|------|---------|---------|--------|--------|-----------------|-------------------------------------------------|-----------------------|
| gene | 5064203 | 5065342 | 387503 | 388642 | gene=IY08_26910 | protein=acyl-CoA dehydrogenase                  | protein_id=KGT41137.1 |
| gene | 5065364 | 5066494 | 388664 | 389794 | gene=IY08_26915 | protein=acyl-CoA dehydrogenase                  | protein_id=KGT41138.1 |
| gene | 5066568 | 5067419 | 389868 | 390719 | gene=IY08_26920 | protein=3-hydroxybutyryl-CoA dehydrogenase      | protein_id=KGT41139.1 |
| gene | 5067469 | 5068650 | 390769 | 391950 | gene=IY08_26925 | protein=acetyl-CoA acetyltransferase            | protein_id=KGT41140.1 |
| gene | 5068762 | 5070873 | 392062 | 394173 | gene=IY08_26930 | protein=hypothetical protein                    | protein_id=KGT41141.1 |
| gene | 5071319 | 5072512 | 394619 | 395812 | gene=IY08_26935 | protein=cardiolipin synthetase                  | protein_id=KGT41142.1 |
| gene | 5072545 | 5073498 | 395845 | 396798 | gene=uvrE       | protein=UV damage repair endonuclease UvrE      | protein_id=KGT41143.1 |
| gene | 5073625 | 5076303 | 396925 | 399603 | gene=IY08_26945 | protein=diguanylate cyclase                     | protein_id=KGT41144.1 |
| gene | 5076320 | 5076466 | 399620 | 399766 | gene=IY08_26950 | protein=PapR                                    | protein_id=KGT41145.1 |
| gene | 5076556 | 5077413 | 399856 | 400713 | gene=IY08_26955 | protein=transcriptional regulator               | protein_id=KGT41146.1 |
| gene | 5077582 | 5079333 | 400882 | 402633 | gene=IY08_26960 | protein=bacillolysin                            | protein_id=KGT41147.1 |
| gene | 5079373 | 5079975 | 402673 | 403275 | gene=IY08_26965 | protein=transcriptional regulator               | protein_id=KGT41148.1 |
| gene | 5079972 | 5081102 | 403272 | 404402 | gene=IY08_26970 | protein=histidine kinase                        | protein_id=KGT41149.1 |
| gene | 5081103 | 5081837 | 404403 | 405137 | gene=IY08_26975 | protein=ABC transporter permease                | protein_id=KGT41150.1 |
| gene | 5081834 | 5082736 | 405134 | 406036 | gene=IY08_26980 | protein=ABC transporter ATP-binding protein     | protein_id=KGT41151.1 |
| gene | 5082942 | 5083688 | 406242 | 406988 | gene=IY08_26985 | protein=methionine aminopeptidase               | protein_id=KGT41152.1 |
| gene | 5084449 | 5093103 | 407749 | 416403 | gene=IY08_26990 | protein=collagen-binding protein                | protein_id=KGT41153.1 |
| gene | 5093596 | 5094996 | 416896 | 418296 | gene=IY08_26995 | protein=aminopeptidase                          | protein_id=KGT41154.1 |
| gene | 5095143 | 5095517 | 418443 | 418817 | gene=IY08_27000 | protein=hypothetical protein                    | protein_id=KGT41155.1 |
| gene | 5095544 | 5096215 | 418844 | 419515 | gene=IY08_27005 | protein=ECF-type sigma factor negative effector | protein_id=KGT41156.1 |
| gene | 5096199 | 5096513 | 419499 | 419813 | gene=IY08_27010 | protein=ECF-type sigma factor negative effector | protein_id=KGT41157.1 |
| gene | 5096500 | 5097026 | 419800 | 420326 | pseudo          |                                                 |                       |
| gene | 5097417 | 5099087 | 420717 | 422387 | gene=argS       | protein=arginine--tRNA ligase                   | protein_id=KGT41158.1 |
| gene | 5099087 | 5099524 | 422387 | 422824 | gene=IY08_27025 | protein=hypothetical protein                    | protein_id=KGT41159.1 |
| gene | 5099727 | 5100713 | 423027 | 424013 | gene=IY08_27030 | protein=peptidase S66                           | protein_id=KGT41160.1 |
| gene | 5100738 | 5101100 | 424038 | 424400 | gene=IY08_27035 | protein=hypothetical protein                    | protein_id=KGT41161.1 |
| gene | 5101333 | 5102370 | 424633 | 425670 | gene=IY08_27040 | protein=transcriptional regulator               | protein_id=KGT41162.1 |
| gene | 5102757 | 5103629 | 426057 | 426929 | gene=IY08_27045 | protein=agmatinase                              | protein_id=KGT41163.1 |
| gene | 5103848 | 5104675 | 427148 | 427975 | gene=IY08_27050 | protein=spermidine synthase                     | protein_id=KGT41164.1 |
| gene | 5104840 | 5106003 | 428140 | 429303 | gene=IY08_27055 | protein=major facilitator transporter           | protein_id=KGT41165.1 |
| gene | 5106009 | 5106416 | 429309 | 429716 | gene=IY08_27060 | protein=MerR family transcriptional regulator   | protein_id=KGT41166.1 |

|      |         |         |        |        |                 |                                                       |                       |
|------|---------|---------|--------|--------|-----------------|-------------------------------------------------------|-----------------------|
| gene | 5106569 | 5107294 | 429869 | 430594 | gene=IY08_27070 | protein=hypothetical protein                          | protein_id=KGT41167.1 |
| gene | 5107396 | 5109447 | 430696 | 432747 | gene=IY08_27075 | protein=penicillin-binding protein                    | protein_id=KGT41168.1 |
| gene | 5109482 | 5109991 | 432782 | 433291 | gene=IY08_27080 | protein=hypothetical protein                          | protein_id=KGT41169.1 |
| gene | 5110017 | 5110691 | 433317 | 433991 | gene=IY08_27085 | protein=zinc metalloprotease                          | protein_id=KGT41170.1 |
| gene | 5110804 | 5110989 | 434104 | 434289 | gene=IY08_27090 | protein=4-oxalocrotonate tautomerase                  | protein_id=KGT41171.1 |
| gene | 5111029 | 5112333 | 434329 | 435633 | gene=IY08_27095 | protein=hypothetical protein                          | protein_id=KGT41172.1 |
| gene | 5112479 | 5113417 | 435779 | 436717 | gene=IY08_27100 | protein=ferrichrome ABC transporter substrate-binding | protein_id=KGT41173.1 |
| gene | 5113608 | 5114420 | 436908 | 437720 | gene=IY08_27105 | protein=iron ABC transporter ATP-binding protein      | protein_id=KGT41174.1 |
| gene | 5114436 | 5115452 | 437736 | 438752 | gene=IY08_27110 | protein=iron ABC transporter permease                 | protein_id=KGT41175.1 |
| gene | 5115449 | 5116504 | 438749 | 439804 | gene=IY08_27115 | protein=ferrichrome ABC transporter permease          | protein_id=KGT41176.1 |
| gene | 5116816 | 5117040 | 440116 | 440340 | gene=IY08_27120 | protein=hypothetical protein                          | protein_id=KGT41177.1 |
| gene | 5117326 | 5118018 | 440626 | 441318 | gene=IY08_27125 | protein=transcriptional regulator                     | protein_id=KGT41178.1 |
| gene | 5118147 | 5118992 | 441447 | 442292 | gene=IY08_27130 | protein=octanoyltransferase                           | protein_id=KGT41179.1 |
| gene | 5119041 | 5120012 | 442341 | 443312 | gene=eutD       | protein=phosphotransacetylase                         | protein_id=KGT41180.1 |
| gene | 5120268 | 5121011 | 443568 | 444311 | gene=IY08_27140 | protein=heme peroxidase                               | protein_id=KGT41181.1 |
| gene | 5121211 | 5122482 | 444511 | 445782 | gene=IY08_27145 | protein=D-alanyl-D-alanine carboxypeptidase           | protein_id=KGT41182.1 |
| gene | 5122656 | 5123078 | 445956 | 446378 | gene=IY08_27150 | protein=cell wall hydrolase                           | protein_id=KGT41183.1 |
| gene | 5123106 | 5123534 | 446406 | 446834 | gene=IY08_27155 | protein=spore germination protein GerQ                | protein_id=KGT41184.1 |
| gene | 5123566 | 5123934 | 446866 | 447234 | gene=IY08_27160 | protein=membrane protein                              | protein_id=KGT41185.1 |
| gene | 5123999 | 5124286 | 447299 | 447586 | gene=IY08_27165 | protein=hypothetical protein                          | protein_id=KGT41186.1 |
| gene | 5124293 | 5125285 | 447593 | 448585 | gene=IY08_27170 | protein=potassium channel protein                     | protein_id=KGT41187.1 |
| gene | 5125381 | 5126664 | 448681 | 449964 | gene=IY08_27175 | protein=purine permease                               | protein_id=KGT41188.1 |
| gene | 5126893 | 5127714 | 450193 | 451014 | gene=IY08_27180 | protein=haloacid dehalogenase                         | protein_id=KGT41189.1 |
| gene | 5127924 | 5128217 | 451224 | 451517 | gene=IY08_27185 | protein=membrane protein                              | protein_id=KGT41190.1 |
| gene | 5128259 | 5128936 | 451559 | 452236 | gene=IY08_27190 | protein=uracil-DNA glycosylase                        | protein_id=KGT41191.1 |
| gene | 5128956 | 5129948 | 452256 | 453248 | gene=IY08_27195 | protein=ABC transporter permease                      | protein_id=KGT41192.1 |
| gene | 5129941 | 5130858 | 453241 | 454158 | gene=IY08_27200 | protein=ABC transporter ATP-binding protein           | protein_id=KGT41193.1 |
| gene | 5130855 | 5131664 | 454155 | 454964 | gene=IY08_27205 | protein=lipase                                        | protein_id=KGT41194.1 |
| gene | 5131747 | 5132724 | 455047 | 456024 | gene=IY08_27210 | protein=LacI family transcriptional regulator         | protein_id=KGT41195.1 |
| gene | 5132822 | 5133448 | 456122 | 456748 | gene=IY08_27215 | protein=membrane protein                              | protein_id=KGT41196.1 |
| gene | 5133478 | 5134773 | 456778 | 458073 | gene=IY08_27220 | protein=homoserine dehydrogenase                      | protein_id=KGT41197.1 |



|      |         |         |        |        |                 |                                                                                |                       |
|------|---------|---------|--------|--------|-----------------|--------------------------------------------------------------------------------|-----------------------|
| gene | 5134915 | 5135820 | 458215 | 459120 | gene=IY08_27225 | protein=homoserine O-succinyltransferase                                       | protein_id=KGT41198.1 |
| gene | 5135804 | 5137102 | 459104 | 460402 | gene=IY08_27230 | protein=O-acetylhomoserine                                                     | protein_id=KGT41199.1 |
| gene | 5137620 | 5138849 | 460920 | 462149 | gene=IY08_27235 | protein=chloride channel protein                                               | protein_id=KGT41200.1 |
| gene | 5138895 | 5139590 | 462195 | 462890 | gene=IY08_27240 | protein=HAD family hydrolase                                                   | protein_id=KGT41201.1 |
| gene | 5139698 | 5140369 | 462998 | 463669 | gene=IY08_27245 | protein=XRE family transcriptional regulator                                   | protein_id=KGT41202.1 |
| gene | 5140430 | 5141056 | 463730 | 464356 | gene=IY08_27250 | protein=FMN-dependent NADH-azoreductase                                        | protein_id=KGT41203.1 |
| gene | 5141248 | 5141895 | 464548 | 465195 | gene=IY08_27255 | protein=LuxR family transcriptional regulator                                  | protein_id=KGT41204.1 |
| gene | 5141916 | 5143487 | 465216 | 466787 | gene=IY08_27260 | protein=histidine kinase                                                       | protein_id=KGT41205.1 |
| gene | 5143622 | 5144446 | 466922 | 467746 | gene=IY08_27265 | protein=pyridoxal kinase                                                       | protein_id=KGT41206.1 |
| gene | 5144533 | 5145591 | 467833 | 468891 | gene=IY08_27270 | protein=diguanylate cyclase                                                    | protein_id=KGT41207.1 |
| gene | 5145737 | 5145940 | 469037 | 469240 | gene=IY08_27275 | protein=cytosolic protein                                                      | protein_id=KGT41208.1 |
| gene | 5145933 | 5148008 | 469233 | 471308 | gene=IY08_27280 | protein=carbon starvation protein A                                            | protein_id=KGT41209.1 |
| gene | 5148131 | 5148847 | 471431 | 472147 | gene=IY08_27285 | protein=chemotaxis protein CheY                                                | protein_id=KGT41210.1 |
| gene | 5149066 | 5150265 | 472366 | 473565 | gene=IY08_27290 | protein=major facilitator transporter                                          | protein_id=KGT41211.1 |
| gene | 5150480 | 5151220 | 473780 | 474520 | gene=IY08_27295 | protein=acetylglucosaminyl diphospho-UDP acetyl-beta-D-mannosaminyltransferase | protein_id=KGT41212.1 |
| gene | 5151242 | 5152351 | 474542 | 475651 | gene=IY08_27300 | protein=glycosyl transferase                                                   | protein_id=KGT41213.1 |
| gene | 5152447 | 5153919 | 475747 | 477219 | gene=IY08_27305 | protein=hypothetical protein                                                   | protein_id=KGT41214.1 |
| gene | 5154384 | 5155016 | 477684 | 478316 | gene=IY08_27310 | protein=membrane protein                                                       | protein_id=KGT41215.1 |
| gene | 5155151 | 5156452 | 478451 | 479752 | gene=IY08_27315 | protein=chemotaxis protein                                                     | protein_id=KGT41216.1 |
| gene | 5156543 | 5157856 | 479843 | 481156 | gene=IY08_27320 | protein=membrane protein                                                       | protein_id=KGT41217.1 |
| gene | 5158155 | 5158667 | 481455 | 481967 | gene=IY08_27325 | protein=acyl-CoA thioester hydrolase                                           | protein_id=KGT41218.1 |
| gene | 5158863 | 5159306 | 482163 | 482606 | gene=IY08_27330 | protein=hypothetical protein                                                   | protein_id=KGT41219.1 |
| gene | 5159532 | 5160512 | 482832 | 483812 | gene=IY08_27335 | protein=beta-1,3-N-acetylglucosaminyltransferase                               | protein_id=KGT41220.1 |
| gene | 5160610 | 5162025 | 483910 | 485325 | gene=IY08_27340 | protein=sugar translocase                                                      | protein_id=KGT41221.1 |
| gene | 5162374 | 5165052 | 485674 | 488352 | gene=IY08_27345 | protein=multidrug transporter                                                  | protein_id=KGT41222.1 |
| gene | 5165136 | 5166074 | 488436 | 489374 | gene=IY08_27350 | protein=glycosyltransferase                                                    | protein_id=KGT41223.1 |
| gene | 5166231 | 5167784 | 489531 | 491084 | gene=IY08_27355 | protein=heme ABC transporter ATP-binding protein                               | protein_id=KGT41224.1 |
| gene | 5167977 | 5169371 | 491277 | 492671 | gene=IY08_27360 | protein=acyltransferase                                                        | protein_id=KGT41225.1 |
| gene | 5169384 | 5170601 | 492684 | 493901 | gene=IY08_27365 | protein=hypothetical protein                                                   | protein_id=KGT41226.1 |
| gene | 5170653 | 5171522 | 493953 | 494822 | gene=IY08_27370 | protein=TetR family transcriptional regulator                                  | protein_id=KGT41227.1 |

|      |         |         |        |        |                 |                                                   |                       |
|------|---------|---------|--------|--------|-----------------|---------------------------------------------------|-----------------------|
| gene | 5171663 | 5174779 | 494963 | 498079 | gene=IY08_27375 | protein=Swarming motility protein SwrC            | protein_id=KGT41228.1 |
| gene | 5174807 | 5175772 | 498107 | 499072 | gene=IY08_27380 | protein=methionine sulfoxide reductase            | protein_id=KGT41229.1 |
| gene | 5175863 | 5176906 | 499163 | 500206 | gene=IY08_27385 | protein=membrane protein                          | protein_id=KGT41230.1 |
| gene | 5177231 | 5177923 | 500531 | 501223 | gene=IY08_27390 | protein=antiholin LrgB                            | protein_id=KGT41231.1 |
| gene | 5177959 | 5178390 | 501259 | 501690 | gene=IY08_27395 | protein=murein hydrolase transporter LrgA         | protein_id=KGT41232.1 |
| gene | 5178523 | 5179263 | 501823 | 502563 | gene=IY08_27400 | protein=two-component response regulator          | protein_id=KGT41233.1 |
| gene | 5179241 | 5181010 | 502541 | 504310 | gene=IY08_27405 | protein=histidine kinase                          | protein_id=KGT41234.1 |
| gene | 5181335 | 5182633 | 504635 | 505933 | gene=IY08_27410 | protein=MFS transporter                           | protein_id=KGT41235.1 |
| gene | 5182686 | 5184254 | 505986 | 507554 | gene=IY08_27415 | protein=BCCT transporter                          | protein_id=KGT41236.1 |
| gene | 5184615 | 5185685 | 507915 | 508985 | gene=IY08_27420 | protein=nitric oxide synthase                     | protein_id=KGT41237.1 |
| gene | 5185903 | 5186529 | 509203 | 509829 | gene=IY08_27425 | protein=superoxide dismutase                      | protein_id=KGT41238.1 |
| gene | 5186618 | 5187496 | 509918 | 510796 | gene=IY08_27430 | protein=epimerase                                 | protein_id=KGT41239.1 |
| gene | 5187605 | 5188195 | 510905 | 511495 | gene=IY08_27435 | protein=acetamide transporter                     | protein_id=KGT41240.1 |
| gene | 5188654 | 5189670 | 511954 | 512970 | gene=IY08_27440 | protein=UDP-galactose-4-epimerase                 | protein_id=KGT41241.1 |
| gene | 5189855 | 5190502 | 513155 | 513802 | gene=IY08_27445 | protein=hemolysin                                 | protein_id=KGT41242.1 |
| gene | 5190667 | 5191227 | 513967 | 514527 | gene=IY08_27450 | protein=cytoplasmic protein                       | protein_id=KGT41243.1 |
| gene | 5191268 | 5192713 | 514568 | 516013 | gene=IY08_27455 | protein=RNA helicase                              | protein_id=KGT41244.1 |
| gene | 5193191 | 5194174 | 516491 | 517474 | gene=IY08_27460 | protein=guanosine 5'-monophosphate oxidoreductase | protein_id=KGT41245.1 |
| gene | 5194310 | 5194414 | 517610 | 517714 | gene=IY08_27465 | protein=oligoendopeptidase F                      | protein_id=KGT41246.1 |
| gene | 5194452 | 5195330 | 517752 | 518630 | gene=IY08_27470 | protein=Fe-S oxidoreductase                       | protein_id=KGT41247.1 |
| gene | 5195550 | 5197568 | 518850 | 520868 | gene=IY08_27475 | protein=ATPase                                    | protein_id=KGT41248.1 |
| gene | 5197637 | 5198116 | 520937 | 521416 | gene=IY08_27480 | protein=50S rRNA methyltransferase                | protein_id=KGT41249.1 |
| gene | 5198176 | 5198361 | 521476 | 521661 | gene=IY08_27485 | protein=50S ribosomal protein L31                 | protein_id=KGT41250.1 |
| gene | 5198415 | 5199590 | 521715 | 522890 | gene=IY08_27490 | protein=2-alkenal reductase                       | protein_id=KGT41251.1 |
| gene | 5199654 | 5200448 | 522954 | 523748 | gene=IY08_27495 | protein=metallo-beta-lactamase                    | protein_id=KGT41252.1 |
| gene | 5200432 | 5201274 | 523732 | 524574 | gene=IY08_27500 | protein=hypothetical protein                      | protein_id=KGT41253.1 |
| gene | 5201255 | 5202571 | 524555 | 525871 | gene=IY08_27505 | protein=hypothetical protein                      | protein_id=KGT41254.1 |
| gene | 5202568 | 5204409 | 525868 | 527709 | gene=IY08_27510 | protein=histidine kinase                          | protein_id=KGT41255.1 |
| gene | 5204413 | 5205117 | 527713 | 528417 | gene=IY08_27515 | protein=PhoP family transcriptional regulator     | protein_id=KGT41256.1 |
| gene | 5205402 | 5205474 | 528702 | 528774 | tRNA            |                                                   |                       |
| gene | 5205516 | 5205591 | 528816 | 528891 | tRNA            |                                                   |                       |

|      |         |         |        |        |                 |                                                                         |                       |
|------|---------|---------|--------|--------|-----------------|-------------------------------------------------------------------------|-----------------------|
| gene | 5205613 | 5205684 | 528913 | 528984 | tRNA            |                                                                         |                       |
| gene | 5205690 | 5205765 | 528990 | 529065 | tRNA            |                                                                         |                       |
| gene | 5205907 | 5207196 | 529207 | 530496 | gene=IY08_27540 | protein=adenylosuccinate synthetase                                     | protein_id=KGT41257.1 |
| gene | 5207413 | 5208774 | 530713 | 532074 | gene=IY08_27545 | protein=DNA helicase                                                    | protein_id=KGT41258.1 |
| gene | 5208802 | 5209248 | 532102 | 532548 | gene=IY08_27550 | protein=50S ribosomal protein L9                                        | protein_id=KGT41259.1 |
| gene | 5209245 | 5211218 | 532545 | 534518 | gene=IY08_27555 | protein=hypothetical protein                                            | protein_id=KGT41260.1 |
| gene | 5211297 | 5212232 | 534597 | 535532 | gene=IY08_27560 | protein=membrane protein                                                | protein_id=KGT41261.1 |
| gene | 5212313 | 5212546 | 535613 | 535846 | gene=IY08_27565 | protein=30S ribosomal protein S18                                       | protein_id=KGT41262.1 |
| gene | 5212592 | 5213104 | 535892 | 536404 | gene=IY08_27570 | protein=single-stranded DNA-binding protein                             | protein_id=KGT41263.1 |
| gene | 5213131 | 5213421 | 536431 | 536721 | gene=IY08_27575 | protein=30S ribosomal protein S6                                        | protein_id=KGT41264.1 |
| gene | 5213613 | 5214713 | 536913 | 538013 | gene=IY08_27580 | protein=GTP-binding protein                                             | protein_id=KGT41265.1 |
| gene | 5214829 | 5215026 | 538129 | 538326 | gene=IY08_27585 | protein=hypothetical protein                                            | protein_id=KGT41266.1 |
| gene | 5215047 | 5215928 | 538347 | 539228 | gene=IY08_27590 | protein=mechanosensitive ion channel protein MscS                       | protein_id=KGT41267.1 |
| gene | 5216188 | 5216784 | 539488 | 540084 | gene=IY08_27595 | protein=sporulation protein                                             | protein_id=KGT41268.1 |
| gene | 5216805 | 5217662 | 540105 | 540962 | gene=IY08_27600 | protein=plasmid partitioning protein ParB                               | protein_id=KGT41269.1 |
| gene | 5217649 | 5218410 | 540949 | 541710 | gene=IY08_27605 | protein=sporulation initiation inhibitor Soj                            | protein_id=KGT41270.1 |
| gene | 5218601 | 5219473 | 541901 | 542773 | gene=IY08_27610 | protein=chromosome partitioning protein ParB                            | protein_id=KGT41271.1 |
| gene | 5219579 | 5220298 | 542879 | 543598 | gene=IY08_27615 | protein=16S rRNA methyltransferase                                      | protein_id=KGT41272.1 |
| gene | 5220320 | 5222209 | 543620 | 545509 | gene=IY08_27620 | protein=tRNA uridine 5-carboxymethylaminomethyl<br>modification protein | protein_id=KGT41273.1 |
| gene | 5222256 | 5223632 | 545556 | 546932 | gene=IY08_27625 | protein=tRNA modification GTPase                                        | protein_id=KGT41274.1 |
| gene | 5223859 | 5224476 | 547159 | 547776 | gene=IY08_27630 | protein=Jag protein                                                     | protein_id=KGT41275.1 |
| gene | 5224473 | 5225240 | 547773 | 548540 | gene=IY08_27635 | protein=OxaA-like protein precursor                                     | protein_id=KGT41276.1 |
| gene | 5225293 | 5225640 | 548593 | 548940 | gene=IY08_27640 | protein=ribonuclease P                                                  | protein_id=KGT41277.1 |
| gene | 5225717 | 5225851 | 549017 | 549151 | gene=IY08_27645 | protein=50S ribosomal protein L34                                       | protein_id=KGT41278.1 |
| gene | 5226416 | 5227756 | 549716 | 551056 | gene=IY08_27650 | protein=chromosomal replication initiation protein                      | protein_id=KGT41279.1 |
| gene | 5227935 | 5229080 | 551235 | 552380 | gene=IY08_27655 | protein=DNA polymerase III subunit beta                                 | protein_id=KGT41280.1 |
| gene | 5229208 | 5229420 | 552508 | 552720 | gene=IY08_27660 | protein=hypothetical protein                                            | protein_id=KGT41281.1 |
| gene | 5229433 | 5230560 | 552733 | 553860 | gene=IY08_27665 | protein=recombinase RecF                                                | protein_id=KGT41282.1 |
| gene | 5230599 | 5232521 | 553899 | 555821 | gene=gyrB       | protein=DNA gyrase subunit B                                            | protein_id=KGT41283.1 |
| gene | 5232610 | 5235081 | 555910 | 558381 | gene=IY08_27675 | protein=DNA gyrase subunit A                                            | protein_id=KGT41284.1 |

|            |         |         |       |       |                 |                                               |                       |
|------------|---------|---------|-------|-------|-----------------|-----------------------------------------------|-----------------------|
| scaffold20 |         |         |       |       |                 |                                               |                       |
| gene       | 5235439 | 5235945 | 19    | 525   | gene=IY08_27680 | protein=hypothetical protein                  | protein_id=KGT40676.1 |
| gene       | 5236982 | 5237359 | 1562  | 1939  | gene=IY08_27685 | protein=GntR family transcriptional regulator | protein_id=KGT40677.1 |
| gene       | 5237359 | 5238057 | 1939  | 2637  | gene=IY08_27690 | protein=ABC transporter                       | protein_id=KGT40678.1 |
| gene       | 5238054 | 5238884 | 2634  | 3464  | gene=IY08_27695 | protein=ABC transporter permease              | protein_id=KGT40679.1 |
| gene       | 5238924 | 5239658 | 3504  | 4238  | gene=IY08_27700 | protein=membrane protein                      | protein_id=KGT40680.1 |
| gene       | 5239969 | 5240244 | 4549  | 4824  | gene=IY08_27705 | protein=hypothetical protein                  | protein_id=KGT40681.1 |
| gene       | 5240297 | 5240530 | 4877  | 5110  | gene=IY08_27710 | protein=hypothetical protein                  | protein_id=KGT40682.1 |
| gene       | 5240771 | 5241004 | 5351  | 5584  | gene=IY08_27715 | protein=hypothetical protein                  | protein_id=KGT40683.1 |
| gene       | 5241259 | 5241423 | 5839  | 6003  | gene=IY08_27720 | protein=phage protein                         | protein_id=KGT40684.1 |
| gene       | 5241978 | 5242454 | 6558  | 7034  | gene=IY08_27725 | protein=transcription factor YdeB             | protein_id=KGT40685.1 |
| gene       | 5242666 | 5243565 | 7246  | 8145  | gene=IY08_27730 | protein=fatty acid desaturase                 | protein_id=KGT40686.1 |
| gene       | 5244111 | 5244410 | 8691  | 8990  | gene=IY08_27735 | protein=hypothetical protein                  | protein_id=KGT40687.1 |
| gene       | 5244949 | 5245152 | 9529  | 9732  | gene=IY08_27740 | protein=cold-shock protein                    | protein_id=KGT40688.1 |
| gene       | 5245558 | 5246103 | 10138 | 10683 | gene=IY08_27745 | protein=hypothetical protein                  | protein_id=KGT40689.1 |
| gene       | 5246229 | 5246468 | 10809 | 11048 | gene=IY08_27750 | protein=phosphatidylserine synthase           | protein_id=KGT40690.1 |
| gene       | 5246465 | 5247370 | 11045 | 11950 | gene=IY08_27755 | protein=ABC transporter ATP-binding protein   | protein_id=KGT40691.1 |
| gene       | 5247367 | 5248155 | 11947 | 12735 | gene=IY08_27760 | protein=membrane protein                      | protein_id=KGT40692.1 |
| gene       | 5248631 | 5249032 | 13211 | 13612 | gene=IY08_27765 | protein=hypothetical protein                  | protein_id=KGT40693.1 |
| gene       | 5250818 | 5251084 | 15398 | 15664 | gene=IY08_27770 | protein=hypothetical protein                  | protein_id=KGT40694.1 |
| gene       | 5251978 | 5252184 | 16558 | 16764 | gene=IY08_27780 | protein=hypothetical protein                  | protein_id=KGT40695.1 |
| gene       | 5253391 | 5253884 | 17971 | 18464 | pseudo          |                                               |                       |
| gene       | 5254518 | 5255996 | 19098 | 20576 | gene=IY08_27795 | protein=GntR family transcriptional regulator | protein_id=KGT40696.1 |
| gene       | 5256363 | 5256782 | 20943 | 21362 | gene=IY08_27800 | protein=thioesterase                          | protein_id=KGT40697.1 |
| gene       | 5256839 | 5257615 | 21419 | 22195 | gene=IY08_27805 | protein=phenazine biosynthesis protein        | protein_id=KGT40698.1 |
| gene       | 5257634 | 5258098 | 22214 | 22678 | gene=IY08_27810 | protein=endoribonuclease L-PSP                | protein_id=KGT40699.1 |
| gene       | 5258836 | 5259309 | 23416 | 23889 | gene=IY08_27825 | protein=EBSC protein                          | protein_id=KGT40700.1 |
| gene       | 5259395 | 5259757 | 23975 | 24337 | gene=IY08_27830 | protein=hypothetical protein                  | protein_id=KGT40701.1 |
| gene       | 5260423 | 5261424 | 25003 | 26004 | gene=IY08_27835 | protein=excisionase                           | protein_id=KGT40702.1 |
| gene       | 5261828 | 5263000 | 26408 | 27580 | gene=IY08_27840 | protein=integrase                             | protein_id=KGT40703.1 |
| gene       | 5263312 | 5264607 | 27892 | 29187 | gene=IY08_27845 | protein=amino acid permease                   | protein_id=KGT40704.1 |

|      |         |         |       |       |                 |                                               |                       |
|------|---------|---------|-------|-------|-----------------|-----------------------------------------------|-----------------------|
| gene | 5264758 | 5265198 | 29338 | 29778 | gene=IY08_27850 | protein=AsnC family transcriptional regulator | protein_id=KGT40705.1 |
| gene | 5265368 | 5265556 | 29948 | 30136 | gene=IY08_27855 | protein=hypothetical protein                  | protein_id=KGT40706.1 |
| gene | 5265537 | 5266145 | 30117 | 30725 | gene=IY08_27860 | protein=cell division protein Fic             | protein_id=KGT40707.1 |
| gene | 5266419 | 5266610 | 30999 | 31190 | gene=IY08_27865 | protein=hypothetical protein                  | protein_id=KGT40708.1 |
| gene | 5266806 | 5267252 | 31386 | 31832 | gene=IY08_27870 | protein=spermidine acetyltransferase          | protein_id=KGT40709.1 |
| gene | 5267620 | 5268570 | 32200 | 33150 | pseudo          |                                               |                       |
| gene | 5269761 | 5270747 | 34341 | 35327 | gene=IY08_27880 | protein=choloylglycine hydrolase              | protein_id=KGT40710.1 |
| gene | 5270921 | 5271148 | 35501 | 35728 | pseudo          |                                               |                       |
| gene | 5271426 | 5271620 | 36006 | 36200 | gene=IY08_27890 | protein=hypothetical protein                  | protein_id=KGT40711.1 |
| gene | 5271688 | 5271963 | 36268 | 36543 | gene=IY08_27895 | protein=hypothetical protein                  | protein_id=KGT40712.1 |
| gene | 5272260 | 5273228 | 36840 | 37808 | gene=IY08_27900 | protein=membrane protein                      | protein_id=KGT40713.1 |
| gene | 5273239 | 5273898 | 37819 | 38478 | gene=IY08_27905 | protein=GntR family transcriptional regulator | protein_id=KGT40714.1 |
| gene | 5274260 | 5274595 | 38840 | 39175 | gene=IY08_27910 | protein=transposase                           | protein_id=KGT40715.1 |
| gene | 5274618 | 5274806 | 39198 | 39386 | gene=IY08_27915 | protein=homocysteine methyltransferase        | protein_id=KGT40716.1 |
| gene | 5276169 | 5277647 | 40749 | 42227 | gene=IY08_27920 | protein=FAD-binding monooxygenase             | protein_id=KGT40717.1 |
| gene | 5277893 | 5278930 | 42473 | 43510 | gene=IY08_27925 | protein=peptidase M15                         | protein_id=KGT40718.1 |
| gene | 5279178 | 5280011 | 43758 | 44591 | gene=IY08_27930 | protein=peptidase M15                         | protein_id=KGT40719.1 |
| gene | 5280753 | 5282528 | 45333 | 47108 | gene=IY08_27935 | protein=peptidoglycan-binding protein         | protein_id=KGT40720.1 |
| gene | 5282596 | 5283642 | 47176 | 48222 | gene=IY08_27940 | protein=peptidoglycan-binding protein         | protein_id=KGT40721.1 |
| gene | 5283882 | 5284823 | 48462 | 49403 | gene=IY08_27945 | protein=endonuclease I                        | protein_id=KGT40722.1 |
| gene | 5285300 | 5285947 | 49880 | 50527 | gene=IY08_27950 | protein=hypothetical protein                  | protein_id=KGT40723.1 |
| gene | 5287089 | 5288150 | 51669 | 52730 | gene=IY08_27960 | protein=protease                              | protein_id=KGT40724.1 |
| gene | 5288183 | 5288500 | 52763 | 53080 | gene=IY08_27965 | protein=hypothetical protein                  | protein_id=KGT40725.1 |
| gene | 5288902 | 5289978 | 53482 | 54558 | gene=IY08_27970 | protein=recombinase XerS                      | protein_id=KGT40726.1 |
| gene | 5291026 | 5291502 | 55606 | 56082 | pseudo          |                                               |                       |
| gene | 5292968 | 5293442 | 57548 | 58022 | pseudo          |                                               |                       |
| gene | 5293956 | 5295338 | 58536 | 59918 | gene=IY08_28000 | protein=hydrolase                             | protein_id=KGT40727.1 |
| gene | 5295994 | 5297487 | 60574 | 62067 | gene=IY08_28005 | protein=peptide transporter                   | protein_id=KGT40728.1 |
| gene | 5297726 | 5298718 | 62306 | 63298 | gene=IY08_28010 | protein=hypothetical protein                  | protein_id=KGT40729.1 |
| gene | 5298832 | 5298999 | 63412 | 63579 | gene=IY08_28015 | protein=membrane protein                      | protein_id=KGT40730.1 |
| gene | 5299453 | 5299644 | 64033 | 64224 | gene=IY08_28020 | protein=hypothetical protein                  | protein_id=KGT40731.1 |

|      |         |         |        |        |                 |                                                        |                       |
|------|---------|---------|--------|--------|-----------------|--------------------------------------------------------|-----------------------|
| gene | 5301463 | 5301783 | 66043  | 66363  | gene=IY08_28025 | protein=membrane protein                               | protein_id=KGT40732.1 |
| gene | 5302370 | 5304838 | 66950  | 69418  | gene=IY08_28030 | protein=ABC transporter permease                       | protein_id=KGT40733.1 |
| gene | 5304835 | 5305548 | 69415  | 70128  | gene=IY08_28035 | protein=peptide ABC transporter ATP-binding protein    | protein_id=KGT40734.1 |
| gene | 5305570 | 5306370 | 70150  | 70950  | gene=IY08_28040 | protein=hypothetical protein                           | protein_id=KGT40735.1 |
| gene | 5307049 | 5307741 | 71629  | 72321  | gene=IY08_28045 | protein=transcriptional regulator                      | protein_id=KGT40736.1 |
| gene | 5307746 | 5308978 | 72326  | 73558  | gene=IY08_28050 | protein=histidine kinase                               | protein_id=KGT40737.1 |
| gene | 5309496 | 5310518 | 74076  | 75098  | gene=IY08_28055 | protein=histidine kinase                               | protein_id=KGT40738.1 |
| gene | 5310515 | 5311186 | 75095  | 75766  | gene=IY08_28060 | protein=XRE family transcriptional regulator           | protein_id=KGT40739.1 |
| gene | 5311268 | 5313256 | 75848  | 77836  | gene=IY08_28065 | protein=ABC transporter                                | protein_id=KGT40740.1 |
| gene | 5313246 | 5314013 | 77826  | 78593  | gene=IY08_28070 | protein=multidrug ABC transporter ATP-binding protein  | protein_id=KGT40741.1 |
| gene | 5314281 | 5314514 | 78861  | 79094  | gene=IY08_28075 | protein=transposase                                    | protein_id=KGT40742.1 |
| gene | 5314551 | 5314840 | 79131  | 79420  | pseudo          |                                                        |                       |
| gene | 5315522 | 5317480 | 80102  | 82060  | gene=IY08_28090 | protein=ABC transporter permease                       | protein_id=KGT40743.1 |
| gene | 5318470 | 5319471 | 83050  | 84051  | gene=IY08_28095 | protein=teicoplanin resistance protein VanZ            | protein_id=KGT40744.1 |
| gene | 5320954 | 5321163 | 85534  | 85743  | gene=IY08_28100 | protein=DNA mismatch repair protein MutT               | protein_id=KGT40745.1 |
| gene | 5321443 | 5323272 | 86023  | 87852  | gene=IY08_28105 | protein=ABC transporter permease                       | protein_id=KGT40746.1 |
| gene | 5323289 | 5324050 | 87869  | 88630  | gene=IY08_28110 | protein=bacitracin ABC transporter ATP-binding protein | protein_id=KGT40747.1 |
| gene | 5324300 | 5325376 | 88880  | 89956  | gene=IY08_28115 | protein=histidine kinase                               | protein_id=KGT40748.1 |
| gene | 5325373 | 5326059 | 89953  | 90639  | gene=IY08_28120 | protein=DeoR family transcriptional regulator          | protein_id=KGT40749.1 |
| gene | 5327905 | 5328288 | 92485  | 92868  | gene=IY08_28130 | protein=alpha-ketoglutarate permease                   | protein_id=KGT40750.1 |
| gene | 5329020 | 5329490 | 93600  | 94070  | gene=IY08_28135 | protein=NTP pyrophosphohydrolase                       | protein_id=KGT40751.1 |
| gene | 5330142 | 5331086 | 94722  | 95666  | gene=IY08_28140 | protein=acetyl-CoA carboxylase subunit alpha           | protein_id=KGT40752.1 |
| gene | 5331119 | 5331565 | 95699  | 96145  | gene=IY08_28145 | protein=MarR family transcriptional regulator          | protein_id=KGT40753.1 |
| gene | 5331933 | 5332238 | 96513  | 96818  | gene=IY08_28150 | protein=transposase                                    | protein_id=KGT40754.1 |
| gene | 5332205 | 5333089 | 96785  | 97669  | gene=IY08_28155 | protein=transposase                                    | protein_id=KGT40755.1 |
| gene | 5333688 | 5334257 | 98268  | 98837  | gene=IY08_28160 | protein=methyltransferase                              | protein_id=KGT40756.1 |
| gene | 5334671 | 5336086 | 99251  | 100666 | gene=IY08_28165 | protein=phosphatidylinositol phosphodiesterase         | protein_id=KGT40757.1 |
| gene | 5336651 | 5338027 | 101231 | 102607 | gene=IY08_28170 | protein=chitin-binding protein                         | protein_id=KGT40758.1 |
| gene | 5339418 | 5340461 | 103998 | 105041 | gene=IY08_28175 | protein=cell filamentation protein Fic                 | protein_id=KGT40759.1 |
| gene | 5341319 | 5342827 | 105899 | 107407 | gene=IY08_28180 | protein=spore germination protein                      | protein_id=KGT40760.1 |
| gene | 5342814 | 5343917 | 107394 | 108497 | gene=IY08_28185 | protein=spore germination protein XA                   | protein_id=KGT40761.1 |

|      |         |         |        |        |                 |                                                         |                       |
|------|---------|---------|--------|--------|-----------------|---------------------------------------------------------|-----------------------|
| gene | 5343914 | 5345041 | 108494 | 109621 | gene=IY08_28190 | protein=spore germination protein XA                    | protein_id=KGT40762.1 |
| gene | 5346892 | 5347440 | 111472 | 112020 | gene=IY08_28205 | protein=hypothetical protein                            | protein_id=KGT40763.1 |
| gene | 5347731 | 5350454 | 112311 | 115034 | gene=IY08_28210 | protein=fibronectin                                     | protein_id=KGT40764.1 |
| gene | 5350559 | 5352925 | 115139 | 117505 | gene=IY08_28215 | protein=fibronectin                                     | protein_id=KGT40765.1 |
| gene | 5353453 | 5355693 | 118033 | 120273 | gene=IY08_28220 | protein=hypothetical protein                            | protein_id=KGT40766.1 |
| gene | 5356139 | 5356333 | 120719 | 120913 | gene=IY08_28225 | protein=hypothetical protein                            | protein_id=KGT40767.1 |
| gene | 5356445 | 5356738 | 121025 | 121318 | gene=IY08_28230 | protein=ArsR family transcriptional regulator           | protein_id=KGT40768.1 |
| gene | 5357522 | 5358616 | 122102 | 123196 | gene=IY08_28235 | protein=histidine kinase                                | protein_id=KGT40769.1 |
| gene | 5359370 | 5359783 | 123950 | 124363 | gene=IY08_28245 | protein=hypothetical protein                            | protein_id=KGT40770.1 |
| gene | 5360327 | 5360620 | 124907 | 125200 | gene=IY08_28250 | protein=ArsR family transcriptional regulator           | protein_id=KGT40771.1 |
| gene | 5360681 | 5361133 | 125261 | 125713 | gene=IY08_28255 | protein=2-oxoglutarate dehydrogenase                    | protein_id=KGT40772.1 |
| gene | 5361176 | 5361463 | 125756 | 126043 | pseudo          |                                                         |                       |
| gene | 5361536 | 5361739 | 126116 | 126319 | gene=IY08_28265 | protein=hypothetical protein                            | protein_id=KGT40773.1 |
| gene | 5361791 | 5362386 | 126371 | 126966 | pseudo          |                                                         |                       |
| gene | 5362479 | 5362689 | 127059 | 127269 | pseudo          |                                                         |                       |
| gene | 5362864 | 5362980 | 127444 | 127560 | gene=IY08_28280 | protein=DNA topoisomerase I                             | protein_id=KGT40774.1 |
| gene | 5363185 | 5364042 | 127765 | 128622 | gene=IY08_28285 | protein=glucose transporter GlcU                        | protein_id=KGT40775.1 |
| gene | 5364059 | 5364844 | 128639 | 129424 | gene=IY08_28290 | protein=sugar dehydrogenase                             | protein_id=KGT40776.1 |
| gene | 5365170 | 5365595 | 129750 | 130175 | gene=IY08_28295 | protein=hypothetical protein                            | protein_id=KGT40777.1 |
| gene | 5366238 | 5366972 | 130818 | 131552 | gene=IY08_28305 | protein=DNA integration/recombination/inversion protein | protein_id=KGT40778.1 |
| gene | 5367273 | 5367908 | 131853 | 132488 | gene=IY08_28315 | protein=hypothetical protein                            | protein_id=KGT40779.1 |
| gene | 5367925 | 5368308 | 132505 | 132888 | gene=IY08_28320 | protein=hypothetical protein                            | protein_id=KGT40780.1 |
| gene | 5368605 | 5369240 | 133185 | 133820 | gene=IY08_28325 | protein=hypothetical protein                            | protein_id=KGT40781.1 |
| gene | 5369237 | 5369869 | 133817 | 134449 | gene=IY08_28330 | protein=hypothetical protein                            | protein_id=KGT40782.1 |
| gene | 5371505 | 5372431 | 136085 | 137011 | gene=IY08_28335 | protein=hypothetical protein                            | protein_id=KGT40783.1 |
| gene | 5373582 | 5375195 | 138162 | 139775 | gene=IY08_28340 | protein=N-acetylmuramoyl-L-alanine amidase              | protein_id=KGT40784.1 |
| gene | 5376408 | 5376704 | 140988 | 141284 | gene=IY08_28345 | protein=hypothetical protein                            | protein_id=KGT40785.1 |
| gene | 5377134 | 5377301 | 141714 | 141881 | gene=IY08_28355 | protein=transposase                                     | protein_id=KGT40786.1 |
| gene | 5377774 | 5378448 | 142354 | 143028 | gene=IY08_28365 | protein=hypothetical protein                            | protein_id=KGT40787.1 |
| gene | 5378704 | 5378955 | 143284 | 143535 | gene=IY08_28370 | protein=hypothetical protein                            | protein_id=KGT40788.1 |
| gene | 5379095 | 5379868 | 143675 | 144448 | gene=IY08_28375 | protein=hypothetical protein                            | protein_id=KGT40789.1 |

|      |         |         |        |        |                 |                                                          |                       |
|------|---------|---------|--------|--------|-----------------|----------------------------------------------------------|-----------------------|
| gene | 5380001 | 5380969 | 144581 | 145549 | gene=IY08_28380 | protein=ornithine cyclodeaminase                         | protein_id=KGT40790.1 |
| gene | 5380997 | 5381974 | 145577 | 146554 | gene=IY08_28385 | protein=pyridoxal-5'-phosphate-dependent protein subunit | protein_id=KGT40791.1 |
| gene | 5382095 | 5383027 | 146675 | 147607 | gene=IY08_28390 | protein=ornithine carbamoyltransferase                   | protein_id=KGT40792.1 |
| gene | 5383816 | 5384514 | 148396 | 149094 | gene=IY08_28400 | protein=4-phosphopantetheinyl transferase                | protein_id=KGT40793.1 |
| gene | 5384763 | 5391299 | 149343 | 155879 | gene=IY08_28405 | protein=peptide synthetase                               | protein_id=KGT40794.1 |
| gene | 5391541 | 5392239 | 156121 | 156819 | gene=IY08_28410 | protein=surfactin synthetase                             | protein_id=KGT40795.1 |
| gene | 5392316 | 5396812 | 156896 | 161392 | gene=IY08_28415 | protein=peptide synthetase                               | protein_id=KGT40796.1 |
| gene | 5396794 | 5397873 | 161374 | 162453 | gene=IY08_28420 | protein=FkbH                                             | protein_id=KGT40797.1 |
| gene | 5397870 | 5400953 | 162450 | 165533 | gene=IY08_28425 | protein=peptide ABC transporter                          | protein_id=KGT40798.1 |
| gene | 5400969 | 5402045 | 165549 | 166625 | gene=IY08_28430 | protein=alkanesulfonate monooxygenase                    | protein_id=KGT40799.1 |
| gene | 5402064 | 5409752 | 166644 | 174332 | gene=IY08_28435 | protein=gramicidin synthetase                            | protein_id=KGT40800.1 |
| gene | 5409727 | 5411304 | 174307 | 175884 | gene=IY08_28440 | protein=peptide synthetase                               | protein_id=KGT40801.1 |
| gene | 5411301 | 5412494 | 175881 | 177074 | gene=IY08_28445 | protein=acyl-CoA dehydrogenase                           | protein_id=KGT40802.1 |
| gene | 5412494 | 5412739 | 177074 | 177319 | gene=IY08_28450 | protein=acyl carrier protein                             | protein_id=KGT40803.1 |
| gene | 5412770 | 5413618 | 177350 | 178198 | gene=IY08_28455 | protein=3-hydroxybutyryl-CoA dehydrogenase               | protein_id=KGT40804.1 |
| gene | 5413659 | 5414876 | 178239 | 179456 | gene=IY08_28460 | protein=malonyl CoA-acyl carrier protein                 | protein_id=KGT40805.1 |
| gene | 5414896 | 5416023 | 179476 | 180603 | gene=IY08_28465 | protein=antibiotic resistance protein                    | protein_id=KGT40806.1 |
| gene | 5416020 | 5417168 | 180600 | 181748 | gene=IY08_28470 | protein=acyl-CoA dehydrogenase                           | protein_id=KGT40807.1 |
| gene | 5417165 | 5417428 | 181745 | 182008 | gene=IY08_28475 | protein=acyl carrier protein                             | protein_id=KGT40808.1 |
| gene | 5417461 | 5420112 | 182041 | 184692 | gene=IY08_28480 | protein=bacitracin synthetase                            | protein_id=KGT40809.1 |
| gene | 5420431 | 5426154 | 185011 | 190734 | gene=IY08_28485 | protein=lichenysin synthetase                            | protein_id=KGT40810.1 |
| gene | 5426181 | 5436191 | 190761 | 200771 | gene=IY08_28490 | protein=beta-ketoacyl synthase                           | protein_id=KGT40811.1 |
| gene | 5438103 | 5438759 | 202683 | 203339 | gene=IY08_28500 | protein=hypothetical protein                             | protein_id=KGT40812.1 |
| gene | 5438929 | 5440344 | 203509 | 204924 | gene=IY08_28505 | protein=2-isopropylmalate synthase                       | protein_id=KGT40813.1 |
| gene | 5440341 | 5441405 | 204921 | 205985 | gene=IY08_28510 | protein=hydrolase                                        | protein_id=KGT40814.1 |
| gene | 5441420 | 5441857 | 206000 | 206437 | gene=IY08_28515 | protein=hypothetical protein                             | protein_id=KGT40815.1 |
| gene | 5441872 | 5442738 | 206452 | 207318 | gene=IY08_28520 | protein=molybdopterin biosynthesis protein MoeB          | protein_id=KGT40816.1 |
| gene | 5442752 | 5443600 | 207332 | 208180 | gene=IY08_28525 | protein=molybdopterin biosynthesis protein MoeB          | protein_id=KGT40817.1 |
| gene | 5445461 | 5445850 | 210041 | 210430 | gene=IY08_28540 | protein=hypothetical protein                             | protein_id=KGT40818.1 |
| gene | 5445874 | 5446383 | 210454 | 210963 | gene=IY08_28545 | protein=hypothetical protein                             | protein_id=KGT40819.1 |
| gene | 5446478 | 5446930 | 211058 | 211510 | gene=IY08_28550 | protein=histidine kinase                                 | protein_id=KGT40820.1 |



|      |         |         |        |        |                 |                                       |                       |
|------|---------|---------|--------|--------|-----------------|---------------------------------------|-----------------------|
| gene | 5447280 | 5448680 | 211860 | 213260 | gene=IY08_28565 | protein=multidrug transporter MatE    | protein_id=KGT40821.1 |
| gene | 5449610 | 5450476 | 214190 | 215056 | gene=IY08_28570 | protein=alpha/beta hydrolase          | protein_id=KGT40822.1 |
| gene | 5450544 | 5451746 | 215124 | 216326 | gene=IY08_28575 | protein=glycosyl transferase          | protein_id=KGT40823.1 |
| gene | 5452040 | 5452570 | 216620 | 217150 | gene=IY08_28580 | protein=GNAT family acetyltransferase | protein_id=KGT40824.1 |
| gene | 5452980 | 5453951 | 217560 | 218531 | gene=IY08_28585 | protein=esterase                      | protein_id=KGT40825.1 |

| prot_acc   | prot_desc                                                        | prot_score | prot_mass | pep_query | pep_exp_mz | pep_exp_mr | pep_score | pep_expect | pep_res_before | pep_seq      | pep_res_after |
|------------|------------------------------------------------------------------|------------|-----------|-----------|------------|------------|-----------|------------|----------------|--------------|---------------|
| KGT40398.1 | bacteriocin ABC transporter ATPase, partial [Bacillus cereus]    | 30         | 32920     | 72        | 487.28     | 972.545    | 30.1      | 0.0062     | K              | EINRTALR     | N             |
| KGT40399.1 | GntR family transcriptional regulator, partial [Bacillus cereus] | 14         | 32148     | 551       | 695.86     | 1389.71    | 14        | 0.049      | R              | VALSSTNSLEEL | I             |
| KGT40407.1 | carbonic anhydrase [Bacillus cereus]                             | 21         | 21397     | 337       | 679.356    | 678.348    | 21.2      | 0.036      | K              | TLNGMK       | H             |
| KGT40418.1 | fibronectin [Bacillus cereus]                                    | 82         | 82074     | 1745      | 732.862    | 1463.71    | 82.3      | 2.60E-08   | K              | ISSGTWENNSN  | N             |
| KGT40418.1 | fibronectin [Bacillus cereus]                                    | 82         | 82074     | 816       | 372.894    | 1115.66    | 10.8      | 0.15       | K              | KK           | N             |
| KGT40418.1 | fibronectin [Bacillus cereus]                                    | 82         | 82074     | 816       | 372.894    | 1115.66    | 10.8      | 0.15       | K              | KIYPNKPTR    | L             |
| KGT40418.1 | fibronectin [Bacillus cereus]                                    | 82         | 82074     | 2887      | 774.058    | 2319.15    | 8.17      | 0.17       | K              | YIVNQDPVPPLL | A             |
| KGT40445.1 | PhoP family transcriptional regulator [Bacillus cereus]          | 22         | 27678     | 951       | 587.322    | 1172.63    | 21.8      | 0.046      | K              | NKYDEMIR     | D             |
| KGT40513.1 | hypothetical protein IY08_29645 [Bacillus cereus]                | 26         | 27214     | 176       | 604.318    | 1206.62    | 26.3      | 0.007      | K              | KNILIVDDDK   | N             |
| KGT40513.1 | hypothetical protein IY08_29645 [Bacillus cereus]                | 26         | 27214     | 149       | 575.81     | 1149.61    | 8.05      | 1          | K              | EKELMEGSIR   | W             |
| KGT40528.1 | aspartate phosphatase [Bacillus cereus]                          | 21         | 41847     | 670       | 777.401    | 1552.79    | 21        | 0.036      | K              | RLTSNAFEGR   | T             |
| KGT40610.1 | hypothetical protein IY08_28935 [Bacillus cereus]                | 23         | 7379      | 240       | 616.404    | 615.396    | 23.3      | 0.033      | K              | ANEVFSISPGYE | Q             |
| KGT40688.1 | cold-shock protein [Bacillus cereus]                             | 23         | 7406      | 159       | 590.308    | 1178.6     | 22.5      | 0.037      | K              | KDLLK        | G             |
| KGT40714.1 | GntR family transcriptional regulator [Bacillus cereus]          | 23         | 24995     | 240       | 616.404    | 615.396    | 23.3      | 0.033      | K              | GNVKWVFNGEK  | S             |
| KGT40760.1 | spore gernimation protein [Bacillus cereus]                      | 23         | 56084     | 144       | 421.759    | 841.504    | 1.92      | 1.5        | K              | KDIK         | Y             |
| KGT40760.1 | spore gernimation protein [Bacillus cereus]                      | 23         | 56084     | 462       | 652.812    | 1303.61    | 23.3      | 0.019      | K              | NIGLIRR      | N             |
| KGT40764.1 | fibronectin [Bacillus cereus]                                    | 0          | 1E+05     | 275       | 635.336    | 634.329    | 4.67      | 1.6        | K              | GSHDGFIENTV  | S             |
| KGT40765.1 | fibronectin [Bacillus cereus]                                    | 26         | 88818     | 240       | 616.404    | 615.396    | 25.7      | 0.019      | K              | K            | N             |
| KGT40826.1 | acyl-CoA dehydrogenase [Bacillus cereus]                         | 73         | 65683     | 606       | 552.811    | 1103.61    | 40.8      | 0.00017    | K              | KVQIK        | L             |

|            |                                          |     |       |      |         |         |      |          |   |             |   |
|------------|------------------------------------------|-----|-------|------|---------|---------|------|----------|---|-------------|---|
| KGT40826.1 | acyl-CoA dehydrogenase [Bacillus         | 73  | 65683 | 750  | 596.802 | 1191.59 | 49.8 | 6.10E-05 | R | IFEGTNEINR  | L |
| KGT40826.1 | acyl-CoA dehydrogenase [Bacillus         | 77  | 65683 | 489  | 508.32  | 1014.63 | 7.63 | 0.22     | R | LIVPGTFLR   | K |
| KGT40826.1 | acyl-CoA dehydrogenase [Bacillus         | 77  | 65683 | 676  | 573.774 | 1145.53 | 15.5 | 0.11     | K | TYAAESSVYR  | T |
| KGT40826.1 | acyl-CoA dehydrogenase [Bacillus cereus] | 77  | 65683 | 1441 | 896.461 | 1790.91 | 19.6 | 0.015    | K | LAAYALTEPGS |   |
|            |                                          |     |       |      |         |         |      |          |   | GSDALGAK    | T |
| KGT40863.1 | peptidase M4 [Bacillus cereus]           | 38  | 60513 | 1540 | 697.346 | 1392.68 | 38.1 | 0.00027  | R | QAALQSAEDLY |   |
|            |                                          |     |       |      |         |         |      |          |   | GK          | N |
|            |                                          |     |       |      |         |         |      |          |   | YTGTADNGGV  |   |
| KGT40863.1 | peptidase M4 [Bacillus cereus]           | 39  | 60513 | 2551 | 654.978 | 1961.91 | 14.6 | 0.043    | R | HINSSINNK   | A |
| KGT40863.1 | peptidase M4 [Bacillus cereus]           | 385 | 60513 | 227  | 529.762 | 1057.51 | 40.1 | 0.00031  | K | YLTANSDFK   | M |
| KGT40863.1 | peptidase M4 [Bacillus cereus]           | 385 | 60513 | 286  | 563.782 | 1125.55 | 57.6 | 7.90E-06 | K | TGQFNLFDGK  | R |
| KGT40863.1 | peptidase M4 [Bacillus cereus]           | 385 | 60513 | 314  | 583.786 | 1165.56 | 46.9 | 0.00011  | R | QSFEIAQDTK  | T |
| KGT40863.1 | peptidase M4 [Bacillus cereus]           | 385 | 60513 | 431  | 641.83  | 1281.65 | 67.6 | 9.90E-07 | K | TGQFNLFDGKR | G |
| KGT40863.1 | peptidase M4 [Bacillus cereus]           | 385 | 60513 | 676  | 522.592 | 1564.75 | 69.8 | 6.10E-07 | K | AAYLVSEGGDH |   |
|            |                                          |     |       |      |         |         |      |          |   | YGVK        | V |
|            |                                          |     |       |      |         |         |      |          |   | QAALQSAEDLY |   |
| KGT40863.1 | peptidase M4 [Bacillus cereus]           | 385 | 60513 | 786  | 574.962 | 1721.86 | 25.7 | 0.0039   | R | GKNSK       | A |
|            |                                          |     |       |      |         |         |      |          |   | SWDLGADIYTP |   |
| KGT40863.1 | peptidase M4 [Bacillus cereus]           | 385 | 60513 | 1087 | 697.346 | 2089.02 | 74.9 | 9.50E-08 | K | DKPGDALR    | S |
|            |                                          |     |       |      |         |         |      |          |   | NESGALNESLS |   |
| KGT40863.1 | peptidase M4 [Bacillus cereus]           | 390 | 60513 | 1169 | 751.036 | 2250.09 | 22.3 | 0.018    | K | DIMGVMVEKK  | S |
| KGT40883.1 | adhesin [Bacillus cereus]                | 47  | 34294 | 397  | 624.817 | 1247.62 | 46.7 | 6.10E-05 | K | QIDINDLDFR  | N |
| KGT40883.1 | adhesin [Bacillus cereus]                | 49  | 34294 | 208  | 520.269 | 1038.52 | 18   | 0.021    | K | QTPAGGFSFK  | V |
|            |                                          |     |       |      |         |         |      |          |   | SPQELGVSDW  |   |
| KGT40883.1 | adhesin [Bacillus cereus]                | 49  | 34294 | 424  | 637.801 | 1273.59 | 1.31 | 2.4      | K | R           | E |
|            |                                          |     |       |      |         |         |      |          |   | GTPTIQNAVVL |   |
| KGT40883.1 | adhesin [Bacillus cereus]                | 182 | 34294 | 115  | 756.427 | 1510.84 | 53.2 | 1.60E-05 | K | LER         | S |
|            |                                          |     |       |      |         |         |      |          |   | EAHYATQLAV  |   |
| KGT40883.1 | adhesin [Bacillus cereus]                | 182 | 34294 | 151  | 572.304 | 1713.89 | 28.3 | 0.0039   | R | WNALK       | Q |
|            |                                          |     |       |      |         |         |      |          |   | NDFFETGLYTV |   |
| KGT40883.1 | adhesin [Bacillus cereus]                | 182 | 34294 | 178  | 924.94  | 1847.87 | 5.73 | 0.29     | K | ETNAK       | S |

|            |                                   |     |       |      |         |         |      |            |               |   |
|------------|-----------------------------------|-----|-------|------|---------|---------|------|------------|---------------|---|
|            |                                   |     |       |      |         |         |      |            | ASASEELQEIT   |   |
|            |                                   |     |       |      |         |         |      |            | MSVTPTEEQEA   |   |
| KGT40883.1 | adhesin [Bacillus cereus]         | 182 | 34294 | 360  | 907.466 | 2719.38 | 1.93 | 2.9 K      | VLK           | N |
| KGT40917.1 | enolase [Bacillus cereus]         | 72  | 46417 | 1004 | 678.888 | 1355.76 | 43.9 | 0.00011 R  | EALEVIIIEAIEK | A |
|            |                                   |     |       |      |         |         |      |            | GLNTAVGDEG    |   |
| KGT40917.1 | enolase [Bacillus cereus]         | 72  | 46417 | 1571 | 973.469 | 1944.92 | 30.4 | 0.0014 K   | GFAPNLGSNR    | E |
|            |                                   |     |       |      |         |         |      |            | LGANAILGVSM   |   |
|            |                                   |     |       |      |         |         |      |            | AVAHAAADFV    |   |
| KGT40917.1 | enolase [Bacillus cereus]         | 72  | 46417 | 1922 | 905.17  | 2712.49 | 27.4 | 0.0025 K   | GLPLYR        | Y |
| KGT40917.1 | enolase [Bacillus cereus]         | 80  | 46417 | 517  | 519.284 | 1036.55 | 23.3 | 0.018 M    | STIIDVYAR     | E |
|            |                                   |     |       |      |         |         |      |            |               |   |
| KGT40917.1 | enolase [Bacillus cereus]         | 80  | 46417 | 763  | 602.801 | 1203.59 | 18.4 | 0.03 R     | AMIELDGTPNK   | G |
|            |                                   |     |       |      |         |         |      |            | ESIRMGAEVFH   |   |
| KGT40917.1 | enolase [Bacillus cereus]         | 80  | 46417 | 1283 | 802.43  | 1602.84 | 1.45 | 3.9 K      | ALK           | A |
|            |                                   |     |       |      |         |         |      |            | IEDELGEIAVYD  |   |
| KGT40917.1 | enolase [Bacillus cereus]         | 80  | 46417 | 1345 | 832.424 | 1662.83 | 13.2 | 0.058 R    | GIK           | S |
|            |                                   |     |       |      |         |         |      |            | VQLVGDDLFT    |   |
| KGT40917.1 | enolase [Bacillus cereus]         | 80  | 46417 | 1363 | 838.949 | 1675.88 | 15.1 | 0.15 K     | NTQK          | L |
|            |                                   |     |       |      |         |         |      |            | IGDKVQLVGDD   |   |
| KGT40917.1 | enolase [Bacillus cereus]         | 42  | 46417 | 526  | 697.378 | 2089.11 | 25.9 | 0.0088 R   | LFVTNTQK      | L |
| KGT40918.1 | phosphoglyceromutase [Bacillus    | 65  | 56403 | 429  | 483.277 | 964.539 | 26.8 | 0.008 R    | VVYQSLTR      | V |
|            | phosphoglyceromutase [Bacillus    |     |       |      |         |         |      |            | ETGVGQFATIS   |   |
| KGT40918.1 | cereus]                           | 65  | 56403 | 957  | 661.837 | 1321.66 | 55.9 | 9.10E-06 K | GR            | Y |
| KGT40918.1 | phosphoglyceromutase [Bacillus    | 65  | 56403 | 551  | 532.242 | 1062.47 | 14.3 | 0.1 R      | EAEFPGEER     | I |
|            |                                   |     |       |      |         |         |      |            | EGGILGDIAPT   |   |
|            | phosphoglyceromutase [Bacillus    |     |       |      |         |         |      |            | MLTLLNVEQPK   |   |
| KGT40918.1 | cereus]                           | 65  | 56403 | 1972 | 963.163 | 2886.47 | 5.5  | 1.3 R      | EMTGK         | T |
|            | phosphoglycerate kinase [Bacillus |     |       |      |         |         |      |            | IVGIDSIPSNWE  |   |
| KGT40920.1 | cereus]                           | 43  | 42485 | 1586 | 998.525 | 1995.04 | 29.2 | 0.0057 K   | GVDIGPK       | T |
|            |                                   |     |       |      |         |         |      |            | AVGQALADAE    |   |
|            | phosphoglycerate kinase [Bacillus |     |       |      |         |         |      |            | DTYSVIGGGDS   |   |
| KGT40920.1 | cereus]                           | 43  | 42485 | 1869 | 855.752 | 2564.24 | 33.4 | 0.0024 K   | AAAVEK        | F |

|            |                                                  |     |       |      |         |         |      |          |   |                        |   |
|------------|--------------------------------------------------|-----|-------|------|---------|---------|------|----------|---|------------------------|---|
| KGT40920.1 | phosphoglycerate kinase [Bacillus cereus]        | 43  | 42485 | 1261 | 528.926 | 1583.76 | 3.89 | 0.49     | R | FYAGEEEKNDALAK         | E |
| KGT40920.1 | phosphoglycerate kinase [Bacillus cereus]        | 43  | 42485 | 1403 | 581.328 | 1740.96 | 7.95 | 0.34     | K | ALSNPERPFTAIIGGAK      | V |
| KGT40920.1 | phosphoglycerate kinase [Bacillus cereus]        | 43  | 42485 | 1982 | 747.148 | 2984.56 | 8.96 | 0.33     | R | AHASTAGIADYLPAVSGLLMEK | A |
| KGT40920.1 | phosphoglycerate kinase [Bacillus cereus]        | 17  | 42485 | 964  | 657.384 | 1969.13 | 16.7 | 0.025    | K | ELDVLGKALSNPERPFTAI    | D |
| KGT40920.1 | phosphoglycerate kinase [Bacillus cereus]        | 34  | 42485 | 260  | 679.007 | 2034    | 2.62 | 0.62     | K | IGGAKVKEFAALADIFVN     | A |
| KGT40974.1 | cytochrome C~ [Bacillus cereus]                  | 27  | 11357 | 1576 | 703.331 | 1404.65 | 27   | 0.0075   | R | DAFGAAHRGSMSPGLIQGE    | K |
| KGT40974.1 | cytochrome C~ [Bacillus cereus]                  | 27  | 11357 | 1071 | 613.829 | 1225.64 | 9.68 | 0.37     | K | DAK                    | - |
| KGT41074.1 | 3-hydroxyacyl-ACP dehydratase [Bacillus cereus]  | 71  | 16047 | 613  | 497.782 | 993.55  | 27.3 | 0.0048   | R | KVSEWLAEHK             | I |
| KGT41074.1 | 3-hydroxyacyl-ACP dehydratase [Bacillus cereus]  | 71  | 16047 | 713  | 529.794 | 1057.57 | 62.6 | 3.20E-06 | K | YPFLLVDK               | A |
| KGT41074.1 | 3-hydroxyacyl-ACP dehydratase [Bacillus cereus]  | 71  | 16047 | 1007 | 599.844 | 1197.67 | 5.69 | 0.66     | K | ILEVDEGKR              | L |
| KGT41081.1 | transcriptional regulator [Bacillus cereus]      | 17  | 38652 | 1973 | 773.404 | 1544.79 | 16.6 | 0.055    | K | KQVRPGDQLRANQLPEMELKV  | G |
| KGT41101.1 | ATP FOF1 synthase subunit beta [Bacillus cereus] | 180 | 50936 | 2389 | 899.952 | 1797.89 | 104  | 1.70E-10 | R | EK                     | Q |
| KGT41101.1 | ATP FOF1 synthase subunit beta [Bacillus cereus] | 195 | 50936 | 1052 | 610.814 | 1219.61 | 23   | 0.011    | R | ALSPEIVGEEHY           | V |
| KGT41101.1 | ATP FOF1 synthase subunit beta [Bacillus cereus] | 195 | 50936 | 1268 | 651.84  | 1301.67 | 3.35 | 1.5      | R | QAPAFEELSTK            | F |
| KGT41101.1 | ATP FOF1 synthase subunit beta [Bacillus cereus] | 195 | 50936 | 1904 | 757.91  | 1513.81 | 2.03 | 2.7      | K | VTQIMGPVVDVK           | F |
| KGT41101.1 | ATP FOF1 synthase subunit beta [Bacillus cereus] | 195 | 50936 | 2488 | 637.308 | 1908.9  | 17.3 | 0.024    | K | GRVTQIMGPVVDVK         | L |

|            |                                                      |    |       |      |         |         |      |          |   |                            |   |
|------------|------------------------------------------------------|----|-------|------|---------|---------|------|----------|---|----------------------------|---|
| KGT41101.1 | ATP FOF1 synthase subunit beta<br>[Bacillus cereus]  | 59 | 50936 | 834  | 626.816 | 1251.62 | 24.8 | 0.0048   | R | TVAMSSTDGLV<br>R           | G |
| KGT41101.1 | ATP FOF1 synthase subunit beta<br>[Bacillus cereus]  | 59 | 50936 | 1111 | 718.383 | 1434.75 | 38.2 | 0.00026  | R | FTQAGSEVSAL<br>LGR         | M |
| KGT41101.1 | ATP FOF1 synthase subunit beta<br>[Bacillus cereus]  | 59 | 50936 | 850  | 630.865 | 1259.72 | 3.98 | 1.2      | K | LPEIYNALTVK                | Q |
| KGT41101.1 | ATP FOF1 synthase subunit beta<br>[Bacillus cereus]  | 57 | 50936 | 296  | 685.88  | 1369.75 | 43.8 | 0.00014  | R | LVGGIEEVIENA<br>K          | K |
| KGT41101.1 | ATP FOF1 synthase subunit beta<br>[Bacillus cereus]  | 57 | 50936 | 557  | 742.727 | 2225.16 | 30.9 | 0.0032   | R | GTEVEDTGKPIS<br>VPVGDVTLGR | V |
| KGT41101.1 | ATP FOF1 synthase subunit beta<br>[Bacillus cereus]  | 61 | 50936 | 73   | 488.285 | 974.555 | 4.46 | 1.1      | K | IGLFGGAGVGK                | T |
| KGT41102.1 | ATP synthase FOF1 subunit gamma<br>[Bacillus cereus] | 65 | 31586 | 1349 | 665.375 | 1328.73 | 64.6 | 1.10E-06 | K | IQEVVASIAQGS<br>K          | G |
| KGT41102.1 | ATP synthase FOF1 subunit gamma<br>[Bacillus cereus] | 51 | 31586 | 366  | 610.82  | 1219.62 | 51.3 | 1.50E-05 | R | GLAGGYNSNVL<br>R           | T |
| KGT41103.1 | ATP FOF1 synthase subunit alpha<br>[Bacillus cereus] | 59 | 54656 | 653  | 512.811 | 1023.61 | 58.7 | 1.40E-06 | K | AIDALVPIGR                 | G |
| KGT41103.1 | ATP FOF1 synthase subunit alpha<br>[Bacillus cereus] | 59 | 54656 | 557  | 469.756 | 937.497 | 4.12 | 1.7      | K | FAAAINGFK                  | K |
| KGT41103.1 | ATP FOF1 synthase subunit alpha<br>[Bacillus cereus] | 35 | 54656 | 747  | 595.372 | 1188.73 | 34.6 | 0.00035  | K | QVIILYALTR                 | G |
| KGT41112.1 | serine hydroxymethyltransferase<br>[Bacillus cereus] | 71 | 45282 | 516  | 438.251 | 874.488 | 71   | 4.30E-07 | R | IGTAAVTSR                  | G |
| KGT41112.1 | serine hydroxymethyltransferase<br>[Bacillus cereus] | 71 | 45282 | 1541 | 697.352 | 1392.69 | 5.17 | 0.33     | K | TYAQNIINNAN<br>R           | L |
| KGT41112.1 | serine hydroxymethyltransferase<br>[Bacillus cereus] | 23 | 45282 | 282  | 559.327 | 1116.64 | 23.4 | 0.017    | K | LIVAGASAYPR<br>AVAFGEALQD  | V |
| KGT41112.1 | serine hydroxymethyltransferase<br>[Bacillus cereus] | 23 | 45282 | 1319 | 928.464 | 2782.37 | 13   | 0.26     | K | DFKTYAQNIIN<br>NANR        | L |

|            |                                     |    |       |      |         |         |      |  |          |   |               |
|------------|-------------------------------------|----|-------|------|---------|---------|------|--|----------|---|---------------|
|            | tRNA threonylcarbamoyladenosine     |    |       |      |         |         |      |  |          |   |               |
| KGT41121.1 | biosynthesis protein [Bacillus      | 15 | 37430 | 45   | 544.296 | 1086.58 | 15.3 |  | 0.037    | K | VTAGLNTVGVR M |
|            | 3-hydroxybutyryl-CoA                |    |       |      |         |         |      |  |          |   | VPVEVNDPFGF   |
| KGT41139.1 | dehydrogenase [Bacillus cereus]     | 53 | 31475 | 145  | 838.423 | 1674.83 | 53.2 |  | 1.00E-05 | K | VSNR I        |
|            | 3-hydroxybutyryl-CoA                |    |       |      |         |         |      |  |          |   | ILLPMINEAIYTL |
| KGT41139.1 | dehydrogenase [Bacillus cereus]     | 57 | 31475 | 295  | 756.744 | 2267.21 | 21   |  | 0.029    | R | YEGVATK E     |
|            |                                     |    |       |      |         |         |      |  |          |   | ANVAASDVEEV   |
|            | acetyl-CoA acetyltransferase        |    |       |      |         |         |      |  |          |   | IFGTVIQGGQG   |
| KGT41140.1 | [Bacillus cereus]                   | 33 | 41248 | 1931 | 914.815 | 2741.42 | 33.4 |  | 0.0017   | R | QIPSR Q       |
| KGT41154.1 | aminopeptidase [Bacillus cereus]    | 19 | 50758 | 509  | 864.404 | 863.397 | 19.5 |  | 0.047    | K | SEEWASR Y     |
|            | spermidine synthase [Bacillus       |    |       |      |         |         |      |  |          |   | QYLPSIAGALD   |
| KGT41164.1 | cereus]                             | 36 | 31123 | 994  | 668.023 | 2001.05 | 35.7 |  | 0.0012   | K | NERVEVK V     |
|            | ferrichrome ABC transporter         |    |       |      |         |         |      |  |          |   | DMILDEVAEFV   |
| KGT41173.1 | substrate-binding protein [Bacillus | 38 | 35208 | 129  | 797.911 | 1593.81 | 23.2 |  | 0.0067   | K | LGK -         |
|            | ferrichrome ABC transporter         |    |       |      |         |         |      |  |          |   | IYGDYGYGSVIF  |
| KGT41173.1 | substrate-binding protein [Bacillus | 38 | 35208 | 302  | 778.083 | 2331.23 | 31.1 |  | 0.0027   | R | NDLKLPAVK G   |
|            | phosphotransacetylase [Bacillus     |    |       |      |         |         |      |  |          |   | LAKEELVKPILV  |
| KGT41180.1 | cereus]                             | 21 | 34825 | 2227 | 560.345 | 1678.01 | 21.2 |  | 0.0076   | R | GNR E         |
|            | phosphotransacetylase [Bacillus     |    |       |      |         |         |      |  |          |   | SPETEKVVEAT   |
| KGT41180.1 | cereus]                             | 19 | 34825 | 508  | 673.347 | 1344.68 | 10.7 |  | 0.099    | K | R I           |
|            | phosphotransacetylase [Bacillus     |    |       |      |         |         |      |  |          |   | GDANVFVFPSL   |
| KGT41180.1 | cereus]                             | 19 | 34825 | 985  | 999.506 | 1997    | 19.2 |  | 0.016    | K | EAGNIGYK I    |
|            | phosphotransacetylase [Bacillus     |    |       |      |         |         |      |  |          |   | GISIVLPEGTDE  |
| KGT41180.1 | cereus]                             | 19 | 34825 | 1090 | 699.386 | 2095.14 | 15.1 |  | 0.069    | K | RILGAAER L    |
|            |                                     |    |       |      |         |         |      |  |          |   | LGNFEAVGPIL   |
|            | phosphotransacetylase [Bacillus     |    |       |      |         |         |      |  |          |   | QGLNMPVNDL    |
| KGT41180.1 | cereus]                             | 19 | 34825 | 1236 | 619.052 | 2472.18 | 2.33 |  | 0.6      | R | SR G          |
|            |                                     |    |       |      |         |         |      |  |          |   | YGEFGTFFVGN   |
| KGT41181.1 | heme peroxidase [Bacillus cereus]   | 30 | 28759 | 1775 | 763.719 | 2288.13 | 30   |  | 0.0015   | R | ILPDEKVEK F   |
|            | spore germination protein GerQ      |    |       |      |         |         |      |  |          |   |               |
| KGT41184.1 | [Bacillus cereus]                   | 91 | 16090 | 1002 | 599.299 | 1196.58 | 57   |  | 1.00E-05 | K | QATVVMTYER G  |
|            | hypothetical protein IY08_27505     |    |       |      |         |         |      |  |          |   |               |
| KGT41254.1 | [Bacillus cereus]                   | 23 | 49969 | 240  | 616.404 | 615.396 | 23.3 |  | 0.033    | K | KQVIK D       |

|            |                                        |     |       |      |         |         |      |          |   |               |   |
|------------|----------------------------------------|-----|-------|------|---------|---------|------|----------|---|---------------|---|
| KGT41291.1 | cell surface protein [Bacillus cereus] | 23  | 3E+05 | 240  | 616.404 | 615.396 | 23.3 | 0.033    | M | KQVLK         | C |
| KGT41291.1 | cell surface protein [Bacillus cereus] | 23  | 3E+05 | 491  | 421.231 | 840.448 | 2    | 1.6      | K | TVNNPAPK      | L |
| KGT41291.1 | cell surface protein [Bacillus cereus] | 23  | 3E+05 | 506  | 430.242 | 858.469 | 4.76 | 1.5      | K | IASNKTPK      | L |
|            |                                        |     |       |      |         |         |      |          |   | VMAKYPEITDT   |   |
| KGT41291.1 | cell surface protein [Bacillus cereus] | 23  | 3E+05 | 2228 | 841.392 | 1680.77 | 0.51 | 3.8      | K | EER           | S |
|            |                                        |     |       |      |         |         |      |          |   | QNNDNGIEFLS   |   |
| KGT41291.1 | cell surface protein [Bacillus cereus] | 23  | 3E+05 | 2819 | 1113.5  | 2224.99 | 1.48 | 1.9      | K | QSVKVNGEK     | L |
|            | methionine ABC transporter             |     |       |      |         |         |      |          |   | IKDGVDPVSAT   |   |
| KGT41343.1 | substrate-binding protein [Bacillus    | 62  | 29878 | 1337 | 663.869 | 1325.72 | 62.1 | 1.90E-06 | K | PK            | D |
|            | glucose-6-phosphate isomerase          |     |       |      |         |         |      |          |   | ALSFIGEHEITYL |   |
| KGT41362.1 | [Bacillus cereus]                      | 162 | 50391 | 2177 | 824.942 | 1647.87 | 81.5 | 3.30E-08 | K | R             | D |
|            | glucose-6-phosphate isomerase          |     |       |      |         |         |      |          |   | TLADNEGYETF   |   |
| KGT41362.1 | [Bacillus cereus]                      | 51  | 50391 | 1704 | 1084.52 | 2167.02 | 26.2 | 0.0095   | K | VIPDDVGGR     | F |
|            |                                        |     |       |      |         |         |      |          |   | GIFPSSANFSTD  |   |
|            | glucose-6-phosphate isomerase          |     |       |      |         |         |      |          |   | LHSLGQYVQEG   |   |
| KGT41362.1 | [Bacillus cereus]                      | 51  | 50391 | 1895 | 870.755 | 2609.24 | 8.4  | 0.77     | K | R             | R |
|            |                                        |     |       |      |         |         |      |          |   | TGAGNDFLGW    |   |
|            | glucose-6-phosphate isomerase          |     |       |      |         |         |      |          |   | VDLPLQYDKEE   |   |
| KGT41362.1 | [Bacillus cereus]                      | 51  | 50391 | 1929 | 914.45  | 2740.33 | 5.41 | 1.4      | K | FAR           | I |
|            | glucose-6-phosphate isomerase          |     |       |      |         |         |      |          |   |               |   |
| KGT41362.1 | [Bacillus cereus]                      | 30  | 50391 | 210  | 625.823 | 1249.63 | 23.6 | 0.026    | K | SGTTTEPALAFR  | I |
|            |                                        |     |       |      |         |         |      |          |   | GAAAGRDDFG    |   |
|            | glucose-6-phosphate isomerase          |     |       |      |         |         |      |          |   | TSELEENPAYQ   |   |
| KGT41362.1 | [Bacillus cereus]                      | 30  | 50391 | 598  | 929.434 | 2785.28 | 24.5 | 0.015    | K | YAVVR         | N |
|            | sporulation inhibitor KapD [Bacillus   |     |       |      |         |         |      |          |   |               |   |
| KGT41375.1 | cereus]                                | 19  | 23980 | 452  | 495.28  | 988.544 | 19   | 0.048    | K | GISFPELVK     | K |
| KGT41384.1 | phosphoglucomutase [Bacillus           | 204 | 64271 | 440  | 488.279 | 974.543 | 31.4 | 0.0041   | K | TIVTSEIGR     | T |
|            | phosphoglucomutase [Bacillus           |     |       |      |         |         |      |          |   |               |   |
| KGT41384.1 | cereus]                                | 204 | 64271 | 1101 | 713.878 | 1425.74 | 57.4 | 7.40E-06 | K | TLYDGLLEVFEK  | Y |
|            | phosphoglucomutase [Bacillus           |     |       |      |         |         |      |          |   | AYGLDVTDTLT   |   |
| KGT41384.1 | cereus]                                | 204 | 64271 | 1187 | 750.885 | 1499.75 | 68.4 | 6.90E-07 | K | GFK           | F |
|            | phosphoglucomutase [Bacillus           |     |       |      |         |         |      |          |   | GITTYVFESLRP  |   |
| KGT41384.1 | cereus]                                | 204 | 64271 | 1808 | 785.104 | 2352.29 | 101  | 1.20E-10 | R | TPVLSFAVR     | H |



|            |                                                  |     |       |      |         |         |      |          |   |                                     |   |
|------------|--------------------------------------------------|-----|-------|------|---------|---------|------|----------|---|-------------------------------------|---|
| KGT41384.1 | phosphoglucomutase [Bacillus cereus]             | 211 | 64271 | 1214 | 764.385 | 1526.76 | 17.4 | 0.097    | K | VGADVLIATDP<br>DADR                 | L |
| KGT41384.1 | phosphoglucomutase [Bacillus cereus]             | 211 | 64271 | 1376 | 563.305 | 1686.89 | 21.4 | 0.034    | K | YGFFREDLVSLT<br>LK                  | G |
| KGT41384.1 | phosphoglucomutase [Bacillus cereus]             | 211 | 64271 | 1400 | 577.611 | 1729.81 | 3.06 | 2.4      | K | SPNPEEHAAFE<br>YAIR                 | D |
| KGT41384.1 | phosphoglucomutase [Bacillus cereus]             | 211 | 64271 | 1761 | 753.677 | 2258.01 | 11   | 0.28     | K | YQLEDGSWFCL<br>RPSGTEPK             | I |
| KGT41384.1 | phosphoglucomutase [Bacillus cereus]             | 211 | 64271 | 1979 | 980.183 | 2937.53 | 23.7 | 0.018    | K | TDGLLHIIGQEV<br>DDAYAAELNN<br>VIINK | E |
| KGT41441.1 | dihydropteridine reductase [Bacillus cereus]     | 16  | 76068 | 261  | 628.347 | 627.34  | 7.64 | 0.17     | K | QKHSK                               | K |
| KGT41441.1 | dihydropteridine reductase [Bacillus cereus]     | 16  | 76068 | 1420 | 675.84  | 1349.67 | 15.5 | 0.053    | R | SSNVAFAILGD<br>QK                   | L |
| KGT41442.1 | cell division protein FtsL [Bacillus cereus]     | 24  | 13653 | 290  | 645.397 | 644.39  | 23.6 | 0.027    | M | TNLAVK                              | Y |
| KGT41495.1 | dihydrolipoamide dehydrogenase [Bacillus cereus] | 240 | 49593 | 188  | 611.286 | 1220.56 | 58.3 | 4.50E-06 | R | GIIEIDEQCR                          | T |
| KGT41495.1 | dihydrolipoamide dehydrogenase [Bacillus cereus] | 240 | 49593 | 290  | 678.335 | 1354.66 | 41.3 | 0.00013  | R | GEAYFVDANTL<br>R                    | V |
| KGT41495.1 | dihydrolipoamide dehydrogenase [Bacillus cereus] | 240 | 49593 | 355  | 752.853 | 1503.69 | 60.1 | 4.20E-06 | R | VMTEDAAQTY<br>TFK                   | N |
| KGT41495.1 | dihydrolipoamide dehydrogenase [Bacillus cereus] | 240 | 49593 | 414  | 818.891 | 1635.77 | 26.7 | 0.01     | K | ANLGGVCLNV<br>GCIPSK                | A |
| KGT41495.1 | dihydrolipoamide dehydrogenase [Bacillus cereus] | 240 | 49593 | 442  | 867.973 | 1733.93 | 67.1 | 7.30E-07 | R | ALSLNSTDGFL<br>QLVTR                | K |
| KGT41495.1 | dihydrolipoamide dehydrogenase [Bacillus cereus] | 246 | 49593 | 76   | 493.802 | 985.59  | 22.9 | 0.016    | K | LTGGVEGLLK                          | G |
| KGT41495.1 | dihydrolipoamide dehydrogenase [Bacillus cereus] | 246 | 49593 | 377  | 769.944 | 1537.87 | 9.86 | 0.21     | R | VINSTGALSLEI<br>PK                  | K |
| KGT41495.1 | dihydrolipoamide dehydrogenase [Bacillus cereus] | 246 | 49593 | 422  | 556.639 | 1666.89 | 12.8 | 0.22     | R | RPNTQEIGLEQ<br>VGVK                 | M |

|            |                                                                                 |     |       |      |         |         |      |          |   |                            |   |
|------------|---------------------------------------------------------------------------------|-----|-------|------|---------|---------|------|----------|---|----------------------------|---|
| KGT41495.1 | dihydrolipoamide dehydrogenase<br>[Bacillus cereus]                             | 246 | 49593 | 434  | 857.978 | 1713.94 | 16.7 | 0.07     | K | NAVLATGSTPIE<br>IPGFK      | Y |
| KGT41495.1 | dihydrolipoamide dehydrogenase<br>[Bacillus cereus]                             | 246 | 49593 | 549  | 729.411 | 2185.21 | 13   | 0.068    | R | TNVPNIYAIGDI<br>VPGPPLAHK  | A |
| KGT41496.1 | branched-chain alpha-keto acid<br>dehydrogenase subunit E2 [Bacillus<br>cereus] | 36  | 45930 | 1103 | 714.861 | 1427.71 | 35.7 | 0.00045  | K | AQPIPAGEYPE<br>TR          | E |
| KGT41496.1 | branched-chain alpha-keto acid<br>dehydrogenase subunit E2 [Bacillus<br>cereus] | 36  | 45930 | 1599 | 670.371 | 2008.09 | 7.74 | 0.46     | K | NGEIVAAPVLA<br>LSLSFDHR    | L |
| KGT41529.1 | 5-<br>methyltetrahydropteroyltriglutamat<br>e--homocysteine methyltransferase   | 34  | 87398 | 668  | 570.326 | 1138.64 | 34.2 | 0.00069  | R | VIQVDEPALR                 | E |
| KGT41550.1 | acetyl-CoA acetyltransferase<br>[Bacillus cereus]                               | 33  | 42042 | 905  | 576.853 | 1151.69 | 32.9 | 0.00051  | R | ITVSLIHELK                 | R |
| KGT41550.1 | acetyl-CoA acetyltransferase<br>[Bacillus cereus]                               | 33  | 42042 | 587  | 484.248 | 966.481 | 1.34 | 4.3      | K | QHRWGQR                    | L |
| KGT41550.1 | acetyl-CoA acetyltransferase<br>[Bacillus cereus]                               | 74  | 42042 | 618  | 556.318 | 1110.62 | 51.3 | 1.60E-05 | K | IMGIGPAPAIR<br>IVGYSVAGVDP | K |
| KGT41550.1 | acetyl-CoA acetyltransferase<br>[Bacillus cereus]                               | 74  | 42042 | 767  | 602.833 | 1203.65 | 39.5 | 0.0003   | R | K                          | I |
| KGT41550.1 | acetyl-CoA acetyltransferase<br>[Bacillus cereus]                               | 74  | 42042 | 802  | 409.558 | 1225.65 | 2.55 | 1.8      | - | MHNVVITAAV<br>R            | S |
| KGT41550.1 | acetyl-CoA acetyltransferase<br>[Bacillus cereus]                               | 74  | 42042 | 1536 | 955.005 | 1907.99 | 4.17 | 0.41     | K | AIESGYFDDQIV<br>PITIK      | E |
| KGT41550.1 | acetyl-CoA acetyltransferase<br>[Bacillus cereus]                               | 74  | 42042 | 1575 | 977.009 | 1952    | 12.7 | 0.065    | R | TAALAAGFPDT<br>VTGYTIQR    | Q |
| KGT41550.1 | acetyl-CoA acetyltransferase<br>[Bacillus cereus]                               | 108 | 42042 | 218  | 903.524 | 1805.03 | 35.2 | 0.00031  | K | NVTPVELAVPV<br>LQEAVK      | R |
| KGT41550.1 | acetyl-CoA acetyltransferase<br>[Bacillus cereus]                               | 108 | 42042 | 247  | 654.72  | 1961.14 | 51.6 | 6.90E-06 | K | NVTPVELAVPV<br>LQEAVKR     | G |
| KGT41568.1 | hypothetical protein IY08_20415<br>[Bacillus cereus]                            | 34  | 13334 | 1703 | 726.313 | 1450.61 | 33.7 | 0.00047  | K | YDFEPEFEYGR                | D |

|            |                                                                       |    |       |      |         |         |      |           |                              |   |
|------------|-----------------------------------------------------------------------|----|-------|------|---------|---------|------|-----------|------------------------------|---|
| KGT41568.1 | hypothetical protein IY08_20415<br>[Bacillus cereus]                  | 34 | 13334 | 2902 | 783.338 | 2346.99 | 0.79 | 1.4 K     | FDEMIDTVQRA<br>TCMQINER      | Q |
| KGT41575.1 | phosphoenolpyruvate-protein<br>phosphotransferase [Bacillus cereus]   | 38 | 62819 | 893  | 642.296 | 1282.58 | 37.6 | 0.00065 R | LCLDEQDVFR                   | T |
| KGT41575.1 | phosphoenolpyruvate-protein<br>phosphotransferase [Bacillus cereus]   | 39 | 62819 | 671  | 571.769 | 1141.52 | 10.2 | 0.35 K    | EMNPFLGYR                    | A |
| KGT41575.1 | phosphoenolpyruvate-protein<br>phosphotransferase [Bacillus cereus]   | 39 | 62819 | 722  | 587.807 | 1173.6  | 16.5 | 0.079 K   | SITNEAAEIAR                  | L |
| KGT41575.1 | phosphoenolpyruvate-protein<br>phosphotransferase [Bacillus cereus]   | 39 | 62819 | 927  | 652.347 | 1302.68 | 2.41 | 3.8 K     | KSITNEAAEIAR<br>TLNIQGIAASSG | L |
| KGT41575.1 | phosphoenolpyruvate-protein<br>phosphotransferase [Bacillus cereus]   | 39 | 62819 | 1311 | 814.475 | 1626.94 | 17.4 | 0.018 M   | IAIAK<br>NVKQAEENA           | A |
| KGT41610.1 | membrane protein [Bacillus cereus]                                    | 16 | 24593 | 2032 | 788.398 | 1574.78 | 10.4 | 0.21 K    | VQSK<br>AGEVYDIAVSN          | Q |
| KGT41610.1 | membrane protein [Bacillus cereus]<br>hypothetical protein IY08_20665 | 16 | 24593 | 2226 | 839.926 | 1677.84 | 16.2 | 0.032 K   | GANVAK                       | G |
| KGT41616.1 | [Bacillus cereus]<br>zinc finger domain-containing                    | 18 | 27648 | 491  | 421.231 | 840.448 | 17.6 | 0.045 K   | HEFIPAK                      | E |
| KGT41636.1 | protein [Bacillus cereus]<br>zinc finger domain-containing            | 30 | 7509  | 539  | 461.261 | 920.506 | 30.4 | 0.0033 K  | GKFESVVR<br>VQIKVNDNGSF      | A |
| KGT41636.1 | protein [Bacillus cereus]<br>6,7-dimethyl-8-ribityllumazine           | 30 | 7509  | 1498 | 689.361 | 1376.71 | 1.47 | 0.73 K    | R<br>MVFEGLVGT               | V |
| KGT41640.1 | synthase [Bacillus cereus]<br>6,7-dimethyl-8-ribityllumazine          | 24 | 16284 | 1528 | 694.373 | 1386.73 | 24.1 | 0.0055 -  | GLK                          | V |
| KGT41640.1 | synthase [Bacillus cereus]<br>2~, 3~-cyclic nucleotide 2~-            | 32 | 16284 | 1323 | 660.882 | 1319.75 | 15.2 | 0.058 K   | YDAVITLGTVIR<br>YDVISLGNHEF  | G |
| KGT41650.1 | phosphodiesterase [Bacillus cereus]<br>2~, 3~-cyclic nucleotide 2~-   | 39 | 85058 | 2916 | 792.049 | 2373.13 | 39   | 0.00022 K | NYGLDYLNK                    | V |
| KGT41650.1 | phosphodiesterase [Bacillus cereus]<br>2~, 3~-cyclic nucleotide 2~-   | 42 | 85058 | 902  | 576.332 | 1150.65 | 1.21 | 1.8 R     | QIIVKYMQK<br>APINSYFSLVQD    | I |
| KGT41650.1 | phosphodiesterase [Bacillus cereus]                                   | 42 | 85058 | 3019 | 878.789 | 2633.35 | 19.7 | 0.044 K   | DPSVQIVTNAQ<br>K             | W |

|            |                                                                           |     |       |      |         |         |      |          |   |                              |   |
|------------|---------------------------------------------------------------------------|-----|-------|------|---------|---------|------|----------|---|------------------------------|---|
| KGT41650.1 | 2~, 3~-cyclic nucleotide 2~-phosphodiesterase [Bacillus cereus]           | 42  | 85058 | 3057 | 923.156 | 2766.45 | 2.32 | 1.8      | K | KTEEQPLVNIGY<br>PTYNFDILDGLK | Y |
| KGT41687.1 | branched-chain alpha-keto acid dehydrogenase subunit E2 [Bacillus cereus] | 23  | 47463 | 240  | 616.404 | 615.396 | 23.3 | 0.033    | R | KDILK                        | L |
| KGT41687.1 | branched-chain alpha-keto acid dehydrogenase subunit E2 [Bacillus cereus] | 57  | 47463 | 1001 | 677.872 | 1353.73 | 41   | 0.00027  | K | LVESGNIPQAG<br>AAK           | K |
| KGT41687.1 | branched-chain alpha-keto acid dehydrogenase subunit E2 [Bacillus cereus] | 57  | 47463 | 1846 | 826.783 | 2477.33 | 34.2 | 0.0013   | K | VEAAKPVSVPT<br>MPGDIEIPVTG   | K |
| KGT41688.1 | 2-oxoisovalerate dehydrogenase [Bacillus cereus]                          | 27  | 35876 | 1127 | 726.323 | 1450.63 | 26.6 | 0.0031   | R | VR<br>SNNDWTCPTVI            | A |
| KGT41688.1 | 2-oxoisovalerate dehydrogenase [Bacillus cereus]                          | 33  | 35876 | 1216 | 765.896 | 1529.78 | 20.4 | 0.012    | K | R<br>GEVPEDDYVLPI            | A |
| KGT41688.1 | 2-oxoisovalerate dehydrogenase [Bacillus cereus]                          | 33  | 35876 | 1464 | 910.434 | 1818.85 | 4.22 | 1.5      | R | GK<br>LAGPDVPAMP             | F |
| KGT41688.1 | 2-oxoisovalerate dehydrogenase [Bacillus cereus]                          | 121 | 35876 | 647  | 507.954 | 1520.84 | 42.5 | 0.00012  | K | YAPTMEK<br>LAQDGISAHILD      | T |
| KGT41688.1 | 2-oxoisovalerate dehydrogenase [Bacillus cereus]                          | 121 | 35876 | 807  | 583.325 | 1746.95 | 83.8 | 1.20E-08 | R | LR<br>TVYPLDKEAIE            | T |
| KGT41688.1 | 2-oxoisovalerate dehydrogenase [Bacillus cereus]                          | 129 | 35876 | 640  | 754.841 | 1507.67 | 13.3 | 0.15     | K | AASK<br>ATHGLYDQFGE          | A |
| KGT41688.1 | 2-oxoisovalerate dehydrogenase [Bacillus cereus]                          | 129 | 35876 | 903  | 629.017 | 1884.03 | 17.4 | 0.055    | R | DR<br>LIKGEVPEDDYV           | A |
| KGT41688.1 | 2-oxoisovalerate dehydrogenase [Bacillus cereus]                          | 129 | 35876 | 1329 | 718.354 | 2869.39 | 19.9 | 0.014    | R | LPIGK<br>APFGGGVHGA          | I |
| KGT41690.1 | dihydrolipoamide dehydrogenase [Bacillus cereus]                          | 85  | 50880 | 2570 | 993.509 | 1985    | 76.1 | 1.00E-07 | R | LYHSQSVEAMF<br>ANQPGLK       | G |
| KGT41690.1 | dihydrolipoamide dehydrogenase [Bacillus cereus]                          | 85  | 50880 | 1517 | 692.844 | 1383.67 | 2.45 | 1.2      | K | QANTQNIGLEN<br>TDIVVEK       | C |

|            |                                 |     |       |      |         |         |      |            |              |   |
|------------|---------------------------------|-----|-------|------|---------|---------|------|------------|--------------|---|
|            | dihydrolipoamide dehydrogenase  |     |       |      |         |         |      |            | ALVYGESDGFV  |   |
| KGT41690.1 | [Bacillus cereus]               | 78  | 50880 | 234  | 642.827 | 1283.64 | 39.1 | 0.00057 K  | K            | L |
|            | dihydrolipoamide dehydrogenase  |     |       |      |         |         |      |            | GYIQTNEFYQT  |   |
| KGT41690.1 | [Bacillus cereus]               | 78  | 50880 | 349  | 746.36  | 1490.71 | 58   | 6.40E-06 K | K            | E |
|            | dihydrolipoamide dehydrogenase  |     |       |      |         |         |      |            |              |   |
| KGT41690.1 | [Bacillus cereus]               | 84  | 50880 | 81   | 503.273 | 1004.53 | 24.3 | 0.021 K    | IDVFEGIGR    | I |
|            | dihydrolipoamide dehydrogenase  |     |       |      |         |         |      |            |              |   |
| KGT41690.1 | [Bacillus cereus]               | 84  | 50880 | 292  | 679.364 | 1356.71 | 3.92 | 2.1 K      | TILPLEDQDVSK | E |
|            | dihydrolipoamide dehydrogenase  |     |       |      |         |         |      |            | TALVEKENLGG  |   |
| KGT41690.1 | [Bacillus cereus]               | 84  | 50880 | 447  | 586.966 | 1757.87 | 8.81 | 0.78 K     | TCLHK        | G |
|            | dihydrolipoamide dehydrogenase  |     |       |      |         |         |      |            | TILPLEDQDVSK |   |
| KGT41690.1 | [Bacillus cereus]               | 84  | 50880 | 486  | 634.664 | 1900.97 | 16.1 | 0.14 K     | EMQR         | L |
|            | leucine dehydrogenase [Bacillus |     |       |      |         |         |      |            | NAAAGLNLGG   |   |
| KGT41692.1 | cereus]                         | 213 | 40025 | 545  | 528.796 | 1055.58 | 66.2 | 8.00E-07 K | AK           | T |
| KGT41692.1 | leucine dehydrogenase [Bacillus | 213 | 40025 | 688  | 576.286 | 1150.56 | 55.9 | 1.20E-05 R | DGIATYVAADR  | L |
| KGT41692.1 | leucine dehydrogenase [Bacillus | 213 | 40025 | 733  | 590.78  | 1179.55 | 54.9 | 1.30E-05 K | EAFGTDNLEGK  | V |
|            | leucine dehydrogenase [Bacillus |     |       |      |         |         |      |            | AIIAIHDTTLGP |   |
| KGT41692.1 | cereus]                         | 213 | 40025 | 1424 | 593.005 | 1775.99 | 32   | 0.00092 K  | ALGGTR       | M |
|            | leucine dehydrogenase [Bacillus |     |       |      |         |         |      |            | MWTYDSEEAAL  |   |
| KGT41692.1 | cereus]                         | 213 | 40025 | 1532 | 950.424 | 1898.83 | 25.4 | 0.0073 R   | EDALR        | L |
|            |                                 |     |       |      |         |         |      |            | HGDIIHEMGIV  |   |
|            |                                 |     |       |      |         |         |      |            | YAPDYVINAGG  |   |
|            | leucine dehydrogenase [Bacillus |     |       |      |         |         |      |            | VINVADELYGY  |   |
| KGT41692.1 | cereus]                         | 213 | 40025 | 2082 | 966.731 | 3862.9  | 52.4 | 2.30E-05 R | NR           | E |
| KGT41692.1 | leucine dehydrogenase [Bacillus | 222 | 40025 | 354  | 435.756 | 869.497 | 12.7 | 0.1 K      | TVIIGDPR     | K |
| KGT41692.1 | leucine dehydrogenase [Bacillus | 222 | 40025 | 386  | 458.276 | 914.537 | 20.2 | 0.063 K    | LIVTDINK     | E |
| KGT41692.1 | leucine dehydrogenase [Bacillus | 222 | 40025 | 636  | 557.814 | 1113.61 | 19.9 | 0.042 K    | VIAGSANNQLK  | E |
| KGT41692.1 | leucine dehydrogenase [Bacillus | 222 | 40025 | 665  | 569.804 | 1137.59 | 9.06 | 0.58 R     | VESIYDTIAK   | V |
| KGT41692.1 | leucine dehydrogenase [Bacillus | 222 | 40025 | 895  | 642.839 | 1283.66 | 18.7 | 0.061 M    | TLEIFEYLEK   | Y |
| KGT41692.1 | leucine dehydrogenase [Bacillus | 222 | 40025 | 914  | 647.856 | 1293.7  | 23.4 | 0.02 K     | RVESIYDTIAK  | V |
|            | leucine dehydrogenase [Bacillus |     |       |      |         |         |      |            | VIAVQGVGNV   |   |
| KGT41692.1 | cereus]                         | 222 | 40025 | 1392 | 572.973 | 1715.9  | 6.01 | 0.27 K     | AYHLCK       | H |

|            |                                                |     |       |      |         |         |      |          |   |                                      |   |
|------------|------------------------------------------------|-----|-------|------|---------|---------|------|----------|---|--------------------------------------|---|
| KGT41693.1 | phosphate butyryltransferase [Bacillus cereus] | 21  | 31628 | 1473 | 915.023 | 1828.03 | 20.8 | 0.0083   | K | ADILLVPTIEAG<br>NVLYK                | S |
| KGT41693.1 | phosphate butyryltransferase [Bacillus cereus] | 35  | 31628 | 1070 | 688.732 | 2063.17 | 35.4 | 0.00029  | K | AAIIQNTVEVA<br>QAIGIDLPK             | V |
| KGT41693.1 | phosphate butyryltransferase [Bacillus cereus] | 35  | 31628 | 209  | 520.814 | 1039.61 | 2.7  | 0.72     | K | GNIPTANILK                           | A |
| KGT41693.1 | phosphate butyryltransferase [Bacillus cereus] | 35  | 31628 | 1189 | 775.713 | 2324.12 | 9.92 | 0.12     | K | DCIVDGPLALD<br>NAVSQIAAEHK           | G |
| KGT41693.1 | phosphate butyryltransferase [Bacillus cereus] | 35  | 31628 | 1298 | 885.84  | 2654.5  | 11.3 | 0.073    | K | GIVSDVAGKAD<br>ILLVPTIEAGNV<br>LYK   | S |
| KGT41693.1 | phosphate butyryltransferase [Bacillus cereus] | 35  | 31628 | 1340 | 975.839 | 2924.49 | 13   | 0.22     | K | VAPIAAVEVVN<br>PAMQATIDAA<br>MLTQMNR | R |
| KGT41712.1 | acetyl-CoA carboxylase [Bacillus cereus]       | 73  | 17874 | 3047 | 916.446 | 2746.32 | 59.1 | 7.00E-06 | K | ITSPMVGTFFYSS<br>SSPDTPPYVSV<br>GDR  | V |
| KGT41712.1 | acetyl-CoA carboxylase [Bacillus cereus]       | 73  | 17874 | 1142 | 627.853 | 1253.69 | 7.69 | 0.43     | R | GNEVVAVQAP<br>AAK                    | Q |
| KGT41753.1 | glycine dehydrogenase [Bacillus cereus]        | 40  | 54946 | 2056 | 529.605 | 1585.79 | 28.8 | 0.002    | R | FAGFANIHPLQ<br>DEK                   | T |
| KGT41753.1 | glycine dehydrogenase [Bacillus cereus]        | 47  | 54946 | 586  | 481.25  | 960.485 | 25.1 | 0.023    | R | HYTALSNR                             | N |
| KGT41753.1 | glycine dehydrogenase [Bacillus cereus]        | 47  | 54946 | 719  | 531.764 | 1061.51 | 1.08 | 1        | K | RLDETMAAR                            | K |
| KGT41753.1 | glycine dehydrogenase [Bacillus cereus]        | 47  | 54946 | 2456 | 625.605 | 1873.79 | 2.37 | 0.61     | R | NHGVDSGFYPL<br>GSCTMK                | Y |
| KGT41753.1 | glycine dehydrogenase [Bacillus cereus]        | 146 | 54946 | 909  | 431.864 | 1292.57 | 37.8 | 0.00043  | R | AYHEANGDFN<br>R                      | T |
| KGT41753.1 | glycine dehydrogenase [Bacillus cereus]        | 146 | 54946 | 999  | 677.346 | 1352.68 | 35.1 | 0.0011   | R | LAPFYDLPFDR                          | H |
| KGT41753.1 | glycine dehydrogenase [Bacillus cereus]        | 146 | 54946 | 1281 | 534.938 | 1601.79 | 23.8 | 0.0058   | K | SNENGLVDLED<br>LKR                   | V |
| KGT41753.1 | glycine dehydrogenase [Bacillus cereus]        | 146 | 54946 | 1288 | 805.485 | 1608.95 | 21.9 | 0.0064   | K | ADLIPYLPKPILE<br>K                   | T |

|            |                                            |     |       |      |         |         |      |          |   |                            |   |
|------------|--------------------------------------------|-----|-------|------|---------|---------|------|----------|---|----------------------------|---|
| KGT41753.1 | glycine dehydrogenase [Bacillus cereus]    | 146 | 54946 | 1696 | 716.7   | 2147.08 | 32.3 | 0.00094  | K | EVEENPEVVQE<br>APHTTVIK    | R |
| KGT41753.1 | glycine dehydrogenase [Bacillus cereus]    | 146 | 54946 | 1883 | 861.454 | 2581.34 | 45.1 | 0.00013  | K | VIVPDSAHTN<br>PASATVAGFETI | S |
| KGT41753.1 | glycine dehydrogenase [Bacillus cereus]    | 158 | 54946 | 412  | 472.75  | 943.486 | 12.7 | 0.26     | K | TVK<br>HEFVLSGR            | R |
| KGT41753.1 | glycine dehydrogenase [Bacillus cereus]    | 158 | 54946 | 1060 | 696.359 | 1390.7  | 21.9 | 0.02     | K | NQDQALIFEVS<br>K           | E |
| KGT41753.1 | glycine dehydrogenase [Bacillus cereus]    | 158 | 54946 | 1196 | 504.282 | 1509.82 | 21.2 | 0.025    | R | VKPFYGNFGIN<br>VR          | A |
| KGT41753.1 | glycine dehydrogenase [Bacillus cereus]    | 158 | 54946 | 1352 | 556.29  | 1665.85 | 2.77 | 3.1      | - | MKNQDQALIFE<br>VSK         | E |
| KGT41753.1 | glycine dehydrogenase [Bacillus cereus]    | 158 | 54946 | 1549 | 959.978 | 1917.94 | 1.59 | 0.71     | R | AVTEYAVLNAN<br>YMMRR       | L |
| KGT41753.1 | glycine dehydrogenase [Bacillus cereus]    | 158 | 54946 | 1618 | 510.493 | 2037.94 | 9.53 | 0.48     | K | TENGYHFNYDR<br>PEAIGR      | V |
| KGT41754.1 | glycine dehydrogenase [Bacillus cereus]    | 73  | 49625 | 1199 | 637.841 | 1273.67 | 61.8 | 1.60E-06 | R | LVGQTVDSGD<br>KR           | G |
| KGT41754.1 | glycine dehydrogenase [Bacillus cereus]    | 101 | 49625 | 568  | 539.285 | 1076.56 | 26.5 | 0.0056   | K | NIIGGYDLGR                 | D |
| KGT41754.1 | glycine dehydrogenase [Bacillus cereus]    | 101 | 49625 | 915  | 432.242 | 1293.7  | 26.7 | 0.0089   | K | ILVSSAVHPESR               | A |
| KGT41754.1 | glycine dehydrogenase [Bacillus cereus]    | 101 | 49625 | 1587 | 999.57  | 1997.13 | 38.3 | 0.00024  | K | SLFIVSSNPLSLG<br>ALTPPGK   | F |
| KGT41754.1 | glycine dehydrogenase [Bacillus cereus]    | 101 | 49625 | 1934 | 695.355 | 2777.39 | 32.8 | 0.00083  | K | EYASFLGAGVY<br>DHYAPVIVDHV | S |
| KGT41802.1 | superoxide dismutase [Bacillus cereus]     | 22  | 22650 | 1213 | 508.25  | 1521.73 | 12.5 | 0.067    | K | ISR<br>FGSFDAFKEEF         | A |
| KGT41802.1 | superoxide dismutase [Bacillus cereus]     | 22  | 22650 | 1518 | 941.501 | 1880.99 | 22.2 | 0.031    | K | AK<br>SVEELVANLNE          | T |
| KGT41817.1 | cytochrome C [Bacillus cereus]             | 41  | 12613 | 740  | 537.806 | 1073.6  | 41.3 | 0.00044  | K | VPEAIR<br>DEIKEILSK        | G |
| KGT41839.1 | molecular chaperone DnaK [Bacillus cereus] | 16  | 65786 | 1268 | 651.84  | 1301.67 | 0.68 | 2.8      | K | VDAAEVAKATE<br>AK          | E |

|            |                                                                                             |    |       |      |         |         |      |         |   |                            |   |
|------------|---------------------------------------------------------------------------------------------|----|-------|------|---------|---------|------|---------|---|----------------------------|---|
| KGT41839.1 | molecular chaperone DnaK [Bacillus cereus]                                                  | 16 | 65786 | 1380 | 670.341 | 1338.67 | 16   | 0.031   | K | ASAEAYLGETV<br>TK          | A |
| KGT41839.1 | molecular chaperone DnaK [Bacillus cereus]                                                  | 16 | 65786 | 2027 | 525.281 | 1572.82 | 1.83 | 1.1     | R | QAITNPNTIMS<br>VKR         | H |
| KGT41839.1 | molecular chaperone DnaK [Bacillus cereus]                                                  | 44 | 65786 | 1614 | 678.031 | 2031.07 | 44.2 | 0.00012 | K | DAGFAPSELDK<br>VILVGGSTR   | I |
| KGT41839.1 | molecular chaperone DnaK [Bacillus cereus]                                                  | 44 | 65786 | 602  | 551.795 | 1101.58 | 20   | 0.078   | K | NELEEIRAK                  | K |
| KGT41839.1 | molecular chaperone DnaK [Bacillus cereus]                                                  | 44 | 65786 | 839  | 627.846 | 1253.68 | 12.7 | 0.15    | R | FQLTDLPPAPR<br>KDALQEIVQQL | G |
| KGT41839.1 | molecular chaperone DnaK [Bacillus cereus]                                                  | 44 | 65786 | 1296 | 807.449 | 1612.88 | 5.19 | 1.1     | K | TVK                        | L |
| KGT41871.1 | alkaline phosphatase [Bacillus phenylalanine 4-monooxygenase [Bacillus cereus]              | 20 | 50477 | 498  | 423.717 | 845.418 | 19.8 | 0.028   | R | DQLLNDK<br>LVSGLSEAEQIS    | N |
| KGT41880.1 | ferrichrome ABC transporter substrate-binding protein [Bacillus ferrichrome ABC transporter | 38 | 64526 | 1058 | 694.873 | 1387.73 | 38.3 | 0.00065 | K | R                          | L |
| KGT41945.1 | substrate-binding protein [Bacillus ferrichrome ABC transporter                             | 17 | 35558 | 201  | 513.787 | 1025.56 | 3.69 | 0.98    | K | GEATIPVNP                  | R |
| KGT41945.1 | substrate-binding protein [Bacillus ferrichrome ABC transporter                             | 17 | 35558 | 941  | 964.522 | 1927.03 | 0.38 | 3.4     | K | VAPTVVLETNL<br>EDWRGK      | F |
| KGT41945.1 | substrate-binding protein [Bacillus ABC transporter permease [Bacillus cereus]              | 17 | 35558 | 1098 | 703.738 | 2108.19 | 16.7 | 0.022   | K | VDLEAVTALKP<br>DLIILNNR    | Q |
| KGT41958.1 | ABC transporter permease [Bacillus cereus]                                                  | 20 | 74547 | 443  | 380.201 | 758.387 | 3.02 | 2       | K | LNEDLR                     | K |
| KGT41958.1 | ABC transporter permease [Bacillus cereus]                                                  | 20 | 74547 | 885  | 573.27  | 1144.52 | 20   | 0.021   | K | WFHNIASDR<br>EIQLQVMNQP    | K |
| KGT41958.1 | hypothetical protein IY08_22540 [Bacillus cereus]                                           | 20 | 74547 | 2885 | 1158.55 | 2315.08 | 0.54 | 1       | K | YQFVFNGQK                  | E |
| KGT41977.1 | valine--tRNA ligase [Bacillus cereus]                                                       | 23 | 93098 | 240  | 616.404 | 615.396 | 23.3 | 0.033   | K | KIDIK                      | I |
| KGT41987.1 | valine--tRNA ligase [Bacillus cereus]                                                       | 27 | 1E+05 | 1619 | 709.874 | 1417.73 | 22.5 | 0.03    | R | EIPIADEYVEK<br>ITPAHDPNDFE | D |
| KGT41987.1 | valine--tRNA ligase [Bacillus cereus]                                                       | 27 | 1E+05 | 2229 | 561.267 | 1680.78 | 24.5 | 0.017   | K | VGNR                       | H |



|            |                                                                |     |       |      |         |         |      |          |   |               |   |
|------------|----------------------------------------------------------------|-----|-------|------|---------|---------|------|----------|---|---------------|---|
|            |                                                                |     |       |      |         |         |      |          |   | ELPELNDEFKAE  |   |
|            |                                                                |     |       |      |         |         |      |          |   | ADEAVATLDEL   |   |
| KGT42002.1 | trigger factor [Bacillus cereus]                               | 36  | 47316 | 1911 | 897.116 | 2688.33 | 36   | 0.0012   | K | K             | A |
|            |                                                                |     |       |      |         |         |      |          |   | FGIESLYQDALD  |   |
| KGT42002.1 | trigger factor [Bacillus cereus]                               | 36  | 47316 | 1563 | 968.034 | 1934.05 | 0.62 | 2.2      | R | IILPK         | A |
|            |                                                                |     |       |      |         |         |      |          |   | VKLTEQQLMA    |   |
|            |                                                                |     |       |      |         |         |      |          |   | DLWYQTAGET    |   |
| KGT42023.1 | 5~-nucleotidase [Bacillus cereus]                              | 41  | 31110 | 2944 | 818.417 | 2452.23 | 41   | 0.00014  | K | K             | A |
| KGT42023.1 | 5~-nucleotidase [Bacillus cereus]                              | 41  | 31110 | 771  | 546.794 | 1091.57 | 2.2  | 0.87     | K | EHILLQDPK     | E |
| KGT42029.1 | succinate dehydrogenase [Bacillus cereus]                      | 45  | 66127 | 745  | 540.272 | 1078.53 | 44.7 | 0.0002   | R | TEEGLLDFR     | R |
| KGT42029.1 | succinate dehydrogenase [Bacillus cereus]                      | 29  | 66127 | 418  | 477.275 | 952.534 | 10.4 | 0.17     | R | HEVAGLVTK     | Y |
|            |                                                                |     |       |      |         |         |      |          |   | AAEAGVNVLEF   |   |
| KGT42029.1 | succinate dehydrogenase [Bacillus cereus]                      | 29  | 66127 | 1531 | 633.7   | 1898.08 | 18.2 | 0.015    | K | SLVPVKR       | S |
|            |                                                                |     |       |      |         |         |      |          |   | FEGEGNAPAFH   |   |
| KGT42029.1 | succinate dehydrogenase [Bacillus cereus]                      | 29  | 66127 | 1893 | 651.823 | 2603.26 | 27.2 | 0.011    | K | YEDVDISLIKPR  | K |
|            |                                                                |     |       |      |         |         |      |          |   | VADYGIVGDLF   |   |
| KGT42034.1 | electron transfer flavoprotein subunit alpha [Bacillus cereus] | 43  | 34474 | 1882 | 861.138 | 2580.39 | 43   | 0.00011  | K | EVVPLLTEEFKK  | L |
|            |                                                                |     |       |      |         |         |      |          |   | SGDVSSITVDV   |   |
| KGT42034.1 | electron transfer flavoprotein subunit alpha [Bacillus cereus] | 43  | 34474 | 771  | 603.814 | 1205.61 | 9.83 | 0.28     | R | K             | D |
|            |                                                                |     |       |      |         |         |      |          |   | SEEGFKPLKELA  |   |
|            |                                                                |     |       |      |         |         |      |          |   | DVLGGAVGAS    |   |
| KGT42034.1 | electron transfer flavoprotein subunit alpha [Bacillus cereus] | 43  | 34474 | 1801 | 777.42  | 2329.24 | 11.8 | 0.24     | K | R             | G |
| KGT42036.1 | enoyl-CoA hydratase [Bacillus cereus]                          | 14  | 28049 | 91   | 516.306 | 515.299 | 13.6 | 0.043    | K | QIAGK         | S |
|            |                                                                |     |       |      |         |         |      |          |   | ILTDNSLALQVT  |   |
| KGT42040.1 | substrate-binding protein [Bacillus cereus]                    | 38  | 36034 | 1615 | 708.412 | 1414.81 | 37.7 | 0.00037  | R | K             | K |
|            |                                                                |     |       |      |         |         |      |          |   | DITGFVLGGHG   |   |
| KGT42105.1 | malate dehydrogenase [Bacillus cereus]                         | 102 | 33477 | 2578 | 666.677 | 1997.01 | 66.8 | 8.10E-07 | K | DDMVPLVR      | Y |
|            |                                                                |     |       |      |         |         |      |          |   | VIGQSGVLDTA   |   |
| KGT42105.1 | malate dehydrogenase [Bacillus cereus]                         | 47  | 33477 | 786  | 608.342 | 1214.67 | 47.2 | 0.00011  | R | R             | F |
|            |                                                                |     |       |      |         |         |      |          |   | IIELELLADEKEA |   |
| KGT42105.1 | malate dehydrogenase [Bacillus cereus]                         | 47  | 33477 | 1506 | 624.018 | 1869.03 | 17.7 | 0.046    | K | LDR           | S |

|            |                                                     |     |       |      |         |         |      |          |   |              |   |
|------------|-----------------------------------------------------|-----|-------|------|---------|---------|------|----------|---|--------------|---|
| KGT42105.1 | malate dehydrogenase [Bacillus cereus]              | 47  | 33477 | 1584 | 997.046 | 1992.08 | 18.2 | 0.044    | K | ELADVVLVDIP  |   |
| KGT42105.1 | malate dehydrogenase [Bacillus cereus]              | 44  | 33477 | 522  | 681.88  | 1361.75 | 13.3 | 0.17     | R | QLENPTK      | G |
| KGT42112.1 | pyruvate kinase [Bacillus cereus]                   | 41  | 62321 | 665  | 515.797 | 1029.58 | 40.8 | 0.00032  | R | TFIAQELNLSVK | D |
| KGT42112.1 | pyruvate kinase [Bacillus cereus]                   | 44  | 62321 | 1130 | 729.388 | 1456.76 | 44.3 | 0.00018  | K | KASDVLEIR    | E |
| KGT42112.1 | pyruvate kinase [Bacillus cereus]                   | 44  | 62321 | 652  | 562.813 | 1123.61 | 17.5 | 0.048    | K | SPIVAVTSDEQ  |   |
| KGT42113.1 | 6-phosphofructokinase [Bacillus cereus]             | 46  | 34411 | 783  | 858.444 | 1714.87 | 46   | 6.70E-05 | R | VGR          | R |
| KGT42135.1 | alanine dehydrogenase [Bacillus cereus]             | 180 | 40086 | 500  | 512.335 | 1022.66 | 23.7 | 0.0043   | K | VDFIAASFVR   | K |
| KGT42135.1 | alanine dehydrogenase [Bacillus cereus]             | 180 | 40086 | 881  | 638.832 | 1275.65 | 28.1 | 0.0024   | R | IGVLTSGGDSP  |   |
| KGT42135.1 | alanine dehydrogenase [Bacillus cereus]             | 180 | 40086 | 1008 | 679.376 | 1356.74 | 32.3 | 0.0028   | K | GMNAAIR      | A |
| KGT42135.1 | alanine dehydrogenase [Bacillus cereus]             | 180 | 40086 | 1129 | 728.895 | 1455.78 | 47.9 | 7.20E-05 | R | GILLAGVPGVK  | R |
| KGT42135.1 | alanine dehydrogenase [Bacillus cereus]             | 180 | 40086 | 1258 | 789.908 | 1577.8  | 54   | 1.20E-05 | K | QLDDIFGNQVK  | T |
| KGT42135.1 | alanine dehydrogenase [Bacillus cereus]             | 180 | 40086 | 1714 | 728.741 | 2183.2  | 74.8 | 5.50E-08 | R | VTIIGGGQAGT  |   |
| KGT42135.1 | alanine dehydrogenase [Bacillus cereus]             | 192 | 40086 | 945  | 659.311 | 1316.61 | 18.9 | 0.041    | K | NAAK         | I |
| KGT42135.1 | alanine dehydrogenase [Bacillus cereus]             | 192 | 40086 | 951  | 659.819 | 1317.62 | 20   | 0.044    | R | SLPLLAPMSEV  |   |
| KGT42135.1 | alanine dehydrogenase [Bacillus cereus]             | 192 | 40086 | 959  | 661.851 | 1321.69 | 26   | 0.012    | R | AGR          | M |
| KGT42135.1 | alanine dehydrogenase [Bacillus cereus]             | 192 | 40086 | 1659 | 1052.59 | 2103.17 | 15.9 | 0.036    | R | VASIAYETVQLD |   |
| KGT42280.1 | phosphoenolpyruvate carboxykinase [Bacillus cereus] | 60  | 58099 | 968  | 590.317 | 1178.62 | 60.2 | 2.30E-06 | K | NR           | S |
| KGT42280.1 | phosphoenolpyruvate carboxykinase [Bacillus cereus] | 555 | 58099 | 353  | 435.712 | 869.41  | 46.1 | 7.20E-05 | R | EGLILFTYLHLA |   |
| KGT42280.1 | phosphoenolpyruvate carboxykinase [Bacillus cereus] | 555 | 58099 | 514  | 517.78  | 1033.55 | 30.2 | 0.0029   | K | PEPELTK      | A |
| KGT42280.1 | phosphoenolpyruvate carboxykinase [Bacillus cereus] | 555 | 58099 | 514  | 517.78  | 1033.55 | 30.2 | 0.0029   | K | EPVASEYGYFR  | E |
| KGT42280.1 | phosphoenolpyruvate carboxykinase [Bacillus cereus] | 555 | 58099 | 514  | 517.78  | 1033.55 | 30.2 | 0.0029   | K | ITTHDNPTYEK  | H |
| KGT42280.1 | phosphoenolpyruvate carboxykinase [Bacillus cereus] | 555 | 58099 | 514  | 517.78  | 1033.55 | 30.2 | 0.0029   | K | MAAQIGAQFL   |   |
| KGT42280.1 | phosphoenolpyruvate carboxykinase [Bacillus cereus] | 555 | 58099 | 514  | 517.78  | 1033.55 | 30.2 | 0.0029   | K | EK           | N |
| KGT42280.1 | phosphoenolpyruvate carboxykinase [Bacillus cereus] | 555 | 58099 | 514  | 517.78  | 1033.55 | 30.2 | 0.0029   | K | TSTLALTNTVTP |   |
| KGT42280.1 | phosphoenolpyruvate carboxykinase [Bacillus cereus] | 555 | 58099 | 514  | 517.78  | 1033.55 | 30.2 | 0.0029   | K | YAVQIANK     | G |
| KGT42280.1 | phosphoenolpyruvate carboxykinase [Bacillus cereus] | 555 | 58099 | 514  | 517.78  | 1033.55 | 30.2 | 0.0029   | K | LTSTGAVSAST  |   |
| KGT42280.1 | phosphoenolpyruvate carboxykinase [Bacillus cereus] | 555 | 58099 | 514  | 517.78  | 1033.55 | 30.2 | 0.0029   | K | GK           | Y |
| KGT42280.1 | phosphoenolpyruvate carboxykinase [Bacillus cereus] | 555 | 58099 | 514  | 517.78  | 1033.55 | 30.2 | 0.0029   | K | MNLGYTR      | A |
| KGT42280.1 | phosphoenolpyruvate carboxykinase [Bacillus cereus] | 555 | 58099 | 514  | 517.78  | 1033.55 | 30.2 | 0.0029   | K | AIELANEFK    | A |

|            |                                                              |     |       |      |         |         |      |          |   |                                          |   |
|------------|--------------------------------------------------------------|-----|-------|------|---------|---------|------|----------|---|------------------------------------------|---|
| KGT42280.1 | phosphoenolpyruvate carboxykinase<br>[Bacillus cereus]       | 555 | 58099 | 603  | 551.801 | 1101.59 | 30.6 | 0.0023   | K | TTLSADPNRK                               | L |
| KGT42280.1 | phosphoenolpyruvate carboxykinase<br>[Bacillus cereus]       | 555 | 58099 | 716  | 390.214 | 1167.62 | 26.8 | 0.0085   | K | EKEELFVFK                                | G |
| KGT42280.1 | phosphoenolpyruvate carboxykinase<br>[Bacillus cereus]       | 555 | 58099 | 964  | 665.856 | 1329.7  | 40.4 | 0.0005   | R | AMIQAALNGEL<br>AK                        | T |
| KGT42280.1 | phosphoenolpyruvate carboxykinase<br>[Bacillus cereus]       | 555 | 58099 | 1165 | 740.89  | 1479.77 | 23.9 | 0.0057   | R | IVLIGGTEYAGE<br>MK                       | K |
| KGT42280.1 | phosphoenolpyruvate carboxykinase<br>[Bacillus cereus]       | 555 | 58099 | 1305 | 813.887 | 1625.76 | 87.1 | 8.70E-09 | R | IADYNDTTLTE<br>NTR                       | A |
| KGT42280.1 | phosphoenolpyruvate carboxykinase<br>[Bacillus cereus]       | 555 | 58099 | 1422 | 887.966 | 1773.92 | 38.7 | 0.00023  | K | KFDSVSEDIINL<br>GGPIA                    | - |
| KGT42280.1 | phosphoenolpyruvate carboxykinase<br>[Bacillus cereus]       | 555 | 58099 | 1430 | 892.456 | 1782.9  | 64.3 | 9.40E-07 | K | VFLVNTGWTG<br>GEYGVGK                    | R |
| KGT42280.1 | phosphoenolpyruvate carboxykinase<br>[Bacillus cereus]       | 555 | 58099 | 2029 | 821.914 | 3283.63 | 29.7 | 0.0055   | K | HDIFGLEVPLH<br>VPGVPDEVLM<br>PEQTWADK    | A |
| KGT42280.1 | phosphoenolpyruvate carboxykinase<br>[Bacillus cereus]       | 555 | 58099 | 2077 | 919.718 | 3674.84 | 62.1 | 1.90E-06 | K | CVNLSHEKEPQ<br>IFDAITFGSVLE<br>NVIINDQTR | I |
| KGT42280.1 | phosphoenolpyruvate carboxykinase<br>[Bacillus cereus]       | 560 | 58099 | 1302 | 542.294 | 1623.86 | 14.8 | 0.12     | R | IVLIGGTEYAGE<br>MKK                      | S |
| KGT42280.1 | phosphoenolpyruvate carboxykinase<br>[Bacillus cereus]       | 560 | 58099 | 1364 | 559.923 | 1676.75 | 2.73 | 2        | K | EQAMYHFLSGY<br>TSK                       | L |
| KGT42280.1 | phosphoenolpyruvate carboxykinase<br>[Bacillus cereus]       | 560 | 58099 | 1923 | 907.118 | 2718.33 | 5.24 | 0.39     | K | EPQIFDAITFGS<br>VLENIINDQTR              | I |
| KGT42294.1 | spermidine/putrescine ABC<br>transporter ATP-binding protein | 25  | 28968 | 68   | 456.235 | 910.455 | 25.2 | 0.011    | - | MSFLQIR                                  | N |
| KGT42371.1 | hypothetical protein IY08_24605<br>[Bacillus cereus]         | 28  | 28019 | 1493 | 688.383 | 1374.75 | 27.9 | 0.0064   | K | IIPVDLTEYQGK                             | V |
| KGT42381.1 | lactate dehydrogenase [Bacillus<br>cereus]                   | 72  | 34691 | 724  | 588.815 | 1175.62 | 72.4 | 1.90E-07 | R | VIGSGTTLDSAR                             | F |

|            |                                     |     |       |      |         |         |      |          |   |              |   |
|------------|-------------------------------------|-----|-------|------|---------|---------|------|----------|---|--------------|---|
| KGT42398.1 | chitinase [Bacillus cereus]         | 82  | 39538 | 1276 | 653.279 | 1304.54 | 37.6 | 0.00017  | K | NNFEFSNNYR   | T |
|            |                                     |     |       |      |         |         |      |          |   | GLMSWSINWD   |   |
| KGT42398.1 | chitinase [Bacillus cereus]         | 82  | 39538 | 1636 | 712.335 | 1422.66 | 36.3 | 0.0012   | R | AK           | N |
|            |                                     |     |       |      |         |         |      |          |   | VVLSIGGQNGV  |   |
| KGT42398.1 | chitinase [Bacillus cereus]         | 82  | 39538 | 2568 | 991.554 | 1981.09 | 29.8 | 0.0019   | K | VLLPDNASK    | Q |
|            |                                     |     |       |      |         |         |      |          |   | KVLSIGGQNG   |   |
| KGT42398.1 | chitinase [Bacillus cereus]         | 82  | 39538 | 2681 | 703.737 | 2108.19 | 24.6 | 0.0042   | K | VVLLPDNASK   | Q |
|            |                                     |     |       |      |         |         |      |          |   | WDVINVSFGET  |   |
| KGT42398.1 | chitinase [Bacillus cereus]         | 67  | 39538 | 744  | 826.391 | 1650.77 | 67.1 | 9.40E-07 | K | GGDR         | S |
| KGT42398.1 | chitinase [Bacillus cereus]         | 67  | 39538 | 322  | 586.292 | 1170.57 | 1.23 | 2.8      | R | TYFDGLSLQK   | - |
| KGT42398.1 | chitinase [Bacillus cereus]         | 67  | 39538 | 390  | 620.31  | 1238.61 | 18   | 0.1      | K | ISNQSGYPAFR  | G |
|            |                                     |     |       |      |         |         |      |          |   | NPTTPQIVNLIS |   |
| KGT42398.1 | chitinase [Bacillus cereus]         | 67  | 39538 | 733  | 818.977 | 1635.94 | 11.9 | 0.064    | K | AIR          | T |
|            |                                     |     |       |      |         |         |      |          |   | LLVGYYWHNFD  |   |
| KGT42398.1 | chitinase [Bacillus cereus]         | 67  | 39538 | 955  | 650.008 | 1947    | 5.59 | 1.8      | K | NGTGIK       | L |
|            |                                     |     |       |      |         |         |      |          |   | STVEFSPVYGT  |   |
| KGT42398.1 | chitinase [Bacillus cereus]         | 67  | 39538 | 1266 | 861.756 | 2582.25 | 15.1 | 0.039    | R | DAEFKSDISYLK | S |
|            |                                     |     |       |      |         |         |      |          |   | SDQVMIGLPAA  |   |
|            |                                     |     |       |      |         |         |      |          |   | PAAAPSGGYIS  |   |
| KGT42398.1 | chitinase [Bacillus cereus]         | 67  | 39538 | 1324 | 935.141 | 2802.4  | 9.29 | 0.64     | R | PTEMKK       | A |
| KGT42398.1 | chitinase [Bacillus cereus]         | 411 | 39538 | 81   | 639.358 | 1276.7  | 48.8 | 6.00E-05 | R | FINSIQSLIDK  | Y |
|            |                                     |     |       |      |         |         |      |          |   | STVEFSPVYGT  |   |
| KGT42398.1 | chitinase [Bacillus cereus]         | 411 | 39538 | 213  | 888.926 | 1775.84 | 82.1 | 2.00E-08 | R | DAEFK        | S |
|            | methionine ABC transporter          |     |       |      |         |         |      |          |   | ELDANYFQGIP  |   |
| KGT42406.1 | substrate-binding protein [Bacillus | 22  | 29774 | 2368 | 892.453 | 1782.89 | 22   | 0.014    | K | FLEK         | E |
|            | iron-uptake system-binding protein  |     |       |      |         |         |      |          |   |              |   |
| KGT42412.1 | [Bacillus cereus]                   | 47  | 35624 | 1258 | 648.33  | 1294.64 | 47.2 | 3.70E-05 | K | IIKDYNSDAEK  | A |
|            | iron-uptake system-binding protein  |     |       |      |         |         |      |          |   |              |   |
| KGT42412.1 | [Bacillus cereus]                   | 56  | 35624 | 247  | 623.341 | 622.334 | 25.3 | 0.014    | K | ISFEK        | L |
|            | iron-uptake system-binding protein  |     |       |      |         |         |      |          |   |              |   |
| KGT42412.1 | [Bacillus cereus]                   | 77  | 35624 | 329  | 590.318 | 1178.62 | 42.5 | 0.00034  | K | YLEKELEGAK   | S |
|            | iron-uptake system-binding protein  |     |       |      |         |         |      |          |   | LRANELFLYPEG |   |
| KGT42412.1 | [Bacillus cereus]                   | 77  | 35624 | 1252 | 849.123 | 2544.35 | 53   | 1.40E-05 | R | VYFNPVIYK    | D |

|            |                                                           |     |       |      |         |         |      |          |   |              |   |
|------------|-----------------------------------------------------------|-----|-------|------|---------|---------|------|----------|---|--------------|---|
| KGT42412.1 | iron-uptake system-binding protein<br>[Bacillus cereus]   | 84  | 35624 | 336  | 592.829 | 1183.64 | 18   | 0.048    | K | DLGLTAPEQLK  | T |
| KGT42412.1 | iron-uptake system-binding protein<br>[Bacillus cereus]   | 84  | 35624 | 937  | 961.481 | 1920.95 | 2.86 | 0.54     | K | VFVNVDPM     | T |
| KGT42412.1 | iron-uptake system-binding protein<br>[Bacillus cereus]   | 84  | 35624 | 1060 | 684.028 | 2049.06 | 4.88 | 0.36     | K | QGGTAWSK     | T |
| KGT42412.1 | iron-uptake system-binding protein<br>[Bacillus cereus]   | 84  | 35624 | 1127 | 714.361 | 2140.06 | 20.7 | 0.021    | K | KVFVNVDPM    | T |
| KGT42412.1 | iron-uptake system-binding protein<br>[Bacillus cereus]   | 84  | 35624 | 1277 | 866.116 | 2595.33 | 20.5 | 0.04     | K | AQGGTAWSK    | T |
| KGT42412.1 | iron-uptake system-binding protein<br>[Bacillus cereus]   | 84  | 35624 | 1355 | 759.938 | 3035.72 | 7.17 | 0.19     | K | VAPTFPVSHVS  | L |
| KGT42412.1 | iron-uptake system-binding protein<br>[Bacillus cereus]   | 193 | 35624 | 243  | 1030.02 | 2058.02 | 47.2 | 3.80E-05 | K | TNWEDNLK     | L |
| KGT42412.1 | iron-uptake system-binding protein<br>[Bacillus cereus]   | 193 | 35624 | 399  | 820.684 | 3278.71 | 27.9 | 0.0044   | K | LAELNPDYIFLQ | V |
| KGT42412.1 | iron-uptake system-binding protein<br>[Bacillus cereus]   | 206 | 35624 | 296  | 1138.59 | 2275.17 | 14.7 | 0.042    | R | YEASENKNPK   | V |
| KGT42412.1 | iron-uptake system-binding protein<br>[Bacillus cereus]   | 206 | 35624 | 317  | 802.764 | 2405.27 | 5.81 | 0.97     | K | IATASLESMED  | Y |
| KGT42417.1 | peptidase T [Bacillus cereus]                             | 24  | 45885 | 194  | 613.369 | 612.362 | 2.61 | 0.55     | K | AAVLGIKPVGAI | E |
| KGT42417.1 | peptidase T [Bacillus cereus]                             | 24  | 45885 | 385  | 458.27  | 914.526 | 24.4 | 0.025    | M | TVGGKLPK     | Y |
| KGT42449.1 | 2-oxoglutarate ferredoxin<br>oxidoreductase subunit alpha | 44  | 64546 | 832  | 626.297 | 1250.58 | 44.1 | 0.00015  | R | VLEEIESNPIWQ | E |
| KGT42449.1 | 2-oxoglutarate ferredoxin<br>oxidoreductase subunit alpha | 52  | 64546 | 457  | 497.231 | 992.447 | 19.2 | 0.039    | R | SMNAAK       | E |
| KGT42449.1 | 2-oxoglutarate ferredoxin<br>oxidoreductase subunit alpha | 52  | 64546 | 501  | 512.746 | 1023.48 | 0.8  | 3.7      | K | MQPNFETLLQL  | F |
| KGT42449.1 | 2-oxoglutarate ferredoxin<br>oxidoreductase subunit alpha | 52  | 64546 | 712  | 584.298 | 1166.58 | 23.6 | 0.024    | R | KPDVITSSTKFP | F |
| KGT42449.1 | 2-oxoglutarate ferredoxin<br>oxidoreductase subunit alpha | 52  | 64546 | 712  | 584.298 | 1166.58 | 23.6 | 0.024    | R | AETAEK       | F |
| KGT42449.1 | 2-oxoglutarate ferredoxin<br>oxidoreductase subunit alpha | 52  | 64546 | 712  | 584.298 | 1166.58 | 23.6 | 0.024    | R | ANELFLYPEGV  | D |
| KGT42449.1 | 2-oxoglutarate ferredoxin<br>oxidoreductase subunit alpha | 52  | 64546 | 712  | 584.298 | 1166.58 | 23.6 | 0.024    | R | YFNPVIYK     | D |
| KGT42449.1 | 2-oxoglutarate ferredoxin<br>oxidoreductase subunit alpha | 52  | 64546 | 712  | 584.298 | 1166.58 | 23.6 | 0.024    | R | MQPNFETLLQL  | F |
| KGT42449.1 | 2-oxoglutarate ferredoxin<br>oxidoreductase subunit alpha | 52  | 64546 | 712  | 584.298 | 1166.58 | 23.6 | 0.024    | R | KPDVITSSTK   | F |
| KGT42449.1 | 2-oxoglutarate ferredoxin<br>oxidoreductase subunit alpha | 52  | 64546 | 712  | 584.298 | 1166.58 | 23.6 | 0.024    | R | IEPVR        | E |
| KGT42449.1 | 2-oxoglutarate ferredoxin<br>oxidoreductase subunit alpha | 52  | 64546 | 712  | 584.298 | 1166.58 | 23.6 | 0.024    | R | KQELIER      | F |
| KGT42449.1 | 2-oxoglutarate ferredoxin<br>oxidoreductase subunit alpha | 52  | 64546 | 712  | 584.298 | 1166.58 | 23.6 | 0.024    | R | YEVTEDGVSPR  | V |
| KGT42449.1 | 2-oxoglutarate ferredoxin<br>oxidoreductase subunit alpha | 52  | 64546 | 712  | 584.298 | 1166.58 | 23.6 | 0.024    | R | GAIEEAMTR    | L |
| KGT42449.1 | 2-oxoglutarate ferredoxin<br>oxidoreductase subunit alpha | 52  | 64546 | 712  | 584.298 | 1166.58 | 23.6 | 0.024    | R | VNMMQLEK     | A |
| KGT42449.1 | 2-oxoglutarate ferredoxin<br>oxidoreductase subunit alpha | 52  | 64546 | 712  | 584.298 | 1166.58 | 23.6 | 0.024    | R | LGYYLYGYR    | H |

|            |                                        |     |       |      |         |         |      |          |               |                |
|------------|----------------------------------------|-----|-------|------|---------|---------|------|----------|---------------|----------------|
|            | 2-oxoglutarate ferredoxin              |     |       |      |         |         |      |          | LIHPFPTAEIDPL |                |
| KGT42449.1 | oxidoreductase subunit alpha           | 52  | 64546 | 1378 | 563.993 | 1688.96 | 17.2 | 0.019    | R             | VK K           |
|            | dihydrodipicolinate synthase           |     |       |      |         |         |      |          |               | TALQMVGLDV     |
| KGT42472.1 | [Bacillus cereus]                      | 44  | 31243 | 1686 | 723.394 | 1444.77 | 44.4 | 8.70E-05 | K             | GSVR L         |
|            | dihydrodipicolinate synthase           |     |       |      |         |         |      |          |               | VTDSLFPASP     |
| KGT42472.1 | [Bacillus cereus]                      | 92  | 31243 | 693  | 795.419 | 1588.82 | 42.8 | 0.00027  | R             | TPVK T         |
|            | dihydrodipicolinate synthase           |     |       |      |         |         |      |          |               |                |
| KGT42472.1 | [Bacillus cereus]                      | 106 | 31243 | 467  | 655.373 | 1308.73 | 16.9 | 0.036    | R             | LPLLPLTEER V   |
|            | dihydrodipicolinate synthase           |     |       |      |         |         |      |          |               | AIAESTPLPVML   |
| KGT42472.1 | [Bacillus cereus]                      | 106 | 31243 | 941  | 964.522 | 1927.03 | 25.2 | 0.011    | K             | YNVPGR S       |
|            | dihydrodipicolinate synthase           |     |       |      |         |         |      |          |               | LPLLPLTEEERV   |
| KGT42472.1 | [Bacillus cereus]                      | 106 | 31243 | 1297 | 883.829 | 2648.46 | 21.7 | 0.012    | R             | TLQSVMQSIPR -  |
| KGT42478.1 | zinc protease [Bacillus cereus]        | 33  | 47073 | 709  | 529.302 | 1056.59 | 32.6 | 0.0028   | R             | NGKNELLR K     |
| KGT42478.1 | zinc protease [Bacillus cereus]        | 33  | 47073 | 946  | 586.316 | 1170.62 | 1.57 | 2.9      | R             | IVMENIPTVR S   |
|            | polynucleotide phosphorylase           |     |       |      |         |         |      |          |               | YGDТАVLSTAT    |
| KGT42480.1 | [Bacillus cereus]                      | 30  | 78303 | 1055 | 692.853 | 1383.69 | 30   | 0.0015   | R             | ASK E          |
|            | polynucleotide phosphorylase           |     |       |      |         |         |      |          |               |                |
| KGT42480.1 | [Bacillus cereus]                      | 30  | 78303 | 608  | 553.304 | 1104.59 | 12   | 0.21     | K             | QVFSIDLAGR Q   |
|            | polynucleotide phosphorylase           |     |       |      |         |         |      |          |               | VAGTAQGVTA     |
| KGT42480.1 | [Bacillus cereus]                      | 30  | 78303 | 1284 | 802.438 | 1602.86 | 0.18 | 4.7      | K             | LQMDIK I       |
|            | polynucleotide phosphorylase           |     |       |      |         |         |      |          |               |                |
| KGT42480.1 | [Bacillus cereus]                      | 18  | 78303 | 127  | 686.876 | 1371.74 | 1.47 | 3.2      | K             | QINKIIEETGVK I |
|            |                                        |     |       |      |         |         |      |          |               | IGVLTVLEGSTD   |
| KGT42499.1 | elongation factor Ts [Bacillus cereus] | 73  | 32551 | 1356 | 837.461 | 1672.91 | 73.3 | 1.60E-07 | R             | EAAAK D        |
| KGT42499.1 | elongation factor Ts [Bacillus cereus] | 73  | 32551 | 365  | 439.756 | 877.497 | 12.8 | 0.18     | R             | RFEIVSK T      |
|            | urocanate hydratase [Bacillus          |     |       |      |         |         |      |          |               | IINEMVANGEL    |
| KGT42536.1 | cereus]                                | 51  | 61042 | 2581 | 1007.04 | 2012.07 | 51.1 | 3.10E-05 | R             | SAPIVIGR D     |
| KGT42536.1 | urocanate hydratase [Bacillus          | 135 | 61042 | 670  | 571.759 | 1141.5  | 34.2 | 0.00084  | R             | ICWLGYGER A    |
|            | urocanate hydratase [Bacillus          |     |       |      |         |         |      |          |               | VLTSDPGMGV     |
| KGT42536.1 | cereus]                                | 135 | 61042 | 828  | 623.827 | 1245.64 | 57.5 | 1.20E-05 | R             | VR H           |
|            | urocanate hydratase [Bacillus          |     |       |      |         |         |      |          |               |                |
| KGT42536.1 | cereus]                                | 135 | 61042 | 906  | 645.333 | 1288.65 | 32.6 | 0.0041   | R             | QQVEFQGLPSR I  |

|            |                                       |     |       |      |         |         |      |          |   |                                   |   |
|------------|---------------------------------------|-----|-------|------|---------|---------|------|----------|---|-----------------------------------|---|
| KGT42536.1 | urocanate hydratase [Bacillus cereus] | 135 | 61042 | 978  | 670.831 | 1339.65 | 37.2 | 0.0005   | K | GAITFDYGNNI<br>R                  | Q |
| KGT42536.1 | urocanate hydratase [Bacillus cereus] | 135 | 61042 | 1723 | 735.439 | 2203.29 | 32.4 | 0.00058  | K | KEPISIGLLGNA<br>AEILPELVK         | R |
| KGT42536.1 | urocanate hydratase [Bacillus cereus] | 135 | 61042 | 1794 | 773.736 | 2318.19 | 25.8 | 0.0038   | R | WVALSGDPEDI<br>YKTDEVILR          | E |
| KGT42536.1 | urocanate hydratase [Bacillus cereus] | 143 | 61042 | 522  | 522.26  | 1042.51 | 18.6 | 0.053    | K | LREEDPER                          | Y |
| KGT42536.1 | urocanate hydratase [Bacillus cereus] | 143 | 61042 | 713  | 584.362 | 1166.71 | 9.17 | 0.12     | R | VLLANSNLVPK<br>NWESYQAIVDS        | W |
| KGT42536.1 | urocanate hydratase [Bacillus cereus] | 143 | 61042 | 1238 | 776.889 | 1551.76 | 4.64 | 1.1      | R | LK                                | T |
| KGT42536.1 | urocanate hydratase [Bacillus cereus] | 143 | 61042 | 1712 | 725.74  | 2174.2  | 5.31 | 0.43     | K | TLESDETLLVQS<br>GKPVAIFK          | S |
| KGT42536.1 | urocanate hydratase [Bacillus cereus] | 143 | 61042 | 1957 | 935.802 | 2804.38 | 26.2 | 0.012    | R | MLMNNLDPEV<br>AEKPEELVVYG<br>GIGR | A |
| KGT42566.1 | transketolase [Bacillus cereus]       | 101 | 72415 | 873  | 637.318 | 1272.62 | 29   | 0.006    | R | VEDGNDIEAIA<br>K                  | A |
| KGT42566.1 | transketolase [Bacillus cereus]       | 101 | 72415 | 1384 | 851.417 | 1700.82 | 27.2 | 0.0028   | K | IMEEYGFTVEN<br>VVR                | K |
| KGT42566.1 | transketolase [Bacillus cereus]       | 101 | 72415 | 1398 | 576.339 | 1726    | 43   | 5.00E-05 | R | LALESTNKPTAL<br>VLTR              | Q |
| KGT42566.1 | transketolase [Bacillus cereus]       | 101 | 72415 | 1664 | 704.034 | 2109.08 | 34.3 | 0.00061  | K | TYGGTFFVFSD<br>YLRPAIR            | L |
| KGT42566.1 | transketolase [Bacillus cereus]       | 101 | 72415 | 1716 | 1098.05 | 2194.09 | 33.2 | 0.003    | R | YVGLEGDVLGI<br>DTFGASAPGEK        | I |
| KGT42566.1 | transketolase [Bacillus cereus]       | 102 | 72415 | 497  | 511.274 | 1020.53 | 12.9 | 0.37     | R | TTIGFGSPNK                        | S |
| KGT42566.1 | transketolase [Bacillus cereus]       | 102 | 72415 | 991  | 673.819 | 1345.62 | 8.38 | 0.52     | R | SFSESVEDRYK                       | A |
| KGT42566.1 | transketolase [Bacillus cereus]       | 102 | 72415 | 1102 | 476.272 | 1425.79 | 10.7 | 0.26     | K | ADEKRPTLIEVR<br>EFAMGAAMN         | T |
| KGT42566.1 | transketolase [Bacillus cereus]       | 102 | 72415 | 1465 | 607.633 | 1819.88 | 14.2 | 0.046    | R | GIALHGGLK                         | T |

|            |                                                              |     |       |      |         |         |      |          |            |                   |
|------------|--------------------------------------------------------------|-----|-------|------|---------|---------|------|----------|------------|-------------------|
|            |                                                              |     |       |      |         |         |      |          | EYAWTAEQD  |                   |
|            |                                                              |     |       |      |         |         |      |          | FHVAEEVDNF |                   |
| KGT42566.1 | transketolase [Bacillus cereus]                              | 102 | 72415 | 1962 | 705.331 | 2817.3  | 6.57 | 0.84     | K          | RK T              |
|            | glutamine synthetase [Bacillus cereus]                       | 135 | 50420 | 1771 | 738.343 | 1474.67 | 56   | 9.00E-06 | K          | MMFDGSSIEGF I     |
| KGT42578.1 | glutamine synthetase [Bacillus cereus]                       | 43  | 50420 | 446  | 492.264 | 982.512 | 27.4 | 0.0061   | K          | LTPPDVDR N        |
| KGT42578.1 | glutamine synthetase [Bacillus cereus]                       | 43  | 50420 | 829  | 623.877 | 1245.74 | 22.9 | 0.0065   | R          | LQFTDLLGVK N      |
|            | glutamine synthetase [Bacillus cereus]                       |     |       |      |         |         |      |          |            | SVDPAANPYLV       |
| KGT42578.1 | glutamine synthetase [Bacillus cereus]                       | 43  | 50420 | 1828 | 800.771 | 2399.29 | 24.5 | 0.0089   | R          | MATLLAAGLD GIK N  |
|            | glutamine synthetase [Bacillus cereus]                       |     |       |      |         |         |      |          |            | HAPAFTAIANP       |
| KGT42578.1 | glutamine synthetase [Bacillus cereus]                       | 43  | 50420 | 1451 | 601.32  | 1800.94 | 7.38 | 0.2      | K          | TVNSYK R          |
|            | glutamine synthetase [Bacillus cereus]                       |     |       |      |         |         |      |          |            | LICDIYNADGTP      |
| KGT42578.1 | glutamine synthetase [Bacillus cereus]                       | 43  | 50420 | 1612 | 1014.45 | 2026.88 | 11.3 | 0.17     | R          | FDGDPR N          |
|            | glutamine synthetase [Bacillus cereus]                       |     |       |      |         |         |      |          |            | VLKEMEALGFS       |
| KGT42578.1 | glutamine synthetase [Bacillus cereus]                       | 43  | 50420 | 1976 | 974.162 | 2919.46 | 5.62 | 0.99     | R          | DFNLGPEPEFFL FK V |
| KGT42611.1 | betaine-aldehyde dehydrogenase [Bacillus cereus]             | 34  | 53823 | 569  | 539.303 | 1076.59 | 33.8 | 0.0018   | K          | IAFTGSTPVGK Q     |
|            | betaine-aldehyde dehydrogenase [Bacillus cereus]             |     |       |      |         |         |      |          |            | SQLAVNLHEK V      |
| KGT42611.1 | betaine-aldehyde dehydrogenase [Bacillus cereus]             | 36  | 53823 | 666  | 569.819 | 1137.62 | 2.44 | 1.6      | M          | LMYKLADLMEE       |
|            | betaine-aldehyde dehydrogenase [Bacillus cereus]             |     |       |      |         |         |      |          |            | HK E              |
| KGT42611.1 | betaine-aldehyde dehydrogenase [Bacillus cereus]             | 36  | 53823 | 1315 | 818.92  | 1635.82 | 2.97 | 1.3      | R          | IVGQTIPVSGDY      |
|            | betaine-aldehyde dehydrogenase [Bacillus cereus]             |     |       |      |         |         |      |          |            | FNYTR H           |
| KGT42611.1 | betaine-aldehyde dehydrogenase [Bacillus cereus]             | 36  | 53823 | 1557 | 965.492 | 1928.97 | 13.1 | 0.074    | K          | GVINIVPGFGES      |
|            | betaine-aldehyde dehydrogenase [Bacillus cereus]             |     |       |      |         |         |      |          |            | AGQALVNHPL        |
| KGT42611.1 | betaine-aldehyde dehydrogenase [Bacillus cereus]             | 36  | 53823 | 1857 | 844.463 | 2530.37 | 20.1 | 0.027    | K          | VDK I             |
|            | betaine-aldehyde dehydrogenase [Bacillus cereus]             |     |       |      |         |         |      |          |            | KLNQGVGLNPE       |
| KGT42611.1 | betaine-aldehyde dehydrogenase [Bacillus cereus]             | 36  | 53823 | 1878 | 860.459 | 2578.36 | 5.99 | 0.76     | K          | TTIGPLVSEEQQ K R  |
| KGT42626.1 | molybdenum cofactor biosynthesis protein A [Bacillus cereus] | 25  | 39174 | 766  | 545.817 | 1089.62 | 24.9 | 0.0076   | K          | IKINMVVQK G       |



|            |                                                                     |     |       |      |         |         |      |          |   |                                 |   |
|------------|---------------------------------------------------------------------|-----|-------|------|---------|---------|------|----------|---|---------------------------------|---|
| KGT42642.1 | peptide ABC transporter substrate-binding protein [Bacillus cereus] | 131 | 63436 | 561  | 473.26  | 944.505 | 48.5 | 6.10E-05 | K | AELDTLGVK                       | A |
| KGT42642.1 | peptide ABC transporter substrate-binding protein [Bacillus cereus] | 131 | 63436 | 2098 | 802.437 | 1602.86 | 37.4 | 0.0009   | K | MLLEDAAIAPL<br>YQR              | G |
| KGT42642.1 | peptide ABC transporter substrate-binding protein [Bacillus cereus] | 131 | 63436 | 2888 | 774.374 | 2320.1  | 57.6 | 4.30E-06 | K | YGLESDDTTLYN<br>GPFTLTDDWK      | H |
| KGT42642.1 | peptide ABC transporter substrate-binding protein [Bacillus cereus] | 138 | 63436 | 532  | 456.733 | 911.451 | 24.6 | 0.014    | K | DFVFAWK                         | R |
| KGT42642.1 | peptide ABC transporter substrate-binding protein [Bacillus cereus] | 202 | 63436 | 448  | 492.765 | 983.515 | 53.6 | 1.10E-05 | K | TPSTYFLR                        | L |
| KGT42642.1 | peptide ABC transporter substrate-binding protein [Bacillus cereus] | 202 | 63436 | 749  | 595.827 | 1189.64 | 36.7 | 0.00036  | K | LDEINFNVVK                      | D |
| KGT42642.1 | peptide ABC transporter substrate-binding protein [Bacillus cereus] | 202 | 63436 | 910  | 647.327 | 1292.64 | 55.1 | 1.80E-05 | R | VNLYESGQIDR                     | S |
| KGT42642.1 | peptide ABC transporter substrate-binding protein [Bacillus cereus] | 202 | 63436 | 1507 | 624.333 | 1869.98 | 43.8 | 0.00019  | K | NAQAINEGKAE<br>LDTLGVK          | A |
| KGT42642.1 | peptide ABC transporter substrate-binding protein [Bacillus cereus] | 202 | 63436 | 1671 | 707.7   | 2120.08 | 33.9 | 0.00077  | K | ELGKDAITVELL<br>NYDGDGAK        | K |
| KGT42642.1 | peptide ABC transporter substrate-binding protein [Bacillus cereus] | 202 | 63436 | 583  | 544.772 | 1087.53 | 13.5 | 0.2      | K | WSNGEPVTAK                      | D |
| KGT42642.1 | peptide ABC transporter substrate-binding protein [Bacillus cereus] | 202 | 63436 | 1648 | 1044.06 | 2086.1  | 2.11 | 2.2      | K | GLTNVILNDGS<br>TPADYLVPK        | E |
| KGT42642.1 | peptide ABC transporter substrate-binding protein [Bacillus cereus] | 232 | 63436 | 103  | 534.829 | 1067.64 | 21.3 | 0.0089   | K | NLPGLTVNLK                      | N |
| KGT42642.1 | peptide ABC transporter substrate-binding protein [Bacillus cereus] | 232 | 63436 | 299  | 687.354 | 1372.69 | 50.6 | 2.40E-05 | R | SGLTSEFVDKYK                    | S |
| KGT42642.1 | peptide ABC transporter substrate-binding protein [Bacillus cereus] | 232 | 63436 | 370  | 510.259 | 1527.75 | 24.3 | 0.0052   | K | GIVHHPVGGDY<br>SYK              | W |
| KGT42642.1 | peptide ABC transporter substrate-binding protein [Bacillus cereus] | 232 | 63436 | 584  | 854.786 | 2561.34 | 27.1 | 0.007    | K | GLTNVILNDGS<br>TPADYLVPKF<br>AK | S |
| KGT42642.1 | peptide ABC transporter substrate-binding protein [Bacillus cereus] | 235 | 63436 | 72   | 487.28  | 972.545 | 15   | 0.2      | K | RGGQDTVLLK                      | S |

|            |                                                                     |     |       |      |         |         |      |          |   |              |   |
|------------|---------------------------------------------------------------------|-----|-------|------|---------|---------|------|----------|---|--------------|---|
| KGT42642.1 | peptide ABC transporter substrate-binding protein [Bacillus cereus] | 235 | 63436 | 74   | 492.286 | 982.557 | 12.9 | 0.11     | R | GDAIVQRPK    | V |
| KGT42642.1 | peptide ABC transporter substrate-binding protein [Bacillus cereus] | 235 | 63436 | 86   | 513.252 | 1024.49 | 6.9  | 1        | K | WAYITEDK     | - |
| KGT42642.1 | peptide ABC transporter substrate-binding protein [Bacillus cereus] | 235 | 63436 | 364  | 506.954 | 1517.84 | 21.1 | 0.031    | K | TVKLDEINFNV  | D |
| KGT42642.1 | peptide ABC transporter substrate-binding protein [Bacillus cereus] | 235 | 63436 | 510  | 1003.49 | 2004.97 | 8.43 | 0.89     | K | VK           |   |
| KGT42642.1 | peptide ABC transporter substrate-binding protein [Bacillus cereus] | 235 | 63436 | 537  | 714.363 | 2140.07 | 20.4 | 0.054    | K | QVLNLTESQEIP | A |
| KGT42642.1 | peptide ABC transporter substrate-binding protein [Bacillus cereus] | 235 | 63436 | 537  | 714.363 | 2140.07 | 20.4 | 0.054    | K | SMDSAK       |   |
| KGT42643.1 | peptide ABC transporter substrate-binding protein [Bacillus cereus] | 199 | 64325 | 654  | 513.258 | 1024.5  | 30.9 | 0.0036   | K | ATDQVSFLALN  | L |
| KGT42643.1 | peptide ABC transporter substrate-binding protein [Bacillus cereus] | 199 | 64325 | 738  | 537.308 | 1072.6  | 43.8 | 7.80E-05 | R | NVMEGLYR     |   |
| KGT42643.1 | peptide ABC transporter substrate-binding protein [Bacillus cereus] | 199 | 64325 | 1614 | 708.315 | 1414.62 | 87.8 | 3.60E-09 | K | HEQGWQLK     | K |
| KGT42643.1 | peptide ABC transporter substrate-binding protein [Bacillus cereus] | 199 | 64325 | 1614 | 708.315 | 1414.62 | 87.8 | 3.60E-09 | K | EAIALSVDKK   | G |
| KGT42643.1 | peptide ABC transporter substrate-binding protein [Bacillus cereus] | 199 | 64325 | 1614 | 708.315 | 1414.62 | 87.8 | 3.60E-09 | K | SPYNQMSYSN   |   |
| KGT42643.1 | peptide ABC transporter substrate-binding protein [Bacillus cereus] | 44  | 64325 | 798  | 611.301 | 1220.59 | 43.7 | 8.00E-05 | K | PK           | Y |
| KGT42643.1 | peptide ABC transporter substrate-binding protein [Bacillus cereus] | 44  | 64325 | 798  | 611.301 | 1220.59 | 43.7 | 8.00E-05 | K | HNISPEYSFK   | W |
| KGT42643.1 | peptide ABC transporter substrate-binding protein [Bacillus cereus] | 52  | 64325 | 527  | 703.044 | 2106.11 | 36.6 | 0.0009   | R | LLDKNTAAEYA  |   |
| KGT42643.1 | peptide ABC transporter substrate-binding protein [Bacillus cereus] | 52  | 64325 | 543  | 719.667 | 2155.98 | 34.4 | 0.0017   | K | FIAYYIK      | N |
| KGT42643.1 | peptide ABC transporter substrate-binding protein [Bacillus cereus] | 52  | 64325 | 543  | 719.667 | 2155.98 | 34.4 | 0.0017   | K | SNKEEYGEYAE  |   |
| KGT42643.1 | peptide ABC transporter substrate-binding protein [Bacillus cereus] | 52  | 64325 | 491  | 961.002 | 1919.99 | 6.22 | 1.4      | K | SSTFFLR      | L |
| KGT42644.1 | peptide ABC transporter substrate-binding protein [Bacillus cereus] | 52  | 64325 | 491  | 961.002 | 1919.99 | 6.22 | 1.4      | K | LFLEEDAGLVPL |   |
| KGT42644.1 | peptide ABC transporter substrate-binding protein [Bacillus cereus] | 52  | 64325 | 491  | 961.002 | 1919.99 | 6.22 | 1.4      | K | YQTGR        | S |
| KGT42644.1 | peptide ABC transporter substrate-binding protein [Bacillus cereus] | 85  | 63826 | 2474 | 949.022 | 1896.03 | 54.7 | 9.80E-06 | K | NAEAINKGKPK  |   |
| KGT42644.1 | peptide ABC transporter substrate-binding protein [Bacillus cereus] | 85  | 63826 | 2474 | 949.022 | 1896.03 | 54.7 | 9.80E-06 | K | VTELGVK      | A |
| KGT42644.1 | peptide ABC transporter substrate-binding protein [Bacillus cereus] | 87  | 63826 | 2792 | 723.345 | 2167.01 | 4.45 | 0.38     | R | NNKEEFGTYSQ  |   |
| KGT42644.1 | peptide ABC transporter substrate-binding protein [Bacillus cereus] | 87  | 63826 | 2792 | 723.345 | 2167.01 | 4.45 | 0.38     | R | VSTFFLR      | M |
| KGT42644.1 | peptide ABC transporter substrate-binding protein [Bacillus cereus] | 87  | 63826 | 2873 | 1153.06 | 2304.11 | 16.8 | 0.078    | K | YGLESDDTVYN  |   |
| KGT42644.1 | peptide ABC transporter substrate-binding protein [Bacillus cereus] | 87  | 63826 | 2873 | 1153.06 | 2304.11 | 16.8 | 0.078    | K | GPFVLTDWK    | H |
| KGT42644.1 | peptide ABC transporter substrate-binding protein [Bacillus cereus] | 613 | 63826 | 398  | 310.156 | 927.446 | 28.5 | 0.0041   | K |              |   |
| KGT42644.1 | peptide ABC transporter substrate-binding protein [Bacillus cereus] | 613 | 63826 | 398  | 310.156 | 927.446 | 28.5 | 0.0041   | K | YDDMIKK      | A |

|            |                                                                     |     |       |      |         |         |      |          |   |               |   |
|------------|---------------------------------------------------------------------|-----|-------|------|---------|---------|------|----------|---|---------------|---|
| KGT42644.1 | peptide ABC transporter substrate-binding protein [Bacillus cereus] | 613 | 63826 | 481  | 504.739 | 1007.46 | 35.7 | 0.001    | K | AGTELMGDAK    | K |
| KGT42644.1 | peptide ABC transporter substrate-binding protein [Bacillus cereus] | 613 | 63826 | 732  | 590.319 | 1178.62 | 40.8 | 0.00045  | K | LDEINYSVVK    | E |
| KGT42644.1 | peptide ABC transporter substrate-binding protein [Bacillus cereus] | 613 | 63826 | 934  | 654.347 | 1306.68 | 49.2 | 6.90E-05 | K | VGEYVKDQIEK   | N |
| KGT42644.1 | peptide ABC transporter substrate-binding protein [Bacillus cereus] | 613 | 63826 | 1150 | 736.396 | 1470.78 | 77.9 | 5.30E-08 | K | TTAEYAFIAFPIK | N |
| KGT42644.1 | peptide ABC transporter substrate-binding protein [Bacillus cereus] | 613 | 63826 | 1192 | 503.286 | 1506.84 | 23.7 | 0.0095   | K | TVKLDEINYSVV  |   |
| KGT42644.1 | peptide ABC transporter substrate-binding protein [Bacillus cereus] | 613 | 63826 | 1390 | 570.951 | 1709.83 | 37.2 | 0.00033  | K | K             | E |
| KGT42644.1 | peptide ABC transporter substrate-binding protein [Bacillus cereus] | 613 | 63826 | 1416 | 590.677 | 1769.01 | 46.6 | 2.80E-05 | K | GLATGPDGKDF   |   |
| KGT42644.1 | peptide ABC transporter substrate-binding protein [Bacillus cereus] | 613 | 63826 | 1665 | 1056.51 | 2111.01 | 31.9 | 0.001    | K | QETFK         | N |
| KGT42644.1 | peptide ABC transporter substrate-binding protein [Bacillus cereus] | 613 | 63826 | 1684 | 709.387 | 2125.14 | 41   | 0.00027  | K | LLLEQDVALVPL  |   |
| KGT42644.1 | peptide ABC transporter substrate-binding protein [Bacillus cereus] | 613 | 63826 | 1738 | 741.054 | 2220.14 | 48.4 | 2.90E-05 | K | YQR           | G |
| KGT42644.1 | peptide ABC transporter substrate-binding protein [Bacillus cereus] | 613 | 63826 | 1884 | 864.121 | 2589.34 | 139  | 4.30E-14 | R | NTDNLGSQILG   |   |
| KGT42644.1 | peptide ABC transporter substrate-binding protein [Bacillus cereus] | 624 | 63826 | 544  | 528.751 | 1055.49 | 20.1 | 0.03     | K | NTMEGLYR      | L |
| KGT42663.1 | glycosyl hydrolase [Bacillus cereus]                                | 72  | 48106 | 807  | 557.274 | 1112.53 | 71.8 | 1.80E-07 | R | NLANVILNDGS   |   |
| KGT42663.1 | glycosyl hydrolase [Bacillus cereus]                                | 72  | 48106 | 2299 | 867.498 | 1732.98 | 2.47 | 0.74     | K | KPADFLVPK     | G |
| KGT42663.1 | glycosyl hydrolase [Bacillus cereus]                                | 72  | 48106 | 2677 | 1053.02 | 2104.03 | 2.05 | 1        | K | ELGKDQVTIELL  |   |
| KGT42663.1 | glycosyl hydrolase [Bacillus cereus]                                | 72  | 48106 | 2940 | 811.39  | 2431.15 | 0.93 | 1.3      | K | NYDTGNAK      | K |
| KGT42663.1 | glycosyl hydrolase [Bacillus cereus]                                | 72  | 48106 | 2940 | 811.39  | 2431.15 | 0.93 | 1.3      | K | VNLFDTGAIKF   |   |
| KGT42663.1 | glycosyl hydrolase [Bacillus cereus]                                | 72  | 48106 | 2940 | 811.39  | 2431.15 | 0.93 | 1.3      | K | ALLSGEFVDKY   |   |
| KGT42663.1 | glycosyl hydrolase [Bacillus cereus]                                | 72  | 48106 | 2940 | 811.39  | 2431.15 | 0.93 | 1.3      | K | R             | N |
| KGT42663.1 | glycosyl hydrolase [Bacillus cereus]                                | 72  | 48106 | 2940 | 811.39  | 2431.15 | 0.93 | 1.3      | K | DFAYAWQR      | L |
| KGT42663.1 | glycosyl hydrolase [Bacillus cereus]                                | 72  | 48106 | 2940 | 811.39  | 2431.15 | 0.93 | 1.3      | K | SGDSVYSLASK   | Y |
| KGT42663.1 | glycosyl hydrolase [Bacillus cereus]                                | 72  | 48106 | 2940 | 811.39  | 2431.15 | 0.93 | 1.3      | K | TRLPSGYTLSTT  |   |
| KGT42663.1 | glycosyl hydrolase [Bacillus cereus]                                | 72  | 48106 | 2940 | 811.39  | 2431.15 | 0.93 | 1.3      | K | LVPK          | T |
| KGT42663.1 | glycosyl hydrolase [Bacillus cereus]                                | 72  | 48106 | 2940 | 811.39  | 2431.15 | 0.93 | 1.3      | K | IMMGQNLYGF    |   |
| KGT42663.1 | glycosyl hydrolase [Bacillus cereus]                                | 72  | 48106 | 2940 | 811.39  | 2431.15 | 0.93 | 1.3      | K | DWKLPFK       | Q |
| KGT42663.1 | glycosyl hydrolase [Bacillus cereus]                                | 72  | 48106 | 2940 | 811.39  | 2431.15 | 0.93 | 1.3      | K | SQMPPQKIMM    |   |
| KGT42663.1 | glycosyl hydrolase [Bacillus cereus]                                | 72  | 48106 | 2940 | 811.39  | 2431.15 | 0.93 | 1.3      | K | GQNLYGFDWK    | L |

|            |                                            |     |       |      |         |         |      |          |   |              |   |
|------------|--------------------------------------------|-----|-------|------|---------|---------|------|----------|---|--------------|---|
| KGT42663.1 | glycosyl hydrolase [Bacillus cereus]       | 103 | 48106 | 55   | 589.345 | 1176.68 | 47.6 | 4.00E-05 | R | LLVENFTITK   | K |
| KGT42663.1 | glycosyl hydrolase [Bacillus cereus]       | 103 | 48106 | 82   | 639.361 | 1276.71 | 59.1 | 4.90E-06 | K | FITNILQTAEK  | Y |
| KGT42663.1 | glycosyl hydrolase [Bacillus cereus]       | 103 | 48106 | 357  | 867.482 | 2599.43 | 29.1 | 0.0017   | R | AVESIAYLQPST | A |
| KGT42663.1 | glycosyl hydrolase [Bacillus cereus]       | 103 | 48106 | 195  | 865.489 | 1728.96 | 5.87 | 0.65     | R | IPIKESLVNATR | E |
| KGT42670.1 | aconitate hydratase [Bacillus cereus]      | 20  | 99193 | 1325 | 823.454 | 1644.89 | 11.7 | 0.24     | K | AVESIAYLQPST | V |
| KGT42670.1 | aconitate hydratase [Bacillus cereus]      | 20  | 99193 | 1466 | 911.48  | 1820.95 | 20.3 | 0.044    | K | IPIK         | K |
| KGT42670.1 | aconitate hydratase [Bacillus cereus]      | 20  | 99193 | 1483 | 923.493 | 1844.97 | 9.45 | 0.47     | K | LTGTLPSGTTAT | V |
| KGT42670.1 | aconitate hydratase [Bacillus cereus]      | 20  | 99193 | 1844 | 821.429 | 2461.27 | 18.7 | 0.054    | K | DVALK        | V |
| KGT42709.1 | histidine kinase [Bacillus cereus]         | 34  | 44200 | 1531 | 695.361 | 1388.71 | 33.5 | 0.0026   | K | EIEDVVQSVVT  | G |
| KGT42709.1 | histidine kinase [Bacillus cereus]         | 34  | 44200 | 296  | 650.364 | 649.357 | 21   | 0.051    | - | SELFK        | G |
| KGT42736.1 | disulfide oxidoreductase [Bacillus cereus] | 21  | 88560 | 658  | 566.29  | 1130.57 | 20.8 | 0.044    | K | ALENAGVGNV   | Y |
| KGT42783.1 | hypothetical protein IY08_16305            | 13  | 41030 | 2617 | 1022.51 | 2043.01 | 13   | 0.06     | R | SQLPYSVK     | D |
| KGT42845.1 | 6-aminoheptanoate hydrolase                | 43  | 47377 | 102  | 660.325 | 1318.64 | 43.2 | 9.00E-05 | K | AVVAPVGTQG   | W |
| KGT42845.1 | 6-aminoheptanoate hydrolase                | 43  | 47377 | 358  | 871.087 | 2610.24 | 10.6 | 0.1      | K | LGFNEQEFDKE  | R |
| KGT42926.1 | 5-amino-6-(5-phosphoribosylamino)uracil    | 25  | 40144 | 68   | 456.235 | 910.455 | 25.2 | 0.011    | R | VK           | N |
| KGT42930.1 | hypothetical protein IY08_17080            | 17  | 18051 | 762  | 545.295 | 1088.58 | 17.3 | 0.024    | K | LGEQSTASQLID | M |
| KGT42980.1 | catabolite gene activator protein          | 23  | 26839 | 335  | 734.888 | 1467.76 | 22.7 | 0.028    | R | K            | K |

|            |                                     |     |       |      |         |         |      |          |             |              |
|------------|-------------------------------------|-----|-------|------|---------|---------|------|----------|-------------|--------------|
|            | hypothetical protein IY08_17475     |     |       |      |         |         |      |          | VTVTRPAVYNN |              |
| KGT43002.1 | [Bacillus cereus]                   | 48  | 17798 | 2359 | 592.97  | 1775.89 | 47.5 | 9.00E-05 | K           | EADAR I      |
|            |                                     |     |       |      |         |         |      |          |             | AEGYPSVFYGD  |
| KGT43012.1 | alpha-amylase [Bacillus cereus]     | 25  | 58268 | 468  | 908.916 | 1815.82 | 8.71 | 0.52     | R           | YYGTK G      |
|            |                                     |     |       |      |         |         |      |          |             | EGDSVHANSGL  |
|            |                                     |     |       |      |         |         |      |          |             | ATLISDGP GGA |
| KGT43012.1 | alpha-amylase [Bacillus cereus]     | 25  | 58268 | 540  | 718.371 | 2152.09 | 25   | 0.019    | R           | K W          |
| KGT43018.1 | agmatine deiminase [Bacillus        | 14  | 43754 | 174  | 576.327 | 575.32  | 6.14 | 0.68     | R           | KNVSK Q      |
| KGT43018.1 | agmatine deiminase [Bacillus        | 14  | 43754 | 824  | 560.286 | 1118.56 | 6.99 | 0.71     | K           | NVSKQSGIER V |
| KGT43018.1 | agmatine deiminase [Bacillus        | 14  | 43754 | 1021 | 604.306 | 1206.6  | 13.7 | 0.053    | K           | TPYKNDAQIR K |
|            | glycerophosphodiester               |     |       |      |         |         |      |          |             |              |
| KGT43023.1 | phosphodiesterase [Bacillus cereus] | 62  | 35877 | 1015 | 602.335 | 1202.66 | 26.3 | 0.0034   | K           | VPTLEEIFQK Y |
|            | glycerophosphodiester               |     |       |      |         |         |      |          |             | DGQLIAMHDT   |
| KGT43023.1 | phosphodiesterase [Bacillus cereus] | 62  | 35877 | 1964 | 771.377 | 1540.74 | 50.4 | 1.90E-05 | K           | AVDR T       |
|            |                                     |     |       |      |         |         |      |          |             | YNVMVFNLNQ   |
| KGT43053.1 | stress protein [Bacillus cereus]    | 66  | 19666 | 2496 | 959.94  | 1917.87 | 29.2 | 0.0042   | R           | NYEDR F      |
| KGT43071.1 | chitin-binding protein [Bacillus    | 56  | 73630 | 774  | 547.296 | 1092.58 | 55.8 | 1.10E-05 | K           | ITLTDIFDR T  |
| KGT43071.1 | chitin-binding protein [Bacillus    | 56  | 73630 | 174  | 576.327 | 575.32  | 7.77 | 0.47     | R           | KVSDK Q      |
|            | chitin-binding protein [Bacillus    |     |       |      |         |         |      |          |             | TRATLTNLENG  |
| KGT43071.1 | cereus]                             | 56  | 73630 | 1316 | 660.328 | 1318.64 | 17.7 | 0.097    | K           | K Q          |
|            | hemolysin BL lytic component L2     |     |       |      |         |         |      |          |             |              |
| KGT43102.1 | [Bacillus cereus]                   | 61  | 49291 | 737  | 537.295 | 1072.57 | 61.4 | 4.40E-06 | R           | QINELTDLK L  |
|            | hemolysin BL lytic component L2     |     |       |      |         |         |      |          |             | AYLDDLEKQNNQ |
| KGT43102.1 | [Bacillus cereus]                   | 61  | 49291 | 1746 | 732.879 | 1463.74 | 0.44 | 0.91     | R           | K I          |
|            | hemolysin BL lytic component L2     |     |       |      |         |         |      |          |             | LEVLQEMAMT   |
| KGT43102.1 | [Bacillus cereus]                   | 61  | 49291 | 2610 | 1018.97 | 2035.92 | 13.4 | 0.18     | R           | NQENAGR Q    |
|            | hemolysin BL lytic component L2     |     |       |      |         |         |      |          |             | LSTNVDTTNEQ  |
| KGT43102.1 | [Bacillus cereus]                   | 28  | 49291 | 1622 | 684.007 | 2049    | 27.8 | 0.0025   | K           | SQKDTLR Q    |
|            |                                     |     |       |      |         |         |      |          |             | SMLLLTQNDLH  |
|            | hemolysin BL lytic component L2     |     |       |      |         |         |      |          |             | TFANQVDVELD  |
| KGT43102.1 | [Bacillus cereus]                   | 32  | 49291 | 1987 | 761.403 | 3041.58 | 5.52 | 0.88     | K           | LLKR Y       |
|            | hemolysin BL lytic component L2     |     |       |      |         |         |      |          |             |              |
| KGT43102.1 | [Bacillus cereus]                   | 369 | 49291 | 39   | 555.264 | 1108.51 | 33.3 | 0.0021   | K           | SFVDNKEDR E  |

|            |                                                       |     |       |      |         |         |      |          |   |                                     |   |
|------------|-------------------------------------------------------|-----|-------|------|---------|---------|------|----------|---|-------------------------------------|---|
| KGT43102.1 | hemolysin BL lytic component L2<br>[Bacillus cereus]  | 369 | 49291 | 178  | 816.419 | 1630.82 | 69.6 | 3.90E-07 | K | NVISYLEEQVYK<br>F                   | - |
| KGT43102.1 | hemolysin BL lytic component L2<br>[Bacillus cereus]  | 369 | 49291 | 180  | 822.932 | 1643.85 | 73.2 | 1.40E-07 | K | EIIEPAAQAGV<br>AAYNK                | G |
| KGT43102.1 | hemolysin BL lytic component L2<br>[Bacillus cereus]  | 369 | 49291 | 309  | 751.718 | 2252.13 | 89.1 | 4.60E-09 | K | LKDFD TDVATA<br>QGILSTDGTGK         | I |
| KGT43102.1 | hemolysin BL lytic component L2<br>[Bacillus cereus]  | 369 | 49291 | 373  | 904.833 | 2711.48 | 95.8 | 5.20E-10 | K | AIQN DLQQIALI<br>PGALNEQGFAI<br>FK  | E |
| KGT43102.1 | hemolysin BL lytic component L2<br>[Bacillus cereus]  | 369 | 49291 | 381  | 947.527 | 2839.56 | 38.4 | 0.00025  | K | KAIQN DLQQIA<br>LIPGALNEQGF<br>AIFK | E |
| KGT43102.1 | hemolysin BL lytic component L2<br>[Bacillus cereus]  | 373 | 49291 | 12   | 500.776 | 999.538 | 22.3 | 0.02     | K | QGEIAAAAAAK                         | T |
| KGT43102.1 | hemolysin BL lytic component L2<br>[Bacillus cereus]  | 373 | 49291 | 41   | 556.293 | 1110.57 | 12.4 | 0.2      | K | TFGVFAEVNK                          | L |
| KGT43118.1 | bromoperoxidase [Bacillus cereus]                     | 39  | 30965 | 1642 | 713.369 | 1424.72 | 29.1 | 0.006    | K | EFNEALLSFLKD<br>MLDLGIPVGAG         | - |
| KGT43122.1 | amidohydrolase [Bacillus cereus]                      | 32  | 68239 | 2063 | 794.902 | 1587.79 | 32.2 | 0.001    | R | SDATR                               | V |
| KGT43122.1 | amidohydrolase [Bacillus cereus]                      | 38  | 68239 | 240  | 616.404 | 615.396 | 23.3 | 0.033    | K | KIDLK<br>IDNSDDENPVIS               | R |
| KGT43131.1 | hydrolase [Bacillus cereus]                           | 74  | 57976 | 2771 | 1068.53 | 2135.05 | 74.3 | 1.10E-07 | K | TTL SFIR<br>NQIYILGHSQG             | H |
| KGT43131.1 | hydrolase [Bacillus cereus]                           | 74  | 57976 | 2501 | 960.957 | 1919.9  | 8.75 | 0.78     | K | GMMLPK                              | M |
| KGT43135.1 | deoxyribodipyrimidine photolyase<br>[Bacillus cereus] | 26  | 55851 | 467  | 501.306 | 1000.6  | 25.6 | 0.0072   | K | ELGSTLIIR                           | K |
| KGT43135.1 | deoxyribodipyrimidine photolyase<br>[Bacillus cereus] | 26  | 55851 | 848  | 630.817 | 1259.62 | 3.03 | 2.3      | K | EEELLSVWQK<br>QVNSFIRQLIW           | G |
| KGT43135.1 | deoxyribodipyrimidine photolyase<br>[Bacillus cereus] | 26  | 55851 | 1242 | 781.43  | 1560.84 | 2.93 | 2.4      | K | R                                   | E |
| KGT43157.1 | gamma-glutamyl kinase [Bacillus                       | 19  | 39305 | 337  | 679.356 | 678.348 | 19.4 | 0.054    | K | LGTGGMK                             | S |
| KGT43282.1 | acetyltransferase [Bacillus cereus]                   | 21  | 16308 | 774  | 547.296 | 1092.58 | 0.07 | 4.2      | R | IEGEYIKNK                           | V |

[illegible]

|            |                               |      |       |      |         |         |      |          |   |                                    |   |
|------------|-------------------------------|------|-------|------|---------|---------|------|----------|---|------------------------------------|---|
| KGT43479.1 | chitosanase [Bacillus cereus] | 100  | 50707 | 2822 | 1118.47 | 2234.93 | 38.5 | 0.00014  | K | DFLEESEYTNAY<br>YYNASR             | V |
| KGT43479.1 | chitosanase [Bacillus cereus] | 100  | 50707 | 3000 | 640.317 | 2557.24 | 41   | 0.00014  | K | AQGHFDSATD<br>GDLDIAYSLLLA<br>HK   | Q |
| KGT43479.1 | chitosanase [Bacillus cereus] | 100  | 50707 | 3031 | 672.348 | 2685.36 | 21.9 | 0.0088   | K | KAQGHFDSAT<br>DGDLDIAYSLLL<br>AHK  | Q |
| KGT43479.1 | chitosanase [Bacillus cereus] | 100  | 50707 | 502  | 428.232 | 854.45  | 8.86 | 0.33     | K | IYDGLFK                            | T |
| KGT43479.1 | chitosanase [Bacillus cereus] | 35   | 50707 | 95   | 524.265 | 1046.52 | 34.6 | 0.0015   | R | LNLGDWDSK<br>NDLSSLPGGYY           | S |
| KGT43479.1 | chitosanase [Bacillus cereus] | 35   | 50707 | 314  | 706.861 | 1411.71 | 4.43 | 2.1      | K | VK<br>YSPNTGLISDFV                 | G |
| KGT43479.1 | chitosanase [Bacillus cereus] | 26   | 50707 | 656  | 770.408 | 1538.8  | 1.84 | 2.4      | K | VK                                 | N |
| KGT43479.1 | chitosanase [Bacillus cereus] | 1113 | 50707 | 8    | 481.257 | 960.5   | 26   | 0.0089   | K | VSSWIQNK                           | T |
| KGT43479.1 | chitosanase [Bacillus cereus] | 1113 | 50707 | 27   | 539.247 | 1076.48 | 35   | 0.00075  | R | AFYEFTGDK<br>WVNSGWDW              | T |
| KGT43479.1 | chitosanase [Bacillus cereus] | 1113 | 50707 | 97   | 654.794 | 1307.57 | 49.6 | 3.30E-05 | K | MK<br>IVMDYAMYGE                   | N |
| KGT43479.1 | chitosanase [Bacillus cereus] | 1113 | 50707 | 101  | 660.301 | 1318.59 | 64.4 | 9.30E-07 | R | K<br>QWGSNGTVNY                    | R |
| KGT43479.1 | chitosanase [Bacillus cereus] | 1113 | 50707 | 125  | 683.842 | 1365.67 | 79.4 | 8.10E-08 | K | LK<br>SSQNPNLMG                    | E |
| KGT43479.1 | chitosanase [Bacillus cereus] | 1113 | 50707 | 196  | 866.921 | 1731.83 | 74.9 | 1.50E-07 | K | WVVADSK<br>SSQNPNLMG               | K |
| KGT43479.1 | chitosanase [Bacillus cereus] | 1113 | 50707 | 224  | 620.984 | 1859.93 | 102  | 2.80E-10 | K | WVVADSKK<br>SSLDTRPSDW             | A |
| KGT43479.1 | chitosanase [Bacillus cereus] | 1113 | 50707 | 235  | 640.304 | 1917.89 | 87.3 | 9.40E-09 | K | MMSHLR<br>EMKFPQQVN<br>YAGVIKPNHVT | A |
| KGT43479.1 | chitosanase [Bacillus cereus] | 1113 | 50707 | 429  | 850.193 | 3396.74 | 133  | 1.40E-13 | K | QESLNASVR                          | S |



|            |                                  |      |       |      |         |         |      |         |   |              |   |
|------------|----------------------------------|------|-------|------|---------|---------|------|---------|---|--------------|---|
|            |                                  |      |       |      |         |         |      |         |   | GEITGDADGFK  |   |
|            |                                  |      |       |      |         |         |      |         |   | PLGTSEGQGYG  |   |
|            |                                  |      |       |      |         |         |      |         |   | MIITVLMAGYD  |   |
| KGT43479.1 | chitosanase [Bacillus cereus]    | 1113 | 50707 | 444  | 977.714 | 3906.83 | 39.1 | 0.00045 | K | SNAQK        | I |
|            | 2-haloalkanoic acid dehalogenase |      |       |      |         |         |      |         |   |              |   |
| KGT43521.1 | [Bacillus cereus]                | 23   | 27094 | 1032 | 458.604 | 1372.79 | 23.2 | 0.012   | K | AVDNLFLLVLEK | C |
|            | hypothetical protein IY08_13565  |      |       |      |         |         |      |         |   | INIHKSVSPEML |   |
| KGT43543.1 | [Bacillus cereus]                | 16   | 12897 | 969  | 990.561 | 1979.11 | 15.6 | 0.043   | K | AWLNK        | Q |
|            | hypothetical protein IY08_13615  |      |       |      |         |         |      |         |   |              |   |
| KGT43553.1 | [Bacillus cereus]                | 23   | 12876 | 247  | 623.341 | 622.334 | 23.2 | 0.023   | K | LSFQK        | T |
| KGT43685.1 | lysyl-tRNA synthetase [Bacillus  | 23   | 61250 | 493  | 510.257 | 1018.5  | 22.7 | 0.036   | K | ELSVLNTNK    | M |
|            | lysyl-tRNA synthetase [Bacillus  |      |       |      |         |         |      |         |   |              |   |
| KGT43685.1 | cereus]                          | 23   | 61250 | 1034 | 687.858 | 1373.7  | 5.61 | 1.2     | K | LNWKIDWPMR   | W |
|            | hypothetical protein IY08_12550  |      |       |      |         |         |      |         |   | MQIGSNIHTLS  |   |
| KGT43694.1 | [Bacillus cereus]                | 21   | 13085 | 2186 | 828.902 | 1655.79 | 21   | 0.013   | - | QPTK         | I |
| KGT43748.1 | carboxylase [Bacillus cereus]    | 28   | 57014 | 970  | 666.386 | 1330.76 | 27.7 | 0.0047  | K | LFAQELITGLAR | I |
| KGT43748.1 | carboxylase [Bacillus cereus]    | 35   | 57014 | 503  | 514.279 | 1026.54 | 24.4 | 0.011   | K | IAALPEEER    | A |
| KGT43748.1 | carboxylase [Bacillus cereus]    | 35   | 57014 | 550  | 531.766 | 1061.52 | 12.5 | 0.33    | K | VTLEEMGGAR   | M |
|            | aminoacyl-histidine dipeptidase  |      |       |      |         |         |      |         |   |              |   |
| KGT43789.1 | [Bacillus cereus]                | 42   | 54726 | 467  | 501.306 | 1000.6  | 41.6 | 0.00018 | R | ESVATILIR    | T |
|            | aminoacyl-histidine dipeptidase  |      |       |      |         |         |      |         |   |              |   |
| KGT43789.1 | [Bacillus cereus]                | 42   | 54726 | 661  | 567.261 | 1132.51 | 0.07 | 3       | R | TEDVGQVEEK   | L |
|            | aminoacyl-histidine dipeptidase  |      |       |      |         |         |      |         |   | NLEVIQDEALN  |   |
| KGT43789.1 | [Bacillus cereus]                | 42   | 54726 | 1479 | 613.694 | 1838.06 | 5.53 | 0.28    | R | VIIKK        | E |
|            | aminoacyl-histidine dipeptidase  |      |       |      |         |         |      |         |   | GLVESSTNLGVI |   |
| KGT43789.1 | [Bacillus cereus]                | 42   | 54726 | 1695 | 715.718 | 2144.13 | 4.05 | 1.4     | K | ETLQDEIK     | L |
|            | 2-methylcitrate dehydratase      |      |       |      |         |         |      |         |   |              |   |
| KGT43808.1 | [Bacillus cereus]                | 33   | 53685 | 508  | 430.27  | 858.525 | 33.1 | 0.00067 | K | VATTAVVAK    | M |
|            | 2-methylcitrate dehydratase      |      |       |      |         |         |      |         |   | EVLEM MIKAHE |   |
| KGT43808.1 | [Bacillus cereus]                | 33   | 53685 | 3049 | 919.119 | 2754.34 | 2.5  | 0.7     | R | IQGVLAENSL   | V |
|            | 2-methylcitrate dehydratase      |      |       |      |         |         |      |         |   | VPGTSYVLDPV  |   |
| KGT43808.1 | [Bacillus cereus]                | 46   | 53685 | 226  | 637.855 | 1273.7  | 46   | 0.00013 | R | K            | G |

|            |                                                                |      |       |      |         |         |      |          |   |                                           |   |
|------------|----------------------------------------------------------------|------|-------|------|---------|---------|------|----------|---|-------------------------------------------|---|
| KGT43808.1 | 2-methylcitrate dehydratase<br>[Bacillus cereus]               | 46   | 53685 | 394  | 795.473 | 1588.93 | 5.16 | 0.3      | K | LLGPVVPGTIVP<br>NGTR                      | V |
| KGT43812.1 | methylmalonate-semialdehyde<br>dehydrogenase [Bacillus cereus] | 31   | 53088 | 471  | 400.235 | 798.456 | 31.3 | 0.0011   | R | TPLLAER                                   | L |
| KGT43812.1 | methylmalonate-semialdehyde<br>dehydrogenase [Bacillus cereus] | 74   | 53088 | 748  | 595.807 | 1189.6  | 45.7 | 7.40E-05 | K | TLTDATGEVQR                               | G |
| KGT43812.1 | methylmalonate-semialdehyde<br>dehydrogenase [Bacillus cereus] | 74   | 53088 | 1083 | 706.878 | 1411.74 | 46.6 | 0.0001   | R | LVELFYEAGFPK                              | G |
| KGT43828.1 | diguanylate cyclase [Bacillus cereus]                          | 21   | 3E+05 | 124  | 550.291 | 1098.57 | 5.14 | 1.2      | R | GIAKNEELPK<br>LEMGNQGSAL                  | S |
| KGT43828.1 | diguanylate cyclase [Bacillus cereus]                          | 21   | 3E+05 | 474  | 922.494 | 1842.97 | 5.37 | 1.2      | R | DVLLPLR<br>GVIVPMRGLSN                    | A |
| KGT43828.1 | diguanylate cyclase [Bacillus cereus]                          | 21   | 3E+05 | 540  | 718.371 | 2152.09 | 20.7 | 0.05     | K | FLMAMQQK<br>GSVIVAAAGNA                   | F |
| KGT43836.1 | alkaline serine protease [Bacillus<br>cereus]                  | 52   | 42354 | 1351 | 665.851 | 1329.69 | 51.9 | 3.10E-05 | K | GNTK<br>SVGANVLSKDD                       | A |
| KGT43836.1 | alkaline serine protease [Bacillus<br>cereus]                  | 52   | 42354 | 1087 | 616.824 | 1231.63 | 0.93 | 1.1      | K | K<br>IQAPQAWDSQ                           | L |
| KGT43836.1 | alkaline serine protease [Bacillus<br>cereus]                  | 184  | 42354 | 246  | 650.329 | 1298.64 | 56.3 | 1.10E-05 | K | R<br>VAIIDTGVQGS                          | S |
| KGT43836.1 | alkaline serine protease [Bacillus<br>cereus]                  | 184  | 42354 | 465  | 603.326 | 1806.96 | 94.2 | 2.00E-09 | K | HPDLASK<br>VLDNQSGSTLD                    | V |
| KGT43836.1 | alkaline serine protease [Bacillus<br>cereus]                  | 184  | 42354 | 467  | 907.48  | 1812.95 | 62.5 | 2.20E-06 | R | AVAQGIR                                   | E |
| KGT43836.1 | alkaline serine protease [Bacillus<br>cereus]                  | 1515 | 42354 | 194  | 506.759 | 1011.5  | 44   | 0.00013  | K | ISGTGTYWK                                 | N |
| KGT43836.1 | alkaline serine protease [Bacillus<br>cereus]                  | 1515 | 42354 | 204  | 517.776 | 1033.54 | 28   | 0.0024   | R | QIESTTDK<br>QIESTTDKISGT                  | I |
| KGT43836.1 | alkaline serine protease [Bacillus<br>cereus]                  | 1515 | 42354 | 1015 | 1014.52 | 2027.03 | 63.7 | 1.10E-06 | R | GTYWK                                     | N |
| KGT43836.1 | alkaline serine protease [Bacillus<br>cereus]                  | 1515 | 42354 | 1226 | 816.734 | 2447.18 | 149  | 9.10E-15 | K | ANYPAYYSEVIA<br>VASTDQSDRK<br>VISLSLGAPNG | S |
| KGT43836.1 | alkaline serine protease [Bacillus<br>cereus]                  | 1515 | 42354 | 1270 | 862.795 | 2585.36 | 95.4 | 1.00E-09 | K | GTALQQAVQY<br>AWNK                        | G |

|            |                                                 |      |       |      |         |         |      |          |   |                                                      |   |
|------------|-------------------------------------------------|------|-------|------|---------|---------|------|----------|---|------------------------------------------------------|---|
| KGT43836.1 | alkaline serine protease [Bacillus cereus]      | 1515 | 42354 | 1272 | 863.074 | 2586.2  | 61.6 | 3.20E-06 | K | SSFSTYGSWVD<br>VAAPGSNIYSTY<br>K                     | G |
| KGT43836.1 | alkaline serine protease [Bacillus cereus]      | 1515 | 42354 | 1308 | 905.772 | 2714.29 | 64.7 | 1.00E-06 | R | KSSFSTYGSWV<br>DVAAPGSNIYS<br>TYK                    | G |
| KGT43836.1 | alkaline serine protease [Bacillus cereus]      | 1515 | 42354 | 1402 | 888.697 | 3550.76 | 60.8 | 3.50E-06 | K | GSTYQSLSGTS<br>MATPHVAGVA<br>ALLANQGYSNT<br>QIR      | Q |
| KGT43836.1 | alkaline serine protease [Bacillus cereus]      | 1515 | 42354 | 1185 | 1160.54 | 2319.06 | 3.35 | 1.9      | K | ANYPAYYSEVIA<br>VASTDQSDR                            | K |
| KGT43836.1 | alkaline serine protease [Bacillus cereus]      | 1515 | 42354 | 1424 | 976.02  | 3900.05 | 13   | 0.11     | K | VISLSLGAPNG<br>GTALQQAVQY<br>AWNKGSVIVA<br>AAGNAGNTK | A |
| KGT43955.1 | TPR repeat-containing protein [Bacillus cereus] | 19   | 2E+05 | 97   | 527.782 | 1053.55 | 18.6 | 0.039    | K | ETNTLSYVK                                            | N |
| KGT43959.1 | peptidase M36 [Bacillus cereus]                 | 44   | 54664 | 577  | 478.263 | 954.511 | 44.5 | 9.00E-05 | R | YIQLGFK                                              | N |
| KGT43959.1 | peptidase M36 [Bacillus cereus]                 | 53   | 54664 | 2539 | 973.936 | 1945.86 | 22   | 0.017    | K | VNVNGTTDDN<br>SFYSPSTK                               | A |
| KGT43959.1 | peptidase M36 [Bacillus cereus]                 | 53   | 54664 | 2940 | 811.39  | 2431.15 | 18.4 | 0.023    | K | VVVHSNNPFG<br>AWETFIDAENG<br>K                       | L |
| KGT43959.1 | peptidase M36 [Bacillus cereus]                 | 22   | 54664 | 277  | 665.873 | 1329.73 | 22.2 | 0.026    | K | VFLPNPVVSSG<br>SK                                    | V |
| KGT43959.1 | peptidase M36 [Bacillus cereus]                 | 61   | 54664 | 77   | 622.307 | 1242.6  | 61   | 3.70E-06 | K | STNLQFNYTR                                           | A |
| KGT43981.1 | penicillin-binding protein [Bacillus cereus]    | 27   | 54633 | 1535 | 636.672 | 1906.99 | 26.9 | 0.003    | M | SKIETPVMTSL<br>QTTVEK                                | M |
| KGT43981.1 | penicillin-binding protein [Bacillus cereus]    | 27   | 54633 | 825  | 622.823 | 1243.63 | 10.8 | 0.11     | K | EATESLPEQIK                                          | G |
| KGT43981.1 | penicillin-binding protein [Bacillus cereus]    | 27   | 54633 | 917  | 647.889 | 1293.76 | 2.28 | 0.59     | K | DLNVPGVAVA<br>VIK                                    | D |

|            |                                                                              |     |       |      |         |         |      |          |   |                                 |   |
|------------|------------------------------------------------------------------------------|-----|-------|------|---------|---------|------|----------|---|---------------------------------|---|
| KGT43981.1 | penicillin-binding protein [Bacillus cereus]                                 | 27  | 54633 | 1368 | 839.935 | 1677.86 | 0.8  | 1        | K | EAVTPNTRFAI<br>GSSTK            | A |
| KGT43981.1 | penicillin-binding protein [Bacillus cereus]                                 | 27  | 54633 | 1803 | 778.044 | 2331.11 | 6.71 | 0.23     | K | LEDYTGTFEHP<br>AYGTLQVYK        | R |
| KGT43998.1 | sporulation protein [Bacillus cereus]                                        | 49  | 35417 | 242  | 538.288 | 1074.56 | 34.9 | 0.0011   | R | SGPSTTSVIR                      | Q |
| KGT43998.1 | sporulation protein [Bacillus cereus]                                        | 49  | 35417 | 271  | 552.79  | 1103.57 | 33.6 | 0.003    | R | NGPSTSSSVIR                     | Q |
| KGT43998.1 | sporulation protein [Bacillus cereus]                                        | 49  | 35417 | 1124 | 710.36  | 2128.06 | 1.17 | 0.78     | K | LVIDAGHGGYD<br>SGAVGNGLVEK      | N |
| KGT44000.1 | D-amino acid aminotransferase [Bacillus cereus]                              | 38  | 33955 | 121  | 767.886 | 1533.76 | 37.6 | 0.00044  | R | GFQFGDGIYEV<br>FR               | L |
| KGT44011.1 | ethanol-active dehydrogenase/acetaldehyde-active reductase [Bacillus cereus] | 94  | 37364 | 681  | 574.807 | 1147.6  | 72   | 2.50E-07 | K | VAFNSAVDAVR                     | A |
| KGT44011.1 | ethanol-active dehydrogenase/acetaldehyde-active reductase [Bacillus cereus] | 94  | 37364 | 1408 | 585.684 | 1754.03 | 37.4 | 0.00018  | R | LVLDGIEVVGSL<br>VGTRK           | D |
| KGT44011.1 | ethanol-active dehydrogenase/acetaldehyde-active reductase [Bacillus cereus] | 94  | 37364 | 426  | 481.261 | 960.508 | 0.54 | 0.89     | K | IADDVTSLK                       | I |
| KGT44011.1 | ethanol-active dehydrogenase/acetaldehyde-active reductase [Bacillus cereus] | 94  | 37364 | 1306 | 813.975 | 1625.94 | 11.3 | 0.074    | R | LVLDGIEVVGSL<br>VGTR            | K |
| KGT44041.1 | lysine 2,3-aminomutase [Bacillus cereus]                                     | 23  | 54698 | 2197 | 830.95  | 1659.88 | 23.3 | 0.0066   | K | IALQPNYLISQS<br>ADK             | V |
| KGT44041.1 | lysine 2,3-aminomutase [Bacillus cereus]                                     | 23  | 54698 | 3027 | 666.58  | 2662.29 | 6.12 | 0.27     | K | TKYDLEDPLHE<br>DEDSPVPGLTH<br>R | Y |
| KGT44095.1 | formate--tetrahydrofolate ligase [Bacillus cereus]                           | 47  | 60599 | 2008 | 783.449 | 1564.88 | 46.8 | 2.80E-05 | K | VVLVTAINPTP<br>AGEGK            | S |
| KGT44095.1 | formate--tetrahydrofolate ligase [Bacillus cereus]                           | 422 | 60599 | 454  | 331.206 | 990.595 | 31.2 | 0.0014   | K | LSLDIFKR                        | L |

|            |                                  |     |       |      |         |         |      |          |             |                |
|------------|----------------------------------|-----|-------|------|---------|---------|------|----------|-------------|----------------|
|            | formate--tetrahydrofolate ligase |     |       |      |         |         |      |          | STVTVGLGQAF |                |
| KGT44095.1 | [Bacillus cereus]                | 422 | 60599 | 956  | 661.357 | 1320.7  | 49.2 | 2.40E-05 | K           | NK I           |
|            | formate--tetrahydrofolate ligase |     |       |      |         |         |      |          |             | SDIEIAQEASM    |
| KGT44095.1 | [Bacillus cereus]                | 422 | 60599 | 975  | 669.317 | 1336.62 | 39   | 0.00058  | K           | K              |
|            | formate--tetrahydrofolate ligase |     |       |      |         |         |      |          |             |                |
| KGT44095.1 | [Bacillus cereus]                | 422 | 60599 | 1032 | 458.604 | 1372.79 | 38   | 0.00041  | K           | LGRPSDFIVTIR E |
|            | formate--tetrahydrofolate ligase |     |       |      |         |         |      |          |             | NVVIGLGGPVQ    |
| KGT44095.1 | [Bacillus cereus]                | 422 | 60599 | 1137 | 731.433 | 1460.85 | 43.6 | 4.40E-05 | R           | GVPR E         |
|            | formate--tetrahydrofolate ligase |     |       |      |         |         |      |          |             | AAGIKPEAVVIV   |
| KGT44095.1 | [Bacillus cereus]                | 422 | 60599 | 1287 | 536.672 | 1607    | 37.5 | 0.00018  | R           | ATIR A         |
|            | formate--tetrahydrofolate ligase |     |       |      |         |         |      |          |             | IVVAYNFANQP    |
| KGT44095.1 | [Bacillus cereus]                | 422 | 60599 | 1344 | 831.968 | 1661.92 | 53.7 | 1.10E-05 | R           | VTVK D         |
|            | formate--tetrahydrofolate ligase |     |       |      |         |         |      |          |             | TVIALREPSLGP   |
| KGT44095.1 | [Bacillus cereus]                | 422 | 60599 | 1447 | 600.344 | 1798.01 | 34   | 0.0006   | K           | TMGLK G        |
|            | formate--tetrahydrofolate ligase |     |       |      |         |         |      |          |             | HVETIQSFGVP    |
| KGT44095.1 | [Bacillus cereus]                | 422 | 60599 | 1590 | 667.038 | 1998.09 | 50.4 | 2.30E-05 | K           | FVIAINK F      |
|            | formate--tetrahydrofolate ligase |     |       |      |         |         |      |          |             | FITDTDAEVTYL   |
| KGT44095.1 | [Bacillus cereus]                | 422 | 60599 | 1819 | 793.682 | 2378.02 | 43.8 | 8.70E-05 | K           | QEWCNER G      |
|            | formate--tetrahydrofolate ligase |     |       |      |         |         |      |          |             | EIEKGENNYAPL   |
| KGT44095.1 | [Bacillus cereus]                | 422 | 60599 | 1898 | 874.106 | 2619.29 | 46.4 | 7.10E-05 | K           | YELELPLEEK I   |
|            | formate--tetrahydrofolate ligase |     |       |      |         |         |      |          |             | ELKPSIGAGFIV   |
| KGT44095.1 | [Bacillus cereus]                | 422 | 60599 | 1908 | 892.162 | 2673.46 | 39.1 | 0.00025  | R           | ALTGTMLTMP     |
|            | formate--tetrahydrofolate ligase |     |       |      |         |         |      |          |             | GLPK Q         |
| KGT44095.1 | [Bacillus cereus]                | 445 | 60599 | 804  | 614.789 | 1227.56 | 10.9 | 0.25     | K           | TQYSLSDDATK L  |
|            | formate--tetrahydrofolate ligase |     |       |      |         |         |      |          |             | SDIEIAQEASM    |
| KGT44095.1 | [Bacillus cereus]                | 445 | 60599 | 1144 | 733.365 | 1464.72 | 4.59 | 0.37     | K           | KK I           |
|            | formate--tetrahydrofolate ligase |     |       |      |         |         |      |          |             | QPAALQMDVN     |
| KGT44095.1 | [Bacillus cereus]                | 445 | 60599 | 1217 | 766.361 | 1530.71 | 8.38 | 0.55     | K           | EDGK A         |
|            | formate--tetrahydrofolate ligase |     |       |      |         |         |      |          |             | KQLAQYEGEG     |
| KGT44095.1 | [Bacillus cereus]                | 445 | 60599 | 1788 | 772.028 | 2313.06 | 4.7  | 1.3      | R           | WSNLPVCMAT T   |
|            | formate--tetrahydrofolate ligase |     |       |      |         |         |      |          |             | IQEIAADLNILE   |
| KGT44095.1 | [Bacillus cereus]                | 445 | 60599 | 1871 | 858.759 | 2573.26 | 4.98 | 1.6      | K           | DELEPYGHHYK G  |

|            | Protein                                                             | Length | Score | Decomposition | Mass    | pI      | MW   | K <sub>d</sub> | Charge | Peptide      | Modifications |
|------------|---------------------------------------------------------------------|--------|-------|---------------|---------|---------|------|----------------|--------|--------------|---------------|
| KGT44189.1 | general stress protein [Bacillus cereus]                            | 88     | 16669 | 1363          | 667.366 | 1332.72 | 48.7 | 6.70E-05       | K      | KVANWNVLYV   | L             |
| KGT44189.1 | general stress protein [Bacillus cereus]                            | 28     | 16669 | 1131          | 729.854 | 1457.69 | 27.8 | 0.0077         | K      | EYLATSSVSEGT | E             |
| KGT44206.1 | peptide ABC transporter substrate-binding protein [Bacillus cereus] | 31     | 63050 | 1264          | 650.336 | 1298.66 | 30.7 | 0.0037         | R      | VFVNAMEGLY   | L             |
| KGT44206.1 | peptide ABC transporter substrate-binding protein [Bacillus cereus] | 31     | 63050 | 2028          | 787.419 | 1572.82 | 0.4  | 2.4            | K      | DTVKLDEINVS  | E             |
| KGT44206.1 | peptide ABC transporter substrate-binding protein [Bacillus cereus] | 31     | 63050 | 2659          | 1045.5  | 2088.99 | 20.1 | 0.049          | K      | ELGQDTITVELL | K             |
| KGT44206.1 | peptide ABC transporter substrate-binding protein [Bacillus cereus] | 251    | 63050 | 150           | 575.825 | 1149.63 | 37.5 | 0.00062        | R      | NDDNGSR      | Y             |
| KGT44206.1 | peptide ABC transporter substrate-binding protein [Bacillus cereus] | 251    | 63050 | 231           | 642.315 | 1282.62 | 75.7 | 7.90E-08       | R      | VILTSEFVDK   | T             |
| KGT44206.1 | peptide ABC transporter substrate-binding protein [Bacillus cereus] | 251    | 63050 | 333           | 489.945 | 1466.81 | 47   | 6.20E-05       | K      | AQDFVYAWQR   | A             |
| KGT44206.1 | peptide ABC transporter substrate-binding protein [Bacillus cereus] | 251    | 63050 | 451           | 885.899 | 1769.78 | 42.1 | 0.0002         | K      | VNKGELPADQL  | V             |
| KGT44206.1 | peptide ABC transporter substrate-binding protein [Bacillus cereus] | 251    | 63050 | 606           | 961.186 | 2880.53 | 58   | 3.30E-06       | K      | GVK          | F             |
| KGT44206.1 | peptide ABC transporter substrate-binding protein [Bacillus cereus] | 256    | 63050 | 88            | 516.26  | 1030.51 | 8.61 | 0.66           | R      | ETSTGVNLYDS  | I             |
| KGT44206.1 | peptide ABC transporter substrate-binding protein [Bacillus cereus] | 256    | 63050 | 141           | 565.329 | 1128.64 | 6.38 | 0.81           | K      | DQADR        | E             |
| KGT44206.1 | peptide ABC transporter substrate-binding protein [Bacillus cereus] | 256    | 63050 | 255           | 653.849 | 1305.68 | 19.6 | 0.074          | K      | ILIGQDAAISPT | N             |
| KGT44206.1 | peptide ABC transporter substrate-binding protein [Bacillus cereus] | 256    | 63050 | 358           | 757.354 | 1512.69 | 17.6 | 0.074          | K      | YGQSTAYLEKP  | W             |
| KGT44206.1 | peptide ABC transporter substrate-binding protein [Bacillus cereus] | 256    | 63050 | 559           | 1116.11 | 2230.2  | 3.83 | 1.5            | K      | FVK          | F             |
| KGT44207.1 | fosfomicin resistance protein FosB [Bacillus cereus]                | 23     | 16647 | 1370          | 669.323 | 1336.63 | 22.7 | 0.026          | K      | VGDFIKEELEK  | L             |

|            |                                                    |      |       |      |         |         |      |          |   |              |   |
|------------|----------------------------------------------------|------|-------|------|---------|---------|------|----------|---|--------------|---|
| KGT44285.1 | Xaa-Pro aminopeptidase [Bacillus cereus]           | 59   | 48653 | 1684 | 722.878 | 1443.74 | 59.2 | 2.80E-06 | K | AIGLIQEDEELS |   |
| KGT44285.1 | Xaa-Pro aminopeptidase [Bacillus cereus]           | 59   | 48653 | 1783 | 738.872 | 1475.73 | 2.73 | 0.93     | K | WVGKTVSNEE   | Y |
| KGT44292.1 | FMN-dependent NADH-azoreductase [Bacillus cereus]  | 18   | 25530 | 577  | 478.263 | 954.511 | 18.2 | 0.038    | M | AEK          | I |
| KGT44292.1 | FMN-dependent NADH-azoreductase [Bacillus cereus]  | 18   | 25530 | 790  | 551.784 | 1101.55 | 0.5  | 1        | - | GLFSSLFGK    | K |
| KGT44393.1 | MFS transporter [Bacillus cereus]                  | 18   | 65005 | 464  | 394.244 | 786.473 | 10.1 | 0.47     | K | MGLFSSLFGK   | K |
| KGT44393.1 | MFS transporter [Bacillus cereus]                  | 18   | 65005 | 999  | 598.333 | 1194.65 | 17.6 | 0.053    | R | KEELIR       | D |
| KGT44441.1 | hypothetical protein IY08_08475 [Bacillus cereus]  | 20   | 33589 | 478  | 504.24  | 1006.47 | 20.3 | 0.043    | R | KIHNPMVNLK   | L |
| KGT44446.1 | fumarate hydratase [Bacillus cereus]               | 14   | 50380 | 352  | 688.373 | 687.365 | 13.6 | 0.053    | K | GMNQSVMQAR   | S |
| KGT44446.1 | fumarate hydratase [Bacillus cereus]               | 14   | 50380 | 565  | 474.745 | 947.475 | 6.7  | 0.68     | K | MIAPKE       | - |
| KGT44465.1 | RNA polymerase sigma factor SigW [Bacillus cereus] | 14   | 13520 | 166  | 595.802 | 1189.59 | 14.2 | 0.23     | K | KSAALSNQK    | L |
| KGT44484.1 | flagellin [Bacillus cereus]                        | 1476 | 39119 | 722  | 532.262 | 1062.51 | 64.8 | 8.40E-07 | R | LRELPENYR    | D |
| KGT44484.1 | flagellin [Bacillus cereus]                        | 1476 | 39119 | 1440 | 678.841 | 1355.67 | 78.3 | 6.50E-08 | K | INTNINSMR    | T |
| KGT44484.1 | flagellin [Bacillus cereus]                        | 1476 | 39119 | 1791 | 738.878 | 1475.74 | 85.2 | 2.10E-08 | K | ANDAGAQAAA   |   |
| KGT44484.1 | flagellin [Bacillus cereus]                        | 1476 | 39119 | 2024 | 787.391 | 1572.77 | 130  | 5.50E-13 | R | QALGK        | E |
| KGT44484.1 | flagellin [Bacillus cereus]                        | 1476 | 39119 | 2068 | 796.41  | 1590.8  | 77.1 | 6.50E-08 | R | TIAVQTLDNAD  |   |
| KGT44484.1 | flagellin [Bacillus cereus]                        | 1476 | 39119 | 2535 | 648.981 | 1943.92 | 42.7 | 9.90E-05 | K | TSK          | Q |
| KGT44484.1 | flagellin [Bacillus cereus]                        | 1476 | 39119 | 2684 | 707.341 | 2119    | 31.5 | 0.0011   | K | INNASDDAAGL  |   |
| KGT44484.1 | flagellin [Bacillus cereus]                        | 1476 | 39119 | 2912 | 787.733 | 2360.18 | 51.3 | 2.90E-05 | K | AIATR        | M |
| KGT44484.1 | flagellin [Bacillus cereus]                        | 1476 | 39119 | 2912 | 787.733 | 2360.18 | 51.3 | 2.90E-05 | K | TADSAMNSVS   |   |
| KGT44484.1 | flagellin [Bacillus cereus]                        | 1476 | 39119 | 2912 | 787.733 | 2360.18 | 51.3 | 2.90E-05 | K | NILLR        | M |
| KGT44484.1 | flagellin [Bacillus cereus]                        | 1476 | 39119 | 2912 | 787.733 | 2360.18 | 51.3 | 2.90E-05 | K | EQIDYISTNTEF |   |
| KGT44484.1 | flagellin [Bacillus cereus]                        | 1476 | 39119 | 2912 | 787.733 | 2360.18 | 51.3 | 2.90E-05 | K | NDKK         | L |
| KGT44484.1 | flagellin [Bacillus cereus]                        | 1476 | 39119 | 2912 | 787.733 | 2360.18 | 51.3 | 2.90E-05 | K | LEDYNKANDA   |   |
| KGT44484.1 | flagellin [Bacillus cereus]                        | 1476 | 39119 | 2912 | 787.733 | 2360.18 | 51.3 | 2.90E-05 | K | GAQAAAQALG   |   |
| KGT44484.1 | flagellin [Bacillus cereus]                        | 1476 | 39119 | 2912 | 787.733 | 2360.18 | 51.3 | 2.90E-05 | K | K            | E |
| KGT44484.1 | flagellin [Bacillus cereus]                        | 1476 | 39119 | 2912 | 787.733 | 2360.18 | 51.3 | 2.90E-05 | K | ILNEAGISMLSQ |   |
| KGT44484.1 | flagellin [Bacillus cereus]                        | 1476 | 39119 | 2912 | 787.733 | 2360.18 | 51.3 | 2.90E-05 | K | ANQTPQMVSQ   | L |

|            |                             |      |       |      |         |         |      |          |            |                |
|------------|-----------------------------|------|-------|------|---------|---------|------|----------|------------|----------------|
|            |                             |      |       |      |         |         |      |          | MRDLANQSAN |                |
|            |                             |      |       |      |         |         |      |          | GTNTNENQAA |                |
| KGT44484.1 | flagellin [Bacillus cereus] | 1476 | 39119 | 2955 | 825.725 | 2474.15 | 59.8 | 4.60E-06 | R          | LNK E          |
| KGT44484.1 | flagellin [Bacillus cereus] | 1490 | 39119 | 63   | 491.243 | 490.235 | 4.8  | 0.35     | K          | TGADK A        |
|            |                             |      |       |      |         |         |      |          |            | RINNASDDAAG    |
| KGT44484.1 | flagellin [Bacillus cereus] | 1490 | 39119 | 2284 | 577.312 | 1728.91 | 13   | 0.071    | K          | LAIATR M       |
|            |                             |      |       |      |         |         |      |          |            | DLANQSANGT     |
|            |                             |      |       |      |         |         |      |          |            | NTNENQAALN     |
| KGT44484.1 | flagellin [Bacillus cereus] | 1490 | 39119 | 3081 | 964.789 | 2891.35 | 19.6 | 0.039    | R          | KEFDALK E      |
|            |                             |      |       |      |         |         |      |          |            |                |
| KGT44484.1 | flagellin [Bacillus cereus] | 91   | 39119 | 966  | 665.869 | 1329.72 | 5.9  | 1.2      | K          | QININLSNVSTK E |
|            |                             |      |       |      |         |         |      |          |            | ANASGAIASIDT   |
| KGT44484.1 | flagellin [Bacillus cereus] | 91   | 39119 | 1068 | 701.881 | 1401.75 | 4.44 | 1.1      | K          | ALK N          |
|            |                             |      |       |      |         |         |      |          |            | QNQAKMSNA      |
| KGT44484.1 | flagellin [Bacillus cereus] | 91   | 39119 | 1097 | 713.33  | 1424.65 | 4.46 | 1.3      | R          | MDR L          |
|            |                             |      |       |      |         |         |      |          |            | ESGLGVAANNT    |
| KGT44484.1 | flagellin [Bacillus cereus] | 226  | 39119 | 488  | 958.001 | 1913.99 | 24.9 | 0.0046   | R          | QDGISLIR T     |
|            |                             |      |       |      |         |         |      |          |            | ARESGLGVAAN    |
| KGT44484.1 | flagellin [Bacillus cereus] | 226  | 39119 | 538  | 714.716 | 2141.13 | 31.2 | 0.0031   | R          | NTQDGISLIR T   |
| KGT44484.1 | flagellin [Bacillus cereus] | 240  | 39119 | 44   | 588.297 | 587.29  | 8.67 | 0.3      | R          | QNQAK M        |
|            |                             |      |       |      |         |         |      |          |            | ELGLDTLSIGTD   |
| KGT44484.1 | flagellin [Bacillus cereus] | 240  | 39119 | 435  | 573.313 | 1716.92 | 9.94 | 0.37     | K          | KVEK T         |
|            |                             |      |       |      |         |         |      |          |            | ATLGATLNRLD    |
| KGT44484.1 | flagellin [Bacillus cereus] | 240  | 39119 | 501  | 658.697 | 1973.07 | 23.8 | 0.012    | R          | FNVNNLK S      |
|            |                             |      |       |      |         |         |      |          |            | LETTDLKANAS    |
| KGT44484.1 | flagellin [Bacillus cereus] | 240  | 39119 | 552  | 735.068 | 2202.18 | 10.9 | 0.18     | K          | GAIASIDTALK N  |
|            |                             |      |       |      |         |         |      |          |            | ANASGAIASIDT   |
| KGT44484.1 | flagellin [Bacillus cereus] | 194  | 39119 | 1063 | 687.036 | 2058.09 | 7    | 0.77     | K          | ALKNIASNR A    |
| KGT44484.1 | flagellin [Bacillus cereus] | 1518 | 39119 | 7    | 458.763 | 915.511 | 27.2 | 0.005    | R          | ATLGATLNR L    |
| KGT44484.1 | flagellin [Bacillus cereus] | 1518 | 39119 | 26   | 538.782 | 1075.55 | 41   | 0.00057  | R          | LDFNVNNLK S    |
|            |                             |      |       |      |         |         |      |          |            | AAFDADVTA      |
| KGT44484.1 | flagellin [Bacillus cereus] | 1518 | 39119 | 64   | 605.793 | 1209.57 | 24.6 | 0.005    | K          | MK E           |
| KGT44484.1 | flagellin [Bacillus cereus] | 1518 | 39119 | 79   | 626.816 | 1251.62 | 54.3 | 2.00E-05 | K          | IETKLEDYNK A   |



|            |                                              |      |       |      |         |         |      |          |   |                                   |   |
|------------|----------------------------------------------|------|-------|------|---------|---------|------|----------|---|-----------------------------------|---|
| KGT44484.1 | flagellin [Bacillus cereus]                  | 1518 | 39119 | 124  | 681.363 | 1360.71 | 47.7 | 4.60E-05 | K | ELGLDTLSIGTD<br>K                 | V |
| KGT44484.1 | flagellin [Bacillus cereus]                  | 1518 | 39119 | 194  | 577.276 | 1728.81 | 72   | 2.20E-07 | K | AAFDADVTAA<br>MKEFDK              | V |
| KGT44484.1 | flagellin [Bacillus cereus]                  | 1518 | 39119 | 258  | 1015.94 | 2029.86 | 45.7 | 3.50E-05 | K | SQSSSMASAAS<br>QIEDADMAK          | E |
| KGT44484.1 | flagellin [Bacillus cereus]                  | 1518 | 39119 | 286  | 716.374 | 2146.1  | 115  | 1.70E-11 | K | ANDAGAQAAA<br>QALGKEFATLT<br>K    | L |
| KGT44484.1 | flagellin [Bacillus cereus]                  | 1518 | 39119 | 295  | 1094.51 | 2187.01 | 60.7 | 4.20E-06 | R | DLANQSANGT<br>NTNENQAALN<br>K     | E |
| KGT44496.1 | aminotransferase [Bacillus cereus]           | 45   | 50550 | 2807 | 735.702 | 2204.08 | 31.3 | 0.0012   | K | QLQTLSYFPMS<br>QSHEPAIK           | L |
| KGT44496.1 | aminotransferase [Bacillus cereus]           | 39   | 50550 | 383  | 712.878 | 2847.48 | 38.8 | 0.00043  | R | SAQMGSLLLEQ<br>LKDEIGEHLVG<br>DIR | G |
| KGT44639.1 | glutamate dehydrogenase [Bacillus cereus]    | 63   | 47646 | 601  | 490.276 | 978.537 | 63.1 | 2.30E-06 | R |                                   | K |
| KGT44639.1 | glutamate dehydrogenase [Bacillus cereus]    | 69   | 47646 | 318  | 661.323 | 660.315 | 25.5 | 0.016    | K | TQQQR                             | E |
| KGT44639.1 | glutamate dehydrogenase [Bacillus cereus]    | 53   | 47646 | 1179 | 747.405 | 1492.8  | 30.9 | 0.003    | R | VVVQGFGNAG<br>SFLAK               | F |
| KGT44639.1 | glutamate dehydrogenase [Bacillus cereus]    | 53   | 47646 | 1561 | 645.021 | 1932.04 | 39.9 | 0.00027  | K | LGYPNEVYELLK<br>EPIR              | M |
| KGT44639.1 | glutamate dehydrogenase [Bacillus cereus]    | 53   | 47646 | 1827 | 600.323 | 2397.26 | 8.93 | 0.4      | R | IDEFNSPGFITG<br>KPLVLGGSHGR       | E |
| KGT44691.1 | ATP-dependent DNA helicase [Bacillus cereus] | 20   | 1E+05 | 1032 | 458.604 | 1372.79 | 20.3 | 0.024    | K | MAESLQLLVLE<br>K                  | N |
| KGT44694.1 | aspartate aminotransferase [Bacillus cereus] | 21   | 43365 | 465  | 603.326 | 1806.96 | 21   | 0.042    | K | AVIINSPSNPTG<br>MIYSK             | E |
| KGT44711.1 | peptidase M32 [Bacillus cereus]              | 49   | 59123 | 1450 | 601.312 | 1800.91 | 38.1 | 0.00044  | R | IEADELTYPHVV<br>MVR               | Y |

|            |                                  |     |       |      |         |         |      |          |   |              |   |
|------------|----------------------------------|-----|-------|------|---------|---------|------|----------|---|--------------|---|
|            |                                  |     |       |      |         |         |      |          |   | QLNYDFEAGRL  |   |
|            |                                  |     |       |      |         |         |      |          |   | DETVHPFEITLN |   |
| KGT44711.1 | peptidase M32 [Bacillus cereus]  | 49  | 59123 | 1969 | 720.112 | 2876.42 | 26.2 | 0.0035   | K | R            | G |
|            |                                  |     |       |      |         |         |      |          |   | YELEKELFDGTL |   |
| KGT44711.1 | peptidase M32 [Bacillus cereus]  | 53  | 59123 | 1461 | 604.655 | 1810.94 | 4.42 | 0.38     | R | QVK          | D |
| KGT44822.1 | signal peptide protein [Bacillus | 15  | 17105 | 457  | 390.235 | 778.456 | 15   | 0.05     | R | YKVEIK       | G |
|            |                                  |     |       |      |         |         |      |          |   | VAFSDDAEGTP  |   |
| KGT44832.1 | peptidase M6 [Bacillus cereus]   | 192 | 86674 | 1816 | 739.359 | 1476.7  | 75.5 | 8.40E-08 | K | QLK          | L |
|            |                                  |     |       |      |         |         |      |          |   | WTVGPKPFPIE  |   |
| KGT44832.1 | peptidase M6 [Bacillus cereus]   | 192 | 86674 | 2325 | 585.988 | 1754.94 | 67.8 | 7.30E-07 | R | GTQAK        | V |
|            |                                  |     |       |      |         |         |      |          |   | NQPDGLIDHL   |   |
|            |                                  |     |       |      |         |         |      |          |   | MIIHAGVGQEA  |   |
| KGT44832.1 | peptidase M6 [Bacillus cereus]   | 192 | 86674 | 2988 | 636.571 | 2542.25 | 31.3 | 0.0032   | K | GGGK         | L |
| KGT44832.1 | peptidase M6 [Bacillus cereus]   | 201 | 86674 | 474  | 400.734 | 799.453 | 14   | 0.14     | K | WLTVP GK     | A |
|            |                                  |     |       |      |         |         |      |          |   | FEVVGQADDN   |   |
| KGT44832.1 | peptidase M6 [Bacillus cereus]   | 201 | 86674 | 2157 | 817.893 | 1633.77 | 15.3 | 0.038    | K | SAGAVR       | L |
|            |                                  |     |       |      |         |         |      |          |   | GIGLATYLDQS  |   |
| KGT44832.1 | peptidase M6 [Bacillus cereus]   | 80  | 86674 | 147  | 733.398 | 1464.78 | 40.5 | 0.00038  | K | VTK          | S |
|            |                                  |     |       |      |         |         |      |          |   | MLFGNEPFTLD  |   |
| KGT44832.1 | peptidase M6 [Bacillus cereus]   | 80  | 86674 | 316  | 763.708 | 2288.1  | 58.1 | 5.00E-06 | K | DGSKIETFK    | Q |
| KGT44832.1 | peptidase M6 [Bacillus cereus]   | 80  | 86674 | 18   | 524.26  | 1046.5  | 0.2  | 3.9      | K | EAANGDQLTK   | D |
|            | oligoendopeptidase F [Bacillus   |     |       |      |         |         |      |          |   | ALINSPFREELE |   |
| KGT44885.1 | cereus]                          | 67  | 66437 | 1592 | 667.346 | 1999.02 | 50.2 | 4.70E-05 | K | AYYGK        | Q |
|            |                                  |     |       |      |         |         |      |          |   | APFIFSNFNGTS |   |
|            | oligoendopeptidase F [Bacillus   |     |       |      |         |         |      |          |   | GDIDVLTHEAG  |   |
| KGT44885.1 | cereus]                          | 67  | 66437 | 2070 | 882.428 | 3525.68 | 35.6 | 0.00094  | K | HAFQVYESR    | K |
| KGT44885.1 | oligoendopeptidase F [Bacillus   | 67  | 66437 | 561  | 534.782 | 1067.55 | 9.25 | 0.45     | K | NFVELGYAR    | M |
| KGT44885.1 | oligoendopeptidase F [Bacillus   | 67  | 66437 | 919  | 648.818 | 1295.62 | 12   | 0.33     | K | QLFALAECDLK  | T |
|            | oligoendopeptidase F [Bacillus   |     |       |      |         |         |      |          |   | TLSQLIPFMQG  |   |
| KGT44885.1 | cereus]                          | 67  | 66437 | 1019 | 681.878 | 1361.74 | 5.39 | 1.2      | R | K            | E |
|            | oligoendopeptidase F [Bacillus   |     |       |      |         |         |      |          |   | TDYNAEMVAN   |   |
| KGT44885.1 | cereus]                          | 67  | 66437 | 1121 | 723.818 | 1445.62 | 16.1 | 0.048    | R | YR           | Q |

|            |                                                               |     |       |      |         |         |      |          |   |                                       |   |
|------------|---------------------------------------------------------------|-----|-------|------|---------|---------|------|----------|---|---------------------------------------|---|
| KGT44885.1 | oligoendopeptidase F [Bacillus cereus]                        | 67  | 66437 | 1534 | 634.696 | 1901.07 | 3.42 | 0.91     | R | QQVLDYIVPVT<br>TELRK                  | R |
| KGT44885.1 | oligoendopeptidase F [Bacillus cereus]                        | 67  | 66437 | 2068 | 879.914 | 3515.63 | 13.3 | 0.18     | R | HSVDTTDTFYK<br>EEQDFDEFSP<br>VVQGYGTK | Y |
| KGT44889.1 | 7-cyano-7-deazaguanine synthase [Bacillus cereus]             | 16  | 24892 | 117  | 531.295 | 530.288 | 16.1 | 0.036    | K | QVGAR<br>DGAMQVNQN                    | H |
| KGT45013.1 | catalase [Bacillus cereus]                                    | 112 | 56040 | 2721 | 1060.99 | 2119.97 | 73   | 2.00E-07 | R | PSTINYPEPSR                           | H |
| KGT45013.1 | catalase [Bacillus cereus]                                    | 115 | 56040 | 571  | 475.745 | 949.475 | 18.2 | 0.02     | R | DLFDAIEK<br>LTTNQGAPVG                | G |
| KGT45013.1 | catalase [Bacillus cereus]                                    | 112 | 56040 | 424  | 836.403 | 1670.79 | 26.7 | 0.0098   | R | DNQNSR<br>AAFLQNEGTT                  | T |
| KGT45013.1 | catalase [Bacillus cereus]                                    | 112 | 56040 | 455  | 889.963 | 1777.91 | 90.9 | 4.70E-09 | K | PVFVR<br>LGANYLQIPVN<br>CPYAAVQNQQ    | F |
| KGT45013.1 | catalase [Bacillus cereus]                                    | 112 | 56040 | 577  | 836.086 | 2505.24 | 32.7 | 0.0025   | R | R                                     | D |
| KGT45013.1 | catalase [Bacillus cereus]                                    | 124 | 56040 | 136  | 563.784 | 1125.55 | 24.6 | 0.016    | R | LFSYPDTQR                             | Y |
| KGT45013.1 | catalase [Bacillus cereus]                                    | 124 | 56040 | 140  | 564.791 | 1127.57 | 13.9 | 0.17     | K | LLAVCNFFR<br>RGPVLLEDYHL              | A |
| KGT45013.1 | catalase [Bacillus cereus]                                    | 124 | 56040 | 423  | 556.641 | 1666.9  | 25.6 | 0.011    | R | VEK<br>FSTVIHGQGSP                    | L |
| KGT45013.1 | catalase [Bacillus cereus]                                    | 124 | 56040 | 497  | 652.332 | 1953.97 | 8.79 | 0.83     | R | ETARDPR<br>FYTEEGNYDIV                | G |
| KGT45013.1 | catalase [Bacillus cereus]                                    | 124 | 56040 | 583  | 844.086 | 2529.24 | 12.1 | 0.37     | K | GNHLPVFFIR<br>KGETLAIVGESG            | D |
| KGT45041.1 | peptide ABC transporter ATP-binding protein [Bacillus cereus] | 47  | 38083 | 1656 | 716.884 | 1431.75 | 47   | 4.00E-05 | K | SGK<br>QRVVIAMALAC                    | S |
| KGT45041.1 | peptide ABC transporter ATP-binding protein [Bacillus cereus] | 47  | 38083 | 2035 | 788.89  | 1575.76 | 2.44 | 0.59     | R | NPK<br>MTVGDIIAEGI                    | L |
| KGT45042.1 | peptide ABC transporter ATP-binding protein [Bacillus cereus] | 36  | 35328 | 892  | 623.669 | 1867.99 | 36.1 | 0.001    | R | DIHGLAK<br>SLLSAIPLDPD                | S |
| KGT45042.1 | peptide ABC transporter ATP-binding protein [Bacillus cereus] | 36  | 35328 | 765  | 843.455 | 1684.9  | 18.1 | 0.073    | K | YER                                   | N |

|            |                                                                     |     |       |      |         |         |      |          |   |              |   |
|------------|---------------------------------------------------------------------|-----|-------|------|---------|---------|------|----------|---|--------------|---|
| KGT45042.1 | peptide ABC transporter ATP-binding protein [Bacillus cereus]       | 36  | 35328 | 1084 | 694.313 | 2079.92 | 16.8 | 0.065    | R | IVYDPSQHNYG  | E |
| KGT45044.1 | peptide ABC transporter substrate-binding protein [Bacillus cereus] | 498 | 62003 | 1142 | 627.853 | 1253.69 | 49.6 | 2.80E-05 | R | SEAPTMR      | E |
| KGT45044.1 | peptide ABC transporter substrate-binding protein [Bacillus cereus] | 498 | 62003 | 1969 | 772.376 | 1542.74 | 93.7 | 2.10E-09 | R | AVNGDIVKPNV  | E |
| KGT45044.1 | peptide ABC transporter substrate-binding protein [Bacillus cereus] | 498 | 62003 | 2412 | 912.436 | 1822.86 | 30.5 | 0.0044   | K | K            | E |
| KGT45044.1 | peptide ABC transporter substrate-binding protein [Bacillus cereus] | 501 | 62003 | 586  | 481.25  | 960.485 | 7.05 | 1.5      | K | VMTNTMEGLY   | D |
| KGT45044.1 | peptide ABC transporter substrate-binding protein [Bacillus cereus] | 355 | 62003 | 495  | 510.796 | 1019.58 | 29   | 0.0046   | R | SLGK         | D |
| KGT45044.1 | peptide ABC transporter substrate-binding protein [Bacillus cereus] | 355 | 62003 | 575  | 542.764 | 1083.51 | 38   | 0.00054  | K | DTSTPINLYETN | A |
| KGT45044.1 | peptide ABC transporter substrate-binding protein [Bacillus cereus] | 355 | 62003 | 778  | 404.566 | 1210.68 | 58.1 | 3.90E-06 | R | AIDR         | A |
| KGT45044.1 | peptide ABC transporter substrate-binding protein [Bacillus cereus] | 355 | 62003 | 861  | 633.833 | 1265.65 | 24.9 | 0.0061   | K | KDGSDVNAR    | W |
| KGT45044.1 | peptide ABC transporter substrate-binding protein [Bacillus cereus] | 355 | 62003 | 1065 | 699.388 | 1396.76 | 49.6 | 4.60E-05 | R | KAISLAFDR    | K |
| KGT45044.1 | peptide ABC transporter substrate-binding protein [Bacillus cereus] | 355 | 62003 | 1283 | 802.43  | 1602.84 | 27.9 | 0.0089   | K | DFVYAWQR     | A |
| KGT45044.1 | peptide ABC transporter substrate-binding protein [Bacillus cereus] | 355 | 62003 | 1581 | 662.674 | 1985    | 44.6 | 0.00013  | K | LNQKDPALANK  | N |
| KGT45044.1 | peptide ABC transporter substrate-binding protein [Bacillus cereus] | 355 | 62003 | 1831 | 806.427 | 2416.26 | 28.8 | 0.0063   | K | TGEYLKGELEK  | N |
| KGT45044.1 | peptide ABC transporter substrate-binding protein [Bacillus cereus] | 355 | 62003 | 1954 | 933.475 | 2797.4  | 26.9 | 0.0092   | K | ASLLAEFIDKYK | G |
| KGT45044.1 | peptide ABC transporter substrate-binding protein [Bacillus cereus] | 359 | 62003 | 580  | 363.216 | 1086.63 | 3.33 | 2        | K | MLLDDAAIVPV  | G |
| KGT45044.1 | peptide ABC transporter substrate-binding protein [Bacillus cereus] | 359 | 62003 | 609  | 553.809 | 1105.6  | 13.8 | 0.23     | R | YQR          | G |
| KGT45044.1 | peptide ABC transporter substrate-binding protein [Bacillus cereus] | 355 | 62003 | 1954 | 933.475 | 2797.4  | 26.9 | 0.0092   | K | GKPDFQTVEDT  | L |
| KGT45044.1 | peptide ABC transporter substrate-binding protein [Bacillus cereus] | 355 | 62003 | 1954 | 933.475 | 2797.4  | 26.9 | 0.0092   | K | SVFFLR       | L |
| KGT45044.1 | peptide ABC transporter substrate-binding protein [Bacillus cereus] | 355 | 62003 | 1954 | 933.475 | 2797.4  | 26.9 | 0.0092   | K | NLLEAEKMLLD  | G |
| KGT45044.1 | peptide ABC transporter substrate-binding protein [Bacillus cereus] | 355 | 62003 | 1954 | 933.475 | 2797.4  | 26.9 | 0.0092   | K | DAAIVPVYQR   | G |
| KGT45044.1 | peptide ABC transporter substrate-binding protein [Bacillus cereus] | 355 | 62003 | 1954 | 933.475 | 2797.4  | 26.9 | 0.0092   | K | QVINLIETQEIP | V |
| KGT45044.1 | peptide ABC transporter substrate-binding protein [Bacillus cereus] | 355 | 62003 | 1954 | 933.475 | 2797.4  | 26.9 | 0.0092   | K | TMDPALSADA   | V |
| KGT45044.1 | peptide ABC transporter substrate-binding protein [Bacillus cereus] | 355 | 62003 | 1954 | 933.475 | 2797.4  | 26.9 | 0.0092   | K | VSSR         | V |
| KGT45044.1 | peptide ABC transporter substrate-binding protein [Bacillus cereus] | 355 | 62003 | 1954 | 933.475 | 2797.4  | 26.9 | 0.0092   | K | IKQQPFAQK    | L |
| KGT45044.1 | peptide ABC transporter substrate-binding protein [Bacillus cereus] | 355 | 62003 | 1954 | 933.475 | 2797.4  | 26.9 | 0.0092   | K | ASLLAEFIDK   | Y |

|            |                                                                     |     |       |      |         |         |      |         |   |                                                        |   |
|------------|---------------------------------------------------------------------|-----|-------|------|---------|---------|------|---------|---|--------------------------------------------------------|---|
| KGT45044.1 | peptide ABC transporter substrate-binding protein [Bacillus cereus] | 359 | 62003 | 644  | 560.272 | 1118.53 | 21.5 | 0.036   | K | EMSPDQLGVK                                             | A |
| KGT45044.1 | peptide ABC transporter substrate-binding protein [Bacillus cereus] | 359 | 62003 | 645  | 560.275 | 1118.54 | 13.2 | 0.23    | K | SAYIMYDIK                                              | N |
| KGT45044.1 | peptide ABC transporter substrate-binding protein [Bacillus cereus] | 359 | 62003 | 1789 | 772.076 | 2313.21 | 18.1 | 0.051   | K | ELGKNEIELELL<br>NEDVELSK<br>KPFVDTLNNG<br>SKPATGLIPDNF | K |
| KGT45044.1 | peptide ABC transporter substrate-binding protein [Bacillus cereus] | 359 | 62003 | 1919 | 675.873 | 2699.46 | 17.2 | 0.041   | R | IK                                                     | G |
| KGT45044.1 | peptide ABC transporter substrate-binding protein [Bacillus cereus] | 801 | 62003 | 173  | 602.839 | 1203.66 | 31.9 | 0.0038  | K | IEEVNFNIVK                                             | D |
| KGT45044.1 | peptide ABC transporter substrate-binding protein [Bacillus cereus] | 801 | 62003 | 362  | 506.253 | 1515.74 | 27.4 | 0.0091  | K | YSNPKYDEIIMK                                           | A |
| KGT45044.1 | peptide ABC transporter substrate-binding protein [Bacillus cereus] | 815 | 62003 | 66   | 443.721 | 885.428 | 21.8 | 0.02    | K | YGGDLSFK                                               | W |
| KGT45044.1 | peptide ABC transporter substrate-binding protein [Bacillus cereus] | 815 | 62003 | 541  | 718.685 | 2153.03 | 7.63 | 1.1     | K | WSNGEPVTAK<br>DFVYAWQR                                 | A |
| KGT45052.1 | oligopeptidase PepB [Bacillus cereus]                               | 114 | 70202 | 1051 | 691.832 | 1381.65 | 42.8 | 0.00025 | R | YIQFLESDDPR                                            | V |
| KGT45052.1 | oligopeptidase PepB [Bacillus cereus]                               | 114 | 70202 | 1125 | 724.387 | 1446.76 | 41.6 | 0.00013 | K | LNELEALLFEEL                                           | - |
| KGT45052.1 | oligopeptidase PepB [Bacillus cereus]                               | 114 | 70202 | 1224 | 513.278 | 1536.81 | 35.7 | 0.0013  | R | LYLLNHYLEGFR                                           | G |
| KGT45052.1 | oligopeptidase PepB [Bacillus cereus]                               | 114 | 70202 | 1357 | 558.948 | 1673.82 | 25.3 | 0.0043  | R | DLSVYEHALEEI                                           |   |
| KGT45052.1 | oligopeptidase PepB [Bacillus cereus]                               | 129 | 70202 | 457  | 497.231 | 992.447 | 1.44 | 2.3     | R | TR                                                     | Q |
| KGT45052.1 | oligopeptidase PepB [Bacillus cereus]                               | 129 | 70202 | 787  | 608.804 | 1215.59 | 8.6  | 0.64    | K | NNFNARVR                                               | K |
| KGT45052.1 | oligopeptidase PepB [Bacillus cereus]                               | 129 | 70202 | 1024 | 684.859 | 1367.7  | 16.5 | 0.095   | K | AGVDMASPEP                                             |   |
| KGT45052.1 | oligopeptidase PepB [Bacillus cereus]                               | 129 | 70202 | 1071 | 469.59  | 1405.75 | 23.2 | 0.01    | K | VK                                                     | E |
| KGT45052.1 | oligopeptidase PepB [Bacillus cereus]                               | 129 | 70202 | 1257 | 789.426 | 1576.84 | 22.7 | 0.027   | K | QILEEGQPAVE                                            |   |
| KGT45052.1 | oligopeptidase PepB [Bacillus cereus]                               | 129 | 70202 | 1257 | 789.426 | 1576.84 | 22.7 | 0.027   | K | R                                                      | Y |
| KGT45052.1 | oligopeptidase PepB [Bacillus cereus]                               | 129 | 70202 | 1257 | 789.426 | 1576.84 | 22.7 | 0.027   | K | AGSSDYPIEVLK                                           |   |
| KGT45052.1 | oligopeptidase PepB [Bacillus cereus]                               | 129 | 70202 | 1257 | 789.426 | 1576.84 | 22.7 | 0.027   | K | K                                                      | A |
| KGT45052.1 | oligopeptidase PepB [Bacillus cereus]                               | 129 | 70202 | 1257 | 789.426 | 1576.84 | 22.7 | 0.027   | K | SLNVLGDEYVDI                                           |   |
| KGT45052.1 | oligopeptidase PepB [Bacillus cereus]                               | 129 | 70202 | 1257 | 789.426 | 1576.84 | 22.7 | 0.027   | K | LK                                                     | E |

|            |                                    |     |       |      |         |         |      |          |             |              |
|------------|------------------------------------|-----|-------|------|---------|---------|------|----------|-------------|--------------|
|            | oligopeptidase PepB [Bacillus      |     |       |      |         |         |      |          | LEDIFQTDAEW |              |
| KGT45052.1 | cereus]                            | 129 | 70202 | 1807 | 780.72  | 2339.14 | 19.4 | 0.015    | R           | EKEFQAIK E   |
| KGT45075.1 | ATPase [Bacillus cereus]           | 19  | 34257 | 296  | 369.675 | 737.335 | 19.1 | 0.036    | R           | QAYEAR E     |
| KGT45075.1 | ATPase [Bacillus cereus]           | 19  | 34257 | 618  | 556.318 | 1110.62 | 1.15 | 1.7      | K           | IQLIRGMHK N  |
| KGT45076.1 | helicase [Bacillus cereus]         | 23  | 89741 | 827  | 623.805 | 1245.6  | 23.1 | 0.021    | K           | ASTQFFEMIR A |
| KGT45090.1 | membrane protein [Bacillus cereus] | 25  | 55598 | 385  | 458.27  | 914.526 | 24.9 | 0.022    | R           | ISQGLLER K   |
|            | antifungal polypeptide [Bacillus   |     |       |      |         |         |      |          |             | ITGTWVTGEYV  |
| KGT45109.1 | cereus]                            | 173 | 12745 | 2737 | 709.676 | 2126.01 | 57   | 4.50E-06 | K           | QGHYSNSK Q   |
|            | hypothetical protein IY08_04860    |     |       |      |         |         |      |          |             |              |
| KGT45111.1 | [Bacillus cereus]                  | 14  | 14597 | 146  | 575.288 | 1148.56 | 14.2 | 0.25     | -           | MAHKSTGVFR V |
|            | hypothetical protein IY08_04695    |     |       |      |         |         |      |          |             | NGGSGSFYAAA  |
| KGT45154.1 | [Bacillus cereus]                  | 21  | 14727 | 695  | 579.776 | 1157.54 | 21.2 | 0.03     | R           | R T          |
|            | hypothetical protein IY08_04695    |     |       |      |         |         |      |          |             | TQILKDDFSLIN |
| KGT45154.1 | [Bacillus cereus]                  | 21  | 14727 | 1406 | 583.65  | 1747.93 | 8.88 | 0.54     | R           | GER E        |
|            | hypothetical protein IY08_04725    |     |       |      |         |         |      |          |             | QLEKEMQQSLL  |
| KGT45159.1 | [Bacillus cereus]                  | 13  | 14393 | 1157 | 738.402 | 1474.79 | 13.2 | 0.22     | K           | K T          |
| KGT45224.1 | glucosaminidase [Bacillus cereus]  | 128 | 70021 | 75   | 621.314 | 1240.61 | 39.5 | 0.0005   | K           | YENEFLWIK D  |
|            |                                    |     |       |      |         |         |      |          |             | VISDNPTVTEAY |
| KGT45224.1 | glucosaminidase [Bacillus cereus]  | 128 | 70021 | 176  | 810.929 | 1619.84 | 47.7 | 3.40E-05 | K           | IAK E        |
|            |                                    |     |       |      |         |         |      |          |             | TFGDETFYQYF  |
| KGT45224.1 | glucosaminidase [Bacillus cereus]  | 128 | 70021 | 290  | 1082.51 | 2163    | 60.5 | 3.60E-06 | K           | NYLSLR S     |
|            |                                    |     |       |      |         |         |      |          |             | YNVNALFLYSLA |
|            |                                    |     |       |      |         |         |      |          |             | IHESYYGTSALA |
| KGT45224.1 | glucosaminidase [Bacillus cereus]  | 128 | 70021 | 380  | 936.816 | 2807.43 | 34.5 | 0.0017   | K           | K D          |
|            |                                    |     |       |      |         |         |      |          |             | SIKPDSPLIGLG |
| KGT45224.1 | glucosaminidase [Bacillus cereus]  | 128 | 70021 | 108  | 662.896 | 1323.78 | 0.18 | 0.96     | K           | K K          |
| KGT45283.1 | DNA helicase [Bacillus cereus]     | 14  | 48670 | 592  | 485.293 | 968.572 | 13.9 | 0.041    | K           | RPLLSDLR E   |
|            | hypothetical protein IY08_04625    |     |       |      |         |         |      |          |             |              |
| KGT45289.1 | [Bacillus cereus]                  | 23  | 6010  | 448  | 492.765 | 983.515 | 22.8 | 0.013    | R           | EVSAYFLR K   |
|            | hypothetical protein IY08_04625    |     |       |      |         |         |      |          |             |              |
| KGT45289.1 | [Bacillus cereus]                  | 22  | 6010  | 70   | 598.359 | 597.352 | 6.99 | 0.2      | K           | KPTPR R      |
|            | transcriptional regulator TenI     |     |       |      |         |         |      |          |             |              |
| KGT45306.1 | [Bacillus cereus]                  | 19  | 22883 | 255  | 627.392 | 626.385 | 19   | 0.013    | K           | KGVPAR G     |

|            |                                                               |     |       |      |         |         |      |          |   |              |   |
|------------|---------------------------------------------------------------|-----|-------|------|---------|---------|------|----------|---|--------------|---|
| KGT45326.1 | peptide ABC transporter ATP-binding protein [Bacillus cereus] | 21  | 24249 | 450  | 494.282 | 986.549 | 21.4 | 0.05     | - | MIQLANVAK    | G |
|            |                                                               |     |       |      |         |         |      |          |   | NAQFMIETGEV  |   |
|            |                                                               |     |       |      |         |         |      |          |   | HALMGENGAG   |   |
| KGT45425.1 | sugar ABC transporter ATP-binding protein [Bacillus cereus]   | 23  | 54370 | 1188 | 774.374 | 2320.1  | 23.2 | 0.0087   | K | K            | S |
| KGT45452.1 | DNA-binding protein [Bacillus cereus]                         | 55  | 56202 | 669  | 519.262 | 1036.51 | 55.2 | 6.60E-06 | R | YNALGDVSAK   | T |
| KGT45452.1 | DNA-binding protein [Bacillus cereus]                         | 55  | 56202 | 2330 | 879.429 | 1756.84 | 2.48 | 1.3      | R | QNTTTKYNETV  |   |
|            |                                                               |     |       |      |         |         |      |          |   | TINK         | K |
| KGT45452.1 | DNA-binding protein [Bacillus cereus]                         | 55  | 56202 | 2423 | 915.954 | 1829.89 | 1.75 | 0.68     | K | VNVVQIDSNTI  |   |
| KGT45452.1 | DNA-binding protein [Bacillus cereus]                         | 122 | 56202 | 180  | 605.326 | 1208.64 | 28.7 | 0.0061   | K | GQATLR       | L |
| KGT45452.1 | DNA-binding protein [Bacillus cereus]                         | 122 | 56202 | 185  | 608.831 | 1215.65 | 28.5 | 0.0041   | K | YNETVTINKK   | - |
| KGT45452.1 | DNA-binding protein [Bacillus cereus]                         | 122 | 56202 | 259  | 656.318 | 1310.62 | 47.2 | 7.10E-05 | K | GLVYLPENPSK  | W |
|            |                                                               |     |       |      |         |         |      |          |   | SEQDAMLQYV   |   |
| KGT45452.1 | DNA-binding protein [Bacillus cereus]                         | 122 | 56202 | 403  | 802.896 | 1603.78 | 21.9 | 0.0094   | K | K            | N |
| KGT45452.1 | DNA-binding protein [Bacillus cereus]                         | 122 | 56202 | 478  | 619.66  | 1855.96 | 65.1 | 1.40E-06 | K | AAFIGDSSPVE  |   |
| KGT45452.1 | DNA-binding protein [Bacillus cereus]                         | 122 | 56202 | 478  | 619.66  | 1855.96 | 65.1 | 1.40E-06 | K | DATPK        | Y |
| KGT45452.1 | DNA-binding protein [Bacillus cereus]                         | 122 | 56202 | 478  | 619.66  | 1855.96 | 65.1 | 1.40E-06 | K | GVSSVAMHAG   |   |
| KGT45452.1 | DNA-binding protein [Bacillus cereus]                         | 133 | 56202 | 312  | 703.883 | 1405.75 | 13   | 0.26     | K | STLAITNPK    | L |
| KGT45452.1 | DNA-binding protein [Bacillus cereus]                         | 133 | 56202 | 460  | 599.944 | 1796.81 | 10.1 | 0.27     | K | TIVSPEQSFGIT |   |
|            |                                                               |     |       |      |         |         |      |          |   | K            | G |
|            |                                                               |     |       |      |         |         |      |          |   | NGGSIFFIADHY |   |
| KGT45483.1 | peptidoglycan transglycosylase [Bacillus cereus]              | 20  | 29499 | 1120 | 481.275 | 1440.8  | 20.5 | 0.028    | K | NADR         | N |
|            |                                                               |     |       |      |         |         |      |          |   | STPITYEDLKDY |   |
| KGT45452.1 | DNA-binding protein [Bacillus cereus]                         | 133 | 56202 | 608  | 977.167 | 2928.48 | 24.4 | 0.019    | K | NVFIVPEANIPY |   |
|            |                                                               |     |       |      |         |         |      |          |   | K            | K |
| KGT45483.1 | peptidoglycan transglycosylase [Bacillus cereus]              | 20  | 29499 | 1120 | 481.275 | 1440.8  | 20.5 | 0.028    | K | VALNPMTKLFY  |   |
|            |                                                               |     |       |      |         |         |      |          |   | K            | A |
|            |                                                               |     |       |      |         |         |      |          |   | ASVENIKAGGV  |   |
| KGT45483.1 | peptidoglycan transglycosylase [Bacillus cereus]              | 20  | 29499 | 1816 | 792.091 | 2373.25 | 3.31 | 1.8      | R | VQGGSTITQQL  |   |
|            |                                                               |     |       |      |         |         |      |          |   | SK           | N |
| KGT45497.1 | flotillin [Bacillus cereus]                                   | 86  | 57562 | 417  | 476.765 | 951.516 | 35   | 0.00084  | K | EVLEGLHR     | A |
| KGT45497.1 | flotillin [Bacillus cereus]                                   | 86  | 57562 | 656  | 565.794 | 1129.57 | 28.8 | 0.0074   | K | AQGTAEADVIR  | L |

|            |                                                                                              |      |       |      |         |         |      |          |   |                                           |   |
|------------|----------------------------------------------------------------------------------------------|------|-------|------|---------|---------|------|----------|---|-------------------------------------------|---|
| KGT45497.1 | flotillin [Bacillus cereus]                                                                  | 86   | 57562 | 1077 | 705.92  | 1409.83 | 24.5 | 0.0036   | K | QGVPTVNGV<br>SIK                          | V |
| KGT45497.1 | flotillin [Bacillus cereus]                                                                  | 86   | 57562 | 1128 | 726.353 | 1450.69 | 40.5 | 0.00052  | R | ADADLSYELQQ<br>AK                         | A |
| KGT45497.1 | flotillin [Bacillus cereus]                                                                  | 86   | 57562 | 1520 | 942.495 | 1882.98 | 28.4 | 0.0063   | R | TVGPDEALIVT<br>GNWLGGGK                   | N |
| KGT45497.1 | flotillin [Bacillus cereus]                                                                  | 90   | 57562 | 367  | 444.743 | 887.471 | 9.13 | 0.82     | K | QIELEEK<br>GGGTFVVPIM                     | E |
| KGT45497.1 | flotillin [Bacillus cereus]                                                                  | 90   | 57562 | 884  | 639.337 | 1276.66 | 4.99 | 0.34     | R | QR                                        | A |
| KGT45510.1 | glycerol-3-phosphate ABC<br>transporter substrate-binding<br>alanine dehydrogenase [Bacillus | 21   | 50384 | 91   | 516.306 | 515.299 | 20.8 | 0.0083   | K | AGALGK<br>GAGLGSGFTDA                     | Y |
| KGT45533.1 | cereus]                                                                                      | 95   | 40315 | 1446 | 899.935 | 1797.86 | 21.1 | 0.045    | K | QYVEAGAK<br>YTGSSDNGGV                    | I |
| KGT45540.1 | bacillolysin [Bacillus cereus]                                                               | 732  | 60882 | 2498 | 640.967 | 1919.88 | 122  | 2.90E-12 | R | HTNSGIINK<br>SLNTTSLGSSYY                 | Q |
| KGT45540.1 | bacillolysin [Bacillus cereus]                                                               | 732  | 60882 | 2592 | 1010.49 | 2018.96 | 30   | 0.0021   | K | LQDNTR<br>AGAVQAAADL<br>YGANSAEVA         | G |
| KGT45540.1 | bacillolysin [Bacillus cereus]                                                               | 732  | 60882 | 2622 | 683.021 | 2046.04 | 41.7 | 0.00012  | R | AV<br>K                                   | Q |
| KGT45540.1 | bacillolysin [Bacillus cereus]                                                               | 732  | 60882 | 2648 | 693.01  | 2076.01 | 40.5 | 0.00054  | K | RYTGSSDNGGV<br>HTNSGIINK                  | Q |
| KGT45540.1 | bacillolysin [Bacillus cereus]                                                               | 732  | 60882 | 2708 | 707.379 | 2119.11 | 29.3 | 0.0048   | K | QAYLLANGGTH<br>YGVTVTGIGK                 | D |
| KGT45540.1 | bacillolysin [Bacillus cereus]                                                               | 759  | 60882 | 781  | 550.278 | 1098.54 | 12.3 | 0.24     | R | NSINDAGAPLK<br>GVLGDTKSLNT<br>TLSGSSYYLQD | S |
| KGT45540.1 | bacillolysin [Bacillus cereus]                                                               | 759  | 60882 | 3032 | 897.448 | 2689.32 | 23.9 | 0.014    | K | NTR                                       | G |
| KGT45540.1 | bacillolysin [Bacillus cereus]                                                               | 49   | 60882 | 477  | 925.941 | 1849.87 | 21.5 | 0.034    | R | ANTQYFTQSTT<br>FSQAR                      | A |
| KGT45540.1 | bacillolysin [Bacillus cereus]                                                               | 1786 | 60882 | 147  | 428.239 | 854.463 | 46   | 5.00E-05 | K | LGAIYYR                                   | A |
| KGT45540.1 | bacillolysin [Bacillus cereus]                                                               | 1786 | 60882 | 247  | 361.16  | 1080.46 | 48.9 | 2.50E-05 | K | YGDPDHYSK                                 | R |
| KGT45540.1 | bacillolysin [Bacillus cereus]                                                               | 1786 | 60882 | 252  | 543.778 | 1085.54 | 46.9 | 7.10E-05 | R | GATIFTYDAK                                | N |



|            |                                                                                 |      |       |      |         |         |      |          |   |                                                                                    |   |
|------------|---------------------------------------------------------------------------------|------|-------|------|---------|---------|------|----------|---|------------------------------------------------------------------------------------|---|
| KGT45540.1 | bacillolysin [Bacillus cereus]                                                  | 1786 | 60882 | 261  | 549.802 | 1097.59 | 34.9 | 0.00081  | K | DKLGAIYYR                                                                          | A |
| KGT45540.1 | bacillolysin [Bacillus cereus]                                                  | 1786 | 60882 | 386  | 619.287 | 1236.56 | 52.8 | 1.90E-05 | K | YGDPDHYSKR<br>ATFNRSINDA                                                           | Y |
| KGT45540.1 | bacillolysin [Bacillus cereus]                                                  | 1786 | 60882 | 768  | 563.958 | 1688.85 | 63.1 | 1.20E-06 | K | GAPLK<br>NPDWEIGEDIY                                                               | S |
| KGT45540.1 | bacillolysin [Bacillus cereus]                                                  | 1786 | 60882 | 798  | 867.406 | 1732.8  | 62.8 | 1.90E-06 | R | TPGK<br>SMSDPTKYGDP                                                                | A |
| KGT45540.1 | bacillolysin [Bacillus cereus]                                                  | 1786 | 60882 | 861  | 609.936 | 1826.79 | 22   | 0.0098   | R | DHYSK<br>QAYLLANGGTH<br>YGVTVTGIGKD                                                | R |
| KGT45540.1 | bacillolysin [Bacillus cereus]                                                  | 1786 | 60882 | 1204 | 591.812 | 2363.22 | 71.8 | 2.50E-07 | K | K                                                                                  | L |
| KGT45540.1 | bacillolysin [Bacillus cereus]                                                  | 1786 | 60882 | 1344 | 979.498 | 2935.47 | 66.9 | 5.30E-07 | R | AGAVQAAADL<br>YGANSAEVAHV<br>KQSFSAVGVN<br>STLPGLTWADA<br>DNVFNAAYDA<br>AAVDAHYYAG | - |
| KGT45540.1 | bacillolysin [Bacillus cereus]                                                  | 1786 | 60882 | 1380 | 840.399 | 3357.57 | 29.4 | 0.0054   | R | K                                                                                  | T |
| KGT45540.1 | bacillolysin [Bacillus cereus]                                                  | 1812 | 60882 | 146  | 426.693 | 851.371 | 9.78 | 0.24     | K | TYDYKK                                                                             | A |
| KGT45540.1 | bacillolysin [Bacillus cereus]                                                  | 1812 | 60882 | 276  | 557.338 | 1112.66 | 18.5 | 0.028    | K | AVVKPVTGTNK<br>VGTKGKVLD                                                           | V |
| KGT45540.1 | bacillolysin [Bacillus cereus]                                                  | 1812 | 60882 | 289  | 566.322 | 1130.63 | 5.91 | 1.3      | K | TK                                                                                 | S |
| KGT45551.1 | ArsR family transcriptional regulator<br>[Bacillus cereus]                      | 79   | 11242 | 1096 | 618.305 | 1234.6  | 79.2 | 6.30E-08 | R | ISEEDVQMLR                                                                         | A |
| KGT45559.1 | 2-amino-3-ketobutyrate CoA ligase<br>[Bacillus cereus]                          | 44   | 43174 | 743  | 539.279 | 1076.54 | 43.9 | 0.00026  | K | EMLDEAILK                                                                          | Y |
| KGT45570.1 | trehalose-6-phosphate hydrolase<br>[Bacillus cereus]                            | 42   | 65393 | 1923 | 508.282 | 1521.82 | 42.2 | 0.00019  | K | LNLRPYESIVYR                                                                       | Y |
| KGT45574.1 | adenylosuccinate lyase [Bacillus<br>adenylosuccinate lyase [Bacillus<br>cereus] | 22   | 50095 | 412  | 472.75  | 943.486 | 1.47 | 3.4      | R | HADVAFTR<br>AVSETPALGEE                                                            | A |
| KGT45574.1 | cereus]                                                                         | 22   | 50095 | 845  | 629.816 | 1257.62 | 16.7 | 0.09     | R | R                                                                                  | K |

|            |                                                                                 |     |       |      |         |         |      |          |   |                             |   |
|------------|---------------------------------------------------------------------------------|-----|-------|------|---------|---------|------|----------|---|-----------------------------|---|
| KGT45574.1 | adenylosuccinate lyase [Bacillus cereus]                                        | 22  | 50095 | 1037 | 688.336 | 1374.66 | 20.9 | 0.041    | R | NPIGSENMTGL<br>AR           | V |
| KGT45574.1 | adenylosuccinate lyase [Bacillus cereus]                                        | 22  | 50095 | 1180 | 498.931 | 1493.77 | 6.09 | 0.36     | R | THGVHAEPTTF<br>GLK          | L |
| KGT45574.1 | adenylosuccinate lyase [Bacillus cereus]                                        | 22  | 50095 | 1613 | 676.971 | 2027.89 | 3.24 | 1.2      | R | GYMMTAYENV<br>PLWHER        | D |
| KGT45574.1 | adenylosuccinate lyase [Bacillus cereus]                                        | 22  | 50095 | 1767 | 758.092 | 2271.25 | 1.56 | 1        | K | QANEIILKDLEN<br>FVSILANK    | A |
| KGT45582.1 | phosphoribosylaminoimidazolecarb<br>oxamide formyltransferase [Bacillus cereus] | 109 | 55624 | 1502 | 932.485 | 1862.96 | 55.4 | 6.40E-06 | R | AYEADPVSIFG<br>GIIAANR      | E |
| KGT45582.1 | phosphoribosylaminoimidazolecarb<br>oxamide formyltransferase [Bacillus cereus] | 109 | 55624 | 1956 | 935.144 | 2802.41 | 71   | 2.60E-07 | K | ETIAKPDVTFAD<br>AIENIDIGGPT | S |
| KGT45582.1 | phosphoribosylaminoimidazolecarb<br>oxamide formyltransferase [Bacillus cereus] | 114 | 55624 | 407  | 465.77  | 929.525 | 21.7 | 0.037    | K | MIR                         | A |
| KGT45582.1 | phosphoribosylaminoimidazolecarb<br>oxamide formyltransferase [Bacillus cereus] | 114 | 55624 | 746  | 595.329 | 1188.64 | 2.84 | 0.64     | K | IAITQAGEK                   | H |
| KGT45582.1 | phosphoribosylaminoimidazolecarb<br>oxamide formyltransferase [Bacillus cereus] | 114 | 55624 | 1000 | 677.393 | 1352.77 | 17   | 0.043    | K | EFTEPAVVAVK<br>AGITAIQPGGS  | D |
| KGT45582.1 | phosphoribosylaminoimidazolecarb<br>oxamide formyltransferase [Bacillus cereus] | 114 | 55624 | 1182 | 748.828 | 1495.64 | 16   | 0.039    | K | IR                          | V |
| KGT45582.1 | phosphoribosylaminoimidazolecarb<br>oxamide formyltransferase [Bacillus cereus] | 114 | 55624 | 1619 | 681.035 | 2040.08 | 14.2 | 0.14     | K | DDMTIGVGAG<br>QMNR          | V |
| KGT45583.1 | phosphoribosylamine--glycine ligase [Bacillus cereus]                           | 19  | 46094 | 1009 | 679.849 | 1357.68 | 18.8 | 0.018    | R | AGITAIQPGGS<br>IRDEDSIK     | V |
| KGT45592.1 | 1-pyrroline-5-carboxylate<br>dehydrogenase [Bacillus cereus]                    | 59  | 56402 | 244  | 649.843 | 1297.67 | 58.7 | 6.40E-06 | K | FGDPETEVVLP<br>R            | L |
| KGT45608.1 | 4-aminobutyrate aminotransferase [Bacillus cereus]                              | 56  | 50045 | 617  | 498.279 | 994.544 | 55.8 | 9.60E-06 | K | SIVASAFGFSG<br>QK           | C |
| KGT45608.1 | 4-aminobutyrate aminotransferase [Bacillus cereus]                              | 110 | 50045 | 119  | 545.306 | 1088.6  | 27.9 | 0.0024   | K | INEQIPGPK                   | A |
| KGT45608.1 | 4-aminobutyrate aminotransferase [Bacillus cereus]                              | 110 | 50045 | 230  | 641.877 | 1281.74 | 42.5 | 7.90E-05 | K | LAALAPGSFDK<br>SLGAGVPISGVI | Q |
| KGT45608.1 | 4-aminobutyrate aminotransferase [Bacillus cereus]                              | 110 | 50045 | 230  | 641.877 | 1281.74 | 42.5 | 7.90E-05 | K | GR                          | K |

|            |                                                             |     |       |      |         |         |      |          |   |                       |   |
|------------|-------------------------------------------------------------|-----|-------|------|---------|---------|------|----------|---|-----------------------|---|
| KGT45608.1 | 4-aminobutyrate aminotransferase [Bacillus cereus]          | 110 | 50045 | 293  | 679.843 | 1357.67 | 28.6 | 0.0021   | K | FGFGPFAPEVY           | A |
| KGT45608.1 | 4-aminobutyrate aminotransferase [Bacillus cereus]          | 110 | 50045 | 384  | 773.953 | 1545.89 | 52.8 | 6.80E-06 | R | GLLLLSAGTYG           | V |
| KGT45608.1 | 4-aminobutyrate aminotransferase [Bacillus cereus]          | 110 | 50045 | 78   | 494.803 | 987.591 | 14.1 | 0.08     | K | RPGIIAFSK             | G |
| KGT45608.1 | 4-aminobutyrate aminotransferase [Bacillus cereus]          | 110 | 50045 | 92   | 521.754 | 1041.49 | 14.2 | 0.12     | K | APFPYEYR              | R |
| KGT45608.1 | 4-aminobutyrate aminotransferase [Bacillus cereus]          | 110 | 50045 | 458  | 894.984 | 1787.95 | 5.26 | 1.8      | K | QVLFLNSGAEA<br>VENAVK | I |
| KGT45613.1 | peptidase M29 [Bacillus cereus]                             | 27  | 45341 | 1719 | 729.864 | 1457.71 | 27   | 0.0029   | K | VFPDVAPEEQE           | L |
| KGT45613.1 | peptidase M29 [Bacillus cereus]                             | 30  | 45341 | 469  | 399.716 | 797.418 | 17.7 | 0.028    | R | AK<br>HEPIFR          | K |
| KGT45613.1 | peptidase M29 [Bacillus cereus]                             | 23  | 45341 | 1523 | 942.963 | 1883.91 | 3.6  | 1.2      | K | EGAAFMSIYAE           | G |
| KGT45613.1 | peptidase M29 [Bacillus cereus]                             | 23  | 45341 | 1679 | 709.032 | 2124.08 | 23.5 | 0.011    | R | NPDLLK                | A |
| KGT45625.1 | amidohydrolase [Bacillus cereus]                            | 32  | 41566 | 679  | 574.303 | 1146.59 | 31.9 | 0.0046   | - | LKFDLAPEEAFA          | L |
| KGT45628.1 | alkyl hydroperoxide reductase [Bacillus cereus]             | 105 | 20831 | 506  | 430.242 | 858.469 | 29.4 | 0.0052   | R | EFPSWK                | I |
| KGT45628.1 | alkyl hydroperoxide reductase [Bacillus cereus]             | 105 | 20831 | 2611 | 679.657 | 2035.95 | 29.3 | 0.004    | K | MKTLELQER             | G |
| KGT45628.1 | alkyl hydroperoxide reductase [Bacillus cereus]             | 105 | 20831 | 1537 | 464.603 | 1390.79 | 10.8 | 0.21     | - | DASILVNK              | A |
| KGT45647.1 | hypothetical protein IY08_01845 [Bacillus cereus]           | 24  | 41688 | 385  | 458.27  | 914.526 | 24.4 | 0.025    | K | ANAYHNGEFIQ           | F |
| KGT45653.1 | ABC transporter substrate-binding protein [Bacillus cereus] | 28  | 29524 | 61   | 602.296 | 1202.58 | 28.3 | 0.0067   | K | VTDESLK               | S |
| KGT45677.1 | chitinase [Bacillus cereus]                                 | 300 | 74536 | 1402 | 673.873 | 1345.73 | 66.8 | 9.40E-07 | K | MLLIGTEVKPFK          | N |
| KGT45677.1 | chitinase [Bacillus cereus]                                 | 300 | 74536 | 1473 | 684.386 | 1366.76 | 57.8 | 4.30E-06 | R | QKLEIER               | A |
| KGT45677.1 | chitinase [Bacillus cereus]                                 | 300 | 74536 | 1581 | 704.381 | 1406.75 | 67.2 | 1.10E-06 | K | KVFAESTVAFLR          | Y |

|            |                                      |     |       |      |         |         |      |          |             |               |
|------------|--------------------------------------|-----|-------|------|---------|---------|------|----------|-------------|---------------|
|            |                                      |     |       |      |         |         |      |          | VPYLYNATTGT |               |
| KGT45677.1 | chitinase [Bacillus cereus]          | 300 | 74536 | 2992 | 849.057 | 2544.15 | 48.8 | 5.20E-05 | K           | FISYDDNESMK Y |
| KGT45677.1 | chitinase [Bacillus cereus]          | 300 | 74536 | 561  | 473.26  | 944.505 | 0.73 |          | 3.7 K       | SQPTALTVK T   |
|            |                                      |     |       |      |         |         |      |          |             | SYPGSGTTWED   |
| KGT45677.1 | chitinase [Bacillus cereus]          | 300 | 74536 | 2066 | 796.302 | 1590.59 | 6.69 |          | 0.21 K      | CDK Y         |
| KGT45677.1 | chitinase [Bacillus cereus]          | 70  | 74536 | 647  | 560.832 | 1119.65 | 23   |          | 0.0086 K    | LVLGVPFYGR G  |
| KGT45677.1 | chitinase [Bacillus cereus]          | 70  | 74536 | 817  | 620.343 | 1238.67 | 63.9 |          | 1.50E-06 K  | VFAESTVAFLR A |
| KGT45677.1 | chitinase [Bacillus cereus]          | 72  | 74536 | 800  | 612.298 | 1222.58 | 16.9 |          | 0.026 R     | NYQVADIDASK L |
| KGT45677.1 | chitinase [Bacillus cereus]          | 72  | 74536 | 833  | 626.332 | 1250.65 | 9.13 |          | 0.17 K      | WSTTTNSITIK N |
|            |                                      |     |       |      |         |         |      |          |             | AGAEDGKQYLL   |
| KGT45677.1 | chitinase [Bacillus cereus]          | 42  | 74536 | 517  | 679.354 | 2035.04 | 42.1 |          | 0.00019 K   | TIASGASQR Y   |
|            |                                      |     |       |      |         |         |      |          |             | TIISVGGWTWS   |
| KGT45677.1 | chitinase [Bacillus cereus]          | 55  | 74536 | 342  | 738.886 | 1475.76 | 21.9 |          | 0.045 K     | NR F          |
|            |                                      |     |       |      |         |         |      |          |             | IVGYFPSWGVY   |
| KGT45677.1 | chitinase [Bacillus cereus]          | 55  | 74536 | 354  | 750.884 | 1499.75 | 6.98 |          | 0.95 K      | GR N          |
|            | chemical-damaging agent resistance   |     |       |      |         |         |      |          |             | SQNFGQVGNA    |
| KGT45693.1 | protein C [Bacillus cereus]          | 25  | 20954 | 1092 | 712.357 | 1422.7  | 17.8 |          | 0.1 R       | FVR L         |
|            | chemical-damaging agent resistance   |     |       |      |         |         |      |          |             | FNAVGSQFQG    |
| KGT45693.1 | protein C [Bacillus cereus]          | 25  | 20954 | 1332 | 825.449 | 1648.88 | 25.1 |          | 0.011 K     | GLGALVR A     |
|            |                                      |     |       |      |         |         |      |          |             | ETDFIFYNNLQS  |
|            | chemical-damaging agent resistance   |     |       |      |         |         |      |          |             | PCGSVLHTGDN   |
| KGT45693.1 | protein C [Bacillus cereus]          | 25  | 20954 | 1933 | 925.081 | 2772.22 | 6.23 |          | 0.58 K      | R T           |
| KGT45732.1 | penicillin-binding protein [Bacillus | 14  | 46832 | 1021 | 604.306 | 1206.6  | 14.1 |          | 0.048 K     | VNNDIYSILR N  |
|            | penicillin-binding protein [Bacillus |     |       |      |         |         |      |          |             | YIPNFPQGNSI   |
| KGT45732.1 | cereus]                              | 14  | 46832 | 2134 | 810.405 | 1618.8  | 2.86 |          | 1.1 K       | QLK H         |
|            | penicillin-binding protein [Bacillus |     |       |      |         |         |      |          |             | AFVATAIMQLK   |
| KGT45732.1 | cereus]                              | 14  | 46832 | 2240 | 847.924 | 1693.83 | 3.18 |          | 1.1 K       | DQNK L        |
|            | penicillin-binding protein [Bacillus |     |       |      |         |         |      |          |             | NGSVYVVLLSNI  |
| KGT45732.1 | cereus]                              | 14  | 46832 | 2460 | 939.476 | 1876.94 | 1.31 |          | 0.75 K      | QNNIK S       |
|            | formate acetyltransferase [Bacillus  |     |       |      |         |         |      |          |             | SGVITGLPDAY   |
| KGT45740.1 | cereus]                              | 30  | 84810 | 933  | 653.336 | 1304.66 | 22.7 |          | 0.014 K     | GR G          |
|            | formate acetyltransferase [Bacillus  |     |       |      |         |         |      |          |             |               |
| KGT45740.1 | cereus]                              | 30  | 84810 | 1006 | 679.355 | 1356.7  | 22.4 |          | 0.029 R     | TSTFLDIYIER D |

|            |                                             |      |       |      |         |         |      |          |   |                            |   |
|------------|---------------------------------------------|------|-------|------|---------|---------|------|----------|---|----------------------------|---|
| KGT45740.1 | formate acetyltransferase [Bacillus cereus] | 30   | 84810 | 1061 | 696.391 | 1390.77 | 0.87 | 3.6      | K | ALLYAINGGKD<br>EK          | S |
| KGT45740.1 | formate acetyltransferase [Bacillus cereus] | 30   | 84810 | 1120 | 481.275 | 1440.8  | 20.5 | 0.028    | R | VALYGIDHLIEA<br>K          | K |
| KGT45740.1 | formate acetyltransferase [Bacillus cereus] | 30   | 84810 | 1845 | 821.443 | 2461.31 | 7.6  | 0.68     | R | FLHTLDNLGPA<br>PEPNLTVLWSK | Q |
| KGT45780.1 | molecular chaperone GroEL [Bacillus cereus] | 2059 | 57370 | 333  | 407.228 | 812.441 | 34.1 | 0.00099  | R | ALEEPVR                    | Q |
| KGT45780.1 | molecular chaperone GroEL [Bacillus cereus] | 2059 | 57370 | 334  | 408.745 | 815.475 | 30.8 | 0.0045   | K | LVAEVASK                   | T |
| KGT45780.1 | molecular chaperone GroEL [Bacillus cereus] | 2059 | 57370 | 385  | 458.27  | 914.526 | 28.8 | 0.0089   | K | GRNVVLEK                   | K |
| KGT45780.1 | molecular chaperone GroEL [Bacillus cereus] | 2059 | 57370 | 389  | 460.244 | 918.473 | 44.8 | 0.00021  | K | SATVESLGR                  | A |
| KGT45780.1 | molecular chaperone GroEL [Bacillus cereus] | 2059 | 57370 | 435  | 486.791 | 971.567 | 29.7 | 0.0042   | K | TISKPIEGK                  | S |
| KGT45780.1 | molecular chaperone GroEL [Bacillus cereus] | 2059 | 57370 | 450  | 494.282 | 986.549 | 45.1 | 0.00021  | R | GVDTLANAVK                 | V |
| KGT45780.1 | molecular chaperone GroEL [Bacillus cereus] | 2059 | 57370 | 490  | 509.76  | 1017.51 | 80.1 | 5.60E-08 | R | IEDALNSTR                  | A |
| KGT45780.1 | molecular chaperone GroEL [Bacillus cereus] | 2059 | 57370 | 491  | 509.775 | 1017.54 | 29.9 | 0.0059   | K | VGAATETELK                 | E |
| KGT45780.1 | molecular chaperone GroEL [Bacillus cereus] | 2059 | 57370 | 526  | 522.801 | 1043.59 | 47   | 0.0001   | K | AVTAAIEELK                 | T |
| KGT45780.1 | molecular chaperone GroEL [Bacillus cereus] | 2059 | 57370 | 761  | 600.816 | 1199.62 | 40.1 | 0.00032  | K | NVTAGANPMG<br>LR           | K |
| KGT45780.1 | molecular chaperone GroEL [Bacillus cereus] | 2059 | 57370 | 927  | 652.347 | 1302.68 | 118  | 9.60E-12 | K | VGAATETELKE<br>R           | K |
| KGT45780.1 | molecular chaperone GroEL [Bacillus cereus] | 2059 | 57370 | 1013 | 680.85  | 1359.68 | 39.3 | 0.0002   | R | VGNDGVITLEE<br>SK          | G |
| KGT45780.1 | molecular chaperone GroEL [Bacillus cereus] | 2059 | 57370 | 1097 | 713.33  | 1424.65 | 80.8 | 3.10E-08 | R | AQLEETTSEFD<br>R           | E |

|            |                                             |      |       |      |         |         |      |          |   |                                    |   |
|------------|---------------------------------------------|------|-------|------|---------|---------|------|----------|---|------------------------------------|---|
| KGT45780.1 | molecular chaperone GroEL [Bacillus cereus] | 2059 | 57370 | 1219 | 766.922 | 1531.83 | 70.4 | 3.70E-07 | K | FGSPLITNDGVT<br>IAK                | E |
| KGT45780.1 | molecular chaperone GroEL [Bacillus cereus] | 2059 | 57370 | 1272 | 798.366 | 1594.72 | 56.2 | 8.60E-06 | K | EIELEDAFENM<br>GAK                 | L |
| KGT45780.1 | molecular chaperone GroEL [Bacillus cereus] | 2059 | 57370 | 1337 | 827.963 | 1653.91 | 58.1 | 3.00E-06 | R | QIAINAGLEGSV<br>VVER               | L |
| KGT45780.1 | molecular chaperone GroEL [Bacillus cereus] | 2059 | 57370 | 1343 | 554.316 | 1659.93 | 50.9 | 1.90E-05 | K | KFGSPLITNDG<br>VTIAK               | E |
| KGT45780.1 | molecular chaperone GroEL [Bacillus cereus] | 2059 | 57370 | 1371 | 841.899 | 1681.78 | 84   | 1.80E-08 | R | AQLEETTSEFD<br>REK                 | L |
| KGT45780.1 | molecular chaperone GroEL [Bacillus cereus] | 2059 | 57370 | 1496 | 930.431 | 1858.85 | 61.9 | 2.30E-06 | K | GFTTELDVVEG<br>MQFDR               | G |
| KGT45780.1 | molecular chaperone GroEL [Bacillus cereus] | 2059 | 57370 | 1515 | 627.006 | 1878    | 94.2 | 1.60E-09 | K | MEAVLDNPYILI<br>TDKK               | I |
| KGT45780.1 | molecular chaperone GroEL [Bacillus cereus] | 2059 | 57370 | 1545 | 959.971 | 1917.93 | 53.7 | 9.20E-06 | K | ENTTVVEGVGS<br>TEQIEAR             | I |
| KGT45780.1 | molecular chaperone GroEL [Bacillus cereus] | 2059 | 57370 | 1552 | 964.028 | 1926.04 | 61.6 | 2.40E-06 | K | VASIVAEGDEA<br>TGINIVLR            | A |
| KGT45780.1 | molecular chaperone GroEL [Bacillus cereus] | 2059 | 57370 | 1632 | 1034.03 | 2066.05 | 28.8 | 0.002    | R | AAVEEGIVAGG<br>GTSLMNVYTK          | V |
| KGT45780.1 | molecular chaperone GroEL [Bacillus cereus] | 2059 | 57370 | 1662 | 1053.53 | 2105.05 | 47.3 | 0.0001   | K | TNDVAGDGTT<br>TATVLAQAMIR          | E |
| KGT45780.1 | molecular chaperone GroEL [Bacillus cereus] | 2059 | 57370 | 1753 | 749.393 | 2245.16 | 80.2 | 4.40E-08 | K | AMLEDIAILTG<br>GEVITEELGR          | D |
| KGT45780.1 | molecular chaperone GroEL [Bacillus cereus] | 2059 | 57370 | 1816 | 792.091 | 2373.25 | 76.1 | 9.40E-08 | R | KAMLEDIAILTG<br>GEVITEELGR         | D |
| KGT45780.1 | molecular chaperone GroEL [Bacillus cereus] | 2059 | 57370 | 1837 | 817.44  | 2449.3  | 31.1 | 0.0027   | R | ALEEPVRQIAIN<br>AGLEGSVVVER        | L |
| KGT45780.1 | molecular chaperone GroEL [Bacillus cereus] | 2059 | 57370 | 1865 | 854.431 | 2560.27 | 117  | 1.10E-11 | K | VGVGFNAAATG<br>EWWNMLESIGI<br>VDPK | V |

|            |                                             |      |       |      |         |         |      |          |   |                                       |   |
|------------|---------------------------------------------|------|-------|------|---------|---------|------|----------|---|---------------------------------------|---|
| KGT45780.1 | molecular chaperone GroEL [Bacillus cereus] | 2059 | 57370 | 1904 | 887.123 | 2658.35 | 105  | 1.40E-10 | K | SSIAQVAAISAA<br>DEEVGQLIAEA<br>MER    | V |
| KGT45780.1 | molecular chaperone GroEL [Bacillus cereus] | 2090 | 57370 | 195  | 307.697 | 613.379 | 12.5 | 0.15     | K | VTLGPK                                | G |
| KGT45780.1 | molecular chaperone GroEL [Bacillus cereus] | 2090 | 57370 | 277  | 351.215 | 700.415 | 6.31 | 0.86     | R | NVVLEK                                | K |
| KGT45780.1 | molecular chaperone GroEL [Bacillus cereus] | 2090 | 57370 | 285  | 360.176 | 718.337 | 16.4 | 0.095    | K | APGFGDR                               | R |
| KGT45780.1 | molecular chaperone GroEL [Bacillus cereus] | 2090 | 57370 | 296  | 369.675 | 737.335 | 19.1 | 0.036    | K | FSEEAR                                | R |
| KGT45780.1 | molecular chaperone GroEL [Bacillus cereus] | 2090 | 57370 | 339  | 414.27  | 826.525 | 17.3 | 0.019    | K | LAGGVAVIK                             | V |
| KGT45780.1 | molecular chaperone GroEL [Bacillus cereus] | 2090 | 57370 | 411  | 467.77  | 933.526 | 22.6 | 0.016    | R | GTFNVVAVK<br>GYASPYMITDS              | A |
| KGT45780.1 | molecular chaperone GroEL [Bacillus cereus] | 2090 | 57370 | 1140 | 732.327 | 1462.64 | 12.4 | 0.15     | R | DK                                    | M |
| KGT45780.1 | molecular chaperone GroEL [Bacillus cereus] | 2090 | 57370 | 1322 | 548.626 | 1642.86 | 13.4 | 0.18     | R | EGLKNVTAGA<br>NPMGLR                  | K |
| KGT45780.1 | molecular chaperone GroEL [Bacillus cereus] | 2090 | 57370 | 1401 | 867.96  | 1733.9  | 6.17 | 1.2      | K | MEAVLDNPYILI<br>TDK                   | K |
| KGT45780.1 | molecular chaperone GroEL [Bacillus cereus] | 2090 | 57370 | 2020 | 1067.85 | 3200.52 | 18.6 | 0.053    | R | VGNDGVITLEE<br>SKGFTTELDVV<br>EGMQFDR | G |
| KGT45781.1 | GMP synthase [Bacillus cereus]              | 31   | 57913 | 2231 | 841.965 | 1681.92 | 30.6 | 0.0022   | R | VLGSELGIPDEI<br>VWR                   | Q |
| KGT45781.1 | GMP synthase [Bacillus cereus]              | 31   | 57913 | 151  | 560.284 | 559.277 | 1    | 0.79     | K | AMNPK                                 | G |
| KGT45781.1 | GMP synthase [Bacillus cereus]              | 31   | 57913 | 2415 | 912.448 | 1822.88 | 1.34 | 1.2      | K | TFSEGFMNVI<br>KVDK                    | E |
| KGT45781.1 | GMP synthase [Bacillus cereus]              | 36   | 57913 | 667  | 569.823 | 1137.63 | 26.8 | 0.0051   | R | QPFPGPGLGIR<br>AGLDREIWQYF            | V |
| KGT45781.1 | GMP synthase [Bacillus cereus]              | 36   | 57913 | 1694 | 714.029 | 2139.07 | 27.5 | 0.0093   | K | TALPGMR                               | S |
| KGT45781.1 | GMP synthase [Bacillus cereus]              | 36   | 57913 | 461  | 500.283 | 998.551 | 11.7 | 0.16     | R | IPWDVLEK                              | I |

|            |                                    |     |       |      |         |         |      |            |             |              |
|------------|------------------------------------|-----|-------|------|---------|---------|------|------------|-------------|--------------|
|            |                                    |     |       |      |         |         |      |            | TATTAVALMGS |              |
| KGT45803.1 | arginase [Bacillus cereus]         | 27  | 32382 | 705  | 798.919 | 1595.82 | 27.2 | 0.0028 R   | LFGEK       | L            |
|            | glucosamine--fructose-6-phosphate  |     |       |      |         |         |      |            |             | APFTAELDASDI |
| KGT45808.1 | aminotransferase [Bacillus cereus] | 128 | 66027 | 1883 | 753.878 | 1505.74 | 76.2 | 7.10E-08 R | EK          | G            |
|            | glucosamine--fructose-6-phosphate  |     |       |      |         |         |      |            |             | FTLVHNGVIEN  |
| KGT45808.1 | aminotransferase [Bacillus cereus] | 128 | 66027 | 2457 | 625.674 | 1874    | 69.1 | 4.70E-07 R | YELVK       | K            |
|            | glucosamine--fructose-6-phosphate  |     |       |      |         |         |      |            |             | GYDSAGIAVQA  |
| KGT45808.1 | aminotransferase [Bacillus cereus] | 128 | 66027 | 2531 | 971.466 | 1940.92 | 12.9 | 0.28 R     | ENGVVVYK    | E            |
|            | glucosamine--fructose-6-phosphate  |     |       |      |         |         |      |            |             |              |
| KGT45808.1 | aminotransferase [Bacillus cereus] | 298 | 66027 | 775  | 606.333 | 1210.65 | 64.8 | 1.20E-06 K | EIDEQPLVIR  | N            |
|            | glucosamine--fructose-6-phosphate  |     |       |      |         |         |      |            |             | ALTITNVPGSTL |
| KGT45808.1 | aminotransferase [Bacillus cereus] | 298 | 66027 | 1106 | 715.403 | 1428.79 | 49.6 | 4.30E-05 K | SR          | E            |
|            | glucosamine--fructose-6-phosphate  |     |       |      |         |         |      |            |             | YQDENGIEILN  |
| KGT45808.1 | aminotransferase [Bacillus cereus] | 298 | 66027 | 1477 | 918.425 | 1834.83 | 53.1 | 1.60E-05 K | QDIR        | N            |
|            | glucosamine--fructose-6-phosphate  |     |       |      |         |         |      |            |             | CGIVGFIGEQLD |
| KGT45808.1 | aminotransferase [Bacillus cereus] | 298 | 66027 | 1579 | 660.35  | 1978.03 | 21.4 | 0.0099 M   | AKEILLK     | G            |
|            |                                    |     |       |      |         |         |      |            |             | NTLSLLHGSYAI |
|            | glucosamine--fructose-6-phosphate  |     |       |      |         |         |      |            |             | GLLDAENPNMI  |
| KGT45808.1 | aminotransferase [Bacillus cereus] | 298 | 66027 | 1975 | 973.173 | 2916.5  | 35.5 | 0.0013 R   | YVAK        | N            |
|            | glucosamine--fructose-6-phosphate  |     |       |      |         |         |      |            |             |              |
| KGT45808.1 | aminotransferase [Bacillus cereus] | 301 | 66027 | 341  | 418.731 | 835.447 | 5.43 | 1.4 K      | QFLATTR     | N            |
|            | glucosamine--fructose-6-phosphate  |     |       |      |         |         |      |            |             | AVLVQTNEMG   |
| KGT45808.1 | aminotransferase [Bacillus cereus] | 301 | 66027 | 982  | 671.846 | 1341.68 | 16.6 | 0.11 R     | HK          | A            |
|            | glucosamine--fructose-6-phosphate  |     |       |      |         |         |      |            |             | CGIVGFIGEQLD |
| KGT45808.1 | aminotransferase [Bacillus cereus] | 301 | 66027 | 1050 | 691.826 | 1381.64 | 6.17 | 0.89 M     | AK          | E            |
|            | glucosamine--fructose-6-phosphate  |     |       |      |         |         |      |            |             | AYTAQLAVLSIL |
| KGT45808.1 | aminotransferase [Bacillus cereus] | 301 | 66027 | 1476 | 611.359 | 1831.06 | 8.19 | 0.15 K     | AADIAK      | A            |
|            | glucosamine--fructose-6-phosphate  |     |       |      |         |         |      |            |             | EADYTLPLYAG  |
| KGT45808.1 | aminotransferase [Bacillus cereus] | 301 | 66027 | 1663 | 1055.05 | 2108.08 | 2.17 | 0.62 R     | PEIAVASTK   | A            |
|            | peptide ABC transporter substrate- |     |       |      |         |         |      |            |             |              |
| KGT45828.1 | binding protein [Bacillus cereus]  | 63  | 61233 | 173  | 602.839 | 1203.66 | 8.11 | 0.92 K     | LEEINFNVVK  | D            |
|            | pyrroline-5-carboxylate reductase  |     |       |      |         |         |      |            |             |              |
| KGT45831.1 | [Bacillus cereus]                  | 19  | 29183 | 239  | 327.701 | 653.388 | 19.2 | 0.012 M    | LTKHR       | I            |



|            |                                                                                            |    |       |      |         |         |      |          |   |                            |   |
|------------|--------------------------------------------------------------------------------------------|----|-------|------|---------|---------|------|----------|---|----------------------------|---|
| KGT45862.1 | HAD family hydrolase [Bacillus<br>4-hydroxyphenylpyruvate<br>dioxygenase [Bacillus cereus] | 21 | 32292 | 200  | 588.335 | 587.327 | 10.2 | 0.11     | K | VINSR<br>IVAYSGLETGN       | C |
| KGT45866.1 | dioxygenase [Bacillus cereus]<br>4-hydroxyphenylpyruvate<br>dioxygenase [Bacillus cereus]  | 26 | 42066 | 889  | 640.334 | 1278.65 | 26.1 | 0.0053   | K | R                          | E |
| KGT45866.1 | homogentisate 1,2-dioxygenase<br>[Bacillus cereus]                                         | 26 | 42066 | 583  | 544.772 | 1087.53 | 0.19 | 4.2      | K | FPINPADGK<br>FLVVEANSQITT  | R |
| KGT45868.1 | [Bacillus cereus]                                                                          | 39 | 45213 | 2029 | 787.921 | 1573.83 | 38.8 | 0.00023  | K | PR<br>AGITEPILVLGP         | R |
| KGT45878.1 | alanine racemase [Bacillus cereus]                                                         | 17 | 43792 | 2127 | 808.977 | 1615.94 | 17.4 | 0.02     | R | SPPR                       | D |
| KGT45888.1 | Clp protease ClpX [Bacillus cereus]                                                        | 22 | 90572 | 76   | 621.851 | 1241.69 | 22.4 | 0.021    | K | VQKEVEALIGR                | G |
| KGT45894.1 | glutamyl-tRNA synthetase [Bacillus<br>cereus]                                              | 93 | 55642 | 785  | 608.331 | 1214.65 | 51.8 | 1.40E-05 | R | TALFNLYFAR<br>ELTEEQVKEFEA | H |
| KGT45894.1 | glutamyl-tRNA synthetase [Bacillus<br>cereus]                                              | 93 | 55642 | 1442 | 598.623 | 1792.85 | 28.3 | 0.0043   | R | EGR<br>VATTGQTHGPE         | I |
| KGT45894.1 | glutamyl-tRNA synthetase [Bacillus<br>cereus]                                              | 93 | 55642 | 1651 | 696.722 | 2087.14 | 45.5 | 6.30E-05 | R | LPNAIALLGK                 | E |
| KGT45894.1 | glutamyl-tRNA synthetase [Bacillus<br>cereus]                                              | 93 | 55642 | 542  | 525.776 | 1049.54 | 11.1 | 0.14     | K | LYEDLLER                   | G |
| KGT45894.1 | glutamyl-tRNA synthetase [Bacillus<br>cereus]                                              | 93 | 55642 | 657  | 566.288 | 1130.56 | 9.54 | 0.52     | R | NVAGGEESQLK<br>AFAGQIEALEA | Y |
| KGT45894.1 | glutamyl-tRNA synthetase [Bacillus<br>cereus]                                              | 93 | 55642 | 1511 | 625.99  | 1874.95 | 4.11 | 0.49     | R | MEPAAIK<br>TEFDVELTSAG     | A |
| KGT45907.1 | 50S ribosomal protein L7/L12<br>[Bacillus cereus]                                          | 25 | 12510 | 1856 | 748.366 | 1494.72 | 25.5 | 0.0041   | K | AQK                        | I |
| KGT45910.1 | DNA-directed RNA polymerase<br>subunit beta~ [Bacillus cereus]                             | 29 | 1E+05 | 533  | 458.778 | 915.542 | 29.4 | 0.0034   | R | KGLADTALK                  | T |
| KGT45910.1 | DNA-directed RNA polymerase<br>subunit beta~ [Bacillus cereus]                             | 36 | 1E+05 | 318  | 661.323 | 660.315 | 25.5 | 0.016    | K | TAQGQR<br>QEVVVQGEVE       | R |
| KGT45910.1 | DNA-directed RNA polymerase<br>subunit beta~ [Bacillus cereus]                             | 36 | 1E+05 | 1384 | 671.867 | 1341.72 | 2.04 | 3        | R | AR                         | T |
| KGT45913.1 | 30S ribosomal protein S7 [Bacillus<br>elongation factor Tu [Bacillus<br>cereus]            | 18 | 17899 | 255  | 627.392 | 626.385 | 18.4 | 0.014    | K | GPVAKR<br>TTLTAAITTVLA     | D |
| KGT45915.1 | [Bacillus cereus]                                                                          | 60 | 43004 | 930  | 652.396 | 1302.78 | 33.5 | 0.00045  | K | K                          | A |

|            |                                                             |     |       |      |         |         |      |         |   |                                    |   |
|------------|-------------------------------------------------------------|-----|-------|------|---------|---------|------|---------|---|------------------------------------|---|
| KGT45915.1 | elongation factor Tu [Bacillus cereus]                      | 60  | 43004 | 1158 | 738.436 | 1474.86 | 24.8 | 0.0033  | R | QVGVPYIVVFL<br>NK                  | C |
| KGT45915.1 | elongation factor Tu [Bacillus cereus]                      | 60  | 43004 | 1353 | 834.46  | 1666.91 | 31.4 | 0.0026  | K | LLDQAQAGDNI<br>GALLR               | G |
| KGT45915.1 | elongation factor Tu [Bacillus cereus]                      | 64  | 43004 | 1713 | 727.708 | 2180.1  | 17.8 | 0.025   | R | ETDKPFLMPVE<br>DVFSITGR            | G |
| KGT45915.1 | elongation factor Tu [Bacillus cereus]                      | 103 | 43004 | 228  | 939.485 | 1876.96 | 23.8 | 0.0059  | R | DLLSEYGFPGD<br>DIPVIK              | G |
| KGT45915.1 | elongation factor Tu [Bacillus cereus]                      | 109 | 43004 | 374  | 912.798 | 2735.37 | 20.4 | 0.012   | K | VGDVVEIIGLAE<br>ENASTTVTGVE<br>MFR | K |
| KGT45932.1 | 50S ribosomal protein L6 [Bacillus cereus]                  | 18  | 19504 | 2201 | 832.429 | 1662.84 | 17.5 | 0.023   | R | ALIGNMVEGVT<br>EGFAR               | G |
| KGT45944.1 | DNA-directed RNA polymerase subunit alpha [Bacillus cereus] | 17  | 34960 | 92   | 648.341 | 1294.67 | 16.8 | 0.027   | R | GYGTTLGNSLR<br>R                   | I |
| KGT45969.1 | methionine--tRNA ligase [Bacillus cereus]                   | 20  | 75333 | 2848 | 762.752 | 2285.23 | 20.3 | 0.028   | K | KAEELNITPQAY<br>VDNIVAGIK          | E |
| KGT45969.1 | methionine--tRNA ligase [Bacillus cereus]                   | 58  | 75333 | 1385 | 851.452 | 1700.89 | 41.1 | 0.00019 | R | INFDLANDLGN<br>LLNR                | T |
| KGT45969.1 | methionine--tRNA ligase [Bacillus cereus]                   | 58  | 75333 | 1425 | 593.611 | 1777.81 | 34.8 | 0.0014  | K | FYEDNPHFIQP<br>ESR                 | K |
| KGT45969.1 | methionine--tRNA ligase [Bacillus cereus]                   | 63  | 75333 | 876  | 637.794 | 1273.57 | 18   | 0.042   | K | MDISYDDFIR<br>SFYITTPIIYPSG        | T |
| KGT45969.1 | methionine--tRNA ligase [Bacillus cereus]                   | 63  | 75333 | 1315 | 818.92  | 1635.82 | 20.5 | 0.024   | K | K<br>QTGIMLMPFLT                   | L |
| KGT45969.1 | methionine--tRNA ligase [Bacillus cereus]                   | 63  | 75333 | 1411 | 883.474 | 1764.93 | 17.2 | 0.099   | R | VAPSK                              | M |
| KGT45984.1 | transcription-repair coupling factor [Bacillus cereus]      | 14  | 1E+05 | 146  | 575.288 | 1148.56 | 14.2 | 0.25    | K | IMMYKQFR<br>VNEMLYIDENQ            | G |
| KGT45989.1 | spore coat protein [Bacillus cereus]                        | 41  | 11627 | 2228 | 841.392 | 1680.77 | 41.5 | 0.0003  | K | GEK                                | T |
| KGT45995.1 | hypoxanthine phosphoribosyltransferase [Bacillus cereus]    | 37  | 20225 | 1300 | 658.358 | 1314.7  | 37.2 | 0.0011  | K | VLISEEQIQEK                        | V |
| KGT45999.1 | cysteine synthase [Bacillus cereus]                         | 35  | 32898 | 278  | 557.765 | 1113.51 | 35.4 | 0.00084 | K | TEQAFEYAR                          | R |

|            |                                 |    |       |      |         |         |      |          |   |                |
|------------|---------------------------------|----|-------|------|---------|---------|------|----------|---|----------------|
|            | inosine-5-monophosphate         |    |       |      |         |         |      |          |   |                |
| KGT46010.1 | dehydrogenase [Bacillus cereus] | 55 | 52618 | 1019 | 603.804 | 1205.59 | 55.5 | 6.30E-06 | K | VGIGPGSICTTR V |
|            | inosine-5-monophosphate         |    |       |      |         |         |      |          |   | EGLTFDDVLLV    |
| KGT46010.1 | dehydrogenase [Bacillus cereus] | 89 | 52618 | 1233 | 772.923 | 1543.83 | 75.3 | 1.30E-07 | K | PAR S          |
|            | inosine-5-monophosphate         |    |       |      |         |         |      |          |   |                |
| KGT46010.1 | dehydrogenase [Bacillus cereus] | 93 | 52618 | 488  | 507.335 | 1012.65 | 0.35 | 0.92     | R | KLVGIITNR D    |
|            | inosine-5-monophosphate         |    |       |      |         |         |      |          |   | AGMGYCGAQ      |
| KGT46010.1 | dehydrogenase [Bacillus cereus] | 93 | 52618 | 1380 | 846.866 | 1691.72 | 20.7 | 0.018    | R | DLEFLR E       |
|            | inosine-5-monophosphate         |    |       |      |         |         |      |          |   | VVAGVGVPQL     |
| KGT46010.1 | dehydrogenase [Bacillus cereus] | 93 | 52618 | 1702 | 1083.04 | 2164.06 | 2.27 | 0.94     | R | TAVYDCATEAR K  |
|            | inosine-5-monophosphate         |    |       |      |         |         |      |          |   |                |
| KGT46010.1 | dehydrogenase [Bacillus cereus] | 27 | 52618 | 253  | 652.866 | 1303.72 | 19.2 | 0.056    | K | LVGIITNRDMR F  |
|            | pyridoxal biosynthesis protein  |    |       |      |         |         |      |          |   | GGVIMDVVNA     |
| KGT46012.1 | [Bacillus cereus]               | 18 | 31937 | 1687 | 723.868 | 1445.72 | 17.8 | 0.03     | K | EQAK I         |
